# Supplementary material for: Integrated kidney and urine proteomics define encrypted antimicrobial peptides as effectors of host defence in human pyelonephritis
Source: bioRxiv preprint, doi:10.64898/2026.04.10.717476, version 1 (2026-04-14)
Supplement: Supplementary Table 2 - LC-MSMS-based Proteomics of Kidney Pyelonephritis [file 717476_file03.xlsx]

## Sheet: Supp Tab 2
Supplementary Table 2: LC-MS/MS-based proteomics of kidney pyelonephritis.
Abbreviations: PN-pyelonephritis; PSM-peptide spectrum match; AA-number of amino acids in protein; FC-fold change; pV.fdrBH-Benjamini-Hochberg corrected p-value; snr-signal-to-noise ratio; *PN10 was excluded from statistical analysis as an outlier
Accession	GENENAME	Description	# PSMs	# Unique Peptides	# AAs	Control1	Control2	Control3	Control4	Control5	Control6	Control7	Control8	Control9	Control10	PN1	PN2	PN3	PN4	PN5	PN6	PN7	PN8	PN9	PN10*	Log2fc_PN.Control	pV.fdrBH_ttest_PN.Control	snr_PN.Control
P02768	ALB	Serum albumin OS=Homo sapiens OX=9606 GN=ALB PE=1 SV=2	4075	86	609	74972327013	41959851495	28477709811	5476838899	33296780267	48980765654	56661578475	34651775597	104988000000	43497119125	22695119432	14758070718	14935025130	39768529094	26187162334	10650729202	33108328848	25448035694	43776125683	33352785692	-0.879826	0.07326	-0.588927
P98160	HSPG2	Basement membrane-specific heparan sulfate proteoglycan core protein OS=Homo sapiens OX=9606 GN=HSPG2 PE=1 SV=4	2429	134	4391	4586608093	3217815463	6332235948	5255190065	4714737402	4990449060	4764915372	5753864298	5240414977	4028306829	3128257130	5218004554	3732626390	3662249329	1403817492	9.35388e+08	8.73314e+08	3572902168	3727162126	4430149910	-0.744853	0.00703826	-0.880648
P60709	ACTB	Actin, cytoplasmic 1 OS=Homo sapiens OX=9606 GN=ACTB PE=1 SV=1	2166	2	375	16075307014	16810366309	12400537058	13801665618	12499558029	14555345272	14060144535	12389205039	11041009272	12046172760	8469226867	13486406512	16127719260	11859081051	10994361426	13965982400	15824626829	12611030970	18061781093	15709194291	-0.00842666	0.953717	-0.017528
P63261	ACTG1	Actin, cytoplasmic 2 OS=Homo sapiens OX=9606 GN=ACTG1 PE=1 SV=1	2149	1	375	0	0	0	0	0	4.38303e+06	0	0	2.39177e+06	0	0	0	0	3.37708e+06	0	0	5.4653e+06	7.33424e+06	0	0	1.40766	0.390994	0.270903
P21333	FLNA	Filamin-A OS=Homo sapiens OX=9606 GN=FLNA PE=1 SV=4	2094	115	2647	1697748169	1183630000	2948855323	2572611867	1958110961	1130631392	1903692667	2364325665	2285589061	4557008358	6312469707	4885843697	2000658291	3786051710	3227140230	2466319716	3140534824	5338596868	1613338437	2045146210	0.687957	0.0623439	0.566568
P12111	COL6A3	Collagen alpha-3(VI) chain OS=Homo sapiens OX=9606 GN=COL6A3 PE=1 SV=5	2084	126	3177	2449249248	1543589577	7207396831	3792623860	2521918791	2356027365	2195010618	2908880265	2544930974	3969000476	5833734170	8734817263	5389328871	6774507088	4360987286	5241628792	3335716758	5360112519	1783837098	5165318694	0.724133	0.044793	0.607253
P35579	MYH9	Myosin-9 OS=Homo sapiens OX=9606 GN=MYH9 PE=1 SV=4	2022	108	1960	1981706186	1847322905	2159459610	2256684491	2002547007	1593212542	2339976958	2069604351	1820241259	1993398399	2976489523	3741260960	3112301578	2371892823	3087182015	1955489401	3486213737	3072762142	2439763008	2293514117	0.539335	0.00352516	1.22892
P68032	ACTC1	Actin, alpha cardiac muscle 1 OS=Homo sapiens OX=9606 GN=ACTC1 PE=1 SV=1	1695	1	377	16807859599	17153331717	14811327670	17322907640	14282258842	13574214392	13175802851	11517570824	12167914189	22601752805	15047434489	15749988551	16803816533	11963357177	15006761047	11735150065	16412879452	15381935954	14727460524	13999522423	-0.0558681	0.696826	-0.12197
P08670	VIM	Vimentin OS=Homo sapiens OX=9606 GN=VIM PE=1 SV=4	1622	52	466	3171186775	2626759405	6440541281	4409752060	4000749140	3470491913	3889682833	3690985965	3651909914	4826412519	7245906095	9458715986	8734212687	10759855400	9144664345	9775556202	11909353014	6490897574	6463043697	5628062393	1.14526	3.36072e-05	1.76218
P62736	ACTA2	Actin, aortic smooth muscle OS=Homo sapiens OX=9606 GN=ACTA2 PE=1 SV=1	1579	1	377	19625591	9.16275e+06	6.98137e+07	4.31916e+07	1.89447e+07	3.80665e+06	2.34128e+07	2.13222e+07	7.4251e+07	2.10272e+08	1.48028e+08	1.12451e+08	7.14802e+06	8.18742e+07	2.10024e+07	2.78553e+07	1.54016e+07	1.48915e+08	1.07038e+07	8.67903e+06	0.367558	0.675059	0.125088
P68871	HBB	Hemoglobin subunit beta OS=Homo sapiens OX=9606 GN=HBB PE=1 SV=2	1554	13	147	14844207412	85961595536	10011777612	2642791077	16528235465	42422690616	17965967948	29234442283	30314845744	19424352128	14066335391	8623178252	17900936310	7660512072	10012025087	53261820483	2477198932	2876946327	9454710566	13652009756	-0.940245	0.247616	-0.34877
Q15149	PLEC	Plectin OS=Homo sapiens OX=9606 GN=PLEC PE=1 SV=3	1529	174	4684	6.20317e+08	5.02883e+08	1044044584	7.97859e+08	8.41569e+08	8.76859e+08	6.69176e+08	7.58793e+08	5.83332e+08	6.58872e+08	1173787236	1775217363	1169079798	1451895238	1983235052	9.42027e+08	1795187787	1223149483	8.54089e+08	8.97656e+08	0.902034	0.00367033	1.20773
P01024	C3	Complement C3 OS=Homo sapiens OX=9606 GN=C3 PE=1 SV=2	1363	85	1663	1585635022	7.09752e+08	1048545883	3.5215e+08	2146277263	9.83196e+08	1767211746	1046114764	3947235661	1632385192	1828683227	1338691111	1258855383	2640181814	2745249587	2103223788	1363543734	3264523048	1052797570	7.69296e+08	0.361404	0.388408	0.256228
Q9Y490	TLN1	Talin-1 OS=Homo sapiens OX=9606 GN=TLN1 PE=1 SV=3	1161	80	2541	6.9262e+08	609175304	8.86855e+08	8.6891e+08	6.80304e+08	7.37322e+08	7.6577e+08	7.12848e+08	7.42619e+08	8.54458e+08	1140241892	1371056222	1161911972	9.44998e+08	9.12553e+08	7.39079e+08	1044849890	1014401070	1099214033	8.35691e+08	0.472356	0.00117074	1.15323
P35749	MYH11	Myosin-11 OS=Homo sapiens OX=9606 GN=MYH11 PE=1 SV=3	1148	105	1972	4.96435e+08	4.00408e+08	8.30693e+08	1033393674	5.52437e+08	447117956	3.99275e+08	5.47429e+08	7.51163e+08	2135201359	4814444027	1824371417	4.01539e+08	1729580729	9.2578e+08	5.96514e+08	7.0483e+08	2678487025	2.17327e+08	5.59994e+08	1.0235	0.221751	0.417438
P35555	FBN1	Fibrillin-1 OS=Homo sapiens OX=9606 GN=FBN1 PE=1 SV=4	1101	81	2871	414581508	216732954	2031599874	8.79962e+08	445345920	4.94033e+08	7.05699e+08	8.96341e+08	5.30788e+08	669832989	3269327607	2897169682	9.66808e+08	9271436797	1635604156	1547979475	2855902770	2482529266	353356547	7.03805e+08	1.94702	0.0464363	0.707931
Q13813	SPTAN1	Spectrin alpha chain, non-erythrocytic 1 OS=Homo sapiens OX=9606 GN=SPTAN1 PE=1 SV=3	1070	100	2472	1047158134	1057595667	7.55268e+08	9.09877e+08	9.20136e+08	9.3061e+08	1065884604	8.63704e+08	7.91086e+08	8.19948e+08	506604687	6.78477e+08	378553359	4.75052e+08	3.07787e+08	9.61782e+07	1.70169e+08	3.27743e+08	7.3874e+08	892884972	-1.16411	6.81125e-05	-1.64357
O43707	ACTN4	Alpha-actinin-4 OS=Homo sapiens OX=9606 GN=ACTN4 PE=1 SV=2	1067	41	911	1809874325	1738747079	1325835210	1577463243	1078656896	1751707687	1776823996	1285581277	1361326102	1735121987	1163135555	1566299472	8.29651e+08	8.27438e+08	1199217474	6.05782e+08	752274456	1125953120	1219188528	1472082903	-0.58119	0.00326371	-0.968158
Q09666	AHNAK	Neuroblast differentiation-associated protein AHNAK OS=Homo sapiens OX=9606 GN=AHNAK PE=1 SV=2	999	150	5890	3.76649e+08	3.19175e+08	7.66379e+08	4.34506e+08	3.91843e+08	2.81808e+08	4.50785e+08	4.9487e+08	4.25412e+08	4.87943e+08	1010486067	1136843781	1016014883	632390931	3.90339e+08	3.51382e+08	5.9556e+08	7.06228e+08	7.00101e+08	5.42391e+08	0.714048	0.0347447	0.733252
P69905	HBA1	Hemoglobin subunit alpha OS=Homo sapiens OX=9606 GN=HBA1 PE=1 SV=2	995	17	142	7709229368	37549947641	5053542853	1292060140	8093017906	14935893524	8291678057	16106697355	16744694159	11460635724	8412770924	5313199777	6996813569	4421664841	3951906228	28678832198	1451819152	1951039107	5238252108	7055093356	-0.78591	0.296649	-0.308403
P14618	PKM	Pyruvate kinase PKM OS=Homo sapiens OX=9606 GN=PKM PE=1 SV=4	939	36	531	1969259176	1655663113	1699272637	2202334620	2686086813	1738646089	2184988186	2486459308	1682801039	1569638134	1340341325	1605651972	2690105074	1616971495	1824295035	4306214699	3291684578	1876478641	2908381348	2083383280	0.262696	0.355819	0.306707
Q01082	SPTBN1	Spectrin beta chain, non-erythrocytic 1 OS=Homo sapiens OX=9606 GN=SPTBN1 PE=1 SV=2	929	83	2364	9.5225e+08	1007566212	6.62563e+08	8.99894e+08	888586485	1043084154	1011272656	8.12196e+08	7.4311e+08	769999917	4.84788e+08	6.2283e+08	3.96117e+08	4.99233e+08	4.01448e+08	1.06335e+08	1.40665e+08	3.14307e+08	7.14053e+08	8.81847e+08	-1.10433	0.00011678	-1.50689
P35580	MYH10	Myosin-10 OS=Homo sapiens OX=9606 GN=MYH10 PE=1 SV=3	889	48	1976	2.33872e+08	1.86737e+08	329647486	2.84932e+08	2.63705e+08	1.58361e+08	2.85829e+08	3.18412e+08	3.48881e+08	4.44427e+08	4.68065e+08	4.344e+08	1.08371e+08	407861227	2.19337e+08	2.36116e+07	2.10323e+08	3.01604e+08	1.03728e+08	2.76971e+08	-0.174063	0.659833	-0.141694
O15230	LAMA5	Laminin subunit alpha-5 OS=Homo sapiens OX=9606 GN=LAMA5 PE=1 SV=8	872	74	3695	621057972	4.76017e+08	1034391205	7.40336e+08	2.63321e+08	6.24174e+08	7.48108e+08	6.87655e+08	6.79504e+08	4.7063e+08	6.9737e+08	9.09747e+08	6.58428e+08	5.32244e+08	2.37202e+08	4.18892e+07	4.61174e+07	659432494	6.89708e+08	7.05565e+08	-0.352696	0.339232	-0.281476
P02751	FN1	Fibronectin OS=Homo sapiens OX=9606 GN=FN1 PE=1 SV=5	832	64	2477	3.99044e+08	2.39178e+08	5.95996e+08	3.21884e+08	4.91499e+08	2.4534e+08	4.91074e+08	3.87684e+08	701278518	7.28546e+08	7.65311e+08	6.05319e+08	6.5999e+08	1186586445	1880732736	6660887488	5061981051	1205356492	810533804	2.91458e+08	2.18537	0.0955799	0.726556
P02545	LMNA	Prelamin-A/C OS=Homo sapiens OX=9606 GN=LMNA PE=1 SV=1	822	42	664	1077445206	1009215380	2154160723	1257261594	1172107712	1289926924	1290957089	1338880797	1030728654	1130167186	2585320893	2187950659	1529891215	2520442883	1765189030	855067524	1676172705	1541317045	1021569150	1446640759	0.450604	0.0825875	0.530215
Q00610	CLTC	Clathrin heavy chain 1 OS=Homo sapiens OX=9606 GN=CLTC PE=1 SV=5	813	48	1675	7.43168e+08	7.97892e+08	5.69533e+08	7.50035e+08	7.41806e+08	8.27107e+08	7.33809e+08	6.53297e+08	5.78503e+08	6.47098e+08	367308819	5.2468e+08	504661558	3.96077e+08	5.75079e+08	608002016	6.63754e+08	468689513	6.70719e+08	6.82877e+08	-0.407333	0.00429114	-0.931551
P06733	ENO1	Alpha-enolase OS=Homo sapiens OX=9606 GN=ENO1 PE=1 SV=2	797	42	434	4149172915	5319262625	2721488628	3272705090	4206818765	3420099904	3377871333	3519620344	2775100454	3032317666	1612710818	1770765352	2880035837	1388546954	1658487674	1917088420	2291848976	1671596651	3700937225	3439683890	-0.769956	0.00229826	-1.01905
P02042	HBD	Hemoglobin subunit delta OS=Homo sapiens OX=9606 GN=HBD PE=1 SV=2	795	8	147	8.08723e+07	4.97153e+08	7.76751e+07	1.59813e+07	1.19211e+08	2.65786e+08	1.26879e+08	3.10478e+08	3.20334e+08	1.60447e+08	3.01799e+08	1.34798e+08	2.18745e+08	7.86481e+07	2.72168e+08	1406981613	2.03151e+07	6.22157e+07	9.10096e+07	116774262	0.541386	0.610674	0.164628
P06576	ATP5F1B	ATP synthase subunit beta, mitochondrial OS=Homo sapiens OX=9606 GN=ATP5F1B PE=1 SV=3	787	26	529	5517122677	4727476373	1711172282	3267273518	3998660133	6168783092	3844526206	4521457796	3672103045	3837220777	6.27279e+08	9.39873e+08	9.29378e+08	6.13289e+08	6.35627e+08	7.75429e+08	8.87364e+08	6.95089e+08	1885642682	4372644881	-2.21686	8.60146e-05	-2.10454
P07437	TUBB	Tubulin beta chain OS=Homo sapiens OX=9606 GN=TUBB PE=1 SV=2	782	4	444	2.61624e+08	2.13198e+08	4.26024e+08	2.62578e+08	2.87461e+08	2.0432e+08	2.37811e+08	2.71134e+08	1.47172e+08	257108168	7.05154e+08	4.6515e+08	5.7626e+08	6.84051e+08	8.09338e+08	7.01885e+08	7.52096e+08	4.50019e+08	3.72104e+08	3.05792e+08	1.25475	0.000364756	1.67426
P68371	TUBB4B	Tubulin beta-4B chain OS=Homo sapiens OX=9606 GN=TUBB4B PE=1 SV=1	776	2	445	4095833305	3984551693	2595326383	3178550120	2317059607	3485333853	2765777020	2556784749	2277123900	2952496048	1817266892	2075464483	2051563742	1758582930	1638958833	1777696628	1951022613	1641842795	3041952249	3185686199	-0.614795	0.00283886	-1.02117
P12814	ACTN1	Alpha-actinin-1 OS=Homo sapiens OX=9606 GN=ACTN1 PE=1 SV=2	775	33	892	1.18389e+08	7.56413e+07	3.57333e+08	2.22553e+08	1.41695e+08	6.96682e+07	1.68247e+08	2.1273e+08	2.0998e+08	3.98623e+08	8.73966e+08	7.58531e+08	5.3039e+08	7.56678e+08	7.41965e+08	7.26231e+08	6.60817e+08	9.7225e+08	2.06247e+08	2.34764e+08	1.80881	9.07561e-05	1.58726
P18206	VCL	Vinculin OS=Homo sapiens OX=9606 GN=VCL PE=1 SV=4	761	56	1134	5.26597e+08	4.91117e+08	6.55875e+08	5.8667e+08	4.33939e+08	5.24352e+08	593727214	6.50645e+08	6.40534e+08	8.53028e+08	1058136866	1215797428	4.96278e+08	8.00412e+08	5.93175e+08	3.65992e+08	4.42374e+08	9.28259e+08	4.76531e+08	6.54687e+08	0.25041	0.393639	0.284742
P26038	MSN	Moesin OS=Homo sapiens OX=9606 GN=MSN PE=1 SV=3	727	31	577	1473685904	1821751223	9.64017e+08	1565325839	1324669520	1360700162	1337846385	1093124010	1156103205	1184149870	634513654	1111393364	1452762558	8.59808e+08	9.33726e+08	1250918779	1298612357	8.73849e+08	1414104096	1083517387	-0.282184	0.113318	-0.469092
P04406	GAPDH	Glyceraldehyde-3-phosphate dehydrogenase OS=Homo sapiens OX=9606 GN=GAPDH PE=1 SV=3	721	25	335	4819099470	5057387349	1901804317	2851053951	2341446558	4119972817	3377610234	2676630411	2433131253	3721760752	1667845622	2009686858	2426220668	1634177714	1186710470	2558020462	2382514369	1818199882	4104669851	3797102984	-0.598885	0.0425689	-0.623254
P05787	KRT8	Keratin, type II cytoskeletal 8 OS=Homo sapiens OX=9606 GN=KRT8 PE=1 SV=7	718	36	483	2311625270	1661819182	1577676534	1843982132	1868407792	1992886958	1746955801	1917464822	1820531599	1469117398	1145455312	1031824842	1091683182	7.74236e+08	8.54661e+08	6.22811e+07	7.41547e+07	1169087328	3214919743	2004135518	-0.799226	0.0389383	-0.711235
P02787	TF	Serotransferrin OS=Homo sapiens OX=9606 GN=TF PE=1 SV=3	703	45	698	1396805004	6.97513e+08	1001672546	1.66039e+08	966474127	1131398631	1138012573	9.59732e+08	3011144413	1362076596	1574963728	1012144829	6.78834e+08	1982785147	1278188593	8.82257e+08	1147297098	1484324541	1070942899	8.18884e+08	0.0615315	0.879152	0.0482572
P25705	ATP5F1A	ATP synthase subunit alpha, mitochondrial OS=Homo sapiens OX=9606 GN=ATP5F1A PE=1 SV=1	698	30	553	4677526759	3815268509	1453411617	3004257925	4255879336	6062960644	3977227191	3843469901	3233156853	3296574197	5.48467e+08	8.27098e+08	8.71554e+08	5.38411e+08	7.74337e+08	8.54142e+08	8.27703e+08	595701804	1798406440	3842186705	-2.14863	3.78746e-05	-1.95316
Q71U36	TUBA1A	Tubulin alpha-1A chain OS=Homo sapiens OX=9606 GN=TUBA1A PE=1 SV=1	693	1	451	3790932833	3322087043	2856458962	3429620712	2996673527	3825078826	3332312000	2689578704	2401674694	2926847467	2287120722	2323636260	2726856663	2194582276	3074468298	2220296709	2471931607	2077952027	2846364314	3390794302	-0.354542	0.00587532	-0.905143
Q9BQE3	TUBA1C	Tubulin alpha-1C chain OS=Homo sapiens OX=9606 GN=TUBA1C PE=1 SV=1	692	2	449	6.70455e+07	8.28923e+07	4.56769e+07	7.94639e+07	7.32092e+07	8.36183e+07	7.74414e+07	6.72165e+07	4.38487e+07	5.49978e+07	6.16251e+07	4.31543e+07	1.19308e+08	63984915	8.05973e+07	8.3058e+07	8.48592e+07	6.64814e+07	8.05605e+07	7.32811e+07	0.16945	0.397391	0.248173
O75369	FLNB	Filamin-B OS=Homo sapiens OX=9606 GN=FLNB PE=1 SV=2	692	78	2602	455991839	3.56409e+08	5.05012e+08	4.16587e+08	4.24183e+08	3.52061e+08	3.90038e+08	4.81599e+08	4.79503e+08	3.78663e+08	2.28843e+08	4.27981e+08	1.92225e+08	118689632	1.75913e+08	6.35642e+07	1.446e+08	2.55643e+08	3.97219e+08	4.84671e+08	-0.928706	0.000946102	-1.2053
Q13885	TUBB2A	Tubulin beta-2A chain OS=Homo sapiens OX=9606 GN=TUBB2A PE=1 SV=1	686	1	445	3.90866e+08	3.38001e+08	4.25392e+08	4.40298e+08	3.34914e+08	3.08343e+08	2.55507e+08	4.02371e+08	3.11562e+08	3.68623e+08	6.36786e+08	5.09106e+08	6.24519e+08	5.40465e+08	5.20549e+08	5.71707e+08	6.93385e+08	4.70204e+08	468563241	454929366	0.645779	8.10532e-05	1.56506
Q9BVA1	TUBB2B	Tubulin beta-2B chain OS=Homo sapiens OX=9606 GN=TUBB2B PE=1 SV=1	686	1	445	5.45643e+06	3.32433e+06	4.44801e+06	2.76728e+06	4.5232e+06	0	4.05299e+06	6.35176e+06	5.40474e+06	3.38281e+06	0	1.64207e+06	1.21404e+06	0	0	0	0	0	0	6.49503e+06	-3.64543	0.000186675	-1.59628
P0DOX5		Immunoglobulin gamma-1 heavy chain OS=Homo sapiens OX=9606 PE=1 SV=2	671	13	449	1764658103	7.30444e+08	2101085414	6.22575e+08	1609268688	1019500273	4392529813	1396438362	3626093159	2023223894	2568210710	3217858127	2515949577	4827689378	3806564853	5630041956	15382946996	3762987748	11456341835	2094793485	1.61504	0.0549337	0.739305
Q05707	COL14A1	Collagen alpha-1(XIV) chain OS=Homo sapiens OX=9606 GN=COL14A1 PE=1 SV=3	666	54	1796	1.91863e+08	1.38993e+08	1911662613	3.50083e+08	3.89034e+08	1.14221e+08	3.08183e+08	6.1303e+08	3.18174e+08	5.41803e+08	4057561361	1278077214	533649174	3512364507	2387504794	335034502	2.42259e+08	9.91269e+08	2.23062e+07	3.56313e+08	1.60585	0.134588	0.523927
P98164	LRP2	Low-density lipoprotein receptor-related protein 2 OS=Homo sapiens OX=9606 GN=LRP2 PE=1 SV=3	639	82	4655	7.09597e+08	1068084051	2.97155e+08	9.17806e+08	6.36242e+08	1027843527	7.17839e+08	3.5081e+08	427922172	681807185	2.51296e+07	1.28823e+07	4.07991e+07	8.70678e+06	114593129	6.66818e+07	1.44611e+08	1.00961e+07	4.21833e+08	6.14233e+08	-2.86337	0.000152719	-1.55288
P04350	TUBB4A	Tubulin beta-4A chain OS=Homo sapiens OX=9606 GN=TUBB4A PE=1 SV=2	636	1	444	2.19154e+07	1.80966e+07	2.73303e+07	1.4086e+07	1.30385e+07	1.35903e+07	1.85289e+07	1.29025e+07	1.7249e+07	2.7723e+07	2.90366e+07	9.59461e+06	6.33197e+06	8.59749e+06	0	3.78164e+06	3.81203e+06	8.53979e+06	4.12954e+07	1.90021e+07	-0.580886	0.278731	-0.336696
P68366	TUBA4A	Tubulin alpha-4A chain OS=Homo sapiens OX=9606 GN=TUBA4A PE=1 SV=1	625	6	448	2.1344e+08	1.72229e+08	181800725	245311518	152606781	2.89096e+08	2.00391e+08	1.8431e+08	1.69809e+08	1.67004e+08	1.35178e+08	1.75115e+08	2.18426e+08	1.42066e+08	2.06678e+08	2.39724e+08	2.06681e+08	1.40089e+08	182705139	213833721	-0.111035	0.512293	-0.194339
P12109	COL6A1	Collagen alpha-1(VI) chain OS=Homo sapiens OX=9606 GN=COL6A1 PE=1 SV=3	605	33	1028	442002141	2.81229e+08	1558704550	7.15461e+08	4.27517e+08	420434481	4.13707e+08	6.09514e+08	5.09656e+08	842567093	1749271843	2361481359	1558214998	1759946471	8.88554e+08	1980572333	7.40971e+08	1429355216	3.67739e+08	1024349440	1.19704	0.00927615	0.842939
P11021	HSPA5	Endoplasmic reticulum chaperone BiP OS=Homo sapiens OX=9606 GN=HSPA5 PE=1 SV=2	595	31	654	5.96249e+08	6.53188e+08	5.96588e+08	7.07867e+08	6.41695e+08	5.60072e+08	5.91591e+08	5.02078e+08	4.73793e+08	4.8573e+08	8.15927e+08	1175217322	1353407770	6.74426e+08	1076871395	1510165669	3312988843	8.86508e+08	9.42933e+08	6.61022e+08	1.16815	0.0499313	0.878617
P07355	ANXA2	Annexin A2 OS=Homo sapiens OX=9606 GN=ANXA2 PE=1 SV=2	592	30	339	5.33256e+08	4.74145e+08	1370897990	742476691	7.61261e+08	5.5238e+08	700942586	6.77982e+08	494323322	5.91391e+08	1255627514	1281500458	1475777457	7.8115e+08	1935887731	1651555804	1851794111	1179290266	1301569930	7.73782e+08	1.03397	0.000568957	1.23323
P08133	ANXA6	Annexin A6 OS=Homo sapiens OX=9606 GN=ANXA6 PE=1 SV=3	592	39	673	4.62048e+08	4.84779e+08	5.01686e+08	5.23207e+08	4.07078e+08	412217496	4.70819e+08	3.78429e+08	3.3142e+08	5.22558e+08	8.64726e+08	1227187771	8.64993e+08	8.27584e+08	7.72268e+08	1004770228	9.50475e+08	6.16474e+08	4.73007e+08	5.3616e+08	0.910207	0.00191285	1.48196
P14625	HSP90B1	Endoplasmin OS=Homo sapiens OX=9606 GN=HSP90B1 PE=1 SV=1	585	31	803	556297647	6.8149e+08	5.50834e+08	6.18427e+08	5.13422e+08	5.1554e+08	5.69039e+08	533703617	4.68138e+08	4.43761e+08	8.90616e+08	1336597496	1221074656	6.63586e+08	1537191756	1115734282	3214201472	9.06596e+08	8.76604e+08	6.68121e+08	1.26166	0.0351758	0.969635
P11142	HSPA8	Heat shock cognate 71 kDa protein OS=Homo sapiens OX=9606 GN=HSPA8 PE=1 SV=1	585	26	646	1477265797	1525950403	1033153173	1096197366	1255069932	1399525617	1154753277	1017877989	862368353	1053602706	916591008	9.80815e+08	1189412023	8.99285e+08	1316098710	1045262858	1439783671	9.14064e+08	1577241130	1169464584	-0.05638	0.732521	-0.102108
A5A3E0	POTEF	POTE ankyrin domain family member F OS=Homo sapiens OX=9606 GN=POTEF PE=1 SV=2	579	2	1075	3.97261e+06	0	5.76559e+06	6.19043e+06	5.475e+06	2.70374e+06	0	2.98521e+06	0	0	1.01647e+07	8.52814e+06	3.99909e+06	0	0	0	0	3.9943e+06	3.73863e+06	0	0.319358	0.711799	0.110219
P10809	HSPD1	60 kDa heat shock protein, mitochondrial OS=Homo sapiens OX=9606 GN=HSPD1 PE=1 SV=2	567	40	573	2443897372	2756683751	5.16459e+08	1996348905	1508299710	2414327478	1816322327	1207447381	1175586640	1626923658	1.73543e+08	2.5419e+08	3.78293e+08	1.42848e+08	1.88468e+08	3.10947e+08	3.15191e+08	1.74393e+08	9.00632e+08	1543873163	-2.46904	0.000409848	-1.64503
P01876	IGHA1	Immunoglobulin heavy constant alpha 1 OS=Homo sapiens OX=9606 GN=IGHA1 PE=1 SV=2	563	17	353	8.74233e+08	1.28732e+08	7.87254e+08	1.29329e+08	636784204	4.93701e+08	1500856897	1850482474	1301765633	5.89354e+08	1921046683	11429905960	8439184868	2111237011	3853246793	6559632974	3415481941	3266579513	9661012834	1419207508	2.7629	0.00904709	1.24776
Q9Y6C2	EMILIN1	EMILIN-1 OS=Homo sapiens OX=9606 GN=EMILIN1 PE=1 SV=3	556	36	1016	1.45743e+08	1.10378e+08	6.90335e+08	4.08034e+08	3.45385e+08	1.52232e+08	2.79853e+08	3.64182e+08	2.8586e+08	2.21493e+08	1414962378	1167645735	7.51147e+08	3158272213	1087866349	5.96892e+08	3.80506e+08	1241404641	2.6561e+08	2.98334e+08	1.89654	0.042839	0.840067
P05023	ATP1A1	Sodium/potassium-transporting ATPase subunit alpha-1 OS=Homo sapiens OX=9606 GN=ATP1A1 PE=1 SV=1	554	29	1023	1830964146	1496454777	8.96541e+08	1913036228	2568315147	2034648190	1901104099	2625215061	1783077991	1539378617	2.75977e+08	3.255e+08	3.06508e+08	2.92259e+08	4.11484e+08	3.4115e+08	3.22907e+08	2.77788e+08	503537143	1781463022	-2.45219	6.12971e-05	-2.76985
P02647	APOA1	Apolipoprotein A-I OS=Homo sapiens OX=9606 GN=APOA1 PE=1 SV=1	552	29	267	1446394844	1307594901	7.88812e+08	1.11324e+08	1686717768	7.82403e+08	1055093375	9.1194e+08	2714994277	1089105258	2071538727	690563252	8.40914e+08	1837431122	1593180345	8.48311e+08	1213828139	1164710257	5.12808e+08	6.02315e+08	0.00918132	0.981374	0.00655766
Q02252	ALDH6A1	Methylmalonate-semialdehyde dehydrogenase [acylating], mitochondrial OS=Homo sapiens OX=9606 GN=ALDH6A1 PE=1 SV=2	550	36	535	4076201650	5214984030	7.58826e+08	2172030955	1808080554	5570127921	2631431870	2642329980	2777513678	3918700942	6.51386e+07	8.54267e+07	1.69483e+07	5.9966e+07	3.23388e+08	3.59418e+08	4.56299e+07	3.9528e+07	5.86732e+08	2966856518	-4.16658	0.000768389	-1.83197
P04264	KRT1	Keratin, type II cytoskeletal 1 OS=Homo sapiens OX=9606 GN=KRT1 PE=1 SV=6	542	33	644	302034175	8.84958e+08	5.14216e+08	2.31412e+08	4.69749e+08	1990550177	5.4332e+08	8.958e+08	4.46476e+08	4.36726e+08	1372694971	2.54041e+08	4.07656e+08	5.0652e+08	4.96654e+08	1516490298	3.9252e+08	6.15177e+08	9.92455e+08	2.84125e+08	0.116985	0.838211	0.0619958
P01860	IGHG3	Immunoglobulin heavy constant gamma 3 OS=Homo sapiens OX=9606 GN=IGHG3 PE=1 SV=2	541	7	377	299194472	187769564	3.27782e+08	7.55481e+07	3.2052e+08	3.35965e+08	3.64278e+08	1.36405e+08	2271240723	5.58698e+08	1227631237	1439337825	5.04748e+08	1713008600	3.4784e+08	3734956784	2889745784	1100894802	3266386263	2.4171e+08	1.886	0.0286654	0.749659
P0DMV9	HSPA1B	Heat shock 70 kDa protein 1B OS=Homo sapiens OX=9606 GN=HSPA1B PE=1 SV=1	534	24	641	6.87495e+08	6.78931e+08	7.12968e+08	6.28737e+08	6.79117e+08	7.06859e+08	6.40884e+08	524778641	5.27724e+08	5.57672e+08	8.26672e+08	5.56517e+08	5.90311e+08	6.96383e+08	5.44032e+08	7.23787e+08	4.8188e+08	4.14317e+08	7.50122e+08	5.25091e+08	-0.0323505	0.825194	-0.071293
P67936	TPM4	Tropomyosin alpha-4 chain OS=Homo sapiens OX=9606 GN=TPM4 PE=1 SV=3	532	14	248	6.1614e+08	5.20155e+08	9.94253e+08	8.65679e+08	7.44687e+08	5.90605e+08	7.5349e+08	8.21666e+08	751875240	1279272545	2012087285	1780529561	9.12494e+08	1251503745	1851082511	9.21468e+08	1300136003	1520972674	7.84441e+08	7.84359e+08	0.787912	0.012099	0.913651
Q9BYX7	POTEKP	Putative beta-actin-like protein 3 OS=Homo sapiens OX=9606 GN=POTEKP PE=5 SV=1	532	4	375	1.17501e+08	1.53231e+08	4.67831e+08	1.86804e+08	1.31875e+08	1.97612e+08	1.07717e+08	2.32417e+08	1.54929e+08	8.92347e+07	4.30178e+07	1.87963e+08	2.66426e+08	1.31975e+08	4.01055e+08	6.60086e+08	3.61104e+08	3.24468e+08	5.84118e+07	7.63267e+07	0.556591	0.31268	0.301956
P08238	HSP90AB1	Heat shock protein HSP 90-beta OS=Homo sapiens OX=9606 GN=HSP90AB1 PE=1 SV=4	531	18	724	1.92365e+08	1.60578e+08	2.05984e+08	193341759	1.64802e+08	1.93277e+08	1.85095e+08	1.56221e+08	1.66465e+08	1.55023e+08	2.55531e+08	2.62076e+08	2.71302e+08	2.91036e+08	2.79675e+08	2.73275e+08	2.67713e+08	2.80681e+08	3.0905e+08	2.18172e+08	0.642028	5.22598e-07	3.03151
P00558	PGK1	Phosphoglycerate kinase 1 OS=Homo sapiens OX=9606 GN=PGK1 PE=1 SV=3	527	31	417	1451089064	1777045966	8.22053e+08	1177882154	1078982069	1295960757	1371427851	1093806739	1007961179	1302646756	670685307	7.06135e+08	1061265287	5.77865e+08	6.02329e+08	8.77305e+08	9.86552e+08	6.19374e+08	1152304777	1322927800	-0.619063	0.00423476	-0.943649
P24821	TNC	Tenascin OS=Homo sapiens OX=9606 GN=TNC PE=1 SV=3	525	58	2201	4.83159e+07	5.46571e+07	1223634520	2.57721e+08	4.65367e+08	3.2638e+07	1.36478e+08	4.12296e+08	1.34526e+08	1.29502e+08	1286600473	5.62245e+08	7.28669e+08	1922390416	2013452663	5.27689e+08	1.09064e+08	2782139443	158094647	2.68328e+08	1.95328	0.0570465	0.679479
P60174	TPI1	Triosephosphate isomerase OS=Homo sapiens OX=9606 GN=TPI1 PE=1 SV=3	521	22	286	1935414803	2674514756	1485475730	1376040790	1823958972	1731618700	1652288588	1261587984	1249185957	1545511212	1080155118	9.66431e+08	1348504445	8.17425e+08	7.53515e+08	7.95871e+08	1094315489	809513490	1505818784	1471438840	-0.71568	0.0031907	-1.00944
P58876	H2BC5	Histone H2B type 1-D OS=Homo sapiens OX=9606 GN=HIST1H2BD PE=1 SV=2	516	0	126	856999	1.29489e+07	0	0	1.07154e+06	5.08236e+06	0	2.66435e+06	1.19737e+06	939625	1.90769e+07	3.85289e+06	3.14818e+07	4.94777e+06	350952	913898	7.35247e+06	2.34946e+06	4.43135e+06	6.95903e+06	1.74614	0.202148	0.431022
O60814	H2BC12	Histone H2B type 1-K OS=Homo sapiens OX=9606 GN=H2BC12 PE=1 SV=3	513	1	126	2641254306	2360917001	4628808770	2641790188	3086618565	4186485817	2256018669	3213755572	2654906431	1989934016	3414453749	5433701520	5888371304	4478051227	6351775692	4978019778	6578392213	3774341187	1957042804	3643980491	0.682896	0.0123466	0.804799
P01859	IGHG2	Immunoglobulin heavy constant gamma 2 OS=Homo sapiens OX=9606 GN=IGHG2 PE=1 SV=2	504	10	326	1.37693e+08	7.05513e+07	1.25937e+08	2.12957e+07	1.48371e+08	8.75418e+07	1.60802e+08	1.19465e+08	1235749419	2.88615e+08	3.78755e+08	1.53186e+08	3.93886e+08	664250854	1.90024e+08	2304450963	1424366123	5.64295e+08	1140043093	1.38844e+08	1.74201	0.0889052	0.560074
P07900	HSP90AA1	Heat shock protein HSP 90-alpha OS=Homo sapiens OX=9606 GN=HSP90AA1 PE=1 SV=5	500	22	732	1038444326	1144032689	7.13267e+08	8.8132e+08	709448441	9.30498e+08	7.40192e+08	6.95893e+08	6.34378e+08	7.42062e+08	6.80765e+08	7.23616e+08	1000008468	7.03062e+08	7.9399e+08	7.56505e+08	1006989179	7.42445e+08	1080686225	8.17957e+08	0.0157855	0.922139	0.0298102
P01834	IGKC	Immunoglobulin kappa constant OS=Homo sapiens OX=9606 GN=IGKC PE=1 SV=2	497	2	107	6.60698e+08	1.79633e+08	885832860	1.84492e+08	7.25391e+08	7.54429e+08	1022710725	6.28642e+08	2343315666	9.81474e+08	1125846625	2516845802	2892851174	1645024616	2207166593	11546452162	4630922458	2116970300	5003728129	7.70151e+08	2.16143	0.0501003	0.810327
Q16778	H2BC21	Histone H2B type 2-E OS=Homo sapiens OX=9606 GN=HIST2H2BE PE=1 SV=3	497	2	126	3.04751e+07	2.37436e+07	6.25635e+07	3.3108e+07	2.3575e+07	2.24091e+07	6.06087e+07	6.54564e+07	4.79688e+07	3.3198e+07	1.56376e+08	8.89596e+07	9.50145e+07	8.00899e+07	9.31696e+07	2.34979e+07	17231349	9.5473e+07	4.55993e+07	4.46178e+07	0.93871	0.0440673	0.649515
P14543	NID1	Nidogen-1 OS=Homo sapiens OX=9606 GN=NID1 PE=1 SV=3	494	31	1247	2.94932e+08	224280688	8.10677e+08	3.8258e+08	2.0288e+08	3.62204e+08	3.63449e+08	3.78724e+08	3.73937e+08	2.55394e+08	5.43563e+08	7.40927e+08	5.34759e+08	7.00251e+08	4.0903e+08	1.03929e+08	7.83856e+07	6.47499e+08	3.39789e+08	3.55949e+08	0.319445	0.434309	0.23111
Q562R1	ACTBL2	Beta-actin-like protein 2 OS=Homo sapiens OX=9606 GN=ACTBL2 PE=1 SV=2	488	3	376	1.27042e+07	0	1.35632e+07	1.06073e+07	5.12846e+06	2.60022e+07	0	1.08657e+07	1.05265e+07	1.57424e+07	0	2.55367e+07	2.56588e+07	1.32811e+07	7.72469e+07	4.17661e+07	2.94087e+07	1.01146e+07	0	12212854	1.23682	0.177475	0.475583
P05062	ALDOB	Fructose-bisphosphate aldolase B OS=Homo sapiens OX=9606 GN=ALDOB PE=1 SV=2	488	28	364	6847129946	6466446736	8.48804e+08	2363089878	1983418871	5236581154	3720608003	1444494210	1746822391	3764868327	1.90579e+08	2.40069e+07	716808	2.07818e+07	2.54083e+07	1.00857e+07	1.29224e+06	5.69607e+07	1906088133	2756397454	-3.7924	0.00325022	-1.22174
Q03154	ACY1	Aminoacylase-1 OS=Homo sapiens OX=9606 GN=ACY1 PE=1 SV=1	485	30	408	3114432044	5669001621	6.25152e+08	2404992460	2593417226	5128303164	2501493232	4303739430	3475378896	4390886298	8.64732e+07	3.17244e+07	1.8661e+07	2.66172e+07	1.68735e+07	1.60131e+07	1.0641e+07	1.30592e+07	5.32317e+08	2963974432	-5.35467	0.00039089	-2.11185
P01009	SERPINA1	Alpha-1-antitrypsin OS=Homo sapiens OX=9606 GN=SERPINA1 PE=1 SV=3	483	30	418	1002557559	5.1288e+08	6.73963e+08	3.65709e+08	1448955382	3.61195e+08	8.45584e+08	4.98305e+08	2472798572	4.83132e+08	1280941300	7.66667e+08	7.38846e+08	1172862764	8.89928e+08	1398687946	1495904549	3241197307	2459365783	3.18383e+08	0.785724	0.133399	0.443992
P22626	HNRNPA2B1	Heterogeneous nuclear ribonucleoproteins A2/B1 OS=Homo sapiens OX=9606 GN=HNRNPA2B1 PE=1 SV=2	482	21	353	6.025e+08	6.54172e+08	7.9402e+08	5.16391e+08	5.45393e+08	563174683	5.21922e+08	5.60097e+08	4.59641e+08	4.61232e+08	6.65498e+08	7.85069e+08	9.59865e+08	7.54787e+08	8.6435e+08	5.27201e+08	8.81633e+08	7.06537e+08	6.23913e+08	6.06595e+08	0.405394	0.00945838	0.825726
P55072	VCP	Transitional endoplasmic reticulum ATPase OS=Homo sapiens OX=9606 GN=VCP PE=1 SV=4	481	37	806	3.63066e+08	3.55738e+08	3.1439e+08	3.46264e+08	3.04238e+08	3.27421e+08	3.40446e+08	2.77398e+08	2.62931e+08	3.20436e+08	3.15329e+08	5.07317e+08	6.39277e+08	3.79771e+08	4.24149e+08	5.25091e+08	6.10643e+08	3.55021e+08	4.63414e+08	3.69444e+08	0.545631	0.0103274	1.08101
P12110	COL6A2	Collagen alpha-2(VI) chain OS=Homo sapiens OX=9606 GN=COL6A2 PE=1 SV=4	477	31	1019	441841908	2.20855e+08	1278022881	5.74184e+08	3.46132e+08	3.40314e+08	3.66445e+08	4.67232e+08	5.1232e+08	7.44534e+08	1750781696	2273816309	1048540371	1726168599	9.19438e+08	1507370627	583999650	1284694717	3.11958e+08	9.60746e+08	1.26004	0.0174523	0.850156
P08727	KRT19	Keratin, type I cytoskeletal 19 OS=Homo sapiens OX=9606 GN=KRT19 PE=1 SV=4	477	23	400	7.33347e+08	5.63345e+08	9.84004e+08	5.84695e+08	1049418753	9.00818e+08	6.19471e+08	1025649803	8.27271e+08	4.75442e+08	1103031106	9.95845e+08	8.54947e+08	8.88981e+08	979462686	1.9774e+08	6.24278e+07	9.90061e+08	5.9857e+08	4.90308e+08	-0.0667796	0.837456	-0.0635117
P15311	EZR	Ezrin OS=Homo sapiens OX=9606 GN=EZR PE=1 SV=4	472	19	586	3.87463e+08	5.69429e+08	2.537e+08	4.18253e+08	454454866	4.4168e+08	3.51301e+08	3.89382e+08	3.53294e+08	3.58073e+08	9.75288e+07	1.84751e+08	2.08598e+08	9.69703e+07	9.24652e+07	9.22905e+07	1.27561e+08	1.38794e+08	2.55054e+08	3.33198e+08	-1.46784	1.9539e-05	-1.88828
Q99798	ACO2	Aconitate hydratase, mitochondrial OS=Homo sapiens OX=9606 GN=ACO2 PE=1 SV=2	472	35	780	1045555129	9.00319e+08	2.79794e+08	631672048	7.25175e+08	1193468771	1098886601	7.99281e+08	6.12926e+08	9.25627e+08	1.2334e+08	1.51782e+08	9.46585e+07	5.6416e+07	9.94913e+07	1.05657e+08	1.26125e+08	8.35351e+07	3.9612e+08	8.68779e+08	-2.57886	0.000106041	-1.93757
Q13509	TUBB3	Tubulin beta-3 chain OS=Homo sapiens OX=9606 GN=TUBB3 PE=1 SV=2	470	1	450	2.29936e+06	2.04366e+06	1.84186e+07	7.08818e+06	6.30759e+06	3.14173e+06	2.52759e+06	4.94894e+06	5.54425e+06	3.37709e+06	1.53317e+07	1.31324e+07	7.05572e+06	1.46455e+07	1.54088e+07	1.2888e+07	1.27911e+07	2.53116e+07	9.57599e+06	5648582	1.33137	0.00525767	0.903156
P00367	GLUD1	Glutamate dehydrogenase 1, mitochondrial OS=Homo sapiens OX=9606 GN=GLUD1 PE=1 SV=2	469	29	558	1233055585	1401512960	431025091	7.17938e+08	7.1452e+08	1279434682	994975082	1090330734	7.45674e+08	1297190122	1.48313e+08	1.78421e+08	182615464	133910973	5.80802e+07	1.21378e+08	119716927	1.44458e+08	4.36839e+08	1210228358	-2.54864	0.000107208	-2.01742
O60494	CUBN	Cubilin OS=Homo sapiens OX=9606 GN=CUBN PE=1 SV=5	464	56	3623	6.42886e+08	7.61075e+08	2.29111e+08	4.00186e+08	4.62801e+08	7.40288e+08	5.62798e+08	3.03785e+08	3.98395e+08	6.41393e+08	4.22107e+07	4.95466e+07	6.33652e+07	5.21983e+07	2.57672e+08	1.23486e+08	1.15783e+08	4.9989e+07	1.1989e+08	4.89071e+08	-2.40459	0.0002155	-1.74765
P07951	TPM2	Tropomyosin beta chain OS=Homo sapiens OX=9606 GN=TPM2 PE=1 SV=1	457	9	284	6.13031e+07	4.856e+07	1.43855e+08	1.27258e+08	8.34597e+07	4.63509e+07	7.11685e+07	8.28168e+07	1.22276e+08	291654094	5.57289e+08	2.96076e+08	6.88643e+07	1.78851e+08	169431902	9.2982e+07	1.95025e+08	3.40067e+08	6.10702e+07	8.11762e+07	1.01331	0.10712	0.501094
P02671	FGA	Fibrinogen alpha chain OS=Homo sapiens OX=9606 GN=FGA PE=1 SV=2	454	32	866	3.51055e+08	2.54328e+08	4.9843e+08	1.94087e+08	1240624048	3.03753e+08	4.00602e+08	2.74773e+08	1339371324	4.6266e+08	8.56737e+08	3.75073e+08	4.32877e+08	1522105284	7.22033e+08	5815178002	1760567236	1475987780	7.82986e+08	1.91359e+08	1.52134	0.134639	0.5038
Q16822	PCK2	Phosphoenolpyruvate carboxykinase [GTP], mitochondrial OS=Homo sapiens OX=9606 GN=PCK2 PE=1 SV=4	452	30	640	2922344564	3598829266	5.67257e+08	1270417259	1955254138	3878292343	2012268522	1130530555	1205864696	2599068301	2.75237e+07	6.43329e+07	3.31185e+07	3.26675e+07	1.10213e+07	5.4137e+07	6.89756e+07	1.73448e+07	2.09455e+08	1452114929	-5.19728	0.00110851	-1.84882
Q05682	CALD1	Caldesmon OS=Homo sapiens OX=9606 GN=CALD1 PE=1 SV=3	451	28	793	1.5311e+08	147585537	3.14291e+08	2.72311e+08	2.31713e+08	1.11439e+08	2.07999e+08	245102417	2.31147e+08	4.0304e+08	7.56987e+08	6.90612e+08	2.83379e+08	3.93951e+08	2.81173e+08	1.13135e+08	4.04317e+08	5.90543e+08	1.71948e+08	218129946	0.821359	0.0859606	0.603259
P09493	TPM1	Tropomyosin alpha-1 chain OS=Homo sapiens OX=9606 GN=TPM1 PE=1 SV=2	450	10	284	7.75819e+07	5.98018e+07	1.06684e+08	9.02458e+07	4.90409e+07	4.56149e+07	7.24604e+07	8.95517e+07	1.24719e+08	2.63088e+08	5.37981e+08	2.70371e+08	4.39328e+07	1.50263e+08	8.305e+07	5.48166e+07	8.14541e+07	3.08657e+08	7.57816e+07	9.08191e+07	0.866682	0.26627	0.374072
P62979	RPS27A	Ubiquitin-40S ribosomal protein S27a OS=Homo sapiens OX=9606 GN=RPS27A PE=1 SV=2	447	10	156	1166240292	1630917372	1181062704	1073070054	1189143119	1182065332	8.163e+08	1011757827	8.48728e+08	7.68749e+08	9.77022e+08	1478580947	2239867655	1011963635	1400559164	7.88592e+08	1435542781	8.90192e+08	1061740516	1031987724	0.206198	0.397391	0.253144
P05091	ALDH2	Aldehyde dehydrogenase, mitochondrial OS=Homo sapiens OX=9606 GN=ALDH2 PE=1 SV=2	442	28	517	2502013918	2798170910	534892225	1490103725	1226955930	3201813440	1677700797	1382951182	1183086610	1681854423	151537804	2.07859e+08	2.06598e+08	1.36741e+08	1.89879e+08	1.82882e+08	2.92188e+08	8.96552e+07	453239492	1770945756	-3.058	0.000920931	-1.77157
P0C0L5	C4B	Complement C4-B OS=Homo sapiens OX=9606 GN=C4B PE=1 SV=2	438	3	1744	2.86437e+08	7.38511e+07	1.23146e+08	6.37903e+07	4.66875e+08	1.91472e+08	4.05334e+08	1.76216e+08	1501463399	3.83273e+08	5.98332e+08	4.80404e+08	3.20156e+08	9.00501e+08	6.03495e+08	7.095e+08	4.96474e+08	6.53759e+08	1.81547e+08	9.97762e+07	0.581221	0.332907	0.302919
P00352	ALDH1A1	Retinal dehydrogenase 1 OS=Homo sapiens OX=9606 GN=ALDH1A1 PE=1 SV=2	437	23	501	1061885259	1033555861	5.99431e+08	7.31308e+08	8.90674e+08	9.15307e+08	7.01822e+08	9.10161e+08	6.82292e+08	9.21642e+08	4.45529e+08	2.86265e+08	226846638	3.08432e+08	2.63558e+08	7.28976e+07	220348923	2.07477e+08	4.73282e+08	846626570	-1.60202	5.72763e-06	-2.14621
P15144	ANPEP	Aminopeptidase N OS=Homo sapiens OX=9606 GN=ANPEP PE=1 SV=4	437	39	967	1226550869	1998468962	310479797	1230961024	8.87347e+08	1356127933	9.94952e+08	4.30159e+08	7.85089e+08	1046774918	2.3677e+07	2.13088e+07	4.21878e+07	1.59685e+07	7.97191e+07	1.63893e+08	8.3935e+07	3.16571e+07	8.26449e+08	5.96239e+08	-2.8419	0.000747578	-1.25866
Q14697	GANAB	Neutral alpha-glucosidase AB OS=Homo sapiens OX=9606 GN=GANAB PE=1 SV=3	436	32	944	2.39049e+08	2.55965e+08	3.30269e+08	2.44451e+08	1.97198e+08	2.575e+08	1.89719e+08	261438004	2.16714e+08	2.20393e+08	3.05375e+08	4.72415e+08	3.67194e+08	6.8509e+08	3.87284e+08	5.04045e+08	5.11508e+08	3.05564e+08	1.95747e+08	261475150	0.782164	0.0164509	0.992819
P11047	LAMC1	Laminin subunit gamma-1 OS=Homo sapiens OX=9606 GN=LAMC1 PE=1 SV=3	435	36	1609	2.25549e+08	1.74561e+08	5.76184e+08	3.20893e+08	1.59796e+08	2.25303e+08	3.11241e+08	3.07899e+08	2.6239e+08	225834371	498013096	580819984	4.31035e+08	544184109	3.18218e+08	7.72404e+07	7.79477e+07	5.63778e+08	2.62644e+08	3.02062e+08	0.41775	0.31268	0.312232
P0C0L4	C4A	Complement C4-A OS=Homo sapiens OX=9606 GN=C4A PE=1 SV=2	433	2	1744	8.0143e+06	0	1.45194e+06	1.59077e+06	8.8789e+06	8.99167e+06	9.25517e+06	0	4.03575e+07	4.92882e+06	1.00888e+07	1.06186e+07	1.54941e+07	9.6971e+06	0	2.80634e+06	5.09811e+06	1.49188e+07	0	0	-0.128468	0.896629	-0.042197
P08572	COL4A2	Collagen alpha-2(IV) chain OS=Homo sapiens OX=9606 GN=COL4A2 PE=1 SV=4	433	17	1712	1727448603	1270075861	2037377971	1663491795	1881015884	1507898043	1924692271	2433438941	1712905112	9.18912e+08	8.05485e+08	1631903816	1190291071	9.50692e+08	7.11167e+08	1.04319e+08	1.23974e+08	1632930011	1463495599	1626776264	-0.835275	0.0120473	-0.792949
P01023	A2M	Alpha-2-macroglobulin OS=Homo sapiens OX=9606 GN=A2M PE=1 SV=3	430	43	1474	8.30158e+07	6.64668e+07	5.75383e+08	4.42917e+07	5.51713e+08	4.11969e+08	5.68168e+08	126622581	5.97871e+08	1.59056e+08	617638238	1.26882e+08	1.92592e+08	1671712359	4.68268e+08	6.40201e+08	4.55939e+08	7.66339e+08	6.60698e+08	1.14585e+08	0.966406	0.125697	0.466187
P22314	UBA1	Ubiquitin-like modifier-activating enzyme 1 OS=Homo sapiens OX=9606 GN=UBA1 PE=1 SV=3	429	29	1058	3.94694e+08	3.84641e+08	4.1981e+08	3.20093e+08	4.22582e+08	4.12901e+08	3.66865e+08	3.05162e+08	3.08077e+08	2.91881e+08	2.91804e+08	3.8072e+08	4.59211e+08	2.90756e+08	3.19773e+08	387423727	3.5817e+08	2.30543e+08	3.42228e+08	4.03241e+08	-0.0928276	0.494934	-0.201987
P05783	KRT18	Keratin, type I cytoskeletal 18 OS=Homo sapiens OX=9606 GN=KRT18 PE=1 SV=2	429	25	430	1083343201	8.38662e+08	9.44852e+08	9.08547e+08	7.72989e+08	9.7474e+08	8.36411e+08	763163283	6.93716e+08	6.43957e+08	4.66186e+08	5.62747e+08	6.70122e+08	3.72791e+08	5.34564e+08	1.28389e+08	130842608	570383885	1869804565	1047828075	-0.521141	0.207443	-0.417282
P02788	LTF	Lactotransferrin OS=Homo sapiens OX=9606 GN=LTF PE=1 SV=6	425	50	710	6.82767e+07	2.28693e+07	2.0124e+08	4.38582e+07	114920655	6.54309e+07	4.28234e+07	4.19605e+07	4.76009e+07	3.05092e+07	1.02276e+08	1941768114	3038296279	1190411970	3764485676	9921051154	3610050413	1216293741	8.73171e+08	9.22892e+07	5.3908	0.0428512	0.985908
Q06830	PRDX1	Peroxiredoxin-1 OS=Homo sapiens OX=9606 GN=PRDX1 PE=1 SV=1	424	16	199	1887925056	2387558787	9.94697e+08	1411118368	1261903068	2225697005	1460434456	1232842140	1088890566	1290238977	7.07907e+08	8.73279e+08	9.78935e+08	6.19751e+08	1166132044	1410518604	1452020081	7.29663e+08	1512156125	1463243663	-0.537542	0.049185	-0.607058
P48735	IDH2	Isocitrate dehydrogenase [NADP], mitochondrial OS=Homo sapiens OX=9606 GN=IDH2 PE=1 SV=2	417	23	452	1058248843	1148449124	437849468	8.86788e+08	1921683025	1033087293	1288263459	1346677177	1051811749	1089653207	1.77411e+08	1.59198e+08	1.8423e+08	9.92442e+07	2.03068e+08	1.45106e+08	2.15823e+08	116663726	3.87139e+08	1319409102	-2.58624	2.5576e-05	-2.1626
P04792	HSPB1	Heat shock protein beta-1 OS=Homo sapiens OX=9606 GN=HSPB1 PE=1 SV=2	412	16	205	1742409045	1925299447	1059327100	1356784246	1393584714	1821472328	1272771432	1181659687	1112318110	1556695867	1362690266	1011981499	6.8864e+08	7.2269e+08	9.57532e+08	4.46602e+08	6.2913e+08	8.19635e+08	1843034038	1224657091	-0.613835	0.0201473	-0.720592
P38646	HSPA9	Stress-70 protein, mitochondrial OS=Homo sapiens OX=9606 GN=HSPA9 PE=1 SV=2	408	34	679	1223947056	1178650579	3.11189e+08	7.85014e+08	6.52489e+08	1299435337	9.49511e+08	7.1155e+08	6.05929e+08	8.63651e+08	1.53747e+08	1.71639e+08	2.00675e+08	1.18136e+08	1.65481e+08	2.47503e+08	2.19086e+08	1.57312e+08	4.63658e+08	8.20159e+08	-2.02531	0.000427354	-1.65269
P29401	TKT	Transketolase OS=Homo sapiens OX=9606 GN=TKT PE=1 SV=3	406	23	623	4.12638e+08	3.57141e+08	3.8786e+08	3.81945e+08	3.4369e+08	4.63129e+08	2.97621e+08	2.47172e+08	2.39648e+08	2.71853e+08	3.33507e+08	4.63694e+08	556057544	3.49339e+08	4.99554e+08	7.32564e+08	8.01679e+08	3.36206e+08	6.81215e+08	4.82019e+08	0.634411	0.0293546	0.78914
P02675	FGB	Fibrinogen beta chain OS=Homo sapiens OX=9606 GN=FGB PE=1 SV=2	405	31	491	1.85048e+08	9.32928e+07	2.68202e+08	4.99399e+07	8.20985e+08	1.60967e+08	3.42726e+08	1.70889e+08	1047745539	3.23454e+08	7.07375e+08	3.2556e+08	3.27888e+08	9.85915e+08	6.7165e+08	5333887240	1560766131	1168403680	6.07967e+08	1.45445e+08	1.90701	0.122455	0.533382
O00468	AGRN	Agrin OS=Homo sapiens OX=9606 GN=AGRN PE=1 SV=6	403	39	2068	1.71424e+08	1.54483e+08	4.67604e+08	2.12859e+08	1.17926e+08	2.49136e+08	2.54182e+08	303577549	2.37486e+08	1.52377e+08	2.28379e+08	3.27203e+08	2.334e+08	3.2479e+08	2.32548e+08	1.21117e+08	6.88246e+07	3.72633e+08	2.21927e+08	2.46242e+08	0.0286321	0.934814	0.024829
P11498	PC	Pyruvate carboxylase, mitochondrial OS=Homo sapiens OX=9606 GN=PC PE=1 SV=2	403	39	1178	5.96445e+08	6.18328e+08	1.37607e+08	5.04165e+08	3.6903e+08	8.43909e+08	485566830	3.69613e+08	3.82452e+08	6.1096e+08	1.58877e+07	1.29085e+07	1.09759e+07	2.12007e+06	4.56287e+07	1.02473e+07	2.33842e+07	7.58361e+06	1.34394e+08	5.28464e+08	-4.07225	0.000209776	-2.08898
P08123	COL1A2	Collagen alpha-2(I) chain OS=Homo sapiens OX=9606 GN=COL1A2 PE=1 SV=7	401	15	1366	1550739978	1974042036	6461895680	3723912086	4440710742	1051064807	2392820007	3453053725	2304694817	3795954147	10301653814	3880641433	1650847418	8251534833	4011591897	4014116578	6054294820	6180476025	1630854527	2124150002	0.713704	0.122455	0.469617
Q01995	TAGLN	Transgelin OS=Homo sapiens OX=9606 GN=TAGLN PE=1 SV=4	399	19	201	7.0768e+08	5.72438e+08	1075345626	1188895397	8.04979e+08	2.94189e+08	4.12773e+08	6.75076e+08	1028913402	3050524380	3827054586	1945286260	5.85424e+08	1065856105	9.63645e+08	8.19384e+08	1536731578	2509358641	4.63106e+08	6.6728e+08	0.635402	0.296053	0.307109
P46940	IQGAP1	Ras GTPase-activating-like protein IQGAP1 OS=Homo sapiens OX=9606 GN=IQGAP1 PE=1 SV=1	397	43	1657	1.32439e+08	9.9946e+07	2.15595e+08	1.58233e+08	1.3377e+08	9.88425e+07	1.38262e+08	1.62579e+08	1.30365e+08	1.12981e+08	2.78912e+08	3.77175e+08	5.51736e+08	330923019	4.31656e+08	5.83086e+08	519547980	3.31025e+08	3.07864e+08	1.99602e+08	1.57636	0.000397748	1.95673
P06396	GSN	Gelsolin OS=Homo sapiens OX=9606 GN=GSN PE=1 SV=1	396	29	782	4.86196e+08	4.6984e+08	5.11289e+08	4.65008e+08	3.92931e+08	7.01457e+08	4.85276e+08	3.72562e+08	3.65958e+08	5.30563e+08	966052983	6.24869e+08	9.00297e+08	9.49317e+08	9.91448e+08	1334369384	7.81376e+08	7.18426e+08	5.95308e+08	416453494	0.869465	0.00219266	1.29013
P55268	LAMB2	Laminin subunit beta-2 OS=Homo sapiens OX=9606 GN=LAMB2 PE=1 SV=2	394	44	1798	2868116259	3236896889	3795190236	4222772176	3983597217	3975565011	2633616908	3081963937	2398718425	3427633508	3861476015	3698971701	5974718642	3292794449	5532726209	3974024738	5229129668	4338355178	2719610262	2880115139	0.351924	0.0596311	0.576686
P68104	EEF1A1	Elongation factor 1-alpha 1 OS=Homo sapiens OX=9606 GN=EEF1A1 PE=1 SV=1	389	17	462	1617458162	1414455983	1209330675	1406567629	958478158	1379497034	1414780318	1248218663	1061657964	1249097768	1005247739	1311746410	1395728837	9.5864e+08	1397382720	1071973514	1554030289	1206035017	1665453981	1444388249	-0.012092	0.931018	-0.0262031
P13645	KRT10	Keratin, type I cytoskeletal 10 OS=Homo sapiens OX=9606 GN=KRT10 PE=1 SV=6	386	23	584	146033390	2597175045	2.51423e+08	1047260533	2.56003e+08	771968895	3.00148e+08	7.04111e+08	3.52589e+08	2.40982e+08	6.53346e+08	2.05859e+08	2.50101e+08	3.26505e+08	414543469	1127105764	3.11759e+08	5.01377e+08	6.96311e+08	1.93181e+08	-0.419463	0.60202	-0.172531
P30101	PDIA3	Protein disulfide-isomerase A3 OS=Homo sapiens OX=9606 GN=PDIA3 PE=1 SV=4	385	25	505	3.61787e+08	4.04516e+08	4.23942e+08	4.28848e+08	4.61294e+08	3.06888e+08	3.90873e+08	3.51221e+08	2.85841e+08	2.83321e+08	5.48353e+08	6.0469e+08	7.86616e+08	537543095	6.2779e+08	7.38834e+08	1065999219	4.33312e+08	4.72449e+08	347753866	0.804975	0.00713935	1.13679
P40939	HADHA	Trifunctional enzyme subunit alpha, mitochondrial OS=Homo sapiens OX=9606 GN=HADHA PE=1 SV=2	385	33	763	7.03418e+08	6.39267e+08	227450029	5.40858e+08	4.95029e+08	6.66271e+08	5.90281e+08	5.91651e+08	4.65463e+08	5.35276e+08	1.45955e+08	1.38497e+08	1.82399e+08	8.35912e+07	8.33579e+07	1.13606e+08	1.55432e+08	1.08751e+08	4.27518e+08	5.47078e+08	-1.77039	4.31948e-05	-1.69772
P02679	FGG	Fibrinogen gamma chain OS=Homo sapiens OX=9606 GN=FGG PE=1 SV=3	373	18	453	267719254	1.77949e+08	3.78079e+08	8.84975e+07	8.52896e+08	2.07991e+08	3.81839e+08	2.65732e+08	1245993175	4.07656e+08	9.60294e+08	4.12886e+08	3.87825e+08	1126930432	7.70789e+08	4380950396	1449514282	1497006521	6.70713e+08	1.90747e+08	1.59941	0.0797445	0.582017
P17661	DES	Desmin OS=Homo sapiens OX=9606 GN=DES PE=1 SV=3	369	32	470	3.59241e+07	1.06394e+08	3.01413e+08	1.04737e+08	1.8121e+08	1.07346e+08	3.04714e+07	4.62315e+07	7.89605e+07	4.17086e+08	2420097198	3.90907e+08	2.38062e+08	7.17627e+08	1117607671	5.3587e+08	377621750	1148277215	5.90028e+07	5.33602e+07	2.46494	0.0541497	0.799594
P24752	ACAT1	Acetyl-CoA acetyltransferase, mitochondrial OS=Homo sapiens OX=9606 GN=ACAT1 PE=1 SV=1	369	26	427	2154615556	2155829306	3.66701e+08	1387290841	1521254685	2503208834	1998885628	1403901202	1871966984	2138688847	7.1109e+07	9.23954e+07	4.85384e+07	4.75031e+07	1.83549e+08	7.20868e+07	1.62293e+08	6.18645e+07	3.63465e+08	1260587865	-3.8363	0.00011678	-2.41233
P0DOX7		Immunoglobulin kappa light chain OS=Homo sapiens OX=9606 PE=1 SV=1	368	3	214	3.9268e+08	1.58807e+08	5.01703e+08	6.84411e+07	4.98348e+08	2.53844e+08	6.78318e+08	3.27999e+08	1571713928	5.12062e+08	1204910656	1886752734	2364662959	9.88992e+08	1872156933	5005949048	3979936621	1840690843	4089275759	4.96001e+08	2.37865	0.00601732	1.20081
Q14204	DYNC1H1	Cytoplasmic dynein 1 heavy chain 1 OS=Homo sapiens OX=9606 GN=DYNC1H1 PE=1 SV=5	366	56	4646	1.98228e+08	1.72828e+08	2.13203e+08	2.20859e+08	1.95845e+08	1.81729e+08	1.80602e+08	1.4193e+08	1.60282e+08	1.94329e+08	1.26599e+08	1.92597e+08	1.62948e+08	1.70726e+08	1.39065e+08	1.52261e+08	1.68354e+08	1.56647e+08	1.83806e+08	2.05725e+08	-0.204135	0.0541002	-0.582971
Q68CK6	ACSM2B	Acyl-coenzyme A synthetase ACSM2B, mitochondrial OS=Homo sapiens OX=9606 GN=ACSM2B PE=1 SV=2	360	9	577	2041967573	1758098453	3.61368e+08	1174361464	9.02518e+08	2489678462	1919137230	3.6842e+08	1721581972	1900170432	1.77337e+08	1.50918e+08	1.41684e+08	4.26152e+08	1.46261e+08	1527093344	5.85963e+08	2.49741e+08	7.76701e+08	1339828993	-1.65543	0.00719293	-0.891442
Q14764	MVP	Major vault protein OS=Homo sapiens OX=9606 GN=MVP PE=1 SV=4	357	32	893	3.14868e+08	8.13452e+07	1.43093e+08	229417539	1.48937e+08	1.95224e+08	1.7255e+08	1.43749e+08	2.08094e+08	2.48618e+08	105099272	2.00765e+08	2.71036e+08	1.2528e+08	2.66937e+08	4.60162e+08	3.11033e+08	1.6746e+08	4.80472e+08	2.00263e+08	0.492703	0.183791	0.404913
Q99878	H2AC14	Histone H2A type 1-J OS=Homo sapiens OX=9606 GN=H2AC14 PE=1 SV=3	356	2	128	3.02615e+07	2.10163e+07	7.7418e+07	2.02013e+07	1.68899e+07	1.90995e+07	4.61312e+07	3.74918e+07	4.33583e+07	4.59046e+07	2.9923e+08	2.06914e+08	1.37842e+08	2.00833e+08	1.56575e+08	1.27622e+08	7.82168e+07	1.23862e+08	1.33622e+08	8.69251e+07	2.18551	0.00122022	1.61467
Q15582	TGFBI	Transforming growth factor-beta-induced protein ig-h3 OS=Homo sapiens OX=9606 GN=TGFBI PE=1 SV=1	354	25	683	1.27324e+08	5.677e+07	6.19792e+08	3.31197e+08	2.48625e+08	1.5064e+08	2.09541e+08	3.88987e+08	192091898	1.85958e+08	708678659	819024742	503276483	1221998484	6.47459e+08	4.27442e+08	5.08419e+08	1121861132	1.56174e+08	2.76544e+08	1.43598	0.00648348	0.909709
P06753	TPM3	Tropomyosin alpha-3 chain OS=Homo sapiens OX=9606 GN=TPM3 PE=1 SV=2	354	6	285	6.15003e+07	5.4248e+07	8.33129e+07	5.64971e+07	6.41207e+07	5.54581e+07	6.25317e+07	5.63406e+07	5.49817e+07	4.46473e+07	6.92448e+07	9.36771e+07	1.18954e+08	8.88432e+07	1.30405e+08	146502773	132725075	105000844	109717337	6.3701e+07	0.897217	0.000730576	1.57679
Q7L7L0	H2AW	Histone H2A type 3 OS=Homo sapiens OX=9606 GN=HIST3H2A PE=1 SV=3	353	2	130	2400431204	1987093971	4241376129	1728065152	2215135683	3414264879	3028149980	2528075304	2183050456	1857161666	2880230552	5203342386	4463414876	4875634291	6900093441	4769904710	3771220471	3260814668	3168857208	3342277330	0.77112	0.00467358	0.932719
P35241	RDX	Radixin OS=Homo sapiens OX=9606 GN=RDX PE=1 SV=1	352	12	583	6.02528e+07	7.66297e+07	2.27155e+07	3.53864e+07	7.83731e+07	5.1558e+07	4.7299e+07	5.78053e+07	8.44113e+07	5.43737e+07	1.16254e+07	1.50021e+07	1.80569e+07	2.53098e+07	4.74309e+07	2.0227e+07	2.4993e+07	1.80196e+07	2.52264e+07	4.74797e+07	-1.31405	0.00101026	-1.20746
P50440	GATM	Glycine amidinotransferase, mitochondrial OS=Homo sapiens OX=9606 GN=GATM PE=1 SV=1	348	26	423	2424688462	2502050189	3.98606e+08	1470246797	8.44739e+08	2293124051	2845589226	7.05611e+08	1491874259	2165732310	1.10043e+07	4.72799e+07	3.80944e+06	4.83873e+07	0	7.58374e+06	1.00802e+08	5.10067e+07	3.5281e+08	1665670457	-4.63091	0.00085418	-1.79859
P62805	H4-16	Histone H4 OS=Homo sapiens OX=9606 GN=H4C1 PE=1 SV=2	345	13	103	2632992105	2105753832	2977554621	1951808051	1926970371	3084702893	2837615660	3364222124	2721933693	2128476497	3615142158	4591353366	4570457457	5409136892	4700766044	4359754420	5371532529	4026651408	2720013206	3444018670	0.765344	0.000226717	1.4049
Q08AH3	ACSM2A	Acyl-coenzyme A synthetase ACSM2A, mitochondrial OS=Homo sapiens OX=9606 GN=ACSM2A PE=1 SV=2	345	7	577	2.2121e+08	2.86995e+08	3.8116e+07	1.47836e+08	1.29495e+08	2.55034e+08	2.07571e+08	6.93086e+07	1.43013e+08	2.00722e+08	0	0	0	0	6.39673e+07	4.71282e+07	3.47934e+07	0	4.38057e+07	2.13293e+08	-3.01119	0.000787959	-1.4942
P13639	EEF2	Elongation factor 2 OS=Homo sapiens OX=9606 GN=EEF2 PE=1 SV=4	344	26	858	2.32247e+08	1.96816e+08	2.79796e+08	2.8332e+08	2.11804e+08	1.93871e+08	2.57768e+08	206250959	1.55867e+08	1.99871e+08	3.27753e+08	4.47443e+08	4.24272e+08	3.53638e+08	4.33563e+08	4.79176e+08	7.51917e+08	3.87799e+08	3.59091e+08	2.34202e+08	0.990192	0.000479931	1.38121
P16152	CBR1	Carbonyl reductase [NADPH] 1 OS=Homo sapiens OX=9606 GN=CBR1 PE=1 SV=3	342	18	277	8.25154e+08	8.32311e+08	5.15369e+08	5.48359e+08	4.75604e+08	8.53595e+08	8.70351e+08	7.7321e+08	6.40682e+08	7.06068e+08	2.8102e+08	3.34077e+08	308676287	2.58451e+08	2.4734e+08	160602502	1.64014e+08	2.25633e+08	5.26619e+08	8.7256e+08	-1.33808	3.78746e-05	-1.73144
P52272	HNRNPM	Heterogeneous nuclear ribonucleoprotein M OS=Homo sapiens OX=9606 GN=HNRNPM PE=1 SV=3	340	29	730	2.12112e+08	1.93329e+08	272228322	1.96566e+08	1.28202e+08	1.70589e+08	1.6589e+08	2.13962e+08	1.90533e+08	1.76228e+08	3.66374e+08	4.88188e+08	4.69357e+08	4.20095e+08	3.36158e+08	2.44852e+08	3.04886e+08	3.47886e+08	2.87773e+08	2.50397e+08	0.918503	0.000748703	1.50699
Q96KP4	CNDP2	Cytosolic non-specific dipeptidase OS=Homo sapiens OX=9606 GN=CNDP2 PE=1 SV=2	340	27	475	9.88981e+08	1095283238	4.18955e+08	9.42589e+08	720840666	948442232	8.82018e+08	7.47271e+08	6.04715e+08	9.17389e+08	1.57894e+08	2.13094e+08	2.34161e+08	1.2941e+08	2.06276e+08	1.77008e+08	1.82576e+08	1.88356e+08	9.04605e+08	672031603	-1.63622	0.000306222	-1.33414
P61978	HNRNPK	Heterogeneous nuclear ribonucleoprotein K OS=Homo sapiens OX=9606 GN=HNRNPK PE=1 SV=1	339	17	463	3.68572e+08	3.43627e+08	4.96952e+08	3.70102e+08	3.12056e+08	3.55017e+08	368893251	3.408e+08	3.28924e+08	3.00104e+08	478213936	5.6407e+08	7.03784e+08	5.99269e+08	6.05845e+08	3.93564e+08	5.37444e+08	4.52818e+08	4.39097e+08	386295512	0.565241	0.00208919	1.19191
P04075	ALDOA	Fructose-bisphosphate aldolase A OS=Homo sapiens OX=9606 GN=ALDOA PE=1 SV=2	338	24	364	4.39184e+08	4.36447e+08	5.44956e+08	537046696	7.00729e+08	3.87582e+08	4.25698e+08	5.2173e+08	4.00523e+08	455751317	608691621	643873435	9.76687e+08	5.40412e+08	722130456	9.00506e+08	1003033902	6.15341e+08	7.18485e+08	5.19039e+08	0.62455	0.00463128	1.05016
Q16555	DPYSL2	Dihydropyrimidinase-related protein 2 OS=Homo sapiens OX=9606 GN=DPYSL2 PE=1 SV=1	335	17	572	1.7176e+08	1.48139e+08	2.62832e+08	1.83378e+08	1.82771e+08	2.00421e+08	1.84257e+08	2.32147e+08	1.6849e+08	1.79073e+08	4.95711e+08	384252057	3.17003e+08	4.05715e+08	2.63362e+08	1.99902e+08	2.42228e+08	3.0608e+08	212457879	2.37814e+08	0.715088	0.0134805	0.987091
Q03252	LMNB2	Lamin-B2 OS=Homo sapiens OX=9606 GN=LMNB2 PE=1 SV=4	333	28	620	1.13063e+08	1.04378e+08	2.4322e+08	1.66658e+08	1.34581e+08	1.48812e+08	1.41574e+08	128951159	1.29439e+08	1.1009e+08	2.95897e+08	3.51197e+08	2.77908e+08	3.7247e+08	2.11769e+08	1.74788e+08	2.51933e+08	2.26428e+08	1.0629e+08	1.56909e+08	0.827187	0.0053931	0.937565
P08729	KRT7	Keratin, type II cytoskeletal 7 OS=Homo sapiens OX=9606 GN=KRT7 PE=1 SV=5	332	28	469	9.12416e+07	4.33209e+07	5.81588e+08	8.39596e+07	1.31204e+08	7.93524e+07	1.3202e+08	1.64763e+08	6.08604e+07	5.89243e+07	6.48914e+08	8.88134e+08	8.9085e+08	6.12284e+08	8.27122e+08	3.13042e+07	3.14571e+07	7.06207e+08	9.87142e+07	1.11885e+08	1.88214	0.0315084	0.770799
P30086	PEBP1	Phosphatidylethanolamine-binding protein 1 OS=Homo sapiens OX=9606 GN=PEBP1 PE=1 SV=3	332	17	187	1815974723	2581318535	8.66413e+08	1186390483	1586278355	1593084146	1650335440	1339142403	1272423505	1832139413	7.40544e+08	4.34315e+08	4.00489e+08	4.57395e+08	2.47334e+08	7.77788e+07	1.80493e+08	3.13315e+08	5.55389e+08	1483578530	-2.05432	3.26055e-05	-1.89386
P07195	LDHB	L-lactate dehydrogenase B chain OS=Homo sapiens OX=9606 GN=LDHB PE=1 SV=2	328	20	334	2117401927	2803753920	1034073493	1653055413	2069013621	2033990966	2089241420	1323038969	1473055243	1589342345	4.81736e+08	4.33136e+08	6.67612e+08	3.89403e+08	4.43652e+08	4.00553e+08	4.88191e+08	4.85145e+08	1432464688	1335977499	-1.64818	9.92725e-05	-1.56601
P40926	MDH2	Malate dehydrogenase, mitochondrial OS=Homo sapiens OX=9606 GN=MDH2 PE=1 SV=3	327	21	338	1304879513	1309364684	4.87914e+08	8.2184e+08	1024474880	1379492049	1071401611	1186768235	9.12999e+08	1063948272	3.28425e+08	3.01851e+08	416922307	1.81652e+08	2.52168e+08	2.37097e+08	2.76466e+08	2.45439e+08	6.2176e+08	1083268274	-1.73204	2.24717e-05	-1.95006
Q93088	BHMT	Betaine--homocysteine S-methyltransferase 1 OS=Homo sapiens OX=9606 GN=BHMT PE=1 SV=2	326	23	406	2368979902	3049692517	8.52758e+08	1149477137	8.64288e+08	2825956904	1669649383	1466148486	1438020621	2116097298	4.58629e+07	7.18051e+07	2.67446e+07	3.21092e+07	1.18159e+08	1.18785e+08	8.15995e+07	5.19356e+07	3.08499e+08	1051756595	-4.22705	0.000467297	-2.04806
Q08426	EHHADH	Peroxisomal bifunctional enzyme OS=Homo sapiens OX=9606 GN=EHHADH PE=1 SV=3	325	33	723	6.68157e+08	6.48101e+08	166679597	5.07974e+08	2.55555e+08	9.09092e+08	5.2096e+08	4.8036e+08	3.00098e+08	768323513	1.84877e+07	1.34722e+07	8.74576e+06	1.09491e+07	4.37473e+07	2.1424e+07	1.83667e+07	9.75047e+06	2.43197e+08	3.95401e+08	-3.59886	0.000478709	-1.62956
Q9GZM7	TINAGL1	Tubulointerstitial nephritis antigen-like OS=Homo sapiens OX=9606 GN=TINAGL1 PE=1 SV=1	322	16	467	4.89258e+08	2.30107e+08	7.11253e+08	3.32682e+08	3.36897e+08	3.62456e+08	3.81269e+08	6.53524e+08	4.42007e+08	3.64882e+08	4.9105e+08	6.64617e+08	705864475	5.1939e+08	9.60408e+07	1.89268e+07	0	5.17219e+08	5.30075e+08	5.10539e+08	-0.128741	0.775766	-0.0911087
P09651	HNRNPA1	Heterogeneous nuclear ribonucleoprotein A1 OS=Homo sapiens OX=9606 GN=HNRNPA1 PE=1 SV=5	318	15	372	2.27803e+08	2.25504e+08	3.98366e+08	2.49932e+08	2.03833e+08	1.74895e+08	1.82315e+08	2.15943e+08	1.70569e+08	1.8263e+08	4.1406e+08	3.88803e+08	6.63649e+08	4.3467e+08	461605934	3.02314e+08	4.34402e+08	3.83298e+08	3.31952e+08	248477593	0.925391	0.000551191	1.24772
P62937	PPIA	Peptidyl-prolyl cis-trans isomerase A OS=Homo sapiens OX=9606 GN=PPIA PE=1 SV=2	312	12	165	1237245498	1473551000	1135302973	9.50685e+08	7.75941e+08	1057808696	8.145e+08	1123697737	9.02405e+08	1098173443	9.42967e+08	1089746709	1439337766	8.93257e+08	7.38152e+08	7.00123e+08	8.19498e+08	1037794563	1037434235	1131637966	-0.129071	0.451708	-0.221427
P28331	NDUFS1	NADH-ubiquinone oxidoreductase 75 kDa subunit, mitochondrial OS=Homo sapiens OX=9606 GN=NDUFS1 PE=1 SV=3	306	27	727	2.75181e+08	285533388	1.57801e+08	2.20693e+08	3.00484e+08	3.09885e+08	277033517	3.26538e+08	2.97482e+08	2.94558e+08	5.39105e+07	7.70039e+07	9.96093e+07	5.70485e+07	3.80722e+07	4.51439e+07	5.06895e+07	2.91897e+07	1.12217e+08	3.03716e+08	-2.13399	8.82888e-07	-2.87997
P07237	P4HB	Protein disulfide-isomerase OS=Homo sapiens OX=9606 GN=P4HB PE=1 SV=3	305	29	508	2.16539e+08	225098051	1.59932e+08	2.40137e+08	1.79604e+08	1.30501e+08	2.19581e+08	1.93319e+08	1.52245e+08	1.54373e+08	3.0582e+08	3.84838e+08	5.0882e+08	2.32855e+08	3.80689e+08	740195649	987845681	2.88242e+08	3.89787e+08	2.28685e+08	1.32487	0.019646	1.05715
P02452	COL1A1	Collagen alpha-1(I) chain OS=Homo sapiens OX=9606 GN=COL1A1 PE=1 SV=5	305	21	1464	5.84402e+08	6.46275e+08	2953414594	1052057609	1168322395	2.87826e+08	8.05611e+08	1035598126	1004177397	1433858464	5238600864	1980121357	8.84544e+08	3555269622	1224536785	1077020549	1651251247	2151486875	5.92798e+08	1223618533	0.894459	0.141646	0.44987
Q02218	OGDH	2-oxoglutarate dehydrogenase, mitochondrial OS=Homo sapiens OX=9606 GN=OGDH PE=1 SV=3	305	24	1023	3.93225e+08	3.42642e+08	1.5864e+08	3.18605e+08	364064467	4.44805e+08	3.56111e+08	3.32243e+08	3.01351e+08	3.4684e+08	3.94417e+07	7.52721e+07	4.70095e+07	2.87902e+07	7.53148e+07	2.51341e+07	3.57873e+07	2.68446e+07	1.71283e+08	3.57586e+08	-2.52577	2.33206e-06	-2.43134
P07339	CTSD	Cathepsin D OS=Homo sapiens OX=9606 GN=CTSD PE=1 SV=1	304	20	412	5.28459e+08	3.10328e+08	2.34281e+08	4.56531e+08	2.38158e+08	2.12744e+08	3.17283e+08	2.54872e+08	1.41018e+08	1.80922e+08	2.25309e+08	2.39195e+08	5.84678e+08	1.25528e+08	5.54814e+08	7.20998e+08	1789087469	3.05038e+08	1522156075	3.19613e+08	1.22958	0.136583	0.573255
P21810	BGN	Biglycan OS=Homo sapiens OX=9606 GN=BGN PE=1 SV=2	302	14	368	2.33294e+08	2.00066e+08	462842281	3.60467e+08	409662471	1.62645e+08	5.0163e+08	6.06146e+08	3.16458e+08	3.12383e+08	1362987664	4.05108e+08	1.87114e+08	8.36177e+08	1094231664	3.42833e+08	5.14536e+08	1985153834	3.26808e+08	1.64508e+08	1.1365	0.108269	0.61347
P42765	ACAA2	3-ketoacyl-CoA thiolase, mitochondrial OS=Homo sapiens OX=9606 GN=ACAA2 PE=1 SV=2	300	23	397	1044070559	9.07229e+08	2.30445e+08	5.35086e+08	4.03806e+08	1319972446	6.11569e+08	7.86767e+08	599729039	7.04999e+08	4.1668e+07	5.4397e+07	5.0599e+07	22858317	8.37712e+07	3.92469e+07	4.61988e+07	5.34913e+07	4.28571e+08	7.27829e+08	-2.96956	0.000552508	-1.48022
P00738	HP	Haptoglobin OS=Homo sapiens OX=9606 GN=HP PE=1 SV=1	293	27	406	1.03624e+08	1.03e+08	1.59472e+08	1.73469e+07	3.66072e+07	3.24638e+08	3.08821e+08	2.34278e+08	1007106018	8.29796e+08	1391880272	6.53118e+08	5.47209e+08	8.93959e+08	8.28951e+08	1631678948	1342379119	1593682296	5.5135e+07	1.40138e+08	1.66824	0.00994673	0.825629
Q9BUF5	TUBB6	Tubulin beta-6 chain OS=Homo sapiens OX=9606 GN=TUBB6 PE=1 SV=1	293	6	446	4.61332e+06	1.68456e+06	2.97439e+07	2.14137e+07	2.62227e+07	2.52431e+07	8.16015e+06	5.53277e+06	4.46678e+06	1.02231e+07	2.80894e+07	2.0356e+07	2.06724e+07	1.96967e+07	5.04594e+07	1.81193e+07	4.32878e+07	1.04045e+07	1.81776e+07	9.71891e+06	0.891633	0.0793089	0.522861
P04040	CAT	Catalase OS=Homo sapiens OX=9606 GN=CAT PE=1 SV=3	292	22	527	451325585	5.80549e+08	2.46869e+08	3.2374e+08	2.43774e+08	6.19244e+08	3.51801e+08	3.13538e+08	2.70298e+08	3.55362e+08	1.44916e+08	127132681	1.93564e+08	1.39396e+08	2.15951e+08	4.93054e+08	2.40873e+08	1.03063e+08	1.97345e+08	2.6138e+08	-0.865739	0.0208584	-0.717125
P49419	ALDH7A1	Alpha-aminoadipic semialdehyde dehydrogenase OS=Homo sapiens OX=9606 GN=ALDH7A1 PE=1 SV=5	291	26	539	576291816	6.92583e+08	2.13229e+08	3.9847e+08	2.96293e+08	8.68327e+08	5.22049e+08	4.86513e+08	4.56037e+08	5.77465e+08	5.07751e+07	6.10142e+07	5.18251e+07	6.10323e+07	4.76266e+06	4.32866e+06	1.24324e+07	3.47098e+07	1.07495e+08	4.70803e+08	-3.55936	0.000191799	-2.21202
O95831	AIFM1	Apoptosis-inducing factor 1, mitochondrial OS=Homo sapiens OX=9606 GN=AIFM1 PE=1 SV=1	289	21	613	6.44876e+08	7.41174e+08	2.57072e+08	5.31738e+08	5.47049e+08	9.59984e+08	6.10831e+08	466805267	4.20462e+08	6.09169e+08	3.13491e+07	4.87732e+07	4.13714e+07	1.1912e+07	1.10504e+08	3.72317e+07	6.17552e+07	1.97358e+07	3.38177e+08	5.09304e+08	-2.89426	3.43164e-05	-1.81898
Q99715	COL12A1	Collagen alpha-1(XII) chain OS=Homo sapiens OX=9606 GN=COL12A1 PE=1 SV=2	288	55	3063	3.10099e+07	5.54626e+07	9.70423e+07	2.01266e+08	1.84072e+08	4.43203e+07	3.89399e+07	8.62371e+07	1.21129e+08	1.02682e+08	2.49552e+08	1.31751e+08	2.15042e+07	1.55393e+08	1.66443e+08	8.01845e+07	1474133160	2.58278e+08	8.44929e+07	7.55614e+07	1.59817	0.257796	0.406002
P09211	GSTP1	Glutathione S-transferase P OS=Homo sapiens OX=9606 GN=GSTP1 PE=1 SV=2	288	10	210	6.04449e+08	730660874	8.60458e+08	5.37719e+08	7.3605e+08	2.89105e+08	5.64827e+08	5.2081e+08	5.00316e+08	605968206	9.02069e+08	7.67724e+08	7.51195e+08	666050447	5.5981e+08	4.70194e+08	6.05824e+08	5.2057e+08	5.44472e+08	6.77881e+08	0.112068	0.567177	0.170968
P51884	LUM	Lumican OS=Homo sapiens OX=9606 GN=LUM PE=1 SV=2	285	18	338	2.31687e+08	223484267	7.00691e+08	2.4172e+08	2.56763e+08	1.41584e+08	2.6171e+08	3.60302e+08	2.87429e+08	3.22775e+08	1525026787	5.93837e+08	2.95187e+08	1196067529	7.8664e+08	7.49264e+08	9.95232e+08	1261343016	4.05541e+08	2.96902e+08	1.51855	0.00834206	1.06368
P42704	LRPPRC	Leucine-rich PPR motif-containing protein, mitochondrial OS=Homo sapiens OX=9606 GN=LRPPRC PE=1 SV=3	284	43	1394	2.74956e+08	2.28479e+08	6.77823e+07	248618200	2.04418e+08	2.59604e+08	2.31213e+08	2.12069e+08	2.01116e+08	2.42658e+08	1.7507e+07	3.11605e+07	4.04068e+07	1.93395e+07	40157569	2.53753e+07	2.33936e+07	1.76846e+07	1.42865e+08	220316296	-2.44871	1.73767e-05	-1.92669
P16403	H1-2	Histone H1.2 OS=Homo sapiens OX=9606 GN=H1-2 PE=1 SV=2	282	2	213	2.36478e+08	2.6541e+08	4.81411e+08	3.37112e+08	3.44163e+08	4.28594e+08	2.79706e+08	2.57273e+08	2.67495e+08	1.95269e+08	4.39235e+08	5.98519e+08	7.66722e+08	5.77089e+08	1207967131	5.11281e+08	9.74587e+08	4.47438e+08	311003285	3.31124e+08	1.06748	0.017324	0.955054
P49411	TUFM	Elongation factor Tu, mitochondrial OS=Homo sapiens OX=9606 GN=TUFM PE=1 SV=2	282	23	452	6.65338e+08	6.34534e+08	2.69213e+08	5.11126e+08	5.10711e+08	7.12268e+08	6.46628e+08	6.17737e+08	5.11105e+08	6.25433e+08	1.02132e+08	1.73269e+08	1.89473e+08	1.10731e+08	8.95285e+07	1.14686e+08	1.42819e+08	1.12306e+08	2.62638e+08	5.95957e+08	-1.98417	3.29281e-06	-2.46294
P38606	ATP6V1A	V-type proton ATPase catalytic subunit A OS=Homo sapiens OX=9606 GN=ATP6V1A PE=1 SV=2	281	23	617	4.55313e+08	5.12053e+08	1.64358e+08	2.78909e+08	2.19487e+08	440893809	3.37983e+08	2.17753e+08	2.35915e+08	3.50445e+08	9.39061e+07	8.38705e+07	1.05509e+08	1.02375e+08	9.33751e+07	2.18952e+08	155682175	6.53471e+07	287963268	3.24579e+08	-1.26056	0.00274582	-1.03262
P28838	LAP3	Cytosol aminopeptidase OS=Homo sapiens OX=9606 GN=LAP3 PE=1 SV=3	278	23	519	2.86641e+08	2.81529e+08	3.09205e+08	2.61303e+08	1.78807e+08	2.60044e+08	2.57932e+08	2.37081e+08	2.26644e+08	2.38604e+08	2.99118e+08	3.81865e+08	3.96939e+08	797594189	3.84717e+08	5.76333e+08	640951260	3.57581e+08	3.6043e+08	2.9021e+08	0.877283	0.012393	1.1089
P11310	ACADM	Medium-chain specific acyl-CoA dehydrogenase, mitochondrial OS=Homo sapiens OX=9606 GN=ACADM PE=1 SV=1	274	23	421	7.26526e+08	7.68093e+08	1.49379e+08	7.84434e+08	461046371	1084460576	6.36587e+08	5.94036e+08	5.12327e+08	5.50826e+08	1.05027e+07	4.79582e+07	2.17071e+07	7.83601e+06	4.68122e+07	4.05299e+07	2.17601e+07	2.45195e+07	1.88098e+08	6.68753e+08	-3.78321	0.00022196	-2.04257
Q9P2E9	RRBP1	Ribosome-binding protein 1 OS=Homo sapiens OX=9606 GN=RRBP1 PE=1 SV=5	273	37	1410	7.07273e+07	4.79618e+07	1.04599e+08	1.17754e+08	7.97333e+07	5.75686e+07	5.64268e+07	6.22963e+07	6.9377e+07	5.96246e+07	2.08078e+08	3.12654e+08	2.56018e+08	1.14851e+08	2.56363e+08	2.84313e+08	8.19259e+08	2.11521e+08	1.86205e+08	8.98232e+07	2.01942	0.00919238	1.03268
P13796	LCP1	Plastin-2 OS=Homo sapiens OX=9606 GN=LCP1 PE=1 SV=6	272	24	627	5.37121e+07	5.4008e+07	1.92478e+08	9.33434e+07	1.18822e+08	6.7836e+07	7.06941e+07	4.84059e+07	4.80026e+07	5.36288e+07	2.80825e+08	7.0663e+08	1501612841	7.54747e+08	1008887137	1174049580	1196950243	6.19789e+08	4.66774e+08	1.92403e+08	3.41903	0.00138747	1.88214
P49748	ACADVL	Very long-chain specific acyl-CoA dehydrogenase, mitochondrial OS=Homo sapiens OX=9606 GN=ACADVL PE=1 SV=1	272	27	655	3.30312e+08	2.47506e+08	1.15468e+08	2.94306e+08	2.23264e+08	4.30543e+08	275956176	2.9193e+08	2.4011e+08	2.06453e+08	7.41965e+07	9.84968e+07	9.77943e+07	4.51133e+07	1.72962e+08	6.73724e+07	7.93145e+07	5.4081e+07	2.4956e+08	2.18944e+08	-1.34814	0.00106618	-1.14517
P01008	SERPINC1	Antithrombin-III OS=Homo sapiens OX=9606 GN=SERPINC1 PE=1 SV=1	270	19	464	1.8279e+08	1.17352e+08	4.88375e+08	2.95921e+07	174577556	4.97611e+07	9.18443e+07	1.79727e+08	3.53181e+08	1.25952e+08	3.46829e+08	2.29155e+08	4.03325e+08	4.43708e+08	2.70744e+08	1.03206e+08	5.33865e+07	3.19945e+08	139030645	1.27487e+08	0.51698	0.313629	0.294643
P0DOY2	IGLC2	Immunoglobulin lambda constant 2 OS=Homo sapiens OX=9606 GN=IGLC2 PE=1 SV=1	269	3	106	132611672	8.46663e+07	1.41672e+08	5.49693e+07	1.64951e+08	4.22083e+07	235264788	1.78059e+08	391023915	1.4089e+08	493856627	7.01504e+08	1064692847	6.04404e+08	6.37749e+08	1552127893	2612067566	4.29385e+08	1066797428	1.3808e+08	2.70038	0.0142538	1.14686
P21980	TGM2	Protein-glutamine gamma-glutamyltransferase 2 OS=Homo sapiens OX=9606 GN=TGM2 PE=1 SV=2	268	22	687	2.16644e+07	2.0575e+07	1.53345e+08	2.29058e+08	1.93129e+08	3.52484e+07	4.90277e+07	7.18856e+07	5.64469e+07	1.15638e+08	7.63134e+08	5.19422e+08	5.10376e+08	1215868707	7.81094e+08	5.90384e+08	2.6465e+08	6.88484e+08	530573680	1.16819e+08	2.78394	0.000831165	1.74613
P54652	HSPA2	Heat shock-related 70 kDa protein 2 OS=Homo sapiens OX=9606 GN=HSPA2 PE=1 SV=1	267	9	639	1.61523e+07	1.37296e+07	3.25975e+07	2.79883e+07	5.7531e+07	9.33646e+06	1.86624e+07	4.92686e+07	3.03593e+07	1.56995e+07	8.77422e+07	2.13875e+07	4.28885e+06	2.64596e+07	1.11422e+07	1.21939e+07	8.05443e+06	3.25386e+07	8.14155e+06	1.84599e+07	-0.204302	0.76722	-0.0908061
P35908	KRT2	Keratin, type II cytoskeletal 2 epidermal OS=Homo sapiens OX=9606 GN=KRT2 PE=1 SV=2	266	20	639	3.78186e+07	7.33054e+07	4.78265e+07	2.38788e+07	3.96765e+07	2.68417e+07	3.66978e+07	1.23655e+08	1.19792e+08	5.36059e+07	1.88207e+08	4.17909e+07	5.11737e+07	4.38231e+07	6.44995e+07	2.54204e+08	5.15307e+07	1.22885e+08	1.62696e+08	2.42405e+07	0.902238	0.150234	0.472339
P05164	MPO	Myeloperoxidase OS=Homo sapiens OX=9606 GN=MPO PE=1 SV=1	263	33	745	8.78245e+06	2.46775e+06	9.97265e+07	2.82173e+07	7.3158e+07	3.74805e+07	1.42567e+07	4.33499e+06	1.21643e+07	1.70983e+07	1.16043e+08	1072975817	2536459694	1033237705	1557585503	12070231900	3611998849	3.22496e+08	4.33682e+08	1.50225e+07	6.40823	0.127889	0.700343
P10412	H1-4	Histone H1.4 OS=Homo sapiens OX=9606 GN=H1-4 PE=1 SV=2	262	4	219	8.8921e+08	9.0843e+08	1330485177	7.20832e+08	625287876	1016055636	1050467676	8.3644e+08	8.2126e+08	6.09437e+08	1522614327	2117424092	2043975863	1794763379	1935315465	7.89395e+08	1771899564	1490377033	8.92983e+08	1035160854	0.857062	0.00527527	1.09168
P11586	MTHFD1	C-1-tetrahydrofolate synthase, cytoplasmic OS=Homo sapiens OX=9606 GN=MTHFD1 PE=1 SV=3	262	28	935	2.04066e+08	1.92199e+08	1.2626e+08	1.41772e+08	1.76994e+08	2.92646e+08	1.53774e+08	156278577	1.70463e+08	1.92037e+08	3.78659e+07	5.42006e+07	7.2573e+07	2.90388e+07	1.55797e+07	1.03804e+08	6.0946e+07	3.52482e+07	120718598	1.85328e+08	-1.61719	8.23743e-05	-1.58303
P35527	KRT9	Keratin, type I cytoskeletal 9 OS=Homo sapiens OX=9606 GN=KRT9 PE=1 SV=3	261	20	623	7.16558e+07	1.87797e+08	1.75609e+08	82513434	1.90786e+08	4.22729e+08	1.13504e+08	129337953	5.83919e+07	105874673	4.97856e+08	5.09067e+07	1.86318e+08	1.55904e+08	1.04017e+08	6.10772e+08	1.51782e+08	1.57011e+08	2.42639e+08	3.91352e+07	0.639925	0.301544	0.309261
P55084	HADHB	Trifunctional enzyme subunit beta, mitochondrial OS=Homo sapiens OX=9606 GN=HADHB PE=1 SV=3	261	24	474	5.2337e+08	4.64652e+08	2.4567e+08	3.89175e+08	2.96804e+08	5.33648e+08	4.36824e+08	4.53874e+08	3.45711e+08	3.81662e+08	9.26814e+07	116153461	106712948	7.68038e+07	1.74641e+08	2.44555e+08	1.00077e+08	9.64481e+07	280401989	4.08174e+08	-1.50785	5.03979e-05	-1.6701
P39060	COL18A1	Collagen alpha-1(XVIII) chain OS=Homo sapiens OX=9606 GN=COL18A1 PE=1 SV=5	260	17	1754	5.11063e+08	3.34884e+08	6.69755e+08	3.42627e+08	3.4509e+08	4.83772e+08	611066810	6.6904e+08	5.6219e+08	3.43409e+08	3.32606e+08	6.96934e+08	4.98278e+08	4.61608e+08	2.61859e+08	4.82898e+07	4.75203e+07	4.52477e+08	3.65569e+08	4.99958e+08	-0.470507	0.166299	-0.410415
Q13228	SELENBP1	Methanethiol oxidase OS=Homo sapiens OX=9606 GN=SELENBP1 PE=1 SV=2	260	22	472	3.95779e+08	5.79636e+08	2.20861e+08	3.38143e+08	5.4374e+08	5.79425e+08	4.33629e+08	384272971	4.47236e+08	4.90992e+08	265670574	2.60102e+08	1.31488e+08	2.96492e+08	1.23444e+08	6.14723e+07	3.0793e+07	6.44061e+07	8.86645e+07	4.70402e+08	-1.58669	0.000152318	-1.45373
P62258	YWHAE	14-3-3 protein epsilon OS=Homo sapiens OX=9606 GN=YWHAE PE=1 SV=1	256	17	255	4.49959e+08	4.30524e+08	3.1882e+08	3.17654e+08	3.04051e+08	375991800	4.11789e+08	382304454	3.51119e+08	3.73506e+08	3.52001e+08	3.50723e+08	3.39517e+08	3.68184e+08	2.62564e+08	253007221	2.80022e+08	3.19631e+08	4.38316e+08	4.06412e+08	-0.174109	0.158385	-0.414153
P30038	ALDH4A1	Delta-1-pyrroline-5-carboxylate dehydrogenase, mitochondrial OS=Homo sapiens OX=9606 GN=ALDH4A1 PE=1 SV=3	256	22	563	1274474302	1390901812	3.24828e+08	9.97037e+08	7.17781e+08	1755210252	1247732313	4.98307e+08	5.73081e+08	1146793300	6.46978e+06	1.90578e+07	4.02633e+06	1.8732e+07	5.90926e+06	3.24434e+07	1.21645e+07	1.00767e+06	494030026	6.29865e+08	-3.91108	0.000461753	-1.59278
P02462	COL4A1	Collagen alpha-1(IV) chain OS=Homo sapiens OX=9606 GN=COL4A1 PE=1 SV=4	255	10	1669	1284455165	1015592058	1695789718	1166557827	1334534907	1111442596	1565317849	1770117950	1278770626	8.35874e+08	7.4834e+08	1259103758	7.85002e+08	7.33819e+08	6.4542e+08	1.23755e+08	8.27167e+07	1267968859	1155977018	1302535845	-0.788928	0.0125495	-0.789609
O75874	IDH1	Isocitrate dehydrogenase [NADP] cytoplasmic OS=Homo sapiens OX=9606 GN=IDH1 PE=1 SV=2	255	16	414	2.2209e+08	3.0156e+08	1.04709e+08	1.63024e+08	8.52056e+07	1.57792e+08	2.2908e+08	1.3576e+08	1.34063e+08	2.35913e+08	1.11803e+08	6.74154e+07	6.48983e+07	6.49152e+07	6.71718e+07	6.84098e+07	9.52741e+07	9.99088e+07	1.73047e+08	1.58673e+08	-0.970042	0.00921841	-0.882196
P13489	RNH1	Ribonuclease inhibitor OS=Homo sapiens OX=9606 GN=RNH1 PE=1 SV=2	252	18	461	1.23984e+08	1.5748e+08	1.57887e+08	1.54559e+08	1.51235e+08	1.41715e+08	1.26446e+08	1.36059e+08	1.09834e+08	1.13252e+08	1.62851e+08	1.23023e+08	226647834	1.29729e+08	2.45381e+08	342121843	350037136	1.61679e+08	1.63693e+08	1.46214e+08	0.625162	0.0594155	0.756514
P05165	PCCA	Propionyl-CoA carboxylase alpha chain, mitochondrial OS=Homo sapiens OX=9606 GN=PCCA PE=1 SV=4	251	32	728	3.73311e+08	3.43844e+08	1.22053e+08	2.56901e+08	2.93652e+08	4.49305e+08	3.16289e+08	2.87042e+08	2.83735e+08	3.22663e+08	1.01868e+07	1.73043e+07	3.00971e+07	5.09074e+06	2.65855e+07	3.98115e+07	4.53083e+06	4.27526e+06	9.89366e+07	3.54014e+08	-3.53438	3.05525e-06	-2.56964
P00338	LDHA	L-lactate dehydrogenase A chain OS=Homo sapiens OX=9606 GN=LDHA PE=1 SV=2	250	14	332	2.66875e+08	2.46556e+08	2.4613e+08	4.13428e+08	2.89087e+08	2.11803e+08	3.15315e+08	2.06362e+08	1.85259e+08	2.19876e+08	2.60809e+08	3.32532e+08	5.69491e+08	2.72196e+08	3.58458e+08	5.13815e+08	5.06269e+08	3.75411e+08	6.07082e+08	2.31928e+08	0.697612	0.0142556	0.871533
P31930	UQCRC1	Cytochrome b-c1 complex subunit 1, mitochondrial OS=Homo sapiens OX=9606 GN=UQCRC1 PE=1 SV=3	250	19	480	3.65613e+08	3.62847e+08	1.85231e+08	3.03948e+08	3.78342e+08	3.96307e+08	4.08747e+08	4.89762e+08	346319536	3.89317e+08	7.05055e+07	9.11089e+07	1.05852e+08	6.06665e+07	8.04419e+07	1.12857e+08	8.48883e+07	6.28828e+07	1.67336e+08	3.84244e+08	-1.96404	2.53645e-06	-2.54997
P09382	LGALS1	Galectin-1 OS=Homo sapiens OX=9606 GN=LGALS1 PE=1 SV=2	247	13	135	1.5783e+08	1.95916e+08	342017413	1.89078e+08	1.79017e+08	1.47535e+08	1.33544e+08	1.44181e+08	1.39249e+08	3.29541e+08	1005250603	544240727	5.24579e+08	6.78688e+08	9.64796e+08	1042618320	1294646084	5.5395e+08	3.54531e+08	2.06129e+08	1.98246	0.00180872	1.57229
O75891	ALDH1L1	Cytosolic 10-formyltetrahydrofolate dehydrogenase OS=Homo sapiens OX=9606 GN=ALDH1L1 PE=1 SV=2	247	27	902	3.74901e+08	5.20452e+08	7.01621e+07	2.22972e+08	2.08879e+08	4.81905e+08	2.46927e+08	3.25166e+08	2.78467e+08	3.37173e+08	5.79117e+06	5.73819e+06	9.33353e+06	0	0	2.51282e+07	1.10708e+07	3.0545e+06	1.27918e+08	2.17562e+08	-3.87576	0.000363224	-1.73539
P18669	PGAM1	Phosphoglycerate mutase 1 OS=Homo sapiens OX=9606 GN=PGAM1 PE=1 SV=2	246	15	254	2.33448e+08	3.34122e+08	1.88819e+08	2.23952e+08	2.77275e+08	1.79307e+08	2.27083e+08	2.04209e+08	2.26286e+08	261678402	2.90804e+08	2.46899e+08	2.47275e+08	2.37816e+08	1.16063e+08	2.43104e+08	2.9467e+08	187886497	240779928	2.65634e+08	-0.0104215	0.951838	-0.017976
Q96I99	SUCLG2	Succinate--CoA ligase [GDP-forming] subunit beta, mitochondrial OS=Homo sapiens OX=9606 GN=SUCLG2 PE=1 SV=2	246	22	432	5.21161e+08	6.57999e+08	1.434e+08	4.04604e+08	3.57476e+08	5.94964e+08	5.03645e+08	4.01739e+08	3.79322e+08	5.37997e+08	4.5877e+07	4.71427e+07	1.86984e+07	1.00686e+07	2.3478e+07	1.46583e+07	2.52413e+07	2.29056e+07	216232212	5.03999e+08	-3.2555	4.74627e-05	-2.02043
P01861	IGHG4	Immunoglobulin heavy constant gamma 4 OS=Homo sapiens OX=9606 GN=IGHG4 PE=1 SV=1	243	6	327	1.55578e+07	0	7.14923e+07	4.95236e+06	2.98109e+07	8.58796e+06	2.74187e+07	3.09733e+07	5.13708e+08	2.77209e+08	3.28132e+07	1.9812e+07	1.12766e+07	3.47541e+08	5.14758e+07	1061128796	2.41566e+08	3.53835e+07	3.73453e+08	7.95932e+06	1.30223	0.322818	0.299523
P30041	PRDX6	Peroxiredoxin-6 OS=Homo sapiens OX=9606 GN=PRDX6 PE=1 SV=3	242	16	224	4.32381e+08	5.29214e+08	3.06824e+08	2.84186e+08	3.31887e+08	4.81258e+08	3.75194e+08	3.46645e+08	3.17638e+08	3.82315e+08	2.5661e+08	2.35387e+08	3.04558e+08	2.09247e+08	2.34225e+08	2.21883e+08	163992117	2.12316e+08	2.76394e+08	3.49644e+08	-0.688866	0.000786953	-1.25934
Q96CM8	ACSF2	Medium-chain acyl-CoA ligase ACSF2, mitochondrial OS=Homo sapiens OX=9606 GN=ACSF2 PE=1 SV=2	240	19	615	3.89123e+08	411312436	7.53118e+07	277854813	1.89732e+08	4.5056e+08	4.7818e+08	1.95695e+08	2.45082e+08	4.61254e+08	0	2.08289e+07	4.4055e+06	2.92375e+06	2.31149e+07	0	3.55237e+06	7.02089e+06	1.04605e+08	2.85735e+08	-4.10117	0.000409388	-1.82624
Q3LXA3	TKFC	Triokinase/FMN cyclase OS=Homo sapiens OX=9606 GN=TKFC PE=1 SV=2	240	20	575	5.65902e+08	5.91057e+08	1.50326e+08	1.86159e+08	3.64473e+08	7.14032e+08	4.22483e+08	3.80975e+08	3.91481e+08	4.88976e+08	1.87246e+07	2.02788e+07	2.88073e+07	9.88542e+06	7.25832e+06	8.22165e+06	1.2852e+07	7.11735e+06	5.81149e+07	3.65181e+08	-4.48319	0.000308278	-2.24558
P00966	ASS1	Argininosuccinate synthase OS=Homo sapiens OX=9606 GN=ASS1 PE=1 SV=2	238	24	412	1228722820	1834019890	2.86236e+08	7.58077e+08	3.50371e+08	1118824605	1368925621	4.33956e+08	5.20443e+08	1080632323	1.24994e+07	3.26484e+07	1.86744e+07	1.66028e+07	1.24476e+08	2.58296e+07	4.32148e+07	1.32987e+07	3.26812e+08	5.67031e+08	-3.7183	0.00208609	-1.42821
P34896	SHMT1	Serine hydroxymethyltransferase, cytosolic OS=Homo sapiens OX=9606 GN=SHMT1 PE=1 SV=1	238	20	483	5.44665e+08	6.78282e+08	1.73141e+08	4.65857e+08	4.24374e+08	5.85922e+08	5.63405e+08	4.58623e+08	520132715	5.45557e+08	2.51489e+07	3.2082e+07	2.08901e+07	1.48975e+07	6.34072e+06	4.12579e+06	2.06345e+07	1.47071e+07	1.88895e+08	4.54563e+08	-3.76778	2.74215e-06	-2.52265
P07737	PFN1	Profilin-1 OS=Homo sapiens OX=9606 GN=PFN1 PE=1 SV=2	237	12	140	4.09458e+08	4.22298e+08	5.37227e+08	4.09954e+08	4.02765e+08	3.53058e+08	4.00005e+08	3.54838e+08	3.01355e+08	4.01311e+08	6.35111e+08	9.12161e+08	1771084521	8.66719e+08	1064513606	1736628994	1381415872	8.33293e+08	7.91157e+08	4.98608e+08	1.47558	0.00313947	1.56839
Q00839	HNRNPU	Heterogeneous nuclear ribonucleoprotein U OS=Homo sapiens OX=9606 GN=HNRNPU PE=1 SV=6	233	21	825	1.70057e+08	1.44908e+08	2.9719e+08	1.44769e+08	1.34902e+08	1.37346e+08	1.69965e+08	1.3952e+08	1.43554e+08	1.306e+08	2.616e+08	2.90021e+08	3.32634e+08	301719549	3.12167e+08	167385506	2.37237e+08	2.55976e+08	1.87032e+08	1.80749e+08	0.69249	0.0027068	0.995006
P10909	CLU	Clusterin OS=Homo sapiens OX=9606 GN=CLU PE=1 SV=1	233	14	449	2.69873e+08	1.96531e+08	1.54875e+08	1.44543e+08	1.8686e+08	2.13936e+08	2.87077e+08	4.46656e+08	2.98688e+08	1.70659e+08	356622374	3.0916e+08	3.8774e+08	4.69748e+08	2.98134e+08	6.17783e+08	1.58946e+08	472137382	3.1555e+08	2.23452e+08	0.666805	0.031522	0.65992
P38117	ETFB	Electron transfer flavoprotein subunit beta OS=Homo sapiens OX=9606 GN=ETFB PE=1 SV=3	232	16	255	3.92946e+08	4.20313e+08	1.13487e+08	309989339	2.81946e+08	5.25825e+08	3.22522e+08	3.36122e+08	256675257	3.34112e+08	1.78544e+07	4.99185e+07	4.25839e+07	2.43479e+07	3.39374e+07	4.15289e+07	6.4071e+07	2.78495e+07	1.40279e+08	2.87059e+08	-2.74448	2.46187e-05	-2.03744
P16402	H1-3	Histone H1.3 OS=Homo sapiens OX=9606 GN=H1-3 PE=1 SV=2	231	2	221	4.88924e+06	3.09227e+06	3.66378e+07	1.0334e+07	1.49752e+07	5.68979e+06	4.32946e+06	9.13144e+06	4.27998e+06	6.10665e+06	6.18391e+07	8.15434e+07	2.03546e+08	87075050	2.08429e+08	1.18177e+08	8.61056e+07	6.76679e+07	2.17373e+07	2.09585e+07	3.38642	0.00598394	1.36038
O75309	CDH16	Cadherin-16 OS=Homo sapiens OX=9606 GN=CDH16 PE=2 SV=1	231	19	829	3.17353e+08	2.32704e+08	1.50159e+08	2.9747e+08	479362078	2.68436e+08	3.04113e+08	5.40217e+08	3.8483e+08	3.0116e+08	3.53081e+07	5.01655e+06	0	0	0	0	10521787	0	2.75991e+07	3.45406e+08	-5.23201	9.84314e-05	-2.6296
P00325	ADH1B	All-trans-retinol dehydrogenase [NAD(+)] ADH1B OS=Homo sapiens OX=9606 GN=ADH1B PE=1 SV=2	229	16	375	130006423	8.94397e+07	2.20622e+08	2.70189e+08	176634252	1.27296e+08	4.13542e+08	5.04118e+08	2.73295e+08	1.69577e+08	5.1106e+08	6.56961e+08	2.66275e+08	472083741	1.12678e+08	9.62399e+06	0	2.00419e+08	1.03412e+08	2.11265e+08	0.126131	0.839657	0.0622578
P02790	HPX	Hemopexin OS=Homo sapiens OX=9606 GN=HPX PE=1 SV=2	228	14	462	5.37374e+08	271410630	3.2171e+08	4.32237e+07	485403136	3.21561e+08	5.28098e+08	3.69151e+08	1553467307	4.61051e+08	8.15699e+08	4.75879e+08	2.62596e+08	9.45007e+08	9.75994e+08	7.54917e+08	5.82897e+08	8.41585e+08	2.89103e+07	3.1791e+08	0.368222	0.487309	0.207329
Q99623	PHB2	Prohibitin-2 OS=Homo sapiens OX=9606 GN=PHB2 PE=1 SV=2	228	14	299	2.35899e+08	1.83005e+08	1.38081e+08	1.99347e+08	2.26249e+08	2.93228e+08	216113472	2.22955e+08	2.00691e+08	2.08536e+08	8.36303e+07	1.18681e+08	1.32535e+08	9.71576e+07	1.33292e+08	1.55571e+08	1.34721e+08	9.99955e+07	1.30276e+08	2.28473e+08	-0.816017	0.000122968	-1.55325
P22695	UQCRC2	Cytochrome b-c1 complex subunit 2, mitochondrial OS=Homo sapiens OX=9606 GN=UQCRC2 PE=1 SV=3	228	15	453	3.04503e+08	3.06457e+08	1.2168e+08	2.24899e+08	2.33047e+08	3.20033e+08	2.78777e+08	3.66276e+08	3.12023e+08	3.30916e+08	6.76573e+07	6.85221e+07	4.83952e+07	3.60045e+07	1.27823e+07	3.73391e+07	3.43666e+07	4.02062e+07	1.30582e+08	3.3658e+08	-2.40411	5.09838e-06	-2.30594
P30084	ECHS1	Enoyl-CoA hydratase, mitochondrial OS=Homo sapiens OX=9606 GN=ECHS1 PE=1 SV=4	228	21	290	1031649610	1069862046	1.58859e+08	530149684	5.31262e+08	1405581457	688568697	7.26378e+08	5.9603e+08	9.3701e+08	5.263e+07	4.64044e+07	3.06374e+07	3.26445e+07	5.12997e+07	1.31096e+07	2.98469e+07	3.53016e+07	304346989	8.16926e+08	-3.53431	0.000607317	-1.67294
P27797	CALR	Calreticulin OS=Homo sapiens OX=9606 GN=CALR PE=1 SV=1	227	15	417	1.54141e+08	2.19732e+08	1.3423e+08	1.69613e+08	1.34736e+08	4.13192e+07	1.69379e+08	1.25218e+08	9.81254e+07	9.35934e+07	3.05023e+08	2.85822e+08	4.84331e+08	1.41441e+08	1.50644e+08	1.8915e+08	6.19552e+08	1.83005e+08	3.24933e+08	1.54478e+08	1.15401	0.0337476	0.822529
P02649	APOE	Apolipoprotein E OS=Homo sapiens OX=9606 GN=APOE PE=1 SV=1	226	18	317	1.66411e+08	1.77891e+08	9.23818e+07	1.05528e+08	1.24853e+08	9.14012e+07	1.20954e+08	2.63378e+08	8.81743e+07	5.46026e+07	9.90664e+07	6.54554e+07	1.34772e+08	1.37021e+08	3.68409e+08	5.45411e+08	7.42816e+08	201113804	2.59034e+08	1.00706e+08	1.14184	0.126824	0.568631
P09525	ANXA4	Annexin A4 OS=Homo sapiens OX=9606 GN=ANXA4 PE=1 SV=4	226	16	319	373781267	4.30562e+08	4.06787e+08	3.7923e+08	3.58461e+08	3.49004e+08	3.28257e+08	2.51932e+08	2.74859e+08	337440320	484265193	517212940	6.26147e+08	4.75572e+08	4.13939e+08	714668209	482810669	4.06929e+08	7.53024e+08	4.21783e+08	0.633921	0.00481949	1.12443
P31040	SDHA	Succinate dehydrogenase [ubiquinone] flavoprotein subunit, mitochondrial OS=Homo sapiens OX=9606 GN=SDHA PE=1 SV=2	225	20	664	3.07137e+08	2.45491e+08	8.70309e+07	2.27437e+08	2.61446e+08	3.74916e+08	349431579	2.53758e+08	2.2287e+08	2.89835e+08	3.64316e+07	4.55326e+07	5.83276e+07	3.25267e+07	4.1017e+07	7.06542e+07	5.78924e+07	2.61365e+07	1.36302e+08	2.65629e+08	-2.22336	2.9339e-05	-1.92828
P04083	ANXA1	Annexin A1 OS=Homo sapiens OX=9606 GN=ANXA1 PE=1 SV=2	224	22	346	5.65948e+07	2.90097e+07	181316185	6.82122e+07	7.84415e+07	3.98418e+07	5.70984e+07	6.4894e+07	4.71171e+07	9.2746e+07	3.67267e+08	4.51916e+08	5.82079e+08	4.67954e+08	4.84218e+08	9.52138e+08	6.63805e+08	3.24303e+08	245933581	1.09158e+08	2.81801	0.00106717	1.81115
Q13423	NNT	NAD(P) transhydrogenase, mitochondrial OS=Homo sapiens OX=9606 GN=NNT PE=1 SV=3	224	28	1086	2.62158e+08	2.26328e+08	1.79817e+08	2.41375e+08	266402376	2.29361e+08	2.88278e+08	3.41843e+08	2.4053e+08	2.42263e+08	1.52339e+08	1.00514e+08	4.73925e+07	1.5904e+08	1.48749e+08	1.49143e+08	1.35137e+08	1.62225e+08	1.09259e+08	268973761	-0.961638	6.3193e-05	-1.61498
P02766	TTR	Transthyretin OS=Homo sapiens OX=9606 GN=TTR PE=1 SV=1	223	8	147	5.0005e+08	8.7098e+08	359856970	1.54197e+07	1.79694e+08	3.15295e+08	2.83101e+08	3.13589e+08	5.51392e+08	5.405e+08	4.43019e+08	2.83504e+08	4.66527e+08	5.19355e+08	5.72904e+08	3.81043e+08	1.40667e+08	2.25309e+08	9.89597e+07	3.05241e+08	-0.175726	0.697216	-0.117679
P09467	FBP1	Fructose-1,6-bisphosphatase 1 OS=Homo sapiens OX=9606 GN=FBP1 PE=1 SV=5	223	18	338	1124389105	1732312266	9.98941e+08	7.48477e+08	6.5867e+08	1078468217	6.99224e+08	8.52998e+08	7.63242e+08	1216277038	2012679541	4.66525e+08	2.09987e+08	8.5133e+08	8.16021e+08	1083424924	4.58792e+08	1158890297	4.87914e+08	7.83685e+08	-0.235857	0.546944	-0.181912
Q16698	DECR1	2,4-dienoyl-CoA reductase, mitochondrial OS=Homo sapiens OX=9606 GN=DECR1 PE=1 SV=1	222	15	335	3.31434e+08	3.26729e+08	1.4318e+08	2.94689e+08	3.49305e+08	3.6978e+08	3.32008e+08	3.40057e+08	2.74347e+08	3.48543e+08	4.24777e+07	4.92515e+07	3.67161e+07	3.26657e+07	4.40158e+07	2.77409e+07	4.56061e+07	4.94672e+07	1.27853e+08	3.10738e+08	-2.61849	9.417e-07	-2.89744
P37802	TAGLN2	Transgelin-2 OS=Homo sapiens OX=9606 GN=TAGLN2 PE=1 SV=3	221	13	199	318970086	2.37093e+08	3.88945e+08	3.11813e+08	2.64212e+08	2.19701e+08	2.23693e+08	3.01507e+08	2.84972e+08	3.15551e+08	5.60428e+08	8.81984e+08	6.25272e+08	655023470	5.58162e+08	5.58418e+08	8.09029e+08	6.1436e+08	4.43065e+08	3.64676e+08	1.14515	2.08257e-05	1.96084
P19338	NCL	Nucleolin OS=Homo sapiens OX=9606 GN=NCL PE=1 SV=3	220	16	710	9.99084e+07	8.8262e+07	2.59625e+08	1.40606e+08	1.05186e+08	1.09797e+08	8.36521e+07	1.05727e+08	1.27983e+08	8.81983e+07	3.27688e+08	3.09609e+08	317104536	4.7532e+08	1.96837e+08	2.03544e+08	3.59189e+08	2.78483e+08	1.33718e+08	1.29789e+08	1.25759	0.00111488	1.16045
P00491	PNP	Purine nucleoside phosphorylase OS=Homo sapiens OX=9606 GN=PNP PE=1 SV=2	220	15	289	2.31378e+08	3.28471e+08	8.60705e+07	1.83899e+08	182763823	2.40466e+08	1.72642e+08	2.01495e+08	2.10691e+08	2.41492e+08	27717136	6.02361e+07	9.82735e+07	4.35383e+07	2.12758e+07	9.40098e+07	4.2028e+07	4.63469e+07	9.11545e+07	2.0913e+08	-1.83491	6.51469e-05	-1.73
O94760	DDAH1	N(G),N(G)-dimethylarginine dimethylaminohydrolase 1 OS=Homo sapiens OX=9606 GN=DDAH1 PE=1 SV=3	220	15	285	3.87779e+08	5.39833e+08	2.92391e+08	2.65604e+08	3.13529e+08	4.93957e+08	3.38508e+08	2.37147e+08	2.93388e+08	3.19416e+08	7.52672e+07	8.06587e+07	4.87643e+07	5.25079e+07	8.3528e+07	0	0	2.7589e+07	1.32518e+08	269906858	-2.64533	1.01951e-05	-2.18778
P21281	ATP6V1B2	V-type proton ATPase subunit B, brain isoform OS=Homo sapiens OX=9606 GN=ATP6V1B2 PE=1 SV=3	219	13	511	3.18772e+08	3.89416e+08	1.42711e+08	225699820	1.90151e+08	3.69782e+08	2.69175e+08	1.45497e+08	1.75496e+08	2.53609e+08	4.22378e+07	5.86983e+07	9.09343e+07	4.70464e+07	6.9489e+07	2.83482e+08	1.83324e+08	5.1434e+07	1.97094e+08	2.18954e+08	-1.12467	0.0102674	-0.81082
P05141	SLC25A5	ADP/ATP translocase 2 OS=Homo sapiens OX=9606 GN=SLC25A5 PE=1 SV=7	219	7	298	6.87893e+08	6.58372e+08	2.4845e+08	5.14355e+08	5.96312e+08	4.697e+08	7.52848e+08	6.24188e+08	4.67503e+08	5.42336e+08	1.23077e+08	1.59586e+08	1.50902e+08	1.98173e+08	2.1345e+08	2.09723e+08	2.29205e+08	1.35152e+08	3.03411e+08	5.26166e+08	-1.53894	3.14874e-05	-1.93062
O75083	WDR1	WD repeat-containing protein 1 OS=Homo sapiens OX=9606 GN=WDR1 PE=1 SV=4	218	19	606	1.14198e+08	9.00854e+07	1.20535e+08	1.24544e+08	7.60003e+07	6.40113e+07	1.16503e+08	1.21818e+08	9.02266e+07	1.37411e+08	2.56077e+08	2.18502e+08	2.44637e+08	1.79568e+08	1.52789e+08	2.51492e+08	1.95062e+08	2.33454e+08	1.8471e+08	1.39487e+08	1.01262	1.81507e-05	1.8821
Q16891	IMMT	MICOS complex subunit MIC60 OS=Homo sapiens OX=9606 GN=IMMT PE=1 SV=1	218	29	758	1.97884e+08	1.81378e+08	8.23772e+07	1.68059e+08	2.058e+08	2.15014e+08	1.86355e+08	1.87508e+08	1.77294e+08	177509528	4.29679e+07	6.53127e+07	5.84654e+07	4.68852e+07	4.12198e+07	3.51254e+07	4.7398e+07	5.20865e+07	1.1515e+08	1.95024e+08	-1.66596	7.49025e-06	-2.13206
P01871	IGHM	Immunoglobulin heavy constant mu OS=Homo sapiens OX=9606 GN=IGHM PE=1 SV=4	217	7	453	3.09396e+06	8.87267e+06	1.36464e+08	7.39392e+06	8.00139e+07	2.03293e+06	1.23971e+08	1.12569e+08	2.54998e+08	1.20814e+07	1.00904e+08	2183530248	6.74049e+08	2.82209e+08	9.82182e+08	7.13491e+08	1234805945	8.08321e+07	1.69391e+08	3.79913e+07	3.26639	0.0454178	0.880227
P63104	YWHAZ	14-3-3 protein zeta/delta OS=Homo sapiens OX=9606 GN=YWHAZ PE=1 SV=1	216	13	245	2.60989e+08	3.12311e+08	3.3619e+08	2.90656e+08	3.42375e+08	2.40631e+08	2.55095e+08	2.34732e+08	220268303	2.52342e+08	5.20825e+08	5.69652e+08	9.04872e+08	4.53409e+08	4.62432e+08	3.76102e+08	6.09949e+08	4.90931e+08	4.28462e+08	2.75677e+08	0.962912	0.0005478	1.38671
O14950	MYL12B	Myosin regulatory light chain 12B OS=Homo sapiens OX=9606 GN=MYL12B PE=1 SV=2	216	4	172	183751167	2.09349e+08	2.80002e+08	2.21783e+08	214955890	1.73207e+08	205838339	2.41101e+08	2.17421e+08	2.73135e+08	4.61798e+08	4.93599e+08	4.58645e+08	4.00006e+08	4.01953e+08	282830933	4.43206e+08	5.01737e+08	2.5369e+08	2.48913e+08	0.887627	0.000672794	1.62888
Q15365	PCBP1	Poly(rC)-binding protein 1 OS=Homo sapiens OX=9606 GN=PCBP1 PE=1 SV=2	215	9	356	1.87122e+08	1.95786e+08	1.90765e+08	1.92255e+08	196365622	2.00872e+08	1.6426e+08	1.62541e+08	1.58768e+08	1.52215e+08	1.99544e+08	2.44702e+08	3.61302e+08	2.10599e+08	3.34815e+08	358693964	3.65432e+08	2.03257e+08	2.17352e+08	2.00188e+08	0.622688	0.0116909	1.09878
P49189	ALDH9A1	4-trimethylaminobutyraldehyde dehydrogenase OS=Homo sapiens OX=9606 GN=ALDH9A1 PE=1 SV=3	215	19	494	3.51767e+08	3.28984e+08	1.42173e+08	2.2594e+08	3.03613e+08	4.83661e+08	2.84721e+08	2.84234e+08	2.47478e+08	1.98906e+08	119097395	8.76224e+07	1.11844e+08	1.11291e+08	8.7573e+07	1.14446e+08	1.01766e+08	7.19412e+07	1.75929e+08	2.81032e+08	-1.38663	0.000359212	-1.50951
P16444	DPEP1	Dipeptidase 1 OS=Homo sapiens OX=9606 GN=DPEP1 PE=1 SV=3	215	16	411	635691630	7.17315e+08	1.16964e+08	1.34306e+08	2.31047e+08	7.03248e+08	3.20934e+08	2.61036e+08	4.00092e+08	3.2918e+08	0	2.30313e+08	4.5476e+07	1.61666e+06	1.35606e+07	2.76689e+07	5.19033e+06	2.46341e+07	2.50128e+07	4.40655e+08	-3.21371	0.00286144	-1.21951
P0DP25	CALM3	Calmodulin-3 OS=Homo sapiens OX=9606 GN=CALM3 PE=1 SV=1	214	10	149	5.21126e+08	7.57693e+08	408857629	4.39448e+08	6.48444e+08	5.92983e+08	3.3149e+08	3.78837e+08	3.46165e+08	4.29804e+08	492174513	5.32816e+08	8.45386e+08	4.32839e+08	7.37857e+08	3.45914e+08	5.26293e+08	4.00039e+08	3.48225e+08	3.99653e+08	0.0933853	0.710695	0.109761
P07911	UMOD	Uromodulin OS=Homo sapiens OX=9606 GN=UMOD PE=1 SV=1	213	17	640	7.9456e+08	2.63294e+08	1202099512	1.9768e+08	2.66131e+08	1.49802e+08	3.77801e+08	4.61106e+08	195731787	1.81478e+08	5.4524e+07	1.5758e+08	1.25325e+08	4.99887e+07	1.06481e+08	9.18158e+07	7.02831e+07	470913959	2.72402e+08	3.00574e+08	-1.39527	0.0872971	-0.563335
Q99497	PARK7	Protein/nucleic acid deglycase DJ-1 OS=Homo sapiens OX=9606 GN=PARK7 PE=1 SV=2	212	10	189	2.86177e+08	3.74919e+08	229973735	174951610	2.02724e+08	1.97756e+08	2.24118e+08	1.89087e+08	1.98691e+08	2.50346e+08	233512199	2.41093e+08	2.67088e+08	2.11239e+08	1.13195e+08	1.16171e+08	187302571	1.82809e+08	1.78738e+08	2.5498e+08	-0.27582	0.196274	-0.380759
P14550	AKR1A1	Aldo-keto reductase family 1 member A1 OS=Homo sapiens OX=9606 GN=AKR1A1 PE=1 SV=3	212	17	325	8.76808e+08	9.97873e+08	3.71757e+08	6.66797e+08	5.72916e+08	9.54494e+08	9.49627e+08	5.27532e+08	6.44041e+08	9.11011e+08	1.6624e+08	1.53687e+08	1.39139e+08	1.21046e+08	2.1e+08	1.82082e+08	2.56118e+08	1.04499e+08	3.42989e+08	7.43717e+08	-2.00481	9.57375e-05	-2.02487
P06744	GPI	Glucose-6-phosphate isomerase OS=Homo sapiens OX=9606 GN=GPI PE=1 SV=4	211	18	558	2.98325e+08	2.69468e+08	199301398	2.36341e+08	2.89946e+08	2.30131e+08	2.98321e+08	2.45884e+08	2.07433e+08	2.34239e+08	1.4541e+08	1.48884e+08	1.70414e+08	123304316	124672687	2.43804e+08	2.32938e+08	1.8448e+08	2.90204e+08	2.7252e+08	-0.440582	0.0188123	-0.737225
P30837	ALDH1B1	Aldehyde dehydrogenase X, mitochondrial OS=Homo sapiens OX=9606 GN=ALDH1B1 PE=1 SV=3	211	19	517	3.04626e+08	1.94671e+08	6.73962e+07	1.32587e+08	2.77374e+08	5.09946e+08	2.36444e+08	190205509	1.65791e+08	1.66395e+08	8.74154e+06	8.59379e+06	0	2.73128e+06	0	3.59261e+06	2.08879e+07	2.40514e+07	2.64295e+08	158470898	-2.60186	0.00423476	-0.956719
Q15063	POSTN	Periostin OS=Homo sapiens OX=9606 GN=POSTN PE=1 SV=2	209	27	836	1.52159e+07	2.97897e+06	717585690	1.91666e+07	5.51567e+06	1.97589e+06	1.00502e+07	1.48578e+07	8.05584e+06	2.97853e+07	4.97167e+08	2.83381e+08	3.29836e+08	5.66852e+08	1089875869	1185403516	1101961161	1108193068	4.38687e+07	2.28262e+08	3.063	0.00793472	0.975888
P08758	ANXA5	Annexin A5 OS=Homo sapiens OX=9606 GN=ANXA5 PE=1 SV=2	208	18	320	3.4942e+08	3.77641e+08	6.60917e+08	3.76985e+08	4.02546e+08	343806419	4.02681e+08	3.95638e+08	3.2468e+08	310855289	6.97183e+08	7.0985e+08	7.27733e+08	6.91309e+08	8.57554e+08	8.7031e+08	6.62066e+08	6.27876e+08	6.04958e+08	4.33429e+08	0.860955	2.65697e-05	1.7809
P0DOX8		Immunoglobulin lambda-1 light chain OS=Homo sapiens OX=9606 PE=1 SV=1	207	5	216	1.70398e+08	8.47528e+07	2.76593e+08	9.3402e+07	2.90679e+08	1.08276e+08	3.6609e+08	2.49182e+08	8.11973e+08	3.03964e+08	7.03037e+08	1291443222	1354135522	9.83442e+08	8.31098e+08	1706474100	4237533919	6.16455e+08	1765057153	2.61688e+08	2.44347	0.0232804	0.98237
P02511	CRYAB	Alpha-crystallin B chain OS=Homo sapiens OX=9606 GN=CRYAB PE=1 SV=2	207	11	175	1819258779	8.39531e+08	5.72295e+08	8.07538e+08	1184327005	1463706624	6.8049e+08	783261625	5.60535e+08	9.88475e+08	2.94305e+08	1.56492e+08	1.69135e+08	3.16443e+08	3580220689	3.80444e+08	6.69841e+08	2.01286e+08	3750123020	8.66411e+08	0.124807	0.891755	0.0489881
P69891	HBG1	Hemoglobin subunit gamma-1 OS=Homo sapiens OX=9606 GN=HBG1 PE=1 SV=2	207	3	147	4.44776e+06	2.43958e+07	1.94288e+07	0	9.66557e+06	1.07124e+07	3.84396e+06	1.85101e+07	7.22006e+07	0	7.54419e+06	2.75278e+06	1.90649e+07	0	4.29956e+06	3.08466e+07	0	0	4.01285e+06	7.07251e+06	-1.10007	0.35771	-0.288083
P09327	VIL1	Villin-1 OS=Homo sapiens OX=9606 GN=VIL1 PE=1 SV=4	207	24	827	1.84357e+08	2.19522e+08	3.58811e+07	1.49788e+08	2.98611e+08	3.11376e+08	2.30512e+08	1.47902e+08	2.71891e+08	1.71834e+08	1.53674e+07	9.16542e+06	1.44589e+07	4.86616e+06	6.32676e+07	3.71918e+07	2.77006e+07	7.61549e+06	6.76525e+07	2.29531e+08	-2.8793	0.000418345	-1.72841
P04004	VTN	Vitronectin OS=Homo sapiens OX=9606 GN=VTN PE=1 SV=1	205	10	478	5.242e+08	2.63564e+08	2.94744e+08	1.82953e+08	3.20731e+08	2.57992e+08	3.70526e+08	5.01615e+08	3.81823e+08	2.01598e+08	4.17395e+08	4.44036e+08	2.37701e+08	511434680	4.43026e+08	1719187757	2.5174e+08	728652564	3.70279e+08	2.61919e+08	0.786765	0.181892	0.44417
P31946	YWHAB	14-3-3 protein beta/alpha OS=Homo sapiens OX=9606 GN=YWHAB PE=1 SV=3	205	6	246	1.30548e+08	1.59771e+08	2.10522e+08	1.97274e+08	2.06272e+08	1.46647e+08	1.44601e+08	1.30597e+08	1.14066e+08	1.07832e+08	2.67543e+08	2.38341e+08	3.96695e+08	2.38612e+08	2.50802e+08	2.23871e+08	3.19001e+08	2.25878e+08	2.02886e+08	1.29931e+08	0.762478	0.000928636	1.16632
Q9HBL0	TNS1	Tensin-1 OS=Homo sapiens OX=9606 GN=TNS1 PE=1 SV=2	204	27	1735	5.12311e+07	6.18685e+07	9.07638e+07	7.73436e+07	5.88881e+07	9.02727e+07	8.89587e+07	9.21098e+07	1.11484e+08	1.12603e+08	2.46181e+08	1.60141e+08	4.44127e+07	135920670	8.92643e+07	2.18137e+07	1.80123e+07	1.33293e+08	3.20349e+07	7.2604e+07	0.228585	0.666517	0.15425
P06727	APOA4	Apolipoprotein A-IV OS=Homo sapiens OX=9606 GN=APOA4 PE=1 SV=3	204	25	396	1.40803e+08	4.46074e+08	1.4797e+08	1.09115e+07	1.24433e+08	7.76419e+07	2.64209e+08	2.23626e+08	4.95331e+07	1.14819e+08	3.26005e+08	3.64332e+07	3.18607e+08	1.51494e+08	1.5932e+08	169403222	1.74316e+08	1.52844e+08	1.43068e+08	7.79917e+07	0.180104	0.73278	0.10439
Q08257	CRYZ	Quinone oxidoreductase OS=Homo sapiens OX=9606 GN=CRYZ PE=1 SV=1	204	18	329	5.316e+08	6.28955e+08	4.07187e+08	4.22733e+08	3.88825e+08	5.43936e+08	5.63087e+08	4.53146e+08	2.87252e+08	4.30113e+08	2.75014e+08	5.48564e+07	3.90728e+07	6.85708e+07	1.83353e+08	7.94782e+07	1.75092e+07	3.39445e+08	1.83532e+08	3.73059e+08	-1.75604	5.74884e-05	-1.61988
P00505	GOT2	Aspartate aminotransferase, mitochondrial OS=Homo sapiens OX=9606 GN=GOT2 PE=1 SV=3	203	19	430	4.93034e+08	3.58733e+08	153551045	2.372e+08	3.91444e+08	4.34075e+08	3.82246e+08	4.84355e+08	3.97891e+08	3.9272e+08	1.12902e+08	1.27917e+08	9.97425e+07	1.00727e+08	6.40415e+07	7.85917e+07	7.21165e+07	1.03738e+08	2.08218e+08	4.50492e+08	-1.79227	3.43848e-05	-1.89561
P50395	GDI2	Rab GDP dissociation inhibitor beta OS=Homo sapiens OX=9606 GN=GDI2 PE=1 SV=2	202	14	445	1.39424e+08	1.56135e+08	1.1181e+08	1.22158e+08	1.05282e+08	1.02902e+08	1.34847e+08	1.30717e+08	1.22552e+08	1.43898e+08	1.51501e+08	1.92727e+08	216459121	1.61998e+08	2.10192e+08	1.62676e+08	210965231	1.61829e+08	1.39375e+08	1.50849e+08	0.492505	0.00190329	1.17918
P02792	FTL	Ferritin light chain OS=Homo sapiens OX=9606 GN=FTL PE=1 SV=2	201	9	175	313611173	9.28267e+08	2.00443e+08	350907276	4.98607e+08	1213806688	5.45969e+08	2.50384e+08	1.40546e+08	4.29627e+08	2.23321e+08	1.59864e+08	3.02085e+08	8.75539e+07	1123578576	1969390726	8843533303	7.03487e+08	1076389621	4.01398e+08	1.72435	0.335024	0.381419
P26641	EEF1G	Elongation factor 1-gamma OS=Homo sapiens OX=9606 GN=EEF1G PE=1 SV=3	201	20	437	1.08925e+08	9.86133e+07	1.25971e+08	9.49335e+07	9.26279e+07	9.11042e+07	1.15874e+08	8.04965e+07	7.92917e+07	8.21831e+07	1.70533e+08	1.96955e+08	141621629	1.01427e+08	2.65236e+08	2.55915e+08	3.11226e+08	1.56641e+08	1.69482e+08	9.94687e+07	1.01888	0.00605371	1.26834
P35221	CTNNA1	Catenin alpha-1 OS=Homo sapiens OX=9606 GN=CTNNA1 PE=1 SV=1	201	23	906	1.0926e+08	1.13031e+08	1.02194e+08	1.39281e+08	1.15808e+08	122074607	1.32679e+08	1.55324e+08	1.23197e+08	1.03344e+08	8.68325e+07	6.99765e+07	4.70846e+07	3.71419e+07	2.07568e+07	5.68526e+06	1.42927e+07	5.55459e+07	1.15297e+08	1.13807e+08	-1.27402	0.000951202	-1.43203
P51991	HNRNPA3	Heterogeneous nuclear ribonucleoprotein A3 OS=Homo sapiens OX=9606 GN=HNRNPA3 PE=1 SV=2	200	15	378	1.00062e+08	83456750	2.26177e+08	1.33697e+08	1.53868e+08	1.05688e+08	1.11597e+08	1.22089e+08	1.05781e+08	9.70414e+07	3.09144e+08	2.55363e+08	3.086e+08	3.01841e+08	2.41542e+08	1.39185e+08	2.39886e+08	2.69169e+08	1.3816e+08	1.32144e+08	0.981693	0.000787959	1.19504
P80404	ABAT	4-aminobutyrate aminotransferase, mitochondrial OS=Homo sapiens OX=9606 GN=ABAT PE=1 SV=3	200	25	500	573701243	7.44265e+08	1.21044e+08	3.57036e+08	245679394	6.36823e+08	404103180	3.65002e+08	3.95316e+08	4.60764e+08	2.30763e+07	1.15058e+07	1.00072e+07	1.37876e+07	9.05172e+06	7.73185e+06	1.08362e+07	1.81352e+07	4.54967e+07	4.34663e+08	-4.69413	0.000387986	-2.23004
P21399	ACO1	Cytoplasmic aconitate hydratase OS=Homo sapiens OX=9606 GN=ACO1 PE=1 SV=3	199	29	889	3.97987e+08	4.70546e+08	1.9343e+08	270133431	2.59694e+08	5.19705e+08	3.52826e+08	1.92866e+08	1.90352e+08	3.60297e+08	5.99962e+07	8.04617e+07	5.1635e+07	5.15031e+07	9.05075e+07	1.0545e+08	8.12736e+07	5.94209e+07	200168839	2.92347e+08	-1.88728	0.000546668	-1.49848
P04843	RPN1	Dolichyl-diphosphooligosaccharide--protein glycosyltransferase subunit 1 OS=Homo sapiens OX=9606 GN=RPN1 PE=1 SV=1	198	21	607	8.30478e+07	8.95274e+07	102410116	1.07961e+08	1.04746e+08	1.13943e+08	8.60543e+07	1.05105e+08	7.42602e+07	7.93222e+07	1.67749e+08	2.42623e+08	1.90687e+08	1.06274e+08	1.45161e+08	2.53611e+08	4.49304e+08	1.43418e+08	1.24409e+08	1.04461e+08	1.09802	0.031522	0.961282
P24844	MYL9	Myosin regulatory light polypeptide 9 OS=Homo sapiens OX=9606 GN=MYL9 PE=1 SV=4	197	4	172	4.371e+07	5.14674e+07	8.41833e+07	6.07681e+07	4.80045e+07	2.47058e+07	4.76157e+07	5.97773e+07	7.70955e+07	2.05167e+08	5.85015e+08	2.68142e+08	5.84919e+07	2.00486e+08	7.60967e+07	7.31669e+07	9.15336e+07	3.06183e+08	4.28566e+07	6.71125e+07	1.42865	0.130796	0.553518
P23526	AHCY	Adenosylhomocysteinase OS=Homo sapiens OX=9606 GN=AHCY PE=1 SV=4	197	17	432	3.81513e+08	4.20972e+08	1.52902e+08	2.30024e+08	1.52424e+08	4.03263e+08	2.34081e+08	2.96517e+08	2.81986e+08	321990375	5.96612e+07	1.15452e+08	70490465	8.25066e+07	6.75735e+07	7.86815e+07	7.34845e+07	6.46984e+07	1.47485e+08	2.78629e+08	-1.76776	0.000418345	-1.71243
Q92841	DDX17	Probable ATP-dependent RNA helicase DDX17 OS=Homo sapiens OX=9606 GN=DDX17 PE=1 SV=2	196	15	729	9.6839e+07	6.0309e+07	1.81854e+08	8.37836e+07	9.50496e+07	1.0831e+08	8.19022e+07	9.19227e+07	8.0185e+07	6.85713e+07	1.69214e+08	1.91422e+08	1.82026e+08	1.81392e+08	2.00892e+08	1.67643e+08	161627326	1.73111e+08	1.20929e+08	9.24994e+07	0.858584	0.000195344	1.44698
P07942	LAMB1	Laminin subunit beta-1 OS=Homo sapiens OX=9606 GN=LAMB1 PE=1 SV=2	196	32	1786	5.81941e+07	3.82509e+07	2.162e+08	7.82035e+07	2.09481e+07	5.91094e+07	9.28276e+07	9.56102e+07	7.77382e+07	3.49188e+07	7.54398e+07	1.51387e+08	1.33201e+08	1.15909e+08	1.22143e+08	6.94905e+07	2.23219e+07	2.17385e+08	9.41527e+07	1.03216e+08	0.52739	0.264508	0.326229
P33121	ACSL1	Long-chain-fatty-acid--CoA ligase 1 OS=Homo sapiens OX=9606 GN=ACSL1 PE=1 SV=1	196	25	698	2.07583e+08	1.71961e+08	1.01974e+08	2.82652e+08	1.91399e+08	2.66126e+08	2.05799e+08	2.4523e+08	1.39196e+08	1.73046e+08	3.86072e+07	1.55417e+07	3.01676e+07	1.49605e+07	3.261e+07	2.35602e+08	4.76589e+07	2.38973e+07	2.8565e+08	1.63827e+08	-1.30167	0.0145783	-0.783394
P12955	PEPD	Xaa-Pro dipeptidase OS=Homo sapiens OX=9606 GN=PEPD PE=1 SV=3	196	17	493	2.85941e+08	2.99061e+08	1.26306e+08	2.00169e+08	1.28754e+08	2.50168e+08	1.86188e+08	1.12905e+08	126018738	1.87465e+08	1.7549e+07	3.14791e+07	2.57247e+07	2.43868e+07	5.14126e+07	2.07772e+07	4.09069e+07	2.99125e+07	2.16814e+08	1.30025e+08	-1.8998	0.00118153	-1.11638
O00299	CLIC1	Chloride intracellular channel protein 1 OS=Homo sapiens OX=9606 GN=CLIC1 PE=1 SV=4	195	14	241	1.8651e+08	1.94455e+08	2.01852e+08	2.23643e+08	2.61973e+08	1.67811e+08	2.03075e+08	1.35905e+08	1.69718e+08	1.61825e+08	1.52174e+08	2.2611e+08	3.40175e+08	1.6739e+08	2.60278e+08	4.37897e+08	3.13478e+08	2.01234e+08	349459488	1.98718e+08	0.512593	0.0651979	0.659758
Q15019	SEPTIN2	Septin-2 OS=Homo sapiens OX=9606 GN=SEPTIN2 PE=1 SV=1	194	13	361	53691367	3.54088e+07	1.56198e+08	6.87267e+07	8.87381e+07	3.51703e+07	6.01942e+07	8.84915e+07	5.65214e+07	1.26062e+08	2.1622e+08	1.94034e+08	1.18867e+08	200269032	1.79366e+08	7.82441e+07	1.20685e+08	1.51538e+08	7.95775e+07	8.20367e+07	0.95151	0.00881568	0.834284
P32119	PRDX2	Peroxiredoxin-2 OS=Homo sapiens OX=9606 GN=PRDX2 PE=1 SV=5	194	14	198	2.46945e+08	3.63933e+08	3.08143e+08	1.81021e+08	2.41868e+08	2.78456e+08	203616597	2.37866e+08	2.41841e+08	2.1699e+08	2.02616e+08	1.43134e+08	1.41196e+08	1.53081e+08	1.25928e+08	4.03286e+08	8.07041e+07	9.3276e+07	1.57417e+08	1.93372e+08	-0.596233	0.0498133	-0.60693
P20700	LMNB1	Lamin-B1 OS=Homo sapiens OX=9606 GN=LMNB1 PE=1 SV=2	193	20	586	1.89155e+07	1.41641e+07	1.54091e+08	3.17173e+07	3.5079e+07	1.45284e+07	2.17081e+07	3.65406e+07	2.97532e+07	2.65417e+07	2.23509e+08	2.20333e+08	3.9531e+08	336749023	3.60126e+08	2.38804e+08	2.57934e+08	2.65174e+08	6.82599e+07	8.45588e+07	2.77901	5.37683e-05	1.72514
P02760	AMBP	Protein AMBP OS=Homo sapiens OX=9606 GN=AMBP PE=1 SV=1	193	11	352	2.22766e+08	3.81512e+08	1.10565e+08	8.75697e+07	1.44784e+08	9.86364e+07	2.45257e+08	1.6377e+08	1.68386e+08	1.38292e+08	2.88878e+08	1.88873e+08	4.55896e+08	3.91518e+08	2.11937e+08	1.24963e+08	5.49682e+07	3.63624e+08	1.02756e+08	1.21088e+08	0.461754	0.298587	0.308139
P06702	S100A9	Protein S100-A9 OS=Homo sapiens OX=9606 GN=S100A9 PE=1 SV=1	192	9	114	3.94486e+07	24914533	8.1586e+07	3.48077e+07	1.1642e+08	5.59704e+07	4.98416e+07	2.51534e+07	3.7423e+07	3.86595e+07	2.44985e+08	1793658958	4199925930	1012191130	2153419829	4422111616	4784437404	6.13865e+08	1438209922	5.11068e+07	5.50883	0.0118829	1.3518
P78371	CCT2	T-complex protein 1 subunit beta OS=Homo sapiens OX=9606 GN=CCT2 PE=1 SV=4	191	20	535	9.64833e+07	9.32197e+07	8.56231e+07	9.00406e+07	6.28933e+07	7.88476e+07	8.23038e+07	8.07929e+07	7.39496e+07	8.65433e+07	7.33821e+07	8.83815e+07	110487650	8.56056e+07	6.03937e+07	9.24065e+07	9.21386e+07	9.18564e+07	1.19088e+08	8.07323e+07	0.122249	0.340059	0.284685
P05166	PCCB	Propionyl-CoA carboxylase beta chain, mitochondrial OS=Homo sapiens OX=9606 GN=PCCB PE=1 SV=3	191	20	539	2.52043e+08	2.30431e+08	8.83596e+07	1.85655e+08	2.56556e+08	3.49118e+08	207525776	2.0089e+08	2.04642e+08	228113530	1.08372e+07	1.13826e+07	1.18483e+07	2.2074e+06	8.77168e+07	0	3.86971e+06	6.57062e+06	7.40627e+07	2.39332e+08	-3.2496	1.10568e-05	-2.11334
P27824	CANX	Calnexin OS=Homo sapiens OX=9606 GN=CANX PE=1 SV=2	190	16	592	1.25801e+08	1.27492e+08	1.74831e+08	1.80234e+08	1.43094e+08	1.33889e+08	1.30349e+08	1.28306e+08	101107066	1.11899e+08	1.6685e+08	2.16981e+08	2.12289e+08	1.73098e+08	294360719	2.61909e+08	3.86449e+08	1.92218e+08	1.42307e+08	1.22084e+08	0.74471	0.0159569	0.960703
Q9ULD0	OGDHL	2-oxoglutarate dehydrogenase-like, mitochondrial OS=Homo sapiens OX=9606 GN=OGDHL PE=1 SV=3	190	14	1010	9.28613e+07	9.0737e+07	1.68714e+07	5.51996e+07	6.22553e+07	1.24496e+08	5.8335e+07	7.79721e+07	6.78575e+07	9.73102e+07	0	1.44947e+06	0	0	0	0	2.62121e+06	0	1.257e+07	9.73546e+07	-5.33031	0.00020568	-2.28218
Q08211	DHX9	ATP-dependent RNA helicase A OS=Homo sapiens OX=9606 GN=DHX9 PE=1 SV=4	189	21	1270	8.08177e+07	6.13888e+07	1.3193e+08	1.01708e+08	7.26809e+07	7.77345e+07	7.56918e+07	8.20613e+07	8.50721e+07	6.29988e+07	1.0828e+08	1.5472e+08	1.38183e+08	143859965	1.29492e+08	1.06021e+08	9.1542e+07	1.2384e+08	7.67477e+07	8.59068e+07	0.518431	0.00926203	0.82534
P61158	ACTR3	Actin-related protein 3 OS=Homo sapiens OX=9606 GN=ACTR3 PE=1 SV=3	187	12	418	7.32292e+07	7.11454e+07	1.03592e+08	9.72217e+07	7.65466e+07	5.58948e+07	8.25814e+07	8.47587e+07	6.98334e+07	7.55982e+07	1.70126e+08	2.30378e+08	3.13811e+08	2.08688e+08	2.66522e+08	5.20124e+08	3.59523e+08	2.19206e+08	1.60317e+08	1.09765e+08	1.78336	0.00308105	1.61204
P39687	ANP32A	Acidic leucine-rich nuclear phosphoprotein 32 family member A OS=Homo sapiens OX=9606 GN=ANP32A PE=1 SV=1	186	6	249	4.056e+07	4.72266e+07	7.13696e+07	4.76984e+07	7.51266e+07	3.83278e+07	4.11836e+07	3.0053e+07	3.53515e+07	2.59287e+07	6.35323e+07	6.40395e+07	1.12771e+08	6.14916e+07	7.56611e+07	4.44127e+07	8.79705e+07	7.00249e+07	4.83293e+07	3.34739e+07	0.624348	0.022982	0.700448
Q99714	HSD17B10	3-hydroxyacyl-CoA dehydrogenase type-2 OS=Homo sapiens OX=9606 GN=HSD17B10 PE=1 SV=3	186	11	261	1.93368e+08	2.17953e+08	1.06479e+08	1.89151e+08	1.97775e+08	2.993e+08	2.20948e+08	2.38819e+08	1.76753e+08	2.19712e+08	9.33997e+07	1.0518e+08	1.28008e+08	6.71369e+07	4.36719e+07	7.31611e+07	2.7833e+08	7.66892e+07	1.00497e+08	2.05571e+08	-0.940616	0.00603466	-0.887487
P12236	SLC25A6	ADP/ATP translocase 3 OS=Homo sapiens OX=9606 GN=SLC25A6 PE=1 SV=4	186	2	298	4.36969e+07	3.45027e+07	2.27155e+07	4.34271e+07	5.96981e+07	2.21154e+07	6.09938e+07	5.43657e+07	4.30164e+07	4.26271e+07	17771140	1.92221e+07	2.12189e+07	1.43293e+07	2.52924e+07	1.65607e+07	1.85572e+07	1.30275e+07	3.94615e+07	3.97657e+07	-1.05181	0.0020007	-1.08688
P40925	MDH1	Malate dehydrogenase, cytoplasmic OS=Homo sapiens OX=9606 GN=MDH1 PE=1 SV=4	186	14	334	3.33932e+08	4.55379e+08	1.94171e+08	3.19049e+08	3.52439e+08	3.44793e+08	321799399	2.16378e+08	262582556	2.37915e+08	1.62779e+08	1.24368e+08	2.1442e+08	1.15375e+08	7.04046e+07	9.63692e+07	158574693	1.05051e+08	2.42217e+08	2.42618e+08	-1.08445	0.000543248	-1.26507
O14745	SLC9A3R1	Na(+)/H(+) exchange regulatory cofactor NHE-RF1 OS=Homo sapiens OX=9606 GN=SLC9A3R1 PE=1 SV=4	186	16	358	7.21095e+08	1200950263	232537816	5.94785e+08	9.08847e+08	1182416130	7.28705e+08	3.76202e+08	7.96056e+08	6.47022e+08	8.49166e+06	4.26392e+07	5.08675e+07	2.07066e+07	1.26259e+08	3.17466e+07	8.62158e+07	2.10233e+07	3.58215e+08	5.75171e+08	-3.15574	0.000364756	-1.65384
O95954	FTCD	Formimidoyltransferase-cyclodeaminase OS=Homo sapiens OX=9606 GN=FTCD PE=1 SV=2	186	22	541	3.50224e+08	7.11565e+08	5.76818e+07	1.28888e+08	2.33118e+08	633070425	2.11087e+08	1.39559e+08	2.61103e+08	4.43711e+08	1.31876e+07	1.51502e+07	2.38121e+07	1.24809e+07	0	1.59155e+07	2.47633e+07	1.59051e+07	1.39724e+08	229465659	-3.4507	0.00664682	-1.16761
P60842	EIF4A1	Eukaryotic initiation factor 4A-I OS=Homo sapiens OX=9606 GN=EIF4A1 PE=1 SV=1	185	9	406	1.00417e+08	6.99082e+07	1.09785e+08	1.16581e+08	6.28104e+07	8.53253e+07	8.15739e+07	1.08787e+08	8.88765e+07	8.83043e+07	1.25884e+08	2.04479e+08	1.93511e+08	1.82656e+08	1.97243e+08	2.75514e+08	2.85513e+08	1.87002e+08	1.97758e+08	1.20078e+08	1.1715	3.7938e-05	1.83227
Q14315	FLNC	Filamin-C OS=Homo sapiens OX=9606 GN=FLNC PE=1 SV=3	184	20	2725	2.889e+07	2.22764e+07	6.65251e+07	3.75226e+07	31886948	2.25152e+07	2.37396e+07	4.51689e+07	6.29337e+07	9.25335e+07	3.17662e+08	1.16513e+08	4.21531e+07	1.47739e+08	1.17098e+08	8.66134e+07	5.73293e+07	1.89159e+08	2.16645e+07	3.43108e+07	1.48842	0.0594883	0.728676
P12956	XRCC6	X-ray repair cross-complementing protein 6 OS=Homo sapiens OX=9606 GN=XRCC6 PE=1 SV=2	184	18	609	7.69034e+07	5.56854e+07	1.32864e+08	7.15842e+07	6.74229e+07	6.79632e+07	6.7378e+07	6.79275e+07	7.87692e+07	6.85608e+07	1.75677e+08	2.05301e+08	2.02212e+08	1.98916e+08	1.73746e+08	8.55674e+07	107149839	1.85595e+08	1.0576e+08	9.5953e+07	1.08334	0.0017967	1.31238
P11177	PDHB	Pyruvate dehydrogenase E1 component subunit beta, mitochondrial OS=Homo sapiens OX=9606 GN=PDHB PE=1 SV=3	184	12	359	1.97242e+08	161612145	1.079e+08	1.50258e+08	1.78395e+08	1.60954e+08	164701825	2.45868e+08	2.06146e+08	1.8646e+08	9.10155e+07	7.80655e+07	7.19194e+07	5.51907e+07	3.25839e+07	2.16241e+07	2.89286e+07	7.10038e+07	9.98124e+07	2.27747e+08	-1.52531	2.02796e-05	-1.86736
P84243	H3-3A	Histone H3.3 OS=Homo sapiens OX=9606 GN=H3-3A PE=1 SV=2	183	8	136	1178514220	1244113956	2168592756	1190535698	1269963285	1377791748	1404658184	1406569174	1189651878	6.89343e+08	1854524291	2861214051	2821444580	3385806127	2909590609	2143054119	3192415310	2024765274	1158943748	1376569832	0.920653	0.00347145	1.13556
P51888	PRELP	Prolargin OS=Homo sapiens OX=9606 GN=PRELP PE=1 SV=1	182	12	382	6.22582e+07	3.4997e+07	2.55048e+08	9.91655e+07	131518875	1.87601e+07	8.35299e+07	1.70846e+08	1.12223e+08	1.84184e+08	9.94229e+08	3.54561e+08	8.50704e+07	5.87621e+08	3.78041e+08	1.95388e+08	4.85513e+08	8.0455e+08	6.56611e+07	1.07727e+08	1.92928	0.0319073	0.881464
P49368	CCT3	T-complex protein 1 subunit gamma OS=Homo sapiens OX=9606 GN=CCT3 PE=1 SV=4	182	19	545	1.41872e+08	1.45644e+08	129977753	1.40467e+08	8.81133e+07	1.39051e+08	1.23194e+08	1.27996e+08	1.12284e+08	1.10619e+08	7.79279e+07	1.1586e+08	1.25458e+08	1.15501e+08	1.45036e+08	1.89847e+08	1.27252e+08	1.14145e+08	1.84325e+08	1.19255e+08	0.0769103	0.659833	0.136467
P35232	PHB	Prohibitin OS=Homo sapiens OX=9606 GN=PHB PE=1 SV=1	182	12	272	2.5566e+08	2.1274e+08	1.5516e+08	2.15576e+08	2.52123e+08	3.6687e+08	2.44704e+08	235736889	2.11206e+08	225137043	7.57459e+07	1.24197e+08	1.44615e+08	1.08806e+08	1.80068e+08	1.74177e+08	1.23585e+08	9.75283e+07	1.54217e+08	249755240	-0.853496	0.00059671	-1.2629
Q8NE62	CHDH	Choline dehydrogenase, mitochondrial OS=Homo sapiens OX=9606 GN=CHDH PE=1 SV=2	182	24	594	2.5437e+08	3.48884e+08	7.28097e+07	1.53428e+08	1.26688e+08	3.3639e+08	2.74716e+08	1.37785e+08	2.30587e+08	3.44579e+08	1.02151e+08	8.03538e+06	1.34785e+07	9.58074e+07	1.66189e+07	6.96772e+07	6.77647e+06	9.20928e+07	1.0353e+08	2.3135e+08	-2.0138	0.00135485	-1.25326
P07858	CTSB	Cathepsin B OS=Homo sapiens OX=9606 GN=CTSB PE=1 SV=3	181	10	339	378886899	258900471	1.46543e+08	2.27333e+08	1.40169e+08	3.06458e+08	2.41845e+08	2.15058e+08	1.41429e+08	2.39558e+08	7.32486e+07	1.17211e+08	2.13553e+08	8.36743e+07	2.25418e+08	7.08586e+08	8.07452e+08	1.76892e+08	8.52306e+08	304278699	0.656904	0.338663	0.348104
P02533	KRT14	Keratin, type I cytoskeletal 14 OS=Homo sapiens OX=9606 GN=KRT14 PE=1 SV=4	181	6	472	3.81348e+07	7.05738e+07	2.39135e+07	4.96378e+07	5.72713e+07	1.76165e+08	2.862e+07	3.20559e+07	2.65778e+07	3.08623e+07	5.36214e+07	6.92823e+06	3.1405e+07	1.84603e+07	5.89445e+07	6.80878e+07	4.27621e+07	2.30974e+07	4.10393e+07	1.68119e+07	-0.480472	0.451008	-0.242693
P13667	PDIA4	Protein disulfide-isomerase A4 OS=Homo sapiens OX=9606 GN=PDIA4 PE=1 SV=2	179	24	645	5.4727e+07	4.33044e+07	7.41952e+07	6.54563e+07	3.87115e+07	3.13713e+07	6.18059e+07	4.43134e+07	3.00361e+07	3.59409e+07	1.30564e+08	2.13985e+08	190830231	1.14116e+08	170802912	1.84605e+08	5.05334e+08	1.5772e+08	1.2956e+08	5.36131e+07	2.05732	0.00319847	1.19677
P09960	LTA4H	Leukotriene A-4 hydrolase OS=Homo sapiens OX=9606 GN=LTA4H PE=1 SV=2	179	20	611	1.36975e+08	1.51141e+08	1.48469e+08	1.37884e+08	1.27001e+08	1.14324e+08	1.25956e+08	1.3389e+08	1.1997e+08	1.43762e+08	2.27859e+08	1.85707e+08	2.5859e+08	1.84222e+08	1.7753e+08	3.6374e+08	3.23769e+08	1.67552e+08	1.71327e+08	1.66093e+08	0.773299	0.010721	1.1946
P17174	GOT1	Aspartate aminotransferase, cytoplasmic OS=Homo sapiens OX=9606 GN=GOT1 PE=1 SV=3	179	15	413	2.55163e+08	2.91803e+08	1.34359e+08	2.36938e+08	2.82398e+08	303979472	2.44822e+08	2.14855e+08	1.88488e+08	2.19646e+08	4.17686e+07	3.36476e+07	2.18017e+07	1.04984e+07	1.1544e+07	4.94717e+06	7.84752e+06	3.21276e+07	1.90681e+08	1.81226e+08	-2.58904	1.46321e-05	-1.91207
Q9NQR4	NIT2	Omega-amidase NIT2 OS=Homo sapiens OX=9606 GN=NIT2 PE=1 SV=1	178	15	276	1.77329e+08	2.17005e+08	1.22611e+08	1.27115e+08	1.2166e+08	2.21032e+08	1.61845e+08	1.27023e+08	1.55765e+08	173395517	1.5898e+07	3.03719e+07	2.07182e+07	2.01705e+07	2.05166e+08	7.50873e+07	2.75997e+07	1.79807e+07	8.27804e+07	1.37367e+08	-1.54262	0.00121039	-1.12767
O43488	AKR7A2	Aflatoxin B1 aldehyde reductase member 2 OS=Homo sapiens OX=9606 GN=AKR7A2 PE=1 SV=3	178	11	359	2.86233e+08	2.52125e+08	108300251	1.95324e+08	1.82572e+08	3.70422e+08	2.29966e+08	2.19981e+08	204490671	2.83394e+08	9.74004e+07	6.17861e+07	37081422	5.79571e+07	2.80523e+07	3.99138e+07	1.76186e+07	3.49961e+07	1.05144e+08	2.32234e+08	-2.12911	3.50376e-05	-1.87688
Q9UI17	DMGDH	Dimethylglycine dehydrogenase, mitochondrial OS=Homo sapiens OX=9606 GN=DMGDH PE=1 SV=2	178	27	866	2.3683e+08	3.35885e+08	1.74316e+07	1.54485e+08	1.00371e+08	3.06116e+08	2.23418e+08	1.64094e+08	2.02835e+08	2.42834e+08	2.14302e+07	2.06087e+07	1.40732e+07	2.03464e+07	5.1614e+06	1.57178e+07	1.56367e+07	1.63406e+07	1.84971e+07	1.53892e+08	-3.59479	0.000882363	-1.93329
P0DOX2		Immunoglobulin alpha-2 heavy chain OS=Homo sapiens OX=9606 PE=1 SV=2	177	2	455	1.69306e+07	8.1404e+06	4.95337e+07	5.60024e+06	4.16093e+07	2.48414e+07	4.24452e+07	150166440	1.20713e+08	1.42541e+07	1.53102e+08	9.85485e+08	8.75386e+08	2.1829e+08	3.85675e+08	5.14835e+08	396623137	1.58697e+08	2.09611e+08	3.56975e+07	3.19096	0.0135684	1.14282
P08779	KRT16	Keratin, type I cytoskeletal 16 OS=Homo sapiens OX=9606 GN=KRT16 PE=1 SV=4	177	13	473	812200	9.5582e+06	1.08969e+07	1.90686e+06	1.56759e+07	7.60782e+08	1.09539e+07	1.32326e+07	1.84175e+06	2.40088e+06	77070482	3.73028e+06	5.46203e+06	2.35599e+07	1.94306e+07	3.65797e+07	5.75149e+06	1.37481e+07	3.79743e+07	8.551e+06	-1.73871	0.553043	-0.233749
Q5T2W1	PDZK1	Na(+)/H(+) exchange regulatory cofactor NHE-RF3 OS=Homo sapiens OX=9606 GN=PDZK1 PE=1 SV=2	176	20	519	4.92277e+08	6.29826e+08	3.61601e+08	3.38153e+08	3.83863e+08	4.47238e+08	4.66002e+08	5.77051e+08	5.36121e+08	4.33897e+08	2.43425e+08	2.91804e+08	2.12397e+08	196518344	132079159	4.41875e+07	3.16975e+07	3.43501e+08	3.38503e+08	4.68457e+08	-1.19511	0.000330901	-1.32242
Q9HCC0	MCCC2	Methylcrotonoyl-CoA carboxylase beta chain, mitochondrial OS=Homo sapiens OX=9606 GN=MCCC2 PE=1 SV=1	176	20	563	2.00896e+08	1.55261e+08	5.30681e+07	1.55384e+08	1.76254e+08	3.82792e+08	1.65111e+08	1.98479e+08	1.66677e+08	183397408	2.32035e+07	1.31287e+07	9.30137e+06	8.38154e+06	1.77408e+07	1.43082e+07	1.17661e+07	2.30629e+07	6.28454e+07	182993033	-3.16987	0.000167577	-1.75648
P01877	IGHA2	Immunoglobulin heavy constant alpha 2 OS=Homo sapiens OX=9606 GN=IGHA2 PE=1 SV=4	175	1	340	0	0	0	0	1.55901e+06	0	2.76811e+06	1.26616e+07	0	4.7897e+06	0	4.94844e+07	9.7237e+07	0	0	0	0	0	9.57005e+06	0	2.99527	0.289595	0.422672
P02774	GC	Vitamin D-binding protein OS=Homo sapiens OX=9606 GN=GC PE=1 SV=2	175	19	474	6.95756e+07	3.32278e+07	2.79394e+07	9.52928e+06	1.37952e+08	3.14916e+07	7.66423e+07	5.38465e+07	2.33566e+08	9.45225e+07	1.68961e+08	1.39822e+08	3.26602e+07	1.82094e+08	4.95008e+07	3.47525e+08	8.80138e+07	1.47747e+08	7.25559e+07	5.29624e+07	0.829618	0.186041	0.389992
P50990	CCT8	T-complex protein 1 subunit theta OS=Homo sapiens OX=9606 GN=CCT8 PE=1 SV=4	175	21	548	1.23963e+08	1.20923e+08	1.20752e+08	1.25914e+08	1.09343e+08	1.15631e+08	1.11017e+08	1.05857e+08	9.51882e+07	103286316	1.12677e+08	1.29057e+08	1.50728e+08	1.04992e+08	1.20226e+08	2.17621e+08	1.65347e+08	119182345	1.57099e+08	1.07952e+08	0.325968	0.0742291	0.67146
Q6NVY1	HIBCH	3-hydroxyisobutyryl-CoA hydrolase, mitochondrial OS=Homo sapiens OX=9606 GN=HIBCH PE=1 SV=2	175	17	386	3.29196e+08	381875419	1.38095e+08	3.34268e+08	202121042	5.42812e+08	3.29434e+08	372737351	3.19303e+08	4.38628e+08	5.37118e+06	1.01803e+07	0	0	0	0	0	2.80294e+06	5.27762e+07	1.63536e+08	-5.42202	7.07787e-05	-2.68971
P21695	GPD1	Glycerol-3-phosphate dehydrogenase [NAD(+)], cytoplasmic OS=Homo sapiens OX=9606 GN=GPD1 PE=1 SV=4	174	18	349	6.72896e+08	757136877	2.29758e+08	4.00673e+08	4.10855e+08	7.49984e+08	6.13233e+08	2.89855e+08	4.0018e+08	5.25693e+08	1.56424e+08	9.54717e+07	9.0643e+07	1.04335e+08	1.764e+08	1.41002e+08	1.12164e+08	8.60261e+07	1.95541e+08	4.78812e+08	-1.97271	0.000614366	-1.74381
P54819	AK2	Adenylate kinase 2, mitochondrial OS=Homo sapiens OX=9606 GN=AK2 PE=1 SV=2	174	10	239	4.02755e+08	4.25793e+08	120170521	2.2436e+08	1.93251e+08	4.67422e+08	2.98663e+08	2.95851e+08	282110475	3.43262e+08	3.04834e+07	7.26196e+07	6.97671e+07	3.93186e+07	4.65148e+07	4.15477e+07	4.91767e+07	5.50738e+07	2.19062e+08	3.25941e+08	-2.13992	0.000187095	-1.5002
P17858	PFKL	ATP-dependent 6-phosphofructokinase, liver type OS=Homo sapiens OX=9606 GN=PFKL PE=1 SV=6	173	15	780	1.83323e+08	1.2156e+08	8.20247e+07	1.10319e+08	127597326	1.40263e+08	1.3338e+08	1.38425e+08	1.39579e+08	1.34062e+08	8.16332e+07	9.96029e+07	1.00477e+08	7.74877e+07	1.19766e+08	1.48173e+08	6.74961e+07	6.75745e+07	1.22081e+08	1.24095e+08	-0.415554	0.0322764	-0.651239
P13797	PLS3	Plastin-3 OS=Homo sapiens OX=9606 GN=PLS3 PE=1 SV=4	172	7	630	4.61059e+07	5.59493e+07	6.99265e+07	4.45228e+07	3.03802e+07	4.76929e+07	5.11445e+07	59634869	3.49889e+07	5.08325e+07	7.74633e+07	3.85692e+07	3.63333e+07	6.53329e+07	3.65507e+07	2.07848e+07	1.55268e+07	103531769	4.37904e+07	5.16492e+07	-0.0136973	0.969183	-0.0123547
Q9Y696	CLIC4	Chloride intracellular channel protein 4 OS=Homo sapiens OX=9606 GN=CLIC4 PE=1 SV=4	172	15	253	1.52733e+08	2.54837e+08	5.17626e+07	1.36896e+08	1.37021e+08	1.41725e+08	1.70073e+08	1.59174e+08	1.83709e+08	1.83602e+08	5.89332e+07	4.21982e+07	1.94407e+07	1.5595e+07	9.15059e+06	1.3035e+07	3.56946e+07	3.26528e+07	6.14939e+07	1.36661e+08	-2.29506	4.19315e-05	-1.87906
P23284	PPIB	Peptidyl-prolyl cis-trans isomerase B OS=Homo sapiens OX=9606 GN=PPIB PE=1 SV=2	171	11	216	114119444	8.59737e+07	3.0624e+08	1.10208e+08	1.65925e+08	9.88557e+07	123513795	1.45466e+08	1.09351e+08	9.75705e+07	2.86829e+08	3.12391e+08	3.1892e+08	2.47674e+08	4.02927e+08	4.27013e+08	5.65864e+08	2.71462e+08	1.61335e+08	1.27087e+08	1.29362	0.00117086	1.14343
P22105	TNXB	Tenascin-X OS=Homo sapiens OX=9606 GN=TNXB PE=1 SV=5	171	49	4244	3.1788e+07	3.79671e+06	1.48156e+08	3.00924e+07	2.0504e+07	3.64078e+07	5.56733e+07	4.68932e+07	6.21547e+07	5.45896e+07	116968705	3.42766e+08	9.2541e+06	9.06494e+07	4.24566e+07	3.55302e+06	4.50764e+06	1.3793e+08	7.88712e+06	8.45181e+07	0.777392	0.464602	0.248439
Q13011	ECH1	Delta(3,5)-Delta(2,4)-dienoyl-CoA isomerase, mitochondrial OS=Homo sapiens OX=9606 GN=ECH1 PE=1 SV=2	171	12	328	4.74682e+08	5.13589e+08	1.38025e+08	3.53826e+08	1.89891e+08	5.1064e+08	2.83689e+08	3.61061e+08	2.64673e+08	3.40046e+08	4.42341e+07	6.92267e+07	8.56078e+07	2.27385e+07	7.55273e+07	8.5969e+07	8.81101e+07	6.02937e+07	2.29092e+08	3.48428e+08	-2.02067	0.000479931	-1.45579
Q9UBQ7	GRHPR	Glyoxylate reductase/hydroxypyruvate reductase OS=Homo sapiens OX=9606 GN=GRHPR PE=1 SV=1	171	14	328	3.28305e+08	3.76441e+08	1.72344e+08	1.81776e+08	2.82604e+08	4.09814e+08	2.92997e+08	3.25426e+08	318043671	4.68063e+08	7.35914e+07	8.06846e+07	7.8793e+07	4.74763e+07	1.36693e+07	3.09797e+07	4.00379e+07	4.49176e+07	1.49291e+08	3.46719e+08	-2.34395	1.87736e-05	-2.03122
P27338	MAOB	Amine oxidase [flavin-containing] B OS=Homo sapiens OX=9606 GN=MAOB PE=1 SV=3	171	15	520	283673726	282473820	7.03122e+07	1.70083e+08	1.49247e+08	281655590	2.29763e+08	1.70097e+08	2.08662e+08	2.55833e+08	6.26275e+07	5.37339e+07	9.25148e+06	3.04629e+07	1.00567e+07	0	0	1.72312e+07	8.94675e+07	2.05003e+08	-2.79354	8.4193e-05	-1.86224
P27144	AK4	Adenylate kinase 4, mitochondrial OS=Homo sapiens OX=9606 GN=AK4 PE=1 SV=1	171	12	223	6.23865e+08	6.50546e+08	1.20175e+08	3.83537e+08	2.17849e+08	6.62149e+08	4.03862e+08	4.30669e+08	3.9497e+08	6.09042e+08	0	9.54015e+06	1.93815e+06	6.87364e+06	3.80677e+06	1.04832e+07	1.79461e+06	1.87258e+06	2.01859e+08	4.98105e+08	-4.0868	0.000231454	-1.76974
P60660	MYL6	Myosin light polypeptide 6 OS=Homo sapiens OX=9606 GN=MYL6 PE=1 SV=2	170	11	151	3.36894e+08	3.61841e+08	5.36411e+08	2.85905e+08	3.35847e+08	3.05912e+08	3.35393e+08	3.42741e+08	3.03153e+08	5.96335e+08	1210374946	7.70016e+08	4.92805e+08	6.42686e+08	8.74436e+08	6.58772e+08	712353164	8.34152e+08	4.18426e+08	3.90218e+08	0.974326	0.00147253	1.13486
P48047	ATP5PO	ATP synthase subunit O, mitochondrial OS=Homo sapiens OX=9606 GN=ATP5PO PE=1 SV=1	170	11	213	3.37221e+08	2.53488e+08	1.39512e+08	2.29512e+08	2.9322e+08	364560553	3.03211e+08	3.57088e+08	2.69431e+08	3.04546e+08	8.37108e+07	9.72309e+07	9.0643e+07	5.50687e+07	6.68033e+07	9.42981e+07	7.27956e+07	7.52944e+07	1.53492e+08	2.89627e+08	-1.70115	1.05351e-05	-2.18819
P13804	ETFA	Electron transfer flavoprotein subunit alpha, mitochondrial OS=Homo sapiens OX=9606 GN=ETFA PE=1 SV=1	170	13	333	3.45699e+08	3.78865e+08	1.05611e+08	2.92202e+08	2.43497e+08	411795213	2.47972e+08	3.07825e+08	2.41082e+08	3.18119e+08	3.03317e+07	4.72214e+07	4.75652e+07	1.53383e+07	8.64881e+06	2.80507e+07	5.02011e+07	2.67143e+07	1.1327e+08	2.63216e+08	-2.82521	4.44043e-05	-2.23761
P01833	PIGR	Polymeric immunoglobulin receptor OS=Homo sapiens OX=9606 GN=PIGR PE=1 SV=4	169	25	764	3.66585e+07	2.18079e+07	1.31929e+08	4.89949e+07	1.88709e+07	1.19974e+07	5.78911e+07	190110086	2.63704e+07	5.38198e+06	5.91417e+07	1271314847	1656323212	4.43678e+07	5.31479e+08	7.55899e+06	5.54325e+06	2.4149e+08	264205650	4.66114e+07	3.04354	0.131581	0.635827
Q15084	PDIA6	Protein disulfide-isomerase A6 OS=Homo sapiens OX=9606 GN=PDIA6 PE=1 SV=1	169	13	440	9.12469e+07	9.28588e+07	1.56855e+08	100527078	1.02202e+08	7.92101e+07	8.82974e+07	1.24056e+08	7.19847e+07	6.9397e+07	2.29827e+08	2.86254e+08	3.25821e+08	1.54042e+08	2.85642e+08	3.19016e+08	5.98124e+08	1.89021e+08	1.64462e+08	1.00594e+08	1.53786	0.00852605	1.22557
P08473	MME	Neprilysin OS=Homo sapiens OX=9606 GN=MME PE=1 SV=2	169	24	750	4.11449e+08	554686709	1.06912e+08	1.90746e+08	1.08727e+08	3.70475e+08	3.37223e+08	1.7606e+08	263422758	3.12781e+08	0	1.17957e+07	0	0	9.77355e+06	0	7.52043e+06	0	7.78697e+07	2.45028e+08	-4.57493	0.000878172	-1.70424
P62328	TMSB4X	Thymosin beta-4 OS=Homo sapiens OX=9606 GN=TMSB4X PE=1 SV=2	167	9	44	216636651	2.74628e+08	6.75302e+08	2.01938e+08	2.32731e+08	1.43221e+08	1.65621e+08	9.85709e+07	1.33568e+08	1.49847e+08	6.88559e+08	7.35374e+08	2088246285	9.39656e+08	6.54424e+08	423558726	1078320357	5.18221e+08	8.83671e+08	2.38759e+08	1.95716	0.00320509	1.06197
P0DOX6		Immunoglobulin mu heavy chain OS=Homo sapiens OX=9606 PE=1 SV=2	167	1	576	0	0	1.65648e+06	0	0	0	0	0	8.72394e+06	0	0	3.15784e+06	0	8.74958e+06	3.36348e+06	0	0	0	0	0	0.708922	0.681878	0.121174
P21796	VDAC1	Voltage-dependent anion-selective channel protein 1 OS=Homo sapiens OX=9606 GN=VDAC1 PE=1 SV=2	167	14	283	2.04834e+08	1.34388e+08	5.51698e+07	1.2325e+08	1.64506e+08	1.79093e+08	201207277	1.32661e+08	1.27149e+08	1.7176e+08	7.2204e+07	56134485	9.62034e+07	2.9197e+07	3.97277e+07	7.35174e+07	7.56126e+07	5.08707e+07	1.8668e+08	2.14303e+08	-0.983276	0.00721987	-0.85776
P09622	DLD	Dihydrolipoyl dehydrogenase, mitochondrial OS=Homo sapiens OX=9606 GN=DLD PE=1 SV=2	167	18	509	2.68713e+08	2.68258e+08	1.32675e+08	2.34733e+08	2.70495e+08	2.63454e+08	2.56419e+08	2.6766e+08	2.32061e+08	2.52704e+08	3.71e+07	4.32566e+07	4.44017e+07	1.98723e+07	1.67256e+07	1.02666e+08	4.08786e+07	6.98202e+07	1.33795e+08	263198816	-2.11475	1.52756e-06	-2.46528
P40121	CAPG	Macrophage-capping protein OS=Homo sapiens OX=9606 GN=CAPG PE=1 SV=2	166	13	348	7.34837e+07	65095930	2.01261e+08	8.41219e+07	1.09852e+08	4.20137e+07	9.07235e+07	6.30409e+07	9.96923e+07	8.08593e+07	1.3883e+08	2.07685e+08	5.15766e+08	1.38516e+08	404362438	8.89956e+08	1035659839	1.66205e+08	1.37685e+08	1.012e+08	2.14966	0.0502623	0.852978
P23246	SFPQ	Splicing factor, proline- and glutamine-rich OS=Homo sapiens OX=9606 GN=SFPQ PE=1 SV=2	166	18	707	8.09162e+07	6.89501e+07	1.38585e+08	9.39993e+07	8.58177e+07	7.36498e+07	7.06834e+07	7.85003e+07	7.69841e+07	6.86e+07	1.42872e+08	185045629	1.8512e+08	2.06157e+08	1.61225e+08	1.29239e+08	1.38997e+08	1.43121e+08	1.20461e+08	9.44658e+07	0.907228	8.67205e-05	1.54688
P62873	GNB1	Guanine nucleotide-binding protein G(I)/G(S)/G(T) subunit beta-1 OS=Homo sapiens OX=9606 GN=GNB1 PE=1 SV=3	166	7	340	9.39563e+07	1.15497e+08	1.38788e+08	1.33102e+08	1.80945e+08	1.10244e+08	1.1435e+08	1.25109e+08	1.07113e+08	9.71634e+07	2.23706e+08	2.04679e+08	225494858	1.94808e+08	2.42228e+08	298752933	3.0644e+08	1.55255e+08	1.29772e+08	1.05771e+08	0.855871	0.000787959	1.24409
P30613	PKLR	Pyruvate kinase PKLR OS=Homo sapiens OX=9606 GN=PKLR PE=1 SV=2	166	21	574	1.55404e+08	1.73718e+08	3.10772e+07	1.08004e+08	1.22192e+08	2.2135e+08	1.17102e+08	7.0375e+07	8.87158e+07	1.15522e+08	5.07592e+06	0	0	0	0	4.41773e+06	0	0	3.48797e+07	1.03241e+08	-4.60935	0.00041847	-1.87082
P31943	HNRNPH1	Heterogeneous nuclear ribonucleoprotein H OS=Homo sapiens OX=9606 GN=HNRNPH1 PE=1 SV=4	165	7	449	9.94005e+07	7.46549e+07	167852976	9.12752e+07	6.936e+07	6.55377e+07	8.18404e+07	9.80402e+07	8.60444e+07	7.77993e+07	2.15545e+08	2.10471e+08	2.1784e+08	2.17351e+08	1.77845e+08	1.65989e+08	1.63379e+08	1.87083e+08	1.39442e+08	1.07365e+08	1.04644	2.66964e-05	1.77442
Q14103	HNRNPD	Heterogeneous nuclear ribonucleoprotein D0 OS=Homo sapiens OX=9606 GN=HNRNPD PE=1 SV=1	164	9	355	8.0786e+07	6.38198e+07	1.68788e+08	8.04209e+07	4.76647e+07	5.12859e+07	9.24622e+07	7.86014e+07	6.95008e+07	6.99317e+07	2.06937e+08	204962340	2.58782e+08	1.77669e+08	1.48591e+08	7.69504e+07	1.18106e+08	1.89199e+08	1.28333e+08	8.94443e+07	1.06216	0.00223015	1.03692
P35558	PCK1	Phosphoenolpyruvate carboxykinase, cytosolic [GTP] OS=Homo sapiens OX=9606 GN=PCK1 PE=1 SV=3	164	18	622	1.48352e+08	3.38592e+08	4.52324e+07	4.99731e+07	9.38475e+07	4.4229e+08	1.07497e+08	1.55569e+08	2.12702e+08	1.90668e+08	3.54983e+06	0	4.86299e+06	0	8.76982e+06	0	0	0	9.92376e+07	1.46355e+08	-3.78628	0.00696159	-1.09743
Q6IB77	GLYAT	Glycine N-acyltransferase OS=Homo sapiens OX=9606 GN=GLYAT PE=1 SV=3	164	13	296	5.86325e+08	5.61092e+08	6.1096e+07	2.38831e+08	1.18847e+08	3.88599e+08	3.72633e+08	3.11426e+08	3.45067e+08	4.30039e+08	0	5.47724e+06	0	2.16506e+06	3.13378e+07	9.49587e+06	0	0	1.66719e+08	3.38083e+08	-3.83572	0.000820345	-1.49571
P51911	CNN1	Calponin-1 OS=Homo sapiens OX=9606 GN=CNN1 PE=1 SV=2	163	15	297	5.6036e+07	4.37642e+07	1.70372e+08	1.52219e+08	5.30478e+07	3.3193e+07	2.85985e+07	7.2557e+07	1.4777e+08	8.96961e+08	1426609981	3.12187e+08	1.48044e+07	4.43125e+08	4.5437e+07	1.81097e+08	1.10275e+08	7.10687e+08	1.79033e+07	6.2031e+07	1.13141	0.334449	0.288233
P02538	KRT6A	Keratin, type II cytoskeletal 6A OS=Homo sapiens OX=9606 GN=KRT6A PE=1 SV=3	163	3	564	4.09274e+07	85712504	138286614	5.79393e+07	8.6197e+07	7.28735e+08	7.42143e+07	1.10241e+08	7.80061e+07	7.2175e+07	3.80743e+08	189945675	1.22652e+08	2.2478e+08	2.8268e+08	3.53491e+08	1.13616e+08	1.51221e+08	1.01061e+08	8.96211e+07	0.535049	0.475132	0.22468
P61604	HSPE1	10 kDa heat shock protein, mitochondrial OS=Homo sapiens OX=9606 GN=HSPE1 PE=1 SV=2	162	14	102	8.82495e+08	1066408660	2.66592e+08	3.77558e+08	3.75452e+08	5.32023e+08	5.21728e+08	3.79976e+08	3.14124e+08	5.1912e+08	1.39158e+08	1.08707e+08	1.83879e+08	7.36928e+07	6.10137e+07	8.96205e+07	1.13242e+08	1.04521e+08	3.64147e+08	4.01243e+08	-1.92833	0.00208919	-1.16442
P36957	DLST	Dihydrolipoyllysine-residue succinyltransferase component of 2-oxoglutarate dehydrogenase complex, mitochondrial OS=Homo sapiens OX=9606 GN=DLST PE=1 SV=4	162	15	453	3.14345e+08	2.52044e+08	1.05539e+08	1.87669e+08	2.50136e+08	3.722e+08	1.97786e+08	2.88114e+08	2.58084e+08	3.18899e+08	2.8629e+07	5.51593e+07	3.73769e+07	2.9174e+07	2.38591e+07	5.05253e+07	4.53716e+07	4.02774e+07	9.59229e+07	298946102	-2.49496	7.79449e-05	-2.25058
P53675	CLTCL1	Clathrin heavy chain 2 OS=Homo sapiens OX=9606 GN=CLTCL1 PE=1 SV=2	162	1	1640	2.99614e+06	3.32124e+06	2.19098e+06	4.01774e+06	5.11748e+06	8.79132e+06	8.26662e+06	0	4.72249e+06	0	0	0	1.89664e+06	0	0	2.27595e+06	0	0	0	2.87854e+06	-3.08806	0.0124462	-0.941737
Q9H2M3	BHMT2	S-methylmethionine--homocysteine S-methyltransferase BHMT2 OS=Homo sapiens OX=9606 GN=BHMT2 PE=1 SV=1	162	12	363	7.38417e+07	1.11858e+08	2.72912e+07	5.5604e+07	4.19229e+07	1.32205e+08	5.28364e+07	7.27034e+07	5.87694e+07	9.65717e+07	0	0	2.43071e+06	1.51967e+06	3.96749e+07	1.26154e+07	3.61526e+06	0	1.302e+07	4.39706e+07	-3.15968	0.000546668	-1.49268
P08603	CFH	Complement factor H OS=Homo sapiens OX=9606 GN=CFH PE=1 SV=4	161	24	1231	6.90357e+07	3.79846e+07	8.58154e+07	3.10393e+07	1.4458e+08	7.89854e+07	9.68342e+07	6.25101e+07	2.55897e+08	7.82856e+07	2.18858e+08	1.27221e+08	1.19056e+08	3.74124e+08	2.10317e+08	3.15914e+08	2.21963e+08	2.85171e+08	1.00103e+08	5.72917e+07	1.21998	0.009139	0.833101
Q9Y2S2	CRYL1	Lambda-crystallin homolog OS=Homo sapiens OX=9606 GN=CRYL1 PE=1 SV=3	161	16	319	3.74205e+08	635954122	2.12601e+08	329404638	3.3672e+08	7.10338e+08	4.1627e+08	4.39227e+08	3.86776e+08	3.77509e+08	2.09307e+07	4.1605e+07	8.36581e+07	2.42306e+07	8.83501e+07	3.73791e+08	3.94717e+07	2.23984e+07	1.4242e+08	2.88327e+08	-2.18185	0.000343309	-1.33814
Q07065	CKAP4	Cytoskeleton-associated protein 4 OS=Homo sapiens OX=9606 GN=CKAP4 PE=1 SV=2	160	14	602	2.25682e+07	1.20131e+07	6.67574e+07	3.80285e+07	3.30138e+07	1.73218e+07	2.54804e+07	3.01716e+07	3.60716e+07	3.29546e+07	1.67321e+08	2.00949e+08	1.23887e+08	1.55822e+08	1.5035e+08	1.8771e+08	3.28141e+08	1.39284e+08	6.4035e+07	4.59101e+07	2.42311	0.00156056	1.67696
P36578	RPL4	60S ribosomal protein L4 OS=Homo sapiens OX=9606 GN=RPL4 PE=1 SV=5	160	15	427	9.72158e+07	1.05831e+08	1.16938e+08	1.29696e+08	111525638	1.07318e+08	1.14541e+08	1.05266e+08	8.0587e+07	9.69124e+07	1.41661e+08	2.00659e+08	1.78046e+08	1.40445e+08	1.9515e+08	1.71907e+08	2.73664e+08	1.70829e+08	1.18491e+08	1.15012e+08	0.729825	0.00450989	1.27201
Q14624	ITIH4	Inter-alpha-trypsin inhibitor heavy chain H4 OS=Homo sapiens OX=9606 GN=ITIH4 PE=1 SV=4	160	16	930	5.63714e+07	9.62176e+06	4.77671e+07	1.03971e+06	1.335e+08	6.15097e+06	2.52475e+07	23191239	2.22163e+08	7.15967e+07	1.35423e+08	5.04845e+07	5.64833e+07	1.84044e+08	3.92956e+07	1.22983e+08	2.16548e+07	1.36816e+08	6.58205e+07	2.39159e+07	0.598384	0.381314	0.259207
O95865	DDAH2	N(G),N(G)-dimethylarginine dimethylaminohydrolase 2 OS=Homo sapiens OX=9606 GN=DDAH2 PE=1 SV=1	160	12	285	4.71436e+07	5.22671e+07	1.14513e+08	6.58684e+07	9.97029e+07	5.95531e+07	6.89675e+07	5.50613e+07	6.72304e+07	6.74605e+07	1.72473e+08	1.18279e+08	9.79155e+07	1.36238e+08	4.97333e+07	1.24918e+07	1.43456e+07	6.04595e+07	1.73471e+07	6.04978e+07	0.113267	0.826149	0.0756394
P29692	EEF1D	Elongation factor 1-delta OS=Homo sapiens OX=9606 GN=EEF1D PE=1 SV=5	159	8	281	1.14257e+08	9.70866e+07	1.34616e+08	1.10637e+08	1.23518e+08	9.95954e+07	9.79962e+07	9.97284e+07	7.51741e+07	9.04769e+07	1.33402e+08	1.8975e+08	2.18038e+08	1.40664e+08	2.27722e+08	1.97205e+08	3.46557e+08	161970156	1.50985e+08	1.1519e+08	0.911871	0.00771532	1.17997
O95154	AKR7A3	Aflatoxin B1 aldehyde reductase member 3 OS=Homo sapiens OX=9606 GN=AKR7A3 PE=1 SV=2	159	9	331	2.69775e+08	2.22885e+08	5.47266e+07	1.80204e+08	1.34374e+08	351730680	2.22799e+08	2.28425e+08	2.02768e+08	3.11283e+08	0	1.03231e+06	2.70722e+06	1.96291e+06	1.03919e+08	13914432	0	0	7.75751e+07	2.31821e+08	-3.28558	8.98752e-05	-1.66048
P06454	PTMA	Prothymosin alpha OS=Homo sapiens OX=9606 GN=PTMA PE=1 SV=2	158	8	111	1.02387e+08	167680910	2.88065e+08	98171082	1.84152e+08	1.08382e+08	7.66274e+07	6.86812e+07	6.42936e+07	6.23343e+07	2.89809e+08	2.1212e+08	6.15949e+08	3.0547e+08	6.30354e+08	2.44681e+08	3.76175e+08	1.6181e+08	1.56683e+08	9.12279e+07	1.44582	0.0178735	0.889099
Q14240	EIF4A2	Eukaryotic initiation factor 4A-II OS=Homo sapiens OX=9606 GN=EIF4A2 PE=1 SV=2	158	3	407	1.14447e+07	4.60883e+06	1.28563e+07	6.68296e+06	6.45698e+06	1.15701e+07	1.16415e+07	1.17544e+07	1.24004e+07	8.81284e+06	9.41146e+06	1.10041e+07	3.91731e+06	1.02972e+07	9.70177e+06	4.49742e+06	2.02488e+06	9.94383e+06	4.12593e+06	1.12728e+07	-0.445395	0.144315	-0.429417
Q12931	TRAP1	Heat shock protein 75 kDa, mitochondrial OS=Homo sapiens OX=9606 GN=TRAP1 PE=1 SV=3	158	17	704	7.3943e+07	1.01334e+08	3.37528e+07	8.75951e+07	6.74248e+07	1.21634e+08	6.3676e+07	9.36507e+07	9.93562e+07	1.03584e+08	0	1.49804e+07	4.66519e+06	17136907	1.09569e+07	2.31995e+07	3.27926e+07	1.09145e+07	3.42043e+07	1.1425e+08	-2.35471	2.46187e-05	-1.94207
P12235	SLC25A4	ADP/ATP translocase 1 OS=Homo sapiens OX=9606 GN=SLC25A4 PE=1 SV=4	158	5	298	2.63491e+07	2.02687e+07	1.23505e+07	2.59621e+07	4.15496e+07	2.20886e+07	3.10183e+07	4.26884e+07	3.05686e+07	2.35121e+07	0	1.55984e+06	0	0	0	0	0	1.27188e+06	4.47408e+06	2.16496e+07	-5.08934	7.79449e-05	-2.61608
Q15907	RAB11B	Ras-related protein Rab-11B OS=Homo sapiens OX=9606 GN=RAB11B PE=1 SV=4	157	11	218	9.32561e+07	1.07954e+08	9.78209e+07	1.002e+08	1.09449e+08	9.4653e+07	8.7496e+07	8.30917e+07	7.44647e+07	8.64384e+07	7.93017e+07	8.95762e+07	1.08086e+08	6.54904e+07	1.44733e+08	1.15666e+08	9.81247e+07	7.73229e+07	9.72386e+07	8.51502e+07	0.057481	0.708705	0.115942
P07954	FH	Fumarate hydratase, mitochondrial OS=Homo sapiens OX=9606 GN=FH PE=1 SV=3	157	15	510	2.08917e+08	203681528	7.67597e+07	1.77646e+08	2.09191e+08	211731097	1.9668e+08	2.23755e+08	1.75555e+08	2.01977e+08	1.82159e+07	4.37041e+07	5.07653e+07	1.94445e+07	1.7117e+07	1.74608e+07	4.75436e+07	2.99661e+07	1.03078e+08	220147096	-2.28901	4.00449e-06	-2.27121
Q16853	AOC3	Membrane primary amine oxidase OS=Homo sapiens OX=9606 GN=AOC3 PE=1 SV=3	156	15	763	7.91462e+07	3.35947e+07	9.66471e+07	1.64974e+08	8.74694e+07	8.5029e+07	1.26744e+08	1.19546e+08	1.81433e+08	223868395	5.1149e+08	3.4033e+08	5.95205e+07	1.16701e+08	2.9525e+07	4.70132e+07	4.75729e+07	1.56906e+08	4.94121e+07	1.111e+08	0.332815	0.668272	0.147714
P08865	RPSA	40S ribosomal protein SA OS=Homo sapiens OX=9606 GN=RPSA PE=1 SV=4	155	10	295	1.14412e+08	108359372	194606636	1.42075e+08	1.25852e+08	1.54375e+08	1.22204e+08	1.3547e+08	9.89456e+07	1.10512e+08	2.10581e+08	2.71971e+08	308133574	2.19528e+08	4.0089e+08	3.13516e+08	5.04445e+08	228638087	1.86085e+08	1.48408e+08	1.16856	0.0042036	1.31626
P23142	FBLN1	Fibulin-1 OS=Homo sapiens OX=9606 GN=FBLN1 PE=1 SV=4	154	20	703	1.05378e+07	1.19077e+07	7.00377e+07	2.99623e+07	1.43378e+07	5.36589e+06	2.25604e+07	4.79663e+07	1.77002e+07	2.96276e+07	1.97669e+08	7.6197e+07	5.50197e+07	9.74937e+08	1.88736e+08	6.42234e+08	9.56329e+08	1.7753e+08	7.10407e+07	2.57704e+07	3.83512	0.0501003	0.914002
P50454	SERPINH1	Serpin H1 OS=Homo sapiens OX=9606 GN=SERPINH1 PE=1 SV=2	154	12	418	3.70633e+07	2.92539e+07	154671956	8.61891e+07	6.25008e+07	1.62357e+07	2.58775e+07	3.73849e+07	2.95608e+07	3.01684e+07	276927202	1.08842e+08	160543927	1.99317e+08	4.82388e+08	1.75398e+08	4.26261e+08	2.77559e+08	1.36995e+08	4.42121e+07	2.29275	0.00493504	1.22302
P07910	HNRNPC	Heterogeneous nuclear ribonucleoproteins C1/C2 OS=Homo sapiens OX=9606 GN=HNRNPC PE=1 SV=4	154	14	306	1.96563e+08	2.11067e+08	3.32835e+08	2.15315e+08	2.43653e+08	1.99539e+08	2.03301e+08	2.11804e+08	1.95898e+08	1.59738e+08	3.63566e+08	3.67189e+08	5.72399e+08	4.02688e+08	4.24157e+08	3.47233e+08	4.0169e+08	3.75269e+08	2.66718e+08	2.33538e+08	0.850446	0.00018634	1.44883
P02753	RBP4	Retinol-binding protein 4 OS=Homo sapiens OX=9606 GN=RBP4 PE=1 SV=3	154	12	201	2.11715e+08	7.124e+08	9.62396e+07	1.12748e+08	2.89799e+08	1.63957e+08	2.7512e+08	7.21768e+07	1.2776e+08	1.83955e+08	8.00407e+07	3.47178e+07	1.09888e+08	6.63765e+07	2.06138e+08	3.93095e+07	3.7803e+07	5.17731e+07	4.68321e+07	1.21289e+08	-1.58685	0.0602636	-0.656061
P09210	GSTA2	Glutathione S-transferase A2 OS=Homo sapiens OX=9606 GN=GSTA2 PE=1 SV=4	154	3	222	2972751669	3077694631	184552122	7.65278e+08	9.26538e+08	2718305286	2381244196	1051739063	950399850	2026432709	4.06313e+08	1.76651e+08	5.02764e+08	2.99026e+08	2.1295e+08	358573718	459499087	2.14443e+08	3.64723e+08	1761117978	-2.35759	0.00705928	-1.24537
P00747	PLG	Plasminogen OS=Homo sapiens OX=9606 GN=PLG PE=1 SV=2	153	21	810	6.00255e+07	1.97496e+07	9.05887e+07	3.86338e+06	1.03014e+08	2.89269e+07	6.96103e+07	7.49582e+07	1.83818e+08	1.07159e+08	1.57519e+08	1.13528e+08	4.29665e+07	1.98318e+08	1.20807e+08	8.74576e+08	6.43819e+07	200220031	13167183	3.47535e+07	1.41939	0.221199	0.419279
P78527	PRKDC	DNA-dependent protein kinase catalytic subunit OS=Homo sapiens OX=9606 GN=PRKDC PE=1 SV=3	153	36	4128	4.18241e+07	2.82052e+07	7.73713e+07	5.00084e+07	3.87969e+07	3.92316e+07	4.77091e+07	3.59122e+07	3.31743e+07	2.3775e+07	5.56352e+07	1.23949e+08	1.33007e+08	9.19372e+07	6.46887e+07	4.40482e+07	5.65091e+07	6.75605e+07	6.56544e+07	4.12368e+07	0.908894	0.01957	0.834567
Q86TX2	ACOT1	Acyl-coenzyme A thioesterase 1 OS=Homo sapiens OX=9606 GN=ACOT1 PE=1 SV=1	153	13	421	1.46871e+08	153467403	4.63614e+07	144762838	1.04648e+08	1.90964e+08	1.72183e+08	1.52808e+08	1.42379e+08	1.8807e+08	5.01684e+06	7.04643e+06	0	4.40946e+06	1.20373e+07	8.75458e+06	0	9.17378e+06	4.37862e+07	175004130	-3.84692	4.00449e-06	-2.54312
P16662	UGT2B7	UDP-glucuronosyltransferase 2B7 OS=Homo sapiens OX=9606 GN=UGT2B7 PE=1 SV=2	153	13	529	3.41452e+08	3.28636e+08	6.2399e+07	1.62818e+08	9.38792e+07	1.79506e+08	2.48055e+08	1.32537e+08	1.0796e+08	2.47907e+08	0	0	0	0	1.66509e+07	0	0	0	3.78862e+07	2.38602e+08	-4.97452	0.000921223	-1.76107
Q71UI9	H2AZ2	Histone H2A.V OS=Homo sapiens OX=9606 GN=H2AFV PE=1 SV=3	152	3	128	3.24741e+07	2.80463e+07	9.40188e+07	3.16082e+07	2.77607e+07	3.15793e+07	4.34781e+07	4.42757e+07	4.33295e+07	3.46885e+07	1.15606e+08	155859264	1.13556e+08	1.46703e+08	8.62539e+07	1.04994e+08	9.41158e+07	105989866	5.2505e+07	5.27484e+07	1.39822	0.000215445	1.40911
P17987	TCP1	T-complex protein 1 subunit alpha OS=Homo sapiens OX=9606 GN=TCP1 PE=1 SV=1	152	16	556	8.03291e+07	8.19047e+07	5.00791e+07	7.85058e+07	5.43372e+07	5.91768e+07	6.9024e+07	7.17925e+07	6.0399e+07	6.70283e+07	6.98587e+07	6.93467e+07	8.83805e+07	6.70092e+07	2.22089e+07	94964668	6.73552e+07	7.46509e+07	1.17303e+08	7.51303e+07	0.148785	0.502158	0.209485
P12277	CKB	Creatine kinase B-type OS=Homo sapiens OX=9606 GN=CKB PE=1 SV=1	152	12	381	1.43839e+08	1.68509e+08	1.63375e+08	2.65491e+08	4.38057e+08	1.86956e+08	1.53974e+08	3.92084e+08	2.42959e+08	2.89329e+08	3.487e+08	1.24221e+08	6.94843e+07	1.29858e+08	2.13617e+07	6.21522e+06	4.39411e+06	1.37789e+08	6.8633e+07	2.57049e+08	-1.2726	0.0193028	-0.722671
P37837	TALDO1	Transaldolase OS=Homo sapiens OX=9606 GN=TALDO1 PE=1 SV=2	151	10	337	9.43072e+07	1.07406e+08	1.18758e+08	7.11982e+07	8.98229e+07	9.7569e+07	8.51035e+07	7.6136e+07	8.87978e+07	7.98163e+07	1.57436e+08	1.48173e+08	1.50708e+08	1.55226e+08	1.26864e+08	2.16052e+08	2.09973e+08	1.15349e+08	1.21709e+08	1.01609e+08	0.776746	0.000422426	1.36498
P30153	PPP2R1A	Serine/threonine-protein phosphatase 2A 65 kDa regulatory subunit A alpha isoform OS=Homo sapiens OX=9606 GN=PPP2R1A PE=1 SV=4	151	15	589	6.74181e+07	9.03377e+07	8.4951e+07	9.49045e+07	5.56048e+07	6.96951e+07	8.29854e+07	7.96643e+07	7.14398e+07	7.04158e+07	1.21302e+08	1.30037e+08	7.74835e+07	1.25189e+08	4.97239e+07	8.01796e+07	8.29791e+07	1.0197e+08	1.01012e+08	6.88732e+07	0.332802	0.103302	0.548679
P55786	NPEPPS	Puromycin-sensitive aminopeptidase OS=Homo sapiens OX=9606 GN=NPEPPS PE=1 SV=2	151	15	919	7.48003e+07	8.24598e+07	1.04057e+08	8.03751e+07	7.16701e+07	7.60893e+07	7.15973e+07	6.89096e+07	6.50725e+07	7.49179e+07	8.53247e+07	7.88676e+07	8.15206e+07	8.29507e+07	7.13958e+07	8.32595e+07	5.87706e+07	8.04523e+07	8.28044e+07	7.29699e+07	0.0255723	0.803493	0.0759493
P00918	CA2	Carbonic anhydrase 2 OS=Homo sapiens OX=9606 GN=CA2 PE=1 SV=2	151	12	260	4.09999e+08	5.56214e+08	1.88093e+08	2.73013e+08	2.43784e+08	3.05379e+08	3.5075e+08	2.06734e+08	2.21589e+08	2.68269e+08	6.81965e+07	3.68854e+07	5.9237e+07	0	0	2.26204e+08	0	7.05973e+06	1.59158e+08	2.14959e+08	-2.28929	0.000393861	-1.32275
P09104	ENO2	Gamma-enolase OS=Homo sapiens OX=9606 GN=ENO2 PE=1 SV=3	150	4	434	6.67493e+06	7.04447e+06	2.67103e+07	1.43633e+07	2.9069e+07	3.1572e+07	1.7566e+07	1.38884e+07	9.24856e+06	9.40822e+06	2.78839e+07	1.32596e+07	1.34545e+07	1.43073e+07	8.22045e+07	3.31364e+07	2.48255e+07	1.08424e+07	5.16487e+06	6.81018e+06	0.59521	0.378102	0.274339
Q06323	PSME1	Proteasome activator complex subunit 1 OS=Homo sapiens OX=9606 GN=PSME1 PE=1 SV=1	149	11	249	7.58548e+07	8.39385e+07	9.44948e+07	7.40847e+07	7.43058e+07	7.51374e+07	6.83853e+07	6.65817e+07	6.45325e+07	6.88764e+07	1.06034e+08	1.876e+08	2.07385e+08	130737642	256458000	1.7117e+08	2.24702e+08	1.62092e+08	1.50614e+08	1.02539e+08	1.24956	0.000797912	1.94294
P61981	YWHAG	14-3-3 protein gamma OS=Homo sapiens OX=9606 GN=YWHAG PE=1 SV=2	149	6	247	2.65171e+07	3.64654e+07	5.20524e+07	3.44868e+07	2.54636e+07	42148636	3.55571e+07	3.0832e+07	2.90416e+07	2.83344e+07	5.94727e+07	4.77067e+07	4.58835e+07	5.24145e+07	4.33958e+07	3.87103e+07	6.03975e+07	5.16407e+07	5.81743e+07	3.45715e+07	0.577364	0.00109747	1.12816
P08263	GSTA1	Glutathione S-transferase A1 OS=Homo sapiens OX=9606 GN=GSTA1 PE=1 SV=3	148	2	222	8.5334e+07	7.19597e+07	0	1.88861e+07	2.09447e+07	4.47472e+07	7.04758e+07	2.31134e+07	3.5368e+07	4.98579e+07	0	0	0	0	0	0	0	0	0	4.0268e+07	-inf	0.00319922	-1.61352
P23528	CFL1	Cofilin-1 OS=Homo sapiens OX=9606 GN=CFL1 PE=1 SV=3	148	6	166	242391946	2.41302e+08	3.59039e+08	290397784	2.82496e+08	280334233	2.65304e+08	2.30218e+08	1.80894e+08	1.90211e+08	3.987e+08	4.5679e+08	9.02454e+08	4.33118e+08	1100577380	7.57467e+08	6.58664e+08	5.29721e+08	4.1748e+08	2.38116e+08	1.29392	0.00559177	1.31664
Q14112	NID2	Nidogen-2 OS=Homo sapiens OX=9606 GN=NID2 PE=1 SV=3	148	17	1375	3.39062e+07	2.84808e+07	1.79033e+08	3.49068e+07	1.53492e+07	4.36144e+07	6.30247e+07	8.35583e+07	5.40873e+07	3.50935e+07	1.93234e+08	169577217	1.1501e+08	2.27998e+08	6.10978e+07	2.96762e+07	9.13483e+06	1.73452e+08	8.16169e+07	9.51718e+07	1.04545	0.10202	0.517592
P14314	PRKCSH	Glucosidase 2 subunit beta OS=Homo sapiens OX=9606 GN=PRKCSH PE=1 SV=2	148	11	528	7.3655e+07	7.59499e+07	9.14433e+07	5.3952e+07	5.76493e+07	6.08405e+07	5.9318e+07	7.28232e+07	6.70692e+07	7.12485e+07	1.16539e+08	1.47348e+08	1.24772e+08	1.11479e+08	1.07563e+08	1.13815e+08	1.77431e+08	1.04596e+08	8.46405e+07	7.52385e+07	0.821967	0.000235565	1.45974
P00488	F13A1	Coagulation factor XIII A chain OS=Homo sapiens OX=9606 GN=F13A1 PE=1 SV=4	147	18	732	2.03082e+07	2.0093e+07	5.24428e+07	5.222e+07	3.65324e+07	1.21621e+07	1.87e+07	1.50033e+07	2.78814e+07	2.14524e+07	1.90124e+08	2.48019e+08	1.51639e+08	8.79211e+07	2.0773e+08	3.05244e+07	1.55772e+08	4.0023e+08	238405979	9.12197e+07	2.77942	0.00510742	1.43473
P00450	CP	Ceruloplasmin OS=Homo sapiens OX=9606 GN=CP PE=1 SV=1	147	15	1065	4.79112e+07	1.27547e+07	5.5883e+07	8.67975e+06	3.17722e+08	2.49604e+07	4.21174e+07	3.54148e+07	2.92957e+08	7.31608e+07	1.99925e+08	1.01918e+08	5.05228e+07	1.71243e+08	2.5568e+08	4.09278e+08	1.27223e+08	256598568	1.20506e+08	2.60839e+07	1.04508	0.121673	0.460402
P36871	PGM1	Phosphoglucomutase-1 OS=Homo sapiens OX=9606 GN=PGM1 PE=1 SV=3	147	15	562	9.33258e+07	1.23834e+08	6.78985e+07	9.96096e+07	1.19828e+08	8.90304e+07	8.75046e+07	7.47758e+07	8.43884e+07	9.79859e+07	5.07113e+07	3.95852e+07	4.71544e+07	6.3216e+07	6.06448e+06	7.33091e+07	4.83115e+07	3.35364e+07	6.134e+07	6.93258e+07	-0.996428	0.000320449	-1.32552
Q8NBS9	TXNDC5	Thioredoxin domain-containing protein 5 OS=Homo sapiens OX=9606 GN=TXNDC5 PE=1 SV=2	146	12	432	30221174	1.83626e+07	8.83396e+07	3.83565e+07	4.23853e+07	2.55752e+07	3.28904e+07	3.28964e+07	3.1063e+07	3.02512e+07	2.16303e+08	1.98333e+08	4.02858e+08	9.0599e+07	229881680	2.18936e+08	5.08658e+08	2.0878e+08	9.63472e+07	7.33347e+07	2.70323	0.00555212	1.40494
P38159	RBMX	RNA-binding motif protein, X chromosome OS=Homo sapiens OX=9606 GN=RBMX PE=1 SV=3	146	13	391	6.00088e+07	6.58208e+07	8.88844e+07	5.94462e+07	7.70485e+07	7.4842e+07	4.56332e+07	5.71667e+07	4.68894e+07	3.82111e+07	1.36159e+08	1.31456e+08	1.63931e+08	1.25775e+08	1.64902e+08	7.29483e+07	1.54439e+08	1.10868e+08	8.26682e+07	6.8293e+07	1.04882	0.000255181	1.4209
P51148	RAB5C	Ras-related protein Rab-5C OS=Homo sapiens OX=9606 GN=RAB5C PE=1 SV=2	146	5	216	8.94063e+07	1.14601e+08	6.82125e+07	1.08408e+08	1.00925e+08	1.09916e+08	1.03984e+08	1.00499e+08	7.71945e+07	1.01814e+08	7.71765e+07	7.72401e+07	8.61668e+07	6.53775e+07	1.53327e+08	1.27742e+08	1.35625e+08	7.38522e+07	1.30567e+08	1.03735e+08	0.0793437	0.710144	0.12132
P27816	MAP4	Microtubule-associated protein 4 OS=Homo sapiens OX=9606 GN=MAP4 PE=1 SV=3	146	16	1152	5.20627e+07	4.12184e+07	2.5045e+08	6.42443e+07	2.20983e+08	6.12044e+07	4.60704e+07	3.92346e+07	4.64412e+07	5.75742e+07	109548899	8.87546e+07	8.66538e+07	1.08818e+08	7.45468e+07	6.61169e+07	7.20545e+07	8.47481e+07	6.49784e+07	5.10261e+07	-0.0658461	0.902511	-0.0434715
Q96IU4	ABHD14B	Protein ABHD14B OS=Homo sapiens OX=9606 GN=ABHD14B PE=1 SV=1	146	8	210	1.62821e+08	2.07633e+08	1.09965e+08	1.48472e+08	152893240	2.10729e+08	148922262	159057479	1.4338e+08	1.67725e+08	9.66763e+07	9.78309e+07	7.93659e+07	7.35516e+07	7.4003e+07	5.34377e+07	3.75209e+07	5.87871e+07	9.10162e+07	1.42982e+08	-1.13117	2.46187e-05	-1.83823
P22352	GPX3	Glutathione peroxidase 3 OS=Homo sapiens OX=9606 GN=GPX3 PE=1 SV=2	146	8	226	6.4088e+08	6.31831e+08	2.71835e+08	5.05802e+08	1.79269e+08	5.03225e+08	5.08957e+08	507116775	512613629	4.59218e+08	8.2716e+07	7.14511e+07	5.03341e+07	1.29138e+08	6.94798e+07	3.57897e+07	4.09748e+07	9.86341e+07	5.91967e+08	4.88279e+08	-1.85991	0.00105441	-1.13202
P23396	RPS3	40S ribosomal protein S3 OS=Homo sapiens OX=9606 GN=RPS3 PE=1 SV=2	145	15	243	6.95717e+07	5.1439e+07	9.77977e+07	7.95647e+07	6.36775e+07	9.0878e+07	7.35418e+07	9.70442e+07	7.11861e+07	6.72122e+07	1.13941e+08	2.28012e+08	1.67091e+08	1.74879e+08	2.33386e+08	2.84151e+08	2.94577e+08	2.10601e+08	1.226e+08	9.9019e+07	1.41555	0.00125671	1.69554
Q8WX93	PALLD	Palladin OS=Homo sapiens OX=9606 GN=PALLD PE=1 SV=3	145	23	1383	3.19668e+07	3.23908e+07	5.1941e+07	5.48544e+07	5.04428e+07	1.64035e+07	4.5827e+07	5.66135e+07	5.54837e+07	8.09284e+07	2.25516e+08	1.83408e+08	5.63053e+07	1.82362e+08	8.88649e+07	4.51658e+07	5.24179e+07	1.76711e+08	3.75798e+07	5.66442e+07	1.28849	0.0470248	0.793328
Q15233	NONO	Non-POU domain-containing octamer-binding protein OS=Homo sapiens OX=9606 GN=NONO PE=1 SV=4	145	13	471	4.42518e+07	3.45752e+07	8.4408e+07	4.83524e+07	3.59211e+07	2.88769e+07	2.92724e+07	4.62357e+07	4.94198e+07	3.8132e+07	1.14611e+08	1.08448e+08	1.37026e+08	1.15102e+08	3.95482e+07	4.1931e+07	4.70675e+07	1.25265e+08	6.6155e+07	6.10764e+07	1.00756	0.0213891	0.851298
P05556	ITGB1	Integrin beta-1 OS=Homo sapiens OX=9606 GN=ITGB1 PE=1 SV=2	145	13	798	6.77116e+07	6.33217e+07	1.09022e+08	7.57807e+07	5.48824e+07	5.96165e+07	78083140	8.1016e+07	8.1921e+07	9.59903e+07	1.94717e+08	1.66179e+08	9.65924e+07	1.16135e+08	5.51131e+07	5.55734e+07	4.747e+07	1.24371e+08	8.93325e+07	6.98261e+07	0.453178	0.204363	0.443041
P50053	KHK	Ketohexokinase OS=Homo sapiens OX=9606 GN=KHK PE=1 SV=2	145	14	298	2.68995e+08	3.25486e+08	8.06757e+07	1.62261e+08	1.39566e+08	3.31732e+08	3.15749e+08	1.51331e+08	6.06925e+07	2.1278e+08	0	2.1581e+06	0	0	4.65678e+06	1.60573e+06	1.45499e+06	0	6.4326e+07	2.04467e+08	-4.63551	0.000757338	-1.69646
P19971	TYMP	Thymidine phosphorylase OS=Homo sapiens OX=9606 GN=TYMP PE=1 SV=2	144	17	482	5.18386e+06	2.34769e+06	3.7277e+07	1.93698e+07	1.41504e+07	1.10175e+07	1.28149e+07	4.26942e+06	3.34934e+06	630710	1.06598e+07	1.58387e+08	256647870	8.63641e+07	3.43711e+08	5.68188e+08	4.56018e+08	1.1127e+08	1.50744e+08	6.30805e+07	4.43	0.0149044	1.2298
Q6XQN6	NAPRT	Nicotinate phosphoribosyltransferase OS=Homo sapiens OX=9606 GN=NAPRT PE=1 SV=2	144	16	538	9.47349e+07	1.13143e+08	7.98051e+07	9.64831e+07	1.37434e+08	1.75048e+08	108633557	1.25284e+08	1.27984e+08	1.16577e+08	2.97753e+07	9.1616e+06	5.20842e+07	4.03109e+07	2.73193e+07	4.95811e+07	4.65216e+07	1.92469e+07	4.93065e+07	7.55887e+07	-1.70983	1.16205e-05	-2.05981
Q14117	DPYS	Dihydropyrimidinase OS=Homo sapiens OX=9606 GN=DPYS PE=1 SV=1	144	16	519	2.48677e+08	3.23584e+08	5.54256e+07	1.76777e+08	9.72438e+07	2.20381e+08	2.03719e+08	9.13036e+07	1.4316e+08	2.10675e+08	1.40647e+07	1.04665e+07	0	7.71827e+06	2.19215e+07	1.19353e+07	1.12098e+07	1.30738e+07	7.17043e+07	1.62305e+08	-3.29761	0.000695882	-1.63676
Q7KZF4	SND1	Staphylococcal nuclease domain-containing protein 1 OS=Homo sapiens OX=9606 GN=SND1 PE=1 SV=1	143	23	910	7.88238e+07	7.73395e+07	8.16109e+07	9.7732e+07	7.99864e+07	9.35256e+07	8.81387e+07	7.65268e+07	7.20114e+07	5.90539e+07	1.03683e+08	1.97636e+08	1.4502e+08	129391712	2.30912e+08	2.17826e+08	3.72824e+08	1.42214e+08	1.15509e+08	9.39393e+07	1.19224	0.0147433	1.15277
P00387	CYB5R3	NADH-cytochrome b5 reductase 3 OS=Homo sapiens OX=9606 GN=CYB5R3 PE=1 SV=3	143	12	301	1.24174e+08	7.47209e+07	1.25295e+08	1.28197e+08	6.39955e+07	8.80759e+07	1.01438e+08	1.01261e+08	1.2941e+08	1.82991e+08	1.39601e+08	2.37232e+08	9.06224e+07	2.93653e+08	4.55841e+07	6.36264e+07	8.79812e+07	2.10637e+08	1.48876e+08	1.1626e+08	0.38722	0.354108	0.306869
P21266	GSTM3	Glutathione S-transferase Mu 3 OS=Homo sapiens OX=9606 GN=GSTM3 PE=1 SV=3	143	14	225	8.48452e+07	7.97886e+07	8.93501e+07	9.12967e+07	2.56611e+08	108544812	1.10632e+08	9.00092e+07	5.61303e+07	7.37325e+07	1.21883e+08	6.70571e+07	4.87236e+07	9.47581e+07	3.17863e+07	2.45516e+06	1.37787e+07	2.08878e+07	3.25102e+07	1.02481e+08	-1.11065	0.0454178	-0.619256
P00441	SOD1	Superoxide dismutase [Cu-Zn] OS=Homo sapiens OX=9606 GN=SOD1 PE=1 SV=2	143	7	154	3.94364e+08	6.12262e+08	1.97545e+08	3.08116e+08	2.86034e+08	3.95728e+08	3.40065e+08	1.92681e+08	3.08962e+08	409293157	1.92557e+08	1.75142e+08	2.15307e+08	1.07377e+08	9.17751e+07	5.82372e+07	6.61783e+07	1.14189e+08	2.65378e+08	3.79579e+08	-1.26947	0.0017621	-1.10371
P53621	COPA	Coatomer subunit alpha OS=Homo sapiens OX=9606 GN=COPA PE=1 SV=2	142	25	1224	4.27858e+07	3.49351e+07	5.79264e+07	6.42315e+07	3.12661e+07	4.02681e+07	3.91262e+07	4.8662e+07	3.0573e+07	4.7517e+07	4.27435e+07	1.05094e+08	6.14818e+07	7.60708e+07	1.13426e+08	1.28113e+08	1.76325e+08	6.97348e+07	6.43949e+07	5.3119e+07	1.0893	0.0172671	0.99031
P62879	GNB2	Guanine nucleotide-binding protein G(I)/G(S)/G(T) subunit beta-2 OS=Homo sapiens OX=9606 GN=GNB2 PE=1 SV=3	142	6	340	3.99779e+07	4.49936e+07	1.04447e+08	6.32731e+07	1.13923e+08	7.17218e+07	6.04185e+07	6.73648e+07	6.31848e+07	4.554e+07	1.06444e+08	1.02362e+08	103654157	9.32937e+07	2.53562e+08	2.26305e+08	1.84958e+08	6.17452e+07	6.86997e+07	5.4913e+07	0.983641	0.0454653	0.739499
Q12906	ILF3	Interleukin enhancer-binding factor 3 OS=Homo sapiens OX=9606 GN=ILF3 PE=1 SV=3	142	19	894	5.40045e+07	4.04561e+07	9.81429e+07	5.76162e+07	3.64515e+07	3.3693e+07	4.87246e+07	4.66143e+07	4.52085e+07	3.65368e+07	1.027e+08	1.17036e+08	1.03473e+08	1.22138e+08	6.20456e+07	5.37142e+07	6.76368e+07	1.12396e+08	8.1421e+07	5.54304e+07	0.877578	0.00283862	0.993426
P31146	CORO1A	Coronin-1A OS=Homo sapiens OX=9606 GN=CORO1A PE=1 SV=4	141	17	461	2.10755e+06	3.792e+06	8.18985e+07	1.56355e+07	3.24964e+07	2.95669e+06	1.18312e+07	4.04328e+06	6.6082e+06	5.42798e+06	1.73277e+08	3.39601e+08	6.62962e+08	4.21622e+08	5.72208e+08	1051030378	5.9768e+08	3.21546e+08	1.47562e+08	5.85492e+07	4.83597	0.00390683	1.59093
Q92945	KHSRP	Far upstream element-binding protein 2 OS=Homo sapiens OX=9606 GN=KHSRP PE=1 SV=4	140	13	711	4.95633e+07	4.51183e+07	1.00667e+08	5.44673e+07	3.85634e+07	4.95795e+07	4.68935e+07	4.82127e+07	4.53075e+07	4.09398e+07	8.58149e+07	1.12592e+08	1.19957e+08	1.19333e+08	9.89314e+07	7.89821e+07	1.14162e+08	8.84552e+07	6.52425e+07	5.34074e+07	0.918582	0.000357366	1.30909
Q8WUM4	PDCD6IP	Programmed cell death 6-interacting protein OS=Homo sapiens OX=9606 GN=PDCD6IP PE=1 SV=1	140	19	868	6.41058e+07	5.57728e+07	6.39958e+07	6.3692e+07	5.44464e+07	6.25691e+07	6.17289e+07	6.04703e+07	5.4585e+07	6.36052e+07	4.69696e+07	7.52884e+07	8.65024e+07	5.61705e+07	4.92636e+07	6.69891e+07	4.2633e+07	54465364	6.08059e+07	6.20551e+07	-0.0143431	0.923215	-0.0347716
P51659	HSD17B4	Peroxisomal multifunctional enzyme type 2 OS=Homo sapiens OX=9606 GN=HSD17B4 PE=1 SV=3	139	14	736	6.29277e+07	5.64031e+07	3.59661e+07	8.20426e+07	5.68228e+07	8.72027e+07	5.76121e+07	4.81497e+07	2.96975e+07	6.48918e+07	0	1.65757e+07	4.09521e+07	1.88967e+07	1.04562e+08	8.38891e+07	1.2106e+08	2.55312e+07	102867562	4.23496e+07	-0.0256062	0.95896	-0.0170071
O75936	BBOX1	Gamma-butyrobetaine dioxygenase OS=Homo sapiens OX=9606 GN=BBOX1 PE=1 SV=1	139	14	387	1.78678e+08	2.79275e+08	4.75231e+07	2.18881e+08	1.42408e+08	3.31353e+08	1.93741e+08	1.67119e+08	1.4986e+08	2.00858e+08	0	1.12697e+07	9.58407e+06	0	2.08994e+07	0	0	0	1.17787e+08	1.89917e+08	-3.42935	0.000124238	-1.58413
P13647	KRT5	Keratin, type II cytoskeletal 5 OS=Homo sapiens OX=9606 GN=KRT5 PE=1 SV=3	138	12	590	1.80149e+06	1.25753e+07	2.06717e+06	5.47909e+06	5.96406e+06	9.38637e+07	1.98924e+07	9.36243e+06	8.22548e+06	9.81474e+06	116059492	9.74949e+06	3.41621e+06	1.55402e+08	1.22234e+07	3.34903e+07	2.14004e+06	1.04336e+07	3.18712e+07	4.46185e+06	1.30065	0.297956	0.315811
P47756	CAPZB	F-actin-capping protein subunit beta OS=Homo sapiens OX=9606 GN=CAPZB PE=1 SV=4	138	8	277	6.23415e+07	6.53262e+07	7.18295e+07	6.59016e+07	5.60832e+07	6.617e+07	5.98615e+07	5.37146e+07	5.51951e+07	4.87923e+07	113326670	1.37121e+08	194873700	1.35879e+08	125629478	1.72812e+08	1.85108e+08	1.39382e+08	1.26472e+08	8.00655e+07	1.28856	0.00011678	2.57101
P08559	PDHA1	Pyruvate dehydrogenase E1 component subunit alpha, somatic form, mitochondrial OS=Homo sapiens OX=9606 GN=PDHA1 PE=1 SV=3	138	18	390	1.73656e+08	1.46171e+08	1.20657e+08	1.83333e+08	2.52701e+08	2.1988e+08	2.03714e+08	2.57608e+08	1.8456e+08	1.63836e+08	8.50032e+07	6.4015e+07	6.92714e+07	4.68427e+07	4.31348e+07	6.55837e+07	5.19122e+07	5.66384e+07	1.00318e+08	2.08772e+08	-1.55776	3.77474e-05	-2.13313
Q7Z4W1	DCXR	L-xylulose reductase OS=Homo sapiens OX=9606 GN=DCXR PE=1 SV=2	138	11	244	4.37733e+08	3.87837e+08	6.60903e+07	2.50621e+08	2.78555e+08	6.70914e+08	1.95341e+08	4.32035e+08	4.00565e+08	6.68551e+08	5.60455e+06	1.762e+07	6.19417e+06	0	2.80516e+07	3.02306e+07	1.04117e+07	0	5.28121e+07	3.48794e+08	-4.49762	0.000998063	-1.81693
P30039	PBLD	Phenazine biosynthesis-like domain-containing protein OS=Homo sapiens OX=9606 GN=PBLD PE=1 SV=2	138	15	288	2.74706e+08	3.66792e+08	8.40888e+07	1.16746e+08	1.73683e+08	486990212	2.12326e+08	174394079	2.04715e+08	2.73802e+08	5.10256e+06	1.99406e+06	0	0	0	0	0	0	7.39119e+07	2.05234e+08	-4.7176	0.000857753	-1.66511
Q04695	KRT17	Keratin, type I cytoskeletal 17 OS=Homo sapiens OX=9606 GN=KRT17 PE=1 SV=2	137	8	432	0	4.19884e+06	3.44682e+06	3.32447e+06	0	8.71053e+06	3.28532e+06	0	0	3.38699e+06	5.10329e+07	3.42068e+06	0	5.76654e+07	7.05736e+06	0	0	0	1.97978e+06	4.32599e+06	2.35283	0.272079	0.439172
Q01518	CAP1	Adenylyl cyclase-associated protein 1 OS=Homo sapiens OX=9606 GN=CAP1 PE=1 SV=5	137	11	475	7.12589e+07	7.26596e+07	9.15572e+07	8.58618e+07	6.97957e+07	7.45834e+07	7.53054e+07	6.25327e+07	5.86433e+07	5.49345e+07	1.10846e+08	194145132	362445140	1.82308e+08	2.34895e+08	2.96416e+08	3.32372e+08	1.95184e+08	1.9517e+08	9.17094e+07	1.70468	0.00129422	1.85954
Q9H0W9	C11orf54	Ester hydrolase C11orf54 OS=Homo sapiens OX=9606 GN=C11orf54 PE=1 SV=1	137	14	315	489365111	5.3417e+08	155317023	3.07289e+08	2.61511e+08	4.41973e+08	3.44899e+08	2.18756e+08	3.27453e+08	3.08944e+08	2.03714e+07	1.90082e+07	1.60979e+07	8.04507e+06	2.29198e+07	0	1.20642e+07	1.60325e+07	2.48018e+08	2.88787e+08	-3.07286	8.4193e-05	-1.59988
P01011	SERPINA3	Alpha-1-antichymotrypsin OS=Homo sapiens OX=9606 GN=SERPINA3 PE=1 SV=2	136	13	423	1.08264e+08	4.38046e+07	5.87452e+07	3.01917e+07	2.94671e+08	9.14031e+07	7.12292e+07	6.59036e+07	4.49424e+08	1.00541e+08	2.07645e+08	4.83455e+07	114101741	3.25763e+08	1.02046e+08	9.94046e+08	1.76664e+08	196897639	2.04713e+08	6.27807e+07	1.00287	0.275548	0.333028
P30048	PRDX3	Thioredoxin-dependent peroxide reductase, mitochondrial OS=Homo sapiens OX=9606 GN=PRDX3 PE=1 SV=3	136	8	256	4.99746e+08	5.89984e+08	2.2999e+08	4.2678e+08	6.81341e+08	5.28372e+08	3.99431e+08	4.81762e+08	3.52875e+08	4.61862e+08	1.1081e+08	1.04922e+08	1.60236e+08	7.46814e+07	1.14492e+08	1.24861e+08	1.77799e+08	7.49905e+07	1.94987e+08	4.86173e+08	-1.87967	1.7947e-05	-2.12664
P02763	ORM1	Alpha-1-acid glycoprotein 1 OS=Homo sapiens OX=9606 GN=ORM1 PE=1 SV=1	135	4	201	1.26662e+08	1.35599e+08	1.02531e+08	2.84513e+07	2.228e+08	5.92988e+07	7.08733e+07	6.14449e+07	4.92763e+08	1.1096e+08	1.81351e+08	1.73162e+08	2.35807e+08	162787942	3.16677e+08	1068313884	4.04482e+08	251565093	1.17608e+08	6.69705e+07	1.19678	0.142938	0.451626
O14773	TPP1	Tripeptidyl-peptidase 1 OS=Homo sapiens OX=9606 GN=TPP1 PE=1 SV=2	135	5	563	1.70357e+08	1.23855e+08	1.22876e+08	6.80901e+07	7.07291e+07	1.19096e+08	1.47821e+08	1.19272e+08	7.65762e+07	8.95214e+07	9.14572e+07	1.57533e+08	2.33785e+08	9.89696e+07	270590921	3.16495e+08	2.5989e+08	1.23526e+08	1.21664e+08	1.35173e+08	0.747017	0.057772	0.670693
P40227	CCT6A	T-complex protein 1 subunit zeta OS=Homo sapiens OX=9606 GN=CCT6A PE=1 SV=3	135	9	531	9.26446e+07	9.62022e+07	8.66626e+07	9.01678e+07	5.97281e+07	9.14481e+07	7.59099e+07	7.86807e+07	6.55245e+07	8.2192e+07	1.09493e+08	7.98311e+07	9.12912e+07	9.7872e+07	4.72328e+07	1.76758e+08	1.14042e+08	7.20926e+07	1.31244e+08	8.50571e+07	0.319264	0.212366	0.434902
P41219	PRPH	Peripherin OS=Homo sapiens OX=9606 GN=PRPH PE=1 SV=2	135	10	470	2.22719e+06	1.76444e+07	4.22568e+06	3.94462e+06	1.13123e+07	2.1213e+06	1.6057e+06	2.74442e+06	1.19393e+06	5.7803e+06	3.51269e+07	2.65698e+06	0	6.80368e+06	0	2.50895e+06	0	6.08942e+06	2.08666e+06	4.78648e+06	0.218033	0.858267	0.0555728
P30043	BLVRB	Flavin reductase (NADPH) OS=Homo sapiens OX=9606 GN=BLVRB PE=1 SV=3	135	7	206	1.10285e+08	1.51246e+08	7.53927e+07	6.08009e+07	6.16203e+07	8.04118e+07	9.51875e+07	9.355e+07	9.63228e+07	9.2302e+07	8.66673e+07	1.01304e+08	1.2386e+08	7.58573e+07	5.52749e+07	1.87367e+08	7.88279e+07	6.10424e+07	1.04064e+08	9.50441e+07	0.0829643	0.775184	0.0866039
P50895	BCAM	Basal cell adhesion molecule OS=Homo sapiens OX=9606 GN=BCAM PE=1 SV=2	135	14	628	5.45728e+07	4.90976e+07	1.17437e+08	9.21412e+07	5.67661e+07	7.27365e+07	6.52747e+07	8.7008e+07	9.72892e+07	7.15259e+07	1.15037e+08	8.4302e+07	6.22891e+07	2.5879e+07	1.05093e+07	6.21989e+06	1.62714e+06	7.57349e+07	8.13633e+07	72546249	-0.57039	0.188106	-0.41951
Q00796	SORD	Sorbitol dehydrogenase OS=Homo sapiens OX=9606 GN=SORD PE=1 SV=4	135	13	357	3.23281e+08	4.9607e+08	1.62154e+08	2.77057e+08	2.74288e+08	6.94214e+08	3.07355e+08	2.66813e+08	2.02042e+08	4.21445e+08	1.44527e+08	1.02523e+08	5.18663e+07	8.75696e+07	2.27866e+08	8.64457e+07	7.56527e+07	1.25342e+08	1.01759e+08	2.46505e+08	-1.61887	0.00355267	-1.17027
P01042	KNG1	Kininogen-1 OS=Homo sapiens OX=9606 GN=KNG1 PE=1 SV=2	134	12	644	6.75751e+07	5.00459e+07	7.43774e+07	2.14562e+07	1.71652e+08	6.31104e+07	6.21527e+07	5.61372e+07	1.28078e+08	6.43639e+07	1.45112e+08	1.14765e+08	1.00968e+08	1.64613e+08	128164984	1.86185e+08	5.69387e+07	1.05089e+08	5.31697e+07	5.58565e+07	0.627177	0.0926402	0.499012
O00159	MYO1C	Unconventional myosin-Ic OS=Homo sapiens OX=9606 GN=MYO1C PE=1 SV=4	134	17	1063	4.873e+07	4.05198e+07	1.02501e+08	8.28999e+07	8.62035e+07	3.17827e+07	6.01159e+07	8.77817e+07	7.115e+07	7.52263e+07	1.76704e+08	1.33117e+08	6.92724e+07	1.05971e+08	1.49047e+07	6.38375e+06	3.48057e+07	7.54973e+07	4.45039e+07	5.9261e+07	0.0968779	0.850567	0.063655
P34897	SHMT2	Serine hydroxymethyltransferase, mitochondrial OS=Homo sapiens OX=9606 GN=SHMT2 PE=1 SV=3	134	17	504	1.44063e+08	9.5778e+07	2.02755e+07	6.879e+07	4.91222e+07	1.74528e+08	1.02441e+08	7.86535e+07	6.94143e+07	8.5565e+07	2.10721e+06	2.52655e+07	2.08385e+07	1.14849e+07	9.05248e+06	2.69226e+07	2.78522e+07	2.32939e+07	3.33888e+07	8.60215e+07	-2.14993	0.0027599	-1.32764
P19012	KRT15	Keratin, type I cytoskeletal 15 OS=Homo sapiens OX=9606 GN=KRT15 PE=1 SV=3	133	1	456	1.35612e+07	7.18727e+06	1.61517e+07	1.53518e+07	1.23697e+07	6.30548e+06	1.49344e+07	1.82805e+07	1.36155e+07	8.00714e+06	1.19629e+07	1.18654e+07	7.82723e+06	1.89315e+07	1.1779e+07	0	0	1.34667e+07	1.95822e+07	1.16944e+07	-0.246438	0.535276	-0.188049
P53597	SUCLG1	Succinate--CoA ligase [ADP/GDP-forming] subunit alpha, mitochondrial OS=Homo sapiens OX=9606 GN=SUCLG1 PE=1 SV=4	133	9	346	2.62365e+08	2.72294e+08	7.1019e+07	2.22127e+08	2.08417e+08	2.27833e+08	2.73612e+08	2.25416e+08	1.98655e+08	279598370	2.57492e+07	2.98175e+07	1.75754e+07	6.54878e+06	1.11799e+07	1.26808e+07	1.32331e+07	2.16378e+07	9.35922e+07	2.22066e+08	-3.12007	4.31497e-06	-2.39006
P13010	XRCC5	X-ray repair cross-complementing protein 5 OS=Homo sapiens OX=9606 GN=XRCC5 PE=1 SV=3	132	12	732	3.33883e+07	2.21069e+07	7.31422e+07	33833492	3.06711e+07	2.88969e+07	4.56788e+07	3.75096e+07	4.33726e+07	2.41688e+07	8.79691e+07	9.50517e+07	1.41761e+08	9.39901e+07	5.3197e+07	3.68603e+07	4.81086e+07	9.29355e+07	6.00649e+07	4.34908e+07	1.08142	0.0122023	0.933709
P36776	LONP1	Lon protease homolog, mitochondrial OS=Homo sapiens OX=9606 GN=LONP1 PE=1 SV=2	132	20	959	8.5353e+07	9.24331e+07	4.53124e+07	9.90208e+07	9.2137e+07	1.09368e+08	1.00017e+08	8.67115e+07	7.83959e+07	9.30037e+07	3.11794e+06	1.96314e+07	1.27366e+07	1.60204e+07	1.15055e+07	2.88783e+07	2.50451e+07	1.29617e+07	3.4448e+07	8.70787e+07	-2.27164	1.10054e-06	-2.72572
P34913	EPHX2	Bifunctional epoxide hydrolase 2 OS=Homo sapiens OX=9606 GN=EPHX2 PE=1 SV=2	132	17	555	120235815	1.40891e+08	7.59879e+07	1.37655e+08	126967097	1.29695e+08	1.60078e+08	1.50736e+08	1.46681e+08	1.99719e+08	2.37543e+07	7.11965e+06	1.44454e+07	6.28282e+06	1.70779e+07	7.19373e+06	0	1.31908e+07	6.74211e+07	100931456	-2.99757	1.73353e-06	-2.49529
Q04917	YWHAH	14-3-3 protein eta OS=Homo sapiens OX=9606 GN=YWHAH PE=1 SV=4	131	6	246	2.0981e+07	2.25115e+07	8.99296e+07	4.73113e+07	7.0043e+07	3.3158e+07	2.53459e+07	2.16068e+07	2.0831e+07	2.19301e+07	7.56941e+07	5.68264e+07	1.02081e+08	6.98829e+07	2.37685e+08	1.20771e+08	1.26759e+08	7.01161e+07	6.55245e+07	2.79697e+07	1.46031	0.0100866	0.857584
P14866	HNRNPL	Heterogeneous nuclear ribonucleoprotein L OS=Homo sapiens OX=9606 GN=HNRNPL PE=1 SV=2	131	13	589	5.91437e+07	4.43343e+07	8.6993e+07	6.01118e+07	5.5836e+07	2.97745e+07	6.05288e+07	6.37668e+07	4.60484e+07	4.13242e+07	1.1907e+08	141005586	1.50447e+08	1.43853e+08	1.22444e+08	8.22084e+07	9.59787e+07	1.35341e+08	8.70097e+07	7.39234e+07	1.12762	5.24761e-05	1.66428
P08294	SOD3	Extracellular superoxide dismutase [Cu-Zn] OS=Homo sapiens OX=9606 GN=SOD3 PE=1 SV=2	131	8	240	5.73135e+07	4.33656e+07	139687217	2.13419e+07	3.9092e+07	7.84232e+07	5.22835e+07	1.14995e+08	5.20354e+07	5.37685e+07	2.37186e+08	290887424	1.62047e+08	1.47031e+08	1.21016e+08	4.30773e+07	6.18804e+07	1.72217e+08	4.06715e+07	5.18988e+07	1.12003	0.0585326	0.661774
P35222	CTNNB1	Catenin beta-1 OS=Homo sapiens OX=9606 GN=CTNNB1 PE=1 SV=1	131	13	781	5.61394e+07	6.14392e+07	5.30814e+07	6.86796e+07	38579620	6.6517e+07	6.82243e+07	7.82277e+07	7.70161e+07	6.64029e+07	4.14027e+07	4.39999e+07	3.6926e+07	3.54182e+07	4.5018e+06	0	6.16927e+06	2.82399e+07	6.54302e+07	5.81286e+07	-1.12313	0.00177494	-1.08323
Q86VP6	CAND1	Cullin-associated NEDD8-dissociated protein 1 OS=Homo sapiens OX=9606 GN=CAND1 PE=1 SV=2	130	14	1230	151949069	2.65265e+08	1.38506e+08	119590555	1.39434e+08	3.00426e+08	2.04156e+08	2.1092e+08	1.94884e+08	190652270	366023881	1.96612e+08	3.4402e+08	3.25537e+08	289093107	4.21002e+08	4.62783e+08	286440880	3.62858e+08	2.45626e+08	0.824943	0.000964149	1.14821
Q5SSJ5	HP1BP3	Heterochromatin protein 1-binding protein 3 OS=Homo sapiens OX=9606 GN=HP1BP3 PE=1 SV=1	130	13	553	6.17095e+07	8.61114e+07	1.39025e+08	8.29573e+07	8.12541e+07	8.39046e+07	6.79057e+07	8.39726e+07	8.06028e+07	6.66178e+07	1.74726e+08	153577135	179578858	1.75036e+08	1.29906e+08	5.78493e+07	9.56631e+07	1.06359e+08	5.28779e+07	8.25079e+07	0.584439	0.0717516	0.621121
Q14847	LASP1	LIM and SH3 domain protein 1 OS=Homo sapiens OX=9606 GN=LASP1 PE=1 SV=2	130	11	261	1.15822e+08	1.19838e+08	1.2603e+08	1.09488e+08	1.06793e+08	9.79235e+07	1.02979e+08	9.45671e+07	1.11157e+08	1.43106e+08	1.84489e+08	2.03941e+08	1.89016e+08	1.63757e+08	1.20673e+08	1.54625e+08	1.85694e+08	1.54086e+08	1.48671e+08	1.26011e+08	0.568335	0.000201899	1.43603
P17844	DDX5	Probable ATP-dependent RNA helicase DDX5 OS=Homo sapiens OX=9606 GN=DDX5 PE=1 SV=1	130	7	614	2.97012e+08	3.5028e+08	9.87066e+07	246409036	1.71202e+08	3.85892e+08	2.96522e+08	1.19576e+08	2.21057e+08	300528451	1.58396e+07	3.12649e+07	32505559	1.82656e+07	3.85318e+07	4.26714e+07	3.03091e+07	1.67657e+07	5.79305e+07	217926099	-2.97812	0.000341284	-2.09334
P04179	SOD2	Superoxide dismutase [Mn], mitochondrial OS=Homo sapiens OX=9606 GN=SOD2 PE=1 SV=3	129	11	222	1.51404e+08	1.97886e+08	1.49213e+08	2.20722e+08	1.6142e+08	146951233	1.62054e+08	1.14815e+08	1.08103e+08	142026280	1.69101e+08	2.0734e+08	4.80719e+08	1.32252e+08	2.39582e+08	5.70543e+08	5.71436e+08	2.82114e+08	1068921339	2.20585e+08	1.41155	0.0588831	0.823191
P02743	APCS	Serum amyloid P-component OS=Homo sapiens OX=9606 GN=APCS PE=1 SV=2	128	8	223	7.10199e+07	4.54114e+07	2.29684e+07	4.03499e+07	5.44597e+07	3.33797e+07	7.42411e+07	9.54691e+07	9.59419e+07	5.81747e+07	7.98734e+08	1.94751e+08	1.28893e+08	4.39368e+08	1.27808e+08	1.13645e+08	3.6267e+07	3.93304e+08	4.6258e+07	5.77736e+07	2.09818	0.0817101	0.751264
P52209	PGD	6-phosphogluconate dehydrogenase, decarboxylating OS=Homo sapiens OX=9606 GN=PGD PE=1 SV=3	128	12	483	5.3196e+07	5.56392e+07	6.5302e+07	5.94938e+07	5.39969e+07	6.13866e+07	5.84997e+07	5.36562e+07	4.96948e+07	4.78437e+07	7.91579e+07	7.75276e+07	1.46896e+08	1.06261e+08	1.41763e+08	459310229	2.64963e+08	9.80712e+07	1.46145e+08	6.65152e+07	1.596	0.0474281	0.935227
P00751	CFB	Complement factor B OS=Homo sapiens OX=9606 GN=CFB PE=1 SV=2	127	18	764	6.51659e+07	1.65927e+07	6.39946e+07	1.79019e+07	2.08644e+08	3.7994e+07	6.90835e+07	2.78052e+07	2.74546e+08	4.41355e+07	1.31093e+08	1.32104e+08	5.31257e+07	3.1898e+08	9.93882e+07	1.65295e+08	1.15332e+08	2.4944e+08	6.23131e+07	3.87103e+07	0.836273	0.178989	0.394198
P11766	ADH5	Alcohol dehydrogenase class-3 OS=Homo sapiens OX=9606 GN=ADH5 PE=1 SV=4	127	12	374	9.39949e+07	1.25001e+08	5.45846e+07	8.335e+07	7.36637e+07	8.55832e+07	9.06839e+07	6.47867e+07	7.81893e+07	9.15032e+07	6.85388e+07	4.60386e+07	3.79259e+07	7.96092e+07	8.59159e+06	7.9226e+06	1.14187e+07	5.26677e+07	4.59658e+07	8.15174e+07	-1.07799	0.00204883	-1.0378
P45954	ACADSB	Short/branched chain specific acyl-CoA dehydrogenase, mitochondrial OS=Homo sapiens OX=9606 GN=ACADSB PE=1 SV=1	127	14	432	1.53019e+08	199390480	3.1135e+07	1.16616e+08	1.19101e+08	2.52988e+08	1.81539e+08	1.42873e+08	1.23739e+08	1.55526e+08	0	4.13349e+06	1.10123e+07	1.12749e+07	1.14492e+08	6.89333e+07	2.90752e+07	1.60938e+07	5.8793e+07	1.79785e+08	-2.08166	0.000747578	-1.22838
P00167	CYB5A	Cytochrome b5 OS=Homo sapiens OX=9606 GN=CYB5A PE=1 SV=2	127	8	134	403709777	4.08173e+08	1.38294e+08	1.65971e+08	2.01097e+08	3.68214e+08	298434994	2.36693e+08	2.27415e+08	364234163	2.84226e+07	4.04547e+07	3.58976e+07	1.53098e+07	0	8.37299e+06	3.2286e+06	1.4829e+07	9.39597e+07	2.54564e+08	-3.39576	0.000122968	-2.07659
Q9BSE5	AGMAT	Agmatinase, mitochondrial OS=Homo sapiens OX=9606 GN=AGMAT PE=1 SV=2	127	13	352	1183007701	1010938144	1.65891e+08	6.76847e+08	9.22923e+08	2221624622	649256209	5.88758e+08	4.983e+08	833615759	4.76991e+06	1.44324e+07	1.04174e+07	7.29194e+06	1.83464e+07	8.22552e+06	9.17609e+06	5.14554e+06	116580004	5.88461e+08	-5.34048	0.0030288	-1.52957
P59665	DEFA1	Neutrophil defensin 1 OS=Homo sapiens OX=9606 GN=DEFA1 PE=1 SV=1	126	5	94	2.08229e+08	2.37275e+08	538749724	507032929	1008294456	1.91526e+08	3.03267e+08	1.18015e+08	2.93793e+08	1.59741e+08	4.56065e+08	3842998992	12586074796	4724627647	5987958196	65534408090	25132767900	1652154303	5643944992	1.775e+08	5.28997	0.132725	0.68635
P02794	FTH1	Ferritin heavy chain OS=Homo sapiens OX=9606 GN=FTH1 PE=1 SV=2	126	9	183	7.06014e+07	1.50552e+08	6.98847e+07	9.89804e+07	1.10688e+08	2.19248e+08	1.37357e+08	6.19579e+07	3.19932e+07	7.22186e+07	1.40216e+08	6.83046e+07	1.09354e+08	8.69576e+07	4.00702e+08	1006976990	1464935212	2.02529e+08	2.95091e+08	7.93821e+07	2.03502	0.136012	0.618885
P05388	RPLP0	60S acidic ribosomal protein P0 OS=Homo sapiens OX=9606 GN=RPLP0 PE=1 SV=1	126	8	317	4.99582e+07	4.67408e+07	8.8892e+07	6.90283e+07	5.71167e+07	3.96942e+07	5.08635e+07	5.89395e+07	4.81263e+07	5.03052e+07	9.6154e+07	1.21246e+08	1.72517e+08	9.6064e+07	113283457	1.03293e+08	1.70051e+08	1.13952e+08	9.09805e+07	5.94432e+07	1.09711	0.000165031	1.50444
P06748	NPM1	Nucleophosmin OS=Homo sapiens OX=9606 GN=NPM1 PE=1 SV=2	126	7	294	1.20108e+08	1.24748e+08	1.56556e+08	1.26847e+08	6.53247e+07	7.05196e+07	8.76514e+07	7.72058e+07	1.01879e+08	1.0104e+08	2.33009e+08	2.0776e+08	3.72087e+08	1.66845e+08	1.0034e+08	6.26395e+07	1.91545e+08	195076750	1.54998e+08	1.2395e+08	0.858876	0.0233745	0.762798
Q13838	DDX39B	Spliceosome RNA helicase DDX39B OS=Homo sapiens OX=9606 GN=DDX39B PE=1 SV=1	125	13	428	5.27862e+07	4.00473e+07	1.09898e+08	6.62196e+07	4.69209e+07	4.54916e+07	4.30728e+07	6.01582e+07	5.78822e+07	5.0265e+07	9.7356e+07	1.37239e+08	1.56433e+08	1.56309e+08	1.16448e+08	1.2756e+08	9.28393e+07	1.05261e+08	6.66655e+07	5.79465e+07	1.03481	0.000502232	1.26289
P36269	GGT5	Glutathione hydrolase 5 proenzyme OS=Homo sapiens OX=9606 GN=GGT5 PE=1 SV=2	125	11	586	5.85623e+07	4.65857e+07	1.20267e+08	6.59274e+07	8.7669e+07	6.38843e+07	8.96085e+07	1.46085e+08	1.40509e+08	8.7192e+07	6.82873e+07	379719993	1.8564e+08	7.31015e+07	4.61667e+07	4.00645e+06	1.02931e+07	1.30515e+08	3.97133e+07	1.33994e+08	0.20076	0.791443	0.0937775
P42330	AKR1C3	Aldo-keto reductase family 1 member C3 OS=Homo sapiens OX=9606 GN=AKR1C3 PE=1 SV=4	125	5	323	1.49644e+08	1.40167e+08	5.90571e+07	1.30389e+08	6.84051e+07	1.27993e+08	1.38477e+08	1.26474e+08	9.85066e+07	1.20962e+08	1.15103e+07	1.40419e+07	9.81568e+06	7.57298e+06	7.92722e+06	1.28514e+07	2.95798e+06	0	1.74933e+08	1.59413e+08	-2.11146	0.00166528	-1.09106
Q9UJS0	SLC25A13	Calcium-binding mitochondrial carrier protein Aralar2 OS=Homo sapiens OX=9606 GN=SLC25A13 PE=1 SV=2	125	10	675	1.06597e+08	1.04519e+08	4.54448e+07	1.03123e+08	6.93305e+07	1.38741e+08	116688837	8.95253e+07	8.79367e+07	9.78201e+07	0	1.39949e+07	2.61414e+06	2.03039e+06	0	2.90346e+06	1.81519e+06	8.37099e+06	4.53236e+07	1.05654e+08	-3.4867	4.14356e-06	-2.30643
P16401	H1-5	Histone H1.5 OS=Homo sapiens OX=9606 GN=H1-5 PE=1 SV=3	124	9	226	1.87084e+07	1.35403e+07	1.43815e+08	2.37101e+07	2.98035e+07	1.74046e+07	2.70859e+07	2.79894e+07	2.49161e+07	1.90081e+07	1.32411e+08	2.19585e+08	4.35988e+08	2.44864e+08	532274876	278782566	4.81951e+08	2.5007e+08	1.20495e+08	6.0832e+07	3.11428	0.00222736	1.49303
Q14195	DPYSL3	Dihydropyrimidinase-related protein 3 OS=Homo sapiens OX=9606 GN=DPYSL3 PE=1 SV=1	124	12	570	5.12133e+06	6.17492e+06	5.6231e+07	1.60545e+07	2.41645e+07	4.00357e+07	7.49767e+06	1.97252e+07	1.27786e+07	6.01481e+07	2.26429e+08	1.59238e+08	6.28466e+07	1.01457e+08	9.16599e+07	3.08178e+08	1.71196e+08	1.69208e+08	1.36418e+07	3.3801e+07	2.54677	0.00949367	1.16189
Q9UJU6	DBNL	Drebrin-like protein OS=Homo sapiens OX=9606 GN=DBNL PE=1 SV=1	124	11	430	2.48848e+07	1.99273e+07	4.2961e+07	3.90226e+07	3.12282e+07	8.19645e+06	2.96723e+07	2.30968e+07	2.37985e+07	2.01529e+07	4.0883e+07	6.53881e+07	1.09467e+08	7.06059e+07	4.76685e+07	4.69896e+07	8.28235e+07	5.41573e+07	3.92678e+07	2.48356e+07	1.23559	0.00435036	1.1433
P00915	CA1	Carbonic anhydrase 1 OS=Homo sapiens OX=9606 GN=CA1 PE=1 SV=2	124	12	261	4.57161e+07	2.38358e+08	3.73501e+07	1.0422e+07	6.13968e+07	4.72216e+07	4.69841e+07	1.39063e+08	1.07708e+08	8.94222e+07	2.07187e+08	7.38506e+07	173551880	4.73536e+07	5.29598e+07	7.48788e+08	1.85976e+07	3.0167e+07	6.90507e+07	6.35673e+07	0.939334	0.408571	0.269439
P19440	GGT1	Glutathione hydrolase 1 proenzyme OS=Homo sapiens OX=9606 GN=GGT1 PE=1 SV=2	124	11	569	2.68608e+08	3.492e+08	8.96431e+07	1.87635e+08	3.2603e+08	4.08566e+08	2.15552e+08	4.11723e+08	3.83674e+08	3.67013e+08	0	4.62625e+07	1.32173e+07	0	1.18394e+07	3.39596e+06	0	5.08511e+06	3.51677e+07	3.4317e+08	-4.55733	0.00011678	-2.44571
P55795	HNRNPH2	Heterogeneous nuclear ribonucleoprotein H2 OS=Homo sapiens OX=9606 GN=HNRNPH2 PE=1 SV=1	123	3	449	1.47672e+07	1.3639e+07	1.16734e+07	1.44131e+07	1.00096e+07	1.16701e+07	1.2828e+07	1.47926e+07	1.536e+07	1.36844e+07	1.35522e+07	2.00102e+07	2.5412e+07	2.05288e+07	0	1.44206e+07	9.7039e+06	2.15579e+07	2.35201e+07	1.69814e+07	0.3148	0.338663	0.352596
P50502	ST13	Hsc70-interacting protein OS=Homo sapiens OX=9606 GN=ST13 PE=1 SV=2	123	9	369	9.20124e+07	9.00526e+07	1.10839e+08	6.73748e+07	7.19846e+07	8.63868e+07	7.31201e+07	6.52028e+07	8.53705e+07	8.31429e+07	9.1183e+07	7.87502e+07	6.2776e+07	9.50817e+07	1.14424e+08	8.37956e+07	8.34488e+07	8.3438e+07	7.53172e+07	5.8441e+07	0.0482674	0.721408	0.105859
Q9H223	EHD4	EH domain-containing protein 4 OS=Homo sapiens OX=9606 GN=EHD4 PE=1 SV=1	123	15	541	6.66501e+07	4.56276e+07	7.11438e+07	6.38096e+07	7.53087e+07	6.07601e+07	8.08547e+07	1.10018e+08	9.4825e+07	5.13696e+07	5.69925e+07	6.40398e+07	4.61705e+07	3.15366e+07	1.45832e+07	3.09341e+07	2.51543e+07	3.97109e+07	7.2258e+07	7.23353e+07	-0.765499	0.010023	-0.8141
P15313	ATP6V1B1	V-type proton ATPase subunit B, kidney isoform OS=Homo sapiens OX=9606 GN=ATP6V1B1 PE=1 SV=3	123	4	513	2.10274e+07	1.90775e+07	1.38438e+07	1.43806e+07	8.72882e+06	2.23317e+07	1.01882e+07	1.77989e+07	8.95586e+06	1.71397e+07	0	8.46516e+06	0	4.16097e+06	6.02639e+06	6.64746e+06	0	3.97677e+06	6.23466e+06	1.75138e+07	-1.95962	0.000171652	-1.47461
Q9UM54	MYO6	Unconventional myosin-VI OS=Homo sapiens OX=9606 GN=MYO6 PE=1 SV=4	122	22	1294	8.82007e+07	1.00224e+08	3.07448e+08	2.04851e+08	4.58549e+08	1.87787e+08	1.19247e+08	110452053	8.42848e+07	1.09253e+08	3.5312e+08	8.07532e+07	1.0157e+08	2.79827e+08	3447341148	5.44986e+08	6.89349e+08	2.19056e+08	6.39792e+07	7.69546e+07	1.85908	0.256533	0.412844
O75367	MACROH2A1	Core histone macro-H2A.1 OS=Homo sapiens OX=9606 GN=MACROH2A1 PE=1 SV=4	122	7	372	5.08556e+07	3.03089e+07	115796565	4.76404e+07	5.76335e+07	4.8442e+07	6.59922e+07	7.87615e+07	5.26232e+07	4.35078e+07	1.50718e+08	1.28412e+08	1.58832e+08	1.23734e+08	1.35463e+08	1.08946e+08	7.15308e+07	1.1068e+08	7.29999e+07	7.42651e+07	0.995257	0.000983384	1.14316
Q14019	COTL1	Coactosin-like protein OS=Homo sapiens OX=9606 GN=COTL1 PE=1 SV=3	122	12	142	1.18453e+08	1.63871e+08	5.64969e+07	6.71906e+07	3.7488e+07	5.25716e+07	1.13435e+08	4.10317e+07	5.58985e+07	5.78367e+07	4.50972e+07	9.8103e+07	2.155e+08	9.66685e+07	1.2522e+08	1.01932e+08	1.13254e+08	1.03527e+08	5.31838e+07	6.23448e+07	0.469611	0.237773	0.344914
O75390	CS	Citrate synthase, mitochondrial OS=Homo sapiens OX=9606 GN=CS PE=1 SV=2	122	10	466	1.50333e+08	1.08224e+08	1.0292e+08	1.14729e+08	1.65242e+08	150310992	1.62242e+08	1.92713e+08	138428588	1.602e+08	6.64893e+07	6.93429e+07	6.48196e+07	5.51789e+07	6.76635e+07	1.09929e+08	8.30843e+07	5.69016e+07	1.03488e+08	166215441	-0.942397	0.000122968	-1.51991
P80723	BASP1	Brain acid soluble protein 1 OS=Homo sapiens OX=9606 GN=BASP1 PE=1 SV=2	121	11	227	2.80945e+07	3.53015e+07	6.72894e+07	4.70592e+07	120137034	8.81156e+07	2.63259e+07	5.01276e+07	6.38921e+07	9.33366e+06	1.71033e+08	8.60577e+07	2.40122e+08	5.84012e+07	4.06393e+08	1.02292e+08	2.83649e+08	7.50668e+07	4.78017e+07	1.08762e+07	1.60919	0.0540998	0.746337
P62269	RPS18	40S ribosomal protein S18 OS=Homo sapiens OX=9606 GN=RPS18 PE=1 SV=3	121	8	152	6.02904e+07	5.41553e+07	9.13124e+07	7.26791e+07	7.20217e+07	7.22251e+07	6.11672e+07	7.06121e+07	5.4752e+07	4.97159e+07	1.14055e+08	1.4937e+08	1.26586e+08	1.32654e+08	1.87074e+08	177363713	2.39014e+08	1.25972e+08	9.11184e+07	6.87896e+07	1.17949	0.00175214	1.53886
P51149	RAB7A	Ras-related protein Rab-7a OS=Homo sapiens OX=9606 GN=RAB7A PE=1 SV=1	121	10	207	7.80239e+07	6.98397e+07	123705237	9.16553e+07	7.92085e+07	7.7216e+07	8.2445e+07	1.14761e+08	6.1541e+07	6.52672e+07	1.19967e+08	1.25348e+08	1.59188e+08	1.1827e+08	1.72386e+08	3.12291e+08	1.91325e+08	1.18653e+08	8.27517e+07	7.7485e+07	0.882876	0.0286076	0.858775
P50991	CCT4	T-complex protein 1 subunit delta OS=Homo sapiens OX=9606 GN=CCT4 PE=1 SV=4	121	13	539	6.77077e+07	7.19396e+07	8.06925e+07	8.41081e+07	8.30872e+07	7.56535e+07	6.89676e+07	6.7712e+07	6.40609e+07	6.85476e+07	6.2997e+07	7.17709e+07	1.10615e+08	6.98775e+07	1.27353e+08	1.18118e+08	106060145	7.43632e+07	1.05297e+08	7.14675e+07	0.360648	0.0615862	0.703264
O94925	GLS	Glutaminase kidney isoform, mitochondrial OS=Homo sapiens OX=9606 GN=GLS PE=1 SV=1	121	16	669	1.47471e+08	1.4704e+08	3.69579e+07	1.20689e+08	7.47161e+07	1.21868e+08	1.32085e+08	7.40739e+07	8.18333e+07	1.36691e+08	0	1.07859e+07	4.62754e+06	6.85505e+06	2.30245e+07	3.81605e+06	0	7.89339e+06	9.19991e+07	128995650	-2.69682	0.000187184	-1.43477
P49821	NDUFV1	NADH dehydrogenase [ubiquinone] flavoprotein 1, mitochondrial OS=Homo sapiens OX=9606 GN=NDUFV1 PE=1 SV=4	121	15	464	1.10566e+08	109594049	5.4396e+07	7.59181e+07	103877830	1.07165e+08	1.02145e+08	1.18957e+08	1.0133e+08	1.03551e+08	3.76107e+06	1.19794e+07	1.03806e+07	7.84923e+06	0	8.5918e+06	0	4.70182e+06	3.46208e+07	1.07339e+08	-3.44011	5.22598e-07	-3.20026
Q13418	ILK	Integrin-linked protein kinase OS=Homo sapiens OX=9606 GN=ILK PE=1 SV=2	120	12	452	4.35921e+07	4.07493e+07	6.05841e+07	5.59443e+07	1.11535e+07	2.07649e+07	4.37843e+07	6.64019e+07	6.78167e+07	7.43926e+07	1.56974e+08	1.44951e+08	4.26637e+07	1.20627e+08	1.83687e+07	4.93437e+07	2.59217e+07	9.15022e+07	4.88114e+07	5.22975e+07	0.679101	0.207897	0.423175
P02748	C9	Complement component C9 OS=Homo sapiens OX=9606 GN=C9 PE=1 SV=2	120	15	559	2.11572e+08	1.55886e+08	2.51576e+08	1.31659e+08	1.86581e+08	1.35284e+08	1.60426e+08	1.73607e+08	165148007	9.67185e+07	1.29296e+08	1.61425e+08	2.85527e+08	1.04961e+08	2.10622e+08	3.93198e+08	1.2484e+08	3.55138e+08	1.20162e+08	216546144	0.328182	0.37254	0.295567
Q9Y4L1	HYOU1	Hypoxia up-regulated protein 1 OS=Homo sapiens OX=9606 GN=HYOU1 PE=1 SV=1	118	17	999	3.13332e+07	2.30143e+07	2.6794e+07	4.27623e+07	1.0139e+07	2.0501e+07	3.01643e+07	3.44867e+07	1.71216e+07	2.33306e+07	3.6821e+07	9.52158e+07	6.80564e+07	3.94073e+07	4.20369e+07	6.60545e+07	1.31752e+08	5.38822e+07	4.94128e+07	3.18306e+07	1.31805	0.0134805	1.01765
P47755	CAPZA2	F-actin-capping protein subunit alpha-2 OS=Homo sapiens OX=9606 GN=CAPZA2 PE=1 SV=3	118	8	286	4.55188e+07	5.79848e+07	6.83905e+07	6.27325e+07	5.32268e+07	3.84287e+07	5.30196e+07	4.57943e+07	4.97512e+07	4.76149e+07	7.32701e+07	5.5334e+07	8.96762e+07	5.35061e+07	5.8608e+07	6.00581e+07	5.67736e+07	5.57424e+07	6.45549e+07	4.75034e+07	0.271357	0.0637818	0.556649
P13798	APEH	Acylamino-acid-releasing enzyme OS=Homo sapiens OX=9606 GN=APEH PE=1 SV=4	118	16	732	8.54732e+07	1.12821e+08	5.7693e+07	6.63805e+07	9.53647e+07	1.09055e+08	7.5013e+07	7.77947e+07	7.29137e+07	7.81959e+07	3.42154e+07	3.99316e+07	5.82437e+07	5.71749e+07	9.59154e+06	4.15611e+07	3.30238e+07	3.22849e+07	8.44376e+07	9.74413e+07	-0.93714	0.00150156	-1.07779
P07099	EPHX1	Epoxide hydrolase 1 OS=Homo sapiens OX=9606 GN=EPHX1 PE=1 SV=1	118	16	455	1.43513e+08	1.1187e+08	2.88134e+07	6.29546e+07	3.6388e+07	1.24243e+08	6.1722e+07	7.12255e+07	4.77733e+07	8.75087e+07	3.64946e+07	4.15716e+07	3.23682e+07	3.85996e+07	9.14905e+06	4.58484e+07	4.57575e+07	1.97282e+07	5.0573e+07	8.09786e+07	-1.1256	0.0174129	-0.856577
P48637	GSS	Glutathione synthetase OS=Homo sapiens OX=9606 GN=GSS PE=1 SV=1	118	13	474	9.58711e+07	9.49735e+07	4.81281e+07	7.55625e+07	1.02185e+08	1.34078e+08	7.46667e+07	6.56533e+07	8.04683e+07	8.69509e+07	3.12524e+07	3.54242e+07	3.21459e+07	2.18187e+07	3.09452e+07	2.31824e+07	2.45039e+07	3.30022e+07	4.92183e+07	7.27284e+07	-1.45678	0.000182697	-1.82913
O43390	HNRNPR	Heterogeneous nuclear ribonucleoprotein R OS=Homo sapiens OX=9606 GN=HNRNPR PE=1 SV=1	117	10	633	4.58279e+07	4.18258e+07	1.03983e+08	5.48455e+07	3.7889e+07	3.96891e+07	5.10165e+07	5.65908e+07	4.93389e+07	3.98692e+07	1.56069e+08	1.29098e+08	1.35634e+08	141680533	1.57108e+08	8.4646e+07	8.48012e+07	108715823	7.0096e+07	6.27296e+07	1.1877	0.000787959	1.35203
Q15366	PCBP2	Poly(rC)-binding protein 2 OS=Homo sapiens OX=9606 GN=PCBP2 PE=1 SV=1	117	5	365	2.22355e+07	2.2324e+07	5.36782e+07	4.45873e+07	3.79079e+07	3.45327e+07	2.56897e+07	3.06037e+07	2.25764e+07	2.04379e+07	5.99199e+07	4.34928e+07	8.71998e+07	5.34873e+07	8.99784e+07	7.14536e+07	6.51606e+07	3.94974e+07	3.22287e+07	2.66547e+07	0.938013	0.00391873	0.968845
P20073	ANXA7	Annexin A7 OS=Homo sapiens OX=9606 GN=ANXA7 PE=1 SV=3	117	14	488	8.68249e+07	8.43619e+07	9.60961e+07	8.73057e+07	6.30434e+07	1.01063e+08	5.65952e+07	9.94597e+07	7.05757e+07	7.27911e+07	1.15035e+08	1.12176e+08	1.30452e+08	1.00832e+08	7.42506e+07	1.34027e+08	9.50237e+07	8.69741e+07	8.56948e+07	8.90956e+07	0.343837	0.0340629	0.646631
Q16762	TST	Thiosulfate sulfurtransferase OS=Homo sapiens OX=9606 GN=TST PE=1 SV=4	117	12	297	2.6236e+08	2.58202e+08	85456626	1.49745e+08	1.31287e+08	3.33763e+08	2.48707e+08	2.50218e+08	2.08342e+08	2.69406e+08	5.85842e+06	8.69501e+06	2.62484e+06	7.49752e+06	0	3.13359e+06	2.23089e+06	1.45759e+07	6.56306e+07	2.39006e+08	-4.16504	7.94331e-05	-2.27972
P39059	COL15A1	Collagen alpha-1(XV) chain OS=Homo sapiens OX=9606 GN=COL15A1 PE=1 SV=2	116	16	1388	9.99858e+06	7.07305e+06	1.04591e+08	5.8805e+07	3.05915e+07	2.03808e+07	2.46703e+07	2.41303e+07	2.65711e+07	2.29575e+07	2.15464e+08	2.23088e+08	1.20688e+08	4.47458e+08	4.5117e+07	5.28826e+07	5.06481e+07	1.19531e+08	5.28859e+07	2.92689e+07	2.16147	0.0589855	0.75451
P63241	EIF5A	Eukaryotic translation initiation factor 5A-1 OS=Homo sapiens OX=9606 GN=EIF5A PE=1 SV=2	116	9	154	5.84027e+07	4.74618e+07	5.26661e+07	5.22153e+07	3.30742e+07	4.01611e+07	5.43625e+07	6.23195e+07	5.14544e+07	5.8411e+07	7.50371e+07	9.5395e+07	1.24282e+08	6.49821e+07	5.2096e+07	6.01409e+07	9.12388e+07	8.62173e+07	7.38014e+07	5.64304e+07	0.654386	0.0095379	1.01016
P22392	NME2	Nucleoside diphosphate kinase B OS=Homo sapiens OX=9606 GN=NME2 PE=1 SV=1	116	4	152	1.00247e+08	7.40898e+07	9.69283e+07	8.39821e+07	7.44553e+07	6.80882e+07	9.87724e+07	9.13274e+07	6.8634e+07	8.34427e+07	9.12791e+07	1.35467e+08	8.50813e+07	7.83039e+07	9.0615e+07	1.05265e+08	1.49318e+08	9.40898e+07	1.60129e+08	9.58368e+07	0.38844	0.0659445	0.643943
P27487	DPP4	Dipeptidyl peptidase 4 OS=Homo sapiens OX=9606 GN=DPP4 PE=1 SV=2	116	20	766	1.97976e+08	2.14651e+08	9.6886e+07	8.25462e+07	8.11752e+07	1.96834e+08	1.08275e+08	1.25819e+08	6.99531e+07	1.4203e+08	3.41128e+07	4.94307e+07	3.10657e+07	1.32726e+07	4.43633e+07	4.37631e+07	2.97755e+07	8.33146e+06	1.18715e+08	1.09671e+08	-1.66773	0.0017967	-1.10748
A0A0B4J2D5	GATD3B	Glutamine amidotransferase-like class 1 domain-containing protein 3B, mitochondrial OS=Homo sapiens OX=9606 GN=GATD3B PE=1 SV=1	116	11	268	2.21921e+08	2.19723e+08	51546040	1.90508e+08	1.74732e+08	1.72417e+08	2.30101e+08	1.57581e+08	2.23221e+08	2.39454e+08	3.15243e+07	3.01465e+07	3.42144e+07	1.42775e+07	1.62817e+07	1.33625e+07	1.91752e+07	1.48746e+07	7.08937e+07	1.90675e+08	-2.79027	9.83525e-06	-2.29996
Q16836	HADH	Hydroxyacyl-coenzyme A dehydrogenase, mitochondrial OS=Homo sapiens OX=9606 GN=HADH PE=1 SV=3	116	13	314	2.55904e+08	2.93086e+08	9.42662e+07	1.72599e+08	125098774	1.7739e+08	1.88156e+08	1.66961e+08	1.65515e+08	2.39543e+08	2.28308e+07	3.17713e+07	1.06953e+07	14122209	1.46818e+07	1.25724e+07	1.03845e+07	1.77293e+07	41705274	1.7648e+08	-3.25991	8.54924e-05	-2.5118
P61586	RHOA	Transforming protein RhoA OS=Homo sapiens OX=9606 GN=RHOA PE=1 SV=1	115	3	193	6.16386e+07	5.05297e+07	8.98558e+07	6.70401e+07	3.68825e+07	5.19201e+07	8.06099e+07	7.05787e+07	5.63814e+07	5.66517e+07	119855386	1.38276e+08	1.34326e+08	1.28853e+08	1.5553e+08	2.33523e+08	1.74168e+08	122524868	1.06411e+08	7.40599e+07	1.23019	8.56899e-05	1.64466
Q9BS26	ERP44	Endoplasmic reticulum resident protein 44 OS=Homo sapiens OX=9606 GN=ERP44 PE=1 SV=1	115	9	406	2.85258e+07	3.2003e+07	5.76579e+07	4.43127e+07	3.4354e+07	3.19897e+07	3.25055e+07	4.16988e+07	3.38735e+07	3.03522e+07	5.29943e+07	6.58599e+07	7.16101e+07	5.10917e+07	6.27392e+07	1.24267e+08	1.04825e+08	6.75803e+07	5.47171e+07	3.99058e+07	0.988152	0.00657485	1.12665
P07602	PSAP	Prosaposin OS=Homo sapiens OX=9606 GN=PSAP PE=1 SV=2	114	12	524	3.68552e+08	3.9267e+08	2.31893e+08	1.25747e+08	1.8133e+08	2.60327e+08	3.06197e+08	3.11639e+08	2.11034e+08	1.8613e+08	1.59196e+08	2.26086e+08	6.07054e+08	1.13874e+08	4.0645e+08	6.07309e+08	1040337731	199434874	9.25995e+08	2.93863e+08	0.886682	0.144246	0.541976
P05109	S100A8	Protein S100-A8 OS=Homo sapiens OX=9606 GN=S100A8 PE=1 SV=1	113	9	93	1.92915e+07	7.2584e+06	5.5911e+07	1.24612e+07	5.89095e+07	2.55887e+07	3.0916e+07	9.01935e+06	2.11048e+07	1.14608e+07	8.32172e+07	8.08148e+08	2003769227	5.4555e+08	1357140419	2676366517	2430114230	356636143	6.55382e+08	2.07755e+07	5.58937	0.0137019	1.30238
P02765	AHSG	Alpha-2-HS-glycoprotein OS=Homo sapiens OX=9606 GN=AHSG PE=1 SV=2	113	7	367	5.3336e+07	4.84831e+07	1.15447e+08	0	8.48818e+07	6.22795e+07	6.79435e+07	4.94593e+07	1.60449e+08	1.16714e+08	1.27446e+08	7.69722e+07	4.64265e+07	3.43344e+08	5.02432e+07	8.50472e+07	6.95125e+07	6.42963e+07	4.61352e+07	3.82623e+07	0.412867	0.537344	0.190728
Q9Y2Q3	GSTK1	Glutathione S-transferase kappa 1 OS=Homo sapiens OX=9606 GN=GSTK1 PE=1 SV=3	113	8	226	1.33128e+08	1.23057e+08	4.1232e+07	7.87496e+07	6.01804e+07	7.52588e+07	1.00179e+08	1.29564e+08	9.34186e+07	1.42206e+08	2.04284e+07	3.17365e+07	2.9931e+07	2.05063e+07	2.10275e+07	2.2264e+07	2.59465e+07	2.07043e+07	6.95418e+07	1.33238e+08	-1.74627	0.000457437	-1.45709
P23786	CPT2	Carnitine O-palmitoyltransferase 2, mitochondrial OS=Homo sapiens OX=9606 GN=CPT2 PE=1 SV=2	113	18	658	9.57586e+07	1.15634e+08	3.49935e+07	1.00749e+08	9.76173e+07	1.14062e+08	113798111	9.14309e+07	7.8487e+07	1.23135e+08	5.25453e+06	1.00007e+07	6.98314e+06	3.54929e+06	1.59116e+07	9.36925e+06	1.91993e+07	6.32598e+06	8.27879e+07	9.47027e+07	-2.44703	4.82805e-05	-1.65467
Q96HC4	PDLIM5	PDZ and LIM domain protein 5 OS=Homo sapiens OX=9606 GN=PDLIM5 PE=1 SV=5	112	15	596	5.86967e+07	1.16306e+08	7.13393e+07	7.04788e+07	5.92601e+07	2.93475e+07	6.23158e+07	4.32098e+07	4.74348e+07	5.76981e+07	9.0923e+07	1.35649e+08	1.14183e+08	1.06009e+08	4.78412e+07	1.20027e+08	7.0409e+07	109365400	4.56651e+07	6.33818e+07	0.599383	0.0450423	0.609193
O00264	PGRMC1	Membrane-associated progesterone receptor component 1 OS=Homo sapiens OX=9606 GN=PGRMC1 PE=1 SV=3	112	8	195	9.3372e+07	9.94326e+07	4.90292e+07	4.72203e+07	4.60878e+07	7.85374e+07	8.7118e+07	6.17585e+07	4.85379e+07	6.131e+07	3.1697e+08	3.13346e+07	9.31739e+06	3.3476e+08	5.27245e+07	8.41503e+06	5.43596e+06	4.16472e+07	2.8326e+07	6.882e+07	0.453928	0.659922	0.170887
P62820	RAB1A	Ras-related protein Rab-1A OS=Homo sapiens OX=9606 GN=RAB1A PE=1 SV=3	112	4	205	9.66546e+07	1.20774e+08	9.35405e+07	1.21174e+08	1.343e+08	1.19479e+08	1.26314e+08	1.23182e+08	9.48149e+07	9.26274e+07	8.1736e+07	8.86789e+07	1.25442e+08	7.36032e+07	1.35264e+08	2.27721e+08	1.61501e+08	9.81527e+07	1.15834e+08	9.43399e+07	0.132696	0.584214	0.178546
P20711	DDC	Aromatic-L-amino-acid decarboxylase OS=Homo sapiens OX=9606 GN=DDC PE=1 SV=2	112	13	480	2.45457e+08	213775440	7.43272e+07	1.83603e+08	8.57296e+07	3.14245e+08	2.65284e+08	1.24112e+08	1.13744e+08	1.86235e+08	3.56528e+08	0	0	0	3.43619e+06	0	0	0	9.51756e+07	8.92154e+07	-1.83682	0.0257955	-0.69004
Q9BTZ2	DHRS4	Dehydrogenase/reductase SDR family member 4 OS=Homo sapiens OX=9606 GN=DHRS4 PE=1 SV=3	112	11	278	1.21346e+08	1.73392e+08	2.20954e+07	8.60336e+07	5.42005e+07	2.52953e+08	1.37567e+08	9.30025e+07	1.06482e+08	1.58796e+08	0	4.79661e+06	4.22812e+06	0	0	3.53506e+06	0	0	2.15038e+07	1.23877e+08	-4.9937	0.00128331	-1.70616
P19367	HK1	Hexokinase-1 OS=Homo sapiens OX=9606 GN=HK1 PE=1 SV=3	111	13	917	2.47211e+07	1.10659e+07	3.04103e+07	5.12611e+07	3.49537e+07	1.70769e+07	3.41494e+07	5.72103e+07	3.00734e+07	2.2503e+07	3.17222e+07	4.5602e+07	6.39516e+07	4.4756e+07	3.28369e+07	1.08801e+08	6.82049e+07	4.39362e+07	4.52825e+07	4.48612e+07	0.782146	0.0425689	0.625283
P62241	RPS8	40S ribosomal protein S8 OS=Homo sapiens OX=9606 GN=RPS8 PE=1 SV=2	111	9	208	2220369204	13083485969	1860546038	414657811	2663280244	7283787234	3009436665	4733141220	5192116165	3058183178	3173558979	1893111099	4803539918	1736944737	2596686426	13441904665	7.07562e+08	7.88416e+08	1721227290	2552389784	-0.343766	0.666324	-0.128649
P31937	HIBADH	3-hydroxyisobutyrate dehydrogenase, mitochondrial OS=Homo sapiens OX=9606 GN=HIBADH PE=1 SV=2	111	8	336	1.92337e+08	2.3587e+08	6.71226e+07	1.13352e+08	1.90388e+08	1.45672e+08	1.2896e+08	2.53381e+08	2.08587e+08	1.89311e+08	2.57752e+07	2.44934e+07	5.00047e+06	7.63757e+06	0	0	0	1.2478e+07	3.78774e+07	1.56517e+08	-3.77684	8.23743e-05	-2.35846
P61204	ARF3	ADP-ribosylation factor 3 OS=Homo sapiens OX=9606 GN=ARF3 PE=1 SV=2	110	4	181	6.39852e+07	7.09773e+07	6.1728e+07	6.37656e+07	5.02101e+07	5.85429e+07	7.69035e+07	7.23731e+07	7.92355e+07	8.79951e+07	8.83041e+07	128466842	1.19753e+08	9.73098e+07	7.74989e+07	1.19144e+08	9.20192e+07	9.8882e+07	9.8495e+07	7.20134e+07	0.575825	0.000461753	1.27841
Q14247	CTTN	Src substrate cortactin OS=Homo sapiens OX=9606 GN=CTTN PE=1 SV=2	110	15	550	4.58886e+07	4.379e+07	5.29381e+07	5.71982e+07	3.45763e+07	4.11008e+07	4.66146e+07	4.11782e+07	3.92137e+07	3.88705e+07	2.97914e+07	3.68463e+07	2.51119e+07	3.21927e+07	1.71721e+07	1.15552e+06	1.95546e+07	4.28668e+07	5.12939e+07	4.3223e+07	-0.633922	0.0183969	-0.764514
P09110	ACAA1	3-ketoacyl-CoA thiolase, peroxisomal OS=Homo sapiens OX=9606 GN=ACAA1 PE=1 SV=2	110	13	424	1.69686e+08	1.7218e+08	4.58252e+07	1.22945e+08	105092243	2.12984e+08	1.46052e+08	119354866	8.33319e+07	1.92665e+08	0	6.01709e+06	8.90819e+06	592340	8.6438e+06	2.968e+06	5.65507e+06	2.36535e+06	8.97492e+07	1.16465e+08	-3.30346	0.000124238	-1.62094
P08311	CTSG	Cathepsin G OS=Homo sapiens OX=9606 GN=CTSG PE=1 SV=2	109	12	255	1.26601e+07	8.77134e+06	3.89063e+07	1.59869e+07	2.18007e+07	8.36192e+06	1.35282e+07	7.4816e+06	8.44297e+06	6.50658e+06	3.81464e+08	3.97488e+08	9.30585e+08	4.55474e+08	5.06936e+08	1819563700	1077345811	1.80295e+08	1.0656e+08	2.54616e+07	5.51335	0.0178934	1.22574
P04114	APOB	Apolipoprotein B-100 OS=Homo sapiens OX=9606 GN=APOB PE=1 SV=2	109	31	4563	1.25384e+07	1.55129e+07	3.58539e+07	1.02886e+07	6.45644e+07	2.99907e+07	5.50674e+07	3.26186e+07	8.81474e+07	1.72026e+07	1.53029e+08	2.85605e+07	4.90535e+07	2.21939e+08	2.08583e+08	106315261	9.07758e+07	9.53224e+07	4.12769e+07	1.41028e+07	1.61136	0.0291381	0.818733
Q9Y4G6	TLN2	Talin-2 OS=Homo sapiens OX=9606 GN=TLN2 PE=1 SV=4	108	5	2542	4.72376e+06	555684	4.12378e+06	5.35831e+06	5.4536e+06	695104	8.49642e+06	8.26787e+06	2.86391e+07	9.22456e+06	2.13534e+07	1.59403e+07	1.13733e+07	2.69305e+07	1.31375e+06	1.54596e+07	2.7991e+07	1.93053e+07	2.91441e+07	6.20582e+06	1.31214	0.0230113	0.69853
Q14914	PTGR1	Prostaglandin reductase 1 OS=Homo sapiens OX=9606 GN=PTGR1 PE=1 SV=2	108	12	329	9.60859e+07	1.33628e+08	3.74969e+07	9.57502e+07	6.77611e+07	8.47964e+07	1.1891e+08	1.11584e+08	9.78915e+07	9.77152e+07	1.58404e+07	6.86685e+06	9.67736e+06	6.22253e+06	2.24571e+07	0	4.59648e+06	3.22974e+06	5.14059e+07	8.22644e+07	-2.81655	1.49705e-05	-1.99941
Q96DG6	CMBL	Carboxymethylenebutenolidase homolog OS=Homo sapiens OX=9606 GN=CMBL PE=1 SV=1	108	12	245	3.58299e+08	4.55917e+08	6.64907e+07	2.88682e+08	1.98693e+08	3.22119e+08	2.82458e+08	2.42072e+08	1.68674e+08	250620890	1.00223e+07	4.69181e+06	9.73943e+06	2.52397e+06	9.26782e+06	8.16719e+06	3.32755e+06	1.78781e+06	1.24205e+08	2.23197e+08	-3.77033	0.000216018	-1.75944
Q15746	MYLK	Myosin light chain kinase, smooth muscle OS=Homo sapiens OX=9606 GN=MYLK PE=1 SV=4	107	22	1914	3.31585e+07	2.40603e+07	9.9876e+07	3.94898e+07	2.75928e+07	2.33668e+07	3.8602e+07	5.09074e+07	5.52789e+07	8.70481e+07	4.38284e+08	1.95544e+08	4.4634e+07	2.41046e+08	1.64471e+08	3.46725e+07	4.13586e+07	2.23152e+08	1.67519e+07	5.26795e+07	1.6981	0.0827856	0.693029
Q07960	ARHGAP1	Rho GTPase-activating protein 1 OS=Homo sapiens OX=9606 GN=ARHGAP1 PE=1 SV=1	107	8	439	3.39737e+07	2.1278e+07	6.4508e+07	4.66495e+07	2.96307e+07	2.71109e+07	2.79868e+07	4.12031e+07	3.43231e+07	4.15218e+07	7.55587e+07	8.04111e+07	8.39609e+07	5.4213e+07	37077000	7.71925e+07	5.86685e+07	7.92154e+07	4.86654e+07	4.36744e+07	0.844369	0.00173211	1.06188
P52565	ARHGDIA	Rho GDP-dissociation inhibitor 1 OS=Homo sapiens OX=9606 GN=ARHGDIA PE=1 SV=3	107	8	204	1.04594e+08	1.30098e+08	1.31519e+08	1.18281e+08	1.02513e+08	7.80517e+07	9.39174e+07	8.50865e+07	8.66265e+07	9.46566e+07	1.72831e+08	1.62458e+08	2.35549e+08	1.33799e+08	1.36936e+08	1.77877e+08	197596212	1.61178e+08	1.67929e+08	1.15606e+08	0.744579	0.000144691	1.47757
Q99832	CCT7	T-complex protein 1 subunit eta OS=Homo sapiens OX=9606 GN=CCT7 PE=1 SV=2	107	13	543	5.00129e+07	5.65164e+07	3.91617e+07	3.90841e+07	1.80669e+07	2.19405e+07	4.19681e+07	3.7462e+07	2.92956e+07	3.68422e+07	2.04942e+07	4.21711e+07	5.06341e+07	4.47679e+07	3.76658e+07	47031835	3.99954e+07	3.90273e+07	7.06822e+07	3.41495e+07	0.235695	0.33856	0.278954
P10599	TXN	Thioredoxin OS=Homo sapiens OX=9606 GN=TXN PE=1 SV=3	107	6	105	2.15159e+08	2.4601e+08	101994786	1.3334e+08	111383207	1.99499e+08	1.64799e+08	1.52068e+08	1.69114e+08	2.00497e+08	1.16263e+08	6.56129e+07	9.5406e+07	7.60775e+07	1.1766e+08	7.93062e+07	126620245	1.32753e+08	1.17797e+08	1.64669e+08	-0.716902	0.00433765	-0.988702
O75348	ATP6V1G1	V-type proton ATPase subunit G 1 OS=Homo sapiens OX=9606 GN=ATP6V1G1 PE=1 SV=3	107	6	118	1.04357e+08	1.44346e+08	5.89271e+07	9.86683e+07	1.02438e+08	120252074	8.15394e+07	5.73315e+07	5.69112e+07	9.11577e+07	1.76298e+07	1.50523e+08	4.1979e+07	1.35873e+07	6.57389e+07	4.98162e+07	7.14364e+07	1.81055e+07	7.16067e+07	7.04104e+07	-0.720082	0.07567	-0.533811
P48681	NES	Nestin OS=Homo sapiens OX=9606 GN=NES PE=1 SV=2	107	22	1621	7.08357e+07	9.33328e+07	9.91806e+07	8.63126e+07	7.10873e+07	1.06324e+08	9.91214e+07	6.69071e+07	7.31615e+07	7.99444e+07	7.08142e+07	4.04235e+07	2.13914e+07	5.8037e+07	5.21797e+07	3.0166e+07	3.92493e+07	3.82576e+07	6.53334e+07	8.26189e+07	-0.872938	0.000320449	-1.32593
P25325	MPST	3-mercaptopyruvate sulfurtransferase OS=Homo sapiens OX=9606 GN=MPST PE=1 SV=3	107	12	297	9.95513e+07	1.4842e+08	7.27094e+07	1.50159e+08	9.80061e+07	1.04286e+08	1.05398e+08	109520618	111052017	1.49688e+08	2.66114e+07	2.25175e+07	1.57841e+07	2.22667e+07	3.38856e+07	6.88328e+07	3.12585e+07	1.24785e+07	1.2063e+08	1.04478e+08	-1.54521	0.000352801	-1.31598
Q02978	SLC25A11	Mitochondrial 2-oxoglutarate/malate carrier protein OS=Homo sapiens OX=9606 GN=SLC25A11 PE=1 SV=3	107	10	314	8.44796e+07	7.93129e+07	7.05078e+07	1.02683e+08	1.42046e+08	1.16123e+08	8.97873e+07	1.01628e+08	8.22113e+07	7.44207e+07	2.35013e+07	2.18968e+07	2.69282e+07	17669768	2.99524e+07	5.25506e+07	3.45999e+07	2.06632e+07	3.58495e+07	7.45248e+07	-1.68715	1.16286e-05	-2.10496
P21397	MAOA	Amine oxidase [flavin-containing] A OS=Homo sapiens OX=9606 GN=MAOA PE=1 SV=1	107	8	527	1.60202e+08	1.30873e+08	7.92541e+07	1.32716e+08	148204182	1.81184e+08	1.94169e+08	1.63552e+08	1.49951e+08	1.52265e+08	4.39739e+06	2.92106e+06	3.18671e+07	0	1.32474e+07	9.33902e+06	0	1.80638e+06	1.19866e+08	1.51629e+08	-2.87219	1.21879e-05	-1.9457
P52907	CAPZA1	F-actin-capping protein subunit alpha-1 OS=Homo sapiens OX=9606 GN=CAPZA1 PE=1 SV=3	106	10	286	3.538e+07	3.67159e+07	9.19477e+07	5.80589e+07	5.06598e+07	3.67703e+07	3.31032e+07	3.70878e+07	3.16994e+07	3.4751e+07	104329381	1.34594e+08	2.10833e+08	1.17953e+08	2.1116e+08	2.42631e+08	2.13092e+08	1.47152e+08	8.46144e+07	6.29405e+07	1.86856	0.000880216	1.65359
Q02952	AKAP12	A-kinase anchor protein 12 OS=Homo sapiens OX=9606 GN=AKAP12 PE=1 SV=4	106	22	1782	1.53749e+07	7.48366e+06	1.04367e+08	2.94937e+07	2.48934e+07	1.02264e+07	1.85598e+07	20043109	1.67181e+07	1.95581e+07	1.92217e+08	119140900	8.54919e+07	156187605	2.13561e+07	0	0	7.86772e+07	5.67669e+07	2.3894e+07	1.56418	0.0931761	0.576924
P61247	RPS3A	40S ribosomal protein S3a OS=Homo sapiens OX=9606 GN=RPS3A PE=1 SV=2	105	12	264	3.98359e+07	3.2011e+07	5.42099e+07	4.74588e+07	3.7653e+07	4.46117e+07	4.20597e+07	4.68174e+07	3.66104e+07	3.75456e+07	9.40157e+07	1.02561e+08	1.03466e+08	7.35834e+07	1.17606e+08	1.01637e+08	1.36423e+08	1.05074e+08	7.49954e+07	4.87573e+07	1.27055	4.00449e-06	2.41175
P27348	YWHAQ	14-3-3 protein theta OS=Homo sapiens OX=9606 GN=YWHAQ PE=1 SV=1	105	8	245	2.9442e+07	3.15412e+07	8.08977e+07	5.03372e+07	6.589e+07	3.17502e+07	3.64611e+07	4.13084e+07	3.77158e+07	2.42064e+07	1.13404e+08	5.97571e+07	9.83601e+07	7.80032e+07	1.33916e+08	6.03486e+07	7.77517e+07	6.75642e+07	5.07168e+07	3.45859e+07	0.936356	0.00535786	0.910973
P11940	PABPC1	Polyadenylate-binding protein 1 OS=Homo sapiens OX=9606 GN=PABPC1 PE=1 SV=2	105	13	636	4.04075e+07	4.01804e+07	5.17411e+07	4.91948e+07	2.81002e+07	2.97216e+07	3.51865e+07	3.17943e+07	2.97695e+07	3.51372e+07	4.5855e+07	7.56281e+07	5.47498e+07	6.25578e+07	5.28024e+07	8.34949e+07	8.91512e+07	6.94051e+07	7.48759e+07	4.46509e+07	0.864983	0.000231964	1.411
Q96JY6	PDLIM2	PDZ and LIM domain protein 2 OS=Homo sapiens OX=9606 GN=PDLIM2 PE=1 SV=1	105	10	352	8.7693e+07	1.00973e+08	6.97198e+07	7.82728e+07	2.48253e+07	1.48973e+08	1.08444e+08	4.19518e+07	1.001e+08	1.05115e+08	1.79438e+07	4.93822e+07	1.03512e+07	1.63915e+07	0	3.3518e+06	4.74747e+06	1.36898e+07	4.67928e+07	7.17687e+07	-2.2607	0.000457437	-1.35486
Q13162	PRDX4	Peroxiredoxin-4 OS=Homo sapiens OX=9606 GN=PRDX4 PE=1 SV=1	104	8	271	8.0665e+06	2.70587e+06	7.59923e+06	4.84276e+06	6.48488e+06	1.56141e+06	5.47118e+06	7.4768e+06	4.58155e+06	6.46894e+06	4.7316e+07	9.84222e+07	6.30273e+07	2.13274e+07	3.63051e+07	1.0986e+08	3.03939e+08	5.09265e+07	2.24679e+07	1.74491e+07	3.9215	0.0537017	0.918859
P50995	ANXA11	Annexin A11 OS=Homo sapiens OX=9606 GN=ANXA11 PE=1 SV=1	104	12	505	4.67846e+07	3.33054e+07	6.53293e+07	5.59682e+07	4.40724e+07	3.91572e+07	4.9365e+07	6.69332e+07	4.01581e+07	4.02721e+07	7.40798e+07	1.04677e+08	1.26698e+08	1.07123e+08	5.81332e+07	203186061	5.66335e+07	8.21131e+07	8.90353e+07	5.71949e+07	1.05754	0.0189596	0.979338
P35237	SERPINB6	Serpin B6 OS=Homo sapiens OX=9606 GN=SERPINB6 PE=1 SV=3	104	11	376	6.88593e+07	8.59913e+07	8.62368e+07	8.5543e+07	6.60891e+07	7.02376e+07	5.87728e+07	6.90306e+07	7.21469e+07	7.66942e+07	1.0176e+08	1.11449e+08	9.29956e+07	1.02693e+08	8.28071e+07	3.68907e+07	7.59075e+07	8.72186e+07	6.4269e+07	5.41293e+07	0.183624	0.289101	0.329222
Q92597	NDRG1	Protein NDRG1 OS=Homo sapiens OX=9606 GN=NDRG1 PE=1 SV=1	104	9	394	9.47666e+07	1.0546e+08	4.83996e+07	4.54036e+07	6.78217e+07	7.44129e+07	6.78923e+07	6.91363e+07	8.01215e+07	8.69533e+07	2.82099e+07	3.386e+07	1.82881e+07	2.49152e+07	9.0914e+06	5.8486e+07	4.5602e+07	1.57796e+07	2.6924e+07	6.68781e+07	-1.35133	0.000231964	-1.3928
P05026	ATP1B1	Sodium/potassium-transporting ATPase subunit beta-1 OS=Homo sapiens OX=9606 GN=ATP1B1 PE=1 SV=1	104	9	303	257140826	2.07697e+08	1.65637e+08	3.18388e+08	4.07787e+08	232968030	2.6746e+08	4.12317e+08	2.87499e+08	2.51146e+08	5.70675e+07	5.57707e+07	3.41607e+07	5.22263e+07	4.82432e+07	4.02055e+07	4.89754e+07	4.49174e+07	5.78936e+07	2.69402e+08	-2.52376	8.23743e-05	-2.78409
O75306	NDUFS2	NADH dehydrogenase [ubiquinone] iron-sulfur protein 2, mitochondrial OS=Homo sapiens OX=9606 GN=NDUFS2 PE=1 SV=2	104	14	463	8.52508e+07	8.31472e+07	3.63149e+07	8.79293e+07	9.09932e+07	9.06632e+07	9.50443e+07	1.03446e+08	9.84933e+07	8.89396e+07	2.95347e+06	1.98567e+07	1.26716e+07	5.7235e+06	1.20331e+07	3.72586e+06	0	1.04716e+07	3.02175e+07	9.70077e+07	-2.98696	9.417e-07	-2.83893
P16083	NQO2	Ribosyldihydronicotinamide dehydrogenase [quinone] OS=Homo sapiens OX=9606 GN=NQO2 PE=1 SV=5	104	11	231	200238749	2.78056e+08	4.3176e+07	8.46642e+07	115989588	1.45183e+08	1.53352e+08	1.12057e+08	5.46672e+07	1.16782e+08	7.44128e+06	1.84059e+06	1.87062e+06	0	0	9.23024e+06	3.01096e+06	8.22731e+06	2.08915e+07	1.37477e+08	-4.48232	0.00129185	-1.7232
P04439	HLA-A	HLA class I histocompatibility antigen, A alpha chain OS=Homo sapiens OX=9606 GN=HLA-A PE=1 SV=2	103	7	365	4.98177e+07	3.7637e+07	5.73247e+07	3.29726e+07	4.50335e+07	2.24615e+07	6.57681e+07	3.08121e+07	6.38635e+07	4.02052e+07	1.04278e+08	1.58966e+08	3.30309e+08	1.1503e+08	3.60719e+08	2.8945e+08	2.14213e+08	1.51205e+08	1.59269e+08	7.74184e+07	2.23059	0.00281096	1.59248
O95336	PGLS	6-phosphogluconolactonase OS=Homo sapiens OX=9606 GN=PGLS PE=1 SV=2	103	9	258	4.75003e+07	6.25998e+07	7.87009e+07	4.87612e+07	7.17811e+07	6.22913e+07	5.72004e+07	5.12764e+07	5.0818e+07	4.78683e+07	4.8319e+07	6.37578e+07	7.87376e+07	5.6863e+07	7.44213e+07	7.43197e+07	6.05594e+07	4.9319e+07	4.5705e+07	5.41377e+07	0.083617	0.597306	0.157406
P30044	PRDX5	Peroxiredoxin-5, mitochondrial OS=Homo sapiens OX=9606 GN=PRDX5 PE=1 SV=4	103	8	214	2.51296e+08	2.35912e+08	1.45633e+08	1.75195e+08	1.89051e+08	2.81168e+08	2.16738e+08	2.64573e+08	2.213e+08	2.33319e+08	1.05731e+08	1.23228e+08	1.52285e+08	1.02979e+08	116330238	2.28285e+08	1.22342e+08	1.16579e+08	1.52856e+08	2.58157e+08	-0.707166	0.00112011	-1.12407
P13716	ALAD	Delta-aminolevulinic acid dehydratase OS=Homo sapiens OX=9606 GN=ALAD PE=1 SV=1	103	10	330	1.35349e+08	1.56442e+08	6.43072e+07	7.16965e+07	5.75082e+07	1.0372e+08	1.09502e+08	7.20681e+07	8.37497e+07	1.16708e+08	4.70238e+07	2.91251e+07	4.55397e+07	4.91888e+07	2.22295e+07	5.56776e+07	2.12265e+07	3.27282e+07	3.44834e+07	7.8414e+07	-1.37384	0.000920931	-1.3955
P36543	ATP6V1E1	V-type proton ATPase subunit E 1 OS=Homo sapiens OX=9606 GN=ATP6V1E1 PE=1 SV=1	103	12	226	1.50997e+08	1.98147e+08	5.68975e+07	1.17205e+08	1.0536e+08	1.69321e+08	1.1694e+08	8.61633e+07	7.53481e+07	1.32039e+08	2.29246e+07	2.7605e+07	2.21275e+07	1.6059e+07	3.57786e+07	5.41035e+07	7.41138e+07	3.10856e+07	1.02926e+08	125641442	-1.49174	0.00125924	-1.1375
Q96DC8	ECHDC3	Enoyl-CoA hydratase domain-containing protein 3, mitochondrial OS=Homo sapiens OX=9606 GN=ECHDC3 PE=1 SV=2	103	9	303	1.28327e+08	1.45493e+08	7.16537e+06	0	7.89826e+07	1.43847e+08	1.0135e+08	1.45992e+08	1.16779e+08	6.2642e+07	0	2.2758e+06	0	0	0	0	0	0	3.60108e+07	1.03003e+08	-4.45121	0.00214254	-1.40131
P12429	ANXA3	Annexin A3 OS=Homo sapiens OX=9606 GN=ANXA3 PE=1 SV=3	102	14	323	2.42058e+07	2.21915e+07	7.53838e+07	2.34525e+07	4.71524e+07	1.54962e+07	2.62038e+07	4.23755e+07	1.82776e+07	1.87931e+07	5.62767e+07	9.04933e+07	2.33358e+08	8.19559e+07	7.67359e+07	1437270048	2.42544e+08	5.68968e+07	6.62034e+07	1.05707e+07	3.0529	0.226119	0.520734
P62826	RAN	GTP-binding nuclear protein Ran OS=Homo sapiens OX=9606 GN=RAN PE=1 SV=3	102	9	216	4.63575e+07	5.07707e+07	7.77145e+07	5.13328e+07	4.90907e+07	3.94112e+07	6.03237e+07	5.07713e+07	4.59404e+07	4.67584e+07	1.25905e+08	1.07093e+08	142771732	1.19657e+08	1.69043e+08	179670069	1.2992e+08	1.21533e+08	1.1141e+08	5.32759e+07	1.3711	4.31948e-05	2.44005
Q7Z406	MYH14	Myosin-14 OS=Homo sapiens OX=9606 GN=MYH14 PE=1 SV=2	102	2	1995	5.90554e+06	3.2816e+06	1.71663e+07	1.20438e+07	1.88562e+07	4.51912e+06	5.76308e+06	1.99844e+07	1.25926e+07	7.67931e+06	2.45933e+07	7.53538e+06	0	8.84641e+06	9.80001e+06	1.04997e+07	0	1.17945e+07	2.35881e+06	5.66844e+06	-0.363071	0.535984	-0.183756
P00734	F2	Prothrombin OS=Homo sapiens OX=9606 GN=F2 PE=1 SV=2	101	12	622	5.42159e+07	4.74105e+07	6.77757e+07	6.12764e+07	1.19466e+08	1.84251e+08	5.02554e+07	6.14489e+07	175889941	6.83326e+07	1.16351e+08	5.79944e+07	8.57719e+07	1.86417e+08	4.02235e+08	4.27894e+08	1.49123e+08	1.17162e+08	3.04104e+07	3.43139e+07	0.973452	0.177988	0.463468
P11216	PYGB	Glycogen phosphorylase, brain form OS=Homo sapiens OX=9606 GN=PYGB PE=1 SV=5	101	12	843	5.7858e+07	3.15848e+07	5.56464e+07	5.74132e+07	3.4989e+07	2.58341e+07	3.73237e+07	2.9177e+07	1.9169e+07	3.29475e+07	4.93682e+07	6.41436e+07	3.53024e+07	3.79465e+07	3.55263e+07	6.45942e+07	3.46438e+07	2.61511e+07	5.41386e+07	3.28704e+07	0.225176	0.40051	0.245302
O43776	NARS1	Asparagine--tRNA ligase, cytoplasmic OS=Homo sapiens OX=9606 GN=NARS1 PE=1 SV=1	101	12	548	4.01131e+07	43356522	4.36878e+07	5.20866e+07	3.39095e+07	2.13805e+07	4.82449e+07	4.53885e+07	3.51054e+07	3.90856e+07	2.15919e+07	3.55333e+07	3.57015e+07	3.32764e+07	1.61434e+07	6.64895e+06	2.48148e+07	2.40265e+07	6.3801e+07	4.17115e+07	-0.469459	0.117859	-0.477194
P08134	RHOC	Rho-related GTP-binding protein RhoC OS=Homo sapiens OX=9606 GN=RHOC PE=1 SV=1	101	1	193	8.72541e+06	1.27143e+07	9.02597e+06	8.99649e+06	6.41134e+06	1.41364e+07	8.43278e+06	9.84727e+06	1.10913e+07	8.55182e+06	4.65882e+06	6.09406e+06	0	3.59674e+06	0	0	2.54586e+06	5.21238e+06	9.79081e+06	9.44023e+06	-1.4663	0.000810094	-1.18302
P17931	LGALS3	Galectin-3 OS=Homo sapiens OX=9606 GN=LGALS3 PE=1 SV=5	100	7	250	4.21509e+07	1.2992e+07	55219401	1.18214e+07	1.4049e+07	1.8147e+07	1.4345e+07	2.24833e+07	1.91653e+07	2.74229e+07	7.57198e+07	9.18746e+07	9.51707e+07	8.17371e+07	1.57155e+08	1.19023e+08	1.64779e+08	6.88157e+07	4.82876e+07	2.4041e+07	2.0763	0.00121531	1.50611
P04899	GNAI2	Guanine nucleotide-binding protein G(i) subunit alpha-2 OS=Homo sapiens OX=9606 GN=GNAI2 PE=1 SV=3	100	8	355	3.86424e+07	3.14935e+07	7.78222e+07	5.04866e+07	4.84789e+07	3.7489e+07	6.34949e+07	7.10359e+07	6.65067e+07	6.78929e+07	1.97448e+08	1.77e+08	1.8903e+08	186757458	1.5353e+08	3.35102e+08	1.99993e+08	1.47184e+08	1.09388e+08	6.23909e+07	1.76741	7.03837e-05	1.79782
P63244	RACK1	Receptor of activated protein C kinase 1 OS=Homo sapiens OX=9606 GN=RACK1 PE=1 SV=3	100	10	317	5.63196e+07	4.75758e+07	9.28408e+07	6.28401e+07	5.39298e+07	6.51176e+07	5.46542e+07	5.99915e+07	5.56558e+07	5.94369e+07	1.09188e+08	1.63017e+08	1.26319e+08	1.21761e+08	1.85634e+08	2.30881e+08	204837518	1.28695e+08	9.69077e+07	7.54196e+07	1.32027	0.00126698	1.64295
P10253	GAA	Lysosomal alpha-glucosidase OS=Homo sapiens OX=9606 GN=GAA PE=1 SV=4	100	14	952	5.87159e+07	3.94852e+07	1.28912e+08	3.13432e+07	4.69072e+07	3.91675e+07	3.00186e+07	7.68603e+07	4.87432e+07	4.57562e+07	7.52576e+07	8.55892e+07	1.42786e+08	5.41138e+07	7.09312e+07	5.91228e+07	6.22788e+07	8.18976e+07	7.80764e+07	6.58612e+07	0.53127	0.121802	0.461446
Q9Y3I0	RTCB	RNA-splicing ligase RtcB homolog OS=Homo sapiens OX=9606 GN=RTCB PE=1 SV=1	100	13	505	4.70428e+07	3.68143e+07	4.38085e+07	4.44915e+07	2.69753e+07	4.00155e+07	3.65601e+07	4.69032e+07	4.07512e+07	3.64463e+07	4.76197e+07	5.00615e+07	3.43439e+07	4.87558e+07	1.99297e+07	2.09454e+07	3.89089e+07	4.03584e+07	4.55825e+07	4.60917e+07	-0.0544271	0.773444	-0.0892553
P00390	GSR	Glutathione reductase, mitochondrial OS=Homo sapiens OX=9606 GN=GSR PE=1 SV=2	100	10	522	7.24204e+07	8.00104e+07	4.98794e+07	5.84049e+07	5.66629e+07	6.51904e+07	5.1329e+07	5.04789e+07	4.0651e+07	4.72936e+07	4.97307e+07	4.21904e+07	6.08053e+07	6.15696e+07	3.51623e+07	3.68196e+07	42373945	3.61231e+07	6.45224e+07	6.9549e+07	-0.262844	0.15264	-0.420772
P35754	GLRX	Glutaredoxin-1 OS=Homo sapiens OX=9606 GN=GLRX PE=1 SV=2	100	6	106	1.39486e+08	1.54997e+08	6.30003e+07	102826033	8.19092e+07	1.40245e+08	7.41706e+07	5.26027e+07	8.71683e+07	8.00405e+07	2.36235e+07	4.18877e+07	2.9869e+07	1.31394e+07	4.21673e+07	9.81594e+07	1.01159e+08	2.8953e+07	1.2918e+08	1.17992e+08	-0.790316	0.0594155	-0.564935
P10515	DLAT	Dihydrolipoyllysine-residue acetyltransferase component of pyruvate dehydrogenase complex, mitochondrial OS=Homo sapiens OX=9606 GN=DLAT PE=1 SV=3	100	9	647	8.5175e+07	7.19772e+07	4.98669e+07	1.0067e+08	1.33854e+08	9.83721e+07	8.13036e+07	9.72776e+07	8.32817e+07	6.96325e+07	3.39748e+07	3.45491e+07	3.80549e+07	1.75699e+07	9.84868e+06	1.30449e+07	2.24802e+07	1.96766e+07	3.8217e+07	8.80635e+07	-1.78602	2.29021e-05	-1.94498
Q9BUT1	BDH2	3-hydroxybutyrate dehydrogenase type 2 OS=Homo sapiens OX=9606 GN=BDH2 PE=1 SV=2	100	10	245	1.67501e+08	2.78721e+08	1.04952e+08	1.16356e+08	1.28631e+08	2.40016e+08	1.98712e+08	1.66169e+08	1.89986e+08	1.70435e+08	4.18086e+07	3.55567e+07	2.32522e+07	2.55221e+07	1.53507e+07	7.20247e+06	0	2.4074e+07	7.33076e+07	1.68196e+08	-2.68762	5.51047e-05	-2.075
P24298	GPT	Alanine aminotransferase 1 OS=Homo sapiens OX=9606 GN=GPT PE=1 SV=3	100	14	496	5.98831e+07	1.28484e+08	3.22661e+07	4.18705e+07	1.16927e+08	1.51657e+08	6.32192e+07	1.3067e+08	2.14103e+08	1.29629e+08	0	0	0	0	0	4.64189e+06	0	4.72153e+06	2.47662e+06	9.80304e+07	-6.34405	0.00108924	-1.88952
P30740	SERPINB1	Leukocyte elastase inhibitor OS=Homo sapiens OX=9606 GN=SERPINB1 PE=1 SV=1	99	16	379	3.644e+07	2.61785e+07	3.91863e+07	3.41769e+07	3.15628e+07	2.32506e+07	2.11921e+07	2.14345e+07	2.26276e+07	1.6863e+07	5.39682e+07	1.24958e+08	2.78817e+08	1.43267e+08	1.35508e+08	4.64998e+08	3.26479e+08	9.34809e+07	1.31566e+08	3.07037e+07	2.83536	0.0135535	1.25935
P07305	H1-0	Histone H1.0 OS=Homo sapiens OX=9606 GN=H1-0 PE=1 SV=3	99	7	194	8.61814e+07	8.77964e+07	2.67728e+08	1.16983e+08	1.60532e+08	1.01172e+08	1.0912e+08	175507281	1.54465e+08	9.49017e+07	4.29406e+08	1.96049e+08	1.62896e+08	268355921	2.65526e+08	7.4993e+07	1.42034e+08	139900023	9.31063e+07	1.19192e+08	0.539958	0.196848	0.390852
Q00325	SLC25A3	Phosphate carrier protein, mitochondrial OS=Homo sapiens OX=9606 GN=SLC25A3 PE=1 SV=2	99	13	362	193305239	1.74165e+08	1.07943e+08	191665775	2.17622e+08	1.21838e+08	2.24864e+08	1.87275e+08	142711850	1.65083e+08	5.46112e+07	6.42649e+07	5.70464e+07	4.72183e+07	7.43949e+07	9.28845e+07	9.55242e+07	5.24026e+07	1.32247e+08	1.5915e+08	-1.21231	9.34717e-05	-1.56133
Q9UJW2	TINAG	Tubulointerstitial nephritis antigen OS=Homo sapiens OX=9606 GN=TINAG PE=2 SV=3	99	14	476	1.23694e+08	1.09832e+08	8.82184e+07	1.61622e+08	5.75785e+07	1.83477e+08	1.29577e+08	1.01154e+08	1.2439e+08	6.99604e+07	0	4.86513e+06	5.25129e+06	0	0	1.65782e+06	0	8.20847e+06	1.46254e+08	8.36923e+07	-2.6377	0.000797912	-1.17645
P05413	FABP3	Fatty acid-binding protein, heart OS=Homo sapiens OX=9606 GN=FABP3 PE=1 SV=4	99	9	133	1.1991e+08	1.43801e+08	7.54619e+07	9.03027e+07	1.68034e+08	1.01004e+08	1.75423e+08	5.89611e+07	1.14985e+08	1.36294e+08	1.44642e+07	1.07554e+07	0	0	0	5.32731e+06	1.3651e+07	4.55184e+06	1.05524e+08	129116622	-2.78832	0.000122968	-1.48949
Q8WU39	MZB1	Marginal zone B- and B1-cell-specific protein OS=Homo sapiens OX=9606 GN=MZB1 PE=1 SV=1	98	11	189	0	0	8.57322e+06	4.69874e+06	0	0	3.66347e+06	1.91111e+06	0	0	3.25089e+08	833752198	6.94042e+08	1.37164e+08	395526450	9.80443e+08	3444396681	3.69135e+08	1.23544e+08	7.33971e+07	8.75007	0.0797445	0.830262
P49257	LMAN1	Protein ERGIC-53 OS=Homo sapiens OX=9606 GN=LMAN1 PE=1 SV=2	98	10	510	3.41356e+07	4.50561e+07	3.77494e+07	2.6714e+07	2.43069e+07	4.41554e+07	3.69273e+07	3.41069e+07	5.72539e+07	3.69138e+07	5.7442e+07	137670664	7.25657e+07	4.97473e+07	7.00798e+07	1.26622e+08	2.63977e+08	7.92803e+07	4.28841e+07	5.16765e+07	1.40657	0.0523031	0.835764
P58107	EPPK1	Epiplakin OS=Homo sapiens OX=9606 GN=EPPK1 PE=1 SV=3	98	3	5088	0	1.72368e+06	1.24349e+06	0	0	0	0	0	2.71539e+06	8.97934e+06	0	0	0	3.01827e+06	0	0	0	0	1.44844e+07	0	0.407505	0.829121	0.066491
P13073	COX4I1	Cytochrome c oxidase subunit 4 isoform 1, mitochondrial OS=Homo sapiens OX=9606 GN=COX4I1 PE=1 SV=1	98	8	169	1.71575e+08	1.80066e+08	6.93436e+07	1.26847e+08	1.64181e+08	1.37603e+08	1.68592e+08	1.86929e+08	1.46858e+08	1.54114e+08	4.06414e+07	4.95369e+07	5.53921e+07	1.99272e+07	3.02929e+07	1.0386e+08	3.20802e+07	3.02886e+07	8.67534e+07	1.61805e+08	-1.59477	3.92526e-05	-1.70739
P30046	DDT	D-dopachrome decarboxylase OS=Homo sapiens OX=9606 GN=DDT PE=1 SV=3	98	7	118	1.52656e+08	2.6513e+08	8.4334e+07	1.30704e+08	1.48781e+08	1.40955e+08	1.25109e+08	1.39674e+08	1.30962e+08	218615655	5.04155e+07	4.70278e+07	4.55164e+07	3.07937e+07	3.02033e+07	4.47823e+07	2.18703e+07	3.68197e+07	1.06075e+08	1.24499e+08	-1.74207	0.000215445	-1.50244
P61160	ACTR2	Actin-related protein 2 OS=Homo sapiens OX=9606 GN=ACTR2 PE=1 SV=1	97	8	394	3.21328e+07	2.46793e+07	4.4536e+07	3.47285e+07	2.05815e+07	2.64573e+07	3.86587e+07	3.27311e+07	3.33673e+07	3.26088e+07	7.22231e+07	9.46556e+07	1.351e+08	9.53095e+07	6.3029e+07	2.34114e+08	1.09441e+08	1.2066e+08	8.48241e+07	4.79673e+07	1.80713	0.00466073	1.4662
P62753	RPS6	40S ribosomal protein S6 OS=Homo sapiens OX=9606 GN=RPS6 PE=1 SV=1	97	9	249	30861954	2.85981e+07	5.50176e+07	4.20792e+07	3.52006e+07	2.30878e+07	3.99907e+07	3.95742e+07	3.07196e+07	3.13462e+07	8.62597e+07	9.51179e+07	9.17545e+07	8.14328e+07	9.81389e+07	5.53088e+07	1.20183e+08	8.79951e+07	6.08067e+07	4.11847e+07	1.27611	2.37256e-05	1.88657
Q9H4A4	RNPEP	Aminopeptidase B OS=Homo sapiens OX=9606 GN=RNPEP PE=1 SV=2	97	12	650	5.87693e+07	6.11494e+07	7.60873e+07	5.85004e+07	7.33453e+07	6.31482e+07	5.44443e+07	5.39528e+07	5.49216e+07	4.34853e+07	4.85635e+07	6.35201e+07	6.43664e+07	5.61336e+07	1.39088e+08	1.2661e+08	1.12843e+08	5.07511e+07	6.79936e+07	4.60272e+07	0.439968	0.163775	0.506949
P09417	QDPR	Dihydropteridine reductase OS=Homo sapiens OX=9606 GN=QDPR PE=1 SV=2	97	11	244	1.08799e+08	1.35621e+08	3.27698e+07	7.23507e+07	7.84693e+07	1.14959e+08	1.21946e+08	5.97494e+07	9.16697e+07	1.16958e+08	1.6944e+07	1.29733e+07	0	8.70633e+06	5.40121e+06	4.86247e+06	5.01602e+06	4.34858e+06	4.81103e+07	8.25033e+07	-2.98134	8.60146e-05	-1.84274
P13611	VCAN	Versican core protein OS=Homo sapiens OX=9606 GN=VCAN PE=1 SV=3	96	18	3396	1.01158e+07	2.29993e+06	7.02058e+07	2.92531e+07	7.17907e+06	1.3684e+06	7.41028e+06	1.73076e+07	8.51575e+06	4.4452e+07	2.33354e+08	1.39627e+08	3.20315e+07	6.70725e+08	5.67439e+08	1.25084e+08	1.41955e+08	4.93395e+08	2.03303e+07	1.69677e+07	3.765	0.031522	0.996306
P01889	HLA-B	HLA class I histocompatibility antigen, B alpha chain OS=Homo sapiens OX=9606 GN=HLA-B PE=1 SV=3	96	3	362	2.06512e+07	1.19074e+07	9.25901e+07	4.67788e+07	2.71372e+07	1.91741e+07	3.6604e+07	3.03236e+07	3.79249e+07	1.97397e+07	6.51593e+07	1.24227e+08	1.556e+08	1.68782e+08	1.51111e+08	3.73219e+08	2.9712e+08	5.90042e+07	5.24797e+07	5.83234e+07	2.2292	0.0194102	1.00873
Q6NZI2	CAVIN1	Caveolae-associated protein 1 OS=Homo sapiens OX=9606 GN=CAVIN1 PE=1 SV=1	96	10	390	1.40364e+07	1.62126e+06	3.74989e+07	5.25419e+07	1.36427e+07	0	6.58696e+06	2.92689e+07	3.3135e+07	7.25303e+07	2.428e+08	7.81138e+07	1.22614e+07	9.52219e+07	0	0	4.46141e+07	7.80188e+07	5.20229e+06	2.93851e+07	1.2444	0.284924	0.374383
P61626	LYZ	Lysozyme C OS=Homo sapiens OX=9606 GN=LYZ PE=1 SV=1	96	6	148	1.81941e+08	5.35738e+08	1.01525e+08	2.47657e+08	2.2081e+08	1.12956e+08	2.1264e+08	3.91613e+07	7.63118e+07	69064341	5.68162e+07	1.23995e+08	4.81981e+08	2.41023e+08	3.21349e+08	6.8241e+08	4.05245e+08	9.88905e+07	9.08484e+07	1.27938e+08	0.62917	0.322882	0.290689
Q9HC38	GLOD4	Glyoxalase domain-containing protein 4 OS=Homo sapiens OX=9606 GN=GLOD4 PE=1 SV=1	96	11	313	6.21111e+07	9.27612e+07	7.48164e+07	5.60801e+07	6.37253e+07	6.11335e+07	5.39614e+07	5.80314e+07	6.62752e+07	6.6594e+07	3.64984e+07	5.06167e+07	6.79899e+07	4.79995e+07	1.40731e+07	8.10655e+06	3.01534e+07	4.45915e+07	4.19762e+07	6.47933e+07	-0.786551	0.00343513	-0.97812
O75489	NDUFS3	NADH dehydrogenase [ubiquinone] iron-sulfur protein 3, mitochondrial OS=Homo sapiens OX=9606 GN=NDUFS3 PE=1 SV=1	96	5	264	9.9703e+07	114612112	9.22096e+07	116510333	1.46209e+08	1.62157e+08	9.91212e+07	1.21347e+08	1.00615e+08	9.8099e+07	2.34993e+07	3.40283e+07	4.1669e+07	2.39808e+07	1.97902e+07	4.12856e+07	2.60298e+07	2.44837e+07	4.70285e+07	1.13867e+08	-1.87764	1.52756e-06	-2.69314
O60656	UGT1A9	UDP-glucuronosyltransferase 1-9 OS=Homo sapiens OX=9606 GN=UGT1A9 PE=1 SV=1	96	6	530	2.50087e+08	2.09244e+08	5.45032e+07	2.2212e+08	5.6876e+07	1.26501e+08	2.03159e+08	7.41047e+07	8.96005e+07	1.96364e+08	0	0	0	0	2.03209e+07	0	0	0	1.24077e+08	1.34477e+08	-3.20797	0.00121098	-1.19725
P09429	HMGB1	High mobility group protein B1 OS=Homo sapiens OX=9606 GN=HMGB1 PE=1 SV=3	95	6	215	5.64793e+07	5.5424e+07	1.04594e+08	5.32206e+07	2.96481e+07	3.40466e+07	7.15097e+07	5.68027e+07	6.09438e+07	4.591e+07	2.04707e+08	1.701e+08	1.92225e+08	161262083	77663342	4.52468e+07	1.1336e+08	1.56532e+08	8.28033e+07	6.01693e+07	1.23429	0.0083742	1.06063
P62140	PPP1CB	Serine/threonine-protein phosphatase PP1-beta catalytic subunit OS=Homo sapiens OX=9606 GN=PPP1CB PE=1 SV=3	95	4	327	2.97728e+07	2.48638e+07	4.85761e+07	3.25034e+07	3.65001e+07	3.12928e+07	3.64074e+07	3.60174e+07	2.91331e+07	2.92042e+07	5.07617e+07	5.21888e+07	6.88512e+07	5.59832e+07	6.04393e+07	7.3618e+07	3.53317e+07	5.29251e+07	3.99568e+07	3.70099e+07	0.70393	0.000943907	1.18235
P15531	NME1	Nucleoside diphosphate kinase A OS=Homo sapiens OX=9606 GN=NME1 PE=1 SV=1	95	1	152	7.09715e+06	5.5146e+06	0	4.73486e+06	3.96441e+06	2.9303e+06	6.66867e+06	1.52505e+06	5.4175e+06	8.32273e+06	0	6.57324e+06	3.21151e+06	0	0	5.14133e+06	6.49615e+06	8.42669e+06	7.28234e+06	7.70042e+06	-0.162483	0.773444	-0.0869268
P13861	PRKAR2A	cAMP-dependent protein kinase type II-alpha regulatory subunit OS=Homo sapiens OX=9606 GN=PRKAR2A PE=1 SV=2	95	8	404	5.84288e+07	6.9238e+07	7.18858e+07	5.97736e+07	5.85325e+07	7.29113e+07	5.66499e+07	6.517e+07	6.07657e+07	6.41646e+07	7.95648e+07	7.84608e+07	5.04755e+07	7.52819e+07	3.34563e+07	3.20872e+07	3.66749e+07	4.42267e+07	6.62276e+07	6.8232e+07	-0.208803	0.313581	-0.353347
P04424	ASL	Argininosuccinate lyase OS=Homo sapiens OX=9606 GN=ASL PE=1 SV=4	95	15	464	7.50053e+07	9.45609e+07	3.58506e+07	5.86213e+07	7.61453e+07	1.24173e+08	8.53369e+07	6.8597e+07	7.7968e+07	9.78159e+07	9.32467e+06	1.21775e+07	9.43117e+06	1.13836e+07	1.62142e+08	3.34431e+07	3.30062e+07	1.02933e+07	3.70577e+07	8.74123e+07	-1.16707	0.0420087	-0.641016
Q99536	VAT1	Synaptic vesicle membrane protein VAT-1 homolog OS=Homo sapiens OX=9606 GN=VAT1 PE=1 SV=2	95	11	393	3.76732e+08	4.41246e+08	1.56811e+08	3.1008e+08	1.99258e+08	4.54888e+08	3.35022e+08	1.56751e+08	2.55329e+08	3.73925e+08	1.02426e+08	5.87646e+07	6.48409e+07	4.19282e+07	5.00455e+07	1.5535e+08	1.42623e+08	4.6022e+07	1.48452e+08	2.93886e+08	-1.76475	0.0005532	-1.44543
P47985	UQCRFS1	Cytochrome b-c1 complex subunit Rieske, mitochondrial OS=Homo sapiens OX=9606 GN=UQCRFS1 PE=1 SV=2	95	11	274	1.34827e+08	1.41551e+08	7.75994e+07	1.51115e+08	2.26866e+08	1.55111e+08	1.68388e+08	2.00056e+08	1.26547e+08	1.317e+08	3.35906e+07	3.56905e+07	4.08247e+07	8.75633e+06	1.62156e+07	4.35616e+07	5.00899e+07	2.30633e+07	6.87402e+07	1.37501e+08	-2.08759	1.67441e-05	-2.06152
Q96RQ3	MCCC1	Methylcrotonoyl-CoA carboxylase subunit alpha, mitochondrial OS=Homo sapiens OX=9606 GN=MCCC1 PE=1 SV=3	95	19	725	9.68184e+07	9.92274e+07	1.66266e+07	6.80157e+07	8.05674e+07	1.0247e+08	7.93702e+07	1.26324e+08	9.68531e+07	1.14879e+08	0	7.3185e+06	0	0	2.20002e+07	3.74141e+06	2.18843e+06	0	2.04707e+07	1.01006e+08	-3.83114	8.29699e-05	-2.20288
O00151	PDLIM1	PDZ and LIM domain protein 1 OS=Homo sapiens OX=9606 GN=PDLIM1 PE=1 SV=4	94	8	329	2.56462e+07	1.88865e+07	7.51186e+07	4.00556e+07	3.78163e+07	1.78314e+07	2.8482e+07	3.63366e+07	3.53115e+07	5.26427e+07	1.09655e+08	1.19507e+08	9.02032e+07	7.00835e+07	1.12013e+08	2.95939e+07	4.78597e+07	8.54353e+07	5.08462e+07	3.86609e+07	1.11014	0.0100143	0.923599
O75396	SEC22B	Vesicle-trafficking protein SEC22b OS=Homo sapiens OX=9606 GN=SEC22B PE=1 SV=4	94	7	215	3.67793e+07	3.32264e+07	5.28546e+07	4.43001e+07	4.13315e+07	3.13242e+07	2.65081e+07	3.73954e+07	3.05165e+07	3.83126e+07	4.90842e+07	7.47985e+07	1.03837e+08	5.07714e+07	3.43868e+07	8.1392e+07	1.65479e+08	5.11459e+07	6.48949e+07	4.56932e+07	1.01115	0.042379	0.846243
Q13561	DCTN2	Dynactin subunit 2 OS=Homo sapiens OX=9606 GN=DCTN2 PE=1 SV=4	94	11	401	45375587	3.78927e+07	4.78523e+07	4.20288e+07	2.42359e+07	3.23784e+07	4.01901e+07	3.54826e+07	3.85757e+07	3.76678e+07	5.40826e+07	4.9467e+07	3.4106e+07	3.6357e+07	5.37867e+07	3.82644e+07	5.53696e+07	3.12663e+07	5.25011e+07	4.24834e+07	0.238276	0.150787	0.439957
P07108	DBI	Acyl-CoA-binding protein OS=Homo sapiens OX=9606 GN=DBI PE=1 SV=2	94	6	87	1.47848e+08	2.11516e+08	8.41155e+07	1.01441e+08	7.48643e+07	7.40597e+07	8.7426e+07	4.59761e+07	9.10342e+07	1.00355e+08	1.03087e+08	5.28732e+07	1.07606e+08	3.25099e+07	1.24999e+07	2.92987e+07	5.35946e+07	5.43125e+07	2.09706e+08	8.32368e+07	-0.483995	0.324946	-0.287595
O60716	CTNND1	Catenin delta-1 OS=Homo sapiens OX=9606 GN=CTNND1 PE=1 SV=1	94	14	968	3.92684e+07	3.26706e+07	4.92437e+07	6.18226e+07	7.1838e+07	85638283	5.67814e+07	4.64023e+07	5.73159e+07	3.73811e+07	3.47272e+07	3.47258e+07	3.38356e+07	3.94821e+07	4.94118e+07	1.47843e+07	2.74345e+07	2.90057e+07	4.25751e+07	36924044	-0.663127	0.0144939	-0.797154
P26440	IVD	Isovaleryl-CoA dehydrogenase, mitochondrial OS=Homo sapiens OX=9606 GN=IVD PE=1 SV=2	94	11	426	1.04288e+08	1.29402e+08	3.86021e+07	9.44801e+07	8.2473e+07	1.4816e+08	9.65131e+07	8.55688e+07	8.94061e+07	9.66061e+07	6.15768e+06	1.15655e+07	0	2.00653e+06	0	2.07379e+06	8.97398e+06	6.05601e+06	3.67047e+07	9.51024e+07	-3.56271	7.04028e-06	-2.31252
P59998	ARPC4	Actin-related protein 2/3 complex subunit 4 OS=Homo sapiens OX=9606 GN=ARPC4 PE=1 SV=3	93	6	168	6.07958e+07	5.61592e+07	1.14512e+08	9.16023e+07	7.89171e+07	9.42614e+07	5.8935e+07	6.96034e+07	53879752	5.69223e+07	103657854	1.536e+08	2.19913e+08	1.47946e+08	5.7924e+08	6.91876e+08	3.28193e+08	1.59034e+08	1.00123e+08	7.6017e+07	1.90746	0.0453485	0.903277
P39019	RPS19	40S ribosomal protein S19 OS=Homo sapiens OX=9606 GN=RPS19 PE=1 SV=2	93	7	145	3.32479e+07	3.53547e+07	6.78413e+07	4.75888e+07	5.72336e+07	3.09828e+07	3.20263e+07	3.49141e+07	2.90666e+07	2.96732e+07	7.80713e+07	8.57393e+07	1.53389e+08	7.61444e+07	1.23466e+08	1.06805e+08	1.56447e+08	8.36243e+07	6.22802e+07	4.02882e+07	1.37045	0.00167337	1.3984
P07203	GPX1	Glutathione peroxidase 1 OS=Homo sapiens OX=9606 GN=GPX1 PE=1 SV=4	93	8	203	2.62151e+07	4.49103e+07	4.99414e+07	2.25541e+07	2.55937e+07	2.86815e+07	2.95816e+07	2.60546e+07	2.80195e+07	3.36626e+07	3.84289e+07	4.12519e+07	4.37696e+07	3.96922e+07	3.64159e+07	1.37366e+08	9.49696e+07	3.94213e+07	5.08328e+07	3.12247e+07	0.88013	0.0907495	0.640452
P51858	HDGF	Hepatoma-derived growth factor OS=Homo sapiens OX=9606 GN=HDGF PE=1 SV=1	93	10	240	5.23079e+07	6.71092e+07	8.31141e+07	4.18624e+07	4.4389e+07	3.54291e+07	3.281e+07	4.06683e+07	5.2185e+07	3.80985e+07	1.08591e+08	8.49387e+07	1.3264e+08	7.31269e+07	9.36236e+06	3.2143e+07	5.04616e+07	8.54169e+07	8.38385e+07	6.07455e+07	0.5888	0.14876	0.486174
Q14980	NUMA1	Nuclear mitotic apparatus protein 1 OS=Homo sapiens OX=9606 GN=NUMA1 PE=1 SV=2	93	22	2115	1.43392e+07	2.26596e+07	5.35477e+07	2.15416e+07	1.97918e+07	1.30178e+07	2.07912e+07	2.25405e+07	2.28748e+07	1.97484e+07	2.91611e+07	4.63993e+07	3.0442e+07	7.14069e+07	3.10078e+07	8.3648e+06	2.48648e+07	3.68797e+07	2.09835e+07	2.6377e+07	0.527634	0.208464	0.372523
P10768	ESD	S-formylglutathione hydrolase OS=Homo sapiens OX=9606 GN=ESD PE=1 SV=2	93	6	282	5.79598e+07	5.35967e+07	5.24086e+07	5.02538e+07	4.62418e+07	4.68066e+07	7.32389e+07	6.36278e+07	5.54718e+07	6.14073e+07	6.52835e+07	4.97524e+07	3.79114e+07	5.79112e+07	1.79623e+07	2.49545e+07	1.50678e+07	5.61456e+07	5.67552e+07	5.4262e+07	-0.403427	0.115912	-0.531072
P19404	NDUFV2	NADH dehydrogenase [ubiquinone] flavoprotein 2, mitochondrial OS=Homo sapiens OX=9606 GN=NDUFV2 PE=1 SV=2	93	9	249	8.31942e+07	1.11528e+08	5.60479e+07	7.78803e+07	1.0746e+08	100652953	8.72097e+07	1.14834e+08	1.07352e+08	1.06645e+08	2.06641e+07	1.83227e+07	2.95142e+07	6.57383e+06	1.30547e+07	8.12268e+06	8.78724e+06	1.00809e+07	3.85245e+07	1.03561e+08	-2.48058	9.417e-07	-2.78865
P30050	RPL12	60S ribosomal protein L12 OS=Homo sapiens OX=9606 GN=RPL12 PE=1 SV=1	92	6	165	2.61188e+07	1.96309e+07	4.93348e+07	3.06441e+07	34946433	3.49793e+07	2.97363e+07	2.60161e+07	2.63806e+07	2.40407e+07	4.86356e+07	6.69329e+07	7.79971e+07	5.56124e+07	8.28238e+07	8.17172e+07	9.07214e+07	6.2649e+07	4.96348e+07	3.28923e+07	1.1829	0.000217298	1.71115
P26373	RPL13	60S ribosomal protein L13 OS=Homo sapiens OX=9606 GN=RPL13 PE=1 SV=4	92	7	211	5.75555e+07	6.68638e+07	8.61511e+07	6.17709e+07	4.67526e+07	6.73147e+07	6.14485e+07	6.44872e+07	5.34772e+07	5.46783e+07	1.0769e+08	1.58432e+08	1.31836e+08	1.38239e+08	1.87142e+08	1.6322e+08	1.66709e+08	1.28362e+08	8.10152e+07	7.98797e+07	1.17695	0.000394133	1.91266
O75368	SH3BGRL	SH3 domain-binding glutamic acid-rich-like protein OS=Homo sapiens OX=9606 GN=SH3BGRL PE=1 SV=1	92	7	114	3.04291e+07	4.82771e+07	5.67975e+07	2.73494e+07	4.81048e+07	2.28052e+07	3.54072e+07	3.14216e+07	2.399e+07	4.62197e+07	1.21924e+08	8.49354e+07	1.39477e+08	7.07766e+07	5.54929e+07	5.0819e+07	7.86775e+07	5.6529e+07	5.36424e+07	4.80375e+07	1.09379	0.0101418	1.01952
P04217	A1BG	Alpha-1B-glycoprotein OS=Homo sapiens OX=9606 GN=A1BG PE=1 SV=4	92	11	495	6.44491e+07	1.89856e+07	8.12142e+07	5.3343e+06	119907608	4.96357e+07	6.08946e+07	4.55657e+07	2.62662e+08	6.2022e+07	1.35385e+08	7.45549e+07	4.76871e+07	1.63352e+08	1.41055e+08	1.69752e+08	9.43958e+07	1.2206e+08	3.06987e+07	3.93182e+07	0.497109	0.360474	0.274145
Q9UF12	PRODH2	Hydroxyproline dehydrogenase OS=Homo sapiens OX=9606 GN=PRODH2 PE=1 SV=1	92	13	536	1.28611e+08	1.58454e+08	2.35283e+07	8.43522e+07	2.9711e+07	1.25273e+08	1.40345e+08	2.61021e+07	8.93877e+07	1.26788e+08	2.67758e+06	1.07477e+07	1.13088e+07	2.37542e+06	0	6.87587e+06	0	1.51326e+06	1.90393e+07	9.2096e+07	-3.94385	0.00165026	-1.60079
Q8IUE6	H2AC21	Histone H2A type 2-B OS=Homo sapiens OX=9606 GN=HIST2H2AB PE=1 SV=3	91	2	130	3.06662e+06	2.75796e+06	0	5.08641e+06	6.30912e+06	4.49769e+06	1.0533e+07	3.55869e+06	4.92253e+06	7.78792e+06	2.74365e+07	1.46679e+07	2.83188e+07	4.35733e+07	1.38786e+07	1.8637e+07	9.04533e+06	7.43041e+06	1.52088e+07	8.64747e+06	2.02882	0.01094	1.10311
P19827	ITIH1	Inter-alpha-trypsin inhibitor heavy chain H1 OS=Homo sapiens OX=9606 GN=ITIH1 PE=1 SV=3	91	11	911	1.64772e+07	1.2283e+06	3.31392e+07	3.0893e+06	2.68688e+07	1.72906e+07	25786504	2.96955e+07	8.49151e+07	2.94787e+07	7.265e+07	2.35627e+07	2.21911e+07	1.03248e+08	1.36603e+08	8.11273e+07	4.56205e+07	1.18528e+08	8.63678e+06	1.6414e+07	1.34386	0.059099	0.632104
Q07955	SRSF1	Serine/arginine-rich splicing factor 1 OS=Homo sapiens OX=9606 GN=SRSF1 PE=1 SV=2	91	10	248	4.13084e+07	3.41931e+07	1.0279e+08	4.70972e+07	4.82671e+07	3.14143e+07	4.45128e+07	5.55513e+07	3.96883e+07	3.99869e+07	1.16878e+08	1.13107e+08	1.54092e+08	1.25192e+08	1.32179e+08	4.8685e+07	7.92816e+07	114220449	7.50194e+07	5.14295e+07	1.1356	0.000983384	1.1582
P21291	CSRP1	Cysteine and glycine-rich protein 1 OS=Homo sapiens OX=9606 GN=CSRP1 PE=1 SV=3	91	7	193	5.46482e+07	3.61274e+07	7.82308e+07	6.55693e+07	4.5176e+07	4.02109e+07	7.30935e+07	8.43337e+07	8.06143e+07	1.53854e+08	3.26557e+08	1.92212e+08	5.34124e+07	1.07739e+08	4.42095e+07	6.0188e+07	6.06297e+07	1.7824e+08	3.44228e+07	6.36732e+07	0.723149	0.275431	0.373602
P25786	PSMA1	Proteasome subunit alpha type-1 OS=Homo sapiens OX=9606 GN=PSMA1 PE=1 SV=1	91	11	263	5.39267e+07	4.32736e+07	4.7514e+07	3.87805e+07	3.98995e+07	4.49774e+07	5.41359e+07	3.98594e+07	4.82424e+07	4.57859e+07	3.8827e+07	9.20473e+07	6.63062e+07	7.40594e+07	6.29482e+07	8.40805e+07	8.20347e+07	7.28426e+07	7.6609e+07	4.91513e+07	0.661615	0.000520497	1.34866
Q96QK1	VPS35	Vacuolar protein sorting-associated protein 35 OS=Homo sapiens OX=9606 GN=VPS35 PE=1 SV=2	91	9	796	3.52289e+07	3.08114e+07	3.19971e+07	4.0965e+07	3.12006e+07	4.07425e+07	4.5587e+07	3.28757e+07	2.74987e+07	2.95939e+07	2.69183e+07	3.62432e+07	3.75207e+07	2.58948e+07	4.34705e+07	7.12222e+07	3.59319e+07	3.72137e+07	4.84018e+07	3.70776e+07	0.218387	0.316376	0.308479
P42126	ECI1	Enoyl-CoA delta isomerase 1, mitochondrial OS=Homo sapiens OX=9606 GN=ECI1 PE=1 SV=1	91	7	302	1.8519e+08	1.58081e+08	8.23854e+07	1.22758e+08	1.52191e+08	1.72739e+08	1.3652e+08	1.77679e+08	164321141	1.67225e+08	3.48607e+07	4.14441e+07	2.66298e+07	2.66722e+07	0	6.94028e+06	2.0182e+07	3.10203e+07	8.32152e+07	1.84297e+08	-2.33503	2.53645e-06	-2.35595
Q9Y646	CPQ	Carboxypeptidase Q OS=Homo sapiens OX=9606 GN=CPQ PE=1 SV=1	91	11	472	1.10576e+08	9.58269e+07	3.03151e+07	3.33406e+07	6.72699e+07	7.02877e+07	4.82687e+07	6.75508e+07	4.73303e+07	9.83795e+07	0	1.16249e+07	6.77834e+06	5.86147e+06	3.05817e+07	4.09409e+06	3.44004e+06	2.54963e+06	9.03574e+06	8.43655e+07	-3.02539	0.00039089	-1.68143
P04080	CSTB	Cystatin-B OS=Homo sapiens OX=9606 GN=CSTB PE=1 SV=2	90	4	98	7.38317e+07	4.05536e+07	7.07012e+07	5.20463e+07	4.93637e+07	2.74934e+07	4.70553e+07	6.41655e+07	7.17168e+07	8.04352e+07	1.04174e+08	1.21084e+08	1.27164e+08	7.48393e+07	8.03918e+07	3.7297e+08	1.74756e+08	9.79243e+07	1.45912e+08	8.63876e+07	1.32209	0.0201677	0.847195
P18124	RPL7	60S ribosomal protein L7 OS=Homo sapiens OX=9606 GN=RPL7 PE=1 SV=1	90	11	248	3.98843e+07	3.12117e+07	8.28604e+07	6.06613e+07	4.77954e+07	5.65633e+07	5.66133e+07	5.56002e+07	4.48909e+07	4.37824e+07	8.90897e+07	1.19585e+08	1.03522e+08	9.16696e+07	1.4252e+08	1.45067e+08	1.82891e+08	1.12855e+08	7.46859e+07	5.18208e+07	1.18243	0.00111697	1.45512
P60953	CDC42	Cell division control protein 42 homolog OS=Homo sapiens OX=9606 GN=CDC42 PE=1 SV=2	90	5	191	2.40063e+07	3.50734e+07	6.28906e+07	4.7037e+07	5.33467e+07	2.62313e+07	4.19348e+07	3.68525e+07	3.27494e+07	3.36342e+07	9.05136e+07	5.9433e+07	1.19573e+08	6.71187e+07	6.67559e+07	1.42953e+08	9.12988e+07	5.83874e+07	6.14424e+07	2.5217e+07	1.0959	0.00535786	1.1263
P26640	VARS1	Valine--tRNA ligase OS=Homo sapiens OX=9606 GN=VARS1 PE=1 SV=4	90	17	1264	4.10027e+07	3.64048e+07	4.38003e+07	6.5105e+07	3.64634e+07	4.05425e+07	3.6005e+07	39227386	2.75938e+07	2.41172e+07	2.62682e+07	5.89178e+07	9.06545e+07	3.78671e+07	7.02559e+07	7.10356e+07	9.91389e+07	4.95808e+07	5.82741e+07	4.71632e+07	0.678111	0.0382674	0.720793
P17655	CAPN2	Calpain-2 catalytic subunit OS=Homo sapiens OX=9606 GN=CAPN2 PE=1 SV=6	90	10	700	4.68391e+07	4.56347e+07	3.99625e+07	3.50235e+07	3.22929e+07	2.67663e+07	4.22492e+07	4.19235e+07	3.89464e+07	3.00611e+07	6.1907e+07	6.46091e+07	3.58921e+07	4.49892e+07	2.15376e+07	1.19535e+07	1.42419e+07	6.14483e+07	5.07443e+07	5.06497e+07	0.104195	0.75685	0.109157
Q969Z3	MTARC2	Mitochondrial amidoxime reducing component 2 OS=Homo sapiens OX=9606 GN=MTARC2 PE=1 SV=1	90	12	335	1.42137e+08	1.40272e+08	5.73898e+07	6.69482e+07	71566517	1.35935e+08	153386958	6.547e+07	107053175	1.18479e+08	0	1.04735e+07	1.14366e+07	3.44736e+06	5.47292e+06	15461917	6.36315e+06	0	2.20675e+07	7.77625e+07	-3.67251	0.000123508	-2.30924
P45880	VDAC2	Voltage-dependent anion-selective channel protein 2 OS=Homo sapiens OX=9606 GN=VDAC2 PE=1 SV=2	88	11	294	8.35358e+07	1.01544e+08	5.81406e+07	8.33189e+07	7.48792e+07	72383056	1.19158e+08	8.53851e+07	8.20182e+07	8.53381e+07	5.60833e+07	4.80996e+07	7.77457e+07	5.27995e+07	4.83957e+07	8.6481e+07	1.18129e+08	4.30927e+07	133708279	9.29505e+07	-0.195801	0.473177	-0.229537
P14854	COX6B1	Cytochrome c oxidase subunit 6B1 OS=Homo sapiens OX=9606 GN=COX6B1 PE=1 SV=2	88	6	86	1.54664e+08	1.74418e+08	6.78538e+07	1.32143e+08	2.57646e+08	1.15177e+08	1.49024e+08	1.84681e+08	1.23895e+08	1.59174e+08	4.54781e+07	4.00275e+07	5.98626e+07	3.30866e+07	3.37667e+07	36177081	5.22379e+07	3.48304e+07	8.41167e+07	1.44114e+08	-1.70378	0.000137309	-1.66596
P62701	RPS4X	40S ribosomal protein S4, X isoform OS=Homo sapiens OX=9606 GN=RPS4X PE=1 SV=2	87	8	263	3.15999e+07	2.85803e+07	5.15453e+07	3.88405e+07	3.36163e+07	3.66631e+07	3.54899e+07	2.95821e+07	3.07031e+07	2.71253e+07	7.34949e+07	8.95315e+07	9.25957e+07	5.38868e+07	8.4764e+07	8.87465e+07	1.22021e+08	7.43688e+07	5.08813e+07	3.64635e+07	1.23913	0.000671862	1.73104
O00571	DDX3X	ATP-dependent RNA helicase DDX3X OS=Homo sapiens OX=9606 GN=DDX3X PE=1 SV=3	87	9	662	1.69946e+07	8.18357e+06	2.64912e+07	2.23657e+07	2.13984e+07	2.12375e+07	1.82931e+07	1.33966e+07	2.31596e+07	1.72053e+07	2.96409e+07	3.06656e+07	3.15031e+07	3.18838e+07	3.1429e+07	4.66652e+07	3.80529e+07	2.64815e+07	3.73674e+07	2.61742e+07	0.83831	0.0002155	1.38896
P14868	DARS1	Aspartate--tRNA ligase, cytoplasmic OS=Homo sapiens OX=9606 GN=DARS1 PE=1 SV=2	87	13	501	4.10382e+07	4.24863e+07	3.63334e+07	3.80066e+07	3.10176e+07	3.49462e+07	3.95498e+07	3.84926e+07	3.35525e+07	2.94293e+07	3.72624e+07	5.08156e+07	4.70338e+07	3.3622e+07	3.80643e+07	5.278e+07	5.45892e+07	2.82238e+07	5.85347e+07	3.58031e+07	0.288024	0.0951144	0.576389
P00740	F9	Coagulation factor IX OS=Homo sapiens OX=9606 GN=F9 PE=1 SV=2	87	10	461	6.73685e+07	2.76128e+07	6.91671e+07	2.66163e+07	5.97601e+07	5.76009e+07	6.12451e+07	105754307	8.51361e+07	3.42916e+07	4.52887e+07	1.2194e+08	9.57013e+07	6.69432e+07	3.169e+07	2.26741e+07	0	87800546	4.77757e+07	5.15177e+07	-0.0418067	0.927023	-0.0280944
P50213	IDH3A	Isocitrate dehydrogenase [NAD] subunit alpha, mitochondrial OS=Homo sapiens OX=9606 GN=IDH3A PE=1 SV=1	87	8	366	5.1777e+07	4.38213e+07	1.91693e+07	5.18394e+07	4.80824e+07	5.34073e+07	4.28975e+07	5.74896e+07	5.29189e+07	5.47343e+07	2.80585e+07	2.75665e+07	2.41619e+07	1.85659e+07	3.27373e+07	2.23561e+07	3.00255e+07	1.60646e+07	3.4989e+07	5.16997e+07	-0.86963	0.000502244	-1.31392
Q9Y3Z3	SAMHD1	Deoxynucleoside triphosphate triphosphohydrolase SAMHD1 OS=Homo sapiens OX=9606 GN=SAMHD1 PE=1 SV=2	86	20	626	7.79385e+06	9.27357e+06	1.94078e+08	2.77528e+07	3.51828e+07	4.88125e+06	6.76919e+06	2.75699e+07	1.16934e+07	5.86965e+06	4.89002e+07	1.56864e+08	2.37637e+08	1.28308e+08	1.4812e+08	1.28169e+08	1.71348e+08	1.54532e+08	6.00668e+07	2.75785e+07	2.05097	0.00352021	0.95983
P19823	ITIH2	Inter-alpha-trypsin inhibitor heavy chain H2 OS=Homo sapiens OX=9606 GN=ITIH2 PE=1 SV=2	86	12	946	2.46118e+07	3.78461e+06	2.71534e+07	0	1.55725e+07	1.01877e+07	3.17732e+07	2.69842e+07	1.04514e+08	3.09686e+07	7.50922e+07	2.29974e+07	1.19514e+07	8.93206e+07	4.24707e+07	8.71101e+07	1.38413e+07	6.97525e+07	1.19735e+07	8.82467e+06	0.775484	0.256193	0.331427
P42224	STAT1	Signal transducer and activator of transcription 1-alpha/beta OS=Homo sapiens OX=9606 GN=STAT1 PE=1 SV=2	85	14	750	1.59872e+06	1.26635e+06	2.45997e+07	2.89392e+07	6.13204e+06	0	4.63925e+06	1.17073e+07	3.2551e+06	1.70557e+06	2.63508e+07	2.95489e+07	6.57323e+07	3.76637e+07	4.39638e+07	9.83852e+07	7.7711e+07	3.87668e+07	8.92662e+07	2.99967e+07	2.74933	0.00199111	1.36323
Q13510	ASAH1	Acid ceramidase OS=Homo sapiens OX=9606 GN=ASAH1 PE=1 SV=5	85	9	395	5.06077e+07	5.18264e+07	4.48312e+07	4.11086e+07	4.47262e+07	3.86607e+07	4.89331e+07	6.02764e+07	3.84198e+07	4.12171e+07	4.00654e+07	4.30344e+07	1.47351e+08	2.64123e+07	5.43183e+07	9.53995e+07	1.44908e+08	4.32806e+07	1.23599e+08	4.46536e+07	0.79319	0.114068	0.647155
P61106	RAB14	Ras-related protein Rab-14 OS=Homo sapiens OX=9606 GN=RAB14 PE=1 SV=4	85	8	215	4.62496e+07	4.37057e+07	5.16643e+07	5.3633e+07	5.03357e+07	5.11365e+07	4.69656e+07	4.84574e+07	4.32604e+07	4.47774e+07	6.02264e+07	4.83682e+07	6.27017e+07	4.72014e+07	5.48505e+07	5.79675e+07	4.93254e+07	4.35278e+07	5.03641e+07	5.37269e+07	0.134919	0.124868	0.493195
P09936	UCHL1	Ubiquitin carboxyl-terminal hydrolase isozyme L1 OS=Homo sapiens OX=9606 GN=UCHL1 PE=1 SV=2	85	7	223	5.21897e+07	6.91294e+07	5.81503e+07	2.22639e+07	4.10221e+07	4.40946e+07	5.71196e+07	7.53632e+07	4.54786e+07	6.21415e+07	3.01572e+07	2.14534e+07	5.62398e+06	6.14913e+06	1.00403e+07	4.13426e+06	2.55589e+06	1.90366e+07	2.65361e+07	4.14601e+07	-1.91584	8.553e-05	-1.588
P55809	OXCT1	Succinyl-CoA:3-ketoacid coenzyme A transferase 1, mitochondrial OS=Homo sapiens OX=9606 GN=OXCT1 PE=1 SV=1	85	9	520	6.78045e+07	6.19242e+07	2.07225e+07	4.81592e+07	1.76623e+08	2.93646e+07	6.43108e+07	1.61533e+08	1.02714e+08	7.27282e+07	9.23756e+06	1.81839e+06	0	2.94511e+06	0	0	0	3.1417e+06	0	9.78613e+07	-5.4029	0.00339806	-1.50632
P27105	STOM	Erythrocyte band 7 integral membrane protein OS=Homo sapiens OX=9606 GN=STOM PE=1 SV=3	84	7	288	2.50513e+07	2.71428e+07	4.20877e+07	3.68125e+07	3.12743e+07	2.93047e+07	2.45127e+07	4.73265e+07	3.4126e+07	2.73749e+07	6.06542e+07	1.13862e+08	1.66608e+08	8.03792e+07	9.49842e+07	8.17197e+08	1.76946e+08	6.6255e+07	1.11773e+08	2.97157e+07	2.52931	0.136012	0.665648
P07996	THBS1	Thrombospondin-1 OS=Homo sapiens OX=9606 GN=THBS1 PE=1 SV=2	84	14	1170	4.50311e+07	3.29887e+07	4.96034e+07	1.95934e+07	5.05414e+07	1.25374e+07	3.00359e+07	3.20208e+07	2.92692e+07	1.59514e+07	3.00574e+07	4.70799e+07	2.16258e+07	2.8373e+07	2.68424e+07	3.89992e+07	457566225	1.3925e+08	4.75281e+07	4.81237e+07	1.5507	0.301817	0.419778
O60506	SYNCRIP	Heterogeneous nuclear ribonucleoprotein Q OS=Homo sapiens OX=9606 GN=SYNCRIP PE=1 SV=2	84	6	623	1.60046e+07	1.2628e+07	1.57682e+07	1.18973e+07	1.69269e+07	1.07143e+07	8.02417e+06	1.49511e+07	1.51485e+07	1.52858e+07	4.10689e+07	2.16289e+07	3.2157e+07	3.84522e+07	1.5218e+07	2.16255e+07	2.78014e+07	3.46728e+07	3.34833e+07	2.3777e+07	1.10617	0.00173269	1.46535
P07384	CAPN1	Calpain-1 catalytic subunit OS=Homo sapiens OX=9606 GN=CAPN1 PE=1 SV=1	84	13	714	2.64125e+07	3.06137e+07	6.21338e+07	4.08994e+07	4.26191e+07	4.28465e+07	4.73453e+07	5.47917e+07	4.08303e+07	4.1473e+07	1.11052e+08	9.72188e+07	8.88985e+07	9.70048e+07	6.34894e+07	4.6265e+07	6.15718e+07	7.94857e+07	7.17565e+07	6.20246e+07	0.889237	0.00196738	1.24682
Q9NQC3	RTN4	Reticulon-4 OS=Homo sapiens OX=9606 GN=RTN4 PE=1 SV=2	84	8	1192	7.0329e+07	6.07577e+07	1.09479e+08	7.16019e+07	6.57205e+07	4.75544e+07	6.33898e+07	6.09511e+07	5.44663e+07	6.56675e+07	187028249	1.37367e+08	1.02216e+08	1.52416e+08	1.08993e+08	1.30307e+08	102632865	1.14399e+08	7.56294e+07	8.02957e+07	0.881792	0.000827045	1.21192
Q96AE4	FUBP1	Far upstream element-binding protein 1 OS=Homo sapiens OX=9606 GN=FUBP1 PE=1 SV=3	84	7	644	2.91032e+07	2.93186e+07	6.80187e+07	3.85573e+07	3.78117e+07	1.86853e+07	2.88436e+07	2.89682e+07	2.46784e+07	2.06622e+07	4.77138e+07	5.70308e+07	7.67142e+07	6.87538e+07	4.27134e+07	4.28456e+07	5.98617e+07	5.20465e+07	3.44259e+07	2.93267e+07	0.722481	0.0102358	0.811671
O43175	PHGDH	D-3-phosphoglycerate dehydrogenase OS=Homo sapiens OX=9606 GN=PHGDH PE=1 SV=4	84	11	533	4.20255e+08	4.1427e+08	1160379757	4.81614e+08	4.7317e+08	2.65293e+08	5.83618e+08	7.32994e+08	527215991	9.08253e+08	1151977648	7.28595e+08	2.59492e+08	1519357618	8.33991e+08	3.87251e+08	7.16184e+08	1138280039	3.43936e+08	4.6674e+08	0.398541	0.325136	0.290781
P51570	GALK1	Galactokinase OS=Homo sapiens OX=9606 GN=GALK1 PE=1 SV=1	84	9	392	5.47451e+07	8.49476e+07	2.98422e+07	3.87578e+07	5.42748e+07	7.59925e+07	6.07679e+07	4.75702e+07	5.36195e+07	5.86501e+07	1.65336e+07	2.17321e+07	7.70311e+06	9.24722e+06	2.46702e+07	3.64526e+07	3.63317e+07	1.44706e+07	2.80807e+07	5.07584e+07	-1.36616	0.000358478	-1.35135
P10606	COX5B	Cytochrome c oxidase subunit 5B, mitochondrial OS=Homo sapiens OX=9606 GN=COX5B PE=1 SV=2	84	5	129	180038426	1.89616e+08	9.51019e+07	1.38008e+08	2.33291e+08	1.31117e+08	1.59431e+08	1.72772e+08	1.30773e+08	1.41865e+08	3.64838e+07	3.74781e+07	4.13948e+07	1.42157e+07	2.78988e+07	3.53841e+07	5.70111e+07	2.56643e+07	8.42472e+07	1.36684e+08	-1.97543	1.10895e-05	-2.09941
Q9NR12	PDLIM7	PDZ and LIM domain protein 7 OS=Homo sapiens OX=9606 GN=PDLIM7 PE=1 SV=1	83	12	457	1.71744e+07	5.20876e+06	6.48717e+07	2.94423e+07	2.11076e+07	1.22945e+07	1.47564e+07	2.39455e+07	2.58751e+07	8.11507e+07	1.90472e+08	1.12502e+08	1.93879e+07	8.83429e+07	6.16954e+07	5.25317e+07	4.03477e+07	1.26402e+08	1.33249e+07	2.25747e+07	1.40489	0.0681291	0.633196
P05155	SERPING1	Plasma protease C1 inhibitor OS=Homo sapiens OX=9606 GN=SERPING1 PE=1 SV=2	83	9	500	3.79456e+07	4.72065e+07	6.97138e+07	9.86037e+06	8.91554e+07	3.26819e+07	4.54017e+07	8.46597e+07	1.54873e+08	4.8472e+07	1.27902e+08	1.27385e+08	2.11115e+08	1.68073e+08	2.24786e+08	1.33277e+08	7.04247e+07	1.91686e+08	1.12292e+08	3.90381e+07	1.29268	0.00190329	1.04476
Q13263	TRIM28	Transcription intermediary factor 1-beta OS=Homo sapiens OX=9606 GN=TRIM28 PE=1 SV=5	83	13	835	2.34058e+07	1.96804e+07	8.03483e+07	3.24817e+07	3.35187e+07	1.78106e+07	1.81343e+07	2.66673e+07	2.325e+07	1.66589e+07	1.01799e+08	7.08414e+07	9.40361e+07	8.39142e+07	5.2976e+07	1.79665e+07	5.18482e+07	7.00489e+07	4.77748e+07	2.9957e+07	1.16991	0.00740513	0.858167
Q12905	ILF2	Interleukin enhancer-binding factor 2 OS=Homo sapiens OX=9606 GN=ILF2 PE=1 SV=2	83	8	390	2.6914e+07	2.45099e+07	6.02819e+07	2.62168e+07	3.0487e+07	2.38016e+07	2.57047e+07	3.00339e+07	2.483e+07	2.2637e+07	5.67099e+07	5.7328e+07	7.30282e+07	6.79509e+07	6.96612e+07	3.90307e+07	4.19e+07	6.06183e+07	4.07725e+07	32718702	0.931236	0.000803677	1.17421
Q15417	CNN3	Calponin-3 OS=Homo sapiens OX=9606 GN=CNN3 PE=1 SV=1	83	6	329	4.31345e+07	3.04954e+07	5.14531e+07	5.00845e+07	3.93022e+07	2.19743e+07	4.20438e+07	3.84451e+07	4.69059e+07	5.37736e+07	1.03063e+08	8.26723e+07	2.88028e+07	7.9289e+07	3.94028e+07	1.48648e+07	9.0087e+07	8.55516e+07	6.92936e+07	5.00473e+07	0.657935	0.0828516	0.631419
P51572	BCAP31	B-cell receptor-associated protein 31 OS=Homo sapiens OX=9606 GN=BCAP31 PE=1 SV=3	83	8	246	4.47268e+07	5.25749e+07	2.90186e+07	3.8115e+07	4.21289e+07	3.13829e+07	3.36252e+07	3.35787e+07	3.46048e+07	3.1855e+07	5.72265e+07	4.535e+07	6.10684e+07	3.58226e+07	3.51648e+07	5.67488e+07	8.49061e+07	3.44409e+07	6.21796e+07	3.50819e+07	0.499769	0.0509414	0.680361
P48643	CCT5	T-complex protein 1 subunit epsilon OS=Homo sapiens OX=9606 GN=CCT5 PE=1 SV=1	83	12	541	4.23992e+07	3.9753e+07	1.49614e+07	4.4098e+07	3.64245e+07	3.36124e+07	2.70482e+07	2.93857e+07	3.5382e+07	3.84715e+07	6.75278e+06	2.05843e+07	4.47551e+07	2.2993e+07	3.4296e+07	4.391e+07	8.92889e+07	2.55541e+07	5.82871e+07	2.67804e+07	0.172493	0.682781	0.138863
P21912	SDHB	Succinate dehydrogenase [ubiquinone] iron-sulfur subunit, mitochondrial OS=Homo sapiens OX=9606 GN=SDHB PE=1 SV=3	83	11	280	1.25682e+08	1.09232e+08	5.89194e+07	1.08158e+08	1.11479e+08	1.16985e+08	139439030	1.20002e+08	9.12057e+07	1.16803e+08	1.59851e+07	1.73284e+07	1.34968e+07	1.13336e+07	2.60081e+07	1.52182e+07	1.83642e+07	1.1146e+07	4.50751e+07	9.88141e+07	-2.50596	8.82888e-07	-2.94587
Q00341	HDLBP	Vigilin OS=Homo sapiens OX=9606 GN=HDLBP PE=1 SV=2	82	17	1268	1.66547e+07	1.53166e+07	3.32264e+07	2.74222e+07	1.47743e+07	2.17798e+06	1.73957e+07	2.02046e+07	1.32995e+07	1.62133e+07	4.05166e+07	7.24534e+07	6.32575e+07	4.32837e+07	5.76569e+07	1.01166e+08	1.442e+08	5.97164e+07	3.38258e+07	2.78879e+07	1.95393	0.00629942	1.24996
P01903	HLA-DRA	HLA class II histocompatibility antigen, DR alpha chain OS=Homo sapiens OX=9606 GN=HLA-DRA PE=1 SV=1	82	7	254	1.73003e+07	2.10438e+07	4.24687e+07	2.80742e+07	2.63003e+07	3.04574e+07	2.37228e+07	2.94813e+07	4.45367e+07	1.94965e+07	6.03966e+07	1.12796e+08	1.14528e+08	1.32661e+08	7.54522e+07	1.0906e+08	1.12691e+08	8.41771e+07	8.84107e+07	5.15006e+07	1.80589	7.09107e-05	2.32922
Q9P2R7	SUCLA2	Succinate--CoA ligase [ADP-forming] subunit beta, mitochondrial OS=Homo sapiens OX=9606 GN=SUCLA2 PE=1 SV=3	82	14	463	8.66069e+07	7.9148e+07	3.59677e+07	7.67174e+07	8.67259e+07	8.33367e+07	9.93428e+07	9.11152e+07	9.63387e+07	9.62308e+07	1.73852e+06	9.69046e+06	1.37417e+06	1.556e+06	0	3.10185e+06	7.71099e+06	1.48384e+06	2.68443e+07	7.42036e+07	-3.80615	8.82888e-07	-3.05732
Q9NZN4	EHD2	EH domain-containing protein 2 OS=Homo sapiens OX=9606 GN=EHD2 PE=1 SV=2	81	17	543	1.63783e+07	8.55467e+06	4.86277e+07	3.83849e+07	1.68215e+07	6.29484e+06	2.22481e+07	4.43858e+07	4.24565e+07	8.18823e+07	2.68396e+08	9.7241e+07	2.81186e+07	1.04038e+08	7.62365e+06	1.65072e+07	2.57635e+07	7.82956e+07	1.44699e+07	2.79075e+07	1.12607	0.278752	0.385241
P43243	MATR3	Matrin-3 OS=Homo sapiens OX=9606 GN=MATR3 PE=1 SV=2	81	10	847	3.17197e+07	3.08041e+07	8.3657e+07	5.12454e+07	5.41377e+07	3.90342e+07	3.34434e+07	3.63956e+07	3.59257e+07	2.50461e+07	7.3523e+07	5.91577e+07	8.21679e+07	6.81261e+07	3.16018e+08	3.53759e+07	7.38668e+07	6.46433e+07	4.42563e+07	3.85943e+07	1.10736	0.146266	0.501147
Q9H0U4	RAB1B	Ras-related protein Rab-1B OS=Homo sapiens OX=9606 GN=RAB1B PE=1 SV=1	81	3	201	9.04106e+06	1.15142e+07	1.27207e+07	1.15786e+07	4.1061e+06	0	1.45806e+07	1.34949e+07	1.11969e+07	1.34985e+07	9.92564e+06	7.57576e+06	3.596e+06	0	0	2.47546e+06	3.94838e+06	1.15582e+07	1.72284e+07	1.07176e+07	-0.701354	0.176746	-0.396706
Q9BRA2	TXNDC17	Thioredoxin domain-containing protein 17 OS=Homo sapiens OX=9606 GN=TXNDC17 PE=1 SV=1	81	4	123	6.03489e+07	7.00695e+07	4.18407e+07	4.81531e+07	4.58321e+07	6.35936e+07	5.71828e+07	5.37407e+07	4.42632e+07	6.01192e+07	2.13272e+07	2.75778e+07	2.4493e+07	2.45567e+07	3.0789e+07	4.61232e+07	2.07864e+07	2.73633e+07	5.39266e+07	4.77679e+07	-0.825044	0.000660617	-1.2063
O75746	SLC25A12	Calcium-binding mitochondrial carrier protein Aralar1 OS=Homo sapiens OX=9606 GN=SLC25A12 PE=1 SV=2	81	5	678	1.37364e+07	6.1729e+06	5.46101e+06	8.83106e+06	1.61915e+07	8.88561e+06	1.35997e+07	1.69501e+07	1.32926e+07	1.23235e+07	7.1013e+06	6.63962e+06	8.84397e+06	0	0	0	0	3.12772e+06	7.01192e+06	1.64311e+07	-1.66675	0.00152916	-1.07881
O43451	MGAM	Maltase-glucoamylase, intestinal OS=Homo sapiens OX=9606 GN=MGAM PE=1 SV=5	81	19	1857	4.21851e+07	1.7457e+08	4.92636e+06	1.96571e+07	4.94698e+07	3.97773e+07	1.81974e+07	4.43191e+07	5.54848e+07	1.17755e+08	0	0	0	0	0	0	0	0	1.29526e+06	6.72053e+07	-8.62029	0.016705	-1.14692
O60664	PLIN3	Perilipin-3 OS=Homo sapiens OX=9606 GN=PLIN3 PE=1 SV=3	80	12	434	1.70357e+07	1.26609e+07	1.23711e+08	2.36285e+07	2.30238e+07	0	1.81217e+07	1.33807e+07	3.21284e+07	1.51788e+07	7.22497e+07	6.67899e+07	9.34229e+07	1.02336e+08	6.16806e+07	7.2474e+07	1.08349e+08	104202848	5.42223e+07	2.4799e+07	1.55158	0.00291087	1.03258
P52597	HNRNPF	Heterogeneous nuclear ribonucleoprotein F OS=Homo sapiens OX=9606 GN=HNRNPF PE=1 SV=3	80	9	415	4.32807e+07	3.54472e+07	8.11479e+07	4.30198e+07	2.82627e+07	3.21567e+07	3.55379e+07	4.01056e+07	4.29405e+07	3.91942e+07	8.26465e+07	8.01148e+07	1.10696e+08	1.05195e+08	9.42852e+07	5.29585e+07	6.58961e+07	8.9813e+07	7.87967e+07	5.04666e+07	1.00463	0.000243122	1.36895
P20618	PSMB1	Proteasome subunit beta type-1 OS=Homo sapiens OX=9606 GN=PSMB1 PE=1 SV=2	80	6	241	3.10349e+07	3.90384e+07	2.8537e+07	3.00418e+07	2.71183e+07	2.74012e+07	3.58759e+07	3.54085e+07	3.19824e+07	3.06392e+07	2.25179e+07	4.12683e+07	4.11903e+07	5.52675e+07	2.31529e+07	2.84911e+07	7.20935e+07	3.93866e+07	5.37009e+07	3.65377e+07	0.401996	0.153775	0.531757
P04196	HRG	Histidine-rich glycoprotein OS=Homo sapiens OX=9606 GN=HRG PE=1 SV=1	80	9	525	4.70929e+07	1.26887e+07	7.03697e+07	2.32276e+06	2.52597e+07	2.74418e+07	6.01812e+07	5.30071e+07	7.54444e+07	6.97307e+07	1.02263e+08	6.57492e+07	1.94785e+07	1.37359e+08	1.69493e+07	6.12173e+07	2.43802e+07	7.02737e+07	4.39124e+06	1.74624e+07	0.330803	0.569127	0.172617
Q96FW1	OTUB1	Ubiquitin thioesterase OTUB1 OS=Homo sapiens OX=9606 GN=OTUB1 PE=1 SV=2	80	8	271	2.86714e+07	2.40824e+07	3.73125e+07	2.01647e+07	3.32219e+07	1.68301e+07	3.72307e+07	2.67666e+07	2.47855e+07	1.62599e+07	2.79808e+07	2.79342e+07	1.97325e+07	3.03425e+07	2.47819e+07	2.44817e+07	2.09137e+07	2.72063e+07	3.49444e+07	2.59096e+07	-0.00287275	0.987326	-0.00451768
P22830	FECH	Ferrochelatase, mitochondrial OS=Homo sapiens OX=9606 GN=FECH PE=1 SV=2	80	14	423	5.9607e+07	6.80137e+07	1.58566e+07	4.17825e+07	9.91437e+07	5.06332e+07	5.46735e+07	139776839	9.89514e+07	7.1136e+07	1.02744e+07	4.97037e+06	0	3.61864e+06	0	3.26879e+07	1.63791e+07	9.20018e+06	8.44309e+06	1.22658e+08	-2.87924	0.00134707	-1.41446
Q6YN16	HSDL2	Hydroxysteroid dehydrogenase-like protein 2 OS=Homo sapiens OX=9606 GN=HSDL2 PE=1 SV=1	80	16	418	1.18519e+08	8.15742e+07	2.2197e+07	8.33504e+07	8.08483e+07	1.38228e+08	8.13289e+07	102032351	6.55391e+07	8.8637e+07	0	4.5786e+06	3.43405e+06	2.66934e+06	6.80028e+06	0	0	2.29334e+06	6.93819e+07	6.75354e+07	-3.12168	0.000122968	-1.51163
P01619	IGKV3-20	Immunoglobulin kappa variable 3-20 OS=Homo sapiens OX=9606 GN=IGKV3-20 PE=1 SV=2	79	2	116	6.72511e+07	2.80261e+07	9.98546e+07	1.67318e+07	6.81563e+07	5.27431e+07	7.40623e+07	8.15532e+07	3.45929e+08	1.07513e+08	2.02611e+08	5.33566e+08	3.41825e+08	363115155	4.03593e+08	1517990612	5.90328e+08	4.0374e+08	5.48012e+08	1.08243e+08	2.53267	0.00634755	1.00114
P01911	HLA-DRB1	HLA class II histocompatibility antigen, DRB1 beta chain OS=Homo sapiens OX=9606 GN=HLA-DRB1 PE=1 SV=2	79	4	266	1.89293e+07	1.78666e+07	3.157e+07	4.16222e+07	2.00007e+07	3.44534e+07	3.03433e+07	1.96157e+07	4.88008e+07	1.73565e+07	5.38948e+07	1.31136e+08	4.70808e+07	9.3601e+07	2.25935e+08	1.06469e+08	150298323	9.41128e+07	8.9741e+07	7.29228e+07	1.97443	0.00539643	1.33209
Q08380	LGALS3BP	Galectin-3-binding protein OS=Homo sapiens OX=9606 GN=LGALS3BP PE=1 SV=1	79	11	585	2.71581e+07	1.99581e+07	1.64384e+08	1.31321e+07	4.75575e+07	7.58371e+06	2.05534e+07	1.10762e+08	1.22742e+07	6.63441e+06	4.00879e+07	1.62367e+08	6.01221e+08	3.63903e+07	3.02136e+07	4.07676e+07	2.48088e+07	5.95242e+07	7.86505e+07	3.0899e+07	1.47264	0.299476	0.339263
P23381	WARS1	Tryptophan--tRNA ligase, cytoplasmic OS=Homo sapiens OX=9606 GN=WARS1 PE=1 SV=2	79	11	471	1.32306e+07	1.65216e+07	3.49033e+07	3.01796e+07	1.73097e+07	9.9094e+06	1.83464e+07	2.33207e+07	2.59705e+07	1.78698e+07	2.05473e+07	4.28967e+07	7.05064e+07	2.0197e+07	2.38833e+07	1.21309e+08	5.59134e+07	3.82015e+07	6.69676e+07	2.55376e+07	1.30142	0.0453995	0.800369
Q9BR76	CORO1B	Coronin-1B OS=Homo sapiens OX=9606 GN=CORO1B PE=1 SV=1	79	6	489	2.58377e+07	3.33509e+07	4.14278e+07	3.55055e+07	3.08904e+07	4.54692e+07	2.3344e+07	2.78836e+07	3.21688e+07	2.97266e+07	3.53608e+07	3.14518e+07	2.47779e+07	4.01754e+07	7.23934e+07	3.6854e+07	3.70751e+07	3.43218e+07	4.39982e+07	2.76376e+07	0.282413	0.223244	0.368323
O60701	UGDH	UDP-glucose 6-dehydrogenase OS=Homo sapiens OX=9606 GN=UGDH PE=1 SV=1	79	10	494	5.00539e+07	3.89998e+07	3.34633e+07	3.56007e+07	3.69534e+07	1.14778e+08	2.19534e+07	4.78047e+07	4.15549e+07	4.82721e+07	1.62631e+07	1.66229e+07	1.24771e+07	1.49614e+07	1.45963e+07	1.82901e+06	1.60398e+07	1.31734e+07	6.86972e+07	5.46622e+07	-1.27437	0.0338932	-0.657178
Q9NSE4	IARS2	Isoleucine--tRNA ligase, mitochondrial OS=Homo sapiens OX=9606 GN=IARS2 PE=1 SV=2	79	16	1012	5.6206e+07	5.20559e+07	9.26052e+06	4.34461e+07	3.04032e+07	5.1964e+07	6.03814e+07	4.93411e+07	5.39185e+07	5.14631e+07	0	1.38052e+07	8.1721e+06	6.14579e+06	0	0	0	3.96694e+06	2.77261e+07	5.00929e+07	-2.78612	5.71265e-05	-1.69326
P07148	FABP1	Fatty acid-binding protein, liver OS=Homo sapiens OX=9606 GN=FABP1 PE=1 SV=1	79	11	127	3.44889e+08	6.21345e+08	6.74613e+07	2.01621e+08	1.09032e+08	2.55891e+08	2.1076e+08	5.5983e+07	7.99615e+07	1.61151e+08	4.8343e+06	829555	0	0	0	0	0	0	1.07077e+08	1.23254e+08	-4.07286	0.0128624	-1.01338
Q9UL12	SARDH	Sarcosine dehydrogenase, mitochondrial OS=Homo sapiens OX=9606 GN=SARDH PE=1 SV=1	79	18	918	6.20998e+07	1.11443e+08	1.3522e+07	3.44035e+07	9.22439e+06	8.18344e+07	6.86005e+07	2.85658e+07	6.8974e+07	7.43549e+07	0	865892	0	3.06244e+06	4.99751e+06	0	3.74736e+06	0	4.60685e+06	5.80298e+07	-4.84816	0.00222158	-1.61296
P10321	HLA-C	HLA class I histocompatibility antigen, C alpha chain OS=Homo sapiens OX=9606 GN=HLA-C PE=1 SV=3	78	3	366	1.05861e+07	6.32747e+06	2.14361e+07	1.18619e+06	1.44454e+07	6.39622e+06	1.8426e+06	1.02058e+07	7.38698e+06	7.59579e+06	9.82241e+06	2.62971e+07	1.13016e+07	4.75818e+07	9.28421e+06	3.4003e+07	3.43823e+07	1.4016e+07	2.24464e+07	1.30898e+07	1.41059	0.0273844	0.791581
P05387	RPLP2	60S acidic ribosomal protein P2 OS=Homo sapiens OX=9606 GN=RPLP2 PE=1 SV=1	78	7	115	3.34186e+07	3.46816e+07	3.52154e+07	3.52531e+07	3.64402e+07	2.64514e+07	2.86134e+07	2.63755e+07	2.48073e+07	2.78809e+07	6.12032e+07	6.05538e+07	1.19368e+08	2.92679e+07	3.29777e+07	5.05891e+07	9.13629e+07	5.65868e+07	5.74187e+07	3.38901e+07	1.00745	0.0222442	1.02063
P31150	GDI1	Rab GDP dissociation inhibitor alpha OS=Homo sapiens OX=9606 GN=GDI1 PE=1 SV=2	78	8	447	7.97001e+06	1.93098e+07	7.79113e+06	1.31533e+07	1.35025e+07	1.36532e+07	1.98085e+07	2.21521e+07	2.48515e+07	2.53826e+07	4.06146e+07	3.30717e+07	7.88868e+06	3.58801e+07	1.44073e+07	1.46873e+07	1.50563e+07	3.69346e+07	2.31123e+07	2.31554e+07	0.555501	0.161954	0.447427
P07741	APRT	Adenine phosphoribosyltransferase OS=Homo sapiens OX=9606 GN=APRT PE=1 SV=2	78	4	180	9.2878e+07	120325265	1.68939e+08	1.13652e+08	1.12974e+08	1.59661e+08	7.65697e+07	9.88875e+07	9.06433e+07	8.78667e+07	4.67277e+07	1.04736e+08	1.53033e+08	7.69692e+07	1.86161e+08	1.93423e+08	1.26444e+08	8.09752e+07	7.37893e+07	7.72286e+07	0.0451327	0.881688	0.0455581
Q07021	C1QBP	Complement component 1 Q subcomponent-binding protein, mitochondrial OS=Homo sapiens OX=9606 GN=C1QBP PE=1 SV=1	78	4	282	8.35783e+07	9.5816e+07	4.77245e+07	6.79191e+07	9.86782e+07	9.01279e+07	7.29847e+07	8.60407e+07	6.54413e+07	6.83837e+07	3.53926e+07	3.08865e+07	6.87836e+07	2.621e+07	5.91832e+06	1.35045e+07	3.43562e+07	3.77986e+07	4.7449e+07	8.22855e+07	-1.21894	0.000240594	-1.36882
Q9NX63	CHCHD3	MICOS complex subunit MIC19 OS=Homo sapiens OX=9606 GN=CHCHD3 PE=1 SV=1	78	9	227	7.42333e+07	5.99502e+07	1.76842e+07	5.72919e+07	9.16379e+07	6.90262e+07	6.03372e+07	6.5213e+07	6.24031e+07	6.31976e+07	1.28565e+07	1.84381e+07	1.99457e+07	1.26424e+07	1.81575e+07	1.16121e+07	2.17403e+07	1.26507e+07	4.28948e+07	6.15346e+07	-1.70906	9.84388e-05	-1.61403
P08195	SLC3A2	4F2 cell-surface antigen heavy chain OS=Homo sapiens OX=9606 GN=SLC3A2 PE=1 SV=3	78	11	630	7.73869e+07	9.86468e+07	1.2438e+07	5.30553e+07	4.81065e+07	5.37104e+07	7.37188e+07	1.88541e+07	5.47747e+07	6.55392e+07	0	4.80773e+06	6.50557e+06	0	1.57646e+07	1.57641e+07	2.7273e+07	0	3.35378e+07	5.20131e+07	-2.27192	0.00108624	-1.21534
P12694	BCKDHA	2-oxoisovalerate dehydrogenase subunit alpha, mitochondrial OS=Homo sapiens OX=9606 GN=BCKDHA PE=1 SV=2	78	11	445	5.71222e+07	5.36654e+07	1.59053e+07	4.37609e+07	3.22505e+07	6.83196e+07	4.74112e+07	6.02162e+07	5.05989e+07	5.38419e+07	0	1.16861e+07	8.43845e+06	0	0	0	0	1.75073e+06	1.75329e+07	5.54167e+07	-3.46373	1.11391e-05	-2.15469
Q12805	EFEMP1	EGF-containing fibulin-like extracellular matrix protein 1 OS=Homo sapiens OX=9606 GN=EFEMP1 PE=1 SV=2	77	12	493	3.83956e+06	0	5.82005e+07	1.34254e+07	2.93998e+06	0	3.43705e+06	7.13628e+06	1.37503e+06	1.55252e+07	1.37136e+08	1.3654e+08	6.21536e+07	3.99397e+08	5.86489e+07	2.1413e+07	7.52545e+07	9.95345e+07	4.01609e+07	6.64335e+06	3.43449	0.0495823	0.83678
Q9UBX5	FBLN5	Fibulin-5 OS=Homo sapiens OX=9606 GN=FBLN5 PE=1 SV=1	77	11	448	1.02154e+07	1.87872e+06	2.99687e+08	6.84102e+07	7.78445e+06	0	4.09484e+06	8.24858e+06	1.06952e+07	5.50848e+07	5.07792e+08	6.28707e+08	3.33308e+08	1323643846	3.80998e+08	8.38711e+08	2.02856e+08	162687706	3.64469e+07	1.44487e+07	3.39576	0.0224031	0.959703
P04844	RPN2	Dolichyl-diphosphooligosaccharide--protein glycosyltransferase subunit 2 OS=Homo sapiens OX=9606 GN=RPN2 PE=1 SV=3	77	8	631	2.80876e+07	1.97616e+07	3.55672e+07	3.96118e+07	2.10513e+07	1.83933e+07	2.67525e+07	3.20893e+07	2.47096e+07	1.73658e+07	5.63386e+07	9.89033e+07	6.2642e+07	5.37125e+07	3.67324e+07	9.28543e+07	1.51841e+08	5.84944e+07	4.2862e+07	3.5379e+07	1.46493	0.0121136	1.12311
P25311	AZGP1	Zinc-alpha-2-glycoprotein OS=Homo sapiens OX=9606 GN=AZGP1 PE=1 SV=2	77	6	298	4.97577e+07	6.3518e+07	4.16523e+07	2.28292e+07	7.13738e+07	4.16686e+07	4.8983e+07	3.9846e+07	6.74425e+07	5.60716e+07	3.88328e+07	3.47366e+07	6.52694e+07	6.98796e+07	1.54117e+08	3.16754e+07	6.05943e+07	7.60743e+07	5.24228e+07	3.28065e+07	0.366022	0.339656	0.296977
P53396	ACLY	ATP-citrate synthase OS=Homo sapiens OX=9606 GN=ACLY PE=1 SV=3	77	19	1101	5.11465e+07	3.65643e+07	3.03936e+07	6.6306e+07	3.08559e+07	1.97147e+07	3.28435e+07	2.82927e+07	1.57593e+07	2.87478e+07	5.53899e+06	3.23443e+07	7.83042e+06	1.12147e+07	3.39919e+07	6.42262e+07	3.20021e+07	2.27086e+07	8.97628e+07	3.444e+07	-0.0330444	0.95085	-0.0191891
Q92499	DDX1	ATP-dependent RNA helicase DDX1 OS=Homo sapiens OX=9606 GN=DDX1 PE=1 SV=2	77	8	740	2.35569e+07	2.61448e+07	4.14597e+07	2.97943e+07	3.4508e+07	1.99758e+07	2.5209e+07	2.92434e+07	2.56656e+07	1.73659e+07	3.25509e+07	2.67455e+07	3.30028e+07	3.552e+07	2.13435e+07	1.85798e+07	1.67334e+07	2.44317e+07	2.84068e+07	2.47663e+07	-0.0496949	0.811106	-0.0717876
P00403	MT-CO2	Cytochrome c oxidase subunit 2 OS=Homo sapiens OX=9606 GN=MT-CO2 PE=1 SV=1	77	4	227	3.40565e+08	3.22486e+08	2.07618e+08	2.99933e+08	4.63056e+08	4.35765e+08	2.38238e+08	3.73181e+08	2.79429e+08	3.13118e+08	7.27718e+07	1.00745e+08	8.6147e+07	5.33508e+07	1.29759e+08	1.53108e+08	1.11277e+08	5.18716e+07	1.03617e+08	3.39677e+08	-1.77194	1.21879e-05	-2.14374
Q9Y2J2	EPB41L3	Band 4.1-like protein 3 OS=Homo sapiens OX=9606 GN=EPB41L3 PE=1 SV=2	77	12	1087	5.49415e+07	9.05487e+07	2.69184e+07	3.51144e+07	5.47476e+07	6.70112e+07	6.47448e+07	2.19491e+07	5.31303e+07	4.58668e+07	0	6.80174e+06	3.08072e+06	3.12042e+06	0	7.13994e+06	5.55461e+06	2.40606e+06	2.78726e+07	3.51905e+07	-3.04961	0.000240549	-1.65314
O15143	ARPC1B	Actin-related protein 2/3 complex subunit 1B OS=Homo sapiens OX=9606 GN=ARPC1B PE=1 SV=3	76	8	372	8.52085e+06	2.50156e+06	1.84939e+07	1.34742e+07	2.55121e+06	0	1.56286e+07	3.08482e+06	5.09047e+06	1.03667e+07	3.26418e+07	5.09304e+07	6.84846e+07	5.84454e+07	7.0871e+07	1.73875e+08	7.73799e+07	7.0503e+07	4.51328e+07	2.19146e+07	3.17571	0.000722637	1.44018
P31948	STIP1	Stress-induced-phosphoprotein 1 OS=Homo sapiens OX=9606 GN=STIP1 PE=1 SV=1	76	9	543	5.65013e+07	6.196e+07	65932353	6.61096e+07	6.98812e+07	5.72192e+07	4.91678e+07	6.09653e+07	5.45468e+07	5.09533e+07	8.46642e+07	7.56718e+07	1.15097e+08	1.00131e+08	5.19708e+07	1.65118e+08	1.08721e+08	9.49938e+07	7.41594e+07	5.63639e+07	0.705284	0.0186291	1.01645
P50570	DNM2	Dynamin-2 OS=Homo sapiens OX=9606 GN=DNM2 PE=1 SV=2	76	12	870	2.86451e+07	2.83165e+07	5.11483e+07	4.21202e+07	4.15758e+07	2.55959e+07	1.77495e+07	3.14075e+07	2.75749e+07	1.92758e+07	3.15717e+07	3.01281e+07	4.66101e+07	3.04142e+07	5.60693e+07	5.63303e+07	3.28813e+07	3.10741e+07	3.08751e+07	2.82519e+07	0.294535	0.239733	0.343165
Q04828	AKR1C1	Aldo-keto reductase family 1 member C1 OS=Homo sapiens OX=9606 GN=AKR1C1 PE=1 SV=1	76	2	323	1.07044e+07	0	1.79211e+06	1.45133e+06	0	0	0	4.72224e+06	0	0	1.76206e+06	1.15616e+06	0	0	0	0	0	2.0533e+06	1.30319e+07	0	0.0995419	0.950919	0.0183825
P34932	HSPA4	Heat shock 70 kDa protein 4 OS=Homo sapiens OX=9606 GN=HSPA4 PE=1 SV=4	76	11	840	4.38865e+07	4.41371e+07	3.19455e+07	3.81415e+07	3.83744e+07	2.68104e+07	3.93288e+07	3.76983e+07	3.35906e+07	3.72299e+07	3.83699e+07	3.13437e+07	3.27713e+07	4.35813e+07	3.63508e+07	2.51312e+07	3.5778e+07	3.97429e+07	3.73378e+07	4.07734e+07	-0.0600676	0.610674	-0.15112
P20674	COX5A	Cytochrome c oxidase subunit 5A, mitochondrial OS=Homo sapiens OX=9606 GN=COX5A PE=1 SV=2	76	7	150	148541501	1.66505e+08	8.14508e+07	1.22591e+08	1.78661e+08	1.29548e+08	1.49304e+08	1.27604e+08	1.16485e+08	1.61254e+08	6.65567e+07	3.16448e+07	4.22965e+07	2.80456e+07	1.76991e+07	4.09589e+07	3.69018e+07	2.42193e+07	8.7017e+07	1.66059e+08	-1.72843	1.05351e-05	-2.01936
P16219	ACADS	Short-chain specific acyl-CoA dehydrogenase, mitochondrial OS=Homo sapiens OX=9606 GN=ACADS PE=1 SV=1	76	9	412	6.88122e+07	3.50097e+07	1.7469e+07	5.8087e+07	2.10804e+07	8.14634e+07	6.15013e+07	7.36254e+07	4.89359e+07	6.0981e+07	0	0	0	1.24241e+06	15405316	1.59335e+07	0	0	3.32454e+07	6.77659e+07	-2.84896	0.000281779	-1.42724
O75521	ECI2	Enoyl-CoA delta isomerase 2, mitochondrial OS=Homo sapiens OX=9606 GN=ECI2 PE=1 SV=4	76	10	394	7.93806e+07	8.13993e+07	1.3981e+07	3.99497e+07	2.00542e+07	4.96194e+07	5.48574e+07	4.46112e+07	4.89926e+07	8.8317e+07	0	1.03705e+06	0	0	0	0	2.50842e+06	4.06396e+06	1.29923e+07	6.82713e+07	-4.50889	0.00067445	-1.79682
Q86WU2	LDHD	Probable D-lactate dehydrogenase, mitochondrial OS=Homo sapiens OX=9606 GN=LDHD PE=1 SV=1	76	9	507	4.33781e+07	7.8245e+07	7.02337e+06	8.34443e+07	6.94138e+07	6.25248e+07	3.78083e+07	7.67561e+07	3.8334e+07	9.63438e+07	0	691066	4.06217e+06	0	0	1.67465e+06	0	0	6.19549e+06	6.43677e+07	-5.40252	0.000502232	-2.08
Q9BYV1	AGXT2	Alanine--glyoxylate aminotransferase 2, mitochondrial OS=Homo sapiens OX=9606 GN=AGXT2 PE=1 SV=1	76	15	514	1.59795e+08	1.50074e+08	2.35125e+07	7.68022e+07	6.50771e+07	1.88497e+08	8.62055e+07	4.26963e+07	111410557	1.66673e+08	0	0	0	0	0	4.28114e+06	0	0	1.02193e+07	6.95745e+07	-6.05437	0.00108721	-1.84243
P62917	RPL8	60S ribosomal protein L8 OS=Homo sapiens OX=9606 GN=RPL8 PE=1 SV=2	75	7	257	3.19416e+07	3.07535e+07	9.03469e+07	5.90916e+07	6.48814e+07	5.30718e+07	3.97205e+07	4.38289e+07	3.73645e+07	3.1555e+07	7.60072e+07	101611435	1.05725e+08	9.58139e+07	1.9802e+08	1.48017e+08	2.3295e+08	9.79833e+07	6.33627e+07	4.13417e+07	1.36608	0.00993703	1.05743
Q16181	SEPTIN7	Septin-7 OS=Homo sapiens OX=9606 GN=SEPTIN7 PE=1 SV=2	75	10	437	2.84692e+07	2.00636e+07	6.82515e+07	4.07666e+07	2.87687e+07	1.40899e+07	3.40219e+07	4.55618e+07	3.48557e+07	3.65423e+07	1.41872e+08	1.10233e+08	6.99383e+07	1.15609e+08	7.89159e+07	3.72653e+07	4.04501e+07	7.17138e+07	4.57633e+07	3.97717e+07	1.17032	0.0164629	0.903024
Q10567	AP1B1	AP-1 complex subunit beta-1 OS=Homo sapiens OX=9606 GN=AP1B1 PE=1 SV=2	75	5	949	4.81321e+07	4.87372e+07	4.75252e+07	4.40299e+07	3.86094e+07	3.1606e+07	5.30666e+07	48819394	5.06155e+07	4.96093e+07	5.69654e+07	8.48994e+07	7.12308e+07	5.91087e+07	5.6742e+07	3.88088e+07	4.62293e+07	6.79825e+07	7.81589e+07	5.66559e+07	0.433768	0.0258624	0.805609
Q9Y265	RUVBL1	RuvB-like 1 OS=Homo sapiens OX=9606 GN=RUVBL1 PE=1 SV=1	75	9	456	2.21727e+07	2.17602e+07	3.46428e+07	1.9232e+07	2.60978e+07	2.62374e+07	1.9525e+07	2.51715e+07	1.93771e+07	2.25849e+07	3.57469e+07	2.69032e+07	3.33314e+07	2.93918e+07	4.17863e+06	2.31818e+07	1.46175e+07	2.6089e+07	2.98295e+07	2.5483e+07	0.0671125	0.792753	0.0821049
P62136	PPP1CA	Serine/threonine-protein phosphatase PP1-alpha catalytic subunit OS=Homo sapiens OX=9606 GN=PPP1CA PE=1 SV=1	75	2	330	9.60931e+06	1.01423e+07	1.21799e+07	1.15913e+07	1.04446e+07	1.01735e+07	9.52111e+06	8.47654e+06	9.7863e+06	7.08878e+06	2.87501e+06	1.06995e+07	1.66215e+07	7.48478e+06	2.47517e+06	1.30016e+07	9.47052e+06	9.04935e+06	1.33285e+07	8.68129e+06	-0.0680599	0.824349	-0.0787321
P63010	AP2B1	AP-2 complex subunit beta OS=Homo sapiens OX=9606 GN=AP2B1 PE=1 SV=1	75	4	937	1.42137e+07	1.23862e+07	2.59712e+07	1.74976e+07	1.80194e+07	1.13506e+07	1.6394e+07	1.73832e+07	1.31041e+07	1.49458e+07	1.07875e+07	1.51486e+07	4.43979e+06	15310209	5.32188e+06	8.38444e+06	6.09347e+06	1.45204e+07	1.4664e+07	1.52803e+07	-0.616454	0.0261819	-0.681463
P36542	ATP5F1C	ATP synthase subunit gamma, mitochondrial OS=Homo sapiens OX=9606 GN=ATP5F1C PE=1 SV=1	75	10	298	9.65333e+07	7.87645e+07	4.04454e+07	8.08547e+07	9.2509e+07	8.28563e+07	1.21243e+08	6.812e+07	6.88117e+07	9.70386e+07	2.14981e+07	1.15447e+07	2.63285e+07	6.42394e+06	1.16034e+07	2.7951e+06	6.61127e+06	1.10754e+07	6.70282e+07	1.02327e+08	-2.17453	5.17044e-05	-1.64883
Q12955	ANK3	Ankyrin-3 OS=Homo sapiens OX=9606 GN=ANK3 PE=1 SV=3	75	15	4377	6.47486e+07	4.42375e+07	1.64993e+07	3.87265e+07	2.96881e+07	4.99334e+07	4.88678e+07	4.19983e+07	5.09099e+07	3.87979e+07	2.26509e+06	905704	0	0	4.00917e+06	4.86521e+06	2.16968e+06	0	24736574	4.86054e+07	-3.2937	1.9539e-05	-1.92609
Q9Y6C9	MTCH2	Mitochondrial carrier homolog 2 OS=Homo sapiens OX=9606 GN=MTCH2 PE=1 SV=1	75	8	303	8.21678e+07	6.58489e+07	2.67277e+07	5.66016e+07	3.54456e+07	7.70399e+07	6.54303e+07	5.46014e+07	7.6032e+07	9.58339e+07	1.80959e+06	5.40989e+06	3.79729e+06	2.20101e+06	0	7.22496e+06	2.81009e+06	6.02292e+06	2.01643e+07	5.03075e+07	-3.53266	7.65506e-05	-2.26579
Q14894	CRYM	Ketimine reductase mu-crystallin OS=Homo sapiens OX=9606 GN=CRYM PE=1 SV=1	75	8	314	1.05228e+08	2.53569e+08	2.60627e+07	1.01822e+08	9.29238e+07	2.10806e+08	9.63073e+07	1.40113e+08	1.26174e+08	1.71783e+08	0	0	0	0	1.2625e+07	1.39938e+07	3.1875e+06	0	4.28381e+07	1.42346e+08	-4.03677	0.000826884	-1.65225
P67809	YBX1	Y-box-binding protein 1 OS=Homo sapiens OX=9606 GN=YBX1 PE=1 SV=3	74	9	324	1.91582e+07	2.21831e+07	2.51126e+07	2.88863e+07	1.86597e+07	1.89369e+07	1.19176e+07	17145317	2.00223e+07	1.61617e+07	3.26114e+07	3.99939e+07	7.31279e+07	4.26863e+07	4.04473e+07	2.47228e+07	6.88109e+07	3.78435e+07	5.69986e+07	2.35703e+07	1.22605	0.00364284	1.33026
P02749	APOH	Beta-2-glycoprotein 1 OS=Homo sapiens OX=9606 GN=APOH PE=1 SV=3	74	5	345	5.11924e+07	5.87825e+07	4.0598e+07	1.63558e+07	4.72823e+07	1.87e+07	6.8588e+07	3.61995e+07	6.0428e+07	3.78307e+07	1.90648e+08	4.89507e+07	8.68809e+07	8.85687e+07	9.82414e+07	6.30857e+07	4.00403e+07	1.09192e+08	3.73022e+07	2.74326e+07	0.959329	0.0397972	0.674126
Q14152	EIF3A	Eukaryotic translation initiation factor 3 subunit A OS=Homo sapiens OX=9606 GN=EIF3A PE=1 SV=1	74	9	1382	2.04184e+07	1.76173e+07	2.59516e+07	2.75412e+07	1.36164e+07	1.30658e+07	1.3702e+07	2.13507e+07	1.61386e+07	2.01368e+07	3.16878e+07	3.70603e+07	3.99217e+07	4.04024e+07	2.10228e+07	3.12553e+07	2.12807e+07	3.21984e+07	3.50066e+07	2.36639e+07	0.764746	0.00096371	1.15029
P98082	DAB2	Disabled homolog 2 OS=Homo sapiens OX=9606 GN=DAB2 PE=1 SV=3	74	13	770	6.81664e+07	9.56555e+07	3.32819e+07	6.11793e+07	6.00136e+07	6.67961e+07	6.73068e+07	3.80117e+07	6.47051e+07	6.33089e+07	3.00526e+06	2.59269e+06	0	2.05961e+06	2.54855e+07	0	0	2.50482e+06	5.42502e+07	4.73968e+07	-2.63023	8.553e-05	-1.54228
P14923	JUP	Junction plakoglobin OS=Homo sapiens OX=9606 GN=JUP PE=1 SV=3	74	9	745	2.22381e+07	1.56165e+07	1.95169e+07	1.73973e+07	9.68536e+06	1.83843e+07	1.52091e+07	2.93509e+07	2.21296e+07	1.89532e+07	3.31613e+06	5.6864e+06	0	0	0	0	0	3.20748e+06	1.04944e+07	2.08021e+07	-2.90137	1.54509e-05	-1.95071
Q92947	GCDH	Glutaryl-CoA dehydrogenase, mitochondrial OS=Homo sapiens OX=9606 GN=GCDH PE=1 SV=1	74	11	438	8.66581e+07	8.17266e+07	1.36221e+07	81262372	4.12365e+07	1.55482e+08	3.49746e+07	1.16753e+08	7.09385e+07	6.05224e+07	7.05731e+06	1.17471e+07	0	6.42662e+06	5.69954e+06	0	2.22816e+06	4.65075e+06	1.02236e+07	1.18032e+08	-3.7996	0.00185823	-1.61007
P09972	ALDOC	Fructose-bisphosphate aldolase C OS=Homo sapiens OX=9606 GN=ALDOC PE=1 SV=2	73	3	364	2.99675e+07	3.043e+07	4.87972e+07	4.84819e+07	4.95379e+07	2.22123e+07	3.02915e+07	5.14524e+07	3.39362e+07	3.97899e+07	9.96452e+07	5.31427e+07	1.13225e+08	7.53811e+07	2.13918e+07	1.45837e+08	1.00547e+08	8.59582e+07	7.89587e+07	4.39316e+07	1.16003	0.0098067	1.09241
O15400	STX7	Syntaxin-7 OS=Homo sapiens OX=9606 GN=STX7 PE=1 SV=4	73	7	261	3.60383e+07	3.683e+07	2.59111e+07	3.62664e+07	3.37006e+07	3.29147e+07	4.50993e+07	3.10016e+07	2.80943e+07	3.53428e+07	2.41121e+07	2.45846e+07	2.57729e+07	2.78554e+07	4.19928e+07	4.09251e+07	4.71654e+07	2.86288e+07	4.93867e+07	3.71375e+07	0.0156287	0.937764	0.0252971
Q8N1G4	LRRC47	Leucine-rich repeat-containing protein 47 OS=Homo sapiens OX=9606 GN=LRRC47 PE=1 SV=1	73	11	583	2.32572e+07	2.26072e+07	4.97902e+07	3.49041e+07	2.80268e+07	4.24556e+07	2.04902e+07	2.84901e+07	2.38616e+07	2.01989e+07	2.82964e+07	2.88567e+07	9.69722e+06	2.90711e+07	8.30233e+07	1.25032e+06	2.8218e+07	1.68768e+07	2.0819e+07	2.51891e+07	-0.104918	0.835749	-0.0660932
Q9H9B4	SFXN1	Sideroflexin-1 OS=Homo sapiens OX=9606 GN=SFXN1 PE=1 SV=4	73	8	322	6.09435e+07	7.17082e+07	7.90955e+06	4.03262e+07	3.20548e+07	6.35248e+07	9.08042e+07	3.61533e+07	4.65873e+07	7.32418e+07	4.88398e+06	5.47094e+06	0	3.26633e+06	0	4.21297e+06	3.6543e+06	2.73511e+06	4.39093e+07	6.17078e+07	-2.78908	0.000880216	-1.24212
P26447	S100A4	Protein S100-A4 OS=Homo sapiens OX=9606 GN=S100A4 PE=1 SV=1	72	6	101	2.01442e+07	1.26211e+07	4.22478e+07	2.01786e+07	2.91131e+07	9.93719e+06	2.04378e+07	2.53841e+07	1.04776e+07	2.47023e+07	1.63453e+08	1.41359e+08	2.12078e+08	1.80861e+08	1.66243e+08	2.17654e+08	1.94784e+08	1.19386e+08	4.98207e+07	3.41865e+07	2.89967	0.000281779	2.3769
P20774	OGN	Mimecan OS=Homo sapiens OX=9606 GN=OGN PE=1 SV=1	72	9	298	1.90184e+07	1.62396e+07	1.63287e+08	3.04685e+07	5.91571e+07	1.09865e+07	3.669e+07	4.82323e+07	3.03366e+07	6.90987e+07	4.48154e+08	9.9333e+07	5.36115e+07	3.23522e+08	9.73638e+07	4.70534e+07	7.51087e+06	1.81536e+08	1.34765e+07	3.50115e+07	1.54697	0.162328	0.502331
P46781	RPS9	40S ribosomal protein S9 OS=Homo sapiens OX=9606 GN=RPS9 PE=1 SV=3	72	8	194	3.20773e+07	2.26003e+07	4.53815e+07	4.15895e+07	3.29155e+07	4.10616e+07	4.19824e+07	4.04284e+07	3.15288e+07	2.79573e+07	5.29718e+07	7.75277e+07	6.51908e+07	7.7357e+07	1.05605e+08	1.04169e+08	1.07041e+08	8.15849e+07	5.62236e+07	3.95013e+07	1.17726	0.00067372	1.68926
P20962	PTMS	Parathymosin OS=Homo sapiens OX=9606 GN=PTMS PE=1 SV=2	72	5	102	3.70803e+07	7.50101e+07	3.78225e+07	3.82152e+07	7.79388e+07	4.12572e+07	2.75239e+07	2.41892e+07	2.55528e+07	2.46986e+07	1.01393e+08	4.44982e+07	7.54579e+07	8.93135e+07	4.80934e+07	2.58239e+07	4.3733e+07	3.30428e+07	3.28692e+07	2.89289e+07	0.424052	0.281597	0.315844
Q01955	COL4A3	Collagen alpha-3(IV) chain OS=Homo sapiens OX=9606 GN=COL4A3 PE=1 SV=3	72	3	1670	2.64213e+08	192032479	4.2658e+08	2.63786e+08	275384640	2.4002e+08	3.41199e+08	3.41457e+08	2.77864e+08	166119453	1.74844e+08	3.05066e+08	231838094	2.03301e+08	2.8966e+08	3.4021e+07	3.98178e+07	3.5968e+08	2.69014e+08	2.50025e+08	-0.39608	0.205063	-0.374149
Q86WA6	BPHL	Valacyclovir hydrolase OS=Homo sapiens OX=9606 GN=BPHL PE=1 SV=1	72	8	291	7.24843e+07	1.25408e+08	2.43837e+07	6.85521e+07	4.57519e+07	132271852	1.1353e+08	9.31163e+07	8.23614e+07	1.49356e+08	0	3.56883e+06	4.85475e+06	5.43485e+06	6.52335e+06	8.25077e+06	1.32369e+07	1.07006e+06	1.81674e+07	9.26109e+07	-3.74003	0.000502244	-1.94495
P62906	RPL10A	60S ribosomal protein L10a OS=Homo sapiens OX=9606 GN=RPL10A PE=1 SV=2	71	5	217	1.56799e+07	1.39236e+07	2.65851e+07	2.12931e+07	1.37373e+07	1.21018e+07	2.10352e+07	2.40575e+07	1.68224e+07	1.87156e+07	3.6454e+07	4.26542e+07	3.09755e+07	3.0734e+07	4.07692e+07	3.55449e+07	5.5706e+07	4.31993e+07	3.15871e+07	2.17219e+07	1.07021	5.24761e-05	1.66875
Q9NVA2	SEPTIN11	Septin-11 OS=Homo sapiens OX=9606 GN=SEPTIN11 PE=1 SV=3	71	5	429	2.57249e+07	2.36577e+07	8.63271e+07	3.17994e+07	1.9151e+07	2.81166e+07	3.33232e+07	4.2231e+07	3.04383e+07	3.01668e+07	7.06371e+07	6.77073e+07	2.5132e+07	9.30756e+07	1.88471e+08	3.39178e+07	4.61898e+07	6.823e+07	4.3396e+07	2.97992e+07	1.01154	0.0812161	0.555502
Q9P0M6	MACROH2A2	Core histone macro-H2A.2 OS=Homo sapiens OX=9606 GN=H2AFY2 PE=1 SV=3	71	3	372	5.96081e+06	1.1492e+06	1.0757e+07	4.08614e+06	0	0	4.11656e+06	6.38821e+06	3.11626e+06	6.80953e+06	1.7687e+07	5.99207e+06	0	1.20714e+07	0	0	0	6.84694e+06	7.18342e+06	6.63565e+06	0.384088	0.64489	0.141189
P49588	AARS1	Alanine--tRNA ligase, cytoplasmic OS=Homo sapiens OX=9606 GN=AARS1 PE=1 SV=2	71	15	968	2.7419e+07	2.30603e+07	2.3797e+07	3.74411e+07	2.16532e+07	3.17659e+07	2.372e+07	2.3542e+07	2.25547e+07	2.52728e+07	1.28489e+07	2.84178e+07	1.84969e+07	2.95452e+07	3.24195e+07	2.9535e+07	7.05464e+07	1.9441e+07	2.36635e+07	2.79661e+07	0.177761	0.612786	0.166878
P78417	GSTO1	Glutathione S-transferase omega-1 OS=Homo sapiens OX=9606 GN=GSTO1 PE=1 SV=2	71	7	241	9.8021e+07	1.35569e+08	8.03595e+07	7.98032e+07	6.81396e+07	8.00191e+07	4.83027e+07	7.254e+07	6.60469e+07	8.47151e+07	7.10397e+07	7.08073e+07	4.09982e+07	5.5905e+07	6.51138e+07	1.99353e+08	1.42098e+08	4.23815e+07	1.06251e+08	88256168	0.116875	0.773444	0.0960429
Q9Y2T3	GDA	Guanine deaminase OS=Homo sapiens OX=9606 GN=GDA PE=1 SV=1	71	14	454	9.59252e+07	1.15225e+08	2.98804e+07	5.73654e+07	4.77819e+07	6.47755e+07	9.81361e+07	1.40198e+07	4.93234e+07	8.27245e+07	4.38917e+07	2.26337e+07	9.73195e+06	2.3164e+07	1.78819e+07	8.56619e+06	2.48307e+07	2.98158e+07	118229096	8.40693e+07	-0.980924	0.0807281	-0.519586
Q9Y617	PSAT1	Phosphoserine aminotransferase OS=Homo sapiens OX=9606 GN=PSAT1 PE=1 SV=2	71	12	370	1.07502e+08	1.38286e+08	2.27407e+07	5.05915e+07	1.78421e+07	5.31769e+07	1.13316e+08	1.56392e+07	4.2912e+07	7.29412e+07	0	0	4.53698e+06	2.90113e+06	4.62725e+06	0	2.39138e+06	0	3.90942e+07	4.63057e+07	-3.41565	0.00625405	-1.08804
P51648	ALDH3A2	Aldehyde dehydrogenase family 3 member A2 OS=Homo sapiens OX=9606 GN=ALDH3A2 PE=1 SV=1	71	10	485	7.55523e+07	8.44636e+07	3.02914e+07	1.35952e+07	3.45738e+07	9.7993e+07	7.006e+07	6.50091e+07	6.25546e+07	6.17198e+07	9.86999e+06	5.94386e+06	1.9554e+06	3.41933e+06	0	0	1.34991e+06	4.02201e+06	1.58031e+07	5.52175e+07	-3.66196	0.000474749	-1.85358
Q9ULV4	CORO1C	Coronin-1C OS=Homo sapiens OX=9606 GN=CORO1C PE=1 SV=1	70	9	474	1.68536e+07	2.09307e+07	2.97895e+07	2.86076e+07	2.2392e+07	1.24727e+07	2.34982e+07	1.66856e+07	1.41391e+07	2.56711e+07	7.48327e+07	4.60144e+07	7.85127e+07	6.15606e+07	8.83593e+07	1.15096e+08	9.19813e+07	5.61549e+07	4.65385e+07	2.2604e+07	1.79487	0.000592618	1.90378
P16615	ATP2A2	Sarcoplasmic/endoplasmic reticulum calcium ATPase 2 OS=Homo sapiens OX=9606 GN=ATP2A2 PE=1 SV=1	70	4	1042	1.50792e+07	1.05664e+07	2.14129e+07	2.18495e+07	1.08803e+07	1.48406e+07	1.48172e+07	1.57825e+07	6.40754e+06	1.39419e+07	3.3967e+07	3.09222e+07	2.49159e+07	1.99763e+07	1.90867e+07	4.1906e+07	5.86959e+07	2.4568e+07	2.46118e+07	2.18062e+07	1.08866	0.011157	1.0022
Q16658	FSCN1	Fascin OS=Homo sapiens OX=9606 GN=FSCN1 PE=1 SV=3	70	12	493	2.11202e+07	2.24775e+07	7.402e+07	2.33284e+07	2.99803e+07	9.01265e+06	2.71593e+07	3.41176e+07	3.93522e+07	3.44911e+07	8.79261e+07	4.91614e+07	4.04571e+07	8.47885e+07	7.64316e+07	5.06847e+07	6.35906e+07	5.12801e+07	5.23919e+07	1.85316e+07	0.973311	0.00427335	0.93246
P49773	HINT1	Histidine triad nucleotide-binding protein 1 OS=Homo sapiens OX=9606 GN=HINT1 PE=1 SV=2	70	7	126	1.07242e+08	8.4994e+07	6.44927e+07	5.65267e+07	3.73828e+07	4.52759e+07	9.25862e+07	6.68533e+07	6.69174e+07	1.12681e+08	6.64078e+07	7.24653e+07	4.69372e+07	5.41415e+07	8.22099e+07	5.15789e+07	2.76017e+07	6.71102e+07	1.24711e+08	9.05933e+07	-0.157217	0.605863	-0.152919
O75947	ATP5PD	ATP synthase subunit d, mitochondrial OS=Homo sapiens OX=9606 GN=ATP5PD PE=1 SV=3	70	7	161	1.24997e+08	1.11411e+08	6.89265e+07	1.00882e+08	1.18796e+08	9.10884e+07	1.25876e+08	1.35101e+08	8.83587e+07	1.11528e+08	4.73989e+07	3.59294e+07	4.07347e+07	2.59179e+07	5.12369e+07	2.78488e+07	3.80566e+07	3.18627e+07	7.43967e+07	1.04725e+08	-1.37624	1.22049e-05	-1.98407
P18859	ATP5PF	ATP synthase-coupling factor 6, mitochondrial OS=Homo sapiens OX=9606 GN=ATP5PF PE=1 SV=1	70	5	108	6.82078e+07	6.45475e+07	2.48537e+07	2.96282e+07	4.27145e+07	3.42335e+07	6.7985e+07	6.595e+07	4.34004e+07	6.78434e+07	2.40164e+07	1.41196e+07	5.70721e+06	5.23738e+06	0	0	4.02104e+06	1.04746e+07	3.85052e+07	5.24221e+07	-2.16697	0.000279471	-1.37671
P11182	DBT	Lipoamide acyltransferase component of branched-chain alpha-keto acid dehydrogenase complex, mitochondrial OS=Homo sapiens OX=9606 GN=DBT PE=1 SV=3	70	9	482	4.15332e+07	4.14183e+07	1.24355e+07	3.39391e+07	4.89204e+07	3.80135e+07	3.43538e+07	3.92803e+07	3.94925e+07	3.76144e+07	0	5.12416e+06	1.28852e+06	0	0	0	0	4.3694e+06	6.16113e+06	4.21525e+07	-4.285	1.10054e-06	-3.04088
P15880	RPS2	40S ribosomal protein S2 OS=Homo sapiens OX=9606 GN=RPS2 PE=1 SV=2	69	8	293	2.93821e+07	1.65877e+07	5.34493e+07	2.55157e+07	2.31956e+07	2.24937e+07	3.53497e+07	3.46783e+07	2.14793e+07	2.65089e+07	6.32917e+07	7.93621e+07	5.96802e+07	7.2632e+07	6.80147e+07	85728137	9.82377e+07	7.74528e+07	7.62056e+07	3.70018e+07	1.38955	3.4859e-06	2.23165
Q14974	KPNB1	Importin subunit beta-1 OS=Homo sapiens OX=9606 GN=KPNB1 PE=1 SV=2	69	8	876	2.55392e+07	2.72582e+07	2.55358e+07	2.98111e+07	2.20058e+07	2.37741e+07	2.31327e+07	2.31526e+07	2.55229e+07	2.17118e+07	2.49483e+07	4.25606e+07	4.73913e+07	4.20208e+07	5.40174e+07	8.66183e+07	6.96929e+07	37660817	3.90079e+07	30401584	0.995194	0.0106143	1.23427
Q9Y6N5	SQOR	Sulfide:quinone oxidoreductase, mitochondrial OS=Homo sapiens OX=9606 GN=SQOR PE=1 SV=1	69	11	450	3.90506e+07	3.17688e+07	1.48569e+07	2.58832e+07	2.92821e+07	3.84715e+07	2.91749e+07	1.73706e+07	2.67772e+07	3.14178e+07	1.26214e+07	3.03031e+07	2.59243e+07	9.91242e+06	130356463	1.6052e+08	4.69085e+07	2.27674e+07	5.49191e+07	3.85702e+07	0.951031	0.24602	0.455529
P30626	SRI	Sorcin OS=Homo sapiens OX=9606 GN=SRI PE=1 SV=1	69	7	198	3.72848e+07	2.75811e+07	1.05028e+08	3.77065e+07	5.45137e+07	4.68629e+07	3.9659e+07	5.89731e+07	5.88532e+07	3.10615e+07	6.18674e+07	7.66346e+07	7.10439e+07	7.46871e+07	1.14014e+08	1.3782e+08	9.75683e+07	6.77542e+07	3.84256e+07	3.83137e+07	0.7244	0.0314714	0.658479
P35637	FUS	RNA-binding protein FUS OS=Homo sapiens OX=9606 GN=FUS PE=1 SV=1	69	4	526	2.77594e+07	2.14494e+07	5.08468e+07	2.61692e+07	2.38735e+07	2.44654e+07	1.85054e+07	2.76738e+07	2.44865e+07	2.32772e+07	5.01839e+07	4.28284e+07	5.38904e+07	6.05753e+07	5.15436e+07	2.67398e+07	3.61401e+07	4.06206e+07	3.43299e+07	2.95896e+07	0.715646	0.00443998	0.926681
O94973	AP2A2	AP-2 complex subunit alpha-2 OS=Homo sapiens OX=9606 GN=AP2A2 PE=1 SV=2	69	7	939	3.17268e+07	2.50282e+07	4.07614e+07	3.76224e+07	2.95736e+07	2.77964e+07	34522521	3.20305e+07	2.60253e+07	3.06244e+07	2.68809e+07	3.44659e+07	3.43923e+07	3.01943e+07	1.39226e+07	2.17005e+07	2.00422e+07	3.66155e+07	4.51277e+07	3.20478e+07	-0.109667	0.586072	-0.167379
Q96C23	GALM	Aldose 1-epimerase OS=Homo sapiens OX=9606 GN=GALM PE=1 SV=1	69	7	342	1.00817e+08	1.23775e+08	4.95525e+07	5.21827e+07	6.28467e+07	118746841	7.92697e+07	7.23179e+07	7.07878e+07	9.68893e+07	5.32117e+07	3.35032e+07	5.15667e+07	4.85303e+07	3.67494e+07	4.11679e+07	4.76269e+07	3.17992e+07	5.39203e+07	8.73129e+07	-0.903166	0.00360893	-1.16549
P53634	CTSC	Dipeptidyl peptidase 1 OS=Homo sapiens OX=9606 GN=CTSC PE=1 SV=2	69	9	463	5.06047e+07	7.51463e+07	4.19445e+07	1.91134e+07	3.04171e+07	3.21552e+07	4.62685e+07	3.00608e+07	2.40606e+07	5.45097e+07	1.0493e+07	1.47039e+07	2.65629e+07	1.13218e+07	2.19243e+07	1.99512e+07	7.05549e+06	1.59983e+07	5.72196e+07	3.99461e+07	-0.974034	0.031522	-0.659134
Q14651	PLS1	Plastin-1 OS=Homo sapiens OX=9606 GN=PLS1 PE=1 SV=2	69	3	629	8.52409e+06	9.75698e+06	0	2.05827e+06	7.64898e+06	2.8672e+06	5.54982e+06	0	1.23052e+07	5.35958e+06	0	0	0	0	0	0	0	0	1.80471e+07	8.07055e+06	-1.43106	0.23048	-0.352914
P05937	CALB1	Calbindin OS=Homo sapiens OX=9606 GN=CALB1 PE=1 SV=2	69	10	261	161972438	2.10026e+08	7.52345e+07	2.02015e+08	6.29301e+07	1.64741e+08	2.24508e+08	4.72867e+07	9.38657e+07	1.66899e+08	1.67141e+07	2.84593e+06	3.07628e+06	0	0	0	0	0	1.46167e+07	8.60582e+07	-5.08965	0.000551191	-2.00046
P60866	RPS20	40S ribosomal protein S20 OS=Homo sapiens OX=9606 GN=RPS20 PE=1 SV=1	68	4	119	2.17921e+07	2.18527e+07	2.8121e+07	2.22312e+07	1.38712e+07	1.39454e+07	2.1767e+07	2.2263e+07	2.47723e+07	1.95122e+07	2.93106e+07	4.90433e+07	2.79571e+07	3.26434e+07	4.644e+07	5.97482e+07	6.56116e+07	4.45866e+07	4.32018e+07	3.45437e+07	1.07547	0.00197931	1.41897
P01031	C5	Complement C5 OS=Homo sapiens OX=9606 GN=C5 PE=1 SV=4	68	11	1676	2.81974e+07	1.62858e+07	1.91568e+07	1.25719e+07	2.64412e+07	1.84523e+07	2.93656e+07	2.65559e+07	4.39556e+07	2.21659e+07	2.23588e+07	3.96283e+07	3.36212e+07	4.47301e+07	6.33117e+07	8.37984e+07	2.17794e+07	6.78571e+07	2.77909e+07	3.04595e+07	0.887645	0.0470248	0.709757
Q01813	PFKP	ATP-dependent 6-phosphofructokinase, platelet type OS=Homo sapiens OX=9606 GN=PFKP PE=1 SV=2	68	10	784	6.54007e+06	8.28753e+06	1.21663e+07	2.00765e+07	1.5226e+07	1.11106e+07	22862454	1.27129e+07	8.4618e+06	8.31359e+06	1.46469e+07	9.31639e+06	3.91296e+07	2.14353e+06	2.42752e+06	3.38099e+07	3.29516e+07	2.09104e+07	2.70132e+07	5.52655e+06	0.688058	0.210339	0.422007
P63000	RAC1	Ras-related C3 botulinum toxin substrate 1 OS=Homo sapiens OX=9606 GN=RAC1 PE=1 SV=1	68	3	192	1.87023e+07	1.54033e+07	2.95618e+07	1.59684e+07	8.3156e+06	1.31918e+07	2.18461e+07	2.17299e+07	2.02669e+07	1.8237e+07	2.89231e+07	2.96317e+07	1.66246e+07	2.69752e+07	3.14185e+07	2.32759e+07	3.07412e+07	2.45198e+07	2.94225e+07	1.56379e+07	0.550621	0.00745369	0.862693
P02730	SLC4A1	Band 3 anion transport protein OS=Homo sapiens OX=9606 GN=SLC4A1 PE=1 SV=3	68	10	911	1.04524e+07	8.09968e+07	1.33658e+07	1.87532e+06	1.56098e+07	6.88927e+07	1.83822e+07	4.8971e+07	7.71598e+07	3.33119e+07	3.18217e+07	1.68045e+07	2.47509e+07	1.5378e+07	1.39238e+07	3.42879e+08	2.87058e+06	1.67441e+06	4.77638e+06	1.74611e+07	0.453798	0.761051	0.103247
P31939	ATIC	Bifunctional purine biosynthesis protein PURH OS=Homo sapiens OX=9606 GN=ATIC PE=1 SV=3	68	10	592	6.70669e+07	4.63371e+07	1.425e+08	3.79519e+07	5.30805e+07	9.67778e+07	3.8031e+07	9.35992e+07	1.35434e+08	4.19469e+07	3.80922e+07	5.54637e+07	8.03253e+07	7.98437e+07	1.3742e+08	6.47932e+07	8.83086e+07	101477819	4.80399e+07	3.10841e+07	0.0343253	0.929111	0.0273296
Q9H4M9	EHD1	EH domain-containing protein 1 OS=Homo sapiens OX=9606 GN=EHD1 PE=1 SV=2	68	11	534	3.36065e+07	2.68133e+07	1.69454e+07	3.11917e+07	3.41417e+07	1.86712e+07	3.27659e+07	3.84794e+07	3.64411e+07	3.78658e+07	3.79301e+07	2.91009e+07	3.91437e+07	2.34483e+07	0	3.43705e+07	1.89536e+07	3.30562e+07	3.45058e+07	3.48807e+07	-0.141006	0.614837	-0.151703
P52566	ARHGDIB	Rho GDP-dissociation inhibitor 2 OS=Homo sapiens OX=9606 GN=ARHGDIB PE=1 SV=3	67	10	201	9.77511e+06	9.81185e+06	4.02014e+07	2.08878e+07	2.08379e+07	8.07294e+06	1.72486e+07	1.66951e+07	2.01785e+07	6.51155e+06	6.39614e+07	1.33566e+08	3.6562e+08	1.36769e+08	1.40946e+08	3.10791e+08	2.62575e+08	1.45182e+08	94528642	3.1912e+07	3.43243	0.00418288	1.55887
P07585	DCN	Decorin OS=Homo sapiens OX=9606 GN=DCN PE=1 SV=1	67	10	359	1.14415e+07	1.11512e+07	1.07703e+08	2.47879e+07	2.08362e+07	5.49913e+06	3.29973e+07	3.60544e+07	2.3308e+07	3.2877e+07	4.30551e+08	8.97013e+07	5.96111e+07	1.62004e+08	3.65436e+07	5.9031e+07	1.33724e+08	1.06639e+08	1.42447e+07	2.87579e+07	1.98435	0.104012	0.623997
P39656	DDOST	Dolichyl-diphosphooligosaccharide--protein glycosyltransferase 48 kDa subunit OS=Homo sapiens OX=9606 GN=DDOST PE=1 SV=4	67	7	456	3.03424e+07	3.10826e+07	4.26025e+07	3.40287e+07	3.17173e+07	3.95582e+07	3.16405e+07	3.84843e+07	2.99491e+07	2.8151e+07	7.85779e+07	103532905	9.64032e+07	6.4192e+07	1.08204e+08	1.95604e+08	2.38903e+08	7.21187e+07	4.24657e+07	4.12957e+07	1.7188	0.016507	1.184
P61457	PCBD1	Pterin-4-alpha-carbinolamine dehydratase OS=Homo sapiens OX=9606 GN=PCBD1 PE=1 SV=2	67	5	104	7.84726e+07	8.75661e+07	4.31734e+07	5.31347e+07	6.17387e+07	1.03125e+08	6.2505e+07	7.20769e+07	4.83716e+07	7.81745e+07	1.12393e+07	1.6388e+07	8.7911e+06	9.25051e+06	5.45776e+06	3.69187e+06	8.01666e+06	1.14839e+07	1.09235e+08	6.44393e+07	-1.75491	0.00352071	-0.982655
P16930	FAH	Fumarylacetoacetase OS=Homo sapiens OX=9606 GN=FAH PE=1 SV=2	67	11	419	1.50863e+08	1.87413e+08	5.11127e+07	5.01275e+07	7.89704e+07	1.67766e+08	1.01775e+08	7.21622e+07	7.25318e+07	1.1598e+08	0	8.22177e+06	5.24335e+06	7.35123e+06	8.47389e+06	1.58877e+07	1.91622e+07	2.75889e+06	7.29791e+07	5.87407e+07	-2.7523	0.000901865	-1.32033
P46952	HAAO	3-hydroxyanthranilate 3,4-dioxygenase OS=Homo sapiens OX=9606 GN=HAAO PE=1 SV=2	67	8	286	6.39366e+07	8.77215e+07	2.60433e+07	2.92217e+07	2.66197e+07	1.03721e+08	4.14979e+07	5.76183e+07	4.55821e+07	5.84208e+07	0	8.1835e+06	0	9.42942e+06	1.34523e+07	0	2.891e+06	2.04093e+06	7.99287e+06	4.48794e+07	-3.46673	0.000901827	-1.67077
Q16134	ETFDH	Electron transfer flavoprotein-ubiquinone oxidoreductase, mitochondrial OS=Homo sapiens OX=9606 GN=ETFDH PE=1 SV=2	67	11	617	5.35939e+07	5.15758e+07	1.60487e+07	4.89365e+07	5.15699e+07	6.30018e+07	5.91301e+07	6.40798e+07	4.33728e+07	5.56607e+07	0	3.05878e+06	3.85524e+06	0	0	0	0	0	2.53601e+07	4.90548e+07	-3.82145	4.3681e-06	-2.26038
P22033	MMUT	Methylmalonyl-CoA mutase, mitochondrial OS=Homo sapiens OX=9606 GN=MMUT PE=1 SV=4	67	14	750	7.77719e+07	7.84256e+07	2.82673e+07	5.20133e+07	4.72669e+07	1.17631e+08	5.23633e+07	6.19052e+07	6.4987e+07	8.66861e+07	0	3.38669e+06	0	1.49261e+06	0	0	0	1.04712e+06	2.45576e+07	6.96646e+07	-4.30025	0.000107208	-2.03474
Q92506	HSD17B8	Estradiol 17-beta-dehydrogenase 8 OS=Homo sapiens OX=9606 GN=HSD17B8 PE=1 SV=2	67	6	261	5.57941e+07	5.73007e+07	1.72657e+07	3.35905e+07	4.29953e+07	8.62091e+07	4.76617e+07	5.48316e+07	4.47862e+07	4.88628e+07	0	0	0	0	0	0	0	0	1.14524e+07	4.62041e+07	-5.26498	0.000100359	-2.3324
P05107	ITGB2	Integrin beta-2 OS=Homo sapiens OX=9606 GN=ITGB2 PE=1 SV=2	66	14	769	3.61544e+07	3.57465e+07	1.44156e+08	7.00949e+07	7.4115e+07	7.41788e+07	5.8359e+07	6.67029e+07	4.39974e+07	4.89544e+07	217678908	1.83134e+08	2.90061e+08	2.23108e+08	255126231	1178546417	425170670	1.24179e+08	8.44347e+07	6.57605e+07	2.34405	0.0754995	0.774858
Q96CX2	KCTD12	BTB/POZ domain-containing protein KCTD12 OS=Homo sapiens OX=9606 GN=KCTD12 PE=1 SV=1	66	8	325	1.50108e+07	6.69609e+06	5.59845e+07	3.15094e+07	2.7386e+07	1.32815e+07	2.44734e+07	2.03807e+07	1.84794e+07	1.81559e+07	5.6134e+07	8.19282e+07	8.94473e+07	9.40315e+07	6.96741e+07	103169864	9.12689e+07	6.65866e+07	3.37933e+07	3.14915e+07	1.72016	7.94331e-05	1.58651
P50552	VASP	Vasodilator-stimulated phosphoprotein OS=Homo sapiens OX=9606 GN=VASP PE=1 SV=3	66	12	380	9.40935e+06	7.8635e+06	1.0152e+08	2.35925e+07	107901357	1.10511e+07	2.27299e+07	1.2373e+07	1.13345e+07	1.02339e+07	3.81603e+07	4.05375e+07	9.05558e+07	4.82125e+07	148265360	1.58602e+08	1.17797e+08	4.52885e+07	4.06194e+07	9.20529e+06	1.34695	0.0507097	0.589223
O14818	PSMA7	Proteasome subunit alpha type-7 OS=Homo sapiens OX=9606 GN=PSMA7 PE=1 SV=1	66	8	248	3.69711e+07	3.86642e+07	2.49932e+07	4.02667e+07	4.34931e+07	2.98974e+07	3.47827e+07	3.12544e+07	3.5782e+07	2.63415e+07	4.11779e+07	4.06465e+07	8.39268e+07	4.15351e+07	4.0243e+07	4.42267e+07	4.52946e+07	4.34406e+07	5.65447e+07	3.16257e+07	0.503877	0.021349	0.750304
Q93052	LPP	Lipoma-preferred partner OS=Homo sapiens OX=9606 GN=LPP PE=1 SV=1	66	11	612	2.77588e+07	2.34616e+07	3.61593e+07	2.96168e+07	4.67015e+06	1.27329e+07	1.98484e+07	2.9596e+07	4.06271e+07	6.85979e+07	1.01175e+08	6.74733e+07	1.44843e+07	3.14035e+07	3.92415e+06	7.76866e+06	1.21722e+07	8.89031e+07	3.93859e+07	4.60789e+07	0.475327	0.487389	0.224107
Q14254	FLOT2	Flotillin-2 OS=Homo sapiens OX=9606 GN=FLOT2 PE=1 SV=2	66	10	428	1.97925e+07	9.10315e+06	4.81455e+07	2.40603e+07	1.66126e+07	1.52983e+07	1.5411e+07	2.53556e+07	2.91825e+07	8.21427e+06	5.21865e+06	3.2627e+07	3.45871e+07	1.77682e+07	0	7.0835e+07	2.45177e+07	1.85071e+07	3.98111e+07	1.32458e+07	0.359682	0.523609	0.19357
Q99733	NAP1L4	Nucleosome assembly protein 1-like 4 OS=Homo sapiens OX=9606 GN=NAP1L4 PE=1 SV=1	66	5	375	2.07567e+07	2.19467e+07	1.95611e+07	2.27716e+07	2.76819e+07	2.15206e+07	2.07237e+07	1.89017e+07	2.06902e+07	1.83472e+07	2.64379e+07	2.59161e+07	2.47863e+07	2.51136e+07	7.79998e+06	1.14422e+07	2.6902e+07	1.88552e+07	2.55309e+07	1.85043e+07	0.00880538	0.965482	0.0141245
O43399	TPD52L2	Tumor protein D54 OS=Homo sapiens OX=9606 GN=TPD52L2 PE=1 SV=2	66	5	206	2.67337e+07	2.8229e+07	2.64179e+07	3.06251e+07	1.81875e+07	3.06933e+07	1.17741e+07	3.29109e+07	2.02686e+07	1.85098e+07	2.1009e+07	1.72008e+07	3.0764e+07	1.25293e+07	1.71576e+07	2.39072e+07	2.88033e+07	2.74799e+07	3.07223e+07	1.18841e+07	-0.0694899	0.76679	-0.0897799
P35611	ADD1	Alpha-adducin OS=Homo sapiens OX=9606 GN=ADD1 PE=1 SV=2	66	13	737	3.35672e+07	3.28216e+07	3.61096e+07	2.95421e+07	3.51889e+07	3.24757e+07	3.93604e+07	3.18922e+07	2.94866e+07	3.25535e+07	3.35461e+07	2.58313e+07	4.67196e+06	3.80635e+07	2.70245e+06	0	0	1.79435e+07	2.14156e+07	3.17963e+07	-1.0557	0.0180256	-1.03193
P07919	UQCRH	Cytochrome b-c1 complex subunit 6, mitochondrial OS=Homo sapiens OX=9606 GN=UQCRH PE=1 SV=2	66	5	91	7.92052e+07	9.95034e+07	5.66349e+07	7.2081e+07	1.13365e+08	8.6809e+07	7.01735e+07	120775676	6.49732e+07	8.33131e+07	1.80299e+07	2.65702e+07	4.01129e+07	9.65914e+06	3.54651e+07	2.6852e+07	3.11332e+07	2.96393e+07	4.27248e+07	7.48609e+07	-1.55053	2.91682e-05	-1.88369
Q15274	QPRT	Nicotinate-nucleotide pyrophosphorylase [carboxylating] OS=Homo sapiens OX=9606 GN=QPRT PE=1 SV=3	66	7	297	1.36684e+08	1.43895e+08	8.39104e+07	7.48441e+07	8.17345e+07	1.11974e+08	9.98012e+07	5.54839e+07	9.70357e+07	1.01312e+08	2.34873e+07	2.17196e+07	1.78354e+07	2.80875e+07	2.64043e+07	1.72304e+07	2.8874e+07	3.55677e+07	4.58775e+07	7.31167e+07	-1.8573	8.54924e-05	-2.08601
P32189	GK	Glycerol kinase OS=Homo sapiens OX=9606 GN=GK PE=1 SV=3	66	16	559	1.09823e+08	122442285	2.5495e+07	5.50884e+07	2.30252e+07	8.95205e+07	1.03796e+08	2.52572e+07	5.31535e+07	6.47744e+07	2.20988e+06	881293	2.13956e+06	1.80583e+06	0	724635	0	0	2.36091e+07	6.14856e+07	-4.2698	0.00156056	-1.49904
P11678	EPX	Eosinophil peroxidase OS=Homo sapiens OX=9606 GN=EPX PE=1 SV=2	65	11	715	321822	643483	6.52546e+06	0	5.95993e+07	1.93879e+06	0	0	0	0	1.02657e+07	9.4559e+07	267594959	5.74864e+07	5.60751e+07	1.5595e+08	1.24277e+07	1.72104e+07	1.30783e+07	2.21309e+06	3.46209	0.077	0.696605
P63220	RPS21	40S ribosomal protein S21 OS=Homo sapiens OX=9606 GN=RPS21 PE=1 SV=1	65	4	83	2.63468e+07	2.82825e+07	4.10264e+07	2.68326e+07	2.61098e+07	2.94847e+07	2.22186e+07	3.09663e+07	2.13794e+07	2.56503e+07	6.54318e+07	5.30562e+07	7.87213e+07	4.61499e+07	8.34668e+07	6.03401e+07	9.68206e+07	6.13014e+07	5.77571e+07	3.05479e+07	1.26764	0.000360574	1.91566
P07814	EPRS1	Bifunctional glutamate/proline--tRNA ligase OS=Homo sapiens OX=9606 GN=EPRS1 PE=1 SV=5	65	13	1512	3.47127e+07	3.17327e+07	4.66051e+07	3.74872e+07	4.60652e+07	2.95799e+07	3.48877e+07	3.08304e+07	4.6802e+07	2.44015e+07	2.72418e+07	3.57037e+07	3.21983e+07	3.83147e+07	1.08935e+08	3.41123e+07	4.34751e+07	3.11483e+07	3.89253e+07	2.77696e+07	0.255295	0.486875	0.226189
P45974	USP5	Ubiquitin carboxyl-terminal hydrolase 5 OS=Homo sapiens OX=9606 GN=USP5 PE=1 SV=2	65	10	858	2.96269e+07	2.49363e+07	3.68914e+07	2.8875e+07	2.79931e+07	2.12096e+07	2.14743e+07	2.67337e+07	2.06729e+07	2.39737e+07	4.77615e+06	2.8488e+07	27433024	2.00092e+07	8.70025e+06	1.63836e+07	1.90487e+07	1.99348e+07	1.99457e+07	2.49724e+07	-0.519682	0.031522	-0.663334
O43301	HSPA12A	Heat shock 70 kDa protein 12A OS=Homo sapiens OX=9606 GN=HSPA12A PE=1 SV=2	65	8	675	3.2711e+07	4.17498e+07	3.36132e+07	3.11104e+07	2.54063e+07	3.87599e+07	4.25814e+07	2.86925e+07	3.58e+07	3.10664e+07	3.64377e+07	3.65016e+07	1.69787e+07	4.11359e+07	5.12515e+06	1.23196e+07	5.08133e+06	3.24472e+07	1.5976e+07	2.615e+07	-0.605466	0.0747008	-0.62579
Q9H8H3	METTL7A	Methyltransferase-like protein 7A OS=Homo sapiens OX=9606 GN=METTL7A PE=1 SV=1	65	6	244	5.70147e+07	8.39467e+07	4.4657e+07	6.18078e+07	5.68475e+07	6.61414e+07	7.75763e+07	9.41976e+07	7.13132e+07	7.88612e+07	4.20634e+07	3.36008e+07	3.3826e+07	3.5585e+07	1.52112e+07	3.41105e+07	4.02252e+07	2.03386e+07	2.59086e+07	6.73093e+07	-1.14963	5.83308e-05	-1.68976
P10153	RNASE2	Non-secretory ribonuclease OS=Homo sapiens OX=9606 GN=RNASE2 PE=1 SV=2	65	3	161	9.9344e+07	1.14516e+08	1.00519e+07	5.84163e+06	6.39175e+07	1.11091e+08	4.93035e+07	1.40236e+08	4.86154e+07	5.56277e+07	0	5.43446e+07	1.20621e+08	1.00603e+07	1.2131e+07	2.12798e+07	1.28207e+07	2.09929e+07	1.53739e+07	3.15532e+07	-1.23214	0.0863582	-0.515123
O43598	DNPH1	2'-deoxynucleoside 5'-phosphate N-hydrolase 1 OS=Homo sapiens OX=9606 GN=DNPH1 PE=1 SV=1	65	6	174	9.97954e+07	1.17486e+08	3.95044e+07	5.24696e+07	5.45294e+07	1.05319e+08	7.31296e+07	6.20382e+07	1.0186e+08	1.08097e+08	1.14713e+07	2.58716e+07	1.79004e+07	1.0555e+07	0	5.92688e+06	1.22858e+06	1.15943e+07	4.38213e+07	9.18835e+07	-2.51313	0.00012523	-1.69899
P80365	HSD11B2	Corticosteroid 11-beta-dehydrogenase isozyme 2 OS=Homo sapiens OX=9606 GN=HSD11B2 PE=1 SV=2	65	7	405	7.04414e+07	3.95319e+07	4.72874e+07	4.36829e+07	3.82259e+07	6.8293e+07	7.19957e+07	5.21326e+07	4.98816e+07	4.92467e+07	3.2538e+06	1.61544e+06	0	3.60534e+06	0	2.79096e+07	0	3.81414e+06	1.18781e+07	5.09345e+07	-3.19724	3.29281e-06	-2.29872
Q1KMD3	HNRNPUL2	Heterogeneous nuclear ribonucleoprotein U-like protein 2 OS=Homo sapiens OX=9606 GN=HNRNPUL2 PE=1 SV=1	64	12	747	2.83712e+07	1.89371e+07	7.72859e+07	3.3293e+07	1.48445e+07	1.7721e+07	2.56937e+07	2.92099e+07	2.58505e+07	1.87783e+07	8.13228e+07	1.40971e+08	1.29694e+08	1.01966e+08	1.17355e+08	9.70464e+07	6.5687e+07	6.16722e+07	4.02119e+07	3.20568e+07	1.6794	0.00118153	1.31325
P38919	EIF4A3	Eukaryotic initiation factor 4A-III OS=Homo sapiens OX=9606 GN=EIF4A3 PE=1 SV=4	64	4	411	4.76385e+06	2.09645e+06	2.87524e+07	1.3351e+07	9.69836e+06	1.32883e+07	3.75765e+06	6.22479e+06	1.16975e+07	1.51847e+06	15707188	2.1077e+07	3.57999e+07	3.18099e+07	4.16396e+07	2.49118e+07	2.24015e+07	2.24591e+07	2.06017e+07	7.14596e+06	1.46502	0.00151978	1.07643
Q15181	PPA1	Inorganic pyrophosphatase OS=Homo sapiens OX=9606 GN=PPA1 PE=1 SV=2	64	5	289	2.69893e+07	2.64211e+07	2.91731e+07	2.28106e+07	2.29092e+07	3.15777e+07	2.02447e+07	2.28857e+07	1.36886e+07	3.0048e+07	2.18768e+07	2.24426e+07	4.10904e+07	2.31415e+07	5.02048e+07	4.08641e+07	2.9615e+07	2.90757e+07	5.15124e+07	2.12933e+07	0.480411	0.0755216	0.603981
P21964	COMT	Catechol O-methyltransferase OS=Homo sapiens OX=9606 GN=COMT PE=1 SV=2	64	7	271	3.10206e+07	1.86229e+07	4.59755e+07	4.14671e+07	6.87034e+07	1.71462e+07	4.1097e+07	6.79478e+07	1.529e+07	2.7298e+07	3.47196e+07	1.77424e+07	5.64854e+07	2.23279e+07	1.63294e+07	4.66414e+07	3.73955e+07	2.09832e+07	2.33123e+07	3.56374e+07	-0.288887	0.475573	-0.214477
Q96HD9	ACY3	N-acyl-aromatic-L-amino acid amidohydrolase (carboxylate-forming) OS=Homo sapiens OX=9606 GN=ACY3 PE=1 SV=1	64	9	319	5.60598e+07	7.45743e+07	3.56316e+07	5.64214e+07	5.84342e+07	1.13361e+08	4.71989e+07	8.17282e+07	7.50287e+07	9.25222e+07	7.32392e+07	5.4088e+07	2.69856e+07	3.45532e+07	4.29689e+07	2.55254e+07	3.9548e+07	4.80361e+07	2.24359e+07	5.80428e+07	-0.759326	0.016703	-0.762431
P09669	COX6C	Cytochrome c oxidase subunit 6C OS=Homo sapiens OX=9606 GN=COX6C PE=1 SV=2	64	5	75	6.51661e+07	5.87205e+07	3.0415e+07	4.41279e+07	6.73744e+07	3.78408e+07	5.90989e+07	6.50934e+07	6.52369e+07	7.04879e+07	9.29018e+06	1.08172e+07	6.87417e+06	1.11044e+07	9.55811e+06	10788497	1.48943e+07	6.88992e+06	4.60236e+07	7.55989e+07	-2.0064	3.665e-05	-1.71367
P24539	ATP5PB	ATP synthase F(0) complex subunit B1, mitochondrial OS=Homo sapiens OX=9606 GN=ATP5PB PE=1 SV=2	64	8	256	8.61522e+07	7.09573e+07	2.49383e+07	6.29128e+07	7.66736e+07	7.12265e+07	1.02047e+08	8.23688e+07	7.926e+07	8.82394e+07	2.07637e+07	1.31489e+07	8.49148e+06	5.58778e+06	0	8.82372e+06	1.90757e+07	1.32014e+07	4.935e+07	8.84196e+07	-2.27552	2.9339e-05	-1.79546
Q16795	NDUFA9	NADH dehydrogenase [ubiquinone] 1 alpha subcomplex subunit 9, mitochondrial OS=Homo sapiens OX=9606 GN=NDUFA9 PE=1 SV=2	64	7	377	5.88512e+07	4.53415e+07	2.13199e+07	4.6217e+07	4.77205e+07	5.31793e+07	5.45138e+07	6.05144e+07	6.80571e+07	6.29856e+07	3.00182e+06	9.65985e+06	2.70651e+06	2.47743e+06	0	0	0	3.41024e+06	1.49718e+07	4.85167e+07	-3.68773	1.34648e-06	-2.78128
Q86XE5	HOGA1	4-hydroxy-2-oxoglutarate aldolase, mitochondrial OS=Homo sapiens OX=9606 GN=HOGA1 PE=1 SV=1	64	7	327	1.55743e+08	1.61201e+08	4.09953e+07	7.44004e+07	1.33078e+08	2.09265e+08	1.2203e+08	1.63623e+08	1.0611e+08	1.64458e+08	0	2.30656e+06	0	0	0	8.35576e+06	0	0	2.87521e+07	1.66985e+08	-4.92554	0.000124238	-2.3112
P62913	RPL11	60S ribosomal protein L11 OS=Homo sapiens OX=9606 GN=RPL11 PE=1 SV=2	63	4	178	1.88487e+07	1.98328e+07	3.88525e+07	2.1926e+07	2.21122e+07	2.74827e+07	2.05986e+07	2.95404e+07	2.21517e+07	2.29486e+07	5.65768e+07	5.32554e+07	7.4298e+07	4.35048e+07	5.62726e+07	7.08934e+07	8.05915e+07	5.8506e+07	4.61594e+07	2.71308e+07	1.2965	9.81173e-05	2.01178
P62277	RPS13	40S ribosomal protein S13 OS=Homo sapiens OX=9606 GN=RPS13 PE=1 SV=2	63	6	151	2.37361e+07	1.65501e+07	3.05401e+07	2.04961e+07	1.96819e+07	2.5787e+07	2.45025e+07	2.96309e+07	1.80433e+07	1.55952e+07	3.70718e+07	4.85485e+07	4.41609e+07	4.86982e+07	6.01839e+07	5.20531e+07	7.85726e+07	5.08357e+07	4.26338e+07	2.62699e+07	1.19514	4.22302e-05	1.77129
Q01130	SRSF2	Serine/arginine-rich splicing factor 2 OS=Homo sapiens OX=9606 GN=SRSF2 PE=1 SV=4	63	5	221	3.37829e+07	3.22406e+07	7.28558e+07	3.02623e+07	2.85414e+07	3.4489e+07	3.18878e+07	3.98268e+07	3.14613e+07	2.88897e+07	7.2308e+07	7.78377e+07	9.16773e+07	8.79729e+07	1.091e+08	5.00396e+07	6.08494e+07	7.83524e+07	5.54639e+07	4.12259e+07	1.06028	0.000385158	1.30611
P62829	RPL23	60S ribosomal protein L23 OS=Homo sapiens OX=9606 GN=RPL23 PE=1 SV=1	63	6	140	2.43647e+07	1.72302e+07	3.60435e+07	2.51328e+07	2.39969e+07	2.02269e+07	2.2592e+07	3.1862e+07	2.65839e+07	2.94939e+07	5.8259e+07	5.74363e+07	5.46779e+07	4.52377e+07	1.85748e+07	3.97709e+07	6.40488e+07	6.13002e+07	4.89866e+07	2.97567e+07	0.95172	0.000624962	1.2981
P67775	PPP2CA	Serine/threonine-protein phosphatase 2A catalytic subunit alpha isoform OS=Homo sapiens OX=9606 GN=PPP2CA PE=1 SV=1	63	6	309	1.83977e+07	2.67359e+07	2.64393e+07	2.72842e+07	2.00335e+07	1.96838e+07	1.80517e+07	3.05556e+07	2.36911e+07	2.34793e+07	4.23687e+07	3.05046e+07	5.94641e+07	4.1013e+07	4.26045e+07	3.46248e+07	2.62417e+07	2.92844e+07	3.36298e+07	2.48309e+07	0.687737	0.00267338	1.05575
P08754	GNAI3	Guanine nucleotide-binding protein G(i) subunit alpha OS=Homo sapiens OX=9606 GN=GNAI3 PE=1 SV=3	63	2	354	6.51345e+06	4.6898e+06	8.60055e+06	8.16568e+06	8.35027e+06	7.16586e+06	1.01743e+07	7.89259e+06	7.74119e+06	5.53126e+06	5.96747e+06	9.22865e+06	6.0146e+06	7.25283e+06	0	1.29413e+07	1.06558e+07	4.77996e+06	1.02473e+07	8.94495e+06	-0.00546339	0.98592	-0.00551365
P00492	HPRT1	Hypoxanthine-guanine phosphoribosyltransferase OS=Homo sapiens OX=9606 GN=HPRT1 PE=1 SV=2	63	5	218	2.07534e+07	2.07531e+07	3.29593e+07	2.99297e+07	4.46554e+07	4.93237e+07	2.24185e+07	2.04303e+07	2.0183e+07	1.96453e+07	2.84854e+07	2.55166e+07	3.74508e+07	1.93364e+07	2.72128e+07	1.8927e+07	2.48511e+07	2.17793e+07	2.31757e+07	1.7035e+07	-0.157825	0.548033	-0.185096
P56199	ITGA1	Integrin alpha-1 OS=Homo sapiens OX=9606 GN=ITGA1 PE=1 SV=2	63	12	1179	2.19556e+07	1.89392e+07	1.92996e+07	2.50462e+07	1.47099e+07	1.69232e+07	3.23187e+07	3.04211e+07	29813062	2.61995e+07	3.56699e+07	4.61125e+07	5.35083e+06	4.13102e+07	0	0	0	2.76754e+07	1.6328e+07	1.77022e+07	-0.298344	0.59251	-0.186249
P36873	PPP1CC	Serine/threonine-protein phosphatase PP1-gamma catalytic subunit OS=Homo sapiens OX=9606 GN=PPP1CC PE=1 SV=1	63	1	323	5.02992e+06	3.53265e+06	5.90364e+06	4.88706e+06	7.05253e+06	4.43965e+06	4.87782e+06	3.64837e+06	5.08507e+06	3.55445e+06	4.62312e+06	3.37917e+06	3.58611e+06	2.90999e+06	4.7591e+06	2.75079e+06	2.83847e+06	0	0	4.7986e+06	-0.798309	0.0155683	-0.76206
Q9UBI6	GNG12	Guanine nucleotide-binding protein G(I)/G(S)/G(O) subunit gamma-12 OS=Homo sapiens OX=9606 GN=GNG12 PE=1 SV=3	63	6	72	4.02328e+07	4.3639e+07	4.39861e+07	4.41752e+07	5.30935e+07	4.36368e+07	3.2389e+07	3.95426e+07	3.95729e+07	3.62163e+07	4.7689e+07	3.25018e+07	1.31228e+07	3.44335e+07	9.9321e+06	2.53789e+06	3.59827e+06	1.9551e+07	3.58431e+07	2.797e+07	-0.911972	0.0152943	-0.956343
Q9UHG3	PCYOX1	Prenylcysteine oxidase 1 OS=Homo sapiens OX=9606 GN=PCYOX1 PE=1 SV=3	63	6	505	5.6136e+07	5.27373e+07	30979262	3.204e+07	2.81774e+07	4.47913e+07	4.41353e+07	3.77272e+07	4.42676e+07	4.54204e+07	3.86781e+07	3.25891e+07	1.81054e+07	3.58438e+07	7.81292e+06	4.23966e+06	1.94621e+06	1.8547e+07	2.46018e+07	3.9044e+07	-1.03919	0.00313458	-0.983634
P63096	GNAI1	Guanine nucleotide-binding protein G(i) subunit alpha-1 OS=Homo sapiens OX=9606 GN=GNAI1 PE=1 SV=2	63	4	354	6.05799e+06	5.30594e+06	9.58442e+06	1.53336e+07	1.91712e+07	4.36425e+06	1.1292e+07	1.95222e+07	1.66129e+07	6.29533e+06	1.58602e+07	1.0393e+07	0	9.4905e+06	0	0	0	5.11767e+06	4.43495e+06	9.6857e+06	-1.17373	0.0570589	-0.571971
Q13621	SLC12A1	Solute carrier family 12 member 1 OS=Homo sapiens OX=9606 GN=SLC12A1 PE=1 SV=2	63	12	1099	4.64404e+07	2.8351e+07	3.65323e+07	3.85782e+07	9.7697e+07	2.94262e+07	3.98746e+07	111624656	5.88177e+07	4.06643e+07	0	4.95385e+07	1.93609e+07	2.22104e+06	0	0	0	0	0	4.97807e+07	-2.74022	0.0028114	-1.0385
Q9UHK6	AMACR	Alpha-methylacyl-CoA racemase OS=Homo sapiens OX=9606 GN=AMACR PE=1 SV=2	63	8	382	5.0381e+07	4.12378e+07	2.12783e+07	9.38895e+07	2.23734e+07	8.94469e+07	4.46405e+07	4.69144e+07	4.23652e+07	3.81992e+07	0	0	0	0	0	0	1.79489e+06	0	5.97008e+07	6.39124e+07	-2.84436	0.00269365	-1.00851
P52758	RIDA	2-iminobutanoate/2-iminopropanoate deaminase OS=Homo sapiens OX=9606 GN=RIDA PE=1 SV=1	63	9	137	3.35983e+08	5.15037e+08	8.5435e+07	146258017	1.32864e+08	356712073	2.70528e+08	1.58007e+08	1.64373e+08	2.53216e+08	0	7.34675e+06	0	0	0	0	0	1.46923e+06	6.69766e+07	1.55226e+08	-4.84386	0.00129422	-1.6011
Q9UL46	PSME2	Proteasome activator complex subunit 2 OS=Homo sapiens OX=9606 GN=PSME2 PE=1 SV=4	62	7	239	1.95171e+07	1.82003e+07	2.08437e+07	2.28147e+07	2.39456e+07	1.79938e+07	1.44417e+07	1.34877e+07	1.84203e+07	1.07301e+07	2.1437e+07	4.02371e+07	6.3301e+07	3.24374e+07	3.74912e+07	7.26539e+07	6.47147e+07	4.08725e+07	4.81221e+07	2.50365e+07	1.37558	0.00284583	1.44958
P46782	RPS5	40S ribosomal protein S5 OS=Homo sapiens OX=9606 GN=RPS5 PE=1 SV=4	62	5	204	2.16011e+07	1.89616e+07	4.5095e+07	2.59063e+07	3.11765e+07	2.79984e+07	1.93675e+07	1.8657e+07	1.74663e+07	2.035e+07	3.64363e+07	4.53195e+07	5.66386e+07	4.56645e+07	1.05067e+08	8.2549e+07	9.1124e+07	4.21941e+07	4.02395e+07	2.57789e+07	1.29682	0.00735148	1.11934
O75131	CPNE3	Copine-3 OS=Homo sapiens OX=9606 GN=CPNE3 PE=1 SV=1	62	4	537	3.37091e+07	2.91715e+07	3.44721e+07	3.02246e+07	2.45304e+07	3.21096e+07	2.37525e+07	3.1069e+07	2.34431e+07	2.70698e+07	1.84447e+07	3.44336e+07	3.10009e+07	4.20513e+07	4.36701e+07	1.3767e+08	4.06769e+07	2.04621e+07	1.8399e+07	2.82802e+07	0.569803	0.318931	0.362607
P61019	RAB2A	Ras-related protein Rab-2A OS=Homo sapiens OX=9606 GN=RAB2A PE=1 SV=1	62	6	212	1.98409e+07	2.02711e+07	2.57844e+07	2.55177e+07	2.85856e+07	2.4059e+07	1.9307e+07	2.59544e+07	2.3461e+07	2.243e+07	2.87077e+07	1.80485e+07	3.23631e+07	2.12218e+07	1.29548e+07	4.26678e+07	2.88189e+07	2.84429e+07	1.968e+07	22406045	0.137793	0.543855	0.208566
Q9UNZ2	NSFL1C	NSFL1 cofactor p47 OS=Homo sapiens OX=9606 GN=NSFL1C PE=1 SV=2	62	8	370	1.85731e+07	2.79097e+07	3.1446e+07	2.39272e+07	2.31025e+07	1.11796e+07	1.34741e+07	1.07107e+07	2.22345e+07	1.91749e+07	2.0267e+07	2.61511e+07	2.59325e+07	1.66949e+07	1.30071e+07	9.25516e+06	1.45488e+07	2.27812e+07	2.19667e+07	2.61826e+07	-0.0897827	0.739515	-0.10014
Q04760	GLO1	Lactoylglutathione lyase OS=Homo sapiens OX=9606 GN=GLO1 PE=1 SV=4	62	5	184	3.53225e+07	4.17491e+07	3.69026e+07	2.44434e+07	2.18676e+07	2.84399e+07	3.66752e+07	3.0543e+07	3.0318e+07	3.09446e+07	4.18567e+07	2.95091e+07	2.65874e+07	2.89514e+07	0	3.40179e+06	4.2003e+06	2.77713e+07	2.09769e+07	2.75995e+07	-0.639565	0.0882491	-0.585747
P08237	PFKM	ATP-dependent 6-phosphofructokinase, muscle type OS=Homo sapiens OX=9606 GN=PFKM PE=1 SV=2	62	8	780	4.87456e+07	46014238	18477240	3.88563e+07	2.56264e+07	3.19288e+07	3.78754e+07	5.14093e+07	3.96217e+07	4.53861e+07	8.38856e+06	1.84844e+07	9.93974e+06	1.59531e+07	1.33905e+07	1.49105e+07	2.07719e+06	6.11175e+06	1.94016e+07	4.07073e+07	-1.6691	5.89367e-05	-1.70421
Q9Y6R1	SLC4A4	Electrogenic sodium bicarbonate cotransporter 1 OS=Homo sapiens OX=9606 GN=SLC4A4 PE=1 SV=1	62	6	1079	6.25229e+07	7.86697e+07	1.36175e+07	6.04055e+07	2.10204e+07	6.26726e+07	7.89299e+07	1.67047e+07	4.75921e+07	6.2487e+07	0	1.23545e+06	6.04933e+06	0	0	0	2.27268e+06	0	7.00649e+07	4.39712e+07	-2.51196	0.00474619	-0.920445
Q9H2A2	ALDH8A1	2-aminomuconic semialdehyde dehydrogenase OS=Homo sapiens OX=9606 GN=ALDH8A1 PE=1 SV=1	62	10	487	3.53125e+07	5.56959e+07	1.51564e+07	3.30463e+07	2.97965e+07	3.78755e+07	5.56744e+07	3.49164e+07	3.81961e+07	4.45161e+07	0	1.88524e+06	0	0	1.08366e+07	1.71473e+07	2.57607e+06	0	2.30986e+07	3.73475e+07	-2.623	7.03837e-05	-1.62122
Q01740	FMO1	Dimethylaniline monooxygenase [N-oxide-forming] 1 OS=Homo sapiens OX=9606 GN=FMO1 PE=1 SV=3	62	9	532	7.47236e+07	8.0047e+07	5.47684e+07	2.13326e+07	3.68104e+07	7.7709e+07	6.67527e+07	3.05819e+07	6.05449e+07	5.95072e+07	0	0	0	0	2.30444e+07	0	0	0	2.02824e+07	5.88085e+07	-3.54723	8.6897e-05	-1.80988
P42167	TMPO	Lamina-associated polypeptide 2, isoforms beta/gamma OS=Homo sapiens OX=9606 GN=TMPO PE=1 SV=2	61	9	454	1.40065e+07	8.43194e+06	4.20238e+07	1.26756e+07	9.60802e+06	9.86723e+06	2.21177e+07	2.21913e+07	2.0684e+07	1.35809e+07	4.52095e+07	5.12138e+07	5.53983e+07	7.04452e+07	2.19207e+07	3.4868e+07	1.81281e+07	5.62871e+07	2.50508e+07	2.8395e+07	1.26348	0.00934656	0.925125
P62851	RPS25	40S ribosomal protein S25 OS=Homo sapiens OX=9606 GN=RPS25 PE=1 SV=1	61	5	125	2.89748e+07	1.62911e+07	5.67667e+07	3.55937e+07	2.93669e+07	3.389e+07	3.48649e+07	3.61828e+07	3.25613e+07	2.72392e+07	5.31724e+07	7.96162e+07	6.56346e+07	6.87744e+07	1.28656e+08	9.55617e+07	7.95615e+07	8.41718e+07	4.34537e+07	3.49175e+07	1.22646	0.000472138	1.34219
P84103	SRSF3	Serine/arginine-rich splicing factor 3 OS=Homo sapiens OX=9606 GN=SRSF3 PE=1 SV=1	61	3	164	3.73714e+07	2.95954e+07	8.53636e+07	4.11837e+07	3.82572e+07	4.86304e+07	4.09475e+07	4.11692e+07	3.66934e+07	3.47355e+07	1.07629e+08	8.82144e+07	1.07486e+08	8.68863e+07	1.50001e+08	7.25493e+07	7.05451e+07	7.69996e+07	6.46504e+07	4.52888e+07	1.07881	0.00076141	1.20907
Q9UBR2	CTSZ	Cathepsin Z OS=Homo sapiens OX=9606 GN=CTSZ PE=1 SV=1	61	6	303	7.26304e+07	6.62041e+07	3.15149e+07	5.77668e+07	7.49928e+07	6.55971e+07	1.13191e+08	2.66767e+07	2.23601e+07	6.49194e+07	3.13799e+07	3.93059e+07	9.54257e+07	2.91694e+07	1.4135e+08	1.9179e+08	2.55924e+08	5.62159e+07	1.12414e+08	6.44466e+07	0.829485	0.181892	0.46277
P22061	PCMT1	Protein-L-isoaspartate(D-aspartate) O-methyltransferase OS=Homo sapiens OX=9606 GN=PCMT1 PE=1 SV=4	61	7	227	3.29932e+07	2.49201e+07	3.41133e+07	2.47678e+07	3.54559e+07	2.43141e+07	3.15706e+07	1.54892e+07	1.80196e+07	2.75084e+07	2.96191e+07	5.50203e+07	4.75415e+07	3.29426e+07	1.53053e+07	7.10411e+07	2.97592e+07	2.17673e+07	2.68902e+07	2.12458e+07	0.445551	0.213049	0.420996
Q13576	IQGAP2	Ras GTPase-activating-like protein IQGAP2 OS=Homo sapiens OX=9606 GN=IQGAP2 PE=1 SV=4	61	16	1575	3.72844e+07	3.49776e+07	1.70154e+07	2.45361e+07	1.61088e+07	4.12626e+07	3.83855e+07	2.39674e+07	2.66938e+07	3.9262e+07	2.54017e+07	2.49179e+07	1.33793e+07	1.54472e+07	1.4647e+07	2.73538e+07	2.30279e+07	2.25056e+07	2.45273e+07	3.48744e+07	-0.495381	0.0469899	-0.625505
Q07075	ENPEP	Glutamyl aminopeptidase OS=Homo sapiens OX=9606 GN=ENPEP PE=1 SV=3	61	13	957	6.10977e+07	8.1187e+07	2.77714e+07	7.16986e+07	4.4507e+07	3.42103e+07	7.28128e+07	1.34974e+07	3.15535e+07	4.53117e+07	2.4753e+07	1.95994e+07	0	1.49679e+07	7.26032e+06	5.68985e+06	3.78422e+06	2.43884e+07	2.38309e+07	2.00067e+07	-1.80843	0.00270001	-1.13255
Q9UIJ7	AK3	GTP:AMP phosphotransferase AK3, mitochondrial OS=Homo sapiens OX=9606 GN=AK3 PE=1 SV=4	61	9	227	8.18829e+07	7.64754e+07	3.41327e+07	4.66077e+07	5.48025e+07	8.8554e+07	6.80015e+07	1.07382e+08	6.55215e+07	6.12327e+07	3.02671e+07	1.62229e+07	2.42187e+07	1.08706e+07	0	1.63066e+07	2.11497e+07	1.27915e+07	3.42922e+07	5.81482e+07	-1.89102	8.4193e-05	-1.66666
Q9Y6M9	NDUFB9	NADH dehydrogenase [ubiquinone] 1 beta subcomplex subunit 9 OS=Homo sapiens OX=9606 GN=NDUFB9 PE=1 SV=3	61	5	179	4.79162e+07	4.86592e+07	3.6153e+07	48386984	7.24157e+07	5.16207e+07	4.0993e+07	6.80723e+07	4.6815e+07	5.11245e+07	9.78008e+06	2.38613e+06	7.2654e+06	4.14919e+06	1.24268e+07	8.96973e+06	1.26166e+07	1.08702e+07	1.28558e+07	4.92597e+07	-2.5029	9.51047e-07	-2.99247
Q9UJ68	MSRA	Mitochondrial peptide methionine sulfoxide reductase OS=Homo sapiens OX=9606 GN=MSRA PE=1 SV=1	61	8	235	8.62464e+07	1.10938e+08	1.14406e+07	4.2156e+07	3.17857e+07	9.37797e+07	6.56647e+07	4.13549e+07	5.9546e+07	8.66411e+07	0	6.0173e+06	2.51282e+06	0	0	2.20615e+06	0	0	1.72191e+07	6.51661e+07	-4.34113	0.000867327	-1.70141
Q02928	CYP4A11	Cytochrome P450 4A11 OS=Homo sapiens OX=9606 GN=CYP4A11 PE=1 SV=1	61	8	519	6.71738e+07	6.64586e+07	5.35019e+06	1.73628e+07	1.85629e+07	2.27682e+08	4.52445e+07	1.24233e+08	6.22073e+07	8.73163e+07	0	0	0	0	0	0	0	0	7.92089e+06	7.53147e+07	-6.35737	0.0170383	-1.10656
P15121	AKR1B1	Aldo-keto reductase family 1 member B1 OS=Homo sapiens OX=9606 GN=AKR1B1 PE=1 SV=3	60	5	316	3.00257e+07	3.14613e+07	5.59674e+07	4.86129e+07	7.10488e+07	4.3657e+07	3.95437e+07	4.91244e+07	2.62258e+07	1.82369e+07	1.36124e+08	3.79012e+07	5.83428e+07	6.8651e+07	3.70708e+08	1.27624e+08	2.04758e+08	6.61486e+07	5.41487e+07	2.75074e+07	1.5938	0.0803656	0.725455
P49755	TMED10	Transmembrane emp24 domain-containing protein 10 OS=Homo sapiens OX=9606 GN=TMED10 PE=1 SV=2	60	5	219	2.07808e+07	1.5708e+07	3.43009e+07	3.78927e+07	9.6849e+06	1.59289e+07	1.87199e+07	1.9124e+07	1.73312e+07	1.79423e+07	6.78289e+07	4.91437e+07	4.18473e+07	4.34265e+07	4.03043e+07	108378594	6.40667e+07	5.123e+07	3.4847e+07	2.1658e+07	1.42451	0.00124192	1.185
O00339	MATN2	Matrilin-2 OS=Homo sapiens OX=9606 GN=MATN2 PE=1 SV=4	60	12	956	9.33312e+06	1.185e+06	9.09328e+07	2.47905e+07	1.39517e+07	1.19193e+07	1.09472e+07	3.05566e+07	1.5106e+07	1.52861e+07	1.24933e+08	8.82537e+07	3.13937e+07	1.34801e+08	4.63892e+07	5.14417e+06	0	6.06826e+07	9.7e+06	2.12225e+07	1.31412	0.152727	0.462983
P25398	RPS12	40S ribosomal protein S12 OS=Homo sapiens OX=9606 GN=RPS12 PE=1 SV=3	60	5	132	2.5322e+07	1.91513e+07	3.44967e+07	2.28366e+07	2.31802e+07	1.42992e+07	1.58833e+07	1.24765e+07	1.94718e+07	2.01101e+07	4.34973e+07	4.59796e+07	5.08173e+07	3.20385e+07	5.29282e+07	5.51844e+07	7.05452e+07	4.2425e+07	3.07229e+07	2.17143e+07	1.18532	0.000137309	1.50834
P62195	PSMC5	26S proteasome regulatory subunit 8 OS=Homo sapiens OX=9606 GN=PSMC5 PE=1 SV=1	60	9	406	1.71173e+07	2.05559e+07	1.64092e+07	2.33185e+07	1.9506e+07	1.49444e+07	1.71666e+07	1.80301e+07	1.42492e+07	1.62728e+07	1.49885e+07	1.74079e+07	3.38511e+07	2.43779e+07	2.24907e+07	2.78042e+07	2.90791e+07	2.07646e+07	2.67021e+07	1.7973e+07	0.444406	0.0275893	0.78281
P19652	ORM2	Alpha-1-acid glycoprotein 2 OS=Homo sapiens OX=9606 GN=ORM2 PE=1 SV=2	60	2	201	9.0587e+06	1.53208e+07	2.38725e+06	759154	2.31419e+07	6.25462e+06	7.12865e+06	7.01588e+06	1.0606e+08	2.20766e+07	1.84599e+07	1.42436e+07	1.14214e+07	3.95245e+07	4.86196e+06	3.63548e+07	3.46734e+07	3.46758e+07	7.24008e+06	3.16895e+06	0.16822	0.858947	0.0577732
O60749	SNX2	Sorting nexin-2 OS=Homo sapiens OX=9606 GN=SNX2 PE=1 SV=2	60	8	519	4.2871e+07	3.76078e+07	4.17006e+07	4.87246e+07	3.37711e+07	3.64622e+07	4.54279e+07	2.9838e+07	4.32001e+07	3.67661e+07	3.13545e+07	4.29674e+07	2.02649e+07	2.94568e+07	2.38554e+07	3.13693e+07	3.11873e+07	4.12906e+07	5.75133e+07	4.07507e+07	-0.206024	0.278702	-0.327902
P30711	GSTT1	Glutathione S-transferase theta-1 OS=Homo sapiens OX=9606 GN=GSTT1 PE=1 SV=4	60	8	240	9.38417e+07	3.39223e+07	3.40025e+07	2.60845e+07	2.46943e+07	3.36866e+07	4.34771e+07	1.13269e+06	3.48618e+07	0	0	3.72986e+07	4.17615e+06	3.4281e+06	6.77477e+06	4.49542e+06	2.74484e+06	6.71829e+06	1.35139e+07	2.64636e+07	-1.88889	0.0419593	-0.674583
Q9H6R3	ACSS3	Acyl-CoA synthetase short-chain family member 3, mitochondrial OS=Homo sapiens OX=9606 GN=ACSS3 PE=1 SV=1	60	10	686	4.96524e+07	3.83388e+07	6.26228e+06	3.24871e+07	8.17952e+06	4.04894e+07	4.03738e+07	4.12572e+07	4.51049e+07	4.34636e+07	0	1.12922e+06	0	2.64741e+06	5.91331e+06	0	0	1.61649e+06	5.41835e+06	3.80445e+07	-4.21708	0.000432072	-1.9792
Q86UX7	FERMT3	Fermitin family homolog 3 OS=Homo sapiens OX=9606 GN=FERMT3 PE=1 SV=1	59	13	667	5.09994e+06	1.51792e+06	2.45939e+07	7.14558e+06	1.7774e+06	4.54077e+06	5.94918e+06	0	1.66433e+07	6.06949e+06	1.98726e+07	5.5391e+07	1.30139e+08	6.67363e+07	7.46756e+07	3.52829e+08	1.40302e+08	5.88199e+07	6.08972e+07	2.15913e+07	3.86191	0.0352859	0.981578
P50453	SERPINB9	Serpin B9 OS=Homo sapiens OX=9606 GN=SERPINB9 PE=1 SV=1	59	7	376	4.77515e+06	3.96208e+06	2.9679e+07	1.36676e+07	1.47661e+07	1.09694e+07	2.05588e+06	1.01028e+07	1.173e+07	7.88603e+06	1.76936e+07	6.27973e+07	9.47497e+07	4.53409e+07	8.07516e+07	4.60184e+07	4.20475e+07	4.42987e+07	1.05212e+07	1.16886e+07	2.1711	0.00714854	1.16731
P46777	RPL5	60S ribosomal protein L5 OS=Homo sapiens OX=9606 GN=RPL5 PE=1 SV=3	59	8	297	2.1301e+07	1.5257e+07	3.98219e+07	2.67598e+07	2.17519e+07	2.15756e+07	2.96185e+07	2.06937e+07	2.07407e+07	1.60938e+07	3.63351e+07	5.26507e+07	4.86858e+07	4.65495e+07	4.80844e+07	8.04579e+07	9.54851e+07	4.28877e+07	4.81655e+07	2.73587e+07	1.24779	0.00300708	1.28238
P50914	RPL14	60S ribosomal protein L14 OS=Homo sapiens OX=9606 GN=RPL14 PE=1 SV=4	59	3	215	1.96476e+07	1.50253e+07	3.93501e+07	2.55576e+07	2.79007e+07	2.82843e+07	2.08983e+07	2.85357e+07	2.22176e+07	2.06735e+07	4.19576e+07	4.60948e+07	4.83798e+07	4.24765e+07	7.45919e+07	7.39626e+07	8.84275e+07	5.35871e+07	3.78884e+07	2.5169e+07	1.18416	0.00215544	1.35152
P61224	RAP1B	Ras-related protein Rap-1b OS=Homo sapiens OX=9606 GN=RAP1B PE=1 SV=1	59	2	184	2.58138e+07	2.59071e+07	4.40758e+07	2.24668e+07	2.87808e+07	2.25404e+07	3.88472e+07	3.47224e+07	4.08837e+07	3.43277e+07	4.76644e+07	6.86479e+07	6.69072e+07	5.36631e+07	4.93299e+07	7.69943e+07	6.46068e+07	50683216	5.45734e+07	3.37268e+07	0.895644	6.74752e-05	1.59875
P31942	HNRNPH3	Heterogeneous nuclear ribonucleoprotein H3 OS=Homo sapiens OX=9606 GN=HNRNPH3 PE=1 SV=2	59	7	346	2.608e+07	2.6723e+07	4.57244e+07	3.24844e+07	2.77892e+07	3.1517e+07	2.80219e+07	3.3401e+07	2.91511e+07	2.02201e+07	5.86199e+07	5.20286e+07	5.11385e+07	6.63242e+07	6.06705e+07	5.68677e+07	3.83508e+07	5.30375e+07	5.00565e+07	3.08961e+07	0.845904	2.9339e-05	1.7449
P06703	S100A6	Protein S100-A6 OS=Homo sapiens OX=9606 GN=S100A6 PE=1 SV=1	59	7	90	2.46652e+08	2.95025e+08	4.75585e+08	2.97258e+08	400560141	2.40938e+08	2.52054e+08	287794643	2.07899e+08	2.40717e+08	4.83719e+08	4.23249e+08	6.31401e+08	4.8498e+08	4.42374e+08	5.19634e+08	616639519	4.50906e+08	2.93233e+08	2.57298e+08	0.713722	0.00150156	1.07872
P54727	RAD23B	UV excision repair protein RAD23 homolog B OS=Homo sapiens OX=9606 GN=RAD23B PE=1 SV=1	59	5	409	2.90253e+07	4.34542e+07	2.75857e+07	2.64964e+07	3.66732e+07	2.70099e+07	2.45952e+07	1.79368e+07	2.26597e+07	2.3495e+07	4.0502e+07	3.27453e+07	5.65996e+07	3.23123e+07	2.69385e+07	2.34686e+07	3.62745e+07	2.79356e+07	2.23942e+07	2.24174e+07	0.253062	0.281352	0.316991
P43155	CRAT	Carnitine O-acetyltransferase OS=Homo sapiens OX=9606 GN=CRAT PE=1 SV=5	59	12	626	6.65138e+07	5.90779e+07	1.39043e+07	4.56082e+07	5.18314e+07	1.03094e+08	6.5094e+07	4.37318e+07	4.43297e+07	6.3587e+07	3.36162e+06	2.55636e+06	5.42603e+06	2.4995e+06	9.08e+07	4.54477e+07	2.87592e+08	5.65e+06	2.11143e+07	4.58053e+07	-0.10957	0.914892	-0.037181
P07686	HEXB	Beta-hexosaminidase subunit beta OS=Homo sapiens OX=9606 GN=HEXB PE=1 SV=3	59	13	556	3.18763e+07	4.60172e+07	3.58316e+07	1.04937e+08	4.81808e+07	3.26077e+07	2.6966e+07	3.34417e+07	2.54675e+07	2.14145e+07	5.949e+07	1.77557e+07	2.62973e+07	2.43746e+07	0	3.53993e+07	3.62637e+07	3.32455e+07	105717337	3.09142e+07	-0.112766	0.842759	-0.0596758
Q03591	CFHR1	Complement factor H-related protein 1 OS=Homo sapiens OX=9606 GN=CFHR1 PE=1 SV=2	59	2	330	1.45176e+07	1.86641e+07	0	7.04562e+06	5.76484e+07	1.23195e+07	2.75486e+07	1.91747e+07	3.08628e+07	9.43515e+06	1.21905e+07	6.74524e+06	2.93229e+07	6.3653e+06	1.60166e+07	16249960	0	5.58506e+07	1.11974e+07	1.08803e+07	-0.205421	0.778658	-0.0841591
Q9Y5X3	SNX5	Sorting nexin-5 OS=Homo sapiens OX=9606 GN=SNX5 PE=1 SV=1	59	10	404	4.1344e+07	5.29184e+07	4.21852e+07	5.15122e+07	5.28181e+07	5.44762e+07	3.32455e+07	2.87937e+07	2.91039e+07	3.83816e+07	2.2419e+07	2.99437e+07	2.95288e+07	2.55664e+07	4.40713e+07	1.97147e+07	3.04257e+07	2.03253e+07	3.39606e+07	3.29306e+07	-0.578816	0.00935081	-0.837556
P20742	PZP	Pregnancy zone protein OS=Homo sapiens OX=9606 GN=PZP PE=1 SV=4	59	4	1482	0	2.99071e+06	0	4.51872e+06	5.32753e+07	8.42786e+06	5.99674e+06	8.14949e+06	1.08856e+07	1.38535e+06	0	0	0	0	7.47152e+06	2.22934e+06	3.80089e+06	1.36061e+07	0	0	-1.66675	0.320157	-0.336882
Q96BW5	PTER	Phosphotriesterase-related protein OS=Homo sapiens OX=9606 GN=PTER PE=1 SV=1	59	9	349	4.5408e+07	4.58203e+07	5.61874e+07	3.30852e+07	5.11281e+07	5.39493e+07	6.90645e+07	5.82572e+07	7.01173e+07	3.72159e+07	0	973597	0	0	0	0	0	0	2.01708e+07	8.33555e+07	-4.46881	9.51047e-07	-2.77847
Q9UKU7	ACAD8	Isobutyryl-CoA dehydrogenase, mitochondrial OS=Homo sapiens OX=9606 GN=ACAD8 PE=1 SV=1	59	11	415	4.01459e+07	3.2992e+07	7.10213e+06	3.45492e+07	3.72612e+07	6.1657e+07	4.10837e+07	3.35226e+07	2.517e+07	2.60331e+07	0	992146	2.39968e+06	0	0	0	0	1.30969e+06	8.44201e+06	4.09396e+07	-4.53905	4.31948e-05	-2.06344
P10643	C7	Complement component C7 OS=Homo sapiens OX=9606 GN=C7 PE=1 SV=2	58	14	843	9.95853e+06	6.25349e+06	3.36039e+07	1.40158e+07	8.64089e+06	6.90172e+06	1.98791e+07	2.46996e+07	1.06586e+07	4.94189e+06	4.34365e+07	2.83125e+07	3.14938e+07	2.51228e+07	1.78805e+07	2.94374e+07	6.90787e+06	5.01953e+07	3.776e+07	2.487e+07	1.10706	0.0149664	0.76234
Q16629	SRSF7	Serine/arginine-rich splicing factor 7 OS=Homo sapiens OX=9606 GN=SRSF7 PE=1 SV=1	58	4	238	2.22234e+07	1.52112e+07	5.21751e+07	2.62749e+07	2.60411e+07	3.20408e+07	3.19799e+07	3.39452e+07	2.65525e+07	2.68871e+07	6.88562e+07	7.13229e+07	7.64259e+07	7.90126e+07	5.63318e+07	3.25317e+07	5.36642e+07	5.6883e+07	4.99152e+07	4.07535e+07	1.04558	0.000306222	1.3493
P62995	TRA2B	Transformer-2 protein homolog beta OS=Homo sapiens OX=9606 GN=TRA2B PE=1 SV=1	58	4	288	1.34712e+07	1.62144e+07	3.69061e+07	1.39896e+07	1.60388e+07	1.81723e+07	1.11915e+07	1.86256e+07	1.83362e+07	1.21113e+07	2.26747e+07	2.49548e+07	2.31881e+07	2.954e+07	1.58463e+07	9.19304e+06	1.39189e+07	2.88776e+07	1.81256e+07	1.57582e+07	0.241954	0.41778	0.237781
Q16851	UGP2	UTP--glucose-1-phosphate uridylyltransferase OS=Homo sapiens OX=9606 GN=UGP2 PE=1 SV=5	58	8	508	4.12351e+07	4.20241e+07	2.37465e+07	3.60179e+07	3.38067e+07	4.04068e+07	3.65577e+07	2.92067e+07	2.40904e+07	3.19913e+07	1.6699e+07	1.95825e+07	2.33395e+07	1.35704e+07	1.8894e+07	5.90673e+07	4.98185e+07	2.59452e+07	5.24246e+07	2.65142e+07	-0.127609	0.70901	-0.125447
P84085	ARF5	ADP-ribosylation factor 5 OS=Homo sapiens OX=9606 GN=ARF5 PE=1 SV=2	58	1	180	3.38918e+06	3.86818e+06	7.87733e+06	8.15752e+06	9.63957e+06	7.70593e+06	7.56306e+06	7.53227e+06	5.12241e+06	3.37024e+06	0	3.49111e+06	8.09989e+06	6.6142e+06	6.72664e+06	9.345e+06	5.93752e+06	4.93573e+06	3.69737e+06	1.77985e+06	-0.242864	0.479826	-0.207977
O14841	OPLAH	5-oxoprolinase OS=Homo sapiens OX=9606 GN=OPLAH PE=1 SV=3	58	17	1288	2.8446e+07	3.75857e+07	9.32093e+06	2.82805e+07	1.80733e+07	2.14333e+07	3.13002e+07	3.8837e+07	3.49621e+07	2.76198e+07	0	7.06418e+06	2.49277e+06	0	0	1.15868e+07	2.45504e+06	0	1.85176e+07	25414487	-2.55947	0.000106041	-1.54018
P14317	HCLS1	Hematopoietic lineage cell-specific protein OS=Homo sapiens OX=9606 GN=HCLS1 PE=1 SV=3	57	12	486	1.81666e+06	1.78289e+06	2.13044e+06	2.18864e+06	1.2958e+06	1.41275e+07	835027	0	0	0	1.48142e+07	6.65745e+07	9.20136e+07	6.90458e+07	2.37071e+07	5.42414e+07	7.50167e+07	6.41403e+07	3.90238e+07	1.36163e+07	4.51812	0.000956261	1.91666
P01591	JCHAIN	Immunoglobulin J chain OS=Homo sapiens OX=9606 GN=JCHAIN PE=1 SV=4	57	7	159	4.7707e+06	2.03769e+06	4.72929e+07	0	8.97611e+06	4.14192e+06	1.75922e+07	1.02808e+08	1.54528e+07	1.73843e+06	6.86967e+07	7.71752e+08	8.73375e+08	4.34962e+07	314233518	1.33684e+08	1.09497e+08	1.05028e+08	1.5089e+08	2.74376e+07	3.80178	0.0643342	0.81001
P62263	RPS14	40S ribosomal protein S14 OS=Homo sapiens OX=9606 GN=RPS14 PE=1 SV=3	57	5	151	2.77154e+07	2.76734e+07	2.72175e+07	4.18713e+07	3.72053e+07	3.0054e+07	3.43929e+07	3.76079e+07	2.78964e+07	2.73093e+07	5.00115e+07	7.62732e+07	8.6581e+07	6.6357e+07	9.4529e+07	105602461	1.56015e+08	7.21001e+07	6.02954e+07	3.66898e+07	1.41937	0.00313546	1.52933
Q9UHD8	SEPTIN9	Septin-9 OS=Homo sapiens OX=9606 GN=SEPTIN9 PE=1 SV=2	57	11	586	2.18322e+07	1.53706e+07	4.36707e+07	2.84891e+07	8.92318e+06	5.56227e+06	1.8252e+07	2.28057e+07	1.89769e+07	1.76148e+07	5.48827e+07	5.10328e+07	2.99862e+07	5.42523e+07	3.86623e+07	2.28693e+07	2.85216e+07	5.50237e+07	3.50551e+07	2.31059e+07	1.02988	0.00373507	0.949802
Q00577	PURA	Transcriptional activator protein Pur-alpha OS=Homo sapiens OX=9606 GN=PURA PE=1 SV=2	57	5	322	2.61253e+07	2.41884e+07	2.99564e+07	2.91296e+07	2.00124e+07	3.03322e+07	3.16617e+07	3.43158e+07	2.85681e+07	3.00605e+07	4.18448e+07	2.6808e+07	2.57178e+07	3.21254e+07	0	2.13394e+06	1.0314e+07	1.71792e+07	2.31961e+07	2.87346e+07	-0.513137	0.161921	-0.503327
P14927	UQCRB	Cytochrome b-c1 complex subunit 7 OS=Homo sapiens OX=9606 GN=UQCRB PE=1 SV=2	57	6	111	4.74219e+07	6.41054e+07	2.54602e+07	2.58078e+07	4.51258e+07	4.40317e+07	4.79456e+07	8.24951e+07	5.11622e+07	5.23134e+07	1.77247e+07	3.47654e+06	8.54886e+06	8.54319e+06	6.72366e+06	9.00196e+06	1.40052e+07	8.22585e+06	1.60337e+07	6.04039e+07	-2.24442	5.89367e-05	-1.89804
Q9Y4W6	AFG3L2	AFG3-like protein 2 OS=Homo sapiens OX=9606 GN=AFG3L2 PE=1 SV=2	57	11	797	3.60445e+07	4.00647e+07	1.0911e+07	3.20972e+07	4.14016e+07	5.77281e+07	3.51804e+07	4.59557e+07	3.32334e+07	3.14296e+07	0	5.31952e+06	0	7.82565e+06	3.89601e+07	2.35706e+06	2.12066e+06	0	1.14417e+07	3.78941e+07	-2.26799	0.000502232	-1.25066
Q9UJZ1	STOML2	Stomatin-like protein 2, mitochondrial OS=Homo sapiens OX=9606 GN=STOML2 PE=1 SV=1	57	8	356	3.75111e+07	4.5574e+07	1.94825e+07	3.59865e+07	5.42216e+07	5.77393e+07	3.48946e+07	3.06855e+07	2.91778e+07	3.49333e+07	0	1.13226e+07	8.98145e+06	4.53117e+06	3.35829e+06	3.99097e+06	4.35345e+06	5.14902e+06	2.5876e+07	3.44503e+07	-2.34047	5.63037e-05	-1.67904
P35914	HMGCL	Hydroxymethylglutaryl-CoA lyase, mitochondrial OS=Homo sapiens OX=9606 GN=HMGCL PE=1 SV=2	57	8	325	7.56359e+07	8.60145e+07	2.46879e+07	7.71639e+07	6.81697e+07	9.09581e+07	8.75447e+07	4.90236e+07	5.26007e+07	6.186e+07	0	3.17615e+06	0	0	0	3.93834e+06	2.56049e+06	3.94453e+06	4.22765e+07	6.34035e+07	-3.4392	2.22753e-05	-1.8781
Q15661	TPSAB1	Tryptase alpha/beta-1 OS=Homo sapiens OX=9606 GN=TPSAB1 PE=1 SV=1	56	7	275	1.05008e+07	1.08473e+07	1.75465e+07	1.28424e+07	1.22024e+07	7.63733e+06	5.24814e+06	7.74816e+06	3.49928e+06	1.02026e+07	3.36897e+08	1.18412e+08	7.20225e+07	1.05027e+08	8.25393e+07	5.21604e+07	8.86809e+07	1.60538e+08	3.91932e+06	2.09814e+07	3.52788	0.0241647	1.1154
Q15836	VAMP3	Vesicle-associated membrane protein 3 OS=Homo sapiens OX=9606 GN=VAMP3 PE=1 SV=3	56	2	100	1.44565e+07	1.7977e+07	1.90224e+07	1.99785e+07	2.43124e+07	1.81249e+07	1.7818e+07	2.25587e+07	2.07811e+07	1.85016e+07	2.35587e+07	2.46403e+07	3.59593e+07	3.0806e+07	1.75939e+07	2.09431e+07	1.88414e+07	2.0395e+07	2.50289e+07	1.71072e+07	0.322222	0.0594155	0.591395
O95571	ETHE1	Persulfide dioxygenase ETHE1, mitochondrial OS=Homo sapiens OX=9606 GN=ETHE1 PE=1 SV=2	56	7	254	1.8855e+07	2.02261e+07	1.77989e+07	2.27772e+07	1.74963e+07	3.22722e+07	1.65568e+07	2.09595e+07	1.6409e+07	1.79073e+07	2.93682e+06	1.84108e+07	2.57898e+07	1.13931e+07	1.18792e+07	5.63705e+07	1.56584e+07	8.80683e+06	3.19358e+07	2.59032e+07	0.0162267	0.972461	0.0115756
Q9NUB1	ACSS1	Acetyl-coenzyme A synthetase 2-like, mitochondrial OS=Homo sapiens OX=9606 GN=ACSS1 PE=1 SV=2	56	10	689	3.01783e+07	2.58784e+07	2.06362e+07	3.47702e+07	6.14722e+07	2.40475e+07	3.32437e+07	5.37937e+07	2.77591e+07	2.7021e+07	0	1.31945e+06	0	0	3.6499e+06	0	0	0	8.34896e+06	2.88714e+07	-4.51695	0.000192985	-2.11605
A0A0C4DH25	IGKV3D-20	Immunoglobulin kappa variable 3D-20 OS=Homo sapiens OX=9606 GN=IGKV3D-20 PE=3 SV=1	55	1	116	3.17777e+06	0	5.14435e+06	0	0	0	8.46455e+06	3.17262e+06	2.09098e+07	3.73387e+06	5.16952e+06	2.69946e+07	1.15393e+07	1.3757e+07	3.27337e+07	6.30916e+07	7.49467e+07	1.87861e+07	1.96753e+07	4.72687e+06	2.73197	0.0289301	0.878448
P46783	RPS10	40S ribosomal protein S10 OS=Homo sapiens OX=9606 GN=RPS10 PE=1 SV=1	55	3	165	2.07967e+07	1.82388e+07	6.40902e+07	2.74311e+07	3.02387e+07	1.83576e+07	2.47563e+07	2.90359e+07	2.02791e+07	1.26846e+07	5.71961e+07	6.05572e+07	5.54434e+07	8.65224e+07	1.775e+08	9.56265e+07	6.58004e+07	7.3566e+07	3.52159e+07	2.58323e+07	1.56365	0.00485938	0.994344
P25789	PSMA4	Proteasome subunit alpha type-4 OS=Homo sapiens OX=9606 GN=PSMA4 PE=1 SV=1	55	4	261	2.0089e+07	1.98086e+07	2.28585e+07	1.35675e+07	1.69657e+07	2.33306e+07	1.60711e+07	1.86767e+07	1.57369e+07	1.47753e+07	1.66368e+07	2.03299e+07	2.62904e+07	2.19196e+07	2.58046e+07	3.62872e+07	3.86685e+07	2.47661e+07	2.68169e+07	1.83869e+07	0.537067	0.011388	0.832347
P60981	DSTN	Destrin OS=Homo sapiens OX=9606 GN=DSTN PE=1 SV=3	55	5	165	50069041	4.44905e+07	1.02417e+08	6.90713e+07	7.56077e+07	7.62414e+07	6.14322e+07	6.02642e+07	5.78065e+07	7.79147e+07	1.61715e+08	8.47305e+07	6.15768e+07	7.79251e+07	1.99012e+08	6.01236e+07	5.31013e+07	9.85141e+07	6.13124e+07	5.17082e+07	0.497439	0.212261	0.434648
O94788	ALDH1A2	Retinal dehydrogenase 2 OS=Homo sapiens OX=9606 GN=ALDH1A2 PE=1 SV=3	55	8	518	7.8711e+06	1.02079e+07	1.20761e+07	1.54143e+07	2.85946e+07	4.60971e+07	1.17743e+07	1.41168e+07	1.37035e+07	1.34407e+07	2.4065e+07	1.53511e+07	2.6913e+06	5.37958e+07	5.74111e+06	0	6.68903e+06	2.28597e+06	0	1.09693e+07	-0.495636	0.53955	-0.183915
Q9UNF0	PACSIN2	Protein kinase C and casein kinase substrate in neurons protein 2 OS=Homo sapiens OX=9606 GN=PACSIN2 PE=1 SV=2	55	8	486	2.88281e+07	3.47996e+07	1.99813e+07	2.70373e+07	2.66869e+07	2.48824e+07	2.98205e+07	2.27695e+07	2.51517e+07	2.22719e+07	2.14084e+07	1.59828e+07	1.17939e+07	1.18792e+07	1.38662e+07	9.56613e+06	1.06826e+07	7.49077e+06	2.36458e+07	2.58364e+07	-0.901789	0.00031087	-1.33248
Q9UI12	ATP6V1H	V-type proton ATPase subunit H OS=Homo sapiens OX=9606 GN=ATP6V1H PE=1 SV=1	55	9	483	4.83394e+07	5.57627e+07	1.66453e+07	4.33637e+07	1.56375e+07	5.58108e+07	4.75073e+07	2.84344e+07	2.6512e+07	3.7739e+07	0	4.86021e+06	1.00758e+07	2.56674e+06	3.36394e+06	1.22648e+07	2.47468e+06	4.57244e+06	3.06521e+07	3.41742e+07	-2.25533	0.000546668	-1.28556
Q9NUJ1	ABHD10	Mycophenolic acid acyl-glucuronide esterase, mitochondrial OS=Homo sapiens OX=9606 GN=ABHD10 PE=1 SV=1	55	7	306	8.02591e+07	8.59916e+07	5.43463e+06	7.40903e+07	5.20855e+07	9.24073e+07	5.78126e+07	1.07413e+08	6.29238e+07	8.63307e+07	4.8249e+06	7.47676e+06	1.81465e+07	6.29999e+06	0	6.18559e+07	6.53954e+06	6.6705e+06	1.1309e+07	5.65039e+07	-2.365	0.000549483	-1.27493
Q06278	AOX1	Aldehyde oxidase OS=Homo sapiens OX=9606 GN=AOX1 PE=1 SV=2	55	17	1338	4.23063e+07	5.46013e+07	0	6.3274e+07	8.61257e+06	5.00181e+07	2.52897e+07	1.2661e+07	2.55698e+07	5.64847e+07	0	1.03894e+06	0	1.91587e+06	0	0	6.08492e+06	0	4.2923e+07	4.02227e+07	-2.55296	0.0119337	-0.814349
Q9BSH5	HDHD3	Haloacid dehalogenase-like hydrolase domain-containing protein 3 OS=Homo sapiens OX=9606 GN=HDHD3 PE=1 SV=1	55	7	251	7.27804e+07	8.75907e+07	1.45509e+07	3.40038e+07	1.79129e+07	7.11407e+07	5.74506e+07	3.58824e+07	2.69288e+07	6.8192e+07	0	3.16428e+06	2.50941e+06	0	0	0	0	0	2.05643e+07	3.25438e+07	-4.06051	0.00120464	-1.48057
P52790	HK3	Hexokinase-3 OS=Homo sapiens OX=9606 GN=HK3 PE=1 SV=2	54	19	923	6.57795e+06	6.61261e+06	1.14851e+07	7.96162e+06	2.20879e+07	3.23716e+07	4.78447e+06	6.56204e+06	6.59853e+06	8.14733e+06	0	8.88313e+06	2.28128e+07	1.13951e+07	1.93516e+08	4.73986e+08	7.80019e+07	6.35212e+06	3.96239e+07	6.30817e+06	3.0343	0.216331	0.525447
P11413	G6PD	Glucose-6-phosphate 1-dehydrogenase OS=Homo sapiens OX=9606 GN=G6PD PE=1 SV=4	54	15	515	1.46064e+07	1.33598e+07	2.7292e+07	1.98091e+07	1.08109e+07	8.48849e+06	1.75725e+07	1.08299e+07	8.89818e+06	1.05414e+07	2.45137e+07	4.66722e+07	7.19152e+07	4.94903e+07	5.72917e+07	3.25828e+08	1.11644e+08	3.77733e+07	4.46956e+07	2.24732e+07	2.58852	0.0870019	0.761043
P36955	SERPINF1	Pigment epithelium-derived factor OS=Homo sapiens OX=9606 GN=SERPINF1 PE=1 SV=4	54	12	418	1.91649e+07	4.71432e+07	9.78394e+06	8.00404e+06	3.45011e+07	6.53602e+06	1.94033e+07	1.79209e+07	3.10302e+07	1.3726e+07	1.1266e+08	2.98309e+07	3.26195e+07	6.31934e+07	4.40495e+07	6.2954e+07	5.0125e+07	8.6193e+07	3.14857e+07	9.37498e+06	1.46016	0.00546681	0.937865
P62249	RPS16	40S ribosomal protein S16 OS=Homo sapiens OX=9606 GN=RPS16 PE=1 SV=2	54	5	146	2.23726e+07	1.77065e+07	4.24934e+07	2.34059e+07	2.21807e+07	3.23679e+07	2.87585e+07	2.57286e+07	1.95895e+07	2.42712e+07	4.89523e+07	6.32311e+07	3.91531e+07	5.10988e+07	7.98963e+07	6.69302e+07	8.22759e+07	5.42644e+07	4.83322e+07	2.66888e+07	1.19695	0.000427354	1.60961
P24158	PRTN3	Myeloblastin OS=Homo sapiens OX=9606 GN=PRTN3 PE=1 SV=3	54	5	256	2.5653e+08	124444186	1.55156e+08	30223393	1.22426e+08	1.96815e+08	1.39308e+08	1.47286e+08	9.37199e+08	3.74143e+08	4.56772e+08	4.13583e+08	2.90026e+08	7.04755e+08	390542639	1033036394	6.72483e+08	4.19722e+08	2.20973e+08	226490446	1.04184	0.0687061	0.545336
O75955	FLOT1	Flotillin-1 OS=Homo sapiens OX=9606 GN=FLOT1 PE=1 SV=3	54	10	427	1.88653e+07	1.74636e+07	3.47927e+07	3.51241e+07	3.11487e+07	2.20204e+07	2.24717e+07	3.134e+07	2.4333e+07	1.81868e+07	1.24567e+07	3.35549e+07	4.11562e+07	1.80302e+07	1.86811e+07	1.23216e+08	3.34429e+07	3.21696e+07	5.71797e+07	2.18775e+07	0.684376	0.234696	0.405652
P68402	PAFAH1B2	Platelet-activating factor acetylhydrolase IB subunit beta OS=Homo sapiens OX=9606 GN=PAFAH1B2 PE=1 SV=1	54	4	229	1.51993e+07	1.4865e+07	3.15843e+07	1.93206e+07	6.59727e+06	8.54646e+06	1.15105e+07	1.39677e+07	1.07327e+07	8.0331e+06	2.93361e+07	1.73011e+07	1.05262e+07	1.92523e+07	17097139	8.83683e+06	7.34199e+06	1.45421e+07	1.55065e+07	1.11149e+07	0.145647	0.701987	0.113625
P62834	RAP1A	Ras-related protein Rap-1A OS=Homo sapiens OX=9606 GN=RAP1A PE=1 SV=1	54	2	184	6.02739e+06	8.38224e+06	0	5.18371e+06	4.76306e+06	2.82361e+06	8.1242e+06	5.3276e+06	9.98918e+06	7.72533e+06	6.80692e+06	6.74544e+06	5.1624e+06	5.17502e+06	0	7.42924e+06	1.96306e+06	4.9148e+06	6.05912e+06	5.47144e+06	-0.246765	0.546944	-0.180448
P52943	CRIP2	Cysteine-rich protein 2 OS=Homo sapiens OX=9606 GN=CRIP2 PE=1 SV=1	54	4	208	3.04237e+07	2.25538e+07	5.89045e+07	5.12453e+07	4.27249e+07	2.24477e+07	4.98673e+07	5.82302e+07	5.1661e+07	5.89013e+07	7.24484e+07	5.13497e+07	4.21464e+07	2.13709e+07	8.4866e+06	3.79843e+06	7.09669e+06	4.77767e+07	3.08557e+07	4.15619e+07	-0.495513	0.223558	-0.36093
P12821	ACE	Angiotensin-converting enzyme OS=Homo sapiens OX=9606 GN=ACE PE=1 SV=1	54	12	1306	1.10613e+08	8.39963e+07	2.40921e+07	8.29936e+07	5.26403e+07	8.5252e+07	5.16631e+07	5.92117e+07	7.83987e+07	2.0073e+07	3.09807e+07	2.3619e+07	1.06002e+07	2.90077e+07	1.50667e+07	2.8866e+07	1.81108e+07	1.95943e+07	2.99485e+07	2.42308e+07	-1.50487	0.00370991	-1.2298
Q9NPJ3	ACOT13	Acyl-coenzyme A thioesterase 13 OS=Homo sapiens OX=9606 GN=ACOT13 PE=1 SV=1	54	5	140	6.47667e+07	8.01909e+07	1.30659e+07	2.55281e+07	3.23146e+07	9.37012e+07	4.46104e+07	3.80118e+07	5.25794e+07	7.30022e+07	0	0	0	0	2.81631e+07	0	8.81158e+06	0	1.61278e+07	3.68994e+07	-3.13346	0.00106618	-1.34893
P51649	ALDH5A1	Succinate-semialdehyde dehydrogenase, mitochondrial OS=Homo sapiens OX=9606 GN=ALDH5A1 PE=1 SV=2	54	7	535	5.1566e+07	6.62903e+07	1.31889e+07	4.22068e+07	6.24712e+07	8.44645e+07	4.24305e+07	3.80329e+07	3.58126e+07	4.63138e+07	0	4.40607e+06	4.13121e+06	1.41076e+07	0	2.89742e+06	0	6.71883e+06	7.98694e+06	4.23173e+07	-3.43236	0.000306559	-1.91662
Q53FZ2	ACSM3	Acyl-coenzyme A synthetase ACSM3, mitochondrial OS=Homo sapiens OX=9606 GN=ACSM3 PE=1 SV=2	54	11	586	4.80648e+07	4.55602e+07	7.61277e+06	2.74638e+07	2.36212e+07	6.52019e+07	4.71084e+07	5.65937e+07	2.69474e+07	2.40604e+07	0	0	0	0	2.66262e+06	7.89298e+06	7.25974e+06	0	1.84652e+06	3.324e+07	-4.09074	0.000747578	-1.75236
Q969I3	GLYATL1	Glycine N-acyltransferase-like protein 1 OS=Homo sapiens OX=9606 GN=GLYATL1 PE=1 SV=1	54	7	302	9.1446e+07	1.03179e+08	1.22714e+07	5.67033e+07	5.0642e+07	1.3642e+08	6.1602e+07	7.40538e+07	7.37609e+07	7.89782e+07	0	0	0	0	3.73109e+06	0	0	0	1.05735e+07	5.90129e+07	-5.53913	0.000441949	-2.07661
Q9H299	SH3BGRL3	SH3 domain-binding glutamic acid-rich-like protein 3 OS=Homo sapiens OX=9606 GN=SH3BGRL3 PE=1 SV=1	53	3	93	2.28625e+07	3.08202e+07	6.46279e+07	2.74144e+07	5.00066e+07	2.11078e+07	1.8988e+07	1.86222e+07	2.07091e+07	2.10578e+07	5.46546e+07	1.11408e+08	2.59415e+08	8.11895e+07	1.45804e+08	2.45506e+08	1.69328e+08	9.43099e+07	8.78369e+07	3.53265e+07	2.22857	0.00570943	1.30781
O15144	ARPC2	Actin-related protein 2/3 complex subunit 2 OS=Homo sapiens OX=9606 GN=ARPC2 PE=1 SV=1	53	7	300	1.55336e+07	1.87864e+07	2.28113e+07	1.52976e+07	7.02385e+06	1.70833e+07	1.69956e+07	2.19117e+07	1.74627e+07	1.73472e+07	3.97871e+07	4.10871e+07	5.43684e+07	4.67631e+07	2.52905e+07	9.76267e+07	6.87984e+07	4.60852e+07	5.62233e+07	3.2021e+07	1.63537	0.00268974	1.52106
P60900	PSMA6	Proteasome subunit alpha type-6 OS=Homo sapiens OX=9606 GN=PSMA6 PE=1 SV=1	53	6	246	3.23853e+07	3.5807e+07	3.50369e+07	3.00641e+07	5.25322e+07	3.14399e+07	2.88597e+07	3.23004e+07	2.85658e+07	2.35931e+07	3.53071e+07	2.9558e+07	3.49864e+07	3.32592e+07	2.92407e+07	4.65402e+07	2.3605e+07	3.46967e+07	4.07758e+07	2.56642e+07	0.049771	0.776783	0.0854331
P09543	CNP	2',3'-cyclic-nucleotide 3'-phosphodiesterase OS=Homo sapiens OX=9606 GN=CNP PE=1 SV=2	53	11	421	2.70917e+07	27985551	1.55043e+07	4.82932e+07	6.17461e+07	3.45336e+07	3.81205e+07	8.40503e+07	7.5021e+07	3.82411e+07	2.12639e+07	1.43683e+07	1.71258e+06	1.09872e+07	0	0	1.29414e+07	2.00314e+07	1.0231e+07	4.79756e+07	-2.1474	0.00227394	-1.21935
P32754	HPD	4-hydroxyphenylpyruvate dioxygenase OS=Homo sapiens OX=9606 GN=HPD PE=1 SV=2	53	10	393	9.4505e+07	9.14893e+07	7.62567e+06	3.15915e+07	1.70151e+07	9.78248e+07	45530132	1.72968e+07	2.53304e+07	9.77361e+07	0	0	0	0	0	0	0	0	4.2064e+06	2.23748e+07	-6.81418	0.0057904	-1.38838
P35556	FBN2	Fibrillin-2 OS=Homo sapiens OX=9606 GN=FBN2 PE=1 SV=3	52	3	2912	4.47943e+06	2.07144e+06	7.27685e+06	4.49559e+06	0	2.22432e+06	8.50343e+06	7.14647e+06	6.64409e+06	9.55751e+06	6.22424e+07	2.84549e+07	8.3479e+06	1.0644e+08	0	4.8365e+06	1.21521e+07	2.81222e+07	5.9497e+06	7.5529e+06	2.4436	0.128286	0.648252
P18621	RPL17	60S ribosomal protein L17 OS=Homo sapiens OX=9606 GN=RPL17 PE=1 SV=3	52	6	184	1.56164e+07	9.176e+06	1.83884e+07	2.12333e+07	1.67521e+07	1.04157e+07	1.62248e+07	2.35281e+07	1.73131e+07	2.10348e+07	3.09412e+07	4.95907e+07	7.16705e+07	3.37022e+07	9.08333e+06	1.44512e+07	6.17307e+07	4.94478e+07	2.99802e+07	2.27254e+07	1.19898	0.0285168	0.917316
P62424	RPL7A	60S ribosomal protein L7a OS=Homo sapiens OX=9606 GN=RPL7A PE=1 SV=2	52	9	266	2.04366e+07	1.51029e+07	3.34437e+07	2.58473e+07	2.61907e+07	2.39192e+07	3.31033e+07	2.27844e+07	2.0646e+07	2.22433e+07	5.84336e+07	5.95292e+07	4.99694e+07	4.6611e+07	4.27685e+07	4.73878e+07	7.09294e+07	5.78213e+07	4.98679e+07	2.81832e+07	1.13977	5.10958e-06	2.16058
P83731	RPL24	60S ribosomal protein L24 OS=Homo sapiens OX=9606 GN=RPL24 PE=1 SV=1	52	3	157	2.81485e+07	2.50252e+07	4.51262e+07	3.83692e+07	2.72094e+07	2.72475e+07	2.25718e+07	3.55236e+07	2.75311e+07	2.79967e+07	6.3318e+07	7.29434e+07	8.27599e+07	6.01413e+07	7.92056e+07	7.16505e+07	6.98991e+07	5.89423e+07	3.75038e+07	2.96901e+07	1.12057	2.45752e-05	1.85331
P51608	MECP2	Methyl-CpG-binding protein 2 OS=Homo sapiens OX=9606 GN=MECP2 PE=1 SV=1	52	9	486	1.63566e+07	1.23798e+07	2.91767e+07	1.13176e+07	2.12142e+07	5.64074e+06	1.12871e+07	2.64793e+07	1.97077e+07	1.80426e+07	6.56573e+07	5.16661e+07	3.8562e+07	7.5366e+07	8.93133e+06	5.07622e+06	5.92573e+06	3.9729e+07	3.75511e+06	28838409	0.932027	0.197597	0.4687
O94979	SEC31A	Protein transport protein Sec31A OS=Homo sapiens OX=9606 GN=SEC31A PE=1 SV=3	52	10	1220	2.09397e+07	2.87143e+07	3.45234e+07	2.77375e+07	2.47656e+07	2.09872e+07	2.42706e+07	1.38969e+07	2.06753e+07	3.02764e+07	2.86051e+07	4.25162e+07	3.68399e+07	3.30298e+07	6.11027e+07	43904253	7.35279e+07	3.45748e+07	4.0146e+07	2.87811e+07	0.827835	0.00423476	0.993071
P61088	UBE2N	Ubiquitin-conjugating enzyme E2 N OS=Homo sapiens OX=9606 GN=UBE2N PE=1 SV=1	52	3	152	2.90654e+07	3.84366e+07	5.28643e+07	3.95855e+07	4.22652e+07	4.22801e+07	3.17812e+07	2.75371e+07	3.28267e+07	2.86112e+07	5.74559e+07	4.93621e+07	6.72576e+07	4.81265e+07	5.25075e+07	5.13081e+07	5.08595e+07	4.61515e+07	4.76909e+07	4.048e+07	0.517974	0.00104498	1.14681
Q13247	SRSF6	Serine/arginine-rich splicing factor 6 OS=Homo sapiens OX=9606 GN=SRSF6 PE=1 SV=2	52	4	344	4.22982e+07	3.23203e+07	9.68374e+07	7.85434e+07	1.29334e+08	2.07722e+08	5.76447e+07	6.78509e+07	5.16184e+07	2.69321e+07	6.9409e+07	7.38291e+07	7.17427e+07	7.77035e+07	4.43756e+08	3.44438e+07	4.22757e+07	8.09403e+07	3.56308e+07	4.4901e+07	0.384955	0.659833	0.139387
O75347	TBCA	Tubulin-specific chaperone A OS=Homo sapiens OX=9606 GN=TBCA PE=1 SV=3	52	5	108	2.93654e+07	2.92605e+07	3.34918e+07	2.60507e+07	2.247e+07	1.92459e+07	2.63357e+07	2.83358e+07	2.42461e+07	2.58026e+07	1.68464e+07	1.62697e+07	1.76085e+07	1.55453e+07	9.41822e+06	5.08891e+06	9.93782e+06	1.25885e+07	3.63467e+07	2.4699e+07	-0.770018	0.00713935	-0.902992
P15153	RAC2	Ras-related C3 botulinum toxin substrate 2 OS=Homo sapiens OX=9606 GN=RAC2 PE=1 SV=1	51	3	192	3.03117e+07	2.7322e+07	5.69746e+07	3.11921e+07	4.00719e+07	3.40548e+07	4.4886e+07	3.80665e+07	3.09151e+07	2.76165e+07	9.48083e+07	1.63557e+08	2.83479e+08	1.64347e+08	2.77662e+08	9.12652e+08	2.81268e+08	1.28808e+08	7.84699e+07	4.87174e+07	2.87431	0.0522611	0.916092
P40429	RPL13A	60S ribosomal protein L13a OS=Homo sapiens OX=9606 GN=RPL13A PE=1 SV=2	51	3	203	2.0517e+07	1.72093e+07	3.29889e+07	2.25946e+07	1.66721e+07	3.15116e+07	2.36791e+07	2.17862e+07	2.09103e+07	2.05693e+07	4.84955e+07	4.78355e+07	48506947	5.01851e+07	1.36857e+08	6.42131e+07	6.85062e+07	5.44102e+07	3.08592e+07	2.59518e+07	1.41929	0.0131814	1.13288
Q6PCB0	VWA1	von Willebrand factor A domain-containing protein 1 OS=Homo sapiens OX=9606 GN=VWA1 PE=1 SV=1	51	9	445	1.74112e+07	2.92818e+06	6.73602e+07	9.58533e+06	1.25242e+06	2.75522e+06	1.55103e+07	1.44885e+07	1.17988e+07	1.57071e+07	3.26113e+07	9.4044e+07	3.77028e+07	6.80891e+07	0	7.31166e+06	0	5.11543e+07	3.93356e+07	3.53467e+07	1.20837	0.147499	0.433605
P18085	ARF4	ADP-ribosylation factor 4 OS=Homo sapiens OX=9606 GN=ARF4 PE=1 SV=3	51	4	180	1.23502e+07	9.05314e+06	1.43118e+07	1.71644e+07	1.0111e+07	8.46537e+06	1.21452e+07	1.1351e+07	9.28308e+06	8.0615e+06	1.62769e+07	2.15909e+07	1.58286e+07	1.60941e+07	3.66692e+07	3.18622e+07	4.72454e+07	1.73799e+07	2.36172e+07	1.20884e+07	1.16461	0.0132352	1.05572
Q9Y678	COPG1	Coatomer subunit gamma-1 OS=Homo sapiens OX=9606 GN=COPG1 PE=1 SV=1	51	11	874	2.63411e+07	2.95778e+07	3.24817e+07	3.43723e+07	3.30817e+07	2.34878e+07	2.71556e+07	2.91556e+07	2.47588e+07	2.12103e+07	1.98199e+07	4.87247e+07	3.60395e+07	2.81621e+07	1.25357e+08	7.49451e+07	1.19847e+08	3.67295e+07	3.95348e+07	3.29046e+07	1.06194	0.081758	0.743931
Q16527	CSRP2	Cysteine and glycine-rich protein 2 OS=Homo sapiens OX=9606 GN=CSRP2 PE=1 SV=3	51	5	193	2.18838e+07	1.09616e+07	39161991	2.64575e+07	1.18853e+07	5.73344e+06	2.03801e+07	2.35514e+07	2.41599e+07	2.29887e+07	6.51913e+07	5.61389e+07	1.537e+07	4.09821e+07	2.27238e+07	0	1.18951e+07	5.68356e+07	1.53884e+07	2.24528e+07	0.609787	0.293726	0.349742
P28066	PSMA5	Proteasome subunit alpha type-5 OS=Homo sapiens OX=9606 GN=PSMA5 PE=1 SV=3	51	6	241	4.17282e+07	4.2961e+07	43145392	3.47762e+07	4.9342e+07	4.00293e+07	3.58827e+07	3.89611e+07	3.20798e+07	3.72293e+07	3.82724e+07	4.29396e+07	8.3392e+07	4.53576e+07	2.91323e+07	7.01904e+07	5.42265e+07	5.47331e+07	6.94165e+07	4.17475e+07	0.451888	0.0679853	0.689113
P25788	PSMA3	Proteasome subunit alpha type-3 OS=Homo sapiens OX=9606 GN=PSMA3 PE=1 SV=2	51	4	255	1.3752e+07	1.47854e+07	1.27098e+07	1.5671e+07	1.93618e+07	1.76347e+07	1.54806e+07	1.3321e+07	1.50684e+07	1.40372e+07	1.45127e+07	1.74248e+07	1.13475e+07	1.03432e+07	2.09983e+07	2.96365e+07	2.25617e+07	1.90319e+07	2.38621e+07	1.32642e+07	0.312769	0.178431	0.472148
Q9BXN1	ASPN	Asporin OS=Homo sapiens OX=9606 GN=ASPN PE=1 SV=2	51	9	380	3.31236e+07	2.79318e+07	2.54565e+07	4.8681e+07	4.84399e+07	2.27141e+07	4.21457e+07	5.43473e+07	3.62339e+07	1.41315e+07	2.52301e+07	9.84046e+06	0	2.63435e+07	1.76268e+07	0	3.72572e+07	7.16786e+07	8.5511e+07	1.98561e+07	-0.217028	0.69814	-0.121024
P30085	CMPK1	UMP-CMP kinase OS=Homo sapiens OX=9606 GN=CMPK1 PE=1 SV=3	51	7	196	3.47356e+07	3.62839e+07	1.4106e+07	2.34155e+07	1.40058e+07	3.39942e+07	2.98709e+07	3.38241e+07	2.55559e+07	3.72234e+07	2.23733e+07	1.49592e+07	1.40906e+07	1.36317e+07	0	0	5.68678e+06	1.98342e+07	4.7296e+07	3.06824e+07	-0.88555	0.0524222	-0.593648
P13640	MT1G	Metallothionein-1G OS=Homo sapiens OX=9606 GN=MT1G PE=1 SV=2	51	1	62	1.68582e+08	4.44235e+07	2.02557e+06	3.23146e+07	8.14756e+06	2.73362e+08	8.20355e+07	1.88022e+07	1.13674e+07	5.83222e+06	0	1.1092e+06	4.59152e+06	0	0	1.31453e+06	3.33656e+06	4.02215e+06	2.98009e+08	1.35556e+08	-0.898206	0.569793	-0.168671
Q93050	ATP6V0A1	V-type proton ATPase 116 kDa subunit a isoform 1 OS=Homo sapiens OX=9606 GN=ATP6V0A1 PE=1 SV=3	51	11	837	3.86667e+07	4.94955e+07	3.72301e+06	2.6257e+07	1.29882e+07	3.60412e+07	3.84485e+07	1.20856e+07	1.99542e+07	4.10661e+07	2.33614e+06	0	0	0	0	4.31702e+06	4.97057e+06	0	3.17004e+07	2.6856e+07	-2.5336	0.00425512	-0.959612
Q9BTV4	TMEM43	Transmembrane protein 43 OS=Homo sapiens OX=9606 GN=TMEM43 PE=1 SV=1	50	7	400	9.87271e+06	5.38364e+06	5.52015e+07	1.67482e+07	1.10238e+07	0	9.93435e+06	2.05319e+07	1.26186e+07	1.79908e+07	5.43678e+07	4.1893e+07	6.4094e+07	7.55113e+07	4.435e+07	4.20511e+07	4.85157e+07	4.32053e+07	2.81456e+07	2.14092e+07	1.62469	0.000655715	1.21137
P51606	RENBP	N-acylglucosamine 2-epimerase OS=Homo sapiens OX=9606 GN=RENBP PE=1 SV=2	50	7	427	4.58481e+07	5.31099e+07	3.31889e+07	3.63969e+07	7.3027e+07	1.11962e+08	5.61943e+07	2.64311e+07	3.00199e+07	4.15992e+07	1.78571e+07	2.26377e+07	2.13277e+07	2.9412e+07	3.3673e+08	6.79267e+08	6.13391e+07	1.38973e+07	2.34445e+07	3.79899e+07	1.39986	0.384428	0.34625
Q30154	HLA-DRB5	HLA class II histocompatibility antigen, DR beta 5 chain OS=Homo sapiens OX=9606 GN=HLA-DRB5 PE=1 SV=1	50	2	266	3.0784e+06	1.18953e+07	1.90918e+07	5.07922e+06	1.77286e+07	1.88042e+07	1.04475e+07	1.31461e+07	1.28383e+07	1.06119e+06	1.16436e+07	2.18327e+07	4.53458e+07	1.30097e+07	3.44749e+07	3.43311e+07	4.64817e+07	1.20164e+07	3.76674e+07	7.09963e+06	1.33417	0.0156502	0.884149
P47897	QARS1	Glutamine--tRNA ligase OS=Homo sapiens OX=9606 GN=QARS1 PE=1 SV=1	50	8	775	2685276531	3875276745	7.44273e+08	1492090908	2258758864	3993439945	2153078355	2749573576	2452528884	2359748292	5018804810	2129729135	4552189017	3560678286	1675717908	2470642748	4277583589	2570636074	4230198900	3824094055	0.451912	0.133806	0.442978
P30040	ERP29	Endoplasmic reticulum resident protein 29 OS=Homo sapiens OX=9606 GN=ERP29 PE=1 SV=4	50	4	261	3.83828e+07	4.39995e+07	3.06685e+07	3.20132e+07	3.89551e+07	2.45274e+07	3.88585e+07	3.55784e+07	3.15281e+07	2.91976e+07	3.59364e+07	4.74007e+07	6.17097e+07	2.70035e+07	1.21617e+07	4.86156e+07	5.3554e+07	3.67357e+07	4.88669e+07	3.43343e+07	0.266056	0.292552	0.353137
Q02790	FKBP4	Peptidyl-prolyl cis-trans isomerase FKBP4 OS=Homo sapiens OX=9606 GN=FKBP4 PE=1 SV=3	50	6	459	2.79739e+07	2.66144e+07	1.74175e+07	3.0529e+07	1.05053e+07	1.97175e+07	1.92077e+07	1.58012e+07	2.72092e+07	1.9857e+07	1.98326e+07	9.48288e+06	1.25601e+07	1.535e+07	1.07596e+07	3.12749e+06	7.87805e+06	1.9162e+07	3.57529e+07	1.44379e+07	-0.529994	0.137274	-0.441623
Q9BRF8	CPPED1	Serine/threonine-protein phosphatase CPPED1 OS=Homo sapiens OX=9606 GN=CPPED1 PE=1 SV=3	50	6	314	40467824	3.74812e+07	2.38776e+07	2.98352e+07	2.94474e+07	4.78022e+07	32603880	2.71923e+07	2.09004e+07	2.63374e+07	6.92252e+06	5.42026e+06	2.53382e+07	12719095	2.25887e+07	2.68018e+07	3.03393e+07	1.14354e+07	3.36929e+07	3.72126e+07	-0.69819	0.0257955	-0.685222
Q9Y4F1	FARP1	FERM, ARHGEF and pleckstrin domain-containing protein 1 OS=Homo sapiens OX=9606 GN=FARP1 PE=1 SV=1	50	8	1045	2.21847e+07	1.92269e+07	2.48689e+07	2.90252e+07	3.24134e+07	2.3943e+07	2.58292e+07	2.752e+07	3.01956e+07	1.95435e+07	6.87696e+06	7.83761e+06	1.36928e+06	1.50361e+06	0	0	0	8.24714e+06	1.40036e+07	1.81205e+07	-2.52486	2.06784e-06	-2.36343
P08574	CYC1	Cytochrome c1, heme protein, mitochondrial OS=Homo sapiens OX=9606 GN=CYC1 PE=1 SV=3	50	4	325	3.63355e+07	2.88474e+07	2.03711e+07	3.46508e+07	3.91914e+07	2.42748e+07	4.68674e+07	5.83034e+07	4.22105e+07	4.03424e+07	3156021	8.18038e+06	0	3.9014e+06	4.04995e+06	7.24006e+06	5.67976e+06	2.9145e+06	1.69035e+07	3.67409e+07	-2.68366	1.54509e-05	-2.08142
P51687	SUOX	Sulfite oxidase, mitochondrial OS=Homo sapiens OX=9606 GN=SUOX PE=1 SV=2	50	9	545	6.62326e+07	6.7609e+07	2.29775e+07	2.99915e+07	3.39171e+07	7.62277e+07	5.9355e+07	2.84556e+07	3.86185e+07	5.21434e+07	0	891641	0	0	3.21914e+07	0	2.15606e+06	0	1.57538e+07	4.70148e+07	-3.06916	0.000251425	-1.46215
Q96NB2	SFXN2	Sideroflexin-2 OS=Homo sapiens OX=9606 GN=SFXN2 PE=1 SV=2	50	7	322	8.35914e+07	7.8719e+07	1.4387e+07	6.40232e+07	5.18175e+07	102758338	5.70271e+07	4.07349e+07	7.2785e+07	6.39946e+07	0	0	0	2.90298e+06	4.99165e+06	2.30331e+07	8.36958e+06	4.7083e+06	1.17102e+07	3.22904e+07	-3.34682	0.000215445	-1.87874
Q15942	ZYX	Zyxin OS=Homo sapiens OX=9606 GN=ZYX PE=1 SV=1	49	8	572	1.62629e+07	8.24212e+06	2.79963e+07	1.69617e+07	1.00853e+07	5.09188e+06	1.64043e+07	1.01772e+07	2.53226e+07	3.63494e+07	6.42988e+07	4.95894e+07	6.23817e+07	6.0706e+07	3.12039e+07	4.74004e+07	8.15167e+07	7.56371e+07	5.72175e+07	2.19655e+07	1.76798	2.96763e-05	1.76189
P62857	RPS28	40S ribosomal protein S28 OS=Homo sapiens OX=9606 GN=RPS28 PE=1 SV=1	49	3	69	3.37257e+07	3.59708e+07	6.1499e+07	3.71108e+07	6.1934e+07	3.60789e+07	2.50375e+07	4.00745e+07	2.74994e+07	2.78818e+07	5.59966e+07	8.10808e+07	1.19985e+08	7.05021e+07	110277729	104219312	1.7215e+08	6.70168e+07	6.49361e+07	3.76741e+07	1.28131	0.00531785	1.17338
Q02878	RPL6	60S ribosomal protein L6 OS=Homo sapiens OX=9606 GN=RPL6 PE=1 SV=3	49	5	288	3.67029e+07	3.16841e+07	7.48983e+07	4.78305e+07	3.82428e+07	4.06589e+07	4.17574e+07	4.04049e+07	3.54537e+07	3.45989e+07	7.59654e+07	8.9709e+07	8.22007e+07	6.48037e+07	1.69008e+08	100340245	1.58117e+08	8.96633e+07	6.00865e+07	3.97779e+07	1.2276	0.00618726	1.17279
P35606	COPB2	Coatomer subunit beta' OS=Homo sapiens OX=9606 GN=COPB2 PE=1 SV=2	49	11	906	1.99225e+07	1.31939e+07	4.31856e+07	2.63598e+07	2.54516e+07	2.65022e+07	2.21656e+07	2.34766e+07	2.00135e+07	1.52788e+07	1.94316e+07	3.52037e+07	2.71613e+07	3.19591e+07	1.39208e+08	6.687e+07	6.72533e+07	3.08903e+07	3.20651e+07	2.09361e+07	1.08603	0.111972	0.613338
P24534	EEF1B2	Elongation factor 1-beta OS=Homo sapiens OX=9606 GN=EEF1B2 PE=1 SV=3	49	6	225	2.62559e+07	3.58039e+07	2.61622e+07	2.72202e+07	4.9608e+07	2.15223e+07	4.83478e+07	2.17887e+07	2.36213e+07	2.93377e+07	4.07579e+07	5.01026e+07	7.30796e+07	3.0474e+07	4.4431e+07	4.00807e+07	9.02403e+07	5.27842e+07	4.68169e+07	3.64408e+07	0.750152	0.0150442	0.775952
Q9UHE5	NAT8	N-acetyltransferase 8 OS=Homo sapiens OX=9606 GN=NAT8 PE=1 SV=2	49	7	227	1.19584e+08	1.69834e+08	4.5948e+07	7.49739e+07	6.99e+07	1.34966e+08	1.23982e+08	1.89002e+08	7.19758e+07	1.10642e+08	4.98687e+07	2.70443e+08	2.7003e+08	5.10538e+07	1.68504e+08	2.91585e+08	8.5613e+07	8.06611e+07	2.12405e+08	1.04558e+08	0.566151	0.234552	0.386716
P35998	PSMC2	26S proteasome regulatory subunit 7 OS=Homo sapiens OX=9606 GN=PSMC2 PE=1 SV=3	49	8	433	2.1595e+07	2.392e+07	1.91283e+07	2.63345e+07	2.21898e+07	1.37186e+07	1.89667e+07	1.73047e+07	1.04164e+07	2.17105e+07	2.66241e+07	2.91003e+07	1.98721e+07	3.22026e+07	1.43918e+07	3.62445e+07	2.9196e+07	3.21099e+07	3.7466e+07	2.11351e+07	0.549357	0.0133592	0.783785
P14174	MIF	Macrophage migration inhibitory factor OS=Homo sapiens OX=9606 GN=MIF PE=1 SV=4	49	4	115	2.1905e+08	3.29688e+08	2.83787e+08	2.70864e+08	209512097	3.0918e+08	1.73586e+08	2.07374e+08	1.64461e+08	2.22406e+08	1.85156e+08	2.63545e+08	1.74264e+08	2.0588e+08	3.56866e+08	2.51787e+08	2.53502e+08	1.86906e+08	1.40555e+08	2.23258e+08	-0.0916959	0.666324	-0.128592
Q15847	ADIRF	Adipogenesis regulatory factor OS=Homo sapiens OX=9606 GN=ADIRF PE=1 SV=1	49	6	76	4.18746e+07	6.70384e+07	3.41511e+07	2.86588e+07	6.88893e+07	6.12157e+07	2.45642e+07	1.61805e+07	4.30012e+07	6.35418e+07	7.20165e+07	3.39509e+07	2.92219e+07	38744807	8.21836e+06	1.03279e+07	0	1.06284e+07	1.07968e+07	3.17863e+07	-0.91811	0.0717125	-0.53787
P53007	SLC25A1	Tricarboxylate transport protein, mitochondrial OS=Homo sapiens OX=9606 GN=SLC25A1 PE=1 SV=2	49	9	311	6.22032e+07	5.68771e+07	2.26482e+07	3.69207e+07	4.64935e+07	4.85702e+07	5.01695e+07	5.74986e+07	3.97601e+07	5.5458e+07	4.64075e+06	9.74153e+06	7.66888e+06	9.55099e+06	8.81315e+06	6.79575e+06	1.25916e+07	9.23204e+06	1.86207e+07	4.32121e+07	-2.29086	2.43213e-05	-2.52646
Q6P587	FAHD1	Acylpyruvase FAHD1, mitochondrial OS=Homo sapiens OX=9606 GN=FAHD1 PE=1 SV=2	49	7	224	8.82991e+07	6.29341e+07	1.53466e+07	5.17538e+07	4.50875e+07	5.34827e+07	6.57173e+07	6.24676e+07	5.971e+07	7.64357e+07	8.14531e+06	5.03516e+06	9.07021e+06	0	0	0	0	1.16252e+07	3.02051e+07	6.5282e+07	-3.02915	3.36072e-05	-1.84214
P01780	IGHV3-7	Immunoglobulin heavy variable 3-7 OS=Homo sapiens OX=9606 GN=IGHV3-7 PE=1 SV=2	48	2	117	5.37144e+06	625760	9.46417e+06	0	4.58092e+06	3.33639e+06	1.01085e+07	7.61024e+06	3.65368e+07	1.0238e+07	3.08624e+07	6.56826e+07	3.48668e+07	4.45776e+07	1.39448e+07	3.83892e+07	4.26949e+07	3.27678e+07	3.31665e+07	8.49094e+06	2.09107	0.000506563	1.25203
Q86V81	ALYREF	THO complex subunit 4 OS=Homo sapiens OX=9606 GN=ALYREF PE=1 SV=3	48	5	257	1.11273e+07	1.12802e+07	1.04976e+07	7.03374e+06	4.59755e+06	7.10674e+06	8.3215e+06	7.62056e+06	1.19191e+07	1.0667e+07	3.68481e+07	3.25245e+07	3.11538e+07	2.48547e+07	2.78254e+07	7.42373e+06	2.69039e+07	2.87689e+07	2.30201e+07	1.46071e+07	1.56022	8.14696e-05	1.73778
P62854	RPS26	40S ribosomal protein S26 OS=Homo sapiens OX=9606 GN=RPS26 PE=1 SV=3	48	3	115	1.64594e+07	1.40957e+07	2.05057e+07	2.4654e+07	2.4829e+07	1.74628e+07	2.37697e+07	2.25295e+07	1.84188e+07	1.74523e+07	3.60609e+07	3.83226e+07	2.90885e+07	3.86051e+07	4.72176e+07	5.00587e+07	5.83596e+07	3.75363e+07	3.34014e+07	2.37153e+07	1.03298	0.00044337	1.71367
O43491	EPB41L2	Band 4.1-like protein 2 OS=Homo sapiens OX=9606 GN=EPB41L2 PE=1 SV=1	48	13	1005	9.38387e+06	1.07383e+07	3.97286e+07	2.44194e+07	2.02254e+07	6.98286e+06	2.33757e+07	2.29847e+07	3.75216e+07	1.76719e+07	7.97641e+07	7.78892e+07	3.64742e+07	7.44695e+07	1.31123e+07	9.1556e+06	1.73953e+07	2.25257e+07	9.31877e+06	2.74577e+07	0.826911	0.222351	0.417143
O95782	AP2A1	AP-2 complex subunit alpha-1 OS=Homo sapiens OX=9606 GN=AP2A1 PE=1 SV=3	48	5	977	6.80919e+06	5.80733e+06	1.15724e+07	8.95748e+06	6.14629e+06	7.12155e+06	8.10054e+06	3.06434e+06	5.71574e+06	7.04913e+06	1.07078e+07	1.03242e+07	9.30144e+06	1.12524e+07	2.79099e+07	2.76036e+06	7.27495e+06	6.81845e+06	8.76734e+06	7.13757e+06	0.587277	0.207897	0.404938
P55884	EIF3B	Eukaryotic translation initiation factor 3 subunit B OS=Homo sapiens OX=9606 GN=EIF3B PE=1 SV=3	48	6	814	1.01038e+07	6.63381e+06	1.08825e+07	1.19295e+07	1.02707e+07	8.4336e+06	7.64798e+06	8.89638e+06	1.30301e+07	7.11685e+06	1.22062e+07	2.27141e+07	1.25892e+07	1.40215e+07	1.33735e+07	5.51837e+06	1.27588e+07	1.0094e+07	1.37508e+07	1.76881e+07	0.453669	0.0716669	0.562596
P02652	APOA2	Apolipoprotein A-II OS=Homo sapiens OX=9606 GN=APOA2 PE=1 SV=1	48	4	100	5.02116e+07	4.01507e+07	7.92498e+07	1.6583e+06	5.4522e+07	2.19394e+07	4.63706e+07	4.10793e+07	1.11967e+08	4.25767e+07	1.61392e+08	2.58507e+07	5.83968e+07	1.05741e+08	9.03074e+07	2.46858e+07	4.52174e+07	5.69126e+07	2.36336e+07	1.77698e+07	0.425962	0.430151	0.234203
Q92896	GLG1	Golgi apparatus protein 1 OS=Homo sapiens OX=9606 GN=GLG1 PE=1 SV=2	48	8	1179	8.59523e+06	5.35669e+06	1.33693e+07	1.30661e+07	8.13001e+06	3.68155e+06	1.0382e+07	1.27656e+07	8.15294e+06	6.66332e+06	2.68743e+06	1.54563e+07	1.10749e+07	6.63534e+06	1.45349e+07	8.08289e+06	1.77905e+07	6.59201e+06	1.32992e+07	1.15075e+07	0.244809	0.475193	0.21188
Q9NVD7	PARVA	Alpha-parvin OS=Homo sapiens OX=9606 GN=PARVA PE=1 SV=1	48	4	372	9.07208e+06	3.11944e+06	1.87451e+07	1.39282e+07	9.34435e+06	8.67601e+06	1.15171e+07	1.29283e+07	1.53517e+07	1.48955e+07	2.0925e+07	2.24968e+07	0	1.98158e+07	5.59625e+06	0	0	1.52303e+07	995806	1.03553e+07	-0.31506	0.605641	-0.169706
Q92747	ARPC1A	Actin-related protein 2/3 complex subunit 1A OS=Homo sapiens OX=9606 GN=ARPC1A PE=2 SV=2	48	3	370	2.03653e+07	2.32282e+07	2.15914e+07	2.33975e+07	2.1596e+07	3.01052e+07	2.19058e+07	2.14522e+07	2.10816e+07	2.02955e+07	1.25527e+07	1.26203e+07	7.76151e+06	1.58618e+07	4.6633e+06	0	5.25806e+06	10793096	4.0221e+06	2.24285e+07	-1.46158	8.553e-05	-1.89956
Q5R3I4	TTC38	Tetratricopeptide repeat protein 38 OS=Homo sapiens OX=9606 GN=TTC38 PE=1 SV=1	48	10	469	4.38401e+07	6.55743e+07	7.65666e+06	3.47903e+07	2.71569e+07	2.5396e+07	12574888	1.90622e+07	3.30618e+07	1.2907e+07	0	0	2.94961e+06	0	4.49221e+06	0	0	0	2.5499e+07	3.52901e+07	-2.94584	0.00415416	-1.00944
Q13825	AUH	Methylglutaconyl-CoA hydratase, mitochondrial OS=Homo sapiens OX=9606 GN=AUH PE=1 SV=1	48	7	339	4.31212e+07	6.02957e+07	1.45305e+07	3.88373e+07	4.49916e+07	8.25836e+07	4.35252e+07	5.91973e+07	4.26029e+07	3.74458e+07	0	0	0	0	2.75471e+07	1.07314e+07	0	0	1.06018e+07	5.48702e+07	-3.1045	0.000106041	-1.59744
O14975	SLC27A2	Very long-chain acyl-CoA synthetase OS=Homo sapiens OX=9606 GN=SLC27A2 PE=1 SV=2	48	8	620	3.30643e+07	4.67305e+07	4.63151e+06	4.55248e+07	2.08279e+07	4.43818e+07	2.99559e+07	3.07274e+07	3.46368e+07	3.0383e+07	0	0	0	0	3.76994e+06	0	0	0	1.34635e+07	3.55714e+07	-4.06667	5.21519e-05	-1.85518
P24666	ACP1	Low molecular weight phosphotyrosine protein phosphatase OS=Homo sapiens OX=9606 GN=ACP1 PE=1 SV=3	47	4	158	1.94618e+07	2.64428e+07	4.80462e+07	1.97916e+07	5.08284e+07	7.81868e+07	4.15817e+07	2.36411e+07	1.98948e+07	1.8972e+07	1.90301e+07	1.99857e+07	2.93493e+07	1.59311e+07	1.34894e+08	3.84975e+08	1.0863e+07	2.08719e+07	2.13683e+07	1.75973e+07	1.07419	0.458456	0.284533
P27695	APEX1	DNA-(apurinic or apyrimidinic site) lyase OS=Homo sapiens OX=9606 GN=APEX1 PE=1 SV=2	47	7	318	1.35675e+07	1.48015e+07	1.47442e+07	8.40183e+06	16331190	7.34971e+06	1.17474e+07	1.12211e+07	1.91567e+07	1.07981e+07	2.50779e+07	2.51232e+07	4.04978e+07	28442962	0	1.58513e+07	1.68917e+07	3.2416e+07	2.17906e+07	1.07561e+07	0.837801	0.0576089	0.708085
Q15717	ELAVL1	ELAV-like protein 1 OS=Homo sapiens OX=9606 GN=ELAVL1 PE=1 SV=2	47	4	326	1.66562e+07	1.78365e+07	3.09392e+07	1.38333e+07	1.57883e+07	1.41085e+07	1.22409e+07	2.02158e+07	1.85157e+07	1.3697e+07	2.95527e+07	2.34256e+07	2.33131e+07	3.11238e+07	2.4278e+07	2.07042e+07	1.93217e+07	2.56523e+07	2.06686e+07	1.66136e+07	0.478907	0.0151303	0.771028
Q13404	UBE2V1	Ubiquitin-conjugating enzyme E2 variant 1 OS=Homo sapiens OX=9606 GN=UBE2V1 PE=1 SV=2	47	6	147	2.72171e+07	2.84912e+07	3.01891e+07	1.8781e+07	2.27253e+07	2.77679e+07	3.05356e+07	2.14545e+07	2.16102e+07	2.88847e+07	2.89078e+07	3.37027e+07	4.17373e+07	3.33238e+07	2.15713e+07	2.59753e+07	2.2178e+07	3.63748e+07	4.05061e+07	3.03656e+07	0.293851	0.0817847	0.529658
P62191	PSMC1	26S proteasome regulatory subunit 4 OS=Homo sapiens OX=9606 GN=PSMC1 PE=1 SV=1	47	5	440	2.26111e+07	1.76721e+07	3.01295e+07	2.37818e+07	2.50766e+07	2.5159e+07	2.08215e+07	1.58713e+07	1.45743e+07	1.60363e+07	1.624e+07	2.17883e+07	2.39687e+07	2.60664e+07	3.49592e+07	2.30449e+07	3.32574e+07	2.15473e+07	3.26018e+07	2.0131e+07	0.293014	0.134376	0.442091
P54920	NAPA	Alpha-soluble NSF attachment protein OS=Homo sapiens OX=9606 GN=NAPA PE=1 SV=3	47	8	295	3.27851e+07	2.10744e+07	3.21045e+07	2.63923e+07	1.65849e+07	2.37604e+07	2.95541e+07	2.92755e+07	6.12292e+07	3.46426e+07	2.96229e+07	3.13712e+07	1.9599e+07	5.64883e+07	2.05523e+07	4.6563e+07	4.43776e+07	3.40045e+07	3.40789e+07	2.62735e+07	0.194796	0.51129	0.194167
P20339	RAB5A	Ras-related protein Rab-5A OS=Homo sapiens OX=9606 GN=RAB5A PE=1 SV=2	47	4	215	3.26453e+06	5.2179e+06	0	6.79157e+06	1.88853e+06	0	8.47818e+06	5.75088e+06	3.78421e+06	7.27755e+06	2.99972e+06	3.37311e+06	7.95916e+06	4.5144e+06	0	3.75829e+06	7.33e+06	4.27328e+06	8.47968e+06	5.66671e+06	0.159943	0.760804	0.0922492
Q9H3G5	CPVL	Probable serine carboxypeptidase CPVL OS=Homo sapiens OX=9606 GN=CPVL PE=1 SV=2	47	6	476	1.46042e+07	8.21151e+06	5.40832e+07	1.55079e+07	2.85193e+07	1.20315e+07	2.02636e+07	3.62635e+07	2.15521e+07	9.97968e+06	2.34716e+07	3.57304e+07	4.41009e+07	1.5254e+07	1.70332e+07	3.84315e+06	6.78579e+06	2.88108e+07	2.96178e+07	3.08941e+07	0.0409905	0.93554	0.0245297
Q9Y6U3	SCIN	Adseverin OS=Homo sapiens OX=9606 GN=SCIN PE=1 SV=4	47	12	715	3.0299e+07	1.35793e+07	4.25919e+07	1.86301e+07	4.45113e+07	1.76498e+07	4.04854e+07	7.82761e+07	1.52306e+07	1.44415e+07	4.29019e+07	1.34655e+07	2.23565e+06	2.99338e+06	1.43013e+07	0	1.09669e+06	8.34654e+06	1.1164e+07	2.06902e+07	-1.55785	0.0379755	-0.652229
Q02338	BDH1	D-beta-hydroxybutyrate dehydrogenase, mitochondrial OS=Homo sapiens OX=9606 GN=BDH1 PE=1 SV=3	47	9	343	3.18716e+07	2.11717e+07	8.36618e+06	3.32316e+07	5.96027e+07	5.00838e+07	1.17777e+07	5.96157e+07	4.25373e+07	3.7484e+07	0	0	0	0	2.50657e+07	1.03231e+06	0	0	2.94815e+06	4.54452e+07	-3.46241	0.00101568	-1.29616
Q9UHI7	SLC23A1	Solute carrier family 23 member 1 OS=Homo sapiens OX=9606 GN=SLC23A1 PE=1 SV=3	47	6	598	3.75707e+07	6.35101e+07	0	1.62116e+07	4.45511e+07	4.15762e+07	2.61891e+07	6.17854e+07	4.17088e+07	3.83232e+07	0	0	0	0	0	0	0	0	1.75818e+06	3.71843e+07	-7.57084	0.000915767	-1.96315
Q16363	LAMA4	Laminin subunit alpha-4 OS=Homo sapiens OX=9606 GN=LAMA4 PE=1 SV=4	46	10	1823	622640	1.16176e+06	5.49551e+07	4.32575e+06	6.17549e+06	0	3.72346e+06	5.94187e+06	5.08062e+06	4.43967e+06	5.73447e+07	5.45163e+07	2.25594e+07	1.0681e+08	1.15715e+07	3.00274e+06	4.47669e+06	3.87816e+07	7.74557e+06	4.27476e+06	1.9798	0.109999	0.530447
P06737	PYGL	Glycogen phosphorylase, liver form OS=Homo sapiens OX=9606 GN=PYGL PE=1 SV=4	46	1	847	2.96528e+06	1.2008e+06	0	2.89538e+06	1.63313e+06	0	5.62684e+06	0	2.00676e+06	0	0	2.38254e+06	2.23484e+06	3.52683e+06	3.21794e+06	1.77565e+07	6.86757e+06	2.17703e+06	5.40252e+06	1.35891e+06	1.56784	0.133871	0.48068
P20340	RAB6A	Ras-related protein Rab-6A OS=Homo sapiens OX=9606 GN=RAB6A PE=1 SV=3	46	5	208	1.17126e+07	1.81553e+07	2.18104e+07	1.56542e+07	5.56075e+06	1.99248e+07	1.20597e+07	1.78354e+07	1.08112e+07	1.07678e+07	2.10039e+07	1.43658e+07	1.43801e+07	1.84021e+07	5.64756e+06	6.48538e+07	5.10574e+07	1.63572e+07	3.88107e+07	1.72643e+07	0.915078	0.142596	0.543848
Q9NYU2	UGGT1	UDP-glucose:glycoprotein glucosyltransferase 1 OS=Homo sapiens OX=9606 GN=UGGT1 PE=1 SV=3	46	8	1555	1.3231e+07	1.09044e+07	1.82418e+07	1.92834e+07	1.6332e+07	1.3624e+07	1.07512e+07	1.02061e+07	6.36333e+06	1.50445e+07	1.23214e+07	2.43063e+07	2.07141e+07	1.83453e+07	1.1205e+07	3.42386e+07	5.39095e+07	2.22289e+07	7.24932e+06	1.5138e+07	0.762198	0.13663	0.543652
P28482	MAPK1	Mitogen-activated protein kinase 1 OS=Homo sapiens OX=9606 GN=MAPK1 PE=1 SV=3	46	4	360	2.82183e+07	1.89813e+07	4.76275e+07	2.50653e+07	2.30912e+07	3.55669e+07	3.27887e+07	3.15286e+07	3.31426e+07	2.96098e+07	3.85783e+07	4.73132e+07	3.39013e+07	4.39726e+07	7.1486e+07	5.86931e+07	2.70104e+07	3.47137e+07	3.61016e+07	3.27519e+07	0.510271	0.0420371	0.630389
P55327	TPD52	Tumor protein D52 OS=Homo sapiens OX=9606 GN=TPD52 PE=1 SV=2	46	4	224	1.58016e+07	1.90224e+07	1.5132e+07	2.01213e+07	4.05927e+07	1.3263e+07	1.62544e+07	1.52645e+07	1.12155e+07	1.14468e+07	1.83024e+07	3.43278e+07	3.38475e+07	9.57706e+06	1.98255e+06	1.06158e+07	6.92687e+07	1.7598e+07	2.31859e+07	4.76258e+06	0.448191	0.437367	0.241085
Q8NC51	SERBP1	Plasminogen activator inhibitor 1 RNA-binding protein OS=Homo sapiens OX=9606 GN=SERBP1 PE=1 SV=2	46	3	408	4.89225e+06	5.71626e+06	2.1346e+07	8.49957e+06	1.40858e+07	3.62739e+06	5.60437e+06	6.87526e+06	1.0215e+07	6.78948e+06	1.45481e+07	1.16123e+07	1.45005e+07	1.22174e+07	7.92513e+06	8.74682e+06	1.27515e+07	1.21438e+07	1.08569e+07	6.58475e+06	0.416695	0.205436	0.407171
Q15435	PPP1R7	Protein phosphatase 1 regulatory subunit 7 OS=Homo sapiens OX=9606 GN=PPP1R7 PE=1 SV=1	46	5	360	1.48859e+07	1.97158e+07	1.46059e+07	2.14088e+07	2.34861e+07	1.08029e+07	1.94997e+07	1.65591e+07	1.77924e+07	1.57336e+07	1.33312e+07	2.32843e+07	3.53333e+07	9.37427e+06	1.07003e+07	5.91175e+06	1.40817e+07	1.99885e+07	1.68776e+07	1.36376e+07	-0.0769641	0.810809	-0.0764331
Q04837	SSBP1	Single-stranded DNA-binding protein, mitochondrial OS=Homo sapiens OX=9606 GN=SSBP1 PE=1 SV=1	46	3	148	2.27983e+07	2.08626e+07	1.6706e+07	1.80124e+07	2.26823e+07	2.06914e+07	1.56521e+07	2.34698e+07	1.80646e+07	1.6162e+07	1.79857e+07	1.72545e+07	1.38329e+07	1.56702e+07	1.45174e+07	1.66094e+07	1.81188e+07	1.56722e+07	1.34153e+07	2.09636e+07	-0.295437	0.0125787	-0.815604
Q9UEY8	ADD3	Gamma-adducin OS=Homo sapiens OX=9606 GN=ADD3 PE=1 SV=1	46	7	706	3.21859e+07	4.00885e+07	2.16348e+07	3.33579e+07	4.3773e+07	4.41394e+07	3.2189e+07	3.47283e+07	3.18773e+07	3.54e+07	3.19873e+07	1.92321e+07	9.74474e+06	3.43712e+07	0	2.98115e+06	5.49898e+06	5.86793e+06	2.14587e+07	2.95494e+07	-1.26164	0.0035801	-1.11554
P05090	APOD	Apolipoprotein D OS=Homo sapiens OX=9606 GN=APOD PE=1 SV=1	46	5	189	2.57924e+07	5.24881e+07	7.50879e+06	8.28517e+06	2.25158e+07	5.37295e+07	3.27799e+07	4.21201e+07	3.94203e+07	1.61153e+08	2.51613e+07	2.49052e+06	8.97596e+06	2.39532e+07	1.29835e+07	1.77989e+07	9.05057e+06	1.79162e+07	2.35994e+07	23459228	-1.4992	0.114006	-0.585343
P31153	MAT2A	S-adenosylmethionine synthase isoform type-2 OS=Homo sapiens OX=9606 GN=MAT2A PE=1 SV=1	46	4	395	4.07598e+07	3.96693e+07	1.99525e+07	2.83489e+07	2.57878e+07	4.89968e+07	3.67081e+07	4.17985e+07	4.1073e+07	4.33385e+07	8.31804e+06	1.37115e+07	1.01153e+07	8.10512e+06	8.82012e+06	1.14931e+07	1.39186e+07	1.45746e+07	2.25112e+07	2.47029e+07	-1.56363	2.83443e-05	-1.88631
Q9BPW8	NIPSNAP1	Protein NipSnap homolog 1 OS=Homo sapiens OX=9606 GN=NIPSNAP1 PE=1 SV=1	46	6	284	1.09442e+08	1.01164e+08	2.68267e+07	6.4364e+07	5.08953e+07	1.30395e+08	9.5793e+07	7.58707e+07	6.89304e+07	9.86446e+07	1.05273e+07	1.39321e+07	6.16222e+06	7.84267e+06	0	4.25554e+06	1.31884e+06	8.89568e+06	4.25846e+07	8.6174e+07	-2.95385	0.000168581	-1.74176
P13866	SLC5A1	Sodium/glucose cotransporter 1 OS=Homo sapiens OX=9606 GN=SLC5A1 PE=1 SV=1	46	8	664	1.13037e+07	4.73601e+07	7.48039e+06	1.85724e+07	4.78434e+07	3.55617e+07	1.43699e+07	3.63415e+07	8.29487e+07	4.70442e+07	0	2.25789e+06	0	0	6.43605e+06	2.77947e+06	0	0	4.91012e+06	2.38752e+07	-4.26019	0.00444096	-1.36727
Q13113	PDZK1IP1	PDZK1-interacting protein 1 OS=Homo sapiens OX=9606 GN=PDZK1IP1 PE=1 SV=1	46	4	114	4.05551e+07	1.06491e+08	2.21093e+07	4.54095e+07	1.20344e+08	6.76975e+07	8.09115e+07	2.80128e+07	1.12144e+08	7.35549e+07	0	0	0	0	0	0	0	0	2.38077e+07	3.65533e+07	-4.72013	0.000855362	-1.63177
P39023	RPL3	60S ribosomal protein L3 OS=Homo sapiens OX=9606 GN=RPL3 PE=1 SV=2	45	9	403	1.74407e+07	1.47e+07	1.96608e+07	1.93359e+07	8.72867e+06	1.20475e+07	2.93681e+07	2.28196e+07	1.86258e+07	2.09331e+07	5.83158e+07	5.33496e+07	5.34808e+07	5.13711e+07	7.6572e+06	3.65681e+07	5.50031e+07	4.67198e+07	4.29493e+07	2.76007e+07	1.29436	0.000557097	1.32705
Q96G03	PGM2	Phosphoglucomutase-2 OS=Homo sapiens OX=9606 GN=PGM2 PE=1 SV=4	45	9	612	2.10789e+07	1.57678e+07	4.04837e+07	2.654e+07	3.63906e+07	2.18596e+07	2.16901e+07	1.40486e+07	1.73878e+07	5.06336e+06	3.07178e+07	4.16432e+07	6.77581e+07	4.56925e+07	9.0314e+07	2.99401e+07	6.77222e+07	4.72339e+07	4.98838e+07	2.37217e+07	1.2479	0.0020118	1.06698
Q96PK6	RBM14	RNA-binding protein 14 OS=Homo sapiens OX=9606 GN=RBM14 PE=1 SV=2	45	7	669	1.7558e+07	9.57015e+06	2.9097e+08	4.32346e+07	1.15334e+08	4.98045e+07	6.09082e+07	1.66266e+07	1.42307e+07	9.7724e+06	7.52885e+06	2.54245e+07	3.00012e+07	3.58936e+07	7.78276e+08	2.13761e+08	1.9442e+08	2.39945e+07	2.34049e+07	2.01402e+07	1.2375	0.396942	0.269079
P07357	C8A	Complement component C8 alpha chain OS=Homo sapiens OX=9606 GN=C8A PE=1 SV=2	45	5	584	1.50369e+07	4.838e+06	7.85427e+06	1.31216e+07	2.02996e+07	3.13845e+06	1.19616e+07	2.63648e+07	3.22343e+07	1.47711e+07	3.15742e+07	1.76634e+07	2.17819e+07	5.72391e+07	1.07385e+07	23269814	0	4.55899e+07	8.72472e+06	1.41453e+07	0.685603	0.24602	0.351197
Q9UQ80	PA2G4	Proliferation-associated protein 2G4 OS=Homo sapiens OX=9606 GN=PA2G4 PE=1 SV=3	45	10	394	1.94418e+07	1.75172e+07	3.05601e+07	2.19266e+07	3.11102e+07	3.04245e+07	1.70063e+07	2.62939e+07	2.54867e+07	1.64141e+07	3.66801e+07	3.9953e+07	4.98531e+07	3.42373e+07	2.16925e+07	2.84141e+07	4.51329e+07	4.46726e+07	4.02941e+07	3.03192e+07	0.681583	0.00228824	1.02627
O75340	PDCD6	Programmed cell death protein 6 OS=Homo sapiens OX=9606 GN=PDCD6 PE=1 SV=1	45	3	191	1.10483e+07	9.90552e+06	2.55176e+07	1.3941e+07	2.14205e+07	8.93945e+06	7.94567e+06	2.26519e+07	1.16462e+07	1.40152e+07	2.50929e+07	2.10797e+07	1.1854e+07	2.7534e+07	0	1.39101e+07	1.26306e+07	1.85502e+07	1.30885e+07	1.44443e+07	0.119342	0.760237	0.0924974
P61006	RAB8A	Ras-related protein Rab-8A OS=Homo sapiens OX=9606 GN=RAB8A PE=1 SV=1	45	4	207	7.37158e+06	8.22358e+06	1.17233e+07	8.04983e+06	7.59679e+06	7.72725e+06	1.02576e+07	6.26692e+06	6.87922e+06	4.19796e+06	0	4.58292e+06	1.10054e+07	7.27506e+06	7.70192e+06	9.3414e+06	8.26593e+06	1.38331e+06	1.42714e+07	5.33834e+06	-0.142723	0.701882	-0.118845
P16278	GLB1	Beta-galactosidase OS=Homo sapiens OX=9606 GN=GLB1 PE=1 SV=2	45	5	677	3.44116e+07	2.80205e+07	3.8019e+07	2.2122e+07	2.67935e+07	2.73085e+07	2.52317e+07	41350818	3.10575e+07	3.41158e+07	9.30971e+06	1.03762e+07	1.99975e+07	8.45644e+06	2.93001e+07	1.81535e+07	2.72949e+07	1.82904e+07	1.65961e+07	5.04406e+07	-0.815077	0.00191285	-1.04348
P80297	MT1X	Metallothionein-1X OS=Homo sapiens OX=9606 GN=MT1X PE=1 SV=1	45	1	61	6.43051e+06	2.40549e+06	0	0	0	8.81384e+06	3.02412e+06	0	0	0	0	0	0	0	0	0	0	0	1.05701e+07	5.5686e+06	-0.815817	0.635419	-0.140792
Q9UHQ9	CYB5R1	NADH-cytochrome b5 reductase 1 OS=Homo sapiens OX=9606 GN=CYB5R1 PE=1 SV=1	45	8	305	5.41488e+07	4.01336e+07	3.05279e+07	3.51909e+07	2.85433e+07	4.15193e+07	5.40944e+07	4.80532e+07	4.55736e+07	4.65716e+07	2.43095e+07	1.7423e+07	8.34601e+06	1.3271e+07	5.76306e+07	13581045	1.46355e+07	1.32649e+07	1.81464e+07	5.02266e+07	-1.08041	0.00300457	-0.997515
P11234	RALB	Ras-related protein Ral-B OS=Homo sapiens OX=9606 GN=RALB PE=1 SV=1	45	3	206	2.05558e+07	2.88441e+07	1.71346e+07	1.94022e+07	2.51661e+07	3.14688e+07	2.28973e+07	2.53407e+07	2.56925e+07	2.68121e+07	8.29518e+06	9.2957e+06	6.20024e+06	5.624e+06	0	1.46209e+07	1.19287e+07	1.40239e+06	2.53678e+07	1.81598e+07	-1.40425	0.000368678	-1.33235
O95299	NDUFA10	NADH dehydrogenase [ubiquinone] 1 alpha subcomplex subunit 10, mitochondrial OS=Homo sapiens OX=9606 GN=NDUFA10 PE=1 SV=1	45	8	355	4.26935e+07	3.30724e+07	1.97653e+07	2.60512e+07	4.38027e+07	4.29554e+07	5.42157e+07	4.30428e+07	4.94597e+07	4.4873e+07	0	6.80587e+06	0	1.66886e+06	0	0	1.61016e+06	2.26701e+06	1.38906e+07	4.06013e+07	-3.77777	9.42648e-06	-2.57074
Q9BX68	HINT2	Histidine triad nucleotide-binding protein 2, mitochondrial OS=Homo sapiens OX=9606 GN=HINT2 PE=1 SV=1	45	5	163	7.7911e+07	6.55691e+07	2.34601e+07	5.50474e+07	7.27155e+07	7.90881e+07	5.9811e+07	8.18688e+07	3.28711e+07	8.34512e+07	2.83343e+06	6.05146e+06	0	0	0	0	0	0	1.48003e+07	6.48688e+07	-4.5854	5.89367e-05	-2.47333
P04003	C4BPA	C4b-binding protein alpha chain OS=Homo sapiens OX=9606 GN=C4BPA PE=1 SV=2	44	8	597	1.05107e+07	3.01003e+06	3.00583e+07	9.94607e+06	1.17242e+08	9.25067e+06	1.70808e+07	1.53441e+07	4.78649e+07	1.31427e+07	8.57246e+07	4.31357e+07	4.61425e+07	1.36279e+08	1.04106e+08	2.30218e+08	77051261	9.06078e+07	1.40491e+07	2.01933e+06	1.74916	0.0261807	0.701782
Q07020	RPL18	60S ribosomal protein L18 OS=Homo sapiens OX=9606 GN=RPL18 PE=1 SV=2	44	5	188	2.98169e+07	2.52721e+07	8.79692e+07	3.50395e+07	3.75807e+07	4.72324e+07	3.40021e+07	3.25511e+07	2.89192e+07	2.83789e+07	5.78442e+07	6.7023e+07	1.09578e+08	8.60659e+07	1.39284e+08	1.12163e+08	1.26028e+08	1.1495e+08	4.65863e+07	3.43768e+07	1.30409	0.00205956	1.18388
P27635	RPL10	60S ribosomal protein L10 OS=Homo sapiens OX=9606 GN=RPL10 PE=1 SV=4	44	6	214	1.39282e+07	4.78351e+06	1.8526e+07	1.36168e+07	6.74925e+06	4.20001e+06	1.20664e+07	2.08895e+07	1.76805e+07	1.70713e+07	2.68785e+07	4.02933e+07	3.58522e+07	3.65661e+07	6.26218e+06	2.0811e+07	3.75065e+07	3.68161e+07	2.79145e+07	1.52093e+07	1.20599	0.00200507	1.06478
Q8N163	CCAR2	Cell cycle and apoptosis regulator protein 2 OS=Homo sapiens OX=9606 GN=CCAR2 PE=1 SV=2	44	11	923	1.12901e+07	7.40428e+06	3.44704e+07	1.83745e+07	1.84258e+07	6.34846e+06	9.90104e+06	1.81418e+07	1.09799e+07	1.03934e+07	2.6322e+07	2.32941e+07	2.87184e+07	4.36949e+07	2.905e+07	2.66955e+07	2.14431e+07	3.86529e+07	9.96806e+06	1.07111e+07	0.91811	0.0145918	0.761344
Q8IUX7	AEBP1	Adipocyte enhancer-binding protein 1 OS=Homo sapiens OX=9606 GN=AEBP1 PE=1 SV=1	44	10	1158	1.24615e+07	2.87856e+06	4.17585e+07	3.08149e+07	2.60266e+07	1.68067e+07	2.48478e+07	3.35633e+07	3.72876e+07	3.86934e+07	8.23074e+07	6.59164e+07	1.06851e+07	4.04851e+07	3.30772e+07	5.1913e+07	7.90854e+07	7.3511e+07	1.36777e+07	2.08129e+07	0.91729	0.0660652	0.62653
P55735	SEC13	Protein SEC13 homolog OS=Homo sapiens OX=9606 GN=SEC13 PE=1 SV=3	44	4	322	1.97428e+07	1.99872e+07	1.75859e+07	2.07755e+07	2.77329e+06	1.31598e+07	1.68469e+07	2.09748e+07	1.67284e+07	1.94929e+07	3.47836e+07	2.59835e+07	2.91969e+07	2.33527e+07	6.58653e+06	1.59864e+07	4.95304e+07	2.61779e+07	2.29217e+07	2.02072e+07	0.63267	0.0719178	0.563264
Q9BX66	SORBS1	Sorbin and SH3 domain-containing protein 1 OS=Homo sapiens OX=9606 GN=SORBS1 PE=1 SV=3	44	8	1292	6.03788e+06	8.94512e+06	1.35647e+07	1.94503e+07	1.59449e+07	4.98965e+06	8.93676e+06	9.53411e+06	1.83102e+07	3.02936e+07	76716160	2.61652e+07	3.15876e+06	2.32261e+07	0	0	0	4.21434e+07	1.66323e+06	1.07748e+07	0.499698	0.62024	0.174993
P02795	MT2A	Metallothionein-2 OS=Homo sapiens OX=9606 GN=MT2A PE=1 SV=1	44	1	61	3.41247e+06	0	0	0	0	7.85184e+06	0	0	0	0	0	0	0	0	0	0	0	0	1.16835e+07	4.74719e+06	0.204715	0.927023	0.0279987
P04216	THY1	Thy-1 membrane glycoprotein OS=Homo sapiens OX=9606 GN=THY1 PE=1 SV=2	44	3	161	3.24022e+07	32969704	6.70905e+07	1.72051e+07	1.0489e+08	1.65594e+07	3.82588e+07	2.582e+07	3.12585e+07	3.06453e+07	5.3856e+07	5.17279e+07	2.58991e+07	2.32316e+07	5.52654e+07	1.43244e+07	7.31638e+07	2.68685e+07	1.23399e+07	1.81334e+07	-0.0861352	0.866871	-0.0503724
P61020	RAB5B	Ras-related protein Rab-5B OS=Homo sapiens OX=9606 GN=RAB5B PE=1 SV=1	44	2	215	5.12101e+06	4.00144e+06	6.96428e+06	1.04814e+07	4.43426e+06	5.02161e+06	8.82909e+06	1.33906e+07	9.38931e+06	4.74976e+06	5.39014e+06	9.27919e+06	2.41957e+06	6.73187e+06	8.78758e+06	1.16259e+07	4.01072e+06	7.98518e+06	4.77351e+06	9.18399e+06	-0.0947465	0.789552	-0.0801835
Q9NYL9	TMOD3	Tropomodulin-3 OS=Homo sapiens OX=9606 GN=TMOD3 PE=1 SV=1	44	6	352	2.40681e+07	2.25527e+07	3.31472e+07	2.22359e+07	2.21247e+07	1.48279e+07	2.1565e+07	2.43498e+07	2.35347e+07	2.27125e+07	1.72959e+07	3.0819e+07	2.05544e+07	1.71678e+07	0	4.93141e+06	9.5562e+06	3.06524e+07	2.86276e+07	2.40364e+07	-0.382127	0.277044	-0.363424
O94875	SORBS2	Sorbin and SH3 domain-containing protein 2 OS=Homo sapiens OX=9606 GN=SORBS2 PE=1 SV=3	44	9	1100	1.38024e+07	1.18567e+07	3.63069e+07	3.09492e+07	1.04901e+07	1.16208e+07	19916426	2.70184e+07	3.69321e+07	4.16484e+07	1.88986e+07	4.44904e+07	9.31762e+06	1.32781e+07	3.15189e+06	0	0	4.79749e+07	1.1452e+07	2.36157e+07	-0.543204	0.366051	-0.266418
Q13057	COASY	Bifunctional coenzyme A synthase OS=Homo sapiens OX=9606 GN=COASY PE=1 SV=4	44	6	564	3.72944e+07	2.81282e+07	1.05825e+07	3.28505e+07	4.87167e+07	5.6174e+07	3.58346e+07	3.61429e+07	3.37503e+07	3.29281e+07	2.53917e+06	5.17942e+06	7.40038e+06	3.02745e+06	1.29851e+07	2.09921e+07	1.02245e+07	6.10192e+06	38380124	3.48438e+07	-1.5699	0.00182508	-1.05239
O00515	LAD1	Ladinin-1 OS=Homo sapiens OX=9606 GN=LAD1 PE=1 SV=2	44	9	517	1.80138e+07	1.31644e+07	5.52349e+06	6.82851e+06	4.81761e+06	1.94353e+07	9.31799e+06	9.52908e+06	1.05809e+07	9.193e+06	0	1.37286e+06	0	0	6.94957e+06	1.87694e+06	1.67414e+06	1.98839e+06	1.4291e+07	1.21649e+07	-1.76619	0.00932176	-0.825814
Q96FV2	SCRN2	Secernin-2 OS=Homo sapiens OX=9606 GN=SCRN2 PE=1 SV=3	44	6	425	5.4825e+07	5.34621e+07	1.10464e+07	2.35121e+07	2.66036e+07	5.83992e+07	4.16066e+07	3.207e+07	5.27273e+07	4.02404e+07	4.21204e+06	1.11985e+07	1.89461e+06	7.58488e+06	0	5.99713e+06	9.29271e+06	3.89509e+06	2.00061e+07	3.19427e+07	-2.47002	0.000451675	-1.56582
Q9H6S3	EPS8L2	Epidermal growth factor receptor kinase substrate 8-like protein 2 OS=Homo sapiens OX=9606 GN=EPS8L2 PE=1 SV=2	44	11	715	3.74674e+07	3.63982e+07	1.55901e+07	2.55886e+07	3.26332e+07	3.28692e+07	3.12036e+07	4.12794e+07	2.56021e+07	3.17905e+07	0	0	0	0	0	0	0	0	1.99959e+07	3.41547e+07	-3.80445	4.31497e-06	-2.18214
Q86YB7	ECHDC2	Enoyl-CoA hydratase domain-containing protein 2, mitochondrial OS=Homo sapiens OX=9606 GN=ECHDC2 PE=1 SV=2	44	6	292	6.38251e+07	6.42172e+07	2.36617e+07	5.06248e+07	4.19785e+07	1.22709e+08	5.1144e+07	5.35042e+07	4.20986e+07	5.82784e+07	0	0	0	0	0	0	0	0	6.45526e+06	5.03436e+07	-6.3175	0.000457437	-2.1193
Q9NZM1	MYOF	Myoferlin OS=Homo sapiens OX=9606 GN=MYOF PE=1 SV=1	43	10	2061	1.07879e+07	4.47988e+06	2.94964e+07	8.63677e+06	7.10732e+06	4.68118e+06	8.09524e+06	1.12568e+07	8.84143e+06	1.3418e+07	6.07967e+07	3.02994e+07	3.96268e+07	4.34063e+07	3.3548e+07	7.77471e+07	3.96504e+07	6.49675e+07	4.28011e+07	9.05884e+06	2.17092	0.000365207	1.70943
Q07507	DPT	Dermatopontin OS=Homo sapiens OX=9606 GN=DPT PE=1 SV=2	43	3	201	1.07382e+07	1.5342e+07	5.95259e+07	2.11953e+07	3.85005e+07	1.16479e+07	1.24381e+07	3.29633e+07	1.70176e+07	2.15648e+07	1.56959e+08	2.97655e+07	1.97028e+07	9.81827e+07	1.01733e+08	7.62125e+07	2.4396e+07	7.0771e+07	2.00844e+07	1.21426e+07	1.46305	0.0548892	0.712612
Q15056	EIF4H	Eukaryotic translation initiation factor 4H OS=Homo sapiens OX=9606 GN=EIF4H PE=1 SV=5	43	6	248	1.58533e+07	1.80991e+07	2.30816e+07	2.45402e+07	2.30227e+07	1.57043e+07	1.41907e+07	1.8696e+07	1.42358e+07	1.83725e+07	3.51644e+07	2.8069e+07	4.33159e+07	3.00033e+07	6.71715e+07	1.16792e+08	3.90523e+07	2.66824e+07	2.76584e+07	2.21047e+07	1.30759	0.0454178	0.874923
Q92930	RAB8B	Ras-related protein Rab-8B OS=Homo sapiens OX=9606 GN=RAB8B PE=1 SV=2	43	2	207	2.96202e+06	2.57587e+06	7.13022e+06	4.97935e+06	5.91746e+06	0	6.31239e+06	5.7446e+06	4.08049e+06	3.27065e+06	8.36804e+06	8.75945e+06	8.91142e+06	8.41634e+06	3.36056e+06	2.2096e+07	6.21858e+06	6.13445e+06	5.50407e+06	4.79056e+06	1.00777	0.0564021	0.611199
P61313	RPL15	60S ribosomal protein L15 OS=Homo sapiens OX=9606 GN=RPL15 PE=1 SV=2	43	5	204	3.14858e+07	3.15162e+07	5.94809e+07	4.8951e+07	5.68436e+07	6.00697e+07	4.71651e+07	3.94736e+07	3.23878e+07	3.32454e+07	5.25196e+07	7.02583e+07	7.65314e+07	7.48214e+07	1.35345e+08	1.0443e+08	1.41588e+08	6.78062e+07	4.33702e+07	3.6719e+07	0.951077	0.0170229	0.935469
P62244	RPS15A	40S ribosomal protein S15a OS=Homo sapiens OX=9606 GN=RPS15A PE=1 SV=2	43	5	130	2.20786e+07	1.68006e+07	2.01968e+07	1.86948e+07	1.16892e+07	2.52882e+06	2.47362e+07	2.19833e+07	1.71585e+07	2.16641e+07	3.87031e+07	4.13503e+07	1.54951e+07	2.39411e+07	2.62807e+07	3.16286e+07	2.79696e+07	2.98982e+07	3.14973e+07	1.83097e+07	0.739497	0.00581714	0.88744
Q13765	NACA	Nascent polypeptide-associated complex subunit alpha OS=Homo sapiens OX=9606 GN=NACA PE=1 SV=1	43	4	215	1.77992e+07	1.69681e+07	2.47145e+07	1.64149e+07	1.50181e+07	1.63128e+07	1.53612e+07	1.49346e+07	1.95259e+07	1.51153e+07	3.45644e+07	2.27512e+07	3.56379e+07	2.23562e+07	1.92648e+07	1.44619e+07	1.3621e+07	2.39436e+07	2.8662e+07	1.69606e+07	0.474315	0.0661265	0.653117
P10301	RRAS	Ras-related protein R-Ras OS=Homo sapiens OX=9606 GN=RRAS PE=1 SV=1	43	4	218	1.93042e+07	2.32996e+07	2.5463e+07	3.14435e+07	1.69651e+07	1.79488e+07	2.71675e+07	2.81383e+07	3.06572e+07	3.41014e+07	4.37048e+07	5.24517e+07	3.46412e+07	2.71514e+07	2.97592e+07	1.06661e+07	1.62378e+07	3.52096e+07	2.7555e+07	2.38091e+07	0.276249	0.320157	0.303112
P50135	HNMT	Histamine N-methyltransferase OS=Homo sapiens OX=9606 GN=HNMT PE=1 SV=1	43	4	292	1.64048e+07	2.76089e+07	1.33702e+07	1.65892e+07	1.42864e+07	1.88684e+07	1.74369e+07	1.24741e+07	1.24562e+07	2.17601e+07	1.39161e+07	8.7892e+06	1.5008e+07	1.05416e+07	1.51169e+07	6.04458e+06	1.2457e+07	8.15553e+06	1.65954e+07	1.07907e+07	-0.531608	0.031522	-0.666619
Q96HY7	DHTKD1	Probable 2-oxoglutarate dehydrogenase E1 component DHKTD1, mitochondrial OS=Homo sapiens OX=9606 GN=DHTKD1 PE=1 SV=2	43	8	919	3.89937e+07	4.39185e+07	9.33397e+06	1.55034e+07	2.41008e+07	5.30735e+07	3.39256e+07	3.64209e+07	1.8485e+07	3.76342e+07	0	776605	3.97463e+06	1.54125e+06	1.06712e+08	1.20834e+07	3.04825e+07	2.8349e+06	6.42593e+06	3.29395e+07	-0.765727	0.366346	-0.281235
Q9H0E2	TOLLIP	Toll-interacting protein OS=Homo sapiens OX=9606 GN=TOLLIP PE=1 SV=1	43	4	274	2.257e+07	2.58935e+07	2.73124e+07	2.39248e+07	2.75647e+07	2.13644e+07	2.23673e+07	2.6729e+07	2.40433e+07	2.20355e+07	5.80291e+06	1.02361e+07	6.00965e+06	7.4551e+06	3.37786e+06	9.70375e+06	8.03195e+06	1.16158e+07	1.79291e+07	1.85544e+07	-1.45273	1.56381e-06	-2.49998
O43678	NDUFA2	NADH dehydrogenase [ubiquinone] 1 alpha subcomplex subunit 2 OS=Homo sapiens OX=9606 GN=NDUFA2 PE=1 SV=3	43	5	99	4.15948e+07	4.77886e+07	1.52793e+07	2.5831e+07	4.68897e+07	4.51962e+07	3.23895e+07	4.51454e+07	3.39848e+07	3.70159e+07	5.87125e+06	3.13183e+06	3.36345e+06	0	1.67248e+07	0	1.96043e+06	0	1.27053e+07	3.33888e+07	-2.93228	1.16205e-05	-2.06289
Q93099	HGD	Homogentisate 1,2-dioxygenase OS=Homo sapiens OX=9606 GN=HGD PE=1 SV=2	43	11	445	5.70148e+07	7.94589e+07	7.63593e+06	5.27932e+07	5.00051e+07	6.22798e+07	5.07748e+07	5.20759e+07	5.40339e+07	5.31901e+07	0	0	0	0	0	0	0	0	2.15042e+07	5.18586e+07	-4.44177	1.68111e-05	-2.09164
O43895	XPNPEP2	Xaa-Pro aminopeptidase 2 OS=Homo sapiens OX=9606 GN=XPNPEP2 PE=1 SV=3	43	9	674	3.28414e+07	9.02437e+07	1.64443e+07	4.88941e+06	1.91685e+07	6.49575e+07	3.06966e+07	5.58651e+07	3.27842e+07	6.70697e+07	5.4551e+06	0	0	0	0	0	0	0	0	3.38678e+07	-6.09722	0.00329306	-1.50053
Q9NYQ3	HAO2	Hydroxyacid oxidase 2 OS=Homo sapiens OX=9606 GN=HAO2 PE=1 SV=1	42	7	351	3.82444e+07	4.36115e+07	1.49676e+07	1.92635e+07	2.87517e+07	7.66551e+07	3.22628e+07	3.82609e+07	2.92213e+07	5.82327e+07	0	0	0	0	0	0	0	0	0	3.29174e+07	-inf	0.000600385	-2.18643
P31949	S100A11	Protein S100-A11 OS=Homo sapiens OX=9606 GN=S100A11 PE=1 SV=2	42	5	105	5.11131e+07	4.46719e+07	1.79041e+08	6.87025e+07	9.88614e+07	3.95702e+07	5.69166e+07	4.33606e+07	3.3627e+07	4.10722e+07	1.52364e+08	1.66844e+08	361674374	2.21359e+08	3.71903e+08	4.63407e+08	5.11767e+08	1.8622e+08	2.40567e+08	5.81755e+07	2.17831	0.00239467	1.38107
P62266	RPS23	40S ribosomal protein S23 OS=Homo sapiens OX=9606 GN=RPS23 PE=1 SV=3	42	3	143	1.99003e+07	1.92235e+07	3.5021e+07	3.03167e+07	3.25178e+07	1.59962e+07	3.04563e+07	2.61498e+07	1.97044e+07	2.58063e+07	1.10491e+08	4.60604e+07	6.63256e+07	5.00298e+07	6.79397e+07	8.48179e+07	8.26878e+07	6.87271e+07	4.56277e+07	1.92297e+07	1.43954	0.000923446	1.66809
P46977	STT3A	Dolichyl-diphosphooligosaccharide--protein glycosyltransferase subunit STT3A OS=Homo sapiens OX=9606 GN=STT3A PE=1 SV=2	42	5	705	7.16248e+06	7.10062e+06	1.24948e+07	1.1965e+07	1.0914e+07	8.92209e+06	6.60259e+06	1.07227e+07	9.85246e+06	7.11727e+06	2.16872e+07	2.79663e+07	1.5092e+07	1.68634e+07	1.36926e+07	2.75036e+07	4.45223e+07	2.11672e+07	5.18112e+06	1.09306e+07	1.21261	0.0241647	0.96918
P07477	PRSS1	Trypsin-1 OS=Homo sapiens OX=9606 GN=PRSS1 PE=1 SV=1	42	2	247	2.2399e+08	342565607	1.17065e+08	1.83562e+08	2.43851e+08	3.99892e+08	1.52217e+08	3.23523e+08	2.59906e+08	2.11466e+08	4.6448e+08	2.32848e+08	6.05855e+08	4.1743e+08	2.37187e+08	4.68065e+08	4.48839e+08	3.61022e+08	2.29329e+08	3.08888e+08	0.647374	0.0293156	0.672028
Q9BWM7	SFXN3	Sideroflexin-3 OS=Homo sapiens OX=9606 GN=SFXN3 PE=1 SV=3	42	5	321	1.74542e+07	4.8331e+06	1.35511e+07	1.84732e+07	7.22328e+06	1.20203e+07	1.03642e+07	1.4154e+07	3.3945e+06	2.35578e+07	1.09625e+07	1.02864e+07	2.31285e+06	1.28685e+07	2.13122e+07	2.63026e+07	2.01447e+07	1.4571e+07	1.09068e+07	1.86879e+07	0.204598	0.614837	0.14917
P09496	CLTA	Clathrin light chain A OS=Homo sapiens OX=9606 GN=CLTA PE=1 SV=1	42	6	248	2.93451e+07	3.93274e+07	2.79095e+07	4.30126e+07	5.73734e+07	3.53208e+07	3.25065e+07	3.25594e+07	2.5251e+07	2.45007e+07	2.64209e+07	2.28324e+07	3.96224e+07	2.33978e+07	4.16279e+07	4.01974e+07	3.88305e+07	2.88066e+07	3.74952e+07	2.62058e+07	-0.0621141	0.77428	-0.0875965
Q5JWF2	GNAS	Guanine nucleotide-binding protein G(s) subunit alpha isoforms XLas OS=Homo sapiens OX=9606 GN=GNAS PE=1 SV=2	42	6	1037	1.73238e+07	1.53347e+07	2.52873e+07	2.09714e+07	1.51027e+07	1.25732e+07	2.083e+07	2.41577e+07	2.32871e+07	1.92993e+07	3.28163e+07	2.10619e+07	1.10736e+07	1.68756e+07	0	9.10655e+06	1.36238e+07	1.5906e+07	1.0656e+07	1.84452e+07	-0.41441	0.206076	-0.386233
P06865	HEXA	Beta-hexosaminidase subunit alpha OS=Homo sapiens OX=9606 GN=HEXA PE=1 SV=2	42	7	529	2.64545e+07	3.04516e+07	3.61995e+07	6.15682e+07	4.87385e+07	2.16446e+07	2.0524e+07	2.65221e+07	1.62517e+07	2.34633e+07	1.77287e+07	1.84571e+07	4.09413e+07	1.33847e+07	1.76373e+07	8.37254e+06	3.49974e+07	2.01805e+07	3.509e+07	3.03988e+07	-0.440537	0.246816	-0.342845
Q9H2U2	PPA2	Inorganic pyrophosphatase 2, mitochondrial OS=Homo sapiens OX=9606 GN=PPA2 PE=1 SV=2	42	6	334	4.37728e+07	6.13439e+07	2.46076e+07	2.4251e+07	2.30874e+07	1.84084e+07	3.55636e+07	3.51573e+07	3.43707e+07	3.59513e+07	2.39736e+07	1.83942e+07	1.10901e+07	1.63665e+07	1.804e+07	1.22686e+07	1.0296e+07	2.1693e+07	2.4396e+07	4.2912e+07	-0.952335	0.006208	-0.964258
Q9P0Z9	PIPOX	Peroxisomal sarcosine oxidase OS=Homo sapiens OX=9606 GN=PIPOX PE=1 SV=2	42	7	390	5.66167e+07	6.13993e+07	1.34487e+07	2.04361e+07	3.8401e+07	6.56568e+07	3.8334e+07	2.30893e+07	1.88306e+07	6.30452e+07	0	0	0	0	0	0	0	0	3.82515e+06	3.19643e+07	-6.55366	0.00086797	-1.92046
Q9NRV9	HEBP1	Heme-binding protein 1 OS=Homo sapiens OX=9606 GN=HEBP1 PE=1 SV=1	41	5	189	1.75823e+07	1.83285e+07	5.7487e+07	2.7047e+07	4.56003e+07	2.23051e+07	1.20524e+07	2.22499e+07	1.78032e+07	1.92401e+07	5.80551e+07	7.14149e+07	2.01618e+08	7.72709e+07	320885998	166592437	2.74887e+08	8.48952e+07	6.30011e+07	3.16795e+07	2.49614	0.0158026	1.12164
Q92522	H1-10	Histone H1x OS=Homo sapiens OX=9606 GN=H1FX PE=1 SV=1	41	5	213	1.71076e+07	1.35976e+07	6.33764e+07	2.41478e+07	2.52051e+07	1.28068e+07	2.23276e+07	2.51291e+07	2.65559e+07	2.16325e+07	1.01071e+08	8.47143e+07	102132671	7.85402e+07	8.50596e+07	4.36111e+07	5.79826e+07	6.87518e+07	3.39307e+07	2.87138e+07	1.53247	0.000388375	1.3202
P55209	NAP1L1	Nucleosome assembly protein 1-like 1 OS=Homo sapiens OX=9606 GN=NAP1L1 PE=1 SV=1	41	4	391	6.95962e+06	6.09375e+06	1.01423e+07	9.64228e+06	7.75581e+06	0	9.8535e+06	5.9362e+06	4.36441e+06	1.27497e+07	2.53e+07	1.59491e+07	3.36582e+07	2.80387e+07	2.27295e+07	8.74553e+06	1.94879e+07	1.69812e+07	1.53222e+07	1.18103e+07	1.49318	0.00197931	1.26816
Q66K66	TMEM198	Transmembrane protein 198 OS=Homo sapiens OX=9606 GN=TMEM198 PE=1 SV=1	41	1	360	8.38009e+07	3.70817e+07	1.0913e+08	5.6949e+06	8.93012e+07	2.03299e+08	4.30796e+07	6.01953e+07	2.11874e+08	8.58108e+07	4.62549e+07	6.1044e+07	3.40573e+07	1.54448e+08	1374039916	9.99158e+07	2.03499e+08	1.39327e+08	3.50316e+07	3.53133e+07	1.36058	0.378102	0.310423
P53999	SUB1	Activated RNA polymerase II transcriptional coactivator p15 OS=Homo sapiens OX=9606 GN=SUB1 PE=1 SV=3	41	5	127	2.01546e+07	2.38487e+07	3.21666e+07	1.80039e+07	2.07821e+07	1.566e+07	2.34131e+07	2.7938e+07	2.36125e+07	2.01468e+07	2.01542e+07	7.20568e+07	9.71871e+07	5.52661e+07	3.13724e+07	3.71295e+07	7.03422e+07	5.92603e+07	2.49739e+07	3.06497e+07	1.20314	0.0195995	1.02516
Q01105	SET	Protein SET OS=Homo sapiens OX=9606 GN=SET PE=1 SV=3	41	3	290	3.28751e+07	2.80418e+07	8.01054e+07	3.26741e+07	4.16276e+07	2.67879e+07	2.98457e+07	2.94821e+07	2.73486e+07	2.7731e+07	7.8725e+07	7.36188e+07	1.04223e+08	6.22417e+07	9.00626e+07	3.70806e+07	6.0862e+07	7.342e+07	5.0887e+07	3.83939e+07	0.975938	0.00262813	1.00087
P61163	ACTR1A	Alpha-centractin OS=Homo sapiens OX=9606 GN=ACTR1A PE=1 SV=1	41	2	376	3.86432e+07	3.98162e+07	5.84063e+07	4.80277e+07	60522958	2.82296e+07	4.13861e+07	4.63884e+07	3.80227e+07	3.75356e+07	8.70637e+07	6.28974e+07	4.74935e+07	7.10417e+07	1.21276e+08	8.70195e+07	1.1019e+08	6.04003e+07	7.64737e+07	4.23699e+07	0.880144	0.00449322	1.15353
P13693	TPT1	Translationally-controlled tumor protein OS=Homo sapiens OX=9606 GN=TPT1 PE=1 SV=1	41	3	172	1.79414e+07	2.08465e+07	1.8845e+07	1.70722e+07	1.10915e+07	6.9697e+06	1.08587e+07	1.60108e+07	1.23593e+07	1.56128e+07	1.04576e+07	2.55839e+07	2.58744e+07	2.19081e+07	7.83235e+06	2.15752e+07	3.7343e+07	2.67997e+07	3.21317e+07	2.08185e+07	0.657224	0.0387715	0.657543
Q07812	BAX	Apoptosis regulator BAX OS=Homo sapiens OX=9606 GN=BAX PE=1 SV=1	41	5	192	1.63965e+07	1.53887e+07	1.65582e+07	9.06957e+06	5.5111e+06	3.82961e+06	5.66494e+06	1.20155e+07	8.00544e+06	4.093e+06	7.57632e+06	1.16654e+07	1.35695e+07	1.1114e+07	8.39249e+06	1.93543e+07	1.75626e+07	1.56929e+07	2.95324e+07	2.45523e+07	0.630092	0.111926	0.472707
Q92599	SEPTIN8	Septin-8 OS=Homo sapiens OX=9606 GN=SEPTIN8 PE=1 SV=4	41	3	483	0	3.69194e+06	5.84291e+06	4.17651e+06	6.50076e+06	0	2.70227e+06	4.30307e+06	3.15365e+06	3.35383e+06	6.44431e+06	6.10029e+06	1.20353e+07	5.66235e+06	0	0	3.24917e+06	3.80591e+06	8.33191e+06	7.63811e+06	0.588146	0.315702	0.300349
P62333	PSMC6	26S proteasome regulatory subunit 10B OS=Homo sapiens OX=9606 GN=PSMC6 PE=1 SV=1	41	8	389	2.40122e+07	2.06697e+07	2.88975e+07	2.16004e+07	1.12342e+07	1.08602e+07	1.96405e+07	1.78488e+07	1.60561e+07	1.82169e+07	1.3977e+07	2.42022e+07	2.408e+07	2.70126e+07	1.29014e+07	1.38981e+07	1.61469e+07	2.27359e+07	2.71571e+07	2.5261e+07	0.0981582	0.676722	0.12347
O15173	PGRMC2	Membrane-associated progesterone receptor component 2 OS=Homo sapiens OX=9606 GN=PGRMC2 PE=1 SV=1	41	3	223	2.32786e+07	2.76661e+07	2.73619e+07	2.41342e+07	2.28965e+07	2.88489e+07	2.31898e+07	3.13305e+07	2.65707e+07	2.58072e+07	2.63852e+07	2.04801e+07	2.22919e+07	2.02008e+07	2.88879e+07	2.23265e+07	1.63774e+07	1.03391e+07	1.79982e+07	2.51019e+07	-0.342751	0.0255771	-0.70914
P00568	AK1	Adenylate kinase isoenzyme 1 OS=Homo sapiens OX=9606 GN=AK1 PE=1 SV=3	41	7	194	1.66998e+07	2.55245e+07	2.64593e+07	2.60192e+07	2.06292e+07	1.52815e+07	1.85371e+07	3.316e+07	2.38706e+07	2.35926e+07	4.18977e+07	1.64154e+07	1.66836e+07	3.31911e+07	0	4.7538e+06	9.05322e+06	1.96005e+07	1.53668e+07	2.48544e+07	-0.397795	0.30891	-0.316349
P07360	C8G	Complement component C8 gamma chain OS=Homo sapiens OX=9606 GN=C8G PE=1 SV=3	41	6	202	1.61814e+07	7.26638e+06	1.34621e+08	7.95225e+06	1.59102e+07	7.52113e+06	9.14807e+06	1.08684e+07	1.9283e+07	1.04799e+07	9.15238e+06	1.29585e+07	2.24974e+07	2.72184e+07	1.00694e+07	3.07034e+07	1.91196e+06	3.09624e+07	8.86747e+06	1.68203e+07	-0.480282	0.681113	-0.143181
O00764	PDXK	Pyridoxal kinase OS=Homo sapiens OX=9606 GN=PDXK PE=1 SV=1	41	4	312	2.42987e+07	2.43732e+07	3.20486e+07	1.35443e+07	2.36403e+07	1.47246e+07	2.77731e+07	4.32734e+07	3.29538e+07	2.68011e+07	1.42012e+07	1.93892e+07	1.30494e+07	6.80758e+06	10517697	3.1225e+07	7.23654e+06	1.7165e+07	2.43073e+07	2.59293e+07	-0.720366	0.0322267	-0.654473
Q9P0J0	NDUFA13	NADH dehydrogenase [ubiquinone] 1 alpha subcomplex subunit 13 OS=Homo sapiens OX=9606 GN=NDUFA13 PE=1 SV=3	41	5	144	7.03927e+07	6.0352e+07	6.41084e+07	5.76884e+07	9.68792e+07	8.63967e+07	7.07496e+07	7.60669e+07	7.31816e+07	6.38396e+07	5.96434e+06	1.91162e+07	13748334	9.91994e+06	3.35777e+07	2.65432e+07	1.3519e+07	1.37581e+07	3.17548e+07	6.96531e+07	-1.94769	1.2528e-06	-2.5729
O94826	TOMM70	Mitochondrial import receptor subunit TOM70 OS=Homo sapiens OX=9606 GN=TOMM70 PE=1 SV=1	41	7	608	2.93598e+07	2.76008e+07	1.70482e+07	1.60964e+07	1.51772e+07	1.78397e+07	2.5578e+07	2.36124e+07	2.5256e+07	2.72174e+07	0	4.62391e+06	0	0	0	6.28674e+06	2.2337e+06	1.97458e+06	1.72414e+07	2.21916e+07	-2.64425	2.2025e-05	-1.82023
O00217	NDUFS8	NADH dehydrogenase [ubiquinone] iron-sulfur protein 8, mitochondrial OS=Homo sapiens OX=9606 GN=NDUFS8 PE=1 SV=1	41	5	210	3.62509e+07	3.88098e+07	4.70287e+06	1.80286e+07	4.23578e+07	3.16417e+07	2.83677e+07	4.06727e+07	3.53648e+07	3.34337e+07	4.51526e+06	4.02957e+06	5.01461e+06	3.18513e+06	578519	1.76291e+06	1.50007e+06	3.72936e+06	9.31256e+06	3.17418e+07	-3.05081	0.000232849	-2.03389
Q96AB3	ISOC2	Isochorismatase domain-containing protein 2 OS=Homo sapiens OX=9606 GN=ISOC2 PE=1 SV=1	41	4	205	6.55981e+07	6.95025e+07	2.33835e+07	5.99917e+07	5.57182e+07	7.41564e+07	6.03919e+07	4.77043e+07	4.86985e+07	6.41019e+07	4.23827e+06	6.1632e+06	1.05059e+07	4.14397e+06	0	2.39324e+06	9.68271e+06	3.26472e+06	1.53039e+07	4.08266e+07	-3.20141	1.56381e-06	-2.78287
A1L0T0	ILVBL	Acetolactate synthase-like protein OS=Homo sapiens OX=9606 GN=ILVBL PE=1 SV=2	41	8	632	2.07203e+07	1.77762e+07	5.14743e+06	1.49444e+07	9.94819e+06	1.80847e+07	1.79103e+07	1.8198e+07	2.08633e+07	1.55702e+07	0	1.39841e+06	0	0	0	0	0	0	9.21384e+06	1.52783e+07	-3.7547	1.71803e-05	-1.95501
P51580	TPMT	Thiopurine S-methyltransferase OS=Homo sapiens OX=9606 GN=TPMT PE=1 SV=1	41	7	245	2.58317e+07	2.45205e+07	0	2.06752e+07	6.19814e+06	3.38122e+07	2.99659e+07	1.81299e+07	1.80539e+07	1.80229e+07	0	0	0	0	0	0	0	1.18404e+06	1.11478e+07	1.96233e+07	-3.83257	0.00109869	-1.37563
P08575	PTPRC	Receptor-type tyrosine-protein phosphatase C OS=Homo sapiens OX=9606 GN=PTPRC PE=1 SV=3	40	10	1306	2.9227e+06	1.32839e+06	5.22307e+06	3.41361e+06	5.96682e+06	2.66461e+06	2.91444e+06	4.09848e+06	3.30846e+06	4.50225e+06	1.92899e+07	4.20083e+07	5.12699e+07	4.60358e+07	3.80332e+07	9.00907e+07	5.12425e+07	3.32169e+07	1.71183e+07	4.0085e+06	3.56945	0.00215414	1.82921
P26599	PTBP1	Polypyrimidine tract-binding protein 1 OS=Homo sapiens OX=9606 GN=PTBP1 PE=1 SV=1	40	7	531	3.12136e+07	2.13328e+07	5.01623e+07	3.1742e+07	3.01175e+07	2.38264e+07	3.16566e+07	2.54461e+07	2.05901e+07	2.86349e+07	8.49435e+07	7.07104e+07	7.44543e+07	5.12222e+07	6.36469e+07	5.04497e+07	6.30709e+07	4.82292e+07	5.52685e+07	4.36852e+07	1.08321	4.73004e-05	1.67133
P62888	RPL30	60S ribosomal protein L30 OS=Homo sapiens OX=9606 GN=RPL30 PE=1 SV=2	40	3	115	7.73849e+06	7.08832e+06	2.10226e+07	1.78895e+07	2.39265e+07	1.87264e+07	1.58876e+07	1.15213e+07	7.94524e+06	1.15467e+07	1.6431e+07	2.17342e+07	3.94751e+07	2.61298e+07	3.83669e+07	3.90793e+07	4.49868e+07	1.93661e+07	1.81e+07	1.22029e+07	1.03177	0.00969269	0.926918
P62899	RPL31	60S ribosomal protein L31 OS=Homo sapiens OX=9606 GN=RPL31 PE=1 SV=1	40	4	125	1.96733e+07	1.6244e+07	3.45973e+07	3.06262e+07	2.99374e+07	2.78537e+07	2.02123e+07	2.26896e+07	2.0741e+07	1.57036e+07	3.07047e+07	5.04195e+07	2.61777e+07	5.61302e+07	4.89136e+07	4.70405e+07	8.79884e+07	4.22367e+07	3.14734e+07	1.39661e+07	0.973466	0.00555212	0.972033
P62750	RPL23A	60S ribosomal protein L23a OS=Homo sapiens OX=9606 GN=RPL23A PE=1 SV=1	40	5	156	2.15061e+07	1.47911e+07	3.82538e+07	2.22707e+07	1.54721e+07	2.31704e+07	2.38179e+07	2.72822e+07	1.94656e+07	1.92418e+07	4.16417e+07	5.62744e+07	3.86101e+07	3.87203e+07	2.69265e+07	3.99224e+07	5.20481e+07	5.70893e+07	4.53437e+07	2.45367e+07	0.967936	0.000231964	1.38664
Q9Y2B0	CNPY2	Protein canopy homolog 2 OS=Homo sapiens OX=9606 GN=CNPY2 PE=1 SV=1	40	3	182	1.41728e+07	1.61015e+07	1.60815e+07	1.06652e+07	1.88189e+07	1.18384e+07	1.48792e+07	1.59042e+07	1.31805e+07	1.29408e+07	7.81438e+06	1.9807e+07	2.16782e+07	1.00103e+07	1.41457e+07	2.51364e+07	4.88639e+07	1.565e+07	17120207	1.36891e+07	0.469915	0.278771	0.406637
Q13200	PSMD2	26S proteasome non-ATPase regulatory subunit 2 OS=Homo sapiens OX=9606 GN=PSMD2 PE=1 SV=3	40	10	908	4.31794e+07	2.86083e+07	4.69853e+07	2.40576e+07	3.22258e+07	1.67161e+07	3.48207e+07	3.17409e+07	8.54865e+07	3.94885e+07	7.46291e+07	3.3978e+07	5.2479e+07	8.29247e+07	2.09534e+07	3.40161e+07	6.67922e+07	5.3768e+07	4.96363e+07	3.20932e+07	0.443627	0.202148	0.37287
P53618	COPB1	Coatomer subunit beta OS=Homo sapiens OX=9606 GN=COPB1 PE=1 SV=3	40	10	953	1.59216e+07	1.56817e+07	5.97638e+06	1.38051e+07	6.20208e+06	5.20261e+06	7.81427e+06	1.15652e+07	1.67602e+07	1.32714e+07	1.07484e+07	2.20713e+07	9.02817e+06	8.98334e+06	0	1.22676e+07	2.40737e+07	2.12645e+07	1.33401e+07	1.53212e+07	0.270166	0.508132	0.199643
P04732	MT1E	Metallothionein-1E OS=Homo sapiens OX=9606 GN=MT1E PE=1 SV=1	40	1	61	3.46968e+06	0	0	0	0	1.03297e+07	0	0	0	0	0	0	0	0	0	0	0	0	5.25667e+06	3.57359e+06	-1.24038	0.600867	-0.165477
P30049	ATP5F1D	ATP synthase subunit delta, mitochondrial OS=Homo sapiens OX=9606 GN=ATP5F1D PE=1 SV=2	40	3	168	1.46594e+08	1.79386e+08	9.16719e+07	1.24762e+08	296098722	1.72852e+08	115276991	1.58031e+08	1.16805e+08	1.24958e+08	3.99841e+07	3.84604e+07	3.90106e+07	2.91584e+07	5.45466e+07	5.79185e+07	6.65526e+07	4.25878e+07	7.76484e+07	1.07608e+08	-1.62348	0.000471786	-1.48825
Q8NFU3	TSTD1	Thiosulfate:glutathione sulfurtransferase OS=Homo sapiens OX=9606 GN=TSTD1 PE=1 SV=3	40	4	115	1.84839e+07	3.45158e+07	2.85619e+07	3.31348e+07	5.93056e+07	4.87319e+07	2.90607e+07	2.10901e+07	2.47884e+07	2.00656e+07	3.81486e+06	1.31467e+07	2.01371e+07	4.61923e+06	3.97013e+06	1.48823e+07	1.06666e+07	9.84074e+06	8.83298e+06	1.75735e+07	-1.66927	0.00111697	-1.23552
Q9NVS9	PNPO	Pyridoxine-5'-phosphate oxidase OS=Homo sapiens OX=9606 GN=PNPO PE=1 SV=1	40	6	261	5.50962e+07	5.5559e+07	1.16555e+07	3.26691e+07	2.37232e+07	5.29416e+07	4.07893e+07	2.26309e+07	3.02679e+07	5.84235e+07	0	6.24407e+06	2.1927e+06	1.66585e+06	0	2.73233e+06	0	0	2.9382e+07	1.8557e+07	-3.0323	0.000448184	-1.36625
P29972	AQP1	Aquaporin-1 OS=Homo sapiens OX=9606 GN=AQP1 PE=1 SV=3	40	2	269	7.25806e+07	1.0198e+08	2.1842e+07	4.00966e+07	6.8649e+07	6.04933e+07	5.71775e+07	5.6624e+07	5.73658e+07	5.81574e+07	0	2.12196e+06	0	0	0	3.8357e+06	0	0	3.37769e+07	4.82759e+07	-3.75234	3.36072e-05	-1.82724
P19801	AOC1	Amiloride-sensitive amine oxidase [copper-containing] OS=Homo sapiens OX=9606 GN=AOC1 PE=1 SV=4	40	10	751	1.04971e+07	6.91977e+07	3.76293e+06	9.12812e+06	1.93224e+07	3.55761e+07	5.70061e+07	1.94749e+07	1.63118e+06	4.0599e+07	0	1.54258e+07	0	0	0	0	0	0	1.05454e+06	5.83239e+07	-3.86167	0.0186473	-0.925201
P08246	ELANE	Neutrophil elastase OS=Homo sapiens OX=9606 GN=ELANE PE=1 SV=1	39	7	267	3.47676e+06	2.95835e+06	1.39301e+07	1.45785e+07	1.76516e+07	4.33315e+06	6.82269e+06	4.37181e+06	9.84778e+06	2.32384e+07	1.16234e+08	9.3559e+07	418861968	2.0488e+08	2.08477e+08	2289155614	6.73982e+08	7.37807e+07	3.20417e+07	5.52895e+06	5.49607	0.148683	0.654849
P55001	MFAP2	Microfibrillar-associated protein 2 OS=Homo sapiens OX=9606 GN=MFAP2 PE=2 SV=1	39	5	183	8.30074e+06	3.50173e+06	8.51497e+07	3.17565e+07	1.23535e+07	5.9291e+06	1.22285e+07	1.4699e+07	1.18299e+07	1.26482e+07	1.6906e+08	8.44357e+07	1.90822e+07	6.66201e+08	82686810	1.05889e+08	1.0226e+08	9.44285e+07	6.39348e+06	7.01671e+06	2.89744	0.141384	0.604584
Q12907	LMAN2	Vesicular integral-membrane protein VIP36 OS=Homo sapiens OX=9606 GN=LMAN2 PE=1 SV=1	39	8	356	1.18163e+07	7.27943e+06	2.00064e+07	1.44777e+07	2.19995e+06	0	1.0644e+07	7.66914e+06	6.71248e+06	8.34546e+06	4.36738e+07	7.20328e+07	5.81944e+07	4.40108e+07	2.0749e+07	6.55996e+07	7.87678e+07	5.04655e+07	4.46438e+07	2.13935e+07	2.57511	0.000305751	1.9983
Q01469	FABP5	Fatty acid-binding protein 5 OS=Homo sapiens OX=9606 GN=FABP5 PE=1 SV=3	39	6	135	1.89352e+07	6.11219e+06	3.48831e+07	1.89232e+07	7.38754e+07	7.76986e+07	1.70765e+07	1.91407e+07	1.35611e+07	4.22571e+06	1.22307e+07	3.71725e+07	6.54354e+07	2.2477e+07	4.06147e+08	1.45947e+08	9.65383e+07	2.0319e+07	5.73057e+07	9.56322e+06	1.75424	0.163192	0.476271
Q9HDC9	APMAP	Adipocyte plasma membrane-associated protein OS=Homo sapiens OX=9606 GN=APMAP PE=1 SV=2	39	6	416	1.97696e+07	1.82329e+07	2.02008e+07	2.47327e+07	1.97646e+07	1.70272e+07	2.17497e+07	2.07798e+07	2.08179e+07	1.73943e+07	3.37129e+07	4.23734e+07	5.73172e+07	4.467e+07	4.6333e+07	1.67901e+08	6.04457e+07	4.5418e+07	3.38269e+07	1.86056e+07	1.56004	0.0449729	0.940721
O60763	USO1	General vesicular transport factor p115 OS=Homo sapiens OX=9606 GN=USO1 PE=1 SV=2	39	10	962	4.04373e+07	3.48836e+07	7.50914e+07	7.11396e+07	5.65678e+07	2.6165e+07	6.52295e+07	8.20687e+07	4.40101e+07	4.16086e+07	1.55993e+08	7.76453e+07	6.14256e+07	1.06989e+08	1.8099e+08	6.4014e+07	1.00574e+08	2.59673e+08	5.98311e+07	3.08755e+07	1.14221	0.0426483	0.789568
Q09028	RBBP4	Histone-binding protein RBBP4 OS=Homo sapiens OX=9606 GN=RBBP4 PE=1 SV=3	39	5	425	9.10437e+06	9.55794e+06	2.93321e+07	1.33306e+07	1.3012e+07	9.34771e+06	5.36965e+06	1.25761e+07	1.26806e+07	5.43134e+06	3.14291e+07	2.5057e+07	3.73887e+07	2.64277e+07	3.55891e+07	1.39485e+07	1.77399e+07	2.16797e+07	1.37035e+07	1.27483e+07	1.04887	0.0068012	0.868597
P48444	ARCN1	Coatomer subunit delta OS=Homo sapiens OX=9606 GN=ARCN1 PE=1 SV=1	39	8	511	1.42697e+07	8.99301e+06	1.82458e+07	1.65577e+07	8.6779e+06	9.78615e+06	1.14589e+07	1.18805e+07	8.62625e+06	1.14747e+07	1.0734e+07	2.37295e+07	2.33728e+07	1.29465e+07	1.13966e+07	1.48721e+07	2.7167e+07	1.25465e+07	1.96159e+07	1.36614e+07	0.534388	0.0691356	0.595929
O00303	EIF3F	Eukaryotic translation initiation factor 3 subunit F OS=Homo sapiens OX=9606 GN=EIF3F PE=1 SV=1	39	5	357	9.90407e+06	1.11024e+07	1.81205e+07	1.30466e+07	8.40674e+06	4.95352e+06	1.36441e+07	1.43118e+07	8.3441e+06	1.09177e+07	8.69096e+06	1.74273e+07	1.9733e+07	1.892e+07	7.21981e+06	1.11931e+07	1.70271e+07	1.28619e+07	2.15335e+07	1.62697e+07	0.407607	0.136126	0.441122
Q96AC1	FERMT2	Fermitin family homolog 2 OS=Homo sapiens OX=9606 GN=FERMT2 PE=1 SV=1	39	8	680	1.33446e+07	2.22145e+07	1.6692e+07	2.02743e+07	1.49031e+07	1.55662e+07	2.04415e+07	2.86765e+07	2.33751e+07	1.95097e+07	6.50168e+07	3.26398e+07	1.85923e+07	3.30119e+07	1.3674e+07	7.79638e+06	1.6101e+06	2.93594e+07	1.77801e+07	2.03655e+07	0.322643	0.541319	0.221984
Q6NUK1	SLC25A24	Calcium-binding mitochondrial carrier protein SCaMC-1 OS=Homo sapiens OX=9606 GN=SLC25A24 PE=1 SV=2	39	4	477	1.42144e+07	1.33767e+07	1.18344e+07	1.24544e+07	1.32411e+07	1.74754e+07	1.24225e+07	9.78529e+06	1.36265e+07	8.80069e+06	5.64126e+06	1.09102e+07	2.28561e+07	7.25209e+06	1.60758e+07	3.25214e+07	2.06332e+07	8.2922e+06	9.83114e+06	1.11068e+07	0.226924	0.571668	0.202898
Q02818	NUCB1	Nucleobindin-1 OS=Homo sapiens OX=9606 GN=NUCB1 PE=1 SV=4	39	6	461	1.11762e+07	1.47381e+07	1.39703e+07	1.59216e+07	2.07223e+07	1.15942e+07	1.2097e+07	1.30426e+07	1.15951e+07	1.30046e+07	2.43532e+07	1.47558e+07	1.22668e+07	1.1968e+07	1.1245e+07	1.21038e+07	2.30051e+07	1.48416e+07	1.77885e+07	1.29609e+07	0.197997	0.354108	0.276024
O00748	CES2	Cocaine esterase OS=Homo sapiens OX=9606 GN=CES2 PE=1 SV=1	39	9	559	7.48545e+07	5.28772e+07	4.1587e+07	3.49452e+07	4.48054e+07	1.24021e+08	4.69717e+07	5.55328e+07	4.58914e+07	7.02861e+07	4.10483e+07	3.80164e+07	5.88106e+07	5.57453e+07	8.84234e+07	6.39495e+07	6.68871e+07	3.12349e+07	2.80643e+07	2.74263e+07	-0.173703	0.605863	-0.155842
P54136	RARS1	Arginine--tRNA ligase, cytoplasmic OS=Homo sapiens OX=9606 GN=RARS1 PE=1 SV=2	39	9	660	2.50381e+07	1.94353e+07	2.40746e+07	1.86148e+07	1.66263e+07	3.27157e+07	2.05261e+07	1.84693e+07	2.0947e+07	1.61866e+07	2.35951e+07	2.05835e+07	1.52932e+07	1.1439e+07	9.15054e+06	2.13084e+07	2.11167e+07	1.97282e+07	2.70651e+07	1.98868e+07	-0.17696	0.406074	-0.242387
Q13492	PICALM	Phosphatidylinositol-binding clathrin assembly protein OS=Homo sapiens OX=9606 GN=PICALM PE=1 SV=2	39	7	652	1.57426e+07	1.53629e+07	2.34242e+07	2.20174e+07	1.5574e+07	1.92091e+07	2.02682e+07	1.28768e+07	1.40866e+07	2.11657e+07	1.65704e+07	1.29063e+07	8.0102e+06	2.58097e+06	4.24936e+07	1.00099e+07	1.38164e+07	7.15004e+06	7.21704e+06	1.56327e+07	-0.421725	0.328751	-0.314123
Q9NPH2	ISYNA1	Inositol-3-phosphate synthase 1 OS=Homo sapiens OX=9606 GN=ISYNA1 PE=1 SV=1	39	8	558	1.4812e+07	9.74963e+06	5.6345e+07	3.33413e+07	3.4424e+07	1.10855e+07	9.82897e+06	3.64512e+07	2.57116e+07	1.84127e+07	4.58662e+07	3.72281e+07	4.16325e+06	2.8727e+07	1.089e+07	2.42569e+06	0	8.49498e+06	5.52336e+06	2.1605e+07	-0.651634	0.304328	-0.299915
Q9BYF1	ACE2	Angiotensin-converting enzyme 2 OS=Homo sapiens OX=9606 GN=ACE2 PE=1 SV=2	39	9	805	46339107	5.32565e+07	2.48716e+07	3.18633e+07	5.41769e+07	3.82204e+07	3.48833e+07	3.28991e+07	5.11232e+07	3.25289e+07	2.28553e+07	1.97729e+07	1.21317e+07	1.17319e+07	6.31736e+07	6.74087e+06	1.63446e+07	1.38279e+07	1.90659e+07	4.45782e+07	-0.956038	0.016291	-0.757803
P23588	EIF4B	Eukaryotic translation initiation factor 4B OS=Homo sapiens OX=9606 GN=EIF4B PE=1 SV=2	39	5	611	1.16275e+08	1.43849e+08	66723377	7.86387e+07	7.93199e+07	1.77425e+08	108058044	9.80728e+07	7.96367e+07	8.31126e+07	2.11726e+07	3.24339e+07	1.99855e+07	2.8354e+07	4.04682e+07	2.49037e+07	4.39245e+07	2.52108e+07	4.64802e+07	9.97579e+07	-1.71366	0.000472915	-1.69385
O75264	SMIM24	Small integral membrane protein 24 OS=Homo sapiens OX=9606 GN=SMIM24 PE=2 SV=2	39	4	130	3.24184e+07	7.12772e+07	0	1.42348e+07	1.89226e+07	2.51636e+07	2.92271e+07	1.38838e+07	3.34973e+07	3.24701e+07	0	0	0	0	4.7144e+07	0	2.70308e+06	0	0	2.53726e+07	-2.29121	0.0316859	-0.661264
Q709F0	ACAD11	Acyl-CoA dehydrogenase family member 11 OS=Homo sapiens OX=9606 GN=ACAD11 PE=1 SV=3	39	8	780	2.99201e+07	3.35802e+07	9.87852e+06	2.67494e+07	1.62928e+07	5.00272e+07	2.96128e+07	2.33031e+07	2.37226e+07	3.74339e+07	0	0	0	0	0	0	3.26356e+06	1.46062e+06	1.43218e+07	2.32289e+07	-3.72854	7.75507e-05	-1.72672
P61803	DAD1	Dolichyl-diphosphooligosaccharide--protein glycosyltransferase subunit DAD1 OS=Homo sapiens OX=9606 GN=DAD1 PE=1 SV=3	38	2	113	9.30096e+06	7.35879e+06	1.96884e+07	1.3211e+07	1.31325e+07	1.13818e+07	8.92989e+06	1.45788e+07	1.03223e+07	6.40512e+06	1.66431e+07	2.375e+07	1.71785e+07	1.39019e+07	5.35046e+07	4.37615e+07	4.19194e+07	1.75945e+07	1.005e+07	1.10453e+07	1.21186	0.0413733	0.813715
P84098	RPL19	60S ribosomal protein L19 OS=Homo sapiens OX=9606 GN=RPL19 PE=1 SV=1	38	2	196	1.06408e+07	9.66538e+06	3.03859e+07	1.88893e+07	1.85198e+07	1.86424e+07	1.47305e+07	1.30869e+07	1.35524e+07	1.20266e+07	2.99422e+07	2.56137e+07	3.02542e+07	2.55928e+07	3.07749e+07	2.88904e+07	4.12157e+07	2.68438e+07	2.36017e+07	12751894	0.866248	0.000550034	1.24495
[truncated: 1,442 more rows]
