# Supplementary material for: Integrated kidney and urine proteomics define encrypted antimicrobial peptides as effectors of host defence in human pyelonephritis
Source: bioRxiv preprint, doi:10.64898/2026.04.10.717476, version 1 (2026-04-14)
Supplement: Supplementary Table 4 - LC-MSMS-based Urine Proteomics of Pyelonephritis [file 717476_file05.xlsx]

## Sheet: Supp Tab 4
Supplementary Table 4 – LC-MS/MS-based urine proteomics of pyelonephritis.
Abbreviations: C-control; PN-pyelonephritis; FC-fold change; pV.fdrBH-Benjamini-Hochberg corrected p-value
GENENAME	Found in gene set "REACTOME-NEUTROPHIL DEGRANULATION"?	Found in gene set "REACTOME-ANTOMICROBIAL PEPTIDES"?	Control1	Control2	Control3	Control5	Control6	Control7	Control10	PN1	PN4	PN5	PN6	PN7	PN8	PN9	PN10	PN11	PN12	PN13	PN14	PN17	PN18	PN19	PN20	PN21	PN22	PN23	PN24	PN25	PN26	PN27	PN28	PN29	PN30	PN3	Log2FC_PN.Control	pV.fdrBH_PN.Control
IGKV3-7	no	no	-0.233495	-0.791262	-0.312896	-0.219818	-0.416006	-0.748973	-2.65245	2.95421	2.86615	1.7586	1.5786	0.90025	-0.291011	1.63184	1.76806	1.65466	0.28625	1.22911	2.80843	1.5661	0.199015	1.3701	1.65223	0.780824	1.45816	1.45504	0.616586	3.02806	2.1739	2.36068	3.10833	1.41637	2.4216	1.13823	2.24524	0.000903465
IGLV4-69	no	no	-3.47468	-3.64874	-3.31929	-3.79957	-3.50496	-3.59574	-3.51385	-4.16476	-1.04586	-3.02388	-3.19169	-1.6874	-3.4404	-1.71279	-2.67284	-1.60666	-4.30716	-2.49461	-0.227464	-2.16653	-3.81639	-2.24001	-2.10517	-3.10621	-0.789005	-1.19061	-4.58837	-1.03756	-4.07312	-2.57139	-1.99476	-1.2395	0.14074	-3.16728	1.54577	1.87863e-05
IGLV5-48	no	no	0.429705	-0.753191	-0.310424	-0.0921725	0.588549	-0.0317439	0.149984	-1.3193	3.58612	3.07975	2.99692	3.52899	-0.570757	3.06309	3.29576	4.67947	-0.338718	0.173808	1.28706	2.17746	-2.03969	2.80509	3.32185	0.695177	4.19886	2.16476	1.25914	1.63543	1.42869	-0.355087	2.5329	3.6525	2.89998	3.16243	1.78366	0.000166226
IGLV7-46	no	no	0.231975	0.264715	0.0696353	-0.232464	0.376256	0.186675	0.25974	1.2272	2.92502	2.31465	0.878351	3.1376	-0.924061	1.91658	3.59534	2.80676	-2.34212	1.84242	3.23031	4.28052	0.486825	1.85113	3.43057	1.70232	3.41312	2.67738	2.70738	3.4694	3.10197	0.0624474	2.3981	4.07964	3.73855	2.43768	2.02929	9.42177e-06
IGLV5-37	no	no	-1.75479	-1.29161	-1.3622	-1.6136	-1.32704	-1.73502	-1.647	-0.00614416	0.958336	-0.466491	0.633882	0.548157	-2.17232	0.368137	0.423266	1.11657	-2.88082	1.13609	0.990126	1.44062	-2.40536	-2.63995	-0.722042	-0.116539	0.398488	2.11476	-2.20514	2.12105	1.26163	1.3391	2.30338	1.88753	-3.2041	0.661344	2.15562	6.44999e-06
IGLV2-33	no	no	-0.547433	-0.993984	-0.781345	-0.716313	-0.589625	-1.04624	-0.765442	1.43379	1.54822	0.793364	2.6836	2.1769	-0.180901	-0.0129617	1.704	1.24229	-2.73721	-1.66324	0.725503	0.515171	-0.397876	1.93255	-0.422934	1.99792	1.5702	0.472106	-0.161326	1.54285	2.29991	3.46887	2.41236	1.5845	0.553964	1.09174	1.65607	3.95363e-05
IGLV2-18	no	no	0.0911372	-0.195478	0.464286	-2.35967	-0.40794	-0.94011	-0.580945	2.16888	4.64181	3.47464	2.08456	4.61872	0.58207	4.659	3.75585	3.3354	-1.86952	1.15684	2.7135	4.69036	-0.268249	2.5106	2.84237	1.7627	3.22634	2.82306	3.2409	4.38577	2.98967	0.176021	4.3677	3.60603	1.25273	1.78197	3.09332	8.50173e-05
IGLV3-16	no	no	0.457124	0.305473	0.791928	0.513551	0.47049	0.136895	0.344431	0.917578	2.44977	2.57656	3.7232	2.00781	0.465334	1.69004	1.84131	3.11065	0.139408	1.5233	1.33612	1.3589	-2.29654	2.11869	2.55079	1.77762	2.18588	2.12933	1.09915	1.8086	2.21441	2.81487	1.14833	2.5914	2.21307	2.29021	1.39764	1.95215e-05
IGLV3-12	no	no	0.934373	0.16708	0.264547	1.5584	-2.96308	-1.54264	-0.107568	2.04053	2.44416	3.05089	2.61651	2.40847	1.91559	3.12632	1.2301	4.63742	0.820586	-0.552866	2.11271	3.42192	-0.951032	3.22034	2.24504	4.50115	3.72961	5.06058	3.60798	3.50911	3.30006	4.18421	3.45792	3.75277	4.15231	3.78536	2.80979	0.00249328
IGLV3-10	no	no	-0.069479	-1.00806	0.376604	-0.154893	-1.04671	-3.1529	0.713221	1.88043	3.89519	3.56533	5.33755	1.4118	1.46114	2.35354	3.37734	-0.899471	1.66665	2.04573	2.41648	2.90742	-0.892633	3.59013	4.09313	0.360245	3.3294	3.8051	1.90895	3.30349	4.03198	4.25676	1.9193	1.40528	3.4669	3.45216	2.97056	0.000782767
IGLV3-9	no	no	0.460178	0.587298	1.02861	-4.94873	1.16798	-1.43714	0.688195	3.68127	4.40879	4.58781	5.16382	4.39142	2.77188	3.57415	4.2585	5.00706	1.86236	2.79731	3.41338	3.47768	-0.314672	4.43955	4.27961	4.58254	4.92384	4.56966	4.10035	3.64585	4.53206	5.11505	3.72045	5.4647	4.60995	4.67392	4.38101	0.00311013
IGKV2-28;IGKV2D-28	no	no	-1.85439	-2.87498	-3.88053	-2.75019	-3.46088	0.260686	-4.12923	3.51473	5.79004	4.55907	3.41833	5.26101	3.72474	4.93782	4.33016	5.25509	2.54032	4.6094	5.64596	4.11444	2.89596	4.56801	3.83553	3.75281	4.29077	5.16588	4.85696	5.44604	4.81721	4.90658	5.87155	4.89442	5.3964	5.04697	7.02025	0.000101108
IGHV3-64	no	no	-1.24237	-2.05765	-1.38257	-1.59262	-1.64526	-0.948106	-2.12313	-0.751339	1.17203	1.75469	2.34655	2.01943	-1.13401	1.62184	2.27297	3.43009	-1.79941	-0.773813	-0.631997	-0.911882	-2.38327	1.44115	1.77678	-1.06631	2.76952	0.765283	-0.645825	-1.84935	1.51911	2.9241	0.758827	0.448544	0.0797041	2.10301	2.08232	1.34816e-05
IGHV4-4	no	no	-4.38211	-4.23616	-3.95114	-4.91159	-3.67922	-3.50051	-4.71016	-4.4206	-2.20334	0.88589	0.118397	-0.427726	-2.6394	-3.35852	1.12195	3.33311	-5.33093	-4.29186	-4.7357	-3.59136	-2.68284	-0.523006	-0.435847	-1.71642	0.613121	-5.23051	-3.462	-5.66428	-3.84188	2.30542	-1.69252	-3.56808	-1.26873	0.0101538	2.49116	0.000708737
IGKV2D-24;IGKV2-24	no	no	1.07366	0.312861	0.980348	0.0148299	-0.293783	1.18072	-4.39724	2.13045	3.35461	4.01279	3.23827	5.32701	1.18978	3.97451	4.84094	4.36386	0.397436	1.15933	3.44703	2.60885	-0.545247	4.96313	4.214	2.25849	4.39923	3.70516	2.08912	3.82795	6.32968	4.16836	4.58375	4.39403	4.48207	3.36843	3.33861	0.00905392
IGKV2D-29	no	no	5.02201	3.25661	3.72135	3.76094	4.40326	1.61816	4.29241	6.68419	7.36478	7.3574	5.55404	6.78153	5.36588	7.14449	7.55952	6.69816	2.01027	5.05607	8.12903	7.0463	2.23155	7.251	7.36446	6.27873	6.8918	6.55343	7.47559	7.78849	5.81735	9.00897	7.59786	6.39493	7.38287	6.23074	3.098	2.44579e-05
IGKV1-27	no	no	0.132869	0.133644	0.690217	0.476393	0.432566	-0.124405	0.453763	0.835263	3.35183	3.19267	2.56421	4.1984	0.881546	2.95444	2.68538	3.24257	-1.65997	-0.878173	2.24534	1.90478	0.514635	2.73586	1.67734	2.34666	2.56469	2.14757	0.521846	2.27729	1.60641	2.30947	3.70264	3.07203	3.33483	3.02864	1.50253	7.3155e-05
IGKV2D-30	no	no	-2.64007	-3.14452	-2.59483	-2.7124	-2.40106	-2.08815	-2.71681	-2.50418	-2.97086	-3.0697	0.651614	-1.76196	-2.71726	-0.84064	-1.9506	-2.78118	-2.74389	-1.63725	-3.28009	-2.46339	-2.86022	-1.52845	-0.411621	-2.53216	-0.0781816	-1.59301	-2.01038	-1.65988	0.291274	1.22773	-2.72953	-1.63708	-1.53961	-3.13975	1.04747	0.00103439
IGKV1-37;IGKV1D-37	no	no	-0.454194	-0.526192	-0.220458	-0.144829	-0.0361817	-0.839227	-0.370267	1.56288	1.59439	1.94436	0.501141	1.68107	0.229769	1.25486	1.52081	3.43931	-1.65981	1.83068	1.6884	0.126121	0.273146	2.32843	-0.138448	1.0358	1.80267	1.06987	1.46736	1.85654	2.63743	2.44324	3.06408	0.158388	-0.702894	1.35246	1.52851	1.17172e-05
IGLV5-45	no	no	-0.981236	-0.296454	0.105759	-0.808344	-0.487152	-1.12858	-0.542577	2.53537	1.83778	2.6456	2.97998	2.52424	-1.82081	2.91307	3.05099	4.2839	-1.76415	-0.425982	0.876527	1.98409	-1.05308	3.42962	3.22346	-0.499284	3.97881	0.283986	1.21854	0.474112	4.648	3.47107	-0.213266	3.72386	1.56517	1.91515	2.05086	0.000645905
IGKV3D-15	no	no	-3.51601	-2.80689	-1.1431	-0.574401	-3.81971	1.00338	-2.22531	5.07999	-0.576029	-0.103085	-0.331258	-0.0425692	4.5971	1.99121	-0.659344	6.25692	3.00866	3.17829	5.64305	5.64387	4.25572	0.723838	-0.635574	5.18799	4.7512	4.63013	5.62749	5.71612	5.98573	0.791907	1.55651	1.40808	-0.503148	1.49178	4.38176	0.000476613
IGKV1D-8	no	no	-1.32014	-2.10834	-2.03504	-1.27294	-2.43774	-1.65425	-1.96551	-1.92887	1.03828	0.3486	-1.17683	-0.635162	-1.53102	-1.42406	0.398072	0.0713533	-3.07481	-1.53063	0.91785	-1.51473	-1.80587	0.156888	-1.18504	-1.77601	0.427842	0.327266	-2.4854	0.807086	0.397279	1.39875	1.07742	0.605005	0.599251	0.415993	1.35892	0.000271055
IGKV2-40;IGKV2D-40	no	no	-1.13194	-0.755949	-0.454404	-0.577746	-0.164469	0.16651	-0.647973	-0.36362	0.504148	1.71824	0.422004	1.47662	0.711652	0.173256	1.16869	2.37998	-2.34704	0.365233	3.13825	1.06411	-0.619939	1.34075	2.22901	0.653969	2.61104	1.58881	0.318539	1.53519	1.38082	2.9892	2.78038	1.06206	2.1041	0.964328	1.68803	3.05098e-05
IGLV5-52	no	no	-4.63112	-5.61928	-4.98982	-4.85223	-4.86936	-4.86052	-5.23824	-5.40863	-1.59588	-3.76323	-3.85849	-5.48812	-5.11243	-5.09044	-5.04813	-4.9253	-5.08463	-5.41819	-2.23044	-4.82606	-5.21228	-5.17337	-3.87137	-5.83094	-1.41966	-5.44482	-5.37605	-6.11884	-4.23345	-3.14436	-3.95783	-1.52974	-5.03398	-3.02725	0.737977	0.0224943
IGHV1-45	no	no	-0.331298	-0.212714	-0.622815	-0.80398	-1.64556	-0.529815	-0.400099	0.0746047	0.215011	1.88224	1.82715	2.52703	-0.197308	0.924571	2.15377	3.19074	-1.06126	-0.288678	-0.0206326	0.785828	0.0206008	2.20135	1.69896	0.973376	2.1232	1.54798	1.02268	-0.921142	2.80946	2.29087	0.436726	0.997849	1.32566	2.14543	1.53897	1.22502e-05
IGHV3-49	no	no	2.70853	2.06487	0.617552	1.41991	1.71018	1.28711	1.79836	3.23469	3.91253	4.92852	4.51444	4.83834	3.28193	5.05513	4.80667	6.44573	0.346913	0.801044	2.42299	3.61199	0.372936	4.91063	5.43345	2.91859	5.40272	3.99437	2.9824	1.74989	5.19951	5.71418	4.40178	5.04704	3.271	5.07076	2.17707	7.1021e-06
IGKV6D-21	no	no	-2.00953	-1.28052	-1.98418	-2.09868	-1.16044	-1.37091	-1.90208	-0.538476	0.0409905	-0.060858	0.85463	0.163475	-2.7409	0.449807	0.367108	0.851909	-4.00895	-0.731827	1.1548	0.452993	-1.56181	-0.577881	0.848939	-1.30746	0.634751	0.738901	-0.461289	-1.70455	0.536227	-0.0881855	0.452563	1.0848	-0.301922	0.203075	1.66049	1.26769e-05
IGLV1-36	no	no	-0.772009	-0.793195	-0.785154	-0.741272	-0.668374	-0.784333	-0.379508	0.688122	0.980933	3.28533	1.13504	3.46088	-1.29097	4.15768	1.02193	3.1667	-1.25844	-0.633789	3.04495	0.34549	-0.691507	2.32541	1.63624	-2.37722	2.72275	2.20567	-0.333437	1.10324	4.08793	4.54023	3.27741	1.38435	3.49023	2.0129	2.37416	0.00011153
IGHV6-1	no	no	-3.23745	-2.63186	-1.86319	-2.34479	-2.69199	-2.02685	-3.32086	-1.99312	-1.95799	0.802203	0.311157	0.690408	-3.34835	-0.37516	1.50536	1.61762	-3.10124	-2.21735	-1.45792	-2.59965	-2.49473	-0.893372	0.965826	-0.733831	1.8635	0.0314165	-3.07082	-3.29648	1.16978	1.17863	-1.50146	0.551421	-0.595136	-0.439745	2.19702	1.78162e-05
IGHV3-15	no	no	1.01898	0.639637	0.338772	0.0178667	0.470559	0.576329	0.491551	1.31339	2.03687	1.81185	1.62108	2.7274	1.2887	1.9521	2.73255	2.77264	-1.01985	0.259193	1.13991	1.99923	-1.96345	1.59669	3.04514	0.668187	3.30996	2.1534	1.77772	0.886364	2.9061	2.85561	2.25785	2.75283	1.58505	2.32613	2.00448	3.06254e-06
IGHV3-21	no	no	-4.34847	-4.66666	-4.914	-4.46043	-5.11515	-5.07422	-4.85895	-2.9456	-5.88177	-5.36903	-2.39105	-4.06307	-5.3589	-3.74726	-4.71507	-3.22829	-5.06925	-4.96423	-2.99918	-4.55232	-4.50706	-4.42114	-4.74887	-4.95338	-4.10495	-3.64174	-4.48061	-3.51653	-4.7109	-3.55226	-4.66001	-3.23682	-2.40559	-3.20545	0.524216	0.0126969
IGHV2-26	no	no	-5.44511	-4.23362	-5.05237	-5.18406	-4.84185	-4.36988	-5.60577	-5.25087	-4.21842	-2.45254	-2.26257	-1.60911	-4.88058	-3.5058	-1.0558	-0.947917	-5.23333	-4.32608	-5.43574	-4.26468	-4.55148	-2.9753	-3.16081	-3.02732	-2.15673	-2.01721	-4.7014	-5.32889	-1.96328	-0.0300718	-2.4243	-2.47775	-1.9866	-2.5295	1.46188	0.000420495
IGHV3-73	no	no	0.644919	0.914942	-0.164341	0.599117	0.0311101	1.15178	0.785779	2.29076	2.57381	2.44229	3.00428	3.56898	0.536893	3.0497	3.80589	4.12116	0.396773	0.189021	1.19	1.15174	-0.714692	3.15388	3.66058	1.45414	3.34685	2.38267	2.07006	1.02206	3.48393	3.06597	2.03365	3.55047	2.52574	2.7218	1.44743	0.000104514
IGHV3-74	no	no	-2.71818	-2.62874	-2.58116	-2.75922	-2.78815	-2.95396	-1.86384	-2.7665	-1.15175	-1.49933	0.577173	0.204985	-4.31987	-0.786491	-1.59132	-0.900162	-1.30239	-3.22372	-2.79398	-0.84132	-2.87987	-0.663018	-0.0696221	-2.82643	-0.225519	-1.54454	-2.89834	-2.72274	-0.562298	1.05159	-2.77922	-0.40101	-1.22576	0.333368	1.63517	2.24908e-05
IGHV3-43	no	no	1.36746	1.25383	0.924333	1.60653	1.05325	1.05021	1.32572	2.00772	3.04471	4.25996	5.0473	4.14856	1.92759	3.3143	4.9465	3.09185	0.787804	1.50904	2.42885	1.91443	0.833256	3.88442	4.7393	0.782663	5.06592	4.69216	3.32626	1.54858	4.71091	5.35571	3.18504	4.93451	5.09838	3.49045	1.95518	8.99116e-05
IGLV9-49	no	no	-1.18978	-1.12349	-1.59008	-1.04038	-0.573822	-0.602796	-1.65636	0.928911	0.710887	1.67882	0.256888	2.04395	0.315337	1.8438	1.30642	3.67503	-0.832617	0.363439	0.0690977	1.2301	-2.50333	0.840894	1.7602	0.366777	3.33126	-1.16825	4.16951	-0.0190985	1.80841	0.941977	1.22397	0.4199	1.32799	-0.814382	1.83018	1.64138e-05
IGHV3-72	no	no	2.34383	1.14305	2.8511	-1.22892	2.43491	1.16973	1.78358	4.06621	4.59594	4.97218	4.30518	5.42803	2.6944	4.41278	6.4007	5.89928	1.77127	4.00287	2.94058	3.57451	0.989821	5.8095	5.83892	2.9	6.72462	4.75882	4.42661	2.56141	5.78597	5.63974	4.07554	4.88788	5.11373	5.56607	2.71629	0.00252852
IGKV1D-43	no	no	-3.66206	-2.81958	-3.51235	-2.46037	-2.63912	-2.28798	-2.5656	-3.42128	-0.419412	1.26832	0.364545	0.302705	-1.94264	-2.62406	-2.88272	-0.317217	-4.32247	-2.38118	0.596149	-0.481165	-2.54137	1.92484	-2.07988	0.0929482	-0.257164	1.80792	-1.49968	-0.308841	-2.63462	-0.661134	1.41935	-2.934	0.659042	1.56223	2.16523	2.35958e-05
IGKV1D-13;IGKV1-13	no	no	-0.56593	-1.14177	-1.53694	-1.75855	-1.04973	-0.666337	-0.313232	0.61679	0.386617	0.294221	1.78268	-0.734769	2.55779	0.823482	0.479001	-0.262278	0.164216	-1.18517	1.58046	3.24807	-1.0986	1.93828	-0.642132	0.960268	0.157408	0.763312	2.82037	6.49927	0.307912	1.28241	2.35552	0.378187	-0.387591	2.50617	2.30489	2.8537e-05
IGHV1-69D	no	no	-2.52525	-2.29241	-2.57938	-2.57992	-2.35143	-2.64747	-2.67447	-2.73569	-2.94911	-2.80566	-2.59032	-1.65537	-2.68046	-2.45121	-1.69123	-1.5286	-2.6483	-2.41357	-2.97175	-2.3281	-2.79244	-2.72001	-2.70682	-2.48263	-2.78466	-1.8199	-2.54871	-2.644	-1.65712	-0.551251	-2.55084	0.111854	-2.263	-2.32329	0.383396	0.0789419
IGKV6-21	no	no	-0.947071	-0.975203	-1.16402	-0.416219	-2.38932	-0.834307	-1.19169	-1.45932	1.77396	1.14276	0.149981	1.56015	-1.56196	2.1917	2.39014	1.87635	-0.576766	0.261988	1.1214	0.805983	-2.56663	1.20288	1.78383	0.706533	2.64967	1.91675	1.181	0.549805	3.94937	2.53394	2.05033	1.70111	0.886491	2.98232	1.60594	3.89134e-05
IGKV3D-20	no	no	0.16121	0.962303	1.71236	2.40742	-0.264728	3.69057	-0.899317	7.45167	8.67688	1.30133	0.0773387	7.21234	7.24872	8.02187	6.71098	0.976567	4.57099	6.30259	8.37379	7.33592	6.48936	2.73132	6.89434	6.83625	7.21956	7.34546	7.94586	8.29434	7.39145	7.69711	8.50374	7.56542	5.54122	7.66828	5.27465	5.26601e-05
IGHV1-3	no	no	-1.71634	-1.17277	-1.53369	-1.54079	-1.8672	-1.61596	-1.21841	-0.860062	-0.714031	1.27864	1.48095	0.978928	-1.60594	0.355137	2.70521	2.62023	-1.268	-0.514244	0.228261	-0.623218	-2.11252	1.10858	0.531948	-0.0581498	0.721648	-1.67375	0.00563825	-1.5982	-1.98076	2.08733	0.59479	-0.906769	1.07371	1.71132	1.64025	1.64138e-05
IGHV1-18	no	no	-1.80501	-1.75168	-1.68855	-1.74545	-1.34557	-1.63674	-0.808529	-0.2692	-0.150638	1.88621	1.40477	1.5462	-0.576872	0.0484084	2.15516	3.56717	-3.32182	-3.99812	-0.120883	-1.87798	-1.3572	1.24176	1.38185	-0.323634	1.42286	1.40532	-1.10774	-1.59797	2.23502	2.50438	0.407042	0.860044	0.963308	1.37476	1.8688	0.000186409
IGHV3-20	no	no	-4.76961	-4.95378	-4.65664	-4.66796	-5.26557	-5.36515	-5.36338	-3.94601	-4.52627	-3.81913	-5.06078	-2.61292	-4.45242	-3.35006	-4.13307	-0.974392	-4.45683	-4.85002	-5.54614	-3.85397	-5.34174	-3.25386	-3.59109	-3.62077	-2.89765	-4.34692	-3.12197	-4.7036	-3.7311	-2.41074	-4.68712	-1.80744	-5.26944	-4.97866	0.937279	0.0026453
IGHV1-24	no	no	-2.68566	-2.22347	-2.61876	-2.43108	-2.4374	-2.34259	-1.86693	-3.5408	-1.77445	-0.0642096	1.13277	0.577864	-3.12307	-1.11646	0.162094	1.01568	-3.16334	-2.67592	-1.3292	-3.27965	-2.42959	0.452876	-0.472816	-2.73744	0.997352	0.319668	-3.2314	-1.85644	0.283	0.261859	-1.19255	-0.488033	1.04907	1.44816	1.40985	0.00155596
IGHV4-28	no	no	-1.51687	-1.91062	-2.10702	-2.31369	-2.91467	-1.86915	-1.78406	-1.38657	-0.395831	1.58086	1.19929	1.80251	-0.658387	1.31519	1.63563	1.8669	-3.54886	-1.00664	-1.50333	-1.7919	-2.1318	1.08559	1.38747	-1.45896	1.98414	0.852674	-0.16476	-2.29043	2.03437	2.93295	0.424929	0.0470039	0.287958	1.22292	1.8168	0.000290003
IGHV3-35	no	no	1.10374	1.79465	1.52767	1.49478	1.3577	1.89867	-2.86301	3.22077	3.89153	4.556	4.56707	4.94051	3.74283	3.72105	5.31837	5.66605	1.53677	3.52902	4.17072	4.87125	1.21936	4.5035	4.2385	3.64094	5.86778	3.92132	4.7712	2.68344	5.20964	5.47876	5.07332	4.76362	4.1053	4.7872	3.1855	0.00462144
IGHV3-38	no	no	-1.16541	-0.827202	-1.00077	0.253846	0.0325363	-2.43062	-0.335063	2.23169	1.93299	1.7651	2.40409	2.56431	0.747041	2.08411	1.7	5.13144	-0.615777	0.807887	0.923695	4.12462	-0.50974	4.22026	3.39701	1.57976	3.59506	2.99564	2.70202	-0.280676	4.94889	4.23867	2.21852	3.06009	1.56702	3.65658	2.6251	0.000766054
IGHV5-51	no	no	1.67147	2.10391	2.25817	2.04183	-0.119045	-0.601538	0.12038	3.68043	4.70635	5.62902	5.55735	6.22308	4.04539	4.71273	6.19154	7.11857	2.64813	3.33788	4.77015	4.25715	1.70865	5.62731	5.61061	3.92435	5.85307	5.26184	3.83698	3.37481	6.06122	6.86804	5.589	5.14069	5.80823	6.04302	3.92024	8.42844e-05
IGHV1-58	no	no	-3.00732	-3.39793	-3.08423	-3.12897	-2.58819	-3.22559	-3.6248	-2.98063	-0.753649	-1.43602	-2.14519	-0.705596	-1.12869	-2.55408	0.243248	-1.16682	-3.30452	-3.54205	-3.5318	-3.70939	-2.98098	-1.55728	-1.1427	-2.97045	-1.31387	-1.54662	-4.47909	-0.99557	-1.57655	1.44187	-2.14263	-2.17697	-1.86839	-2.21047	1.43421	0.000162745
IGKV3D-7	no	no	-0.409758	-1.00388	-0.913995	-0.494384	-1.72567	-1.01838	-0.610436	4.51802	0.379245	4.29728	-0.586268	-0.869226	-1.27835	-0.351998	-0.295606	4.34449	-0.324128	3.46721	6.48122	-0.128321	-0.953058	3.98102	-0.868573	-0.756289	0.0768981	-0.791644	4.76195	1.18281	4.91207	1.57657	5.65475	-0.165773	4.87597	0.839638	2.59888	0.000211602
IGKV1-8	no	no	-0.227895	-0.518287	-0.659758	-0.262045	-0.297699	-2.46391	-0.0990856	0.323216	2.94566	2.20017	2.66483	2.77549	1.32218	1.45342	3.32259	4.30633	-0.264727	-0.350288	2.18891	1.47522	0.657589	1.8287	1.69324	1.24726	2.70376	2.7219	-0.20048	1.73392	2.52821	3.57357	3.29463	2.5481	2.70081	2.55381	2.56202	0.00011369
IGKV1-12;IGKV1D-12	no	no	0.691615	-0.939097	0.38361	-2.82687	-3.81358	-0.471819	-2.30317	2.10093	4.0555	4.153	2.24388	5.08508	2.10947	3.16208	4.53094	4.94333	0.926845	1.14156	4.86241	2.46085	0.976202	3.94002	3.24247	2.96789	4.36123	4.43579	2.01295	4.54525	4.40812	5.34878	5.2377	3.89994	4.43562	3.83994	5.05685	8.32437e-05
IGLV5-39	no	no	-1.5418	-1.99838	-2.05497	-1.21066	-2.1136	-1.43035	-1.70615	-1.87455	2.65213	1.0695	2.29559	2.03152	-2.92531	-0.450998	1.08097	0.198262	-2.42569	-0.909017	-2.66632	-2.81346	-1.69956	1.12741	-2.03337	-0.0885484	-1.67676	-2.02665	-1.5885	-2.18742	-1.82939	-0.706649	-1.59763	3.07362	-0.991913	0.188238	1.15796	0.00422618
IGHV7-4-1	no	no	-4.21924	-3.617	-3.65342	-3.46183	-4.40078	-3.20827	-3.79288	-3.54974	-4.06944	-2.19349	-2.44336	-3.2091	-3.56091	-2.74957	-3.97445	-4.07203	-4.20647	-3.32553	-3.28674	-3.8428	-3.63617	-4.04443	-3.63287	-3.4813	-3.55797	-3.76346	-3.60045	-3.87065	-3.53828	-0.886414	-3.70987	-3.97907	-2.07609	-3.6545	0.332112	0.0906128
IGHV3-64D	no	no	1.24384	1.07166	0.60289	-3.87176	-0.120953	0.545738	0.100055	2.65588	4.03397	4.36113	4.80773	4.58535	1.46238	2.68569	5.62371	5.66441	0.0319404	2.76257	3.70435	4.1743	1.00298	4.27306	3.9037	2.4485	4.63733	1.82893	4.15995	1.88059	5.28583	5.36189	4.07234	4.15089	4.44619	4.97799	3.55866	0.00355391
TRBV10-1	no	no	-4.26005	-4.6766	-2.28262	-4.81603	-4.13893	-3.7663	-4.78881	-4.78255	-3.92787	-4.334	-5.0963	-4.61292	-4.35239	-4.37239	-4.59528	-5.08602	-4.81312	-4.62705	-4.76168	-4.54351	-3.86753	-4.52433	-4.00333	-4.84622	-4.98198	-4.67271	-4.71571	-4.67917	-3.18094	-4.50135	-4.50382	-4.40002	-4.69785	-4.2225	-0.222963	0.596276
SMIM32	no	no	-1.96453	4.06284	-1.35169	-2.51525	-0.324313	2.95476	1.59024	2.03798	1.26391	-2.47063	-2.38222	-2.49238	2.23862	2.58282	-2.29309	-0.479455	2.94891	-2.11473	0.753941	0.294618	3.26308	1.14459	2.32826	-1.8848	-0.436278	-0.215379	1.86578	1.12449	-0.147879	-0.896778	0.474791	-2.48824	0.973762	-0.219553	-0.331605	0.779793
IGLC7	no	no	-3.28634	-3.48665	-2.86364	-3.43301	-3.57202	-3.11951	-3.30191	-3.89949	-0.298683	-1.89462	-3.10566	0.853173	-1.6053	-1.97335	-1.13986	-5.0844	-3.18815	-3.62307	-2.93786	-0.76624	-3.70097	-0.606416	-3.78134	-0.500599	-3.08413	-1.63293	-3.21302	-2.59592	-3.33439	-2.82655	-0.662668	-3.13262	-0.893613	0.517988	1.33875	0.00350772
BICDL2	no	no	#NUM!	#NUM!	#NUM!	-3.77472	#NUM!	#NUM!	#NUM!	#NUM!	#NUM!	#NUM!	#NUM!	#NUM!	#NUM!	#NUM!	#NUM!	#NUM!	#NUM!	#NUM!	#NUM!	#NUM!	#NUM!	#NUM!	#NUM!	#NUM!	#NUM!	#NUM!	#NUM!	#NUM!	#NUM!	#NUM!	#NUM!	#NUM!	#NUM!	#NUM!	#N/A	#N/A
SSC5D	no	no	-3.6997	-1.62535	-3.63481	-1.67943	-3.41006	-1.93504	-3.85543	-3.44451	-1.62134	-2.97737	-3.63047	-6.14231	-3.25711	-2.84865	-3.95815	-0.481965	-2.01365	-4.01956	-2.86316	-3.88076	-2.23286	-2.08533	-2.29138	-1.96574	-3.81519	-1.75092	-2.62865	-2.6876	-3.5565	-4.18234	-1.3268	-2.62331	-2.22409	-2.41405	0.0627779	0.919744
TTC24	no	no	2.87356	2.38234	3.67386	2.88041	2.25812	2.96464	2.14431	3.14852	4.25825	5.27112	6.09288	5.22703	1.6796	4.22987	6.64399	6.01385	2.16662	2.60816	2.77747	4.53162	-0.068292	6.62934	4.92348	5.38489	6.43651	5.10904	2.33727	2.39461	6.13441	5.32089	3.60464	5.62165	3.66156	3.39504	1.83263	0.000119582
IGKV2-29	no	no	-2.52299	-2.80096	-3.13636	-2.68925	-1.49965	-3.01226	-1.29048	3.93524	0.0258434	0.413682	-3.32596	-2.2623	-1.71976	3.94648	-1.30565	-1.86052	-3.08737	-2.03752	-3.49109	-2.54901	-1.87938	-2.60011	-2.55225	-2.54096	-2.22782	-2.99721	-2.1314	-2.07391	-2.79238	-0.720101	-1.30575	-1.85805	-2.54912	-2.1457	1.39283	0.00499605
FITM1	no	no	-3.08449	-2.10716	-2.98222	-3.08866	-1.90439	-2.696	-3.07243	0.165258	0.889192	-1.79194	1.36859	-0.588069	-3.63633	-1.261	3.42627	0.559806	-2.65229	-2.94737	-1.08115	-0.249524	-2.81784	-0.423039	0.62853	-1.06594	2.60662	-1.57222	0.45194	-1.01862	1.06732	-1.85974	-0.558824	-0.457008	-1.06426	-2.51307	1.81253	5.87055e-05
VPS37C	no	no	-3.39287	-3.11012	-3.72529	-3.41826	-3.94995	-2.10793	-3.92205	-3.1217	-2.37442	-2.11758	-3.16153	-3.88309	-1.40462	-2.73116	-3.83262	-3.65792	-1.58823	-3.60408	-3.69969	-3.87211	-1.52106	-2.2444	-3.90825	-3.11653	-3.64722	-3.52763	-3.45667	-1.79164	-2.06559	-3.77628	-3.03967	-3.72116	-1.64546	-3.75079	0.269832	0.404856
PGP	no	no	-4.56261	-4.615	-4.53457	-4.34937	-4.58794	-4.33171	-4.26491	-2.75969	-3.72359	-3.38831	-3.2993	-2.03471	-4.1874	-4.40753	-2.75541	-4.42184	-4.44465	-3.59042	-3.07284	-4.62818	-4.38433	-4.4297	-4.60969	-3.44843	-4.7214	-4.06622	-4.44065	-4.43922	-4.04286	-4.03081	-4.30346	-2.29708	-3.07986	-4.76372	0.602082	0.00207563
GRXCR2	no	no	-1.82273	-1.43109	-2.24347	-3.244	-1.47627	-2.35629	-2.7257	-0.591123	-3.8925	0.609285	3.6645	-1.74088	-1.50498	0.122365	-0.855693	2.14329	-0.692484	-1.1536	3.80655	1.95936	-0.6741	1.57728	0.746824	-2.76401	-1.34164	0.68147	0.448001	0.721241	0.56421	0.941805	2.92329	-1.46355	0.719618	1.53046	2.00946	7.15863e-05
IGLON5	no	no	-3.10957	-2.78809	-2.49289	-2.6753	-2.42259	-2.04997	-2.98015	-0.95056	-2.25184	-1.71222	-3.05123	-2.52534	-0.206131	-1.38137	-2.22334	-1.22582	0.540729	-2.88464	-1.68691	-2.80431	-1.0926	-2.24099	-0.719921	-3.00454	-2.55917	-2.67005	-0.787638	-2.56361	-3.0533	-3.17024	-0.663055	-2.67953	-0.960557	-1.63097	0.712361	0.00612446
EPOP	no	no	-2.5724	-1.04021	-2.72074	-1.18387	-2.55371	-0.836313	-1.80916	-1.46654	-2.1926	-3.38413	-2.77506	-2.62081	-2.6179	-2.18608	-2.27353	-2.40177	-1.20847	-2.48294	-2.7036	-1.86832	-1.7396	-2.70194	-2.79132	-1.41565	-2.26731	-2.87185	-1.50583	-0.00230105	-2.48007	-2.63693	-2.67733	-2.77461	-2.32973	-2.47441	-0.489389	0.222797
LILRA5	no	no	-1.36467	-1.32902	-1.46071	-1.29243	-1.25794	-1.60367	-0.822508	2.28935	2.79388	0.667699	-2.09996	-1.15151	-0.803645	3.34989	-1.47315	0.263356	-1.44368	0.057706	1.9323	-1.7578	-0.0841176	-0.103548	0.775166	-0.470745	-0.341182	3.07594	1.01988	1.63784	1.76449	-0.499701	0.575319	1.06878	2.07341	0.0436529	2.07597	7.15719e-05
SHISA7	no	no	-4.79127	-5.36515	-5.09248	-5.33708	-5.01917	-5.32016	-5.18601	-4.78033	-4.57678	-5.48361	-5.42455	-4.75867	-3.66815	-4.26813	-5.38725	-4.87863	-2.15893	-5.39614	-4.75615	-3.82606	-5.47323	-4.3446	-3.80209	-5.00777	-5.26951	-4.85002	-3.94384	-4.02438	-4.84255	-5.2454	-5.30255	-5.24038	-4.30846	-4.98549	0.531238	0.0125498
A2ML1	no	no	-1.87858	-1.54133	-2.72034	-0.752028	-3.06796	1.47245	-2.35416	-1.59748	2.30866	0.868315	-1.21492	-2.25845	-1.00646	2.94086	-1.51564	-2.78766	-1.61674	-0.948586	0.243017	-2.39553	0.138178	0.167072	-0.736882	-2.72515	-2.07263	-2.39333	0.184158	-2.03427	-1.95292	1.93802	-2.73729	-1.5649	-2.88257	-1.49278	0.177256	0.813982
CLCA1	no	no	-3.43192	-5.27023	-2.93518	-2.52637	-3.59734	-2.62102	-3.09603	-1.70707	-1.9049	-3.92375	-3.64774	-3.69365	-1.96877	-3.77013	2.5428	-2.5657	-3.60638	-3.77139	-4.38515	-3.90515	-3.00673	-3.94591	-3.75129	-4.83729	-4.2694	-4.37757	-3.37657	-3.25688	-3.65077	-3.59827	-2.66123	-4.84303	-3.56992	-4.88295	0.137924	0.792698
CYSRT1	no	no	-3.1188	-2.94246	-3.56043	-2.9618	-2.94117	-2.67416	-3.51759	-2.9093	-1.64679	-3.53069	-3.23365	-3.33565	-3.43646	-2.9088	-3.33023	-2.83842	-3.42766	-3.19115	-3.29941	-3.198	-3.31997	-3.27787	-3.13565	-3.11621	-3.01482	-3.35278	-3.25521	-3.27288	-3.33848	-3.26783	-3.43888	-2.96979	-3.42685	-3.46236	-0.00708375	0.965088
EIF3CL;EIF3C	no	no	-3.24024	-3.43948	-3.54364	-1.27952	-3.36665	-3.31727	-3.96422	-1.4734	-2.2465	-3.30018	-3.31889	-3.01141	-3.32234	-3.57206	-2.09386	-2.57221	-3.78017	-2.98902	-3.24419	-3.60169	-2.9743	-4.04017	-3.03142	-3.40431	-2.36478	-3.18837	-3.3463	-3.2068	-3.17136	-2.38594	-3.44441	-0.579156	-3.44665	-3.71096	-0.0995019	0.797544
IGLL5;IGLC1	no	no	-0.841173	-0.978574	-0.494114	-0.958376	-1.58293	-1.68461	-2.01958	-2.23643	3.02821	2.79718	3.15381	3.34638	-0.0538542	1.72772	2.12552	1.8203	-1.31442	-0.593118	-3.069	1.82059	-2.3921	2.71813	1.73603	1.49656	1.81642	2.99779	-1.45254	0.0550963	1.1945	1.24741	2.99487	3.52697	2.43782	2.55764	2.05496	0.000102834
AKR1B15	no	no	-4.61867	-4.61544	-3.90023	-0.384521	-4.46089	-4.27591	-4.26432	-3.05721	-1.79493	-5.00037	-3.7466	-3.9116	-4.77219	-4.6804	-1.17031	-4.10981	-4.08152	-4.29845	-3.06849	-4.08684	-4.18873	-4.2224	-2.83198	-4.41634	-4.72906	-3.02807	-4.47762	-3.59968	-4.1841	-4.34674	-4.32604	-3.25897	-4.1815	-3.57948	0.0773872	0.925515
NACA	no	no	-3.59469	-3.65771	-3.90117	-3.03748	-3.95502	-2.68457	-3.36265	-1.24796	-1.93623	-1.25997	-0.878648	-3.40094	-1.41646	-3.46067	-1.43218	-2.4076	-3.97906	-2.88251	-1.06472	-2.03442	-4.03283	-2.97832	-3.9184	-1.51675	-3.08472	-0.998663	-3.2177	-3.14237	-4.00569	-2.19772	-2.75013	-1.88686	-2.52121	-0.398842	1.05451	0.000932509
SMIM22	no	no	-4.82702	-4.42352	-4.68498	-5.08561	-5.2262	-4.57305	-4.37735	-3.09926	-4.06712	-4.85131	-4.25828	-3.40353	-3.06556	-3.99874	-4.57757	-4.79948	-1.59887	-4.71976	-3.1247	-4.67028	-4.29148	-4.10396	-2.47123	-5.12869	-5.04799	-4.85828	-3.04652	-3.64595	-3.38335	-2.90732	-3.54464	-5.09668	-2.08532	-3.30629	0.685581	0.01206
DNASE2	no	no	-2.14045	-0.883882	-0.694877	-0.934938	-1.12598	-0.879446	-0.887653	1.10196	2.18294	2.11856	-1.44032	2.02457	-0.0837355	3.34709	-0.540169	-0.347143	-0.634147	-0.793246	1.92068	0.231308	-1.16893	1.21952	0.00571387	2.19875	-0.608464	1.64555	1.09741	2.17026	1.02567	-0.579008	1.71701	-0.315175	2.11904	-0.0128764	1.86461	3.91525e-05
FZD9	no	no	-2.25236	-2.24807	-2.03045	-1.72127	-2.55549	-2.59519	-2.29973	-0.381459	-2.02424	-0.826468	-2.23719	-2.56172	0.638489	0.214076	-1.98124	-2.55549	0.403744	-3.02378	-0.766444	-2.08788	-0.075598	-1.33575	-2.41249	-2.56385	-2.27645	-3.45906	-3.03656	1.10127	-2.53365	-2.89617	-1.54923	-2.56052	-1.13828	-0.775872	0.803095	0.0245814
PDLIM1	no	no	-2.87415	-2.84931	-2.84857	-0.738886	-2.67336	-1.14137	-2.86554	1.63435	0.934345	-0.227435	-2.60467	-3.16669	-0.404571	-2.53062	-1.31147	-0.533957	-2.49574	-2.23683	-0.410656	-1.5965	-2.03687	-1.64325	-2.33523	-0.380954	-0.866931	-0.711656	-1.77058	0.192405	-0.657344	-2.97732	-3.08562	-1.8707	-1.11221	1.05777	0.900585	0.0705693
MYO1C	no	no	-1.86985	-1.72809	-2.89448	-1.66946	-2.98485	-1.65986	-3.07654	-1.37354	-2.37454	-1.69584	-3.61347	-1.93706	-0.379773	-1.33422	-3.47858	-2.73687	-1.08905	-2.56785	-1.88729	-2.37101	-0.130888	-1.3824	-2.12549	-0.43689	-4.16268	-2.40512	-1.94083	-1.09123	-2.35744	-3.33943	-1.5988	-3.27607	-0.824867	-1.63921	0.369902	0.381933
MYO1F	no	no	-5.01117	-5.07116	-5.06223	-5.14331	-4.75341	-5.2237	-4.6531	-4.77735	-2.86156	-4.71168	-5.4672	3.04836	-5.78713	-5.42622	-3.51954	-1.56723	-6.30124	-5.26552	-5.23782	-5.68121	-5.649	-5.86709	-5.53333	-1.87901	-3.02606	-5.24108	-4.90764	-4.96406	-4.77621	-2.35866	-3.55224	-2.604	-1.41595	-6.0633	1.38433	0.00673958
SNAP23	yes	no	-3.25713	-3.48527	-3.11481	-2.96177	-3.56207	-1.76194	-2.83932	-1.74175	-2.56195	-2.6175	-3.1125	-2.11935	-3.16735	-2.12448	-2.89327	-2.93889	-0.937734	-2.23274	-2.00123	-3.13834	-0.862262	-2.83394	-1.97737	-1.08142	-3.68947	-2.2906	-2.07583	-0.793763	-2.15699	-1.99103	-3.13056	-2.5722	-1.21987	-2.06284	0.751529	0.0185125
LGALS9	no	no	-1.92566	-1.83598	-1.37504	-1.81499	-1.42608	-1.73823	-1.32756	1.00475	0.692878	0.423621	-2.15637	-0.91251	-0.18267	2.53083	-1.44549	-0.460999	-1.20693	-1.38302	1.26974	-1.94093	-0.736566	-0.307799	0.122433	-1.60344	-0.768425	0.585018	0.184049	0.931852	-0.133641	-1.57489	-0.0293612	-1.39171	1.18	0.107826	1.38821	6.53966e-05
MASP2	no	no	-0.842392	-2.59072	-0.0980143	1.33791	-1.0285	0.668975	-1.305	5.33395	6.77427	4.07948	1.09396	4.41675	3.98257	5.3716	2.99613	3.19509	0.530297	3.77	5.99273	2.8842	3.82603	5.58023	3.6813	1.45119	2.13422	2.84253	7.59673	5.31837	6.11356	4.77312	6.31512	0.839827	2.61602	3.18311	4.1621	0.000329893
SMAP	no	no	-3.10448	-1.79823	-4.3185	-2.78666	-2.05696	0.348805	-1.91948	-2.10592	-2.3118	-4.41196	-2.71242	-4.51689	-1.52531	-2.47882	-4.48155	-4.34814	-1.93866	-3.68278	-1.36324	-2.64074	-0.540963	-3.82578	-4.30794	-1.07123	-3.8085	-4.16144	-4.2824	-1.8741	-4.04852	-4.53125	-3.77802	-4.64168	-3.7868	-3.1058	-0.990015	0.168576
PSMD11	yes	no	-4.00422	-4.07733	-3.77192	-4.04475	-4.0819	-4.02152	-3.58345	-2.27525	-1.92545	-2.89634	-2.656	-3.74444	-4.0205	-4.05689	-2.73246	-2.74186	-3.94814	-2.14861	-3.21395	-3.51539	-3.66121	-3.86632	-3.57186	-3.52958	-4.46377	-3.56612	-3.9133	-3.58208	-2.90674	-2.30384	-3.12617	-1.87665	-3.725	-3.90419	0.527738	0.0110915
PSMD12	yes	no	-3.68117	-3.46244	-3.74441	-3.3699	-3.79311	-3.38109	-3.81684	-2.31854	-3.96327	-2.87098	-2.05175	-3.43845	-3.57223	-3.50148	-1.94172	-3.56571	-3.4155	-3.212	-3.81193	-3.8051	-3.64481	-3.55987	-3.73879	-3.49308	-3.81705	-3.35213	-4.22699	-3.65665	-3.58897	-3.46177	-3.63627	-2.46249	-2.90644	-3.42667	0.240871	0.0898925
PSMD9	no	no	-3.72799	-3.65259	-3.28338	-3.41618	-3.38299	-1.12378	-3.53527	-1.91381	-3.01124	-3.82251	-0.647265	-1.85437	-2.90545	-2.66487	-1.51986	-3.32998	-3.80548	-1.40488	-2.13171	-3.27322	-2.16165	-2.89827	-3.30318	-1.66949	-1.37218	-1.17432	-3.4475	-3.64554	-3.28487	-3.17794	-2.83484	-2.11576	-3.6788	-3.50955	0.395397	0.40273
SIRPB1	yes	no	-1.25317	-1.11336	-0.96019	-1.3221	-0.869093	-0.720526	-0.352947	3.65401	2.76181	2.38895	-0.771197	0.290176	3.65729	4.09342	-1.04242	-1.29887	3.38797	1.7123	3.97731	1.79331	0.920355	1.47903	0.369175	0.432322	0.33401	2.17923	3.08282	4.49937	1.63607	-0.188807	1.94716	2.00704	4.56667	1.76185	2.7749	4.71757e-06
ATOX1	no	yes	-2.17555	-2.15118	-1.87571	-1.36157	-1.90009	-2.36772	-2.75204	0.974874	2.36849	1.35282	-0.451828	-0.311989	-1.46128	1.06523	-0.355213	-3.16118	-1.58425	-1.0441	3.61626	0.549543	-2.67435	1.60036	-2.83339	-0.464057	-2.3499	2.28553	-0.0921232	2.83728	0.182721	-1.84708	1.91533	0.760308	2.46207	0.825116	2.07391	7.92446e-05
PGRMC1	yes	no	-1.58086	-1.16367	-2.88466	-2.29629	-2.62293	-3.12556	-2.83195	-1.15993	-0.161434	-2.39925	-2.78218	-2.76825	-1.86338	-1.3086	-2.4846	-2.69731	-0.935063	-3.04402	-1.48999	-1.6985	-1.80462	-2.11651	-3.38861	-1.38763	-2.84042	-1.95149	-1.60215	-0.888464	-3.03082	-2.97428	-0.944173	-3.51226	-1.95516	-1.85528	0.32915	0.40273
CLIC1	no	no	-2.26231	-0.588381	-0.775529	-1.97796	-1.41511	-1.4614	-2.96866	1.68953	1.61566	1.13864	2.38262	1.63088	-0.213425	-1.03897	2.14568	1.53232	0.00450792	1.41583	1.60896	-0.928232	-0.535969	-0.5662	-0.208646	-0.0435727	1.36646	1.78692	-0.164161	0.398641	0.926449	1.09683	-0.101412	2.72067	0.824265	0.195705	2.79664	2.66609e-06
EIF3F	no	no	-3.30333	-3.22398	-3.23639	-2.90964	-3.60171	-3.03509	-3.15862	-2.8449	-2.37604	-3.04524	-3.08506	-3.37591	-3.14934	-3.2596	-1.71858	-2.51476	-3.15775	-3.27911	-3.01284	-3.51716	-3.15366	-3.4642	-3.38754	-3.37986	-3.19442	-3.08032	-3.01719	-3.5308	-3.08968	-3.07144	-3.1906	-2.27134	-3.1033	-3.13949	0.143112	0.177968
UPK1A	no	no	-3.72631	-2.77749	-3.48875	-3.74648	-3.72797	-2.56509	-3.60847	-1.74531	-4.14466	-2.99597	-3.88376	-3.63093	-1.54347	-3.49156	-3.69828	-3.58989	-3.59342	-3.62308	-2.48961	-3.48421	-1.07846	-2.30252	-3.33902	-1.56845	-3.54818	-1.25767	-3.43586	-3.8403	-3.67142	-1.67947	-1.56358	-3.77754	-3.28912	-3.84398	0.353351	0.270489
SLC28A1	no	no	-4.05305	-1.88173	-4.54051	-0.423401	-3.33005	-1.06545	-3.81936	-3.56409	-3.06832	-4.29137	-4.36062	-4.34078	-2.76899	-4.39947	-4.58537	-4.6403	-2.43472	-3.61444	-2.1175	-3.83362	-1.25828	-3.74754	-4.55386	-3.34884	-4.06338	-3.87835	-4.21258	-1.25883	-4.34043	-4.28007	-4.4936	-3.80757	-4.26982	-4.32992	-0.758721	0.344434
QSOX1	yes	no	1.3598	0.488127	0.205431	-0.472157	0.580761	-0.386895	1.12624	2.57917	2.62132	2.63379	2.18319	4.21821	2.16228	2.9098	2.53157	3.19082	1.09332	0.752635	2.29402	1.45712	1.15774	2.35302	2.16031	2.50224	3.26915	3.40837	2.82606	2.05056	2.57476	2.15047	2.31018	2.09389	1.62607	0.56777	1.99324	1.46705e-05
IPO5	no	no	-4.39223	-4.28788	-4.58025	-4.52161	-4.34615	-4.36906	-4.44715	-3.43207	-3.08158	-4.14963	-3.71611	-3.41058	-4.35492	-4.46868	-2.68101	-4.44502	-4.30747	-4.41768	-3.48225	-4.50094	-4.36027	-4.49852	-4.23511	-3.65037	-3.36221	-4.26293	-4.43548	-4.81922	-4.32436	-4.41404	-4.4316	-2.53201	-4.45231	-4.27598	0.438751	0.00444311
DNM1L	no	no	-5.02521	-5.58406	-4.83925	-5.05988	-5.08391	-3.36852	-4.73584	-4.03853	-3.47736	-5.41045	-4.48369	-5.63016	-5.12654	-4.75553	-1.91471	-5.067	-5.05136	-4.4327	-4.86723	-5.29998	-4.99221	-4.87209	-5.50027	-2.71013	-5.73944	-4.94497	-4.69397	-3.49059	-4.81634	-4.93425	-4.57454	-1.85811	-4.81423	-4.67372	0.220642	0.568429
LST1	no	no	-2.87397	-4.26501	-3.74664	-3.51083	-4.81425	-2.64539	-3.74841	-2.98623	-2.08847	-3.19237	-1.65426	0.0806436	-3.55172	-3.40711	-0.833355	-0.849137	-3.60428	-2.02565	-2.97584	-3.08158	-3.56518	-3.88334	-3.57881	2.31067	-2.457	-2.02663	-4.08402	-3.20221	-2.86067	-3.4185	-4.1176	-3.47461	-2.69206	-3.46549	1.21904	0.00154423
GOLIM4	no	no	-4.29623	-4.07667	-4.03599	-4.52165	-3.96769	-1.77745	-3.49757	-2.42334	-1.13892	-3.2544	-3.43852	-5.07915	-2.05565	-2.57848	-3.66863	-3.9953	0.37084	-4.28708	-1.95563	-2.17703	-3.68349	-2.29054	-3.03614	-2.81267	-3.69724	-4.18635	-2.27564	-1.45401	-3.13218	-3.92627	-1.48078	-2.7633	-2.70601	-3.35736	0.838855	0.0950498
MANBA	yes	no	-0.886352	-0.436846	-0.21709	-0.19785	-0.929444	0.986797	-0.764768	0.854798	0.784332	1.00947	-1.36174	1.69154	0.432567	1.63113	-1.0779	-0.291974	1.88382	0.578188	1.6368	-0.892209	1.8511	0.403927	1.15387	1.8431	-1.52325	0.694489	0.620773	2.44023	0.610115	-0.461893	0.462735	-0.274094	2.48511	0.482104	1.21126	0.0085719
AGRN	no	no	-1.21276	0.134653	-1.50682	0.316954	-1.4439	0.299334	-1.57436	0.122168	0.810187	-0.00391484	-2.55347	-0.363006	0.226367	0.0233385	-1.03199	-0.883951	0.107324	-1.84509	-0.162854	-0.812594	-0.24414	-0.329131	-0.54087	0.188616	-1.9737	-0.689659	0.54134	0.0517764	-0.567365	-0.799747	0.295191	0.237623	-0.285706	-0.86852	0.160092	0.703667
PSMD14	yes	no	-4.39482	-4.72458	-4.25609	-3.70385	-4.53918	-1.16795	-4.28336	-2.23678	-1.60895	-4.09861	-2.15612	-3.92579	-4.68064	-3.85655	-4.10926	-2.82524	-4.05286	-3.76524	-2.46228	-4.21024	-4.70319	-4.31635	-3.83444	-2.45353	-2.14713	-2.07612	-4.13855	-3.83834	-4.51664	-4.50516	-4.63855	-0.922223	-4.02885	-4.3998	0.191587	0.763454
BIN1	no	no	-1.48697	-1.91139	-1.69746	-1.79834	-1.24459	-1.2489	-1.26352	-0.0813575	0.295142	1.14865	-1.83464	-1.7835	0.185058	1.25789	-1.50552	-0.79928	-2.1042	-1.11295	0.412137	1.26937	-1.28483	-0.816855	-1.53283	0.526921	-1.75081	0.645074	0.447887	1.04089	-1.4336	-1.22131	1.68419	-0.854284	-0.0529236	-1.32484	1.18827	0.000216145
LAD1	no	no	-1.62761	-1.61544	-3.0824	1.37828	-1.95344	0.376988	-2.51746	-0.0569993	-2.08812	-1.55429	2.72956	-2.94421	-1.86104	-1.78127	-2.31097	3.06916	-2.67638	-1.79362	-3.12048	-2.76949	-2.37122	-1.55191	2.60242	-2.3527	-2.80866	-2.3259	-0.451781	-1.15422	-2.56255	-0.990613	-3.57511	-1.77665	-2.48019	0.619214	0.11632	0.900237
UPK2	no	no	-0.738561	-1.60215	-3.11777	-0.798293	-3.2501	-0.964059	-0.80682	-1.46224	-3.65948	-3.05375	-3.26576	-2.67343	1.26256	-1.33642	-2.39545	-2.20694	-3.88299	-2.79274	0.405014	-2.4549	-0.24966	-1.7633	-3.02275	1.0176	-1.29106	-0.511049	-1.75849	-2.6366	-3.04753	-1.9548	-0.357871	-3.39871	-2.14268	-2.28636	-0.431794	0.409729
CHL1	no	no	-0.385702	0.00620662	-0.0680271	0.18274	0.0953145	-0.280612	0.00411162	1.77439	2.6157	1.50761	0.378017	0.0183285	2.00538	2.65603	0.124884	1.69994	-0.563315	0.99662	2.04485	0.0863668	1.13404	1.93287	2.6469	0.710167	1.35883	1.00223	1.90441	0.840897	1.25049	1.84645	-0.364855	-0.118952	2.70309	2.10348	1.43592	6.44999e-06
SDCBP	yes	no	0.741412	0.89452	-0.214427	1.45105	1.00143	3.47815	1.74073	4.30685	3.74147	4.62736	1.58631	4.63892	5.25514	4.59282	1.12308	2.06928	4.62579	3.4666	4.33657	1.66083	4.96635	3.45551	4.54235	4.54718	2.84275	2.89895	3.16485	5.18144	3.80654	2.71771	3.84275	2.38946	5.39239	3.28749	2.26372	0.00235584
DDX3X	yes	no	-4.06927	-4.92135	-3.792	-3.84908	-4.2762	-4.25165	-3.66915	-4.00388	-4.14608	-3.86892	-3.70136	-1.92693	-3.62192	-4.23888	-2.43288	-4.16639	-4.3504	-3.91748	-4.05579	-4.37307	-4.60336	-3.80771	-3.73341	-4.04209	-4.1182	-4.35458	-4.4453	-4.02085	-4.23071	-4.10016	-4.1469	-4.34728	-4.38063	-3.93488	0.365509	0.0774545
RNASET2	yes	no	0.335629	0.308658	0.548464	0.447882	0.284586	0.463523	-0.0530016	1.03849	3.65821	1.93964	0.734199	3.73438	0.95149	2.71364	0.479388	0.165817	1.96618	0.985112	2.99012	0.821493	1.81092	1.81219	1.54227	3.05961	0.144648	3.13024	2.63414	3.08195	0.879541	0.0829263	4.06423	1.93048	1.77306	0.186253	1.76369	6.37408e-06
PODXL	no	no	3.1091	2.14882	1.32212	1.83796	-0.119317	4.09483	2.24863	2.35614	2.93734	2.6922	-2.15091	2.03983	3.33359	2.24808	-2.03271	-0.221082	3.99792	1.61768	2.54467	1.01067	4.52468	2.41025	2.64108	2.20373	0.769009	0.620337	3.46447	2.39089	1.41017	0.481907	1.97758	-0.0523601	4.30616	2.00831	-0.257302	0.727106
FCN1	yes	no	-4.01376	-4.6056	-3.835	-4.96993	-3.98187	-4.53455	-4.12243	-4.9571	-3.99742	-1.59642	-0.783835	-1.92506	-4.28639	-3.1579	-0.854969	-3.90677	-4.39237	-4.38845	-1.75073	-4.48101	-4.28843	-4.86995	-4.08818	-4.03108	-3.32417	-2.70224	-4.81181	-2.44912	-4.32185	-3.84979	-2.96983	-0.622532	-2.98284	-2.62479	0.937023	0.020017
CCN1	no	no	-1.84365	-1.91456	-2.12114	-0.776681	-3.31728	-1.10223	-1.49755	-2.03812	-3.71452	-1.60156	-3.11056	-3.59736	-0.842325	-0.521323	-3.64098	-3.49336	0.222921	-3.32962	-1.80188	-1.69322	-1.35803	-2.54683	-2.16099	-0.972757	-3.06362	-1.83133	-2.63006	-1.28868	-1.95703	-3.80515	-2.15049	-3.7976	-1.86424	-3.73168	-0.609341	0.157685
MAN2B1	yes	no	-3.31476	-3.19408	-3.86946	-3.15639	-3.57922	-3.65621	-3.72737	-2.60156	-0.735805	-1.74216	-3.29864	2.02696	-3.83794	-0.546544	-2.00009	-3.36189	-4.18969	-3.67438	-1.33378	-4.00453	-3.52997	-2.73629	-3.04784	-1.33313	-2.65253	-0.88436	-3.24793	-1.62972	-2.01391	-2.27815	-0.00688157	-1.56302	-1.33874	-2.79985	1.16492	0.0013216
FBP2	no	no	-0.810782	-0.362441	-0.488004	-0.812563	-0.325655	-0.501057	-0.147364	3.12747	3.81211	2.1204	0.859854	3.26974	-0.0556965	0.048601	0.82388	0.870055	-1.37094	0.0714446	1.95255	0.851344	-0.720753	0.735627	0.0916807	2.25447	1.88662	2.10158	-0.479357	1.62505	0.53968	1.21599	0.390162	1.4077	2.16164	1.50179	1.54727	3.75516e-05
PDXK	yes	no	-2.01024	-1.89847	-2.23119	-2.10724	-1.94422	-2.04097	-1.90124	-0.0152407	-0.273407	-0.921227	-1.10608	-1.69644	-2.20132	-2.81143	0.608026	-0.59233	-1.8394	-1.0471	-0.712275	-2.22122	-1.60767	-2.06908	-2.44493	-1.90312	-0.944555	-0.939508	-2.19566	-2.22897	-0.348702	-0.744658	-1.69619	0.964238	-1.26424	-2.36144	0.735592	0.00254788
ISLR	no	no	1.38694	1.9644	1.49112	2.94921	1.96078	2.77168	1.64111	4.39129	5.36521	3.10927	0.661985	1.99197	2.97896	3.13978	0.763564	2.92095	3.14364	1.9136	4.4274	3.41543	2.94815	4.13809	2.92489	2.64472	1.62255	3.13973	4.18562	3.72633	3.93403	2.5963	5.36644	1.94904	4.30352	2.35961	1.14546	0.00594936
GAPDHS	no	no	-2.87532	-2.6769	-3.73269	-3.54405	-3.73877	-4.57383	-5.36866	0.16791	-4.41317	-3.50067	-2.35155	-5.58332	-4.94911	-4.29122	-4.05377	-3.26605	-2.47416	-2.71532	-3.91251	-3.74175	-4.14589	-3.25872	-4.74463	-2.46686	0.0162397	2.65534	-0.615055	-2.65967	-4.56982	-3.23066	-2.72991	2.75498	-5.29588	-4.15972	0.883524	0.129838
NCAN	no	no	-5.51572	-2.12274	-4.53775	-5.28452	-5.38416	-4.0466	-5.57391	-5.09997	-5.075	-5.83636	-5.72143	-5.33987	-3.79253	-4.99606	-5.39613	-5.75179	-1.48299	-5.66731	-4.79821	-5.46303	-4.16954	-4.55838	-5.67018	-5.50895	-5.63046	-5.84537	-3.65461	-3.744	-5.87579	-5.75886	-5.03585	-6.13807	-6.10321	-5.27953	-0.204115	0.762287
EIF1AY;EIF1AX	no	no	-4.20123	-2.42809	-3.90191	-3.70664	-3.88494	-2.267	-3.06504	-0.496179	-3.72015	-3.19848	-3.73494	-3.93528	-2.17418	-3.84618	-4.02226	-3.73302	-1.22432	-3.37464	-4.5356	-3.36471	-1.95328	-3.30835	-4.01609	-3.71772	-3.65508	-3.80258	-2.09994	-1.90564	-3.93824	-3.18182	-2.95187	-1.84784	-3.45644	-3.56162	0.349388	0.451748
CCS	no	no	-2.52105	-2.41456	-2.61576	-2.46242	-2.8172	-2.8409	-2.876	-2.07967	-1.99639	-1.73449	-2.64301	-2.84142	-1.67147	-1.78528	-1.75512	-2.69333	-2.48347	-3.07537	-2.12024	-3.00524	-2.53957	-2.67608	-2.49985	-2.8099	-2.73891	0.164062	-1.62425	-2.35708	-2.79714	-2.4308	-1.99993	-1.58737	-2.77046	-2.60838	0.404248	0.0142802
ABLIM1	no	no	-1.52659	-1.7329	-1.92077	-0.667646	-1.65955	-1.33881	-1.57179	-1.59297	-1.69278	-1.60985	-1.57485	-1.70295	-1.8982	-1.62544	-1.56799	-1.60427	-1.61437	-1.49148	-1.56744	-1.8007	-1.64803	-1.53155	-1.69961	-1.72149	-1.7917	-1.66752	-1.47029	-1.71697	-1.86914	-1.91238	-1.80367	-1.56627	-1.39605	-1.49864	-0.205746	0.28451
ADAM10	yes	no	-3.16162	-3.3962	-3.101	-3.01166	-3.1165	-1.82345	-3.15231	-1.77746	-1.97316	-2.97683	-2.8648	0.889946	-1.69955	-2.62768	-2.71471	-2.36455	-1.60227	-2.83593	-2.94068	-3.50638	-2.58052	-2.77987	-2.60608	-2.30687	-1.82106	-2.35513	-1.61703	-1.51	-2.09989	-1.77322	-3.49547	-2.1665	-2.36887	-2.46677	0.825319	0.0187586
IMPA2	no	no	-2.92837	-2.6742	-2.7261	-3.28958	-2.78856	-2.90533	-3.67897	-1.42878	-0.648084	-0.686423	-0.715715	0.711867	-3.11614	-2.68039	-1.89536	-1.78962	-3.42916	-2.26874	-1.37226	-2.21572	-2.56236	-3.013	-2.43963	-3.42805	-1.55895	-0.9625	-4.04878	-1.96473	-2.39395	-1.83253	-1.55007	0.609267	-1.05304	-1.40956	1.3133	0.00011369
PDCD5	no	no	-4.52751	-3.98912	-4.19627	-4.16627	-3.53896	-4.62799	-3.8833	-1.32716	-2.06752	-2.21627	-2.45278	-4.64221	-3.5945	-3.85905	-2.83158	-2.24975	-4.42884	-2.97583	-2.11892	-4.77352	-3.99352	-4.19823	-4.33308	-2.93018	-2.41843	-1.91305	-3.93246	-3.51903	-3.82478	-3.76041	-3.8819	-2.19947	-2.43663	-1.27736	1.05952	6.91821e-05
PRMT5	no	no	-3.9508	-4.35108	-4.43677	-4.54946	-4.30202	-4.08283	-4.79091	-2.47529	-2.10383	-4.73087	-3.64816	-2.88011	-4.52277	-4.33899	-2.25538	-4.53437	-4.39337	-4.03919	-3.14988	-4.24584	-3.85918	-4.2168	-4.15499	-5.3282	-3.54629	-3.16539	-4.58945	-3.86076	-4.82748	-4.06502	-4.03413	-0.636421	-4.07562	-5.08263	0.52812	0.118973
NHERF1	no	no	-1.82639	-0.622732	-0.562197	-1.32362	-0.703061	-0.0390983	-0.997449	0.711892	1.19871	0.739006	2.75609	1.3614	0.311394	-0.422782	0.645043	-0.73526	-0.350845	0.75984	0.921981	1.53814	0.910509	-0.551558	-1.2686	2.26765	-0.298644	1.20253	-0.946586	1.29799	-0.235682	-0.752481	-0.07894	1.33513	1.33969	0.324294	1.40853	7.92446e-05
TPP1	no	no	-2.09779	-2.31552	-2.46631	-2.36707	-2.66369	-1.52732	-3.17749	-1.33991	1.77942	0.262088	-3.02532	0.943652	-1.86276	0.815412	-1.71501	-1.06195	-3.71701	-1.69899	1.24188	-1.1344	-2.1186	-0.227991	-1.31456	-1.57609	-1.09223	0.809993	-0.0764767	0.899525	-0.0451672	-1.03101	1.43021	-0.958924	0.459006	-2.48503	1.67762	9.17699e-05
NRP1	no	no	-1.26534	-1.42072	-2.37856	-1.35326	-1.84576	-1.50826	-1.98717	-0.347133	0.619945	0.294697	-0.578347	-0.594021	-1.67028	0.333198	-1.25051	0.472792	-1.552	-2.47559	-0.017776	-1.20048	-1.79461	-0.0936652	-0.333761	0.235277	-0.589842	0.852867	-0.709429	0.0228659	0.0276934	-0.619803	0.332651	-0.891217	-2.12731	-2.04774	1.14977	1.87863e-05
APOL1	no	no	0.481468	0.374802	1.01556	1.166	-0.108716	0.671997	0.845228	2.6053	0.842095	3.83208	4.07389	1.80489	0.867508	1.8667	4.97859	5.16028	0.554418	0.738809	0.100119	2.68428	0.70673	3.52038	4.11908	2.58439	3.82369	2.71925	1.21783	2.29681	2.61657	2.25245	1.11844	3.11712	2.72109	2.22217	1.63591	7.82727e-05
TNFRSF10C	no	no	-3.86702	-1.36445	-3.61544	-2.1737	-4.09851	-2.81665	-3.54943	-3.762	-2.50428	-2.14125	-3.48344	-3.26359	-2.00992	-1.14666	-3.77292	-3.74388	-4.03865	-4.0087	-1.65907	-3.85674	-3.31082	-3.15388	-3.04937	-2.61398	-3.92131	-1.69825	-3.43057	-4.478	-4.24732	-3.70496	-3.80829	-3.97315	-0.711767	-3.42985	0.00845686	0.989217
PSMA7	no	no	-2.53467	-1.33471	-1.96	-1.14375	-2.62312	-0.31114	-2.69522	0.852214	1.72629	1.12614	1.70708	2.79747	-1.89883	-2.15696	1.31094	0.932691	-2.24696	-0.239802	1.06528	-1.6182	-2.2673	-1.20552	-1.30012	2.37089	0.726245	1.7281	-1.55466	-2.47594	-0.54727	-0.0192255	-1.22353	2.13393	-0.586482	0.553985	1.8502	0.000572879
TAX1BP3	no	no	-3.41755	-3.45841	-3.51749	-3.07116	-3.26329	-2.75894	-3.60422	-1.27774	-1.82195	-2.54519	-3.71612	-3.30175	-1.98539	-2.73367	-1.92987	-3.55788	-3.18084	-3.37572	-1.82265	-2.44673	-2.30444	-3.13369	-1.50402	-3.43391	-3.18047	-2.04456	-3.22979	-1.29559	-1.6397	-2.58921	-3.26007	-3.4242	-2.05381	-1.14278	0.651986	0.00154742
PCDH17	no	no	-3.61086	-3.25913	-3.24217	-3.23491	-3.75693	-3.15575	-3.7707	-3.16891	-3.36857	-3.34933	-3.43701	-3.37013	-2.61096	-3.40842	-3.39097	-3.42203	-2.73633	-3.39208	-2.31076	-3.57336	-3.20512	-3.28194	-3.66545	-2.95049	-3.36375	-3.32367	-3.17229	-2.95465	-3.31102	-3.27711	-3.57239	-3.49708	-1.69723	-3.20789	0.255899	0.0292711
MYL12B;MYL12A	no	no	-1.44694	-1.15577	-1.77674	-1.14192	-0.922635	-0.637393	-0.57687	3.10047	1.8488	-0.0534247	0.276813	0.670782	0.802332	-1.32067	1.80673	2.677	-2.67154	2.16394	0.97061	0.469204	-1.48817	0.0491449	-1.7982	0.327227	1.31741	1.30932	-0.352707	-0.280508	-0.281117	0.803868	0.519321	1.81997	0.256719	1.84758	1.54914	5.83237e-05
PPP1R12A	no	no	-2.96583	-2.363	-3.11211	-3.12653	-3.23766	-1.80277	-3.06564	-1.80826	-1.77283	-2.80364	-1.60842	-1.59071	-3.18433	-3.03331	-2.15407	-2.03313	-3.07239	-0.442392	-3.43585	-3.2025	-2.9586	-2.76876	-2.82836	0.109749	-2.00963	-2.31853	-3.60564	-3.07532	-3.10457	-1.62697	-3.75153	-1.23848	-2.67483	-2.16182	0.59521	0.0593231
XPO1	no	no	-2.76503	-2.53112	-2.56833	-3.69388	-3.33323	-3.05637	-2.88663	-1.33163	-0.913018	-2.94022	-2.56902	-3.42659	-2.57629	-3.17156	0.344283	-2.15332	-2.97269	-3.54659	-2.97348	-3.01481	-2.82574	-2.88588	-3.34132	-3.13712	-2.52447	-3.38106	-2.19253	-2.93108	-2.64892	-3.49798	-1.09774	0.473677	-2.86499	-2.38447	0.257124	0.388053
PLXNB2	no	no	-3.27613	-3.56959	-2.87292	-2.57596	-3.05785	-3.08813	-3.0714	-2.71021	-1.77938	-1.56963	-2.7535	-2.46773	-2.39579	-1.31156	-2.93379	-2.48401	-3.11057	-2.94789	-1.94828	-3.11514	-1.94022	-2.30214	-2.29595	-1.05602	-3.46874	-1.91813	-2.91858	-2.92871	-1.64876	-2.95585	-2.81388	-2.76331	-1.6842	-2.43464	0.730534	0.000747763
SYNM	no	no	1.82897	0.944202	-0.808569	1.81411	1.27352	1.40976	-1.28865	2.12415	-0.511563	-0.574955	0.351869	0.384064	2.01744	0.756022	-0.316745	1.18854	2.63893	-0.9145	-0.546979	-0.295638	-0.135216	-0.356514	1.11042	-0.664969	-0.274342	0.349865	-0.102435	1.35074	2.45912	2.01182	1.40544	-1.17782	0.251172	1.67007	-0.342314	0.567586
PFAS	no	no	-3.66129	-3.49897	-3.1468	-3.15938	-4.15236	-3.58346	-3.41733	-2.3692	-2.64212	-2.17308	-1.48598	-1.81972	-3.9763	-3.72692	-3.72424	-3.79266	-3.71519	-2.45997	-2.16608	-3.47904	-3.53228	-3.62724	-3.52625	-4.86535	-3.44826	-1.74539	-3.73665	-2.94128	-3.60486	-3.872	-3.54365	-1.22112	-3.76272	-3.46205	0.560299	0.056376
ADAMTS3	no	no	-3.0931	-2.74237	-2.65153	-2.17646	-2.96983	-2.21111	-1.98222	-1.09801	-2.33859	-2.60583	-2.0576	-2.27325	-2.42102	-0.265208	-2.09891	-2.08065	-2.55996	-2.50292	-0.721567	-1.50371	-2.61365	-1.82268	-2.84875	1.10487	-2.05845	1.51535	-3.42821	1.37289	-2.40331	-2.14932	-1.9041	-1.81609	-2.10315	-2.42973	0.647564	0.0690329
FYB1	no	no	-3.74734	-3.89161	-3.72527	-3.94314	-4.23946	-3.58914	-3.92022	-4.0286	-3.63669	-3.8628	-3.59812	-3.05325	-3.85655	-3.83305	-3.19614	-3.99797	-3.92517	-3.46154	-3.93233	-4.21483	-3.95482	-3.92435	-4.11952	-1.59966	-4.09781	-3.40793	-3.77423	-3.96712	-3.77925	-3.96881	-3.86738	-2.31648	-2.82577	-3.9608	0.221681	0.21292
NPC1	no	no	-1.45147	-3.25825	-3.47828	-1.80443	-2.60677	-0.570864	-3.20739	-2.46972	-2.04056	-1.565	-3.19057	-1.73241	-0.037035	-1.69731	-3.36198	-3.54229	-0.509005	-3.12484	-1.00438	-2.63465	-1.07312	-1.71239	-1.53024	-1.01664	-3.44995	-2.49083	-3.56261	0.449525	-2.76998	-2.74735	-2.56445	-3.46516	0.0832079	-2.83274	0.189103	0.73598
ARPC1B	no	no	-3.27424	-2.78748	-3.12261	-3.40193	-2.8339	-4.31221	-3.23219	-0.0369164	0.386555	-0.684798	2.12993	1.10106	-2.2806	-3.54032	0.258019	1.16755	-2.77557	-0.772344	-0.721625	-1.39141	0.213203	-2.36912	-2.11306	1.39801	0.149151	-0.249304	-3.25738	-2.18832	-0.903908	-0.0646249	-1.42925	1.43556	-2.05839	-1.52119	2.22076	0.000436618
ARPC2	no	no	-1.69269	-1.99867	-2.23017	-2.03974	-2.01263	-2.20177	-2.46334	1.24799	0.8019	-0.320872	2.3969	1.65999	-1.47992	-3.59373	2.09622	2.2224	-2.48746	0.331815	0.417699	-2.62134	-1.86689	-1.66076	-1.11894	1.02173	1.04963	0.641926	-1.30932	-2.1703	0.29674	0.352483	-0.782343	3.20434	-1.57781	-1.4539	1.97525	4.76006e-05
ARPC3	no	no	-3.30364	-3.42719	-3.31511	-3.09644	-3.47675	-2.61764	-2.527	-0.0929732	-0.232597	-2.29663	0.303386	0.100838	-2.41535	-4.3757	-0.048599	-0.571892	-2.49726	0.358073	-0.0947829	-1.89058	-2.79954	-2.36055	-2.3806	-2.6332	-1.65668	-0.22011	-2.44191	-2.48014	-2.03141	-1.12978	-0.918381	0.902625	-2.54933	-1.05344	1.64729	6.32035e-05
PLSCR1	no	no	-1.77069	-3.21656	-2.53954	-2.5926	-3.12113	-2.24661	-1.99153	0.209867	-1.43013	-2.1187	-1.23102	-0.635042	-0.704865	-1.87843	-1.68562	-1.92396	0.244707	-1.00727	-1.71626	-2.5003	0.596334	-1.72233	-2.04462	1.09193	-2.25259	-1.65613	-1.91067	0.644012	-2.01125	-2.16588	-1.78123	-3.12848	0.148901	-0.472036	1.2971	0.000765287
EPHB6	no	no	-1.09601	-1.36676	-0.811414	-1.88009	-1.52091	-1.8896	-2.15296	0.603578	0.959867	1.11036	-2.0958	-1.31022	0.0531842	1.98112	2.31693	-0.212819	-1.07785	-0.79593	0.320422	-1.09659	-0.807024	-0.113129	0.0270295	-1.25389	-1.06246	-0.396044	0.66091	-0.499564	0.301764	-1.12181	-0.0262188	-1.13339	0.249794	-0.116681	1.25521	2.01652e-05
ADAMDEC1	no	no	-2.13843	-2.66223	-2.91827	-2.6329	-2.88585	-2.83394	-3.07706	-1.6285	-2.84276	-0.594738	-2.62728	-1.44486	-0.882929	-2.89339	-2.64423	-1.81248	-1.36882	-3.0957	-3.28519	-1.60703	-3.08521	-1.90319	-1.80674	-2.30399	-1.20333	-1.63092	-1.30522	-0.521005	-2.53843	-1.67654	-2.81618	-1.72017	-0.700399	-0.525578	0.905671	0.000289139
PFDN6	no	no	-4.15141	-4.43211	-4.30864	-4.70209	-4.14529	-4.25321	-4.35731	-1.88889	-1.90611	-4.45087	-1.28791	-2.239	-4.36371	-4.6592	-3.13646	-3.87034	-5.02368	-3.78304	-1.93308	-4.56484	-4.82579	-3.60495	-4.37319	-2.92249	-2.46624	-2.38555	-3.96238	-3.90866	-3.27439	-2.50825	-4.20129	-1.66985	-4.26593	-2.73884	1.07393	0.000258213
LAMA5	no	no	-3.04081	-2.97404	-2.97542	-1.73384	-2.59691	-2.19073	-1.92509	-0.54243	-0.00375285	-0.168277	-3.00846	-1.20135	1.14526	0.818254	-3.78525	-3.55186	-0.541206	-2.74446	-0.26471	0.700274	-0.48873	-0.74064	-0.415647	0.944116	-2.40509	-0.572069	-0.635928	0.540683	-1.58193	-2.61677	0.176935	-1.50006	-0.0576232	-0.685617	1.71286	4.81029e-05
ZNF185	no	no	-4.33265	-4.7171	-4.89686	-0.896355	-4.34088	1.03819	-5.46518	-3.49794	-2.43892	-3.17868	-4.01328	-3.99758	-4.86422	-2.07609	-4.20149	-5.02723	-5.0133	-4.66927	-4.53616	-4.9377	-5.43834	-3.07929	-4.9066	-5.67429	-5.49753	-4.91572	-3.93039	-3.52746	-3.91174	-4.958	-4.63198	-2.97377	-4.57043	-5.07932	-1.02117	0.356306
VGF	no	no	2.65069	4.10434	2.31699	4.07941	1.70085	4.45049	3.22804	4.4571	5.40657	4.10249	2.11523	3.09629	6.236	5.10067	-1.06	2.26871	4.90952	2.21107	3.75032	4.70209	4.34474	4.49715	4.59561	4.86167	1.7698	4.29107	5.40262	5.96271	3.29133	1.97812	4.67003	4.00192	4.80538	4.96842	0.734521	0.20892
SLC22A2	no	no	-2.59619	-2.42745	-2.46348	-2.96715	-2.5764	-2.69763	-2.70055	-2.6056	-2.07641	-2.66594	-2.57619	-2.77191	-1.75122	-2.51929	-2.77706	-2.69458	-2.35811	-2.57562	-2.93182	-2.45784	-2.79475	-2.79265	-2.73546	-2.58731	-2.89705	-2.49095	-2.39657	-2.62187	-2.76615	-2.67463	-0.875749	-2.48214	-1.73533	-2.50242	0.0238313	0.856061
TCAP	no	no	-3.94258	-4.34705	-1.7219	-4.07589	-4.26544	-4.17965	-1.12927	-4.36516	-4.22813	-4.34793	-4.36182	-4.80588	-4.30898	-3.69821	-3.94896	-3.86898	-4.42982	-4.33649	-3.59363	-4.14071	-3.35613	-4.87561	-4.6066	-3.20825	-4.52641	-4.45735	-4.05286	-4.39703	-4.27584	-4.87084	-2.90255	-4.50324	-4.14114	-4.56869	-0.73287	0.28863
PMM2	no	no	-3.05825	-3.2061	-3.69623	-3.1441	-3.34847	-3.52823	-3.49128	-0.437803	-1.57131	-3.54764	-1.67115	-3.47847	-2.88154	-3.23024	-3.67511	-2.70786	-3.31599	-3.06936	-2.37796	-3.4582	-3.94066	-4.33606	-1.0664	-3.41491	-3.34886	-2.49082	-2.92028	-3.2283	-3.20671	-4.22631	-0.50118	-1.82694	-3.65813	-3.81084	0.559852	0.0403941
HMGB3	no	no	-3.38044	-3.41197	-3.74175	-2.00524	-3.13417	-3.63414	-2.9715	-1.31976	-1.89056	-1.46881	1.89099	-0.0709442	-2.3052	-3.36901	-0.738892	-0.997072	-3.95702	-3.35289	-3.75382	-2.94454	-2.22521	-2.55837	-3.45782	2.30606	-1.4315	-0.812729	-3.10108	-3.28008	-3.73354	-3.33999	-3.78883	-1.86712	-0.824218	-0.525402	1.42564	0.000939616
SOX12	no	no	-0.748167	-0.811013	-3.29023	-1.4662	-2.75812	-2.11191	0.271607	-3.17383	-2.03362	-1.65727	-3.40944	-3.47853	0.125848	-3.17554	-3.64006	-1.30483	-3.70821	-3.73567	-3.78845	-3.38915	-4.4344	-4.04357	-0.39093	-3.88195	-4.32151	-4.02822	-3.53789	-2.97396	-3.46833	-3.40403	-2.18767	-4.13926	-1.63055	-2.98473	-1.31581	0.0903377
BCAT2	no	no	-3.34662	-3.50469	-3.68156	-3.93265	-4.0243	-3.5485	-3.68764	-0.758539	-0.789883	-2.79739	-4.08511	-1.98956	-3.72301	-3.64325	-2.28084	-4.54121	-3.9256	-4.42655	-2.37151	-3.8139	-4.08339	-3.92172	-3.84731	-1.54365	-4.31074	-2.82678	-3.4377	-3.82971	-3.8453	-4.34446	-3.28365	-4.12219	-2.5608	-3.41577	0.456426	0.123262
SIGLEC5	yes	no	-3.60038	-4.22031	-4.5875	-4.01347	-4.36397	-3.88192	-3.97715	-3.42908	-3.26953	-3.30485	-2.43435	-2.93932	-3.69016	-5.29018	-4.48245	-3.16218	-4.18803	-1.64031	-1.07595	-3.61751	-4.1349	-3.7275	-4.24841	-2.47428	-2.41551	-1.90815	-4.51961	-1.77789	-4.16094	-3.87928	-4.54354	-2.68571	-2.53118	-3.16553	0.972654	0.000891854
TMPRSS2	no	no	-1.34267	-1.25631	-2.7844	-2.30523	-2.31633	-1.35713	-2.30561	0.032607	-0.0965938	0.161113	-3.98227	-1.85548	0.488804	0.104371	-1.86791	-1.70514	0.97336	-2.15405	-1.11801	-2.02509	0.2772	-0.410645	0.973883	-0.174561	-1.00315	-2.14779	-0.846412	-1.30784	-1.10155	-2.02165	-1.75497	-1.26866	0.133674	-0.0476707	1.12642	0.00888298
NCAM2	no	no	-2.57875	-2.75324	-2.96841	-2.792	-2.7302	-2.79426	-2.92457	-1.16363	-0.246095	-1.8669	-2.28187	-2.19131	-1.11545	-0.797849	-1.3455	-2.72924	-2.52876	-0.765209	-0.389544	-0.996671	-1.18386	-0.961594	-2.74238	-2.55417	-4.05426	-1.22553	-1.14629	0.210276	-1.95319	-2.63401	-1.2067	-2.32452	-0.587097	-1.55616	1.36215	6.44999e-06
STX7	no	no	-3.42523	-3.9167	-3.08014	-3.14724	-3.758	-2.51794	-3.74213	-0.815891	-0.504357	-1.09045	-0.335401	0.185711	-1.48751	-1.91617	-0.79571	-0.673323	-3.19362	-0.338447	-1.64245	-2.53133	-3.80453	-2.20754	-2.79972	1.47987	-1.843	-1.10913	-3.67235	-1.90875	-3.23954	-1.58784	-2.90318	0.24883	-1.64218	-1.45006	1.88067	2.51144e-05
CCL25	no	no	-3.71605	-3.70305	-4.46716	-4.18906	-3.91014	-4.28475	-3.48246	-3.87949	-0.832086	-0.207829	-4.86946	-1.31651	-4.39325	-3.45862	-4.82627	-4.03047	-3.99151	-4.47085	-4.37742	-3.97779	-4.69889	-1.92786	-3.45977	-2.41592	-4.54832	-4.88545	-4.11239	-4.20658	-4.44892	-3.87699	-3.52317	-2.11189	-3.142	-2.67773	0.378605	0.40273
CAPN5	no	no	-2.70537	-2.65509	-2.9539	-2.33137	-2.39733	-1.75631	-3.00083	-1.53485	-2.50841	-2.45045	-2.94377	-2.72067	-1.15207	-2.60251	-2.91013	-3.21361	-1.07338	-2.74039	-2.06691	-3.13147	-2.11958	-2.80845	-2.05446	-0.803974	-2.29833	-2.31332	-1.50523	-1.09171	-2.04375	-1.83038	-1.60156	-3.1004	-2.29627	-2.0567	0.558461	0.0503224
ARPC5	yes	no	-1.1775	-0.459722	-0.912026	-0.807217	-0.366492	-0.282239	0.284583	1.69416	2.07639	1.35581	3.2761	1.93256	0.267542	-0.509576	2.60717	2.17672	-0.379947	0.449841	1.52752	0.907043	-1.15539	-1.00638	-0.551274	2.8131	1.26643	1.97943	-0.830634	-0.292327	0.854698	0.990795	-0.639929	3.49005	0.603209	1.74664	1.49405	4.91384e-05
FABP7	no	no	-6.08384	-5.48184	-6.07632	-6.47089	-5.67923	-4.91249	-6.10618	-6.36629	-3.97307	-6.31719	-5.29005	-6.72257	-5.95259	-5.91766	-5.42365	-5.76014	-6.15309	-5.86642	-2.2892	-5.98394	-5.75173	-5.35623	-5.358	-5.4628	-5.72493	-3.96729	-5.86982	-3.68727	-5.76292	-6.65844	-5.64784	-5.7134	-5.51253	-5.93553	0.0821259	0.762317
DHX15	no	no	-4.87545	-3.79925	-3.96039	-3.46213	-4.43264	-4.0751	-3.728	-2.27642	-3.34538	-3.73289	-3.48353	-3.93525	-4.04883	-4.47545	-1.98314	-1.61944	-3.93352	-3.71042	-2.9707	-3.87449	-4.25799	-3.75051	-4.29312	-0.131714	-3.28805	-3.76268	-4.52102	-4.03214	-3.43297	-4.33451	-3.6497	-1.97223	-4.5283	-3.88028	0.717413	0.0144692
FLRT2	no	no	-2.6611	-2.47728	-2.37017	-2.38521	-2.97939	-2.1363	-2.65495	-1.09217	-0.705577	-1.43407	-2.39926	-2.2172	-1.75175	0.388859	-2.40605	-1.96795	-1.53536	-1.56021	-1.26675	-2.53178	-1.666	-1.36701	-0.8492	-2.68797	-1.28301	-1.85231	-0.360557	-2.0922	-1.17748	-2.0137	-1.58579	-2.12755	-3.31593	-2.95892	0.801939	0.00045796
CYB5B	no	no	-3.93197	-3.75974	-3.40633	-3.87386	-3.79703	-2.92265	-3.52055	-2.49023	-3.22237	-3.43738	-3.73264	-3.86618	-3.81364	-2.55332	-3.4828	-3.64426	-3.8245	-3.56177	-1.96683	-3.55158	-1.77778	-2.91529	-3.7959	-2.96492	-3.86707	-3.73324	-3.67431	-2.39811	-3.78997	-4.03853	-3.17684	-3.72703	-2.57465	-2.56707	0.37895	0.0645993
PHGDH	no	no	-4.04727	-5.0015	-4.42045	-1.96347	-4.44107	-0.111441	-4.22644	-1.32468	-2.85698	-3.14131	-3.80507	-4.98611	-4.68461	-4.47886	-4.90936	-0.46667	-4.83739	-4.81573	-5.04425	-3.82609	-4.49603	-3.14145	-4.16048	-4.18072	-4.24737	-2.79929	-3.70761	-2.86016	-3.8269	-3.59554	-4.01672	-2.75565	-2.87299	-4.54578	-0.303941	0.731023
DYNC1LI2	no	no	-4.00086	-4.4005	-4.01482	-3.75474	-3.30827	-1.02982	-3.79471	-1.70206	-2.38336	-3.95831	-2.67936	-4.17236	-2.89457	-3.94251	-4.09824	-4.14615	-3.72694	-4.36632	-2.33648	-4.46121	-3.898	-3.3917	-4.30704	-2.45297	-3.81057	-3.4579	-3.87735	-2.081	-4.0393	-3.58248	-3.56997	-3.09488	-3.11321	-2.57589	0.022844	0.970675
KLK10	no	no	-4.27329	-4.25268	-5.22924	-1.93762	-4.60193	1.24768	-5.23476	-4.71488	-5.00261	-2.47842	-4.02831	-4.79257	-5.03536	0.592249	-3.83426	-4.90697	-6.13629	-5.43664	-3.42675	-4.74752	-4.48877	-2.5347	-5.68045	-3.83889	-3.95617	-5.0051	-4.8505	-4.7297	-4.68809	-2.51314	-5.15445	-4.95946	-4.00752	-5.06111	-1.10355	0.291567
PSMD3	yes	no	-3.22789	-3.33897	-3.50964	-3.35648	-3.68826	-3.42671	-3.74002	-2.16333	-2.60108	-2.77723	-2.88496	-3.30625	-3.4066	-3.56313	-1.97164	-1.81101	-3.102	-3.50833	-3.06977	-3.65403	-3.40259	-3.62931	-3.28953	-1.14726	-3.49091	-3.07464	-3.48	-3.84149	-3.36664	-3.9167	-3.50657	-1.86406	-3.35285	-3.60124	0.404227	0.0436492
SPINT1	no	no	1.29076	1.11747	1.16747	2.5656	0.769027	1.865	1.12655	3.42552	3.48006	3.0394	0.373544	1.02811	3.8181	3.6514	0.17796	1.55158	3.502	1.1216	2.78598	1.93022	2.20617	3.01646	3.17049	3.00991	1.50118	2.38787	3.4655	3.81902	1.88088	1.30676	1.64703	1.62079	3.58436	3.03518	0.978179	0.0110533
TREH	no	no	-3.94971	-3.55249	-3.85035	-3.75676	-4.32963	-3.72602	-3.45023	-3.34655	-3.33399	-2.46891	-3.41661	-2.91188	-2.77996	-2.342	-3.78879	-3.89828	-3.20871	-3.97291	-0.629513	-3.62211	-3.71217	-2.58424	-3.50305	-4.12244	-3.59066	-3.72362	-3.47099	-1.92577	-3.74726	-3.77457	-1.8732	-3.56528	-1.2271	-4.14821	0.699743	0.00158997
SPINT2	no	no	4.00528	4.28737	1.60024	4.53411	1.97236	4.67827	3.59973	2.62743	2.54199	2.76484	-0.622937	0.697258	3.51129	3.81814	-2.01364	-0.212787	4.86273	0.705275	2.66538	2.96347	3.84982	2.19683	2.91764	2.95504	-0.00294096	2.52997	2.95661	4.3138	1.27786	0.136387	2.20777	1.07255	3.17731	2.50869	-1.43624	0.0410363
TXNL1	no	no	-1.85368	-1.8276	-1.62627	-2.14494	-1.76537	-2.14142	-2.10088	-0.162662	-1.09474	-1.34747	-1.9671	-1.55409	-0.32031	-1.85647	-1.52943	-2.25959	-1.73819	-2.06291	-0.793264	-1.24821	-1.75632	-1.33666	-1.38091	-0.68537	-1.24755	-0.57536	-1.44738	-0.633952	-1.92299	-2.12295	-1.49155	-0.89108	-1.10015	-1.00097	0.688573	2.83558e-05
TPD52L2	no	no	-1.56695	-1.70974	-0.937228	-1.37543	-1.17988	-1.10842	-2.17624	1.01873	1.47015	0.271665	2.04666	-0.0878603	-0.0717648	-0.921704	-0.3477	0.126294	-1.25338	-0.555141	1.6976	-0.232163	-1.995	-0.23024	-2.42138	2.13864	-0.555526	0.484263	-0.895265	0.569479	-1.51494	-0.750513	0.497193	1.08879	1.01612	0.982835	1.24998	0.000240365
COCH	no	no	-1.93956	-1.63241	-2.21577	-1.15057	-1.26412	-0.974362	-0.910874	1.02725	3.35426	1.99918	-0.88368	-0.517045	2.37824	2.55241	-0.95169	-1.43856	-3.10408	-1.59386	2.31557	2.69179	-1.33728	2.22184	0.485664	2.59158	-1.37682	2.34871	2.77902	3.54766	0.0436295	-1.48516	2.93339	1.58114	1.64182	1.74814	2.00536	0.000125636
MGAM	yes	no	2.08628	2.20029	1.598	0.239861	2.21083	5.60072	1.25214	4.32476	3.95067	4.35538	1.31184	4.27736	3.14006	4.9229	2.85635	2.34314	5.12772	3.37494	5.35679	3.73544	6.25795	2.5784	4.10369	5.25541	2.1842	2.803	3.15946	5.2325	2.37722	3.38949	3.35355	2.59419	5.85884	4.97197	1.91362	0.0387738
AKR7A2	no	no	-3.02147	-3.10723	-2.71598	-2.42879	-2.85246	-2.70893	-3.52087	-2.0923	-0.0875925	-1.51303	-0.407132	-0.299223	-2.65942	-2.93549	-0.425249	-1.19733	-2.8734	-2.103	-1.49152	-2.86476	-2.5903	-2.68377	-1.86802	-0.995386	-1.76171	-0.366781	-2.75527	-3.06471	-2.14159	-1.75437	-1.78986	-0.28027	-1.69577	-2.64391	0.892419	0.000916812
PROM1	no	no	-1.56829	-1.41553	-1.7621	-1.29934	-1.99739	-1.88834	-2.18375	0.126418	0.0188689	-0.178662	-2.43372	0.17347	1.45578	0.761126	-1.50212	-1.33084	1.84374	-0.634074	-0.208367	-1.09076	0.24249	0.138643	0.886997	0.667188	-1.21304	-0.345282	-0.479287	1.95549	-0.188346	-0.793132	0.131163	-1.08138	0.78572	-0.677784	1.49228	7.04552e-05
EPB41L2	no	no	-0.0685348	-0.0340206	-1.75257	-0.00355155	-2.36152	-0.424784	-2.37654	-1.18747	-0.556386	-1.60971	-4.59322	-2.7052	-1.47115	-0.489123	-2.91542	-2.73428	-0.527258	-2.45858	0.604739	0.383344	-1.99151	-2.25195	-3.59993	0.363843	-2.82173	-0.0399537	-1.41201	1.56235	-1.88352	-2.37201	0.180854	-0.447603	-0.844923	-1.00397	-0.239783	0.700756
TGOLN2	no	no	-2.44155	-1.16403	-3.22453	-0.856867	-3.99514	-1.46941	-1.95681	-3.19125	-1.28596	-1.68917	-3.61038	-3.04728	-1.02308	-0.782055	-4.92698	-3.25488	1.05336	-3.05864	-2.72483	-2.62809	-1.74939	-2.65565	-1.56482	-0.77765	-2.45921	-2.25301	-1.69808	-0.210025	-3.17901	-3.61539	-2.71237	-2.79636	-1.31063	-2.8649	-0.169257	0.755709
LAMTOR5	no	no	-3.53495	-3.27247	-3.22564	-3.06202	-2.724	-3.08343	-2.91597	0.567568	-0.497398	-1.86081	-2.57326	-1.88134	-2.28054	-2.06669	-2.88504	0.0467573	-4.16159	-0.631301	0.516432	-1.32621	-3.32788	-2.00599	-2.20838	-2.68496	-1.17899	0.540772	-3.28174	-0.162417	-2.42479	-1.00129	-2.61194	-0.050657	-0.215697	0.00584468	1.75526	5.97821e-05
B4GAT1	no	no	-1.09238	-1.14276	-0.923679	-1.49339	-1.22181	-1.06058	-1.43781	0.0873919	1.59515	1.29759	-1.79469	0.341063	-1.0843	2.69854	-1.52351	0.324412	-1.50889	-1.59031	0.981871	-1.86311	-0.377222	-0.469956	0.437401	-0.066035	-0.39577	0.215098	-0.00862822	-1.08681	-0.28489	-0.768231	0.187614	-0.666788	0.182389	-1.37826	1.06399	0.000158899
TNFSF12	no	no	-3.73242	-4.01532	-4.13083	-3.8566	-3.84779	-3.93703	-4.19307	-3.73212	-2.40123	-2.31829	-3.80995	-3.42347	-4.00182	-1.9799	-4.03076	-4.45467	-4.14896	-4.12124	-1.53801	-4.29895	-3.92989	-1.71766	-3.77568	-4.1921	-4.13936	-3.01413	-3.90197	-0.720326	-3.80646	-2.99423	-3.6945	-4.21405	-2.24023	-3.69878	0.740561	0.0165566
SLC26A4	no	no	-4.65682	-4.68647	-4.80549	-4.16868	-4.84634	-1.94861	-3.97547	-2.66061	-5.32252	-4.4572	-4.22119	-4.3522	-3.70856	-4.71705	-3.72393	-4.26844	-2.69278	-3.8381	-2.33744	-4.39249	-2.85865	-4.53182	-1.34811	-4.6062	-5.14018	-3.6051	-4.70385	-3.63355	-4.081	-4.23882	-4.07895	-4.00915	-2.6519	-5.14406	-0.0420063	0.932891
WIPF1	no	no	-4.36549	-2.9913	-2.96856	-3.37173	-3.52881	-3.38769	-3.70781	-2.50398	-2.491	-3.54389	1.7755	-0.532351	-2.15314	-2.63017	-1.41559	-2.93117	-3.24496	-0.477005	-0.956996	-2.28287	-3.12915	-3.00086	-3.62045	1.3683	-3.44462	-2.56973	-3.86116	-0.54411	-3.55474	-2.82266	-2.22454	-1.39669	-2.67384	-1.81695	1.07835	0.00484233
SGCE	no	no	-2.87661	-2.18392	-2.30346	-2.78419	-2.16906	-2.93143	-2.42585	-3.40966	0.0402714	-2.84854	-2.10025	-2.46726	-2.12532	-1.7567	-2.20463	-2.39225	-2.75185	-2.65047	-0.50088	-1.3269	-3.14092	-2.17395	-2.47531	-0.0730156	-2.43402	-1.43488	-1.70378	-0.457931	-2.37785	-2.64274	-0.383585	-1.38564	-2.32747	-2.01366	0.397759	0.13485
RNF13	no	no	0.911836	-0.609608	-1.68909	0.76137	-2.11932	1.02546	-0.9629	-1.37402	0.0600705	-0.0876005	-2.94496	-1.79222	1.12834	0.477162	-3.09515	-2.35329	0.845879	-1.95885	1.2385	-1.63602	1.08185	-0.159157	-0.369258	-0.988469	-1.81895	-1.21109	-1.59572	1.09992	-1.70696	-2.1261	0.130959	-1.9601	1.42306	-0.82949	-0.376885	0.580374
CA12	no	no	-4.11593	-3.43226	-3.87716	-3.99634	-4.31088	-4.12405	-4.06479	-2.61284	-1.06243	-2.5465	-4.10681	-3.52427	-3.6803	-2.47483	-3.63862	-4.42896	-4.31697	-4.46437	-2.17367	-3.83367	-4.07663	-2.87182	-3.64632	-2.90946	-2.14283	-2.4962	-2.1949	-2.0945	-3.33738	-4.23993	-2.11119	-2.6833	-2.04134	-4.22498	0.830543	0.00102053
DENR	no	no	-3.65545	-3.8031	-3.64848	-3.75865	-4.26828	-3.90883	-3.75224	-2.41089	-2.8311	-2.0687	-2.16447	-3.51478	-3.30862	-4.08245	-2.86165	-2.91954	-4.08563	-3.26233	-3.40091	-4.23151	-3.97206	-4.30754	-3.81204	-2.4738	-1.62517	-2.49529	-4.11647	-4.11445	-3.70757	-3.77474	-4.82946	-2.34521	-2.35954	-1.89287	0.552705	0.0161486
PSTPIP1	no	no	-1.14917	-1.32052	-1.4245	-1.76197	-1.21062	1.83914	-1.92686	1.96838	-0.231807	-1.25276	-1.59096	-1.41012	1.44933	1.27181	-1.89979	-0.931902	-0.0778352	-0.225739	1.40132	0.906072	1.15912	-1.36004	0.498235	1.22403	-1.47903	1.61331	0.434552	2.40161	-0.881309	-1.11721	1.11556	1.39854	0.547936	0.966665	1.33288	0.0613272
DNPH1	no	no	-4.02831	-3.68312	-3.39004	-4.10844	-4.06572	-3.51241	-4.00727	-3.75776	-1.0126	-0.974635	-3.78993	-3.58578	-3.60339	-1.58869	-3.54578	-2.89118	-4.12717	-4.14491	-3.94054	-4.01302	-3.82706	-3.03837	-2.75703	-3.57561	-2.18518	-1.42083	-3.26936	-2.59531	-3.98127	-3.63572	-1.98134	-3.11133	-1.90236	-3.97335	0.789297	0.00608329
CHMP2A	no	no	-2.78346	-2.03711	-3.29338	-2.10966	-3.0293	-1.85642	-2.40068	-0.758552	-1.55916	-0.471806	-3.20707	-2.42911	-0.024758	-0.75474	-0.529363	-3.31826	-2.87493	-3.02768	-1.38833	-1.44535	-0.32323	-2.02489	-0.180298	0.440461	-1.98529	-0.457379	-2.15709	-0.488861	-2.19374	-2.16683	-1.89792	-3.83763	-1.19375	-0.482881	1.08508	0.00262149
PSCA	no	no	2.6721	1.88428	0.000471237	6.03591	0.383769	0.902102	1.44589	-0.0074929	2.64605	2.51278	1.35455	0.498171	0.654207	0.0700918	1.07573	1.31758	3.2711	0.432299	0.419033	1.05507	-0.312314	1.9809	1.99603	0.473773	1.68693	0.141314	3.32328	4.16052	1.27013	0.70058	2.26755	1.17953	3.94167	2.81439	-0.29059	0.7856
GET3	no	no	-2.40433	-2.92742	-2.73432	-3.29059	-2.49815	-2.83054	-3.26105	-0.525493	-0.0293802	-1.41481	-0.23757	-2.85948	-3.07444	-3.55201	-0.69047	-1.0598	-2.61189	-2.4087	-0.842128	-3.49358	-2.48714	-2.85321	-2.20836	-3.17254	-1.55392	0.0140429	-3.44206	-2.78854	-1.54402	-1.46995	-2.77935	0.656865	-1.73403	-1.93066	1.14024	0.00123901
PI15	no	no	4.77197	5.74369	0.822472	5.26959	3.56465	5.91672	2.57043	4.14083	2.07573	2.2154	0.525296	2.32713	4.58368	3.86151	-0.179932	1.20531	7.13376	0.55231	3.10312	2.31582	5.20091	2.50438	2.25297	2.06923	1.70177	2.59144	3.19045	4.78241	2.18117	0.480246	1.07185	2.21999	1.69733	1.64849	-1.59597	0.102015
ACTN4	no	no	-1.21038	-0.567743	-1.00692	-1.11576	-1.48605	0.821362	-0.475303	2.61186	3.26101	1.60423	3.26395	3.52727	-0.1594	0.512847	3.20877	2.40024	-1.93829	1.93813	1.87013	-1.18599	-0.0931615	-0.179356	-0.614349	1.29212	1.32962	2.01288	0.266233	-0.104265	0.583668	1.61233	1.05526	4.47609	-0.995905	-1.41049	2.12767	0.000570955
AP1G1	no	no	-3.97235	-3.85288	-3.66396	-4.01788	-4.36845	-3.76178	-3.6099	-2.55162	-2.51335	-3.66883	-4.37053	-2.59945	-2.24369	-3.57325	-1.23283	-2.71008	-3.81432	-4.49724	-4.03706	-3.76618	-3.78399	-2.69403	-3.85944	-4.31069	-3.96683	-3.26814	-3.73793	-4.29964	-3.88571	-3.74946	-4.45718	0.0637353	-3.62352	-4.24782	0.265255	0.366975
ENSA	no	no	-3.4795	-3.2892	-3.06737	-0.846153	-3.30716	-0.631321	-3.27961	-1.22662	-1.57494	-1.84026	-1.184	-3.32126	-1.76066	-1.71061	-2.86782	-2.97876	-3.54122	-2.83704	-1.92251	-2.57146	-3.50433	-2.78342	-1.88678	-0.441057	-1.82778	-2.13427	-2.62213	-0.587405	-3.13939	-4.44129	-2.81619	-2.76924	-1.77209	-1.74891	0.147479	0.825286
NARS1	no	no	-3.90927	-3.68384	-3.86368	-3.6758	-4.20255	-3.75087	-3.38569	-1.38569	-1.08185	-3.32758	-2.44707	-2.10144	-2.62992	-3.89849	-1.45027	-2.53758	-3.74439	-4.10229	-3.67822	-3.60212	-4.33514	-3.67976	-3.94642	-3.46587	-2.64139	-2.93985	-3.65134	-3.97927	-3.29397	-2.25819	-4.27563	-1.34677	-2.94425	-3.49467	0.79912	0.000549601
KRT86;KRT81	no	no	-5.64218	-5.32685	-5.03343	-5.38923	-5.28352	-5.60311	-1.0127	-1.70194	-5.26717	-5.43318	-5.35767	-4.22084	-4.60206	-4.76155	-4.81643	-4.24235	-5.01179	-4.74343	-4.8179	-5.06299	-5.84001	-4.24229	-4.50167	-4.83549	-5.67266	-2.23318	-5.99345	-4.33101	-4.89476	-4.47048	-5.12522	-3.52552	-5.7909	-4.57822	-0.301454	0.698539
NUDT21	no	no	-4.10188	-3.59861	-3.96932	-3.70418	-3.67921	-3.29352	-3.73626	-1.77109	-1.97493	-2.17148	-1.34068	0.0740399	-3.24159	-4.26398	-0.715785	-1.53637	-3.88292	-3.90611	-0.732923	-3.25879	-3.85213	-3.90411	-3.90983	-1.36822	-1.73063	-1.34475	-4.10245	-3.24075	-3.3092	-2.49449	-3.20934	0.0887374	-3.85381	-3.58	0.840854	0.00620658
CALU	no	no	-1.82547	-2.18504	-1.92183	-1.09188	-2.10993	-1.81586	-1.77357	0.473158	0.0229832	-1.5492	-1.83735	-1.59593	-0.352917	-0.666234	-2.35842	-1.96464	-1.31001	-1.8513	-1.07521	-2.10764	-1.01074	-0.211399	-0.911581	-0.888239	-1.36131	-1.04612	-0.0046783	-0.478546	-0.711235	-1.42933	-1.11609	-1.8307	0.413071	-1.51193	0.799977	0.00162792
EDIL3	no	no	-1.87629	-1.28554	-2.523	-2.96099	-2.52404	-0.407519	-2.72103	-1.60875	-1.21868	-1.52132	-2.67919	-2.57932	-2.99498	-0.196696	-2.57774	-2.2684	-0.582422	-2.80793	-2.35961	-1.56193	-2.36557	-2.82204	-2.32892	-2.39824	-2.50242	-1.169	-2.34035	-1.36063	-2.95148	-2.33804	-2.54362	-2.56358	-2.45016	-2.40926	-0.227063	0.584579
CD5L	no	no	1.55557	1.79725	0.340143	0.244314	1.18549	0.780402	1.3563	2.95478	2.34136	4.62181	5.17593	3.38616	2.20903	2.88576	5.12185	4.98172	0.628163	0.228001	0.883531	4.54622	-1.35616	4.78095	6.00729	3.16016	5.65521	3.10436	1.1615	0.23666	4.4584	5.42941	2.98751	4.51975	2.44037	4.5762	2.4113	2.83558e-05
XPNPEP2	no	no	-1.41215	-1.19109	-2.14026	-0.867022	-1.90742	-1.83313	-2.07294	-1.30511	-1.32084	0.531052	-1.55997	0.211209	-0.402854	-1.01289	-1.8519	-0.636136	-0.0298612	-2.19776	-1.16395	-2.61406	-1.29897	-0.81186	-0.328188	-1.23627	-0.718489	-1.62355	-2.17914	-0.600907	-0.576102	-0.644318	-1.55305	-1.961	-0.328763	-1.47083	0.516618	0.060597
AKR1B10	no	no	-3.88652	-5.69167	-5.01549	-5.0452	-4.80371	-3.92058	-4.59225	-3.20234	-0.601066	-4.32888	-4.09926	-2.68144	-4.86115	-4.20397	0.677887	-4.76363	-5.05523	-4.57733	-3.01079	-4.64243	-4.56715	-3.6653	-1.87144	-4.64867	-5.33016	-2.13809	-4.45522	-3.82519	-5.93399	-4.36714	-4.78676	-1.5373	-4.25184	-3.91408	0.856568	0.0154613
GMFG	yes	no	-1.01338	-0.904926	-1.3097	-1.61839	-1.37464	-1.28174	-1.96445	1.35898	2.11375	0.668248	2.02506	1.58061	-1.21649	-1.60231	1.03363	0.882131	-1.05842	2.63914	2.03918	-0.0933548	-2.46753	-0.644993	-2.79382	0.516322	0.21702	1.90491	-1.72128	1.68154	-0.070867	-0.657032	0.930677	2.54745	0.806981	0.691634	1.98988	1.27222e-05
TMPRSS11D	no	no	-3.25774	-3.9712	-2.64138	-1.89279	-3.66435	-0.192671	-3.33166	-3.68039	-0.223562	-2.6571	-2.30487	-2.35846	-2.56455	1.63156	-2.99455	-3.97444	-1.68079	-3.18008	-2.24256	-3.55599	-2.25111	-1.27477	-4.09527	-3.31048	-2.77342	-3.50832	-2.33569	-3.53955	-2.98686	0.0846053	-3.61727	-2.96018	-3.0309	-2.92504	-0.00462124	0.995492
PLIN1	no	no	-4.41949	-4.25224	-4.38884	-4.82754	-4.66568	-4.69426	-4.56404	-4.49	-5.15618	-4.62581	-4.79826	-4.49923	-4.33675	-3.13257	-4.84523	-4.64756	-4.3585	-4.43165	-3.77499	-4.24176	-4.31567	-4.4852	-4.37924	-3.37027	-4.14514	-4.60054	-4.68416	-4.68763	-4.61018	-4.46886	-4.23473	-4.14527	-2.92569	-4.26799	0.209425	0.135436
ADGRB2	no	no	-3.08862	-3.64353	-4.13054	-3.53921	-4.28693	-1.37542	-3.54544	-1.84478	-1.00461	-3.37266	-4.13279	-3.16601	-1.32408	-1.49746	-3.32744	-4.58216	-4.68846	-3.81824	-2.25251	-3.49759	-1.30756	-3.85614	-3.35558	-3.34678	-4.03615	0.406137	-1.29752	-2.64432	-4.10545	-3.65644	-1.77972	-3.44588	-3.43522	-0.0570406	0.701248	0.172366
GNG7	no	no	-5.35461	-4.56231	-4.81055	-4.61956	-4.87516	-4.74905	-4.87514	-4.42511	-4.62923	-5.3144	-4.87853	-3.68796	-1.84911	-5.08172	-5.33293	-5.10816	-4.53939	-4.99665	-3.60106	-4.84057	-2.94316	-4.9215	-2.65517	-4.86079	-5.21411	-4.61208	-4.86378	-4.39628	-5.17018	-4.97254	-5.0788	-4.8486	-5.12275	-5.2889	0.633911	0.0232476
SUSD5	no	no	-1.58293	-1.71619	-1.76577	-0.113123	-1.53757	-0.369717	-1.33482	-0.137864	1.32799	-0.799518	-1.79764	-2.37082	0.534006	0.170293	-1.73526	-1.50861	0.631797	-1.7958	1.03088	2.0567	1.07738	0.655757	-1.20658	1.36191	-0.921281	-0.849675	0.0613559	0.694006	-1.29157	-2.53206	2.59195	-1.00775	0.177653	-0.608528	1.01802	0.0373094
URB1	no	no	-1.09771	-1.90134	-1.89123	-1.36757	-1.50021	-0.329548	-0.972307	-0.710143	0.4533	0.475148	-1.67033	-1.84694	-0.353147	2.35524	0.566843	-0.0535049	-1.17301	-1.65472	-1.12192	-0.438886	-1.76141	-1.39866	-0.65396	-2.11627	-0.88259	-1.84706	-0.856659	-1.28521	0.0129421	-1.61957	-0.954942	-0.760642	-0.559799	0.23083	0.578775	0.0753343
FZD6	no	no	-2.98897	-3.771	-3.77157	-3.69316	-3.14582	-3.10812	-3.41269	-3.14794	-2.33475	-3.31297	-3.3047	-3.54123	-3.59195	-2.93322	-3.79743	-3.22534	-3.65754	-3.50683	-0.854776	-3.40674	-3.23627	-2.88416	-3.08407	-2.28399	-3.59126	-1.0889	-3.57923	-2.41663	-3.37038	-3.42185	-2.74658	-3.7717	-2.22724	-3.41911	0.197481	0.272042
PPL	no	no	-2.89972	-3.58613	-3.01824	0.12558	-3.02751	0.236801	-2.39691	-1.38696	-0.74377	-1.76554	-2.96241	-3.67768	-1.91854	-1.38676	-3.22308	-2.94951	-1.92656	-2.83246	-2.76367	-3.17506	-2.88254	-0.301441	-2.8815	-1.25651	-3.41969	-3.5395	-1.33914	-2.55636	-2.9592	-1.11324	-2.98928	-2.8317	-3.03078	-3.05858	-0.0793008	0.929631
NRP2	no	no	-3.80136	-4.07027	-4.17199	-4.30416	-4.28102	-4.12663	-3.93865	-3.10924	-2.23736	-2.78962	-4.30021	-3.5782	-3.00765	-2.38285	-5.11476	-3.25348	-3.42679	-4.42333	-3.09466	-1.9218	-3.0902	-2.02063	-2.90227	-2.18428	-3.8544	-2.31525	-4.22714	-2.72803	-3.40369	-3.34339	-2.14585	-2.36105	-3.72522	-4.45868	0.86878	0.000214556
CUBN	no	no	0.0259848	0.383641	0.211282	-0.00641888	-0.5686	-1.24745	-0.128904	4.0908	4.13217	3.45335	0.168549	3.46615	3.95318	4.12439	0.276467	3.16302	1.84956	1.96845	3.82755	3.12603	3.62193	3.0353	4.59506	2.39128	3.01934	2.15472	2.82956	4.71178	3.49231	1.7569	3.63834	2.34662	4.72548	3.41029	2.96379	2.5589e-05
SYNCRIP	no	no	-4.35847	-4.06468	-3.81288	-3.85604	-4.10701	-4.70471	-4.26687	-1.29141	-1.56632	-2.71544	-1.04017	-2.92368	-4.47711	-3.74938	-1.1616	-2.40445	-4.22761	-2.60271	-2.51112	-2.79157	-4.6283	-4.71757	-4.52627	-3.66014	-2.68512	-2.40193	-4.40318	-4.48603	-3.78874	-2.6458	-1.33069	-1.07767	-3.3104	-3.06605	1.27136	0.000131511
TPST1	no	no	-3.6959	-3.18958	-3.36788	-3.17352	-3.59241	-3.18778	-2.97418	-1.33669	-4.37514	-1.7088	-3.61651	-2.97361	-1.19463	-1.83458	-3.28229	-3.44488	-3.1382	-3.49758	-1.62495	-2.6253	-1.92625	-1.54158	-2.52028	-0.373812	-3.39515	-2.37544	-3.4844	-0.430355	-3.22745	-3.07177	-1.63276	-2.45763	-1.9109	-2.11051	0.969572	0.000214945
B4GALT4	no	no	-5.55335	-5.3578	-5.46841	-5.88368	-5.20835	-5.46687	-5.53511	-6.04589	-5.48301	-6.33479	-5.85483	-5.85915	-5.54113	-5.24474	-4.08184	-4.89692	-5.19814	-5.41768	-5.61932	-5.70574	-5.55602	-5.24553	-5.02301	-2.35753	-5.66983	-5.71747	-5.80984	-5.75729	-5.01102	-6.02574	-5.24542	-5.56251	-5.63779	-5.61965	0.181046	0.490103
GMDS	no	no	-3.53885	-3.60808	-3.6241	-4.31062	-3.59203	-3.38174	-3.79078	-1.71535	-1.65318	-3.44428	-2.98252	-3.36274	-4.008	-3.50655	-1.32588	-2.65714	-3.68179	-2.99511	-3.57414	-3.48144	-3.59981	-3.42678	-3.36174	-2.48023	-2.9642	-2.95525	-3.75232	-3.27904	-3.24414	-3.89764	-3.74563	-1.79125	-3.83008	-3.90687	0.581988	0.00205388
TLR2	yes	yes	-2.66698	-2.807	-3.343	-3.04146	-3.17274	-2.9846	-3.06397	-1.70582	-1.47668	-2.80859	-2.56221	-1.88723	-1.55874	-1.23244	-2.93538	-3.16968	-2.7352	-3.07772	-1.11668	-2.48475	-1.96746	-1.63336	-1.92454	-1.4728	-2.70171	-0.861736	-1.69593	-0.298266	-2.52073	-2.38056	-2.382	-2.40474	-1.48236	-3.4045	0.696166	0.000251036
GFRA3	no	no	-2.35464	-1.41869	-2.02644	-0.225074	-2.40524	-0.994166	-2.80725	-2.21562	-2.85614	-1.31929	-2.4749	-2.28316	-0.525534	-1.38559	-2.65079	-2.96689	-0.583388	-2.70308	-1.52093	-1.56253	-1.43033	-2.47705	-1.84584	-0.826531	-2.95673	-3.05191	-2.34869	0.249457	-2.37221	-2.26434	-0.690071	-1.94874	-2.98145	-1.36282	0.0821449	0.891871
DIAPH1	yes	no	-3.20709	-2.92027	-3.20415	-3.05077	-3.00287	-3.3661	-3.07906	-2.59498	-2.53378	-3.20992	-2.14526	-3.29815	-3.57163	-2.875	-1.95322	-3.15915	-3.16577	-3.27855	-3.17757	-2.06146	-3.0696	-2.93799	-3.30097	-1.18947	-2.80994	-3.37109	-3.15202	-2.48703	-3.04329	-2.86672	-3.23174	-1.8627	-3.28828	-2.22687	0.330998	0.0392046
SELENOF	no	no	-3.63194	-3.74044	-3.48862	-3.8893	-3.61404	-3.70935	-3.89571	-2.12704	-2.34918	-4.21991	-3.6353	-3.65781	-3.58144	-3.29982	-3.57552	-3.76014	-3.82264	-3.2547	-2.78385	-4.3876	-3.43933	-2.7659	-2.2224	-1.45051	-3.74624	-3.11055	-2.16082	-2.17001	-2.83527	-3.812	-2.39496	-3.7059	-3.48697	-3.67709	0.616837	0.0025218
TSPAN1	no	no	-1.69972	-1.64235	-1.40491	2.14738	-1.88165	2.75773	2.2905	4.20588	3.62533	3.74092	0.144555	3.65726	4.4003	3.84473	2.16562	2.77666	4.83552	3.13408	4.4863	1.32543	4.69904	3.54436	4.39506	4.75498	2.06261	3.23348	1.85641	5.47105	3.33325	2.9412	3.74522	2.45422	5.29674	3.26642	3.37814	0.0103292
PLIN3	no	no	-1.82883	-2.08912	-1.51873	-2.02465	-2.2567	-0.479184	-1.88576	0.502546	0.670967	-0.425515	2.22814	0.124749	-1.71819	-1.98135	0.478753	0.591865	-1.60343	0.259799	1.00115	-0.213505	-1.24209	-1.38238	-1.1672	1.94765	-0.175483	0.666075	-2.2457	-0.395197	-1.20137	-0.404522	-1.18816	1.31128	0.430249	-0.350697	1.50921	0.000520694
UGDH	no	no	-3.49812	-3.67068	-2.95609	-3.85175	-3.87001	-3.14322	-3.83492	-2.56107	-1.23182	-1.42523	-3.306	-1.95152	-3.64007	-2.68977	-2.58743	-3.69617	-3.61148	-4.27089	-1.86487	-3.60214	-3.06922	-3.55655	-2.35635	-3.44123	-2.9677	-2.13619	-3.64523	-1.45361	-3.62316	-3.38232	-3.52523	-1.77293	-2.40883	-3.21002	0.716911	0.000823465
CTNND1	no	no	-4.33916	-5.48977	-6.35192	-1.5272	-5.38115	-0.876397	-5.81417	-3.3036	-5.44222	-6.64626	-5.38189	-6.01245	-5.68053	-5.5531	-6.11198	-5.95044	-5.27511	-6.55952	-5.98321	-4.56764	-5.04439	-5.67713	-5.3085	-4.34786	-4.21454	-5.31119	-6.58699	-4.38433	-5.50133	-5.94601	-6.10205	-5.55916	-5.50679	-5.06553	-0.928965	0.384554
EIF1B;EIF1	no	no	-3.22601	-3.54462	-2.61048	-3.44985	-2.83541	-3.20041	-2.9036	-0.642024	-0.523877	-0.668296	0.416217	-1.43919	-1.91256	-3.80275	-1.8415	-1.20312	-3.06443	-3.39622	-1.3078	-3.30279	-1.9748	-2.30687	-3.64166	-1.49514	-0.990293	-1.15309	-3.56309	-2.84007	-1.77083	-1.90909	-3.34134	-1.29888	-2.03137	-1.05711	1.29405	3.39465e-05
SNX2	no	no	-3.32868	-4.06338	-3.72905	-4.15093	-4.03854	-3.70751	-3.3153	-1.68331	-1.6042	-3.75104	-1.95099	-2.03138	-3.75886	-3.94771	-1.43926	-2.23415	-4.29117	-3.52648	-3.21777	-3.9869	-4.07335	-3.54643	-3.82087	-3.85335	-3.0717	-2.84516	-4.2695	-3.88085	-2.87759	-3.82906	-5.05098	-1.09658	-2.74383	-4.07389	0.630595	0.018698
USO1	no	no	-4.14758	-4.81525	-4.04839	-3.89772	-4.39466	-3.8416	-4.52808	-3.32842	-3.12724	-4.66812	-4.59939	-4.73167	-4.69826	-4.4382	-1.46266	-4.46388	-4.7252	-4.77385	-4.22878	-4.21186	-4.21737	-4.32896	-4.32818	-4.18824	-4.21233	-4.33958	-4.5046	-2.53996	-4.12935	-4.21437	-3.90979	-1.27612	-3.88563	-4.07171	0.530342	0.097235
H2BC12;H2BC12L;H2BC5;H2BC4;H2BC18;H2BC9;H2BC15;H2BC14;H2BC13	no	no	0.792057	0.316505	0.177509	0.78034	0.41408	2.27934	0.160575	3.79586	5.41744	2.28313	2.55148	6.55813	0.697936	1.07149	6.10642	5.45703	0.434465	-0.225912	1.4509	2.51631	4.94562	1.68254	1.17361	4.98901	3.2427	5.26849	2.19964	1.07876	1.78069	3.68861	2.85575	6.91173	1.2618	1.03874	2.3905	0.000388184	H2BC14	H2BC13
EIF5B	no	no	-5.7362	-6.10793	-5.88632	-6.09384	-5.78327	-6.0163	-5.89157	-5.64075	-6.10476	-5.81618	-5.0732	-3.97434	-5.73151	-6.02552	-6.02056	-5.63116	-5.73263	-6.1253	-5.35572	-6.00768	-6.33122	-5.62961	-5.90194	-4.74723	-5.94608	-5.88321	-6.59832	-5.63611	-6.03127	-5.53143	-5.8117	-6.32034	-6.24601	-6.12017	0.148614	0.329777
ZG16	no	no	-7.42785	-6.11059	-5.34521	-7.10772	-5.50988	-3.26841	-7.18539	-8.01691	-5.19115	-3.424	-5.61036	-4.48634	-2.8018	-0.519024	2.93979	-2.81269	-5.67357	-5.9496	-4.2381	-6.3891	-5.95206	-6.1616	-5.68432	-4.83883	-5.278	-5.83949	-3.70479	-6.79589	-6.17692	-8.21165	-5.16295	-6.2622	-7.9641	-4.96188	0.37979	0.730815
EDF1	no	no	-3.87733	-3.97536	-3.73258	-3.47489	-3.45825	-1.97477	-4.03845	-1.77426	-2.4721	-1.09845	0.242506	-1.29969	-4.27743	-3.76318	-2.1866	-3.15431	-3.95571	-3.45404	-2.84128	-2.99411	-3.49785	-3.11352	-4.30093	1.05709	-2.92892	-2.04339	-3.61092	-3.60849	-4.63951	-3.45248	-3.12467	-1.57256	-3.27374	-2.22544	0.599559	0.135589
GPR37L1	no	no	-0.704889	2.30367	-1.53427	1.23677	-0.681473	1.72399	0.542361	1.19743	2.24593	0.171355	-1.92227	-1.57676	2.05804	1.48016	-1.76295	-1.66832	2.67318	-1.40407	0.390608	2.04324	0.926096	0.298853	0.568888	1.24106	-2.01101	0.819117	2.49349	2.85596	-1.24007	-2.43797	1.27905	1.28637	1.43431	0.785083	0.0906851	0.912162
DNAJA2	no	no	-3.57573	-3.7861	-2.66813	-2.39552	-3.72108	-2.40932	-3.10803	-1.5548	0.303531	-3.81762	-3.28429	-3.02041	-3.3637	-3.39939	-3.35694	-3.8816	-2.74542	-3.47799	-3.2406	-2.57503	-3.74253	-3.87769	-3.49685	-2.93163	-3.3379	-3.22721	-2.89595	-3.85007	-3.61711	-3.4188	-3.50456	-2.50909	-3.48602	-3.29043	-0.187867	0.48886
CUTA	no	no	1.90276	1.16906	1.59553	0.53143	1.48643	1.50513	1.50265	3.33682	3.53861	3.18706	1.80006	2.46189	5.19428	3.83277	0.727665	2.44494	4.22261	2.4496	4.19997	1.56362	2.79494	2.58649	3.86124	2.6988	2.23521	3.48856	2.95723	3.87575	3.19072	2.58473	3.51325	2.04325	4.50159	2.9258	1.83977	5.70145e-06
CTSV	no	no	-3.32476	-4.07555	-3.26695	-0.241817	-2.96908	-3.106	-2.93871	-3.28487	-3.08043	0.578269	-3.24411	-4.01386	-3.25068	-0.895883	-4.48764	-3.85665	-3.56402	-2.61783	-3.35107	-3.77584	-4.75112	-3.93329	-4.50671	-4.05397	-3.39689	-3.35076	-3.66604	-3.44466	-4.1384	-3.62403	-3.23411	-4.33201	-3.15552	-4.15324	-0.466069	0.433335
PFDN1	no	no	-3.78747	-3.30447	-3.0446	-3.20865	-2.99527	-3.10082	-3.29475	-0.664724	-1.44411	-3.35162	-2.04642	-1.91076	-3.04814	-3.36535	-2.78905	-3.17171	-3.06719	-1.92981	-1.94494	-3.32465	-3.4566	-3.10487	-3.31963	-2.51421	-2.9962	-2.69615	-3.06563	-3.24357	-2.77701	-3.57814	-3.20232	-0.728678	-2.52483	-0.948614	0.682006	0.00160917
FCGR3B	yes	no	-1.08001	1.1312	-1.05876	1.46645	-0.326792	0.490938	0.289674	3.86952	2.08074	-0.0280578	-0.919802	5.3233	5.27063	4.02694	3.0245	-2.14371	-0.312536	-1.27712	4.00192	-0.421254	1.70642	2.85046	0.570287	-1.34756	3.18017	2.45548	0.859164	4.72112	5.02202	3.91837	1.41115	2.12282	6.18894	2.46331	2.12073	0.00430404
EFCAB14	no	no	-2.26875	-4.51964	-1.79848	0.000556191	-1.83491	0.614417	-3.42979	1.91323	1.4402	1.3098	-1.94529	-1.63414	1.84589	2.11137	-2.03052	-0.946682	1.18364	-0.135035	2.23806	1.16475	-0.132452	0.87361	0.745422	2.41001	-1.46919	0.761054	1.61146	2.82688	0.287754	-0.927881	1.38795	0.831011	1.93896	2.10978	2.36533	0.0218202
LRP3	no	no	-3.78911	-4.4977	-4.20252	-2.57032	-4.67424	-2.00184	-3.89855	-3.635	-3.66873	-3.96493	-4.42409	-2.57609	-1.49132	-3.4393	-4.50176	-3.31429	-1.47634	-4.23111	-2.99942	-3.20696	-1.30858	-4.00318	-2.51124	-4.09748	-3.7488	-3.45331	-3.19411	-2.10122	-2.89215	-3.97866	-3.74009	-4.58339	-4.06303	-4.29319	0.249942	0.597712
WDR1	no	no	-1.29163	-1.51995	-2.85578	-1.05154	-1.16839	-1.03824	-2.05392	1.81296	1.49012	-0.0926115	0.0789149	1.45612	-0.493421	-1.37955	2.48899	3.03056	-2.00852	1.66488	-1.24703	-1.47886	-0.426395	-0.708371	0.0986772	-1.00684	2.1579	0.655767	-0.815998	-0.706436	1.22182	1.86696	1.19509	3.65013	-1.33549	-0.89075	1.89752	9.96116e-05
FZD7	no	no	-2.83342	-2.48173	-2.40112	-0.382007	-2.56279	0.172199	-2.52616	-1.67403	1.40737	0.752942	-3.17668	-1.10273	1.5789	2.01196	-2.17553	-1.47637	-0.0575281	-2.50794	1.03724	-1.34391	2.02091	0.623995	0.908969	0.926767	-1.71459	0.454516	-0.949944	2.35691	-2.88993	-2.08187	-0.368317	-0.922021	2.15068	0.635364	1.50007	0.0296715
SLIT3	no	no	-1.25296	-0.793656	-2.30232	-0.809459	-2.60373	-0.888241	-3.0686	-2.36317	-4.48068	-2.32488	-4.36868	-3.77561	-0.969527	-2.22594	-3.47935	-3.81153	-0.469154	-3.85646	-2.62419	-2.08812	-1.36795	-2.47632	-3.16998	-2.08279	-3.47276	-3.77282	-2.44217	-1.70787	-4.14182	-3.62218	-1.92679	-3.80915	-1.82848	-3.75464	-1.1684	0.030269
MEGF6	no	no	-1.36878	0.0646523	-2.21548	-0.368743	-1.80296	0.393739	-1.93328	-1.00889	-0.914199	-1.74175	-1.59344	-2.18767	-0.184638	-0.202964	-1.51232	-1.96507	0.407585	-0.578562	-1.86521	0.300816	-0.787348	-1.81091	-2.13086	0.355604	-2.27977	-0.782559	-1.09177	-0.0408415	-1.71714	-2.07289	-1.14466	-1.60414	-2.58848	-0.577725	-0.0448732	0.937582
LDB3	no	no	-2.47947	-2.81892	-2.54679	-2.29409	-2.46247	-2.57878	-2.51143	-2.38566	-2.55401	-3.00313	-2.27639	-2.36354	-2.58234	-2.48604	-2.55342	-2.3351	-2.32329	-2.412	-2.64149	-2.79857	-2.45032	-2.42943	-2.55741	-1.06773	-2.54726	-2.61216	-2.42715	-2.21484	-2.44912	-2.5366	-2.04719	-2.26961	-2.23948	-2.35749	0.092919	0.495674
CPNE3	yes	no	-1.69869	-2.1185	-2.57562	-2.10281	-2.04764	-3.08478	-2.05461	-0.912295	-0.880061	-0.218022	-0.27343	0.683652	-1.32584	-2.12758	0.00413196	-0.638793	-2.35196	-0.732571	-1.10743	-2.15592	-1.67221	0.0552345	-2.46413	0.0706449	-1.22944	1.1543	-1.36797	-0.515577	-2.27155	-1.415	0.179893	0.255281	-0.52233	-2.01045	1.53602	9.82437e-06
ICOSLG	no	no	1.25629	3.78969	2.1233	3.4684	0.869231	4.14869	1.90176	4.84831	3.72394	2.87461	-0.280534	1.18692	5.23136	3.40376	1.29391	2.311	5.49348	2.53998	3.91165	2.16167	4.405	4.16722	3.78893	0.958596	1.23978	1.92048	4.66366	3.34819	3.19954	1.92781	3.45097	0.90881	5.34246	4.02556	0.530584	0.438601
DNAJC13	yes	no	-4.04465	-3.92693	-4.2189	-3.90163	-4.08453	-4.11316	-4.06372	-4.38775	-4.19823	-4.09561	-4.0434	-4.26082	-4.25931	-4.00297	-2.3102	-3.80391	-4.04482	-3.95323	-3.86701	-4.25716	-3.94563	-4.0828	-3.97663	-3.79353	-3.81902	-3.84881	-4.19197	-3.828	-4.04397	-4.03802	-4.27535	-3.54547	-4.28543	-4.00478	0.209076	0.177968
ADAMTS4	no	no	-2.74411	-2.51134	-2.49429	-2.63461	-2.75307	-2.93032	-3.08051	-2.56166	-2.17459	-1.85874	-3.47523	-2.92932	-2.57923	-3.07974	-3.19579	-2.64297	-3.01425	-0.168926	-2.71989	-1.34418	-2.89421	-2.84892	-2.53834	-0.353141	-3.3258	-0.575584	-3.3758	-0.541322	-2.89489	-2.80409	-1.06354	-2.67574	-2.53415	-2.21938	0.453357	0.0299975
GGCT	no	no	-1.34949	-1.57963	-1.0097	0.705846	-2.12017	0.134072	-2.19052	-0.137397	0.817403	0.329333	0.780671	0.988132	-0.062626	1.29337	-0.749128	-1.75191	-0.516011	0.506684	1.78684	-0.348062	-0.21117	0.781087	-0.627207	2.52517	-0.384388	1.07097	-1.43108	-0.224772	-1.99523	-0.026257	-0.602745	-0.0216933	0.256351	-0.639941	1.36566	0.0381956
SMIM24	no	no	-2.49887	-2.53237	-3.02561	-2.60343	-3.16131	-1.53095	-2.83419	-1.91126	-1.04748	-0.863313	-3.3699	-1.10563	-1.0744	-2.94363	-0.473085	-3.44614	-0.688044	-0.668597	-1.83054	-0.868181	-1.09328	-2.16407	-2.03993	-0.818197	-2.45672	-3.16121	-1.97923	-1.10574	-2.2513	-3.44302	-1.43593	-0.241593	-1.07614	-1.71896	1.1561	0.00443492
CDH16	no	no	-3.7735	-4.09366	-3.92004	-3.67763	-3.09	-3.66536	-3.41302	-0.752932	-0.429923	-1.90395	-3.156	-3.20432	-2.65253	-1.81468	-3.93579	-3.21276	-4.25578	-2.84619	-0.85791	-3.09081	-2.77846	-1.86889	-3.19474	-1.78677	-3.60763	-1.15795	-0.814548	-0.0396873	-1.51126	-2.789	-1.22971	-2.7317	-0.794468	-2.42712	1.53584	0.000162745
SEMA7A	no	no	-4.76594	-4.33324	-4.77601	-5.0366	-4.63387	-4.46192	-4.90429	-4.60369	-3.23512	-2.92962	-5.00015	-4.14991	-5.0736	-5.21254	-3.43998	-2.23504	-4.36641	-5.28416	-2.44224	-4.40951	-4.90002	-3.58377	-3.18217	0.973942	-4.18811	-5.04373	-3.56322	-3.63662	-2.99417	-2.52811	-4.69083	-3.76139	-4.82346	-4.70867	0.810794	0.0185248
CILP	no	no	0.349347	2.05082	-1.04108	0.72871	0.00478187	1.35694	-2.0224	-0.0022019	0.122566	0.344094	-3.29447	-2.15462	1.28786	0.473154	-1.50557	-1.61496	1.21505	-1.58557	0.832192	0.811005	0.918229	-0.114827	-0.437825	1.00101	-2.40596	-0.444497	1.30364	0.280651	-1.369	-3.25349	0.742182	-1.31808	0.328521	0.585117	-0.761149	0.209986
PDCD6	no	no	-2.40705	-2.08833	-2.36502	-2.78364	-2.74585	-2.8886	-2.71546	-0.745936	-1.16772	-0.305016	-2.12952	0.622822	-0.75844	-0.984492	-0.915671	-0.452687	-5.17361	-2.46808	0.28831	-2.46168	-2.3022	0.210587	-1.49475	-1.37401	-2.00926	-0.404277	-1.97881	-0.87516	-1.67203	-1.07879	-0.355506	-1.95918	-0.352309	-1.32493	1.41119	0.000200819
TBCA	no	no	-1.51022	-1.79628	-2.05037	-1.22615	-1.54083	-0.814837	-1.54532	0.603635	1.08301	0.310926	2.32612	0.810769	-0.0302147	-1.37469	-0.367562	-1.68444	-1.64632	0.147675	0.304338	-1.01575	-1.44001	-0.936549	-0.763208	1.62546	-0.0706442	1.29328	-0.845631	-1.20306	-1.7494	-1.07437	-1.37842	1.77061	0.972878	1.46392	1.45526	0.000435413
ATP6V1G1	no	no	-2.28241	-2.73564	-2.87165	-1.96751	-2.67173	-2.38356	-2.57587	-0.836565	-2.18904	-0.752853	-0.151059	-2.09834	-1.60508	-1.73792	-1.97069	-1.21312	-2.16133	-2.91397	-1.59088	-2.61065	-1.87182	-1.08891	-2.96971	0.0484984	-1.78337	-1.29537	-2.95752	-0.743129	-2.17439	-1.95543	-3.04456	-1.92639	-1.82219	-0.899823	0.831914	0.000721498
VPS4B	no	no	-2.58342	-2.23853	-2.01078	-2.35031	-2.48288	-1.27652	-1.74378	-0.477927	-1.5034	-0.463691	-1.3618	-1.79562	-0.325072	-0.770721	-2.268	-1.26185	-1.36844	-1.81514	-0.440607	-2.20021	-0.416978	-0.995441	-0.661346	-1.39193	-2.03721	-1.91953	-2.01083	0.16815	-1.68012	-1.09442	-1.39264	-2.26617	-0.806161	-1.1987	0.915273	0.00153691
ENTPD6	no	no	-3.69369	-3.00281	-3.46361	-3.66294	-3.3194	-3.82438	-3.6501	-3.04328	-2.03676	-3.25862	-4.03437	-3.08997	-3.34683	-2.82306	-4.12074	-3.61232	-3.70715	-2.62158	-3.87078	-3.8361	-3.444	-3.67276	-3.58285	0.394967	-3.35255	-3.58917	-3.24637	-1.43402	-2.9444	-3.95871	-3.01914	-3.922	-2.03442	-4.22253	0.406808	0.189848
ENTPD5	no	no	-4.53767	-4.38835	-4.65936	-4.29566	-4.42281	-4.5521	-4.59459	-4.33962	-1.44023	-2.69756	-3.38159	-4.47022	-4.29296	-4.0639	-3.42889	-4.2293	-4.88608	-5.11729	-3.21832	-4.74644	-4.69852	-4.06904	-4.84732	-4.14521	-4.5227	-4.89855	-2.59339	-4.22762	-4.53084	-4.97072	-3.58591	-3.28267	-4.32739	-4.32366	0.532754	0.00454604
BCAS1	no	no	-3.426	-2.75176	-3.46543	0.381172	-3.09044	0.13767	-3.09903	0.590065	-1.52645	-2.47639	-3.46208	-3.04256	-2.05877	-2.83562	-2.52007	-2.70193	-2.92224	-1.4064	-1.00441	-1.92732	-3.50712	-2.12179	-2.26834	-0.565428	-1.35797	-2.18828	-2.58406	-1.15236	-2.86018	-1.51351	-2.83201	-2.37264	-2.28809	-1.10349	-0.0508323	0.951249
MACROH2A1	no	no	-3.812	-3.73556	-3.73959	-4.70478	-4.49876	-3.88243	-4.49746	-1.55449	-1.0985	-4.97775	-2.41412	-1.23872	-3.67778	-3.94781	0.192021	-1.01668	-4.11924	-3.60043	-3.52724	-3.38215	-3.71131	-3.98214	-4.54429	-1.56822	-1.63647	-2.34484	-3.81729	-4.48856	-3.16349	-2.32621	-2.83576	0.54401	-3.56978	-2.71496	1.36511	0.000458655
SH3BGRL	no	no	0.583855	0.451309	-0.215932	-0.356976	1.49826	-0.531591	0.887217	2.51843	3.78143	1.96538	3.4527	3.64134	2.0055	0.515252	2.27676	1.892	0.50205	2.80696	5.0529	3.53436	1.00663	0.583904	1.0521	4.76698	1.53826	3.58295	0.993223	4.64891	0.309112	0.863019	4.77807	4.43567	2.59142	3.02414	2.07264	3.31612e-05
FLNB	no	no	-1.69985	-1.28436	-1.29981	-0.768558	-1.37296	0.212248	-1.19973	0.724191	0.241642	-0.153548	-0.809142	-0.885802	0.485081	-0.770289	-0.323814	-1.27362	1.03695	-1.02225	-0.274575	-1.05043	-0.469681	-0.904809	-1.05544	-0.494175	-1.66495	-0.469021	-0.564585	0.382586	-1.03127	-1.41676	-1.03986	-0.471439	-0.575713	-0.754429	0.522823	0.111035
CS	no	no	-3.04863	-3.44681	-3.41949	-3.01891	-2.96276	-4.14757	-3.03638	-0.341944	0.118752	2.40392	-2.83367	1.09008	-3.63741	-3.75019	-1.04046	-1.17224	-3.30064	-3.30832	-0.368577	-2.82587	-3.01206	-3.27933	-2.04738	-0.0637641	-3.71177	0.447326	-3.48322	-1.94479	-3.28231	-2.86075	-3.13604	-1.67077	-1.66168	-2.83316	1.66443	0.000760822
MRPL33	no	no	-3.13974	1.78121	-3.60163	-3.76374	-3.83843	0.61114	-3.09406	-1.95251	2.26929	-4.49548	-4.21654	-5.17409	-4.54771	1.29231	-5.58923	-3.49205	-3.10071	-5.69635	-2.0424	-3.43394	5.15103	-4.43218	1.19999	-3.9869	-4.66385	-3.85179	-1.50926	-4.10136	-3.388	-4.30277	0.817728	0.263583	-2.91625	1.90141	0.80609	0.589567
SEC22B	no	no	-4.5105	-4.62727	-4.67252	-4.56263	-4.60992	-4.67206	-4.50826	-4.51666	-4.6433	-4.66258	-4.55128	-4.66749	-4.50452	-4.59664	-4.00148	-4.53327	-4.5228	-4.57144	-4.51875	-4.46308	-4.5286	-4.58995	-4.50662	-3.82947	-4.5632	-4.28487	-4.44499	-4.51409	-4.53877	-4.62709	-4.41387	-4.53207	-4.60169	-4.54168	0.0260247	0.666851
VPS26A	no	no	-3.4071	-3.03051	-3.50693	-3.47452	-3.30998	-3.18987	-3.36184	-1.12132	-0.595219	-2.30036	-1.09196	-0.882159	-3.61143	-2.80173	-0.374698	-2.05679	-3.40456	-3.19531	-2.5877	-3.33417	-3.17614	-2.80643	-2.7913	-2.58664	-1.93318	-2.17733	-3.26267	-3.38649	-2.20533	-2.22424	-3.15712	0.226241	-3.26596	-2.81115	1.04957	0.000392789
GPC4	no	no	-2.16397	-2.44741	-1.84089	-2.12915	-2.33715	-1.83674	-1.92688	-1.37915	-0.0189497	-0.308571	-1.95884	-0.9741	-1.71583	-0.869994	0.111451	-1.82553	-1.67399	-1.72335	-1.02195	-1.97033	-0.433149	-1.76833	-0.162178	-0.860685	0.212188	-0.258108	-0.299701	-0.809346	-0.953706	-0.767021	-0.732506	-2.78656	-2.05065	-1.50197	0.881627	0.000485575
CLN5	no	no	-0.422985	-0.642394	-0.179483	-0.789748	-0.276051	-0.432193	0.164069	2.62308	3.01644	1.79279	-1.34382	2.21001	1.29803	2.75035	-0.144729	-0.484108	0.0381458	0.630072	3.15478	-0.36954	0.954086	1.00913	-0.110161	0.972858	-0.186232	2.38308	1.03911	2.87104	1.21573	0.21099	1.73022	1.01971	3.27832	1.22073	1.67909	1.64138e-05
HSBP1	no	no	-2.30863	-2.19579	-2.17936	-2.438	-2.04617	-2.07686	-1.9043	-0.70402	-1.70014	-2.19842	-0.714618	-2.18847	-2.4301	-2.73697	-1.49447	-2.04148	-2.40679	-2.3816	-1.24401	-2.16145	-2.30883	-2.12308	-1.96986	-1.73426	-2.48418	-0.900458	-2.65533	-1.39991	-2.45662	-2.58938	-2.01756	0.417324	-2.14451	-1.3325	0.527575	0.00508337
BANF1	no	no	-1.54288	-1.68382	-1.80978	-1.77739	-1.24722	-2.09995	-1.52577	0.29001	0.642646	-0.298678	-0.524421	-0.136101	-0.143011	0.846157	-0.453891	-1.39889	-2.11064	-0.418164	1.33038	0.306368	-2.02736	0.336964	-3.2308	0.564683	-1.6938	0.37579	-0.303222	0.652481	-1.08425	-0.76785	-0.237808	-0.553833	1.28599	-0.197196	1.43708	6.44999e-06
SKAP2	no	no	-3.23435	-3.31032	-3.16012	-3.15547	-3.27008	-3.55061	-3.0852	-2.35292	-2.35733	-3.09858	-1.59959	-2.14081	-3.0379	-1.16021	-1.2912	-0.69948	-2.67558	-2.25297	-4.16743	-3.12951	-3.35289	-2.742	-3.16023	-2.49798	-3.15434	-2.08181	-3.00682	-3.62177	-2.02268	-1.86947	-3.02377	0.0234928	-2.82554	-2.95791	0.876988	0.000760822
LRP6	no	no	-3.98547	-3.87322	-3.84199	-4.0698	-4.36781	-4.11629	-4.47757	-3.57284	-3.02068	-4.09599	-4.36596	-4.12412	-4.28119	-2.68679	-4.13626	-3.97003	-4.22557	-4.20318	-3.4195	-4.23415	-3.95741	-3.78187	-4.03759	-4.32344	-4.28678	-3.95609	-4.40527	-3.40611	-4.15485	-3.98626	-4.16874	-2.31599	-4.10503	-4.10333	0.110442	0.459871
PGLYRP1	yes	yes	-1.33142	-3.36635	1.67737	-0.352865	-1.27002	-0.804519	-0.115663	5.59306	6.24095	5.36809	3.99354	6.88833	4.88778	7.23569	4.89553	5.17931	1.19431	4.26692	6.05018	3.2042	3.51922	3.71111	2.76521	3.29314	5.44891	6.79392	6.22505	5.5575	7.25748	5.1043	6.01846	6.93932	3.81139	4.49833	6.0321	6.44999e-06
LYPLA1	no	no	-2.72918	-1.65089	-2.61802	-2.335	-2.37899	-2.62292	-2.25281	0.254948	0.827119	0.0899098	0.878093	1.30339	-2.17188	-1.35586	-0.444248	-0.351964	-2.47958	-1.07871	1.19113	-1.84551	-2.45671	-1.62617	-1.55903	-0.559917	-0.0169033	0.984909	-2.00411	0.269645	-1.40788	-1.3282	-1.69241	1.06923	0.464238	-0.926218	1.74299	2.38238e-05
CREG1	yes	no	-4.73377	-4.33713	-4.52553	-4.37924	-4.73062	-4.06635	-3.94716	-4.19345	-3.65846	-1.76912	-3.92137	-3.31738	-1.96023	-4.15489	-4.67319	-4.70918	-4.2833	-4.63091	-3.76037	-4.68921	-3.60807	-2.54099	-4.95183	-4.14925	-4.40037	-3.89242	-3.86114	-3.63019	-4.55124	-3.05999	-4.29027	-4.79552	-2.12444	-4.47692	0.733785	0.00341521
UPK3A	no	no	-1.17544	-3.84764	-2.89075	-2.60149	-3.73317	-4.33001	-3.7941	-1.89976	-3.69087	-3.0798	-3.63632	-3.92413	-0.744261	-1.50154	-4.15361	-3.19591	-2.9447	-3.66724	-0.442877	-3.25067	-2.4113	-2.32244	-3.04285	-0.271104	-2.68035	-1.9399	-1.6346	-2.26255	-2.59112	-1.68217	-2.8384	-3.27739	-2.7076	-2.1804	0.478932	0.363383
FCN3	no	no	-2.40355	-1.1071	-1.02639	-2.30359	-0.706586	-2.17729	-0.614366	1.40207	-1.80506	2.3671	0.856988	1.76782	-1.01529	-0.218115	2.29679	3.67091	-0.88072	-2.44096	-2.39412	0.272026	-0.636131	2.61255	2.33104	-1.09208	3.26999	1.39316	-0.853881	-2.56052	0.988113	2.30488	-1.39911	1.85973	1.05474	2.57541	2.25182	0.000305478
TOM1L1	no	no	-3.36118	-2.83487	-3.37437	-3.25547	-3.17223	-2.60692	-3.14599	-1.98117	-2.17812	-2.02869	-3.31021	-3.17726	-2.48021	-2.40186	-2.83246	-3.24014	-2.38069	-3.26209	-3.35447	-2.8746	-1.27028	-3.35317	-2.1679	-1.77249	-3.43015	-3.05111	-3.2762	-1.68234	-2.9766	-2.87746	-3.43739	-3.41983	-1.33629	-3.06459	0.516398	0.0159497
PPM1B	no	no	-4.24755	-4.02624	-4.0751	-3.61957	-4.28566	-3.95959	-4.37638	-3.16443	-3.63965	-4.19017	-1.40569	-1.5171	-4.99291	-3.75324	-1.29875	-1.20203	-4.12255	-3.99126	-3.85667	-4.05432	-3.7647	-4.42734	-4.88741	-4.52409	-4.08779	-2.43999	-5.36682	-3.45517	-4.43826	-4.59473	-4.22121	-0.689397	-4.69665	-4.24982	0.732617	0.0507786
RP2	no	no	-2.49963	-2.58719	-2.30699	-1.67175	-2.42415	-0.773034	-2.09388	0.0879007	0.0657535	-1.80152	-2.0634	-0.309289	-0.697511	-2.67727	0.811227	0.47646	-1.04531	0.274825	-2.01041	-1.98895	-0.202333	-2.51655	-1.79883	-0.356099	-0.930649	-0.88848	-2.06268	-0.659071	-1.42579	-2.32287	-0.949531	0.713664	-0.905487	-1.3891	1.06012	0.00629194
B3GALNT1	no	no	-3.52635	-3.37876	-3.7844	-3.44642	-3.32832	-3.20428	-3.40027	-3.18293	-1.95139	-3.07339	-3.68096	-3.80714	-2.28078	-1.02321	-4.19821	-3.5307	-3.58487	-3.45414	-1.43177	-3.86962	-1.98051	-2.60618	-3.59802	-3.41834	-3.50498	-2.32763	-3.20485	-0.914696	-4.07625	-3.65964	-3.45739	-3.70495	-2.68699	-3.28721	0.628122	0.00386909
ATP6AP2	yes	no	-4.438	-3.99044	-4.12132	-3.8466	-4.3668	-4.08686	-4.34922	-3.71153	-3.22591	-2.54125	-4.20542	-2.56536	-3.7084	-3.91917	-3.51404	-3.73472	-4.13216	-3.79142	-0.701242	-4.01163	-4.40845	-4.44933	-3.04747	-4.52335	-3.76513	-2.74784	-3.75208	-0.969533	-2.15632	-1.50201	-4.00584	-4.19881	-2.57263	-3.77359	0.768251	0.00231877
EIF3J	no	no	-3.7347	-3.18369	-3.10449	0.260781	-3.56969	-3.43603	-3.47758	0.267401	-0.503728	-1.08967	0.175615	-1.51695	-2.72552	-2.66456	-2.67263	-3.97522	-3.47151	-1.64891	-1.14669	-2.49093	-2.19242	-1.38936	-2.82372	1.52742	-3.21089	-0.452276	-3.3999	-3.01075	-3.69832	-3.97027	-3.57204	-0.799124	-0.644112	-0.393127	0.904991	0.204655
CBR3	no	no	-3.74455	-4.41436	-3.9256	-1.93939	-5.01866	-4.42633	-4.50802	-4.12165	-4.70963	-4.05441	-4.58998	-5.08516	-3.56626	-4.17394	-4.22017	-4.09118	-3.67226	-4.56632	-4.17599	-3.66889	-4.30373	-4.41927	-4.52815	-3.94506	-4.63323	-4.1597	-4.61063	-4.83005	-4.40841	-4.54906	-3.99355	-4.30316	-4.03991	-4.28603	-0.368572	0.442767
UPK1B	no	no	-3.35045	-4.06	-4.24072	-4.12293	-4.05627	-3.9309	-3.08754	-3.73249	-3.40776	-3.96069	-3.58491	-3.81284	-1.8277	-3.90894	-3.6629	-3.92369	-4.06937	-3.59906	-3.06767	-3.43071	-1.15156	-3.71843	-3.39727	-3.741	-3.31518	-3.46475	-2.16988	-2.92621	-3.48527	-3.79402	-3.52383	-4.18434	-3.16066	-3.43652	0.148725	0.544043
AP1G2	no	no	-4.55166	-4.74396	-4.24274	-5.31431	-4.46214	-4.25636	-5.47064	-4.68206	-4.08028	-3.90772	-4.42846	-3.72757	-4.66497	-4.09815	-2.49948	-4.26654	-4.77812	-4.69433	-4.46021	-4.14598	-4.68873	-4.37842	-4.06673	-4.31002	-4.30128	-4.51995	-4.29628	-5.15102	-4.73043	-4.63322	-4.59243	-1.59984	-4.46287	-4.23458	0.131254	0.598281
IDH1	yes	no	-1.73808	-2.0274	-1.79356	-1.10148	-1.72245	0.659596	-0.96713	2.64404	3.53317	2.09087	0.743211	3.74154	-1.01356	-1.31547	1.21737	0.715084	-1.9064	0.149346	2.28778	-1.46981	-1.69794	-0.360055	0.99522	0.964715	2.95474	2.19544	0.612267	-1.16929	0.742509	0.55464	-0.718032	2.19427	1.2399	-0.290958	2.1169	0.00199717
ATRN	no	no	2.23924	1.7878	1.97726	0.611968	2.24942	0.32271	1.06133	4.15035	3.591	4.55345	4.12713	3.37636	3.79121	5.35646	4.37987	4.64393	4.40117	1.76294	3.91357	2.52904	3.86628	4.74295	4.66869	2.79494	3.96006	3.71031	3.7345	3.94968	4.08537	3.55709	2.78261	2.87688	4.72204	4.38762	2.24266	0.000290003
TNFSF13	no	no	-5.55121	-5.01226	-5.50232	-5.01877	-5.19391	-5.69328	-5.90427	-6.03297	-5.19192	-2.66434	-5.39741	-5.42063	-4.19742	-4.83557	-5.19399	-5.07924	-5.59344	-5.4486	-3.13883	-4.04992	-4.8345	-5.58717	-5.41078	-3.889	-5.94637	-5.34104	-5.26473	-2.93529	-5.53434	-4.98786	-5.83167	-5.48366	-3.77804	-5.62863	0.519356	0.0271445
ALDH1L1	no	no	-2.06702	-2.16736	-2.14369	-2.32258	-2.53066	-2.53464	-2.69028	0.0608111	0.515951	0.060325	-2.60083	-0.201868	-2.2956	-1.79677	-2.47227	-1.2414	-2.55284	-2.62463	-1.00115	-1.94226	-1.39443	-3.09711	-0.953326	-1.66204	-2.0504	-0.383426	-2.38295	-0.658189	-2.04123	-0.438544	-1.51794	-0.860814	-1.57425	-2.45312	0.930284	0.000672844
BBOX1	no	no	-2.88759	-2.37618	-2.95438	-2.92914	-3.16652	-2.98826	-2.36378	-2.03062	-0.0533666	-1.72174	-3.41417	-1.56618	-2.77817	-2.08658	-2.81603	-2.43829	-3.38384	-3.19767	-1.75605	-1.88653	-1.84058	-1.63141	-2.50175	-2.74974	-3.11769	-2.10874	-3.87577	-0.742994	-1.56839	-0.22583	-1.64099	-2.73373	-2.0491	-2.89294	0.704245	0.000907389
FLOT1	no	no	-3.52343	-3.18362	-2.56107	-3.00109	-3.15565	-2.91842	-2.85879	-1.17151	-1.70604	-1.14836	-1.78439	1.67817	-1.5667	-1.76502	-2.90843	-2.02364	-1.69589	-2.98625	-1.40293	-2.26033	-1.0783	-1.97589	-1.5464	0.213511	-1.8142	-1.65491	-2.78584	0.214424	-3.28853	-2.65098	-2.15456	-0.88781	-0.645243	-2.80667	1.29672	4.93503e-05
ATP5MG	no	no	-4.81779	-4.82349	-5.02358	-5.1443	-5.83427	-4.89945	-4.29335	-4.52068	-4.87999	-4.7409	-5.30085	-4.64977	-5.12892	-4.5676	-5.54366	-5.14339	-5.38821	-5.47783	-5.17116	-4.92165	-4.61873	-4.80489	-4.96453	-2.09486	-4.48111	-4.77951	-5.06019	-4.11709	-5.2237	-4.76072	-5.20243	-4.84736	-5.14721	-4.92817	0.199688	0.265519
CPD	no	no	-3.32681	-3.59718	-3.52734	-3.78271	-3.59616	-1.55523	-3.49876	-1.83056	-1.87093	-2.00093	-3.62791	-3.315	-2.87877	-1.5997	-3.5637	-4.19503	-1.55862	-3.16651	-2.01432	-2.95439	-1.78716	-2.81563	-2.00501	-0.765982	-3.38161	-1.89982	-1.94432	-0.901565	-3.5347	-4.05094	-2.63167	-2.43239	-1.94152	-2.57955	0.514813	0.157642
SASH3	no	no	-3.72955	-3.68435	-3.89472	-3.98972	-3.36933	-3.68872	-3.55341	-2.73721	-3.0321	-3.1832	-1.08623	-3.35227	-3.36657	-4.16973	-1.66589	-2.09699	-3.40961	-2.60263	-3.25481	-3.2419	-3.56882	-3.5929	-3.84741	-2.82366	-2.87709	-3.26093	-3.91062	-3.93687	-3.38959	-3.83355	-4.06908	-1.05635	-3.909	-3.79088	0.476724	0.0278589
KRT36	no	no	-2.82164	-4.92678	-4.06293	-4.9853	-4.90471	-4.19953	-3.7908	-4.51996	-3.68877	-4.30483	-4.33288	-4.46205	-5.18867	-4.1722	-4.38556	-3.81759	-3.89576	-4.46597	0.0162605	-3.23784	-1.1046	-5.32591	-3.59204	-0.821086	-3.91239	-4.63185	-4.18138	-0.228927	-4.67683	-3.42931	-4.82496	-4.10031	-3.43679	-4.36195	0.645337	0.122874
ANXA9	no	no	-2.18575	-2.3227	-2.34261	-2.30057	-2.06231	-1.96929	-2.44625	-1.73068	-1.78423	-1.47416	-2.19405	-1.90831	-1.3163	-2.43911	-2.43533	-2.47662	-1.35773	-2.31763	-0.927841	-2.20618	-2.04367	-2.22011	-2.11605	0.113044	-2.10569	-2.23817	-1.29828	-2.28176	-2.20546	-2.49981	-2.58256	-2.10408	-2.39596	-2.26441	0.19616	0.267151
NCR1	no	no	-4.30348	-3.98307	-4.07681	-4.5787	-4.11262	-4.23231	-4.10891	-3.3141	-2.84335	-2.82202	-3.83135	-4.21765	-3.79708	-3.55713	-4.34643	-4.16319	-4.09219	-3.84372	-3.44912	-3.91106	-4.46417	-2.65842	-4.13902	-3.70808	-4.34934	-3.12046	-3.08295	-2.5384	-3.98601	-3.81704	-4.05078	-4.78096	-3.12728	-4.04645	0.43243	0.00526277
TM7SF2	no	no	-6.13656	-4.38297	-6.82724	-6.1153	-6.15695	-0.206657	-6.20228	-6.4954	-6.43373	-6.0458	-6.06641	-6.05843	-6.07014	-5.24378	-4.8248	-2.58226	-5.81762	-6.28894	-6.31978	-5.30195	-5.548	-6.14338	-5.86226	-5.43273	-4.63006	-5.73836	-6.00857	-6.5129	-7.06023	-5.47075	-7.81192	-5.65768	-5.23169	-5.97835	-0.567648	0.613601
SNCG	no	no	-1.94412	-0.678623	-1.31075	-1.24514	-0.862419	-0.875408	-1.05735	4.78423	3.79235	2.24255	-2.13039	-0.00566541	2.65219	-1.48449	0.283937	-0.256952	-1.33086	2.19411	3.76965	0.3966	-1.3041	1.41856	1.42071	2.02105	3.5113	3.08233	1.76357	2.40411	1.33406	0.348285	-0.142859	1.96246	3.04111	3.72663	2.6808	3.17718e-06
CCN5	no	no	-0.9935	-1.92543	-1.36693	-0.355213	-1.37955	0.747628	-1.77444	1.27876	2.02881	1.53612	-1.77873	0.0540869	2.05897	2.24545	-2.51719	-1.49184	0.35964	-1.10801	2.76179	4.15631	2.34507	1.51381	0.912121	3.66599	-2.23257	1.4852	0.0365689	3.56896	-0.488821	-0.570108	4.9728	0.85062	2.00029	0.320343	2.35732	0.00156684
DDAH1	no	no	-1.91381	-1.51991	-1.61839	-0.958926	-1.24019	-2.68471	-1.06357	0.812558	1.80488	1.60383	-0.575599	1.43675	-0.142257	-0.586867	-0.475375	-0.812224	-2.17795	-0.179911	0.431229	0.284896	-0.130012	-0.130822	0.788372	0.127857	0.0311028	0.956058	-1.20115	1.13035	-1.26775	-0.83028	-0.494016	-0.437139	1.29467	0.106281	1.84319	4.92657e-06
B3GAT3	no	no	-5.4158	-4.37852	-5.29625	-4.5232	-4.91536	-4.55375	-4.67071	-3.48725	-5.09967	-4.79911	-5.88551	-4.9035	-5.07988	-4.25732	-4.75321	-4.9783	-4.63832	-3.72	-4.53666	-2.90549	-4.70701	-5.20174	-4.75118	-1.5615	-4.30466	-2.54391	-4.61466	-1.947	-4.40438	-4.65164	-4.26332	-1.82333	-5.27545	-4.22076	0.80996	0.00969435
LY6H	no	no	-1.66297	-4.74589	-1.46102	-0.230785	-1.36205	0.433645	-2.81265	1.54558	3.03697	0.530245	-1.78427	0.111504	2.42711	1.40714	-1.37825	-3.9283	1.66132	-0.485454	1.92272	1.57211	-0.505847	0.532639	-0.452257	0.945242	-1.38156	1.19727	2.44688	3.26735	-0.196347	-2.2165	1.50379	1.0363	0.690791	1.43122	2.10338	0.022911
STK10	yes	no	-3.98358	-4.44799	-3.76596	-4.10906	-2.96636	-3.35315	-3.31733	-2.13716	-3.18358	-3.73319	-3.62987	-2.43416	-3.11618	-3.46351	-0.76723	-3.99341	-2.84732	-1.74431	-3.59202	-4.35164	-3.57331	-3.46128	-3.75821	-1.95918	-3.74518	-3.13536	-3.78309	-3.79403	-3.01886	-3.64022	-3.725	-1.12382	-4.44107	-4.14433	0.735068	0.0063826
SLIT2	no	no	-2.3756	-0.753715	-1.83717	-0.461593	-4.04535	-0.626425	-0.699705	-2.07776	-2.90622	-1.67423	-4.08882	-1.57977	-0.837541	-1.35211	-3.18729	-2.96656	-1.15438	-3.35366	-4.28898	-1.43323	-1.79708	-2.91836	-2.70869	-1.56551	-3.19993	-2.28746	-2.03619	-1.08639	-2.67772	-2.79225	-2.07406	-3.44756	-1.82596	-2.89305	-0.827455	0.20453
MYO1D	no	no	-3.48379	-3.52577	-3.74528	-3.824	-3.49685	-1.79677	-3.55845	-3.34668	-3.64922	-2.51597	-3.7561	-2.99979	-2.20519	-2.68894	-4.24164	-3.98395	-2.31153	-3.90066	-3.30484	-3.40689	-1.29382	-3.25668	-2.45385	-1.7456	-3.63423	-3.42241	-2.54228	-2.30424	-3.21847	-2.47575	-3.77604	-3.94325	-1.90927	-2.86333	0.41839	0.268628
NFASC	yes	no	-3.30515	-3.07848	-3.27184	-3.2277	-3.37235	-1.85487	-3.39201	-3.36534	-2.80743	-3.22408	-3.37081	-3.4566	-1.47305	-2.76574	-3.49146	-3.29736	-1.54365	-3.28593	-2.8612	-3.30213	-1.57683	-3.29802	-2.93226	-3.45809	-3.06473	-3.65381	-2.48722	-2.69315	-2.67447	-3.17107	-2.8998	-3.29995	-2.39355	-2.76168	0.141517	0.622362
ADGRL1	no	no	-1.1222	-0.894532	-0.971448	0.67076	-1.30383	1.05388	-1.51539	1.68516	1.41054	0.699493	-2.05664	-1.15997	2.06564	1.64307	-2.76791	-0.15769	1.16976	-0.729308	1.40726	0.890682	0.365125	-0.111132	0.66658	0.902199	-0.805038	0.791247	0.653456	1.63394	0.548493	-0.436319	0.895495	-0.989884	0.536233	0.612759	0.901333	0.114811
ENDOD1	no	no	1.18451	0.33938	0.0492636	1.51297	2.1116	-0.228767	1.21094	5.16947	6.06556	4.27444	0.833612	3.18462	4.7384	5.32274	1.64604	0.240907	-1.09961	4.99416	6.39091	4.50143	3.30794	5.13817	0.634637	2.66825	0.344581	4.66358	4.76191	5.44363	3.67696	1.79976	5.38118	3.58956	5.07802	4.31701	3.0654	1.22502e-05
SEC31A	no	no	-5.30178	-4.94986	-5.23868	-6.02053	-4.67589	-5.56549	-5.07004	-3.07005	-4.711	-4.99107	-5.60019	-5.46555	-5.18172	-5.17716	-2.30917	-4.39053	-4.68519	-4.48829	-5.55914	-5.20542	-4.96122	-4.58878	-4.92168	-3.43167	-5.15284	-5.54449	-5.08653	-4.10112	-4.51197	-5.39396	-4.76874	-2.03499	-5.4202	-5.08675	0.13044	0.674512
CLSTN1	no	no	-2.46886	-2.76667	-2.12509	-2.0066	-2.11887	-1.58139	-1.93238	-1.06275	-2.15894	-1.24426	-2.41423	-1.77225	-0.0338245	-1.25877	-1.18148	0.154391	-1.72333	-2.56937	0.0344537	-0.722227	-0.48314	-0.978211	-1.2343	-2.35052	-2.02987	-0.687356	-0.972892	0.228548	-0.406011	-0.224824	-1.17057	-2.52009	-1.35186	-1.15296	0.819543	0.000507221
PRSS23	no	no	-2.15926	-2.7849	-3.35384	-2.37647	-2.98335	-3.49245	-2.18915	0.123775	-1.08397	-1.22444	-3.00414	-3.65086	-1.50592	-2.19917	-3.29798	-3.13903	-2.35134	-2.6905	-0.206822	0.254272	-2.03738	-1.62965	-2.44036	2.42237	-2.92247	-0.136867	-1.9323	0.725547	-2.7759	-1.42898	-0.0869399	0.891861	-0.420302	0.259049	1.21615	0.00552751
AKR7A3	no	no	-4.71526	-3.78873	-4.02626	-4.53387	-4.14579	-4.22141	-4.39232	-3.84611	-0.933189	-2.76161	-4.8059	-2.6068	-3.78539	-2.98403	-0.929817	-2.86642	-3.78846	-4.41281	-2.87926	-4.16621	-4.8092	-3.70294	-2.34317	-4.24169	-3.24609	-2.07564	-4.31381	-2.50001	-3.68061	-1.51677	-2.71906	-5.45037	-2.90619	-4.46535	1.11849	0.000161361
ZFPL1	no	no	-4.91243	-5.28534	-5.21488	-5.02218	-3.94449	-4.39296	-4.6802	-3.57214	-6.57719	-1.74242	-4.79812	-4.03134	-1.4587	-0.894319	-4.38111	-5.016	-4.8302	-4.81023	-1.56725	-0.264033	-0.80028	-2.94216	-3.0532	-2.37385	-4.65497	-2.75339	-4.85461	-0.26042	-4.52408	-5.17601	-5.36987	-4.79323	-1.76047	-3.68331	1.40762	0.00207563
UBL3	no	no	-2.94847	-2.98796	-2.76613	-2.93214	-2.70188	-0.544532	-3.29444	-0.906024	-1.94633	-2.98575	-2.8495	-3.03224	-0.933721	-1.08585	-2.60793	-2.68047	-3.1142	-3.25161	-2.49929	-2.75953	-2.48808	-2.02279	-3.53771	-0.957408	-3.12986	-3.22007	-2.8182	-0.711129	-2.09198	-3.11728	-2.78821	-3.30045	-0.487561	-1.41559	0.12846	0.797544
SCEL	no	no	-3.91435	-3.24772	-3.2763	2.23222	-2.40181	0.721947	-2.94965	-3.02969	-0.307133	-1.49849	-2.04643	-2.86051	-3.80831	-0.591165	-3.34921	-3.7723	-3.83376	-3.17138	-1.92199	-3.72086	-0.327684	-0.237213	-3.38567	-3.45377	-3.00618	-3.89286	-2.45365	-3.57841	-3.92858	-0.758009	-3.01026	-3.12611	-3.26975	-3.26561	-0.866506	0.438644
NDUFA7	no	no	-5.28105	-5.63834	-5.35908	-3.40982	-5.46918	-3.09687	-5.82477	-5.34641	-5.25069	-4.37627	-5.15466	-5.49268	-4.83916	-5.09304	-5.134	-5.00451	-5.89587	-5.66142	-5.80592	-5.56847	-4.65222	-5.0818	-5.82638	-3.3489	-5.95504	-5.40698	-5.66321	-5.46243	-5.36265	-5.55247	-5.68063	-5.41713	-4.98092	-4.69523	-0.364374	0.503123
UNC5C	no	no	-2.63796	-3.45016	-2.31851	-3.00908	-2.59138	-2.59299	-2.82115	-2.45765	-0.713618	-1.74176	-2.81434	-2.88248	-1.08625	-1.25948	-2.71554	-2.79516	-0.810039	-3.31885	-0.0246535	-0.738148	-1.69683	-1.99986	-2.49252	-3.24156	-3.06133	-2.01469	0.116661	-0.222986	-2.51511	-3.05716	-0.799163	-2.62038	-0.173943	-2.16853	0.892599	0.00160296
CSPG5	no	no	-2.1087	0.919868	-2.32511	-1.44867	-2.43752	1.46111	0.190767	-1.02157	0.724766	-1.17774	-3.20193	-2.28651	1.47405	0.390941	-2.99913	-3.00538	1.35486	-1.51165	-0.0214086	-0.902085	0.170439	0.0894337	0.0343855	-1.57707	-2.27952	-1.40318	0.289443	0.687308	-2.60882	-2.67652	-2.60076	-2.84415	-0.879217	0.369648	-0.163427	0.852948
LYPD3	no	no	-2.792	-0.399591	-3.0079	4.99857	1.82589	6.5475	-0.626413	-0.0850468	1.89967	0.921403	-0.462734	-2.04024	0.827376	2.45302	-3.10103	-2.61447	2.47033	0.0195433	0.909713	-0.403922	2.33039	1.77048	-0.703941	-0.623746	-2.69647	-2.22968	0.428102	-0.506463	-1.56344	0.0905652	-2.0457	-1.65832	-0.85663	0.0118347	-1.21143	0.494984
VAPB	no	no	-3.41322	-3.20462	-3.51336	-2.04207	-3.48268	-1.44676	-3.08178	-1.31314	-2.44121	-2.38087	-3.28201	-3.25078	-3.3781	-3.68537	-3.61647	-3.77085	-3.78085	-3.78813	-3.45003	-3.03809	-3.41803	-2.93887	-3.60293	-2.45512	-3.24346	-3.70178	-3.35797	-3.3444	-3.36627	-3.68889	-3.55765	-3.03372	-3.36687	-3.39648	-0.394353	0.301088
MPZL1	no	no	-3.21887	-3.52805	-3.67677	-3.57356	-3.76498	-3.55553	-3.23271	-0.736163	-1.65527	-3.63282	-4.07846	-4.2018	-1.77306	-1.53557	-3.93392	-3.36106	-0.815711	-2.79202	-1.36173	-2.58769	-1.26158	-2.44994	-3.31725	-2.91986	-3.84934	-1.79802	-1.73633	-0.237625	-2.96293	-2.61788	-2.00979	-4.1646	-2.65644	-2.38276	1.18839	9.19938e-05
PGLS	no	no	1.35283	-0.164015	0.864137	0.750963	0.403138	-1.51965	0.110994	3.49964	4.68712	3.67736	2.5	3.3221	2.97729	2.59661	2.07775	1.9799	-2.21551	1.72658	4.74051	2.49661	1.61488	2.89742	2.14159	1.97206	1.8131	4.26892	3.08127	4.42603	3.30853	1.84684	4.28134	3.42854	4.62149	2.07462	2.68588	8.03592e-05
ATG7	yes	no	-4.40398	-5.19746	-4.73011	-5.05071	-4.33578	-4.61796	-4.31534	-2.66956	-2.72025	-3.42509	-0.455664	-2.56357	-4.01406	-4.48621	-1.74565	-4.21682	-3.7799	-4.74212	-2.73075	-3.97462	-3.97288	-4.61109	-4.69932	-4.13574	-3.92468	-4.76622	-4.62229	-4.30238	-4.35124	-3.60326	-4.3548	-0.102087	-3.43701	-4.39508	0.605923	0.0693128
IPO7	no	no	-4.41497	-4.2428	-3.91297	-4.31345	-4.47482	-4.2333	-3.85329	-4.00391	-2.69826	-4.18896	-3.99803	-4.09029	-4.11517	-4.52333	-2.35295	-3.89201	-4.18746	-2.97885	-4.0891	-3.96486	-4.27301	-4.30886	-4.05971	-3.929	-4.61527	-4.28085	-4.45502	-4.34707	-4.14653	-4.17313	-4.16844	-2.11999	-4.19618	-4.29421	0.340123	0.0509651
TNFAIP8	no	no	-4.59795	-4.47198	-4.4894	-4.7923	-4.49163	-3.90056	-4.48171	-4.86848	-3.91691	-3.63604	-2.82279	-4.23008	-4.80429	-3.39199	-2.43335	-3.87194	-4.40741	-4.30988	-4.31081	-4.66183	-4.45531	-3.99686	-2.39652	-4.32109	-4.39077	-4.80456	-4.22717	-4.32447	-3.27629	-4.685	-4.13813	-3.4096	-4.14423	-2.53056	0.522256	0.00351985
RAPGEF3	no	no	-4.61369	-3.98098	-4.26766	-3.89768	-4.25194	-2.79481	-4.36305	-2.94083	-4.80773	-4.81527	-5.11285	-4.00469	-2.36187	-4.6208	-4.04416	-3.95604	-1.94189	-4.28577	-4.1563	-4.82206	-2.34969	-4.03884	0.0545532	-4.15026	-3.65407	-4.31251	-4.65736	-3.05066	-4.36528	-3.5393	-4.08864	-4.3469	-3.93835	-4.55445	0.442794	0.310983
PAPLN	no	no	-4.54743	-3.01898	-4.51852	-4.90048	-4.15585	-4.62864	-4.31449	-3.85563	-3.85425	-4.31093	-4.9778	-4.91269	-3.00146	-4.37375	-4.88165	-4.63935	-2.74372	-4.81331	-5.23607	-5.24673	-4.43395	-5.30543	-4.68058	-3.35637	-4.65668	-4.78004	-3.64514	-3.1458	-4.64865	-4.35969	-3.91893	-5.22418	-3.94261	-4.47611	0.183876	0.593659
AHSA1	no	no	-2.82801	-2.88176	-2.27596	-2.70206	-2.50765	-2.49055	-2.68791	-0.0553126	-1.52762	-1.80607	-3.14175	-2.33145	-2.32492	-2.38224	-1.82535	-1.77517	-2.35338	-2.53821	-2.71422	-3.12472	-2.44472	-2.66823	-2.258	-2.48742	-2.72232	-0.651193	-2.12867	-3.04359	-3.54582	-2.47161	-2.57664	-0.980866	-2.37557	-2.15825	0.28412	0.179724
SLC34A2	no	no	-4.93689	-5.72081	-4.72494	-5.30997	-5.03231	-5.00247	-4.53441	-5.97527	-4.65909	-4.86065	-5.34008	-5.39046	-4.71624	-4.97457	-5.68452	-4.82228	-2.63509	-5.79064	-5.06489	-5.40733	-5.36615	-6.0424	-4.68913	-1.34502	-5.75849	-2.81549	-4.30293	-1.91789	-5.3629	-5.37419	-3.60532	-5.46597	-5.25693	-5.28816	0.498329	0.093404
APOM	no	no	-1.33838	-2.23808	-1.67058	-2.34771	-1.71918	-1.29961	-1.95504	-0.83559	0.167243	1.5973	1.23104	1.37194	-1.20316	0.0866397	1.99747	1.50784	-0.535519	-2.3447	-0.574568	-0.714112	-4.95713	0.570636	1.00402	0.427554	0.358947	0.322615	-1.00285	-0.83587	-0.64051	0.0832152	-0.797853	0.13053	0.431221	1.58778	1.98811	4.21219e-05
ADAMTS2	no	no	-5.5515	-5.14816	-5.6434	-5.18581	-5.78848	-5.36407	-5.97498	-4.02016	-3.34249	-4.72996	-5.78599	-4.80661	-5.22751	-4.93843	-5.98413	-5.79443	-5.46225	-5.43645	-2.12615	-2.34686	-4.89926	-5.107	-5.01446	-1.06165	-5.78183	-2.17057	-5.38725	-0.10921	-4.98149	-5.04899	-5.17944	-1.84335	-4.40053	-3.85585	1.27563	0.000859924
MATN4	no	no	-1.76783	-2.2086	-3.16699	0.346682	-1.13741	2.89444	-3.98691	1.72379	-2.05451	-1.39957	-2.09961	-3.69905	1.89839	-0.187267	-3.25728	-2.39911	0.295663	-2.11625	-0.631733	-2.54396	-0.920793	-0.832923	-0.437092	-2.39446	-2.21239	1.06838	-1.62241	-0.865671	-1.46175	-1.04043	-0.305821	-4.52177	0.229871	0.288963	0.134345	0.912945
FMNL1	no	no	-3.40288	-3.28639	-3.05286	-3.37724	-4.23556	-3.72225	-3.68829	-3.06581	-2.99385	-2.51099	-3.69581	-3.67219	-4.41124	-3.45452	0.356853	-2.6258	-3.09505	-3.17189	-2.76482	-2.98172	-3.20169	-3.19996	-3.22139	-3.41282	-4.13937	-2.34793	-3.40186	-3.38327	-4.15142	-3.52033	-3.70749	-2.16134	-3.89919	-4.01628	-0.216897	0.529381
H6PD	no	no	-3.64856	-4.1754	-3.90767	-4.45843	-4.37017	-3.99262	-4.10578	-3.70812	-3.46373	-4.41275	-3.05612	-2.54158	-4.32011	-3.90171	-2.80891	-2.30788	-4.28424	-4.07768	-3.8304	-4.18173	-4.0126	-4.23804	-4.20273	-3.95232	-3.25998	-4.14164	-4.13592	-4.49161	-4.27234	-3.05687	-2.06894	-1.37861	-4.1876	-4.11468	0.353321	0.107625
ADGRL2	no	no	-3.00205	-2.37796	-2.72915	-2.52777	-2.1925	-2.59873	-3.13248	-0.407949	-0.282338	-1.35629	-2.62118	-2.44059	-0.540878	-0.0314504	-2.53869	-2.82231	-3.12508	-1.72996	-0.696399	-3.17166	-3.13099	-0.781178	-2.44158	-0.933844	-2.76547	-1.74241	-0.246129	0.129712	-1.51255	-2.12473	-0.91758	-2.1694	-0.538522	-1.21139	1.09779	0.000227913
VNN1	yes	no	-2.25575	-2.74116	-2.76499	-2.38279	-2.23926	-3.19627	-2.68601	-1.66736	-0.704587	-3.20901	-1.24359	0.0848561	-1.33124	-1.0987	0.0055991	-0.605005	-1.61016	-1.52699	-1.30424	-1.53116	-1.45942	1.3048	-0.415387	-1.29637	-0.863542	-0.518784	-0.717284	-0.35184	-2.54528	-0.731192	-2.70474	-1.39967	0.384257	-0.906164	1.46081	0.000134089
VNN2	no	no	-4.71911	-3.38349	-3.86629	-3.89601	-4.03236	-3.79442	-4.61533	-2.58439	-2.82493	-2.37084	-1.34221	3.41861	-2.28372	-3.27948	-1.42594	-3.70549	-1.44154	-4.22791	-2.04257	-4.64291	-3.94443	-2.56684	-3.31558	-1.08425	-1.96496	-1.68953	-4.75451	-2.64031	-2.31034	-1.68104	-1.50608	-2.39219	-2.04611	-4.30272	2.00221	1.19452e-05
NADK	no	no	-2.9306	-3.15268	-3.07804	-3.07104	-3.07796	-3.55604	-2.87085	-2.87455	-2.18549	-2.80172	-0.236037	0.457264	-2.3742	-2.49458	0.0694812	-0.640582	-2.94243	-2.01906	-1.40734	-2.62898	-3.77857	-3.81084	-2.7271	0.027716	-1.12308	-1.80568	-2.69163	-3.4402	-3.64425	-2.34401	-1.93147	0.775079	-2.9063	-3.2585	0.957472	0.0052549
ETHE1	no	no	-4.25398	-4.89236	-4.81606	-4.85263	-5.11108	-5.52508	-5.07826	-4.87274	-3.41919	-4.36718	-4.98678	-3.02195	-5.50827	-5.03904	-1.54757	-4.93655	-5.11076	-5.63759	-4.99022	-4.60817	-4.82289	-5.21637	-5.0543	-3.87265	-4.35824	-4.05148	-4.92772	-4.51908	-5.70385	-4.99366	-4.8698	-4.96953	-5.09488	-4.62206	0.370511	0.146269
FSTL3	no	no	-3.04583	-2.67121	-3.03662	-2.34924	-2.92519	-2.97758	-2.86184	-2.11229	-0.470092	-1.91486	-2.88395	-2.55971	-1.13763	-1.22307	-3.6626	-3.40272	-1.56709	-3.03558	-1.81278	-2.95647	-2.87162	-1.59637	-1.98232	0.764498	-3.42238	-1.96868	-1.06374	-0.953947	-2.38291	-3.60435	-0.970111	-1.62221	-0.479354	-1.85117	0.869547	0.00647471
RAB3D	yes	no	-2.58314	-2.82918	-2.71326	-2.75336	-2.62761	-2.78136	-2.87096	-2.07297	-1.6324	-2.31701	-0.899192	-0.186363	-2.82516	-1.70081	-0.929236	-1.06742	-2.64077	-0.873626	-2.20918	-2.59669	-2.555	-3.34188	-1.29772	-2.43364	-2.65588	-1.54631	-2.9981	-2.23569	-2.40065	-3.1873	-3.09753	-0.122194	-1.49793	-2.64239	0.884657	0.00122767
SNAP29	yes	no	-1.34814	-0.469061	-1.06864	-1.5324	-2.21503	0.866652	-1.3251	-0.146615	-2.0618	-0.894076	-1.77063	-1.57794	-0.801928	-0.40632	-1.89174	-1.29074	-1.6993	-1.79641	-0.0335452	-1.24955	-0.999004	-1.42346	-1.50931	-0.458784	-1.51755	-0.860081	-0.416466	0.904091	-1.50175	-1.75447	-1.16038	-1.63185	-0.716709	-1.40786	0.011872	0.983794
OXSR1	no	no	-4.95039	-4.71277	-4.52919	-4.24178	-4.86387	-4.27788	-4.22201	-2.48863	-3.25607	-2.78762	-4.63687	-3.90743	-4.10335	-4.42383	-2.53485	-3.07735	-4.2126	-4.28631	-3.24322	-4.4331	-3.11555	-4.0873	-4.71913	-2.00306	-2.77569	-3.07578	-4.55698	-3.98437	-4.77768	-4.46966	-4.47465	-3.78626	-3.05755	-2.77419	0.858457	0.00062185
LSM8	no	no	-3.99055	-2.44876	-3.98175	-4.42753	-4.15471	-3.70211	-3.83627	-2.38852	-1.88721	-2.6154	-1.04296	-1.64636	-4.12769	-2.99032	-1.52425	-3.1485	-2.72396	-3.89238	-1.86512	-3.73539	-4.34526	-2.78806	-4.22088	-1.89981	-2.89898	-2.02224	-3.93332	-3.57119	-5.70414	-2.98611	-4.23397	-0.451921	-2.26194	-2.23462	0.965695	0.0150134
AP2A1	no	no	-3.75925	-3.73911	-3.25506	-3.73348	-3.39457	-3.11629	-3.23548	-3.04511	-3.36592	-2.30665	-2.46547	-1.44094	-3.39897	-3.4184	-1.98724	-2.15413	-3.61677	-4.23407	-2.9221	-3.50501	-3.20035	-3.75616	-3.96264	-3.27289	-2.95076	-2.42717	-3.75413	-3.65334	-3.81408	-3.45343	-3.94304	-1.00035	-3.34595	-4.05864	0.563734	0.0102183
EML2	no	no	-1.51602	-1.34902	-0.995426	-1.09947	-1.12968	-2.03628	-1.24751	1.47452	2.18204	0.655275	0.914871	2.10144	-0.754435	-1.0165	0.654493	1.10086	-1.33801	0.0682312	0.216548	-1.06355	-1.33224	-0.978786	-0.847425	0.615972	0.554896	0.535675	1.51946	-1.3221	-0.00574027	1.22677	0.136926	1.98261	-2.53137	-0.905937	1.3761	6.23452e-05
BPNT1	no	no	-4.41063	-4.13021	-4.15422	-3.81161	-4.29068	-4.7708	-4.05085	-1.94968	-1.04478	-2.74817	-2.54126	-1.59593	-4.44897	-4.83559	-1.13264	-2.44242	-3.95549	-4.2193	-1.66033	-3.51418	-3.606	-3.21665	-3.27758	-2.68	-2.77947	-1.59284	-3.51175	-2.31871	-4.23023	-3.63891	-2.32936	-1.41657	-2.24342	-3.16621	1.19943	0.000161361
DDAH2	no	no	-1.33676	-0.840127	-1.84382	-1.25641	-1.35361	-2.33484	-1.50765	1.04034	2.28009	1.48231	-1.72699	0.521863	0.38216	0.506299	-1.30017	-0.827526	-1.45722	-0.0723438	2.28857	1.32766	-0.102502	0.915865	0.179531	-0.984105	-1.58016	2.14859	1.57319	2.4858	0.244979	-0.48876	2.65781	0.244792	1.66555	-0.693594	1.91598	0.000227328
EFEMP2	no	no	1.977	2.11241	1.4519	3.61449	1.24119	4.50884	2.02222	4.44644	5.45251	3.42675	1.77618	2.61582	3.1347	4.61342	1.29047	1.88888	3.17034	2.08556	4.53085	3.61895	2.3392	3.22625	1.9734	2.21138	1.33503	3.15048	4.60057	4.18577	3.06961	1.24785	5.17405	3.17278	3.26006	3.37425	0.787864	0.209986
SCGB1D2	no	no	-1.10181	-3.1499	-2.13908	-3.31571	-3.1954	-0.289853	-3.35131	-3.64752	-1.93903	-3.03202	-2.9416	-2.14535	-3.18501	-3.53399	-2.84291	-3.19873	-2.91227	-2.66775	-2.50285	-2.64035	-2.92207	-2.73447	-2.93796	-3.30985	-3.16859	-1.83168	-2.83215	-3.19215	-3.42086	-2.23574	-3.18662	-3.0653	-3.32087	-3.54836	-0.632235	0.279689
CD160	no	no	-2.44904	-0.867695	-1.89764	-1.91454	-2.49624	-0.218059	-1.93629	-0.505438	-0.0448981	-0.901593	-1.87746	-2.15037	0.231731	0.494408	-1.49314	-2.17886	0.485147	-3.13172	0.960074	-0.744671	-1.139	-0.832156	0.0273485	-0.887958	-2.3828	-1.09428	-0.415971	2.16214	-0.122005	-1.57559	-1.03343	-1.40615	-0.75512	-1.0389	0.750109	0.0722885
RECK	no	no	2.84822	1.63595	2.20508	-0.505692	1.71732	0.5086	2.44929	4.11293	4.13765	4.425	3.95245	3.64857	4.83987	4.34621	3.35518	3.53231	2.22879	3.16923	4.58879	4.52786	2.78219	4.39603	3.87704	5.10728	4.34185	4.23395	4.11545	5.23599	3.49824	3.56288	4.88896	4.18188	4.35882	4.70586	2.50014	0.00188655
NUDT3	no	no	-4.10075	-3.48685	-3.5557	-3.98406	-4.17578	-3.81144	-3.7229	-2.51043	-3.0896	-4.55319	-1.00336	-2.0461	-3.79328	-3.32494	-2.04194	-2.15738	-3.67085	-3.79039	-2.44984	-3.8433	-3.49549	-3.99607	-3.6475	-3.60809	-2.0957	-3.25389	-3.89467	-4.23597	-3.22921	-4.45079	-3.68806	-1.71548	-3.25735	-2.94716	0.718984	0.00200587
AGR2	no	no	-5.64833	-5.4883	-4.42239	-4.95273	-5.65833	-5.16116	-4.89593	-3.18302	-2.61612	-5.05298	-0.814833	-4.92834	-4.52829	-4.73318	-1.3543	-3.51402	-5.37105	-4.02185	-4.31173	-5.1696	-5.53018	-4.63977	-5.10498	-4.44193	-4.52838	-4.18411	-5.10838	-4.05783	-4.23602	-5.42419	-4.56555	-5.22215	-5.592	-5.75693	-0.0888873	0.824676
IL18BP	no	no	0.285038	1.81888	0.716716	0.762419	0.442539	1.86003	-0.035822	1.57508	1.71097	2.52414	-0.719243	0.154873	5.66836	2.58626	0.404551	1.25201	4.21396	2.6384	5.6671	1.35788	4.17727	0.884796	1.84498	4.46051	0.272771	2.51245	4.30338	5.71447	3.46753	0.636362	5.41304	3.45235	5.62986	3.37285	1.94864	0.000766042
NAPSA	no	no	-0.474034	-0.537106	-0.326121	-0.645173	-0.0617154	-0.407247	-0.13938	-1.18046	3.03867	2.7671	-1.14061	3.48902	0.516378	1.79933	0.889533	1.17692	-0.951103	0.113188	1.11765	2.10242	2.20348	1.8107	0.56085	1.23323	0.459235	1.46136	1.00253	2.82558	-0.338237	1.20745	2.21776	2.2823	3.65777	-0.986137	1.45688	8.89228e-05
MOCS2	no	no	-2.19806	-2.68226	-2.19368	-2.71139	-2.59464	-3.49367	-1.4535	1.8985	1.59603	0.37631	-1.95737	-2.65664	-0.691849	1.86028	-2.39841	-1.89843	-2.22464	1.00377	1.93122	-0.617417	-1.681	0.764889	0.327437	-0.513098	-1.1209	-0.297515	1.06207	2.27003	0.578266	-1.07367	1.2156	-2.03642	1.86581	0.537265	2.01007	0.000133774
CYB5A	no	no	-2.91249	-0.884535	-3.32237	-1.55582	-3.4635	0.997976	-1.98458	1.5086	0.177284	-0.453728	-2.89033	-4.15871	0.043962	-1.41525	-1.81588	-1.79831	-0.334539	-2.05209	0.00846744	-1.21278	-0.678381	-0.862889	-1.11247	-1.42434	-1.00851	0.473038	-0.995548	0.263408	-2.56877	-4.26672	-2.50552	-1.76221	-0.73064	-0.397094	0.470579	0.518971
ADH1C	no	no	-3.18072	-2.85123	-3.00106	-3.3801	-2.95169	-3.19393	-3.53092	-2.85758	-1.35117	-1.15505	-3.18916	-3.04193	-3.00745	-3.14603	-0.171432	-3.21658	-3.18364	-2.70832	-2.86378	-3.10554	-2.71746	-1.08802	-2.05386	-2.77771	-2.43009	-1.80114	-3.34854	-2.92913	-2.58572	-2.72033	-3.43122	-3.13563	-1.34175	-3.03879	0.719924	0.00702671
LDHA	no	no	-0.0886114	-0.107492	0.0685427	-0.285503	0.0580489	1.86168	-0.218387	3.21772	3.90945	2.42295	4.4005	5.71011	0.0216827	-0.0343814	3.13818	3.14799	-0.78583	2.85108	3.43416	0.927914	0.285725	0.340743	0.858012	4.56698	2.64175	3.0156	0.46239	0.981347	1.09265	2.07656	1.2406	5.06151	3.09927	2.55309	2.36441	0.000610452
ALDH1A1	no	no	0.246044	-0.717598	0.258823	-0.376959	0.0561919	-0.907673	-0.482451	0.985449	3.15932	2.72868	-0.307414	1.7045	-0.364444	1.10385	1.79158	0.348779	0.00924473	0.164286	1.94607	0.380661	1.08388	1.05922	1.35272	-0.116419	0.728754	3.16675	-0.700327	2.30029	1.00549	1.24519	0.995327	0.469683	2.706	2.29592	1.85645	1.95906e-06
GSR	no	no	-0.813015	-0.874121	-0.888581	-0.680938	-1.17945	-0.58646	-1.0572	1.13696	2.09322	1.54424	2.48088	3.47459	-1.10515	-0.393772	2.34741	1.51088	-1.33398	0.171915	1.24174	-0.205489	-0.397291	-1.23215	0.456187	2.53558	1.12465	2.04191	-0.829524	-0.758041	0.17821	0.653564	-0.557408	2.48054	1.49207	1.08958	1.48325	0.000107649
SOD1	no	no	-3.18154	-2.362	-0.720702	-1.60282	-1.09059	3.00283	-1.59977	2.91902	4.9185	3.04984	2.14375	3.59349	1.34358	2.8314	2.99306	0.749697	-1.467	3.57669	5.54842	3.36748	1.93485	3.50096	2.25884	3.67517	1.71258	5.24159	1.89087	4.97755	1.28366	1.83682	4.42126	3.39728	4.10442	3.51004	4.22617	0.00201533
CP	no	no	4.66436	6.11515	5.32002	4.78658	5.02218	4.14415	5.67243	7.12263	6.87585	8.26404	7.58013	8.84715	4.55492	7.25063	9.20991	8.75285	2.01773	6.37415	6.26605	5.29034	6.27672	8.02949	8.04866	4.39742	8.92057	7.54475	6.60438	3.8279	9.25988	8.55505	6.57051	7.93673	6.72523	7.23082	2.22501	0.000233312
F13A1	no	no	-3.64847	-3.93032	-3.75242	-3.98588	-2.62158	-2.45017	-3.39261	-0.221375	-1.33467	-0.312503	0.774387	-0.914269	-4.35219	-2.8737	1.18829	2.68151	-3.34668	-3.955	-1.36494	-3.62803	-4.03067	-0.293264	0.0907378	-3.6663	1.83303	-0.776406	-1.6952	-4.4284	1.51026	1.7378	-1.80266	-0.618636	-2.64213	-2.11438	2.05192	0.00147311
PNP	yes	no	-0.145757	0.0926439	0.0454462	0.01152	-0.233489	-0.627781	-0.642734	1.48665	3.40622	2.6603	3.43746	5.41354	-0.197292	0.0141255	2.45222	1.8889	-0.713301	1.58322	2.23987	-0.915468	0.220887	-1.2248	1.16181	3.2545	2.35548	3.78237	-1.13654	-0.066825	0.564079	1.36358	1.13336	3.92349	2.12465	1.8196	2.46844	1.92995e-05
HPRT1	no	no	-3.10626	-2.68894	-3.13386	-3.1269	-4.15998	-2.49306	-3.28737	-0.579856	0.0977372	-0.801288	0.677175	1.77536	-2.44825	-2.9557	0.309344	-0.788803	-3.60292	-1.41425	-0.074569	-3.45912	-1.78607	-3.60698	-1.987	0.451993	-0.732076	1.3799	-4.06512	-3.37081	-1.80062	-1.36726	-1.62655	1.20503	-3.34293	-1.82984	2.19389	9.80934e-06
GOT2	no	no	-3.16974	-4.14742	-3.42032	-3.74806	-3.74559	-3.68192	-3.33634	-0.542418	-0.436719	-1.80378	-3.78929	-0.439109	-3.39987	-3.57715	-1.75588	-2.76268	-3.63065	-2.61707	-1.97348	-3.4949	-3.21825	-3.4518	-3.53292	-1.20326	-2.73323	-2.29371	-3.97282	-2.25715	-3.93161	-2.07849	-3.37348	-2.07805	-4.18328	-2.99663	0.968424	0.000365783
EGFR	no	no	-2.60439	-2.79107	-3.04822	-3.27063	-3.12025	-3.16576	-2.91114	-0.417178	-0.298506	-0.481575	-3.7528	-1.38259	-1.61489	0.0520968	-2.52672	-1.2645	-3.26068	-2.58855	-0.261572	-3.337	-2.6665	-0.471989	-1.10741	-3.06498	-1.75817	-1.82828	-0.454901	-0.343961	-0.985558	-1.49809	-1.51015	-3.11542	0.256055	-0.86169	1.30031	3.84428e-05
PGK1	no	no	1.23696	0.708081	0.392008	-1.58045	0.569053	0.78879	0.995752	4.30219	5.61752	4.9526	6.22505	6.18777	2.17749	1.39586	4.79898	5.0554	0.302628	4.1798	5.34424	3.05151	2.12175	2.3506	3.6017	3.27588	4.74933	5.53164	1.93443	2.97966	2.9743	4.05048	3.39257	6.3495	4.68722	3.62785	3.24576	0.000102275
AK1	no	no	-3.02683	-2.87331	-2.91353	-2.66714	-2.13463	-3.17679	-2.52197	-1.36939	-0.957133	-1.64253	-3.05756	-1.78237	-1.70674	-2.91153	-3.03889	-2.31258	-2.80471	-2.53391	-2.87813	-1.3604	-0.318784	-2.24176	-1.60147	-0.781769	-1.35372	1.67358	-1.84327	-1.74248	-2.42709	-1.97826	-1.7279	-2.78594	-1.65545	-2.71602	0.806505	0.00200617
LALBA	no	no	-3.70897	-3.73768	-3.89412	-3.95927	-3.47581	-3.99494	-3.36614	-3.47188	-3.42526	-3.61651	-1.99755	-3.22324	-3.93273	-3.83585	-3.93436	-3.52324	-3.61581	-3.24599	-3.79894	-3.98542	-4.00698	-3.25255	-4.13035	-4.28165	-3.93955	-4.19022	-4.4735	-3.83638	-3.35688	-3.56093	-3.55495	-0.960384	-3.93631	-2.46704	0.156587	0.414654
F2	no	no	6.13085	6.08133	5.57009	8.33727	5.93132	8.7759	6.56875	7.47976	7.17478	8.83851	8.76003	7.48122	6.64673	7.25281	9.03227	9.72733	4.14114	5.78872	6.52131	6.74325	5.61467	8.59928	8.50937	6.83967	8.7986	7.70301	6.91361	5.97159	8.22764	9.47331	7.32898	7.37708	7.19749	7.13378	0.800959	0.247291
C1R	no	no	-1.20996	-1.69188	-1.30245	-0.683024	-1.38536	-0.955048	-1.40103	1.02258	0.0156281	3.04263	2.88848	1.08692	-0.474254	0.529529	3.30318	4.06023	-2.10561	-2.32168	-1.03866	-0.632057	-1.05335	2.54168	1.53237	1.55396	2.81822	1.93181	-0.0956115	-1.37444	2.64276	2.64015	-0.188754	1.62041	-0.642337	1.93418	2.03613	3.95338e-05
HP	yes	no	5.28678	4.39016	5.61356	-0.159425	1.80842	4.56587	5.34509	10.1592	8.59297	10.6651	10.337	10.5212	7.57032	9.00543	10.2506	11.3285	4.63799	8.64693	7.05144	9.44629	6.51733	11.1214	10.7226	8.08033	10.4894	10.0278	8.52579	7.88091	10.0747	10.4435	8.06276	10.8044	10.2358	11.3124	5.42266	0.00109053
HPR	no	no	-0.944788	-0.943433	-0.423414	-0.610399	-0.310433	-0.416998	-0.223564	2.97621	1.50582	5.00356	4.76967	3.41231	1.08924	1.33084	4.39808	6.15356	-2.65964	-0.409684	-1.1301	0.873152	-3.00123	5.3418	5.19587	-0.613356	3.92872	3.80304	0.517554	-0.802411	4.75794	3.94276	0.754864	3.05825	2.39302	3.78955	3.10185	2.01774e-05
F9	no	no	-0.781407	-0.985041	-0.301525	-0.411978	-0.0425187	-0.121615	0.00396179	1.45345	1.74433	3.6367	2.54689	1.48465	0.3744	2.12839	4.01414	4.2646	-1.41322	-0.448282	-0.277149	1.19339	-0.399138	2.86381	2.57677	1.17878	3.11143	2.04158	1.74184	0.134067	3.5682	3.18575	1.19563	0.744121	2.5132	2.19261	1.86722	2.99207e-05
F10	no	no	-0.754093	-1.04953	-0.00150294	-1.04486	-1.78553	-0.115368	-2.0821	1.71985	0.715644	1.7884	3.07137	1.75058	0.429973	0.629302	4.1248	4.17889	-1.41973	-0.429041	-1.2671	1.07487	-1.81199	3.22694	2.99132	0.234458	3.36505	2.10411	-1.1365	-0.237149	2.19335	4.11935	1.43624	0.661456	1.08012	2.53213	2.3293	2.49087e-05
CFD	yes	no	-2.10781	-2.3035	-1.21568	-1.47206	-2.36114	-2.4123	-1.45893	-1.25942	-0.0434056	0.167736	1.22794	0.765886	-1.84018	-1.57352	1.23264	2.2672	-2.08129	-1.97833	-0.778252	-0.238186	-1.83618	-0.195001	-0.694519	1.09128	0.889313	1.50163	-2.3712	-1.18802	1.58647	1.6913	2.24164	-0.331462	-2.25048	-1.72013	1.33683	0.000851473
PLG	no	no	1.99554	2.50092	2.12878	1.79068	1.27009	3.20205	2.58178	4.46463	4.14453	5.31101	6.28534	5.05708	3.33263	3.31183	6.73393	6.81343	3.07253	1.4788	2.35495	3.53806	2.29811	5.49242	4.19269	3.54548	5.99336	4.46385	3.68744	1.74147	6.1396	5.98901	4.62124	4.58927	3.2585	4.05385	1.91878	2.8537e-05
F12	no	no	-1.89954	-0.164525	-0.677674	-0.464813	-0.745779	-0.476097	-0.465513	0.384312	1.81958	3.0404	4.40257	2.39655	-0.434501	0.896076	4.92288	4.15589	-0.179847	-1.76625	-0.142301	-0.515821	-2.31531	2.99935	2.11074	0.177845	4.61131	3.23686	1.44746	0.350186	3.4571	4.93301	2.35466	1.23428	-1.68775	0.760986	2.8924	7.1021e-06
PLAU	yes	no	-1.99725	-1.1302	-1.73619	-1.21478	-1.40236	-2.17322	-3.05165	1.93906	2.26877	0.549357	-0.382835	1.45635	1.46264	1.96292	-0.465779	2.20957	-0.921156	0.558398	0.120796	-0.911838	1.82749	2.391	0.149567	0.781372	0.638317	0.735763	3.89664	-1.31519	2.28534	1.84308	0.945898	-0.580675	-0.843033	0.213163	2.15853	0.000735664
PLAT	no	no	-4.02724	-4.20908	-3.57446	-4.72723	-4.0973	-3.14359	-4.04106	-3.57174	-2.5864	-4.55818	-1.03012	-1.54035	-2.61521	-2.36967	-0.82459	-0.0686734	-3.41642	-3.6872	-2.71522	-4.12978	-3.38198	-2.3523	-3.57605	-2.31708	-0.308101	-2.20421	-2.57638	-4.01661	-1.61857	-0.984474	-1.72868	-3.19509	-3.41459	-3.7601	1.48834	2.68256e-05
CFB	no	no	2.41908	2.69011	2.96806	2.12362	1.52773	3.06382	2.86987	4.73563	4.81379	6.17018	6.5049	6.00212	2.922	4.64857	7.09241	7.34312	1.92236	2.06048	2.91381	4.29657	0.679524	6.3881	4.95304	4.84297	7.1603	5.87791	4.9658	3.45454	7.40072	7.3847	4.06452	5.62476	3.6928	4.52101	2.47391	6.44999e-06
REN	no	no	-3.0499	-3.30559	-2.41431	-1.95705	-3.94903	-2.61085	-3.1755	-3.19792	-3.07745	-1.48274	-3.96122	-2.44311	-2.77194	-3.1082	-0.468452	-2.38344	-3.2781	-2.38791	0.425069	-3.28473	-4.13982	-2.67866	-2.40443	-3.32053	-2.54776	-0.505742	1.97861	-1.10688	-1.05282	-2.85817	-3.32253	-2.82746	-2.05885	-3.58847	0.607188	0.12837
ADA	no	no	-3.80457	-3.52057	-4.0175	-3.6861	-3.56548	-3.84905	-4.23374	-3.63452	-3.23844	-3.15127	-1.84972	-0.536017	-3.75009	-3.90167	-1.31709	-2.37543	-3.7995	-2.42765	-2.60308	-4.36477	-3.31035	-3.85846	-3.65084	-0.643571	-2.56326	-2.06607	-4.14657	-3.5376	-4.13239	-3.50684	-3.5577	-0.629991	-3.61654	-3.76052	0.970842	0.000443014
CA1	no	no	1.73799	1.23165	1.73031	2.71337	2.97029	2.39581	1.80565	2.017	6.50517	5.78767	2.05168	5.0681	0.878013	3.34358	3.81459	1.95121	1.87042	4.81872	5.72198	4.64426	5.25301	3.10748	6.02429	5.27154	5.1474	8.36129	3.19113	3.38907	1.38441	2.93212	6.05312	5.08642	4.8972	6.55041	2.61778	1.24426e-05
CA2	no	no	-0.458971	0.099441	0.350992	-0.929823	-0.446155	-0.137933	-0.757528	1.54429	2.73742	3.18384	0.190682	3.08516	0.874432	0.662063	0.130983	0.805939	-1.23372	0.984855	1.36964	0.949993	3.81844	0.582952	3.54575	2.65725	2.87362	5.65693	0.37867	1.12382	0.525877	1.34741	1.17927	2.14493	0.858428	1.62286	2.30867	1.36324e-05
ASS1	no	no	-2.32118	-2.39903	-1.87689	-1.78987	-2.23736	-2.03499	-2.36144	1.78206	1.92083	-0.352081	-2.08317	-0.0590651	-1.28168	-1.9294	-0.447133	-0.743936	-2.21412	-2.19949	-0.607111	-1.60173	-1.78389	-0.379764	-0.325022	-2.34132	-0.859738	-1.25828	-1.18705	-0.579334	-0.281345	-0.0248592	-1.03069	-0.267811	0.302196	-1.14718	1.18389	8.82347e-05
SPINK1	no	no	2.26872	5.50448	3.02978	5.787	0.0756695	4.50997	2.63246	4.60305	5.11107	3.99375	1.98394	3.75244	5.34968	5.33403	3.47307	1.36494	6.13505	1.18941	4.86895	7.38953	6.46581	3.38389	4.70506	6.60598	3.1916	6.3834	4.29119	8.43556	1.64438	2.11364	4.87056	8.7931	4.88506	4.41102	1.21844	0.238176
SERPINC1	no	no	4.04252	0.962251	4.6743	1.20256	3.07875	2.31449	3.2367	6.81726	7.46065	7.94945	7.67326	8.32812	6.51083	6.65869	8.01736	9.46347	4.92257	4.95675	6.59254	6.0369	3.16294	8.54162	8.16315	5.28907	8.60508	7.57758	7.28161	4.74708	8.44488	8.48955	7.65646	6.09824	8.06849	8.67345	4.35129	0.000118527
SERPINA1	yes	no	4.6588	4.8758	4.99923	2.29654	1.66806	2.05816	5.51537	8.34148	9.29953	9.76541	9.37648	10.8302	7.16038	8.3635	10.3614	10.2115	5.32722	6.66749	7.89053	7.3043	6.13954	9.42912	9.95649	8.36627	10.7453	10.3802	7.77325	8.20136	10.4586	9.88877	8.14653	8.57661	9.36461	8.86738	4.93977	0.000407986
SERPINA3	yes	no	5.9745	6.00449	6.42837	5.5966	6.10544	6.18033	6.38248	7.76301	8.72143	9.26757	7.9648	5.9373	6.70077	8.88749	8.67108	9.8138	5.49753	6.42271	9.23045	7.49447	6.72554	10.0362	8.51709	4.41112	8.69353	9.97099	7.93098	8.33339	9.07457	9.04871	8.31303	5.17547	9.97939	9.08404	2.1103	7.43015e-05
AGT	no	no	2.82365	4.9364	2.21982	2.34018	1.28839	3.73782	1.94217	6.16286	7.57475	7.13605	6.79553	7.79709	2.92528	6.02161	9.68049	8.43824	-0.488711	2.78039	6.31927	3.99369	1.20174	7.52497	7.59961	3.96718	8.95228	6.62213	6.24349	5.35256	9.38393	7.75516	7.57336	6.26069	7.07307	6.49195	3.39184	5.70145e-06
A2M	no	no	2.13866	1.13916	2.54681	0.670539	0.502484	-0.43878	0.591736	4.83141	2.81169	5.97409	6.12822	6.11315	2.98126	2.74129	6.47624	6.61235	-1.54953	1.02359	1.37154	3.81488	-1.10714	5.99241	6.30282	3.18129	6.2872	4.29152	3.41333	0.416458	6.36837	5.94079	2.84102	4.78695	5.2514	5.34918	3.22356	6.77176e-06
C3	yes	no	3.39908	4.49231	4.5289	6.06438	4.13001	4.50497	4.67824	8.47439	7.58872	8.91559	9.52087	9.92017	5.30549	6.2827	10.6633	10.8839	2.56713	5.3544	6.16486	7.1917	3.42252	10.2604	8.98655	5.42709	10.1145	8.75197	7.1807	4.73193	10.3357	10.6843	7.93389	9.38738	4.89726	6.88944	3.38945	7.30345e-06
C5	no	no	-0.124036	-0.93015	0.56501	-1.16536	1.20616	-0.901175	0.0900076	3.65987	2.61327	5.24202	4.66032	5.74554	0.531842	1.83197	6.61571	6.73358	0.584078	-0.0130337	0.822408	2.3141	1.66628	5.64085	4.41946	0.545296	5.03172	3.20979	3.12487	-0.437765	5.55314	5.78815	2.38004	5.17703	-0.906191	2.98504	2.21406	0.000154369
TIMP1	no	no	-0.339152	0.688526	0.526923	1.11382	1.15194	0.857554	1.02103	2.11837	2.03707	4.04992	3.67888	4.26307	1.92889	3.08847	1.80864	3.90375	1.27509	0.168609	0.870902	0.259204	-1.29281	3.65987	2.51355	2.77166	3.28938	5.39187	2.02886	3.23205	3.81058	4.53371	3.24814	2.04004	3.09211	2.47397	1.85607	0.000412777
CST3	yes	no	2.22033	-1.51379	0.465402	2.97725	1.13684	2.5234	2.80891	5.74931	5.11865	5.32931	3.09418	4.34622	5.01782	6.02613	3.00025	3.84311	3.25194	3.07889	5.03472	5.47996	4.28465	4.65993	4.50901	6.91055	3.46434	4.50879	5.42751	5.86196	4.24569	3.85242	5.60212	5.98381	4.66603	4.75808	3.32198	0.00188655
CST4	no	no	-2.67543	-0.658203	-1.76243	-1.08519	-2.0517	-2.57775	-2.44133	-0.0244883	1.62714	-0.641318	-2.15399	-2.41242	0.17951	-0.337516	-2.15448	-2.79159	-0.661453	-0.542042	0.533108	0.0929977	-1.0385	0.614245	-1.49615	0.311659	-2.03213	-2.42176	-1.14996	0.751755	-1.84564	-2.28903	1.76118	-1.48109	-0.398023	1.18429	0.899919	0.0348024
CST1	no	no	-3.7098	-3.37892	-3.1916	-3.65441	-4.15004	-2.84396	-3.8348	-2.0417	-1.6512	-3.78913	-3.90362	-3.5931	-1.92032	-3.55355	-3.80936	-3.15775	-3.78744	-3.32906	-1.65349	-3.7412	-3.50898	-2.86054	-3.13622	-1.83405	-4.18817	-1.37848	-3.55133	-0.501498	-3.56298	-3.59945	-2.22195	-4.4301	-4.0542	-2.82882	0.704075	0.0208598
CSTA	no	no	4.19129	4.11309	1.27954	6.93873	4.87727	8.0271	3.79387	5.20213	6.26898	5.63998	3.98699	4.58453	7.10138	6.51736	3.06711	2.69562	5.76447	4.76094	6.26779	6.17433	6.60757	6.6566	4.96988	6.65557	3.25687	5.37064	5.0345	6.47233	3.38997	4.24977	4.73025	4.82574	6.36097	4.94705	0.497096	0.645471
KNG1	no	no	7.6375	7.84554	3.77941	7.67623	7.48234	7.57522	8.14082	10.0057	9.09594	9.36211	9.22539	7.8285	10.6035	10.1411	9.21483	9.5465	9.07825	9.19452	9.62396	8.50688	9.2196	9.65087	10.457	7.78096	9.58795	8.77321	10.1236	9.30836	9.68483	9.24511	9.18808	8.02121	10.4785	10.0055	2.41779	0.00673845
NRAS	yes	no	-2.20353	-2.12798	-2.45119	-1.8166	-1.95223	-0.375551	-1.9729	-0.161714	-0.585076	-0.915496	-0.548586	-1.02611	-0.264736	-1.0962	-2.80968	-2.594	-0.643607	-0.203001	0.397449	-2.4927	-0.32657	-1.52183	-1.33841	-1.12417	-3.87257	-1.2187	-1.62558	-0.0299223	-2.09901	-1.3521	-2.06466	-1.02439	-0.222916	-1.61452	0.740291	0.0836036
KRAS	no	no	-3.60288	-3.67313	-3.45375	-3.68614	-3.54662	-1.81633	-3.32852	-1.6924	-2.13779	-2.62859	-3.39202	-2.41009	-1.80462	-2.86147	-3.77819	-3.56419	-4.22887	-3.80417	-3.40849	-3.54392	-0.726676	-2.46631	-2.484	-3.82193	-3.49605	-3.0873	-3.23609	-1.14317	-2.21466	-4.03891	-3.67105	-3.37048	-2.03209	-3.26559	0.36213	0.347836
PDGFB	no	no	-0.677548	1.79574	0.180158	1.4986	-1.37174	1.55886	-0.0668457	1.40316	-0.324021	0.231727	-2.69869	-2.03034	1.31792	1.85333	-1.82123	-1.7917	2.51604	-2.01373	0.592471	1.04497	1.04071	-0.194272	0.0766458	1.49863	-2.26518	1.13599	0.278166	1.97667	-0.850546	-2.80615	-0.384965	-1.25695	0.295336	0.783828	-0.440805	0.502292
LDLR	no	no	-0.433603	1.01304	-0.657769	-0.0925596	-3.14284	-1.08993	-2.89931	-0.747701	1.15147	-0.137074	-3.1696	-1.39346	0.374279	-0.459943	-2.59902	-2.59045	-0.644632	-2.83144	-0.303332	-1.81102	0.254686	-0.759913	-1.55653	-0.573704	-3.7097	-1.6637	-0.538945	0.979247	-1.86477	-2.21712	-0.575408	-1.85044	-0.154853	-1.33263	-0.112736	0.888479
EGF	no	no	2.49945	1.62965	2.5219	3.27046	1.22503	2.73638	2.68139	6.82899	6.36447	5.98004	2.08901	3.69039	6.80826	6.46272	1.75473	4.82681	4.16463	4.65216	6.20908	2.31676	6.08234	6.79304	6.74878	2.18996	5.04828	3.12186	6.73763	6.13311	6.09204	5.90713	5.29033	3.31946	6.02412	5.37956	2.70598	1.41822e-05
OXT	no	no	-4.13908	-4.42065	-3.85857	-4.11122	-4.08884	-4.6496	-4.1094	-4.21243	-4.08273	-1.80145	-3.80238	-3.8335	-4.44983	-3.67497	-4.36802	-4.35482	-4.22806	-4.23933	-3.6756	-2.1645	-3.95326	-3.99671	-4.17105	-3.97746	-4.58547	-1.77577	-4.4266	-1.65309	-4.40792	-4.08292	-3.51481	-2.5834	-3.88693	-4.36078	0.268771	0.316625
PENK	no	no	0.810476	2.28525	0.51984	-0.514426	-0.972368	3.70084	2.24591	2.92444	3.17601	0.372201	-0.784534	-1.17907	3.43721	2.31315	-2.16269	-0.356729	1.60077	0.333737	2.6008	0.923829	1.83408	0.621995	1.66222	1.5671	-0.716103	0.248172	2.94509	4.25075	0.220158	0.0831286	1.7107	1.21778	1.94475	2.54677	0.081009	0.929631
FSHB	no	no	0.000178635	-0.0521572	-1.23066	0.190467	-2.13207	0.294991	-1.68609	-0.636873	-1.17481	0.57475	-2.25445	-1.95254	0.794587	-0.193933	-1.78311	-1.42818	-0.104133	-2.48084	0.24969	0.899037	4.49054	-1.72762	-0.742714	-2.27429	-2.06312	-0.819726	-0.63458	-2.27387	-2.2757	-2.05117	-0.874818	-1.97582	2.38397	-0.440794	0.0812529	0.902978
LHB	no	no	-3.9956	-3.80739	-4.00107	-0.230299	-4.74252	0.439016	-3.96306	-1.86893	-0.716912	-1.66159	-3.64952	-4.5999	-0.23347	-0.926959	-3.62372	-4.61341	-2.47614	-4.3293	-1.60492	-2.87692	0.346072	-2.8595	-2.60633	-5.80545	-3.47175	-0.549426	-4.01555	-1.41805	-2.96376	-3.96339	-2.85462	-3.51774	-1.31634	-4.40321	-0.0478798	0.965059
CALCA	no	no	-2.16552	-1.42445	-3.17744	-0.52654	-3.08607	-0.088362	-0.811625	-0.991538	-0.948032	-1.33149	-3.73454	-3.24404	-0.750835	-0.236988	-3.27592	-1.9142	1.87487	-3.2956	-2.63146	-1.37759	-0.0885023	-3.34501	0.561411	-1.47588	-3.4016	-4.00895	-1.18716	-1.37951	-2.47227	-3.0081	-2.46925	-2.81919	-1.67538	-1.53134	-0.194701	0.775701
NPY	no	no	-4.2488	-4.67857	-3.76586	-4.824	-4.52348	-4.58437	-5.72078	-3.62987	-2.78805	-3.94837	-3.94506	-3.77046	-3.84933	-5.35771	-4.01834	-4.02819	-3.87163	-4.28857	-1.31283	-0.238081	-4.07765	-4.83231	-4.662	-2.16823	-3.9787	-2.4498	-4.47237	-0.705593	-3.80187	-4.77881	-2.80299	-2.5379	-2.40526	-3.75695	0.454936	0.223033
IGF2	no	no	-1.62223	-2.3187	-2.74926	-1.38174	-2.5672	-0.722798	-0.771108	2.02762	2.05966	0.402868	3.03692	0.515381	1.6756	1.72591	2.04353	2.33089	-0.91593	-1.07129	1.78386	3.90456	0.627777	1.77184	0.610069	2.99839	2.39175	2.44973	1.58308	1.4432	1.90916	1.8152	3.50752	2.56557	-1.48011	1.96641	3.18424	5.85637e-05
IL2RA	no	no	2.71524	2.61668	-0.114635	1.98437	-0.634289	2.76689	1.40739	0.358919	-1.74757	-0.747323	-0.989175	-3.08793	2.05556	1.00959	-1.3559	-2.25804	3.91985	-1.02659	1.13666	-1.00318	2.46672	-0.604397	0.643058	0.191331	-0.121181	1.10669	0.107376	2.8119	-0.129078	-1.76997	-0.229453	-1.84314	0.749295	0.173165	-1.55722	0.0443448
JCHAIN	no	no	-2.67855	-2.67001	-3.41619	-0.855663	-2.40096	-1.20399	-0.21982	4.89242	5.45172	5.2023	5.29545	4.98731	3.55921	6.04337	7.18396	5.39976	2.62007	5.90013	4.49943	5.98006	3.06712	5.7051	6.3921	5.29004	6.03167	5.01999	5.65922	4.81854	5.55849	5.9476	5.19362	6.25539	6.92217	5.21343	7.25739	6.45676e-06
IGKV1D-33;IGKV1-33	no	no	3.47459	1.87327	3.24492	4.09889	0.500498	4.96676	4.31048	5.09354	6.36858	6.47324	4.49809	5.82252	6.14322	5.26654	5.03377	5.19913	5.7183	5.91064	7.13987	5.2033	5.22208	6.60161	4.57192	4.69408	4.88305	5.15719	5.54752	5.74516	5.9184	6.22518	7.47156	6.07114	6.68732	5.76361	2.61027	0.00586117
IGKV1-39;IGKV1D-39	no	no	-1.28463	-0.467056	-0.492294	-4.07356	-1.88083	-2.61797	-1.41836	0.300141	2.90598	3.0421	1.49264	2.68226	0.611431	3.11142	2.63798	3.87044	-0.629207	0.214629	3.55293	0.624868	-1.52329	1.37082	1.65359	2.05954	2.50997	2.82181	-0.43694	4.15555	2.75558	2.93578	2.10412	1.38578	2.61521	3.28027	3.87568	5.90867e-05
IGKV1-17	no	no	1.10234	-0.247767	0.999542	-3.11807	1.3201	0.604875	0.945269	2.07595	3.73519	3.59116	3.47117	4.34582	2.02661	3.37941	3.81202	5.20924	0.278808	2.8962	3.7717	2.01891	-1.4973	3.54063	4.61478	3.57156	5.25896	3.48061	2.20232	2.72345	3.89246	4.79106	3.47349	3.97817	3.02871	3.96811	2.91903	0.00575428
IGKV1D-16	no	no	-0.7352	-0.583905	-0.860214	-0.833014	-0.86165	-3.60812	-1.05869	0.390317	3.07663	1.59976	-0.423989	1.7617	1.11481	1.76713	1.89506	2.49999	-2.21439	0.625409	2.95326	0.161595	-0.979497	0.944274	1.23472	0.815251	1.70266	1.48862	0.529791	1.85542	1.84663	1.73526	2.38792	1.6369	1.54989	2.25814	2.37077	0.00168418
IGKV1-5	no	no	1.62858	2.0312	1.27647	-1.70422	1.38989	0.736868	1.56443	2.97382	4.91296	5.06073	5.19128	5.65878	2.48202	4.41467	5.48336	5.88018	1.68756	1.66015	4.31362	2.53868	0.620528	4.27776	3.90556	3.63617	5.17869	4.58868	2.38265	5.15803	4.95392	4.33227	4.47353	4.61399	5.21549	4.94629	3.46604	6.82526e-05
IGKV3-20	no	no	1.05578	4.13204	3.3608	3.04082	0.330032	2.51597	4.24435	7.0516	9.43534	8.15457	7.57081	8.57338	8.23911	8.49352	8.1522	7.46749	5.64575	6.9571	9.59468	8.59302	6.45787	7.86212	7.74646	7.64975	7.93736	7.61371	7.59263	9.95526	8.28363	7.87965	9.4917	8.74221	8.72133	8.56607	5.40652	0.0001413
IGKV3-15	no	no	2.24527	1.92446	1.04622	3.87481	1.62432	5.05088	0.0529014	7.231	8.0702	7.48146	5.92515	7.53589	7.56934	7.57866	7.71503	8.44365	6.22252	6.49899	8.07773	7.96581	5.96154	6.3578	7.05704	7.15779	7.90822	7.89908	7.88737	9.14299	7.93151	8.21435	8.41869	7.47114	6.95643	7.55238	5.23023	0.000397417
IGLV1-47	no	no	0.146315	-1.13112	-0.713541	1.67418	-1.04579	3.53703	1.16612	2.82748	3.85722	3.99019	3.83211	2.95197	4.09753	4.88012	5.60549	5.55376	0.870248	3.68597	4.3857	7.01235	1.94406	3.65645	4.05021	2.91029	4.82471	4.58307	2.99951	5.07025	6.11289	4.01868	4.75392	3.78639	4.38329	4.37009	3.6067	0.00205295
IGLV1-51	no	no	0.435237	-1.56981	-1.45799	2.78553	0.298703	3.80688	1.02104	5.82574	4.09159	3.55072	3.26873	4.14264	5.88259	6.70822	6.08468	6.73874	3.50737	2.27967	6.07226	6.17121	3.40969	3.78091	7.73464	4.75874	7.96109	3.07643	5.81268	6.35981	6.09362	5.8408	6.73543	7.57517	5.50129	5.67708	4.50205	0.0015444
IGLV1-40	no	no	1.86741	1.18834	1.11745	1.38145	2.57477	1.71193	0.605411	0.311379	3.18763	4.09339	4.36035	3.24355	-0.50526	3.59039	3.63129	4.01138	2.09239	1.22924	3.40098	2.75218	0.974308	3.23836	2.99597	3.80933	3.46279	4.09873	2.09389	3.59974	0.784825	1.75388	2.75319	3.48436	4.22002	3.27183	1.39442	0.000211602
IGLV2-14	no	no	-2.21439	-3.61958	-3.7751	-1.95209	-2.25247	-1.86402	-2.81053	1.54448	-1.73385	-1.57779	-2.16484	-1.25616	1.14533	-3.10678	1.78497	5.02442	-1.0613	2.11145	1.24806	0.208169	-1.47843	3.1188	2.96839	2.87345	-2.44124	2.6051	2.11009	-2.94427	-2.91442	0.92191	-0.602503	3.70321	3.57529	3.56441	2.64872	7.52476e-05
IGLV2-11	no	no	-0.739577	-1.84698	-0.946854	-0.617163	-1.24716	-0.878552	-3.35419	0.971429	4.84291	3.48025	3.45727	5.00598	2.24047	3.52423	2.95278	4.77198	-1.48638	-0.319349	-5.03172	3.96502	-0.0861906	3.42594	2.97876	3.33308	1.86522	2.73085	0.818374	4.03722	-3.4248	-1.75649	4.51574	3.52044	0.555623	3.26814	3.35626	1.22502e-05
IGLV2-8	no	no	-0.219092	-0.921829	-1.34737	-0.85607	-0.0627621	-0.220119	-1.02637	0.737378	5.00253	2.34698	1.8391	3.60885	-0.182718	2.68856	1.94292	3.73071	-0.37993	0.0550354	-0.00861304	3.25007	-1.115	3.82288	4.00036	2.2106	1.73587	1.97222	-1.67105	2.55641	-0.798088	-1.72092	3.50924	2.89318	3.39353	3.37252	2.06017	0.000106537
IGLV3-19	no	no	0.437689	1.44712	0.0604254	-4.12393	-0.203149	-2.14373	-0.0142715	2.80928	4.21693	4.00274	3.96849	3.99324	2.05559	3.70741	3.80461	4.45811	0.332431	2.01358	3.43703	3.93073	-0.892177	3.46104	3.62696	4.10001	4.22638	3.1149	3.38173	5.20962	4.61388	4.3904	4.3025	4.49461	3.4502	2.4901	3.97851	0.00213853
IGLV3-1	no	no	-0.0875034	-1.65691	-0.264688	-1.78014	0.182877	-0.818086	1.63944	2.86055	4.42625	2.55013	2.9786	3.55825	2.38364	2.89918	3.17339	4.08535	1.50656	2.06904	3.87625	2.89647	-0.235215	2.21011	2.92007	2.56725	2.30842	3.37681	2.50202	5.40724	2.55462	3.80372	2.61414	3.93008	3.13608	2.26896	3.34119	7.53286e-05
IGLV3-25	no	no	0.0878304	1.0829	0.687689	1.00329	0.940904	-2.529	-4.0375	3.52596	5.26598	5.11884	6.19489	5.83231	2.95156	4.81164	4.78663	5.90766	1.2959	3.24341	3.95647	3.7344	1.59418	4.48884	4.49967	4.41274	5.32684	5.6639	3.53284	5.26543	5.16001	5.6213	4.44462	5.79965	4.81475	3.99773	5.02478	0.00105812
IGLV3-27	no	no	-1.616	-2.0577	-2.5391	-1.31988	-2.18184	-2.38491	-1.5572	-3.0763	1.13292	0.403226	2.71136	2.18657	-2.20439	-0.300643	0.505931	2.79027	-2.34867	-3.27165	-1.55293	-0.501591	-1.48002	-0.364795	2.19328	-2.04657	1.35809	0.8757	0.342086	-0.529683	2.95032	-2.20876	-0.0202735	0.480498	0.865706	0.239859	1.71153	0.000158674
IGLV6-57	no	no	-2.78542	-3.0731	-3.17912	-2.79881	-3.21854	-2.67814	-3.01814	-2.84895	-1.36175	-3.27598	-1.64246	0.449425	-1.95025	-1.41425	-2.03985	-0.41222	-3.03399	-3.03955	0.089035	-2.80993	-2.52589	-0.153588	-1.28135	-3.71231	-2.57207	-0.5204	-3.003	0.10208	0.52109	1.29608	0.47794	-0.670869	-0.365984	-0.130135	1.84981	1.51517e-05
IGHV1-69	no	no	1.99121	0.944474	0.908755	1.56434	0.970573	1.38445	0.306423	2.34245	2.68199	2.86177	4.35834	4.9803	1.86849	3.45789	4.71685	5.81301	-0.494419	2.02796	2.33479	1.46368	-0.469943	3.78586	4.36749	3.21907	4.70864	4.21849	3.30773	1.74892	5.06723	5.15864	2.11362	3.71883	3.10977	3.97809	2.08386	1.64138e-05
IGHV1-46	no	no	-1.01642	-0.452351	-0.650789	-0.274887	-0.935642	-1.02929	-0.919659	0.0797748	0.799653	0.971643	1.18494	2.17423	-0.926427	1.06951	2.40594	3.6658	-2.22043	-0.949334	0.393412	-0.188483	-1.25242	1.91669	1.57308	-0.632796	1.66417	2.05359	-0.0619741	-1.09536	1.87544	2.52856	0.917266	0.840656	2.13145	1.50875	1.73958	4.69384e-05
IGHV3-11	no	no	-4.3704	-4.43599	-4.13372	-4.11519	-4.15861	-4.36008	-4.70778	-4.13879	-2.96447	-2.8777	-2.41451	-2.19676	-3.87841	-5.08226	-3.6274	-2.92189	-4.62989	-4.16891	-4.23506	-4.39209	-4.6195	-3.70161	-3.76069	-4.33397	-4.20499	-4.39313	-4.41678	-4.36789	-4.60589	-3.56039	-2.76423	-2.63577	-1.8303	-2.68434	0.638116	0.00555244
IGHV3-23	no	no	-1.60511	2.35276	2.01042	-2.25254	0.669895	-1.60007	0.665683	4.7959	5.01385	5.66034	6.47157	6.6716	4.0601	5.18356	6.65189	6.83866	2.92299	4.0984	4.85441	5.50577	2.84463	5.77475	6.28379	4.09399	6.77008	5.41729	5.87717	4.46014	5.99038	6.07117	5.13012	6.28391	5.80427	5.70638	5.17424	0.000735664
IGHV3-13	no	no	-0.537506	-0.0533919	-0.709604	-0.925209	-1.85408	-0.450776	-0.707411	0.358668	0.848675	2.629	2.06039	1.65933	-0.501074	1.2446	3.47135	4.12482	-1.71532	-0.239335	-0.160989	0.951261	-2.73824	1.3045	1.95983	-0.453617	3.22924	2.44218	1.03911	-0.869132	2.63248	3.08174	1.7294	2.19105	3.47029	2.22478	2.4278	6.37408e-06
IGHV3-30;IGHV3-30-5	no	no	-3.04131	-3.08414	-3.01179	-2.32311	-2.90179	-2.27817	-2.24421	-3.23487	-1.60052	-2.24221	0.851663	-0.00662925	-3.11666	-2.39811	-1.41011	0.768086	-2.74808	-2.82571	-3.08373	-2.28767	-2.94653	-3.05441	-1.55677	0.0527473	0.909063	0.140366	-0.687794	-2.67474	0.964683	2.16916	-0.614893	0.158325	-1.77984	0.378261	1.94031	4.32522e-05
IGHV3-33	no	no	-1.09914	-1.09981	3.04799	0.0874297	2.64667	0.509395	0.759038	6.78476	7.11554	7.52324	7.94021	8.11059	6.05169	7.2506	7.94968	9.44765	4.70394	6.42813	6.68344	6.86865	4.81977	7.96571	8.06214	6.71297	8.78833	7.58659	6.95635	5.95076	8.24751	8.11602	7.21195	7.71936	7.52708	7.94978	6.4657	0.00016216
IGHV3-7	no	no	-3.07224	-2.16151	-0.45722	-0.892861	1.61675	-0.0593561	2.11467	5.52086	6.08647	6.80183	6.35389	7.14839	5.12999	7.15501	8.01695	7.79373	2.53052	4.01424	6.2173	5.97139	4.59633	6.65735	7.09814	5.3648	7.50047	6.92308	6.2855	5.05524	6.94233	7.83807	7.31878	7.98432	6.82599	6.95996	6.59048	0.000179956
IGHV3-9	no	no	0.158542	-2.63125	0.546909	-2.31512	1.747	-0.937061	-0.484947	5.58488	5.04435	6.15136	6.07036	7.13024	5.27136	5.97681	4.85488	8.20095	3.02158	5.23811	4.98271	5.35867	3.23543	6.67659	7.2619	4.23041	7.48737	6.86304	6.3337	4.70873	7.39561	7.67862	6.21439	6.74195	7.37887	6.59564	6.44832	9.48829e-05
IGHV2-70	no	no	-3.97414	-4.41868	-3.916	-4.48653	-3.92787	-4.1413	-3.88056	-3.19585	-2.20025	-2.39723	-5.41363	-2.60799	-3.98532	-4.68602	-2.94767	-1.26758	-4.2224	-2.52083	-3.70048	-4.67395	-4.88162	-1.36015	-3.02456	-4.88863	-1.10509	-1.29153	-4.26699	-4.68033	-2.08767	0.307167	-1.55242	-2.52085	-2.17633	-2.37213	1.19443	0.000743803
IGHV2-5	no	no	-3.66869	-4.99561	-3.79817	-3.88153	-3.77727	-4.22023	-4.67918	-5.06955	-2.52034	-0.194544	0.751281	0.627981	-2.33443	-3.26756	0.482315	0.301484	-3.66306	-3.81352	-3.43086	-3.68776	-3.99205	-1.43364	-1.08184	-4.8071	0.0282451	-0.158096	-2.91828	-3.07441	-1.66187	-0.0543254	-0.393926	-1.25102	-1.31572	-1.92249	1.73925	0.000164142
PIGR	yes	no	0.00938387	-0.735934	1.37997	1.47333	-1.19183	0.469408	0.34132	6.4487	6.48216	5.49317	2.53203	5.86133	5.85982	7.57107	6.41798	4.35767	6.20447	5.50067	6.32247	5.33376	4.92655	5.4829	5.78369	6.20713	5.0408	5.61646	6.71096	7.05396	5.83414	4.93385	5.77756	5.89133	7.00322	6.10745	5.50248	1.38492e-05
IGKC	no	no	0.582438	2.67012	1.85954	3.46825	1.96393	4.46549	2.52762	9.32923	10.4775	10.3459	9.9905	10.0212	9.55701	9.90545	9.90786	10.2456	7.43026	9.4048	10.1675	10.0473	8.31846	10.0939	10.1287	8.96336	10.3829	10.0004	9.42897	10.3523	10.0143	10.3566	10.7979	9.77009	10.3291	10.4767	7.35554	1.69837e-05
IGHE	no	no	-3.03348	-2.42055	-2.53853	-3.12773	-3.21769	-3.14079	-3.01646	-3.27468	-3.38442	-2.17417	-3.26034	-3.03571	-3.58509	-3.12519	-2.76733	-2.99976	-2.9618	-2.99488	-3.5197	-3.38197	-3.46402	-3.11984	-2.94768	-2.08839	-1.56527	0.144156	-3.8876	-2.63172	-3.2149	-2.97435	-2.82708	-3.10965	-3.10718	-2.89311	0.173264	0.412716
IGHG1	no	no	6.49792	6.37436	6.82335	2.96835	2.44789	3.50857	7.16968	8.56402	9.41418	10.4476	10.3259	10.0015	9.19052	9.18059	10.3223	10.8332	7.58211	7.78486	8.25156	8.40903	6.17425	10.4402	10.0355	8.14051	10.6051	9.50509	8.67651	6.81995	10.2569	10.4073	9.64065	9.52406	9.03769	10.1763	4.61155	0.000485575
IGHG2	no	no	3.02029	2.97	6.24946	4.52277	3.62941	3.91361	4.69203	9.21158	9.70648	10.6418	10.286	10.5995	9.31029	10.0263	10.9802	10.8215	6.9448	8.24231	9.51018	8.35723	8.0312	10.8295	10.3515	8.06953	11.1914	10.4575	9.47866	7.94435	10.8275	11.2927	10.6318	9.29132	10.5993	10.8839	5.72229	4.71757e-06
IGHG3	no	no	3.2078	2.43037	2.40352	3.00011	2.88349	3.55522	2.8176	5.69898	6.14861	6.59081	7.7976	5.98619	3.49368	5.77543	7.42945	8.10277	-0.0628324	1.72122	4.58963	4.69902	-0.219276	7.07942	5.98691	6.36836	7.58998	5.05978	5.20186	3.42683	6.74524	6.31528	5.99008	4.84224	4.03044	7.2113	3.01591	5.70145e-06
IGHG4	no	no	2.25795	2.21827	2.39728	-1.09423	2.90527	2.33025	0.227399	4.51508	3.95589	7.41792	7.66165	7.1376	4.45978	4.12433	5.88012	4.48259	0.405379	4.36742	5.43956	4.98521	1.2343	6.37546	5.75491	4.15469	7.33277	7.22916	4.42288	-0.178064	7.14975	7.46251	8.02591	3.95686	8.27109	7.11431	3.66849	0.00138928
IGHM	no	no	3.78253	3.27976	2.93744	2.549	2.05783	-0.975755	3.62291	6.65205	6.27052	8.04661	8.29439	7.17225	5.47955	6.22106	8.64488	8.08721	0.169396	4.763	5.15986	8.84108	1.95169	8.31074	9.50109	5.53555	9.34809	6.92338	4.89209	3.89802	7.62831	8.50819	6.9925	8.28197	5.48276	8.3008	3.96935	0.000798108
IGHA1	no	no	0.747451	-0.752503	1.44747	1.75859	0.388629	0.71549	1.5393	7.75566	7.42582	9.077	8.48426	9.00854	7.50715	8.36628	8.67222	9.26317	4.59827	7.35718	6.50843	7.25648	5.1983	8.47097	8.47307	7.08595	9.33607	8.22043	7.37474	6.32445	8.50436	9.18704	8.04228	8.95244	8.99503	9.07459	6.85977	7.92481e-06
IGHA2	no	no	5.69767	4.80705	4.19268	1.66849	5.29283	4.47161	5.4829	7.39904	7.43432	9.66408	9.11576	10.2595	6.87734	8.64587	10.3537	9.86758	4.53088	6.902	7.0995	6.95454	4.84005	8.51721	8.86838	6.58868	10.2499	8.83549	7.22401	6.62155	9.2297	10.078	7.44388	9.30172	9.57547	9.83277	3.57889	0.00054079
IGHD	no	no	-0.506628	0.690798	0.621172	0.0217306	0.914719	-0.969952	-0.688252	2.61596	4.69562	2.03627	3.93054	-0.167855	0.483119	0.896091	4.10341	7.60999	-0.67286	0.534595	0.401619	0.108539	0.510559	1.74171	2.71764	1.76556	5.42784	0.627632	2.11027	-0.0126556	0.677447	4.8465	1.9213	2.06229	1.90395	2.77313	1.7558	0.00160238
HLA-B	yes	no	-0.527143	-0.909476	-0.536965	-0.654375	-0.503193	-1.41013	-0.387101	1.79719	2.89004	0.20146	0.0124029	1.54609	0.848817	0.777	1.16155	1.02501	-1.69931	2.17438	2.46475	0.864365	-0.445577	1.00689	0.194849	1.40823	1.21401	1.81856	1.02785	-0.0782792	0.953124	0.00307439	1.11072	0.284588	0.628335	0.132327	1.47124	1.91312e-05
HLA-DRA	no	no	-3.75743	-3.83114	-5.03058	-3.54697	-4.37177	-3.7947	-2.97047	-2.63241	-2.07852	-3.04979	-4.72462	-1.58546	-4.16094	-1.9833	0.0289536	-2.40208	-3.51109	-4.04627	-0.735042	-2.42342	-2.59535	-5.01919	-2.34417	-4.44124	-4.0709	-2.68691	-3.19639	-0.721311	-1.77026	-1.55484	-3.22386	-3.51114	-0.561316	-3.03534	1.40758	0.000761335
HLA-DRB1	no	no	-2.88676	-2.44399	-3.37951	-2.57595	-3.13652	-2.93507	-2.86788	-0.976839	-1.39743	-0.902711	-2.75057	-0.945928	-3.10071	0.246125	-0.0383004	-3.96838	-3.40088	-1.82874	-0.421038	-1.17907	-0.795182	-1.63437	-1.02841	-0.551813	-2.29737	-3.4379	-2.15905	-0.0686049	-1.00788	-2.0139	-3.16092	-1.51164	-1.19988	-3.01187	1.03738	0.000832934
HLA-DQB1	no	no	-2.75007	-0.51382	-2.06446	2.39829	-1.54989	0.557846	-0.757548	-1.82895	-1.284	-0.901429	-1.36511	-1.67467	-0.716295	-2.09897	-1.78604	-1.44453	-1.49526	-2.35135	1.43575	-2.58578	-1.12601	-1.88347	-1.60593	-2.48855	-1.22355	-1.17998	-0.135505	2.32925	-1.82246	-2.09327	-0.517498	-0.945003	0.780954	-1.81054	-0.584854	0.490546
HBD	no	no	1.44514	1.6078	1.83674	-0.708803	0.805086	1.05203	1.45623	2.27482	4.46222	6.58672	3.10741	5.51602	0.122111	3.11946	3.15549	2.71591	0.826064	3.49863	2.78267	2.99595	5.06589	-0.440733	6.23848	5.78051	6.26674	8.81647	2.42383	-1.91968	0.396106	2.71602	2.8284	5.63108	1.07426	6.46397	2.95241	9.02583e-05
HBE1	no	no	#NUM!	#NUM!	#NUM!	#NUM!	#NUM!	#NUM!	#NUM!	#NUM!	#NUM!	#NUM!	#NUM!	#NUM!	#NUM!	#NUM!	#NUM!	#NUM!	#NUM!	#NUM!	#NUM!	#NUM!	#NUM!	#NUM!	#NUM!	1.89353	#NUM!	#NUM!	#NUM!	#NUM!	#NUM!	#NUM!	#NUM!	#NUM!	#NUM!	#NUM!	#N/A	#N/A
MB	no	no	-3.43593	-3.97292	-3.45212	-3.39494	-4.02197	-3.64548	-3.93979	-3.65959	-1.31288	-2.95443	-4.405	-2.04937	-3.79947	-3.54538	-1.90655	-3.55465	-3.63532	-3.99614	-3.25737	-3.93791	-3.59066	-3.65017	-3.68538	-2.39237	-4.12033	-1.28601	-3.5001	-3.44104	-3.33295	-3.64688	-0.449313	-4.22054	-3.16115	-3.76264	0.339103	0.177508
COL1A1	no	no	0.684839	0.509692	1.06693	2.90091	0.615668	3.25103	0.424515	4.26952	2.75295	2.44383	1.11291	1.51755	4.42793	3.44908	0.900173	-0.316277	3.08857	1.17228	2.91772	5.39062	2.97974	1.87457	2.32363	3.9058	0.441561	3.28881	3.49512	6.00163	2.20343	-0.396959	3.43224	2.60326	3.15232	2.94103	1.1546	0.0614563
COL2A1	no	no	-1.3285	-0.86177	-1.79541	-0.634226	-2.33436	2.15236	-1.34387	1.25834	-0.41766	0.273823	-2.35111	-1.31397	1.52835	0.415464	-1.57553	-1.50263	1.93335	-0.900079	-0.733781	-0.541799	0.586498	-1.15611	0.0183539	-1.92252	-1.49934	-0.253259	1.00538	1.129	-1.62868	-1.03574	-0.348606	-2.00431	0.570084	0.436315	0.583311	0.410366
COL3A1	no	no	-1.227	0.76133	-1.66019	-1.69102	-2.26392	-1.60797	-2.95897	-1.39532	0.826191	-0.143839	-0.520149	-0.365165	0.668468	1.08128	-3.69004	1.49276	0.073449	-2.05699	-0.624568	0.906217	0.346318	-0.473679	-0.459825	1.97287	-2.36497	1.44123	-1.17508	4.39272	-2.66572	-2.32745	1.93976	1.25736	1.34035	-0.463961	1.94088	0.0122945
CRYAB	no	no	-3.61352	-2.93289	-3.13361	0.802933	-3.08687	-1.2301	-2.9311	-1.65407	-1.28402	-0.483512	-3.36695	-1.66313	-2.89739	-1.90137	-3.22848	-2.56151	-3.70387	-3.28053	-2.11097	-1.31966	-2.82242	-3.00334	-3.15476	-2.22029	-3.71092	-0.464509	-2.92771	-0.225479	-1.86685	-1.67622	-3.00813	-2.77297	-2.83922	-3.34034	-0.139685	0.858974
KRT14	no	no	4.66265	0.794651	1.6858	3.1992	3.10898	4.27006	3.37698	5.84971	3.82904	1.76073	1.30025	2.46558	5.43798	3.92549	3.02669	2.03867	5.40377	5.17735	1.96635	2.55019	5.85389	3.52249	1.98518	2.0653	2.18235	2.35207	2.5673	1.75156	2.89788	3.67134	2.52428	1.90959	1.20717	2.0468	-0.0937512	0.893472
KRT6A	no	no	3.31252	1.602	1.39773	5.08504	4.91036	6.01895	2.50004	5.359	5.21185	2.64861	2.25303	2.70535	4.96106	6.64663	2.56241	1.86933	4.29396	4.50031	2.39846	2.37535	5.16872	6.66893	1.54914	2.15122	3.52673	2.41859	3.12909	1.96533	3.03939	5.15636	2.54086	1.37724	2.99702	2.57705	-0.119363	0.906138
LMNA	no	no	-3.06238	-2.90461	-2.17158	-1.79671	-3.22438	-0.417791	-2.1665	2.01588	1.75137	-0.426678	-1.02196	-0.900528	-1.0941	-0.604749	0.394062	-1.18226	-2.21084	-2.43917	-2.45291	-1.72128	-1.83615	-0.723186	-1.91454	0.12403	-0.184621	-0.458518	-1.78425	-2.25298	-1.13564	-0.233278	-2.81063	0.00738041	-3.11546	-0.663561	1.02919	0.0405316
SPTA1	no	no	-2.97998	-2.50252	-2.74325	-3.06284	-2.95744	-2.90366	-2.80765	-3.1824	-3.37548	-2.29884	-1.48824	-1.19583	-2.63362	-2.42103	-2.73141	-2.81202	-2.80524	-2.62875	-2.68069	-2.86439	-2.98166	-3.01383	-2.25374	-2.04494	-1.10247	-1.5402	-2.98936	-3.05771	-1.21691	-2.58011	-3.11783	-2.90184	-2.3727	-3.31668	0.392049	0.0139033
APOA1	no	no	4.10543	3.90276	4.37953	3.88481	4.44553	-1.20274	3.0693	9.65255	8.31581	10.3372	10.4702	9.26254	7.38483	7.52083	10.9376	10.6149	3.69899	5.94961	6.1299	7.11544	2.76531	9.01495	8.82748	5.74904	9.35275	8.27407	7.94788	6.82105	9.01412	9.76631	8.52561	8.39125	7.80927	8.5809	4.59323	0.00191281
APOE	no	no	-1.92582	-1.20526	-1.0332	0.287821	-0.629093	-2.94136	0.583489	2.96389	3.03826	3.76962	3.82519	3.46979	1.2774	1.9262	5.7203	4.14418	-1.71518	0.209049	1.37474	0.823546	0.686295	2.592	2.24872	1.763	4.1575	0.794058	2.31816	2.58881	1.80489	2.93359	1.28332	1.53902	1.27504	1.10697	3.1406	0.000171106
APOA2	no	no	-0.68409	-0.679893	0.251888	-1.2953	0.0171105	-0.123015	-1.07289	2.02424	0.832769	3.65796	5.50266	1.55365	1.45642	1.29992	5.91611	3.45546	-1.35635	-1.84398	-0.0808578	1.07145	-1.21376	3.188	3.68897	2.58292	3.90743	3.00191	1.18909	-0.419151	2.58736	3.9568	0.947433	2.24289	2.61924	3.79121	2.53649	3.05098e-05
APOC1	no	no	0.0623388	-1.0652	-0.398063	-1.56383	-0.261584	-1.05146	-0.498646	0.989662	2.48861	4.55477	5.37885	4.66323	1.825	1.39768	7.7225	6.07595	-1.78512	-2.17527	-0.556481	1.99859	-0.318215	4.25357	3.6536	1.55773	4.33368	1.81585	1.70786	-1.13759	2.34595	3.68144	1.43391	2.93844	0.689452	2.64663	2.92045	2.83558e-05
APOC2	no	no	-0.445929	-0.429788	-0.866975	1.58573	0.694259	1.69415	0.05479	3.65788	2.90826	4.84091	5.02749	1.1847	1.17626	4.03046	7.31153	4.90417	1.39102	-1.40049	1.90461	4.19281	1.26182	4.49709	5.69699	2.52176	4.5006	4.46124	2.32634	5.02384	3.34197	4.06006	1.37592	3.77691	3.74877	4.55458	3.03085	9.10717e-05
APOC3	no	no	-1.15415	-2.02432	-1.56283	-0.743069	-1.30797	0.9444	-0.529051	4.98871	2.7501	6.87028	6.89463	2.72353	2.62013	3.75783	8.79791	7.64463	-1.82386	-0.715181	1.26363	5.90622	-1.07476	6.54598	4.82066	5.90777	6.52025	4.77376	2.5005	2.89415	5.37971	5.35441	1.98228	4.01316	3.53297	5.79698	4.75809	2.66609e-06
FGA	no	no	5.36278	5.22597	4.73049	5.53546	5.57357	6.04769	5.68918	7.85016	6.7615	8.98845	9.1352	8.57939	6.72121	7.09431	8.57381	10.1087	4.51543	5.58484	5.45688	7.42074	3.80347	8.90449	6.62475	7.4122	9.23791	9.11768	6.31781	5.77601	8.15385	8.97406	6.30306	8.89078	7.04689	7.6017	2.03194	2.38238e-05
FGB	no	no	2.96341	3.87429	3.08568	3.29145	2.69409	2.73245	3.59633	6.68644	6.6951	8.14929	8.85311	9.68325	4.86762	6.51082	10.08	10.6198	1.6983	5.58674	4.69785	4.5453	2.23303	7.30538	6.61184	4.59183	9.6856	9.36224	5.6312	4.03457	8.30967	9.859	6.94415	9.1717	2.03131	3.7073	3.11984	7.27596e-05
FGG	no	no	2.47598	2.75002	4.05345	1.87852	2.5836	2.97205	1.88558	7.07526	6.84494	8.23643	9.21568	9.91414	4.67847	6.95885	9.68165	10.6063	2.18713	6.15337	4.75441	4.17906	2.03083	7.49296	7.1777	4.72891	10.0168	9.31026	6.30399	4.18697	7.87709	9.55914	6.67115	9.70549	2.50425	3.54798	3.40432	9.54005e-06
SLC4A1	no	no	-3.80774	-4.08243	-4.38123	-4.2887	-4.7263	-4.05006	-4.10816	-2.95774	-3.32763	-3.50724	-4.01008	-1.88289	-4.33985	-4.33734	-2.15067	-4.25216	-3.78447	-4.12697	-1.30467	-3.99652	-3.45575	-3.85935	-2.65738	-3.33644	-1.02703	1.93793	-4.31409	-4.02166	-3.31018	-3.88113	-4.0907	-2.43497	-3.82446	-1.85977	0.953669	0.0156368
CRP	no	no	3.02129	2.60004	2.98661	2.94377	3.51854	2.87403	2.49084	5.99382	5.13724	6.75161	3.36199	5.59961	1.42253	6.699	7.16301	7.07715	4.88261	1.79358	4.97992	4.54895	1.61252	7.11205	5.11621	4.02532	5.77357	8.90313	4.67646	5.71837	7.30937	6.10694	4.64256	5.82016	5.81521	6.9292	2.25077	8.99116e-05
APCS	no	no	1.74668	2.12397	1.56902	1.57898	3.06713	2.24861	1.19898	5.86744	4.50907	5.14772	5.40213	5.83895	3.08503	4.64948	6.96383	7.35331	2.0253	2.55164	3.12621	3.80688	3.23315	6.38711	7.07641	3.94053	6.65336	5.40326	4.66744	2.07071	5.00806	6.86524	4.47965	4.57249	-0.155998	3.0089	2.14589	6.99957e-05
C1QA	no	no	-1.9084	0.905142	-2.45269	-1.69634	-1.43321	-1.38709	-2.87094	0.672887	0.38072	0.942358	3.26727	2.84735	-2.02532	-1.41637	4.27455	4.17054	-1.48593	-3.23072	-1.41717	-1.36585	-1.46356	3.37976	0.957423	0.923906	2.41658	0.906245	1.48326	-2.24693	3.47919	3.24323	0.931886	2.56909	-2.79097	-0.723925	2.05534	0.00340827
C1QB	no	no	-2.26497	-1.57713	-1.82106	-1.7151	-1.01611	-1.546	-1.70546	1.00991	1.14973	1.57387	3.74529	3.14868	-0.671866	-0.864093	5.08963	5.02973	-3.21239	-1.70441	-0.614424	-0.657891	-1.62055	4.13013	1.62112	1.12219	2.3331	1.48039	1.26876	-1.0564	3.91757	3.73164	1.46759	2.809	-2.04592	-0.108588	2.5814	5.78553e-05
C1QC	no	no	-1.55013	-3.13127	-1.60194	-0.510662	-1.16271	-1.18891	-0.210919	1.78225	1.59955	1.95533	3.91345	3.85248	-1.07168	-0.131416	5.77342	5.9261	-1.87792	-1.78607	-0.984966	-1.26534	-1.92527	4.81374	2.653	-2.07993	2.75446	2.12334	2.56496	-1.72011	4.75733	4.57961	1.46565	3.84804	-1.96692	0.429732	3.02555	3.41999e-05
C9	no	no	1.78025	1.97105	1.9411	1.57499	1.47302	0.121417	1.06107	4.7045	4.52533	5.91826	5.81406	5.80261	3.12805	4.42941	6.45108	7.41944	0.767019	2.16175	3.20486	4.25226	1.87372	6.29809	5.44471	4.00921	6.01247	4.57006	4.46273	3.66991	6.08416	6.56604	3.34125	5.33214	4.28613	4.35219	2.73031	0.00011369
APOH	no	no	2.76032	4.24735	4.10251	4.608	4.71006	3.99392	2.46866	7.80321	7.13043	8.64579	9.46686	8.8097	8.83036	8.25624	8.10996	10.0791	6.44919	5.87073	7.30624	7.99406	6.91823	9.70147	9.22023	8.13209	9.25772	7.5737	7.99486	7.6235	8.82854	7.88552	8.23478	7.02897	9.26479	9.23694	4.36783	7.92481e-06
LRG1	yes	no	7.17318	1.88785	2.6605	0.248025	1.39208	0.216913	1.82297	9.17237	11.2969	9.57876	6.81259	9.15932	6.90805	9.04449	7.57512	7.59381	2.34532	9.96524	11.6904	7.79048	7.70455	8.89589	5.92503	6.86671	6.9771	10.0986	8.9436	10.8056	8.38942	8.54832	10.7246	9.92121	10.4498	8.0943	6.26854	9.58557e-05
FN1	no	no	3.42897	3.15721	3.19004	2.33414	3.01577	3.30426	3.14427	4.93398	3.95529	3.01625	5.90626	5.85349	4.60814	4.01982	7.07181	7.62336	4.30875	2.96414	4.0063	5.16268	4.2093	7.10059	5.24891	4.42431	6.25324	5.05581	4.10864	3.64505	5.385	6.75138	4.98583	5.8879	3.93651	2.84755	1.86517	1.39526e-05
RBP4	no	no	2.91163	3.92874	2.01411	0.66252	1.41811	4.16417	3.47583	6.814	9.64519	6.23395	6.5236	6.85563	5.98961	5.82738	7.0539	7.55378	5.24765	2.61427	8.1246	8.49704	4.84492	7.07005	6.617	8.81981	6.88129	5.84071	7.60856	8.88978	6.64653	5.69141	9.77093	9.0137	6.26033	6.87787	4.53348	1.87863e-05
AMBP	no	no	7.80076	7.4111	8.18103	8.85405	8.3889	9.19726	8.05052	10.5971	11.9707	11.0523	8.67334	10.2791	11.5696	11.5036	8.66069	8.69311	10.1744	10.5575	12.5078	11.081	11.1476	11.4928	9.19986	9.82728	8.6701	11.0029	11.265	11.6769	10.3169	9.78815	12.666	9.74602	11.1915	10.7384	2.32534	1.34816e-05
ORM1	yes	no	5.48759	7.98436	5.93653	8.29565	6.12151	7.81448	6.17878	10.6808	11.3895	10.552	9.70725	10.5462	10.5135	10.2458	10.0173	9.92474	9.89796	12.081	11.6668	10.8092	11.8731	11.4328	10.099	9.70143	9.33133	11.291	11.0772	10.9419	9.66187	9.77931	11.3866	10.5473	11.0065	10.8561	3.799	0.000210484
AHSG	yes	no	-0.00588892	-2.29015	1.30651	-1.7551	-1.76526	-0.87944	-0.797934	6.4586	6.78308	6.47399	6.63866	5.06822	5.60423	4.05261	6.23282	7.20544	-0.332689	3.87364	7.30213	5.74688	1.43079	6.99141	5.74107	4.68444	7.06258	6.39303	6.37662	6.53187	7.63091	7.53402	7.9359	6.24278	6.97832	7.03092	6.46664	1.22502e-05
TTR	yes	no	3.15106	3.14461	1.73661	3.36853	3.82391	3.76758	3.72187	7.20602	6.66939	8.36132	8.29617	8.18433	4.71912	6.08818	9.1116	9.64114	0.384152	3.19949	5.04668	3.60986	2.73555	7.4305	8.09216	3.45173	8.65648	7.33285	5.28465	4.65885	9.64794	10.0215	7.48411	5.53298	7.08644	8.72012	2.95882	9.48829e-05
ALB	no	no	7.71186	4.10752	7.21412	5.96772	5.02429	7.59776	7.81731	10.1568	10.0359	11.2015	12.1903	11.3399	10.0609	10.1624	11.2599	11.7434	8.97974	8.78553	9.20681	9.44663	8.71652	11.1864	11.6336	8.98257	11.8004	10.4538	9.94133	9.32814	10.9633	11.3612	10.0753	9.87663	11.162	11.8327	4.10468	0.000252495
GC	no	no	3.01386	3.88273	1.9251	-1.09406	4.18191	3.53642	3.67172	6.59421	6.08571	7.76463	7.82088	7.7788	5.85745	6.79606	8.15955	8.25709	0.0321553	4.67195	4.71908	5.21006	2.56185	7.86239	7.24342	4.47855	8.39933	6.4824	6.31299	5.55601	8.41638	7.90454	6.36777	6.87007	7.31568	8.07652	3.89281	0.0014998
PPBP	yes	no	-1.72355	-1.96244	-2.6583	-1.8851	-2.21131	-2.44157	-2.46692	-1.2853	-1.7059	2.05675	1.5677	-0.938759	-1.54348	0.551042	-0.889869	-0.0830428	-2.06741	-2.16522	-1.16153	-0.366002	-3.0767	-0.896581	0.855164	1.37208	0.543556	2.77818	-2.97797	-2.72845	-0.85001	-0.271492	-1.49231	2.38737	0.397958	2.02595	2.22462	1.17172e-05
PF4	no	no	-2.61809	-2.28871	-2.02359	-2.714	-2.60029	-2.98672	-2.2147	-1.91097	-1.25773	-0.0659318	-1.94239	-2.65816	-1.84448	-2.20955	-2.83782	-2.21264	-2.89459	-2.74621	-0.17036	-1.28065	-2.49876	-1.00867	-2.43213	-1.03291	-2.52457	0.63412	-1.79055	-0.173643	-3.11953	-1.69406	-2.13778	-1.52826	0.00418455	-0.288831	1.05761	0.000328002
CXCL10	no	no	-2.66427	-2.64039	-2.25318	-2.48206	-2.95845	-2.84622	-2.32143	-1.80301	-1.08746	1.77628	-1.10952	-1.15689	1.87475	-3.14307	-1.3813	1.03709	-2.22139	-2.24239	-1.03363	-3.31798	-2.50693	-0.0772519	0.902575	-0.86842	3.45695	-3.09388	-2.2861	-2.76008	0.723356	2.02988	0.661256	-1.39932	-1.00461	-2.82233	1.32576	0.00593361
TFRC	no	no	-1.71202	-3.08806	-2.86677	-1.82138	-2.84315	-1.97948	-2.04538	-2.10865	-0.580825	1.04208	1.49878	0.967335	-3.57059	-2.85976	0.867401	1.16222	-2.01717	-3.4309	-0.991644	-2.44276	-2.3474	-0.809796	-0.512567	-2.80135	-0.223897	-0.546209	-2.85016	-2.18287	-0.0113536	0.35578	-2.2065	-0.0703317	-0.978587	-0.527766	1.53001	0.000393751
TF	no	no	5.15283	1.96868	5.30745	4.55999	5.98319	2.33723	5.9948	10.2268	8.98335	10.8048	11.4752	10.992	8.72072	9.79892	11.2341	11.2984	4.30136	9.03853	8.62049	8.49662	5.72109	10.8144	10.5801	7.27524	11.2811	10.0964	8.68575	7.16513	11.5232	11.2198	9.82173	8.81784	10.2688	11.1316	4.7465	0.000827363
LTF	yes	yes	2.22593	0.798271	1.51122	-0.403397	0.000610187	-0.347701	1.19996	5.43399	5.44945	3.85709	8.32495	10.6529	4.95445	4.63727	7.20591	7.87015	3.58044	6.23296	6.25118	4.72462	3.70574	5.48517	1.78173	7.23267	9.03815	8.0229	4.24258	1.01246	7.17707	6.94368	7.30014	7.80725	-0.969298	1.06192	5.08356	4.45638e-07
HPX	no	no	4.79319	0.0609866	5.31576	0.802757	1.30565	2.74736	5.17655	9.12478	8.80986	9.56834	9.76071	9.83168	7.92395	9.07785	10.2124	10.8223	6.61426	6.93588	7.99753	7.81198	5.36149	9.83139	9.35896	7.13024	10.605	9.37409	8.99148	6.89197	10.1841	10.5103	9.60594	9.60033	8.77432	9.48607	6.52682	6.6883e-05
FTL	yes	no	-3.82024	-3.5994	-2.81277	-3.42639	-2.58395	-4.08268	-2.34192	-3.45122	0.371659	-1.85747	-3.44426	1.54916	-2.62018	-2.36053	-1.47801	-1.26655	-3.12203	-2.6122	-3.03002	-0.0655429	0.219591	-1.96543	-3.88235	4.11962	-4.19139	-0.7003	-2.67752	-3.6684	-0.216956	-2.83539	-1.68049	-2.01984	0.478918	-1.0445	1.3348	0.00461995
FTH1	yes	no	-4.28075	-3.85916	-3.11219	-3.09229	-4.19814	-1.93049	-2.88425	-3.72285	-1.87772	-3.38326	-3.53163	-0.0922032	-2.43519	-1.9799	-2.46783	-1.38892	-2.50794	-3.55424	-3.46265	-2.00195	-0.915623	-3.7923	-3.16837	2.84995	-1.99542	-0.188528	-2.84841	-2.30282	-3.4564	-3.66278	-3.41056	-2.50218	-2.03699	-3.05179	0.630827	0.104113
ANG	no	no	-3.4194	-3.38276	-3.55579	-3.35697	-3.38491	-3.49594	-3.92159	-2.30073	-2.88806	-1.57637	-0.666897	-1.78126	-2.26074	-1.81539	-1.66527	0.492037	-3.64404	-3.40245	-3.13846	-3.50836	-3.84832	-1.52826	-2.93577	-0.747827	-0.923729	-2.36102	-1.11573	-4.61033	-1.57022	-1.14302	-2.79643	-3.69778	-4.26405	-3.97312	0.964144	0.00320132
F11	no	no	-1.11858	-1.57572	-1.36017	-1.83504	-1.28852	-1.55494	-1.09996	-0.615276	0.112973	-0.573296	1.40436	0.772887	-0.852739	-0.0445694	2.38813	2.2994	-1.58119	-1.94471	-1.97231	-2.19943	-0.844573	1.23528	-0.23894	-1.57995	0.126115	0.52731	0.373622	-0.636339	0.867093	1.62908	-0.956757	0.305611	-1.16788	-1.22512	1.20087	0.000139367
KLKB1	no	no	-0.583215	-0.890238	-1.41381	-1.62936	0.397452	-0.331467	-0.885572	3.34387	1.75508	4.44827	4.73315	3.95572	0.662006	2.80121	6.09768	5.52268	0.164779	-0.527909	-1.51696	0.233799	0.183	4.13496	3.56149	-0.423362	5.20216	3.19332	2.9662	-2.68769	4.89923	4.74291	2.39007	3.62935	0.154538	3.83009	3.02646	0.000387013
MMP1	no	no	-3.51604	-3.3633	-3.10512	-3.51996	-3.02013	-3.48067	-2.99185	-3.82933	-3.2845	-0.773744	-0.739487	-0.574328	-3.48277	-3.58274	-1.03285	-0.684333	-3.65726	-3.45482	-3.6538	-3.40529	-3.62429	-4.46361	-3.23467	-1.52845	-3.58902	-2.03268	-3.37135	-2.91075	-2.77738	-3.73258	-4.15784	-1.70299	-3.52739	-3.53568	0.594566	0.0546663
SLPI	yes	no	-0.757917	-2.28499	-1.37788	4.83351	1.26376	0.554675	-2.71337	-0.71721	2.00393	3.5771	0.70156	0.906712	0.763935	3.79464	-1.19843	-0.0561911	4.70913	-1.5269	0.115056	0.289209	-1.38365	2.1882	0.799624	4.71024	-2.23937	2.05397	1.71361	-0.361228	-0.205806	-1.64667	1.02529	-2.36142	2.14445	1.51262	0.864361	0.503123
C4BPA	no	no	-2.48731	-1.03482	-1.35072	-0.699842	-0.556289	1.87749	-0.519386	3.02456	2.69511	2.88219	7.37574	5.75223	2.83687	0.813636	8.30207	7.93088	-0.452198	1.24554	1.08965	3.36177	-1.18147	7.88263	4.2917	0.765485	5.19931	3.54227	4.07185	-1.49233	6.0784	7.45306	3.78527	6.82038	-1.47527	0.772942	3.40317	3.37908e-05
VTN	no	no	-0.641266	0.854312	1.85336	0.475914	-1.36731	1.05913	0.111167	6.34489	5.62029	4.71243	6.22644	6.227	5.03628	5.39486	7.94639	7.49782	3.9133	3.443	3.84917	4.98774	3.54915	6.87313	4.98177	4.23764	7.48485	5.83634	5.04888	4.48339	7.08275	7.44335	5.28774	5.60095	4.33817	4.25109	5.16408	6.44999e-06
CAT	yes	no	-0.271909	0.040074	-1.33003	0.309931	0.830414	-0.797312	-0.992571	1.04681	2.39538	2.82537	4.18845	4.91325	0.185531	1.60138	2.99063	2.84196	0.523901	2.68151	3.01261	0.261561	1.47821	-0.747524	1.98106	5.02225	2.94985	5.60012	-0.555573	-0.480233	-0.278738	0.99621	1.41512	4.94634	0.0271098	2.95629	2.28056	7.41249e-05
GBA1	no	no	-2.41059	-2.58423	-2.4623	-2.59492	-2.35651	-2.16639	-2.31604	-1.42668	-0.367045	0.0158998	-1.88468	1.35943	-3.37974	0.919548	-2.06577	-1.30503	-1.96946	-3.2228	0.219714	-2.4331	-2.15902	-2.01186	-1.05267	-2.01825	-1.14816	-0.166196	-1.69077	-0.570407	-0.443642	-0.795322	-0.769636	-0.484905	-0.264493	-2.07201	1.35023	1.41008e-05
FUCA1	yes	no	-1.20729	-0.500936	0.371693	-0.594634	-0.469473	-0.736615	-0.899351	2.38284	2.74241	2.70674	-0.590309	3.67763	-0.0954281	2.94282	2.25697	0.486839	-2.51046	-0.324024	2.63224	-0.459398	0.369263	-0.277187	0.930462	2.26439	1.17131	2.05811	1.59754	3.37486	2.38739	1.42593	2.81252	2.00673	2.15486	0.550329	1.97965	5.69491e-05
PROC	no	no	-4.12048	-3.45669	-3.92115	-3.43367	-4.16834	-3.83669	-3.65954	-2.37342	-3.38879	-1.5599	-1.78644	-2.9806	-3.18693	-2.99963	-0.923752	-0.180875	-1.13067	-3.97881	-3.57745	-3.59877	-3.89115	-1.65533	-2.32126	-2.65565	-1.70293	-2.89834	-3.15751	-3.36409	-2.61192	-0.252656	-2.55854	-3.1499	-3.43867	-2.20667	1.05289	0.000558038
ALDOA	yes	no	-0.0713647	-0.304867	1.00441	0.163405	0.201238	1.05322	0.766467	3.23083	4.53618	3.84947	5.00113	5.42234	1.63552	1.06135	3.85114	3.57563	-0.0680863	3.58971	4.0744	2.62376	1.33916	1.81773	2.07129	5.01576	3.37669	4.49317	1.15145	0.561132	1.51419	2.18249	2.20186	4.67909	2.93242	2.23675	2.20551	6.44999e-06
CSTB	yes	no	1.6226	1.38578	1.56451	4.07779	0.934847	4.69195	0.535342	4.04312	5.09172	3.05958	2.95615	1.7675	3.28898	3.1847	2.15524	2.66272	2.59762	3.11541	4.72492	2.73072	3.09208	3.93833	2.57688	3.06146	2.71526	3.01806	3.67015	3.80393	0.921761	2.26029	2.75389	3.47419	2.46576	3.58481	0.964218	0.226981
ANXA1	no	no	1.05918	0.693732	1.09326	2.16322	1.11672	5.10523	-0.208832	1.80454	2.70849	4.73646	5.81074	3.84265	3.41378	2.69286	3.40359	2.75942	0.136106	2.46292	2.47879	2.56539	1.53874	3.48503	0.590772	4.64694	1.05223	3.96913	1.63296	1.17628	-0.0814261	3.82382	1.60167	1.71573	1.79179	2.22835	1.04776	0.233235
APOB	no	no	0.497628	1.37981	-0.547458	-1.05279	0.134393	-1.25985	-1.05034	3.28136	1.89105	2.98445	3.70308	5.76666	1.08288	2.72241	8.17005	4.57081	-0.784121	0.391199	1.45258	0.690488	-0.367558	4.81706	3.28336	1.97581	1.80688	2.30397	1.37738	-1.02919	1.19519	4.87094	3.11687	0.669945	-0.694263	1.37154	2.23984	7.14712e-05
CLPS	no	no	-1.30453	-1.32524	-1.64313	0.494203	-4.12891	0.248957	-2.23607	0.67828	-0.199046	1.09166	-2.8667	-1.1074	0.0932987	1.02928	-0.897337	-1.13709	-1.49336	-2.00179	0.18187	0.394884	-1.80267	-1.38626	0.269902	2.8242	-1.80283	0.73962	1.1687	2.01804	-2.24475	-2.07444	2.5562	2.16166	-1.6437	0.288191	1.19412	0.155611
TFF1	no	no	6.45981	8.37457	4.56333	7.79085	4.25764	8.47928	6.3763	5.14829	6.28951	4.46483	3.97687	3.48078	5.63648	5.55747	2.36015	2.55629	6.89878	4.2101	5.66502	4.90984	4.52482	5.36312	4.82608	5.83122	2.01979	4.90323	5.39022	6.04258	2.6938	1.40699	5.23602	4.42625	4.54204	5.85005	-2.01415	0.0335304
PRNP	no	no	4.09619	3.43024	1.52843	4.57621	2.41511	5.17715	3.46999	4.44904	4.63193	2.84022	0.108892	2.01482	5.12857	4.66728	0.0969256	2.31338	5.27783	3.72201	4.80841	4.60434	4.2503	3.87052	3.47595	3.75777	1.13377	3.86897	5.10621	5.17935	3.13946	1.83663	4.59149	2.98906	3.74898	3.97353	0.0125912	0.986541
SOD2	no	no	-3.09852	-2.86297	-3.79116	-3.4259	-3.15141	-3.29566	-2.57538	-1.6353	-0.426238	-1.4091	-1.55344	0.480669	-3.56971	-2.99309	-0.845899	-1.8121	-3.40379	-1.90685	-1.09911	-4.12851	-3.18774	-3.55322	-2.91279	0.79753	-3.08708	-1.59055	-1.82543	-2.62195	-1.62976	-1.55637	-3.84573	-1.46135	-3.54594	-3.34154	1.63346	1.66894e-05
LCAT	no	no	0.140584	0.538728	0.665314	0.453546	0.222034	0.128296	0.504095	3.6312	2.83632	2.61534	2.0822	1.57559	1.81894	3.31053	3.46706	3.813	-1.56482	1.54557	3.08908	0.256942	1.01357	2.54597	1.86217	-1.04267	3.23015	0.59394	3.53113	2.51459	3.30314	2.78597	2.1124	2.31183	1.38954	1.81623	1.52559	0.000232665
HRG	no	no	1.433	0.467091	0.796371	1.10715	1.3401	0.193738	0.933697	3.10587	5.06381	0.785955	6.27152	6.88409	5.08485	3.13479	5.8554	6.96364	0.739844	2.82591	2.96679	2.93882	1.21895	6.10149	5.90377	2.74261	5.53933	4.46614	3.54463	1.6055	2.27336	5.46438	5.72463	1.55027	1.37239	-0.00693095	2.54392	2.95233e-05
IGLV7-43	no	no	-3.57612	-2.407	-2.66009	-3.27936	-2.27256	-1.85757	-3.09775	-2.81619	-0.0555715	1.39114	1.01181	-0.148917	-2.22573	-2.74004	-1.97497	-1.45603	-2.60195	-2.52387	-2.23004	-2.51898	-2.08043	-0.155783	-2.31049	0.12954	-2.8586	-2.16862	-2.3974	-2.80057	-1.88694	-2.03918	-2.9355	1.27268	1.00326	-2.18848	1.01956	0.0158156
THY1	no	no	0.665126	2.92331	1.89606	4.71154	1.66614	5.78519	2.72715	6.07137	6.6214	5.13943	1.23607	3.68633	6.37698	5.65237	2.47182	1.81983	5.70609	6.93223	7.22714	4.82533	6.01381	5.40791	4.22223	4.05748	2.65666	5.40622	6.19449	6.52816	4.40116	3.5308	6.4748	4.12216	6.21684	4.54701	2.03551	0.0375885
A1BG	yes	no	0.536189	-0.503243	2.38399	-0.862596	-0.398253	-0.590676	-0.830241	6.61751	6.96786	7.30982	6.58355	8.10931	4.93197	4.91395	7.86215	7.2985	0.513248	6.4612	7.45489	6.25639	5.61702	7.44413	6.16616	3.2026	7.18114	6.70763	5.55722	5.45305	7.92196	7.63783	7.03261	6.34576	7.75798	6.51407	6.41505	5.96767e-07
CD74	no	no	-3.23526	-3.32547	-3.65557	-2.99037	-2.29827	-2.76917	-2.75658	-3.2677	-0.0110941	-1.14663	-2.66372	-3.15091	0.040183	-2.03325	-0.856211	-2.39657	-3.7561	-3.11848	-3.62544	0.853541	-0.426954	-3.5842	-3.12484	-2.23684	-2.42277	-1.19661	-3.34019	-1.32765	-3.44548	-3.05499	0.822293	-1.9608	-0.852103	-2.0077	1.04863	0.00331421
KRT6B	no	no	4.26036	1.53671	1.51865	5.30351	5.07701	5.63241	5.07852	5.498	3.60369	2.23997	0.73867	2.33683	5.86904	5.21042	2.39519	1.61334	5.30499	7.7349	4.01732	3.62902	6.0527	4.75222	3.18174	1.9172	3.04503	1.95843	3.04135	3.11743	4.16216	3.86743	3.61583	-0.0788868	3.01281	2.98114	-0.529453	0.569671
KRT1	yes	no	4.96465	1.53685	3.95104	6.05173	5.06588	5.94643	6.05606	6.5241	3.41749	3.15387	1.22791	2.83329	7.20165	6.60165	3.20291	2.44853	7.54627	7.86337	4.62093	4.77825	6.39703	5.01028	3.97649	3.12043	3.75062	2.91712	3.71849	3.78771	4.90401	4.1932	4.33835	1.28872	3.76679	3.48654	-0.49698	0.563475
VWF	no	no	-0.465624	-0.919246	-0.804078	-0.569169	-0.630329	-0.579377	-0.745474	-0.392475	-0.00362918	0.0524802	0.638432	0.275552	-0.866843	0.403567	1.80251	1.129	-0.886088	-0.498283	-0.197243	-0.403767	-0.648596	0.532721	-0.0888105	-0.0386231	0.282676	1.44027	-0.461245	0.434557	-0.319657	0.105984	-0.625579	0.436614	-0.107791	-0.360729	0.698289	0.000454509
SHBG	no	no	-0.666947	-1.88731	-0.00702003	-2.11229	-0.224132	-1.39826	-1.65341	-1.24374	0.869865	2.53508	2.89692	2.72698	-1.54826	1.04489	6.03042	3.99332	0.509922	-1.93636	0.938664	-1.07105	-0.808347	1.55239	2.94114	-1.32066	5.88827	2.23271	1.23032	-0.489811	6.179	4.04567	0.463053	1.37659	2.02388	2.13525	2.69425	7.51754e-05
SEMG1	no	yes	2.54407	1.05458	0.475364	9.07092	-2.01588	-2.01122	2.18449	-1.17542	-0.858808	-0.0161764	-0.221186	-2.4097	0.139191	0.542164	0.87957	2.23364	-0.393678	-1.07034	1.50765	2.16313	0.259967	0.00565867	-0.793867	-0.344842	-0.392155	0.458709	-1.35829	-0.876942	1.42074	1.41909	0.713868	1.36376	0.965001	1.16751	-0.608188	0.768918
GAPDH	no	no	1.99824	2.64868	2.35053	2.66151	2.02219	2.38189	1.53636	5.2111	5.33975	5.25737	7.56035	7.08497	3.11197	2.43632	4.72223	5.05996	1.07294	4.62333	5.93677	3.92985	2.05724	3.71825	4.03746	6.51565	4.83911	6.23057	1.59743	3.5619	3.70396	4.91754	3.02285	6.31973	4.63983	4.62996	2.29144	1.48817e-05
ASL	no	no	-2.41262	-2.32756	-2.11162	-2.11897	-2.13325	-2.14101	-2.12611	-1.43633	-0.75758	-1.07608	-1.14675	-0.244327	-2.35543	-2.1372	-0.989953	-1.90297	-2.27052	-1.82032	-1.4045	-2.32458	-2.13151	-1.81818	-2.32222	-1.27392	-1.537	-1.40901	-2.06425	-1.21669	-2.15183	-1.66251	-1.09221	-0.165651	-1.91634	-1.83253	0.528477	0.000313624
IGKV1-16	no	no	-1.33974	-1.29543	-1.8662	-1.45394	-0.975231	-1.6225	-1.65337	0.115912	1.03141	1.22037	1.03875	1.27515	-1.62028	0.619836	0.337668	2.40602	-3.36539	-0.541153	0.679259	-0.62912	-1.92722	1.45514	0.571208	-1.48121	0.721417	-0.132572	-0.417958	2.21362	1.94574	2.20543	1.36157	1.1807	0.988741	1.00402	1.61105	2.8537e-05
IGKV3-11	no	no	6.24077	5.60054	6.23686	2.42448	4.80861	2.89542	5.40514	7.76818	8.6724	8.85689	8.34143	9.07495	7.55319	8.73979	9.19755	9.5322	5.0483	6.95679	8.65578	7.13608	6.38284	7.77466	7.54037	7.35316	8.28963	8.70697	7.25552	9.83785	8.62491	8.46543	9.00248	8.18769	8.89505	8.87305	3.47622	0.00102853
HLA-A	no	no	-2.73731	-3.0113	-3.08789	-2.95708	-2.60586	-2.25729	-2.82659	-0.234855	2.19121	-1.1547	-0.982096	-0.713365	-1.89522	-2.15072	-1.14757	-1.30554	-3.84478	-0.599748	1.13807	-2.64271	-2.02929	-0.299679	-1.01811	-1.0329	-1.14856	0.475677	-1.44434	-3.0319	-0.235636	-0.943566	-0.49855	-3.70651	-0.836048	-3.2959	1.64093	0.000253744
HLA-DPB1	no	no	-0.253834	-0.01284	-0.247158	-0.0999658	-0.253198	-0.270759	-0.0547486	-0.0735213	-0.19698	-0.231226	-0.187375	-0.373589	-0.167189	-0.397127	0.0390277	-0.278633	-0.335276	-0.303196	-0.106663	-0.281853	-0.226465	-0.0598521	-0.276857	0.419912	-0.159122	-0.158799	-0.325208	-0.241514	-0.142432	-0.133862	-0.280668	-0.142899	-0.207962	-0.181804	-0.0542314	0.26702
CAPNS1	no	no	-2.71577	-2.89681	-3.10116	-2.54311	-2.9413	-2.47501	-2.96811	0.37095	0.0217598	-0.801116	0.517058	0.536022	-1.15434	-2.2865	0.463752	-1.28034	-3.44308	-0.637085	-0.132668	-2.54994	-2.16145	-1.36222	-2.7526	0.317469	-0.660716	0.577571	-1.66516	-0.984765	-1.90513	-1.17972	-3.02023	0.369297	-2.01147	-1.67356	1.62073	1.87863e-05
MT1F	no	no	-4.92374	-5.94785	-6.29463	-6.437	-5.47904	-3.26748	-5.33016	-5.83121	-4.94469	-6.07212	-6.47024	-6.00346	-5.07486	-5.56158	-5.82295	-5.86125	-3.58676	-5.24527	-4.50258	-5.51953	-2.43723	-5.66271	-5.40969	-5.45137	-5.53414	-6.08414	-5.02215	-3.84689	-5.48737	-5.62373	-5.77108	-5.22353	-3.86935	-5.6553	0.188794	0.729461
AMY2A	no	no	0.221574	0.772347	1.77997	-0.0903213	-0.354064	1.74218	1.49294	5.23928	6.79699	5.44306	1.92878	4.15404	5.28791	6.16911	2.96685	4.91681	5.68203	4.55049	3.5194	-0.508255	5.12939	4.83667	6.52338	1.99875	3.87668	3.81262	6.72858	2.80537	7.00921	5.42354	5.98589	4.95171	4.63178	4.50535	3.837	4.92657e-06
HSPB1	no	no	0.215285	-0.0775588	-1.63969	4.52462	-0.951055	2.74316	-0.503794	3.41707	4.03977	2.07039	-0.0995347	0.623945	0.84372	2.1202	-0.468924	1.15478	-1.7964	0.171466	1.17052	-0.017627	0.304403	2.11976	1.93278	-0.690917	1.60419	2.54143	0.800109	2.50234	1.38614	1.69309	-0.313746	0.515795	1.92578	1.85658	0.591032	0.585509
CYBB	yes	no	-4.0193	-4.81113	-4.377	-4.19041	-4.23697	-3.35948	-3.1299	-1.67582	-3.01695	-3.54367	-2.41625	0.00433004	-2.47947	-4.54604	0.791078	0.820472	-4.73082	-3.09747	-4.05544	-3.009	-4.94606	-4.25819	-3.42851	-0.620356	-2.37554	-1.1993	-4.58719	-4.00083	-2.88091	-1.60956	-1.44182	0.604882	-3.7184	-3.62182	1.59987	0.00713947
GNAI2	no	no	-0.608231	-0.957823	-0.734057	-2.26693	-0.797448	-0.24396	-0.506604	0.988538	0.229289	0.40792	1.19074	1.63118	0.746109	-0.05716	1.20003	1.35397	0.317828	0.336821	0.487812	-1.39771	0.684526	-0.0511233	0.0845894	0.250755	0.877765	0.199238	-0.793069	0.508667	0.199924	0.706655	0.231035	1.72399	0.85542	-0.30722	1.35934	0.00252852
H2AC4;H2AC11;H2AC7;H2AC25;H2AC6;H2AC12;H2AC14;H2AJ	no	no	-2.2706	-3.85151	-5.74862	-4.90015	-3.5159	-1.63956	-4.16208	0.052612	0.593585	-5.90127	-1.04264	0.0156582	-3.89563	-4.35402	-2.69339	0.999939	-4.34471	-4.57938	-2.10817	-4.70407	0.671118	-4.95204	-2.77646	-4.73529	-1.73622	-1.88536	-0.0874661	-3.71767	-4.39459	0.376815	-1.93925	-1.04502	-3.01547	-1.19259	1.72854	0.0402689	H2AJ
IGF1	no	no	-3.38856	-3.34575	-3.3589	-3.40244	-3.42475	-3.57978	-3.27558	-1.12014	-3.79809	-2.06484	0.187995	-2.46629	-2.90138	-1.26732	-1.43934	-0.761779	-3.37345	-3.40566	-4.07021	-2.01857	-3.17774	-2.0455	-2.6796	-0.627182	-1.99159	-2.92217	-1.72476	-1.7366	-1.87116	-2.52168	-3.44892	-2.33461	-3.07345	-1.24464	0.976854	0.00133237
ATP1A1	no	no	-3.41824	-3.36495	-3.5454	-3.58158	-3.83484	-3.31731	-3.57056	-2.39435	-2.67291	-2.99272	-4.01048	-1.56619	-1.62189	-3.38163	-2.54774	-3.27464	-1.67088	-3.35457	-1.96553	-3.41103	-1.29727	-3.24489	-2.98597	-1.65636	-3.65915	-2.74023	-3.93402	-1.12363	-3.71818	-3.38347	-1.86062	-4.47079	-1.02913	-3.38243	0.909647	0.000705955
ATP1B1	no	no	-1.43334	-0.955694	-1.01295	-0.966951	-1.25859	-2.57492	-1.09531	1.25447	0.212418	0.236353	-1.35889	-0.346155	1.08361	1.5762	-0.443145	-0.0423733	-0.432641	-0.183054	0.0679067	-0.903407	-0.300704	-0.30641	0.332945	0.965773	-0.822995	0.379701	1.01073	1.9938	-0.0244905	-0.323986	0.0624615	0.0682233	1.39249	-0.0284318	1.56868	0.000149753
CHGB	no	no	4.76214	6.16387	4.22504	5.91359	4.19149	6.04381	4.25662	3.65137	4.71968	2.07256	0.635441	2.09467	5.80608	4.21593	-1.11665	0.58583	6.4656	1.72257	3.22464	4.14718	5.74061	3.07204	4.11842	3.87721	1.56647	3.30814	4.88405	5.00084	2.66898	1.4984	3.64638	3.17254	3.98096	3.67328	-1.80421	0.00323011
ALDOB	no	no	1.11067	0.799548	0.839904	1.28212	0.834912	0.762205	1.12269	2.34326	5.56317	5.01109	1.55037	3.70423	2.33837	2.43716	4.71162	1.48003	-0.792503	0.255538	2.96705	3.81805	2.44577	3.41699	3.728	2.75161	2.56503	4.31424	1.5951	3.6705	2.51413	3.63319	3.64078	2.17541	4.52026	1.80106	1.93845	6.44999e-06
APP	no	no	2.28573	5.03482	3.23018	4.40119	2.45728	5.57895	4.85932	4.35427	4.68859	4.47757	1.76431	2.59566	5.57757	4.93781	1.40585	1.92009	5.47446	2.1537	4.30492	3.03027	5.2958	4.2411	4.48441	3.91534	2.15727	3.8238	3.72124	4.63669	2.92	2.62569	4.07549	2.16084	4.53386	3.84084	-0.214181	0.776524
ARG1	yes	no	-2.16019	-1.43272	-1.13355	-2.37509	-2.40887	-2.58965	-2.7015	-0.340706	0.8808	0.959133	2.72568	3.63733	-1.41149	-1.64344	1.42231	2.21732	-1.91637	1.54222	2.44734	-0.812911	-1.71236	-0.645946	-0.804058	1.27882	0.792512	1.8258	-2.28212	-3.16673	-1.10318	-0.181867	0.0672824	2.41066	0.320574	1.32626	2.35778	1.22502e-05
APOD	no	no	2.24201	2.22236	0.877825	3.38636	4.50459	7.86284	1.69235	9.18426	11.6174	7.61941	6.589	7.76008	8.47134	9.38348	6.08828	6.69321	6.62724	8.25795	9.43499	7.96534	7.82428	9.24645	7.07608	4.84921	7.10156	7.81973	9.80937	9.27727	7.68412	7.26771	9.11035	7.72207	8.83107	7.97883	4.79231	0.00274816
ALDH2	no	no	-3.32173	-3.28993	-3.53322	-3.53466	-3.32386	-3.76298	-3.20854	-2.39773	-1.5292	-3.48916	-3.78435	-2.10198	-3.26181	-3.21505	-1.53558	-3.51181	-3.84147	-2.7499	-2.09456	-3.37797	-3.81632	-3.3329	-3.51374	-2.46257	-3.02794	-1.75759	-3.47852	-3.29769	-3.07665	-3.32363	-3.7957	-3.471	-1.46379	-3.1453	0.532227	0.00750481
ITGB3	no	no	-1.85725	-1.70909	-3.69298	-3.19547	-3.784	-2.46009	-4.42674	-4.75944	-4.17903	-4.56953	-4.27747	-4.39627	-3.33441	-2.39735	-3.4792	-4.6676	-0.231036	-3.91107	-4.49156	-3.52809	-1.13717	-4.19097	-3.53298	-3.77875	-4.14194	-3.50119	-4.12201	-2.69252	-4.2899	-3.51336	-4.90032	-4.5397	-2.90907	-4.28187	-0.451922	0.456787
ITGB2	yes	no	-0.639674	0.246818	0.05738	-0.251045	0.151315	0.0264901	0.33181	0.874966	-0.705689	1.73587	2.90173	5.28305	1.03767	0.971743	1.85203	1.46497	0.372606	0.247546	2.26358	1.0691	-0.457333	0.877074	0.966657	4.55493	1.85138	3.32407	0.274215	1.18212	2.85309	1.5734	1.69839	3.80446	1.67905	1.45216	1.66873	0.000379728
S100A8	yes	yes	3.97412	4.7075	4.75791	5.17425	4.58982	5.65783	1.90467	5.25709	7.49275	7.39901	9.75978	9.64518	7.28319	5.98219	8.53871	8.07418	5.10129	7.41691	6.60742	5.67885	4.84912	6.33016	5.82294	8.32784	7.35471	8.10408	6.17172	4.75997	4.99732	6.58677	6.44458	8.69584	7.26394	7.98883	2.80821	0.000798108
HMGN1	no	no	-2.11996	-1.06206	-3.12176	-0.870092	-3.03781	-0.0514546	-2.34756	-0.932329	0.106357	-1.52695	-0.529717	0.531671	-0.511324	-0.606738	-4.07229	-2.59644	0.283337	-1.32849	0.0792546	-0.68697	-0.561752	-1.15508	-2.60319	2.49122	-0.935436	-0.363923	-1.11917	0.720096	-2.6047	-3.76331	-0.80056	0.132378	0.555926	-1.73411	0.791842	0.160866
SERPINB2	no	no	-3.73184	-3.91502	-4.12495	-4.35706	-3.64648	-2.79902	-4.4941	-4.09202	-2.84707	-0.624009	-3.96481	-2.0637	-4.55207	-3.65291	-4.398	-4.43562	-4.40939	-3.9046	-2.71811	-4.35888	-3.88633	-4.22133	-3.87515	-1.72459	-4.64707	-1.54305	-3.8655	-4.87656	-4.0317	-3.42522	-4.09436	-4.71922	-3.98952	-1.11153	0.481165	0.201966
SERPINA5	no	no	2.04791	0.358977	0.572629	2.13468	1.02632	0.657148	1.01439	4.22946	5.23901	4.47776	1.84636	2.53477	4.51914	5.59273	-0.246245	4.99763	3.16165	3.09807	5.71703	1.90869	5.31039	5.49186	5.01172	-0.99113	3.15654	3.82378	5.07856	3.58262	5.56377	4.73452	5.79205	2.13709	3.57868	2.57651	2.62037	1.91312e-05
SERPING1	no	no	0.823865	1.0896	2.72083	1.48451	0.562091	2.51218	0.811962	7.85821	7.51174	7.7086	7.8495	7.92909	7.24392	7.42519	8.05084	9.55344	5.33686	5.07869	7.18979	7.1109	6.37825	8.49187	8.44143	7.01995	8.50005	8.17466	8.20878	7.73429	8.7347	8.05052	7.60978	7.06532	7.79881	8.15959	6.40502	1.07919e-08
CFI	no	no	3.08077	3.24338	3.34656	0.120383	2.38186	2.8208	3.5506	5.21319	4.64445	5.86171	5.26358	5.70554	4.70912	5.6271	5.95488	6.50873	4.02313	2.3769	3.6876	3.26188	2.72588	6.3405	5.19076	4.17761	5.91633	5.21927	4.72304	4.25275	5.49174	5.93619	3.8869	5.38124	4.30238	5.88325	2.38703	0.00140579
F13B	no	no	-0.0757416	-0.462275	-0.636399	-0.627251	-0.468886	-0.310011	-0.0487974	0.927514	0.152418	1.3061	3.67556	1.49627	0.345081	0.5649	3.33348	3.93442	-0.835326	-0.753456	-0.960959	0.987766	-0.588168	3.50279	1.46948	-0.49766	3.36804	1.14291	0.616752	-0.412236	3.00666	1.98352	0.86082	1.87126	0.197832	2.63318	1.79661	2.99207e-05
ISG15	no	no	-2.75106	-2.90855	-2.87515	-3.11973	-2.28114	-2.57381	-3.06035	-2.22026	-2.12543	-2.41774	-3.22508	-3.07048	-2.84734	-3.12272	-2.2245	-2.76799	-3.06339	-3.07355	-3.06738	-2.77307	-3.03225	-3.19188	-2.97738	-2.88841	-3.10692	-2.34809	-0.648112	-2.48168	-3.05711	-2.8482	-1.35984	-1.60654	-2.45777	-2.96125	0.436759	0.00982815
MPO	yes	no	1.10151	1.42356	1.10033	1.0317	0.905966	0.736674	1.84141	3.19368	4.55857	3.92361	5.42815	9.20422	2.6335	3.72353	6.64259	5.04629	-0.596517	2.81296	4.10276	2.24835	2.50744	2.05619	2.08662	6.69664	5.4302	6.74484	2.6011	0.816881	4.0332	4.48635	4.19032	6.51843	0.959027	-1.18823	2.63187	5.10163e-05
ALPL	no	no	-2.85866	-3.38213	-4.01086	-3.47528	-4.15548	-4.03863	-3.43864	-3.93901	-0.296523	-1.55502	-3.21785	0.785315	-1.02131	-2.20604	-3.29826	-2.25999	-0.297043	-3.138	-1.31193	-1.7756	-3.40766	-3.23842	-3.42413	-0.521303	-1.68228	-0.599568	-2.45633	0.00638003	-2.1009	-4.37221	-4.24557	-1.75341	-1.6955	-3.24072	1.64919	3.05526e-05
EIF2S1	no	no	-2.40369	-2.99318	-2.67315	-2.38601	-2.20192	-2.51835	-2.65562	-1.11339	-1.56561	-1.65158	-1.31169	-1.97006	-2.64413	-2.27591	-1.92076	-1.22235	-2.46416	-2.53645	-1.87618	-2.61344	-2.45257	-2.56661	-2.5596	0.106376	-1.43274	-1.44048	-2.34185	-2.82399	-3.04063	-2.79601	-2.74785	-0.812699	-2.95302	-2.30765	0.575234	0.00324615
HMGN2	no	no	-5.45237	-5.00653	-4.70179	-3.57006	-4.2585	-4.62636	-4.27418	-2.09382	-2.44014	0.00128031	1.53532	1.16349	-0.477124	-2.938	0.469756	-0.868661	-3.00271	-1.59034	-2.18545	-1.2938	-4.29922	-2.77537	-5.02041	4.50908	-1.77709	-0.381448	-5.68401	-3.98327	-4.83956	-4.78074	-3.47953	0.919811	0.685567	0.549906	2.90374	1.49782e-05
IL6	no	no	-3.30364	-3.57222	-3.40826	-3.2104	-3.72767	-4.34796	-3.65405	-3.62071	-3.41376	-2.33341	-0.286138	-4.08995	-2.94586	-3.78236	-3.47058	-0.628125	-3.60857	-2.81014	-3.55019	-3.42673	-4.26164	-1.93051	-0.298916	-3.55959	-0.435612	-3.50558	-2.80024	-1.60874	-1.34169	-2.93334	-4.02925	-3.30855	-2.25801	-3.49883	0.862594	0.00348353
ICAM1	no	no	0.847409	1.04516	0.200958	-0.512155	0.890329	-0.913844	-1.28606	3.60038	3.44255	3.67029	1.12086	1.73515	4.14441	4.29223	0.896604	1.88802	0.83412	2.72699	4.52691	1.23099	1.50598	3.32707	3.18686	3.20189	2.02012	4.59364	2.80919	5.68335	3.29261	2.56073	3.36507	1.75281	5.30827	3.55814	2.83539	0.000250532
RPLP1	no	no	-3.74832	-3.54697	-3.08612	-3.67419	-3.30702	-2.35072	-3.66437	-1.47688	-0.939884	-2.53923	-3.11916	-1.73139	-1.84471	-4.19106	0.476776	-1.3696	-3.70626	-3.63148	-1.00246	-3.2053	-3.47442	-4.0562	-3.94789	-1.51137	-3.47283	-1.57127	-3.49949	-2.31872	-3.02061	-1.33089	-3.1051	-2.83402	-3.52283	-2.88475	1.176	0.00672782
RPLP2	no	no	-2.55826	-2.13517	-2.87023	0.117714	-2.75898	1.73818	-2.09494	2.46571	1.04371	1.09751	0.481973	-0.494436	0.134477	0.123317	0.226868	-0.503918	-2.38371	-3.557	2.08969	0.0577201	-3.61928	0.309991	-2.65876	1.1282	-1.25633	1.51188	-2.00618	1.6537	-1.52053	0.401348	-3.6525	1.13942	0.116978	1.51038	1.30755	0.158976
RPLP0	no	no	-3.91902	-4.24994	-3.41805	-1.86765	-3.21186	-2.85364	-3.92951	-1.05613	-1.35644	-2.62697	-2.02711	-2.77987	-4.00808	-3.15433	-0.958105	-3.43234	-3.38428	-3.435	-2.26604	-3.75799	-3.99022	-3.60057	-3.62718	-1.70033	-2.40402	-1.59987	-3.12888	-3.41386	-2.59959	-3.52338	-4.35947	-0.523037	-3.67925	-3.02097	0.783434	0.0642195
FABP3	no	no	-2.31944	-1.54644	-2.17923	-2.24002	-1.43828	-1.58634	-1.81884	-0.733465	1.30694	-1.00879	-1.38128	-1.19977	0.568085	-0.317149	-1.53301	-1.97683	-1.07977	-1.65077	1.6714	-0.378935	-0.796929	-0.0826535	-0.79718	1.46904	-2.10737	1.52908	-0.673891	0.318301	-1.44739	-2.80141	2.38848	-1.02981	1.31999	-1.19227	1.48658	0.00012876
REG1A	no	no	0.62641	3.80333	1.61289	2.28544	2.18966	3.57658	4.29246	4.48909	6.28332	5.48039	3.2916	5.71519	5.4744	5.00741	6.41489	-0.28451	3.83338	3.76163	6.48256	5.86112	2.12863	5.48463	1.3694	5.41348	0.784019	7.24934	5.76228	7.08826	3.22481	2.01468	7.92091	4.38082	6.10434	5.11946	2.03464	0.0112536
CLEC3B	no	no	-0.514411	-2.71822	-2.99375	1.58951	-2.39134	-1.09094	-0.891551	4.56907	3.90379	4.48128	4.03519	2.56795	4.73593	4.69821	3.4346	4.94786	3.3005	3.40461	3.2252	2.78287	1.76001	4.70016	4.6715	2.69576	4.53004	3.41626	4.63306	4.48316	4.46234	4.02996	2.98	3.088	4.29324	4.59532	4.84428	0.000944815
SSB	no	no	-3.77789	-3.21482	-3.54135	-3.60996	-3.69155	-3.5617	-3.81127	-3.13834	-3.2011	-3.59146	-3.13371	-3.79458	-3.93384	-3.32433	-1.84038	-1.6577	-3.56961	-3.32064	-3.36126	-3.48079	-3.80006	-4.00165	-3.28936	-1.92703	-3.74835	-2.78902	-3.60011	-3.68599	-3.4913	-3.856	-3.564	-3.5298	-3.9544	-3.90883	0.28515	0.0853647
SERPINA7	no	no	2.7155	2.95951	2.53344	2.70295	3.21029	3.22153	3.67392	4.82899	4.70886	4.98223	4.38319	4.72423	3.88931	4.73836	5.51461	5.17692	0.195351	4.07323	5.93609	3.14978	3.27853	5.24913	4.97393	1.91144	5.69043	4.2299	5.15646	4.44497	6.31903	5.20309	4.35888	3.94438	6.78383	4.51838	1.66575	1.87863e-05
SERPIND1	no	no	0.116466	-0.299893	0.064948	0.857838	0.567244	1.1528	-0.869884	4.70703	2.62658	5.37294	5.9236	4.97059	1.23844	3.06481	7.00084	7.0705	-0.809713	-0.812933	1.12231	2.73007	-0.975982	4.92544	6.11047	0.687943	6.67175	4.07458	3.58517	1.01545	5.99404	5.78212	2.91539	4.62855	4.78363	4.54145	3.2616	7.30345e-06
ITGB1	no	no	1.23223	1.99355	-0.0442243	0.849991	-0.718435	1.85871	0.809968	-0.485231	-0.584897	-0.0969757	-2.07134	-1.53131	0.860395	0.75145	-1.64584	-1.29998	2.30225	-1.57794	-0.525612	-0.55578	0.874867	-0.361568	-0.543162	-0.0547003	-2.84782	-1.48397	0.0239313	0.599888	-1.91403	-3.01336	-0.796997	-2.07202	0.587886	-0.931638	-1.53578	0.00887106
KRT18	no	no	-3.32022	-2.21227	-2.33259	-2.66429	-2.64656	-2.72158	-3.371	4.72782	1.73034	-1.72197	-1.66328	-0.871972	-1.95486	-2.2235	1.24129	-0.432489	-2.89812	-2.40129	-1.72945	-2.81927	-2.00193	2.15011	-1.33131	-0.117827	2.65503	2.07241	0.717218	-1.56749	0.933503	-0.174947	-0.293901	-0.348075	-1.51238	-1.45683	2.03832	0.000371602
KRT8	no	no	-1.4523	-0.0887786	-0.317392	-0.512429	0.396047	0.0793668	-0.300853	6.68137	5.14386	1.46803	0.497409	1.088	1.23459	-0.332031	4.72378	2.65888	0.181502	0.377998	0.738765	0.672271	-0.105163	4.26566	-0.46156	1.74025	4.8995	3.92046	3.15741	1.7405	2.96878	2.04735	1.66116	3.12821	0.284851	1.74103	2.03153	0.000276816
CALB1	no	no	-1.26808	-1.32956	-0.586825	-1.22625	-0.354583	3.2335	-1.78647	2.96405	1.90845	3.27171	-0.98388	1.83862	3.65235	3.46328	-0.686634	0.000745612	3.01081	0.338321	3.01385	-0.799567	5.65038	3.22043	2.12199	0.00241932	-0.704057	2.54597	1.82239	4.53502	1.24276	1.4642	1.94942	2.19685	5.30624	2.76853	2.12144	0.0170179
MYL1	no	no	-1.95426	-2.0103	-2.68695	-2.56122	-2.40615	-1.6779	-2.24754	-2.45836	-1.4908	-2.17485	-2.49318	-2.77651	-2.25982	-0.888121	-1.88072	-1.96844	-2.43394	-1.36487	-2.31435	-1.66867	-2.2429	-1.35347	-2.60857	0.746918	-1.94774	-2.0267	-1.97391	-1.86268	-2.05912	-2.065	-2.32952	-2.22738	-1.29186	-1.79821	0.17331	0.440276
HPN	no	no	-2.21279	-2.00402	-2.49126	-2.1714	-2.52862	-1.00185	-2.61668	-0.508606	-0.742656	-1.72392	-2.02671	-2.62913	-0.809547	0.115811	-2.62651	-1.93959	-1.90993	-2.59692	-0.662047	-1.2835	-1.04644	-1.41387	-1.22728	-2.29956	-2.93706	-1.63541	-1.05101	0.431926	-1.80112	-2.36912	-1.09263	-2.54992	-0.869564	-2.23875	0.74738	0.0453946
COL5A2	no	no	-2.25714	-2.3938	-2.46185	-2.51325	-2.47891	-1.55538	-2.20216	-1.12706	-0.932643	-2.27319	-2.27189	-2.48479	-0.724276	-2.67218	-2.27299	-2.46512	-2.44563	-2.35777	-0.969968	-2.26597	-0.17977	-2.42545	-2.63039	-2.60761	-2.73668	-2.70665	-3.12301	-0.309392	-2.5564	-2.56177	-1.38219	-2.56821	-2.05885	-1.11052	0.345892	0.227146
UROD	no	no	-4.8156	-4.11928	-4.33941	-5.08975	-4.50988	-4.64654	-4.25025	-4.25829	-3.73718	-2.56109	-3.6023	-2.13226	-4.61249	-4.29275	-3.17593	-4.43431	-4.91723	-4.74117	-3.32063	-4.3461	-4.39329	-4.53763	-3.37838	-2.96805	-3.32368	-0.502846	-4.74717	-4.34606	-4.44534	-4.55771	-4.67491	-3.88749	-5.16444	-3.69083	0.836306	0.00620658
INSR	no	no	-4.51465	-4.68801	-4.77296	-4.73431	-4.87828	-3.16368	-4.64039	-3.54452	-4.64689	-2.87059	-4.86561	-4.82398	-2.2506	-2.47335	-4.6097	-4.92514	-2.18495	-4.89922	-4.53743	-4.56239	-4.96179	-3.46879	-3.90001	-5.35647	-4.44226	-4.75419	-4.8849	-2.02089	-4.12895	-4.57011	-4.35111	-4.77187	-4.83576	-4.50574	0.185162	0.618233
BCHE	no	no	-0.166272	-0.207895	-1.31588	-0.567757	-0.393097	-1.19762	-0.349194	2.65494	0.783432	3.73583	4.04799	2.90482	1.8676	1.53705	3.58278	4.40225	0.396478	-0.488754	-0.514102	1.13621	-2.10591	4.11668	3.35615	0.441687	3.50596	2.33874	1.35627	-1.15572	3.24045	3.57736	1.20787	2.55823	2.73601	4.13909	2.07664	3.37908e-05
GLA	yes	no	-0.724447	-0.527996	-0.378845	-1.53657	-1.22349	2.65275	-0.628592	2.44253	2.97432	2.5476	-1.62349	1.26224	0.660376	4.03582	-1.40624	0.788624	0.26996	-1.74323	3.55387	-0.305692	2.72123	1.8088	2.38923	2.02201	1.48414	3.01008	1.12268	4.40557	2.55859	0.328932	1.93484	-0.166783	3.19684	0.776651	1.90515	0.0194931
IGKV2-30	no	no	-2.05797	-2.86764	-2.17795	-2.01751	-2.14699	-1.68392	-1.72925	-2.34078	0.477211	1.87402	1.28222	0.805575	-1.51169	1.412	-0.862034	0.104016	-2.15812	-2.46438	-2.36586	-1.57548	-2.14032	1.02211	-1.04222	-2.80852	1.50009	0.376262	-3.15411	-0.479658	2.60841	1.91384	-2.33746	-1.7097	-0.928869	-0.126911	1.42796	0.00189235
IGKV4-1	no	no	-0.621389	0.163268	-0.922374	1.51242	-0.51037	3.62365	0.246727	7.4614	8.46138	7.90825	6.88376	7.87745	7.10297	8.49807	7.94229	7.74409	6.29286	8.03613	8.60179	8.26071	5.86962	8.03413	7.79695	7.15523	8.00034	7.87776	8.31539	9.36651	8.01481	8.291	8.42998	7.70458	8.08531	7.8271	7.34707	6.32035e-05
IGKV5-2	no	no	-3.88969	-4.03928	-2.9442	-4.07055	-4.00294	-3.78122	-3.95121	-2.98554	-2.76532	-1.94185	-4.56413	0.196035	-2.83322	-2.96669	-0.852769	-1.61286	-3.24854	-3.24933	-1.44627	-3.23803	-2.19068	-2.23257	-3.10479	-3.09641	-1.70037	-1.95705	-2.36001	0.601631	-3.61062	-1.00535	-3.02745	-2.52524	-1.72631	-3.62975	1.18673	0.000343738
IGHV4-34	no	no	0.378254	0.326237	0.275914	-4.43922	0.332101	-3.50985	0.65323	2.74543	4.11736	4.79407	5.0455	5.42962	1.90639	3.39601	4.88112	5.67022	-0.19405	1.83122	2.34433	2.55661	0.391335	3.81922	4.68528	2.31027	5.15313	4.16412	2.47366	1.9976	5.33766	5.62883	4.07791	4.57644	4.45267	4.23938	4.43198	0.00311013
GSN	yes	no	4.12272	4.0365	4.01069	3.50708	3.79387	1.2972	3.93578	6.74189	7.33908	6.68008	6.55017	6.01673	5.53663	6.86032	6.54797	7.63179	2.21173	5.5859	7.52263	6.25703	2.9964	6.89459	5.2847	5.86325	6.72574	7.30356	6.65901	7.25303	7.22054	6.5387	7.7029	6.39943	6.10573	6.753	2.89936	0.000183312
PTMA	no	no	4.21468	5.31436	3.41952	3.70971	2.92134	6.13388	3.62422	4.10909	6.22247	4.89816	4.29593	3.11456	6.00703	5.33218	2.21533	1.90212	6.00271	5.04741	5.85825	5.59481	5.52425	4.93688	4.39825	6.29531	2.70261	5.52358	4.9398	6.03602	2.78405	2.61949	5.31848	4.48118	7.38225	4.63584	0.556233	0.358529
ATP5F1B	no	no	-4.07046	-3.53635	-4.15495	-4.32415	-4.26919	-3.53593	-3.71607	-2.50802	-3.03406	-2.46144	-2.97202	-3.67949	-4.56131	-5.00998	-1.59539	-4.22444	-3.98654	-3.97202	-2.82757	-3.13389	-3.90472	-4.06038	-4.39129	-1.28492	-4.52215	-2.25852	-4.14619	-2.50162	-3.69322	-2.56299	-0.976421	-3.04527	-4.09377	-2.98829	0.644829	0.00810379
C2	no	no	1.29145	1.03038	1.14494	0.780962	0.904206	1.57488	1.38921	2.32399	1.98012	4.04117	4.01647	3.963	0.302439	1.6019	4.58285	5.05904	0.1762	0.921769	0.401725	1.25606	1.072	4.40157	3.38149	2.23101	4.28321	3.39917	2.35297	0.24467	4.57187	4.71355	1.70821	3.75514	1.45349	1.41128	1.81501	5.97749e-05
S100A9	yes	yes	3.08133	3.48725	3.16736	3.60352	2.88472	3.90424	2.41447	3.44715	5.63413	5.07137	8.24252	7.18617	5.82867	4.47875	6.82171	6.06702	2.09208	5.13191	4.29658	4.92452	2.87132	4.61502	3.76673	6.8682	5.45161	6.45823	4.20929	2.95867	3.93623	5.31436	5.3029	6.95195	5.5119	6.17892	1.98304	3.36379e-05
S100A6	no	no	-2.09451	-1.97739	-3.00425	-2.3468	-2.28216	-1.76076	-1.70007	0.218283	-1.55353	-0.0980774	2.84748	1.75146	-1.65274	-1.97375	1.02648	-0.886599	-0.424461	1.21234	-0.0836421	1.34893	-0.379652	-2.13785	-2.00547	-2.35797	0.611504	2.21019	-2.5943	-0.732582	-0.6797	-0.288201	-0.701224	1.29523	-0.4891	0.632737	1.66922	6.89023e-05
APOA4	no	no	1.01941	1.93132	-0.161745	0.400425	0.870147	1.79828	0.0399989	4.50601	3.01104	5.13265	5.86534	6.25773	2.3592	1.0155	4.51706	7.87125	0.164533	1.54312	0.720285	3.58517	-0.239926	4.61972	2.28905	3.2661	6.55199	3.82949	3.5524	1.66511	5.88626	6.0628	5.20642	3.97203	0.435716	2.37698	2.95089	8.88808e-06
EIF4E	no	no	-3.81398	-3.37923	-3.65159	-3.78255	-3.14864	-3.45736	-3.0596	-2.27303	-0.916207	-3.4954	-0.311049	-2.26308	-3.36839	-3.79668	-1.27458	-2.92283	-3.43691	-3.62619	-2.01794	-3.69552	-3.87412	-3.67971	-3.64342	-1.83934	-3.14126	-0.947279	-3.80506	-3.43895	-3.61823	-2.88611	-3.72488	-0.915465	-3.1794	-3.27281	0.805764	0.00633458
CEACAM5	no	no	-0.100311	-0.256018	0.289467	3.48625	0.896392	1.68448	-0.296627	-0.199959	1.95887	0.774287	0.544053	1.67463	0.929158	0.765919	1.32769	0.89993	2.02865	0.319484	-0.248912	1.19976	0.00255476	2.14873	2.40793	0.400772	0.544795	0.130986	-0.358349	1.16777	0.240017	0.0842572	-0.558312	1.72808	2.01997	0.868508	-0.0279881	0.969547
ENO1	no	no	-0.0166159	1.06686	0.597179	1.12243	1.30126	1.16773	0.256968	4.87046	5.43521	4.79873	5.95528	6.47614	3.15499	2.48053	4.01666	5.78544	1.5155	4.87143	5.90833	3.05372	2.16748	2.648	3.52095	3.37682	5.06132	5.45716	2.10612	2.52296	3.72381	4.56072	4.30473	6.2043	3.30885	3.64221	3.01906	1.19452e-05
FCER2	no	no	-0.810753	1.88534	-2.75347	-0.953371	-2.71054	0.866842	-3.37742	-0.604492	-1.5289	-1.5178	-2.88935	-2.09577	1.81375	-1.75433	-1.91265	-2.44714	0.304543	-1.50368	-1.70029	-2.61718	-0.166054	-1.80871	-1.33804	-2.11763	-3.16048	-1.1897	-1.06874	-0.219585	-2.20153	-3.23996	-1.08201	-3.12543	0.531816	-1.49333	-0.276472	0.796884
PYGL	yes	no	-2.6978	-2.22196	-3.10086	-2.51458	-2.65704	-3.69742	-1.69391	0.649941	1.30423	-1.29953	1.99462	3.57896	-2.58849	-2.3247	2.00943	2.14899	-2.27617	0.713991	1.5567	-2.75279	-1.99776	-2.04358	-2.62204	0.837258	1.29798	-0.383321	-3.04195	-3.01439	-1.21931	-0.155212	0.0238006	2.91463	-1.70828	-1.62041	2.03838	0.000152391
GPI	yes	no	-1.38561	-0.507792	-0.718825	-0.335287	-1.61865	-0.109502	-0.994076	2.69308	3.98041	2.34012	4.30158	5.56545	-0.216955	-1.06881	4.91555	4.2525	-1.56453	3.32569	3.4296	-0.197605	0.178803	-0.0690424	-0.0191046	1.41393	3.54565	3.03526	0.0134536	0.133285	1.35307	2.61488	2.23506	5.81688	0.964213	-0.275487	3.00049	7.27947e-06
TPM3	no	no	1.40246	0.00454394	0.876568	0.298437	-0.795806	1.9903	0.532746	4.27529	3.9561	3.17209	5.69855	3.99759	3.01981	0.685443	3.92827	3.30432	0.645376	5.18842	1.75074	3.15445	1.62949	2.4615	1.75245	4.8311	3.90853	4.47361	1.54266	-0.518999	1.19125	2.91705	2.40022	4.16288	4.0783	4.79875	2.51885	7.34937e-05
HEXA	no	no	0.137165	0.249472	0.439804	0.587799	0.398056	3.76941	-1.55772	2.74539	2.60072	2.7778	0.0356359	3.88122	2.89402	3.64981	0.0461526	1.10072	3.95526	0.382634	3.26743	0.067315	3.14856	1.63786	2.72519	4.09048	1.47186	3.00058	1.8506	3.78222	2.02701	1.53131	2.70108	1.87455	3.2656	2.08537	1.95736	0.0327695
KLK1	no	no	1.724	1.81262	-0.154882	2.36614	0.817174	6.58478	1.29346	4.1247	5.15052	5.94889	1.61715	4.31918	7.18504	5.93035	1.36965	5.89312	7.99723	4.5877	5.90845	4.18365	7.70493	4.7689	5.92744	3.18052	4.86362	3.59571	0.957267	4.3979	4.51202	5.59919	4.34333	3.4048	6.10627	5.0716	2.70145	0.0249674
H2BC11;H2BC17;H2BC3;H2BC21;H2BC26	no	no	-4.29829	-3.6088	-3.23332	-3.78766	-2.97356	-3.50388	-1.71599	1.23199	0.403071	-3.80068	-3.27962	2.09931	-3.45593	-4.37888	2.95039	1.63764	-3.20993	-3.40467	-4.25292	-2.48352	-0.126464	-4.10958	-1.72985	-1.73632	-1.46582	2.42172	-0.656698	-2.82083	-2.06186	0.274502	-1.96262	3.08314	-2.70051	-2.12355	1.86945	0.00259913
SERPINE2	no	no	-4.15851	-3.07117	-1.55479	-1.78977	-0.590884	-2.05549	-2.83747	1.40531	0.484704	1.08734	1.97803	4.04271	-0.549718	-0.666856	5.69394	-1.72281	-3.0628	-3.53357	-1.5552	0.000322414	-2.75146	1.16052	-0.556739	0.816541	4.2469	1.94455	0.316986	-3.65621	-1.23048	-2.30528	2.2191	4.74477	-2.38405	-3.20484	2.30111	0.000489788
DBI	no	no	-0.819444	-1.83108	-1.85152	2.95908	-1.26524	3.92066	-1.77225	2.75475	3.15812	2.27114	2.53971	2.16952	2.70548	1.73785	1.02783	0.494392	0.983903	0.714766	2.61684	1.12049	3.12567	1.48776	1.51771	2.63939	1.15235	1.80531	0.44934	2.64522	0.397903	1.88386	0.94365	2.4986	2.29723	2.49755	1.93264	0.116736
FABP1	no	no	0.390473	1.15368	-1.14238	0.463171	-0.45762	2.07314	0.0498622	1.65401	5.14361	3.01834	-2.13109	3.03263	0.496718	2.3709	4.90956	-0.820684	0.920136	2.29048	4.05422	2.44634	0.909583	3.55908	1.64476	2.50652	0.314777	3.96102	2.57277	4.41587	0.919934	-0.248506	3.96325	3.3084	3.69691	1.6979	1.88458	0.00196018
LDHB	no	no	0.708833	0.97233	1.13309	-0.502935	0.174713	-0.25625	-1.00598	4.47874	4.76622	3.84821	3.38281	4.84963	1.73068	1.48063	2.39315	2.3223	0.029383	2.65125	3.94015	2.1545	2.63784	1.96827	2.83184	3.82619	2.43771	4.09745	1.62663	3.6997	2.59902	2.62395	2.31009	4.08603	4.10712	3.16243	2.80357	4.20215e-05
GPX1	no	no	-3.33703	-3.69924	-3.86152	-3.9871	-4.11562	-3.71639	-3.73687	-2.15214	-3.00512	-1.68633	-1.03753	-2.77104	-3.68752	-3.91443	-2.58759	-4.07031	-3.76937	-2.42599	-2.92328	-3.70823	-3.81443	-3.28113	-2.99908	-2.71743	-2.41837	-1.09939	-1.80474	-2.6026	-3.01853	-4.05179	-4.16495	-1.81104	-3.96733	-3.62524	0.759144	0.000625667
THBD	no	no	-1.6306	-2.12145	-2.6184	-1.76323	-2.18792	-2.60845	-2.50962	-0.198568	-0.0391239	-0.339138	-2.28669	-1.56796	0.586738	0.498022	-2.17146	-2.56732	-0.46124	-1.63491	0.135935	-0.72297	-0.753275	-0.71405	-0.396017	-2.02876	-1.97445	-1.60512	0.253199	0.0128473	-1.84248	-2.18488	-0.72255	-2.29767	0.366419	-0.65284	1.01009	0.000451568
PROS1	no	no	0.233358	-0.168146	-0.25632	-0.696826	-0.679183	-0.891821	0.858961	1.43023	0.576066	2.51382	3.12564	2.7591	1.18312	1.93038	3.66974	4.37419	-1.47975	-0.0816429	-0.0218893	1.60995	-0.636515	4.10411	2.57745	1.30727	2.07788	1.48706	0.370278	-2.07169	1.48276	3.30684	0.239032	1.75486	2.5981	3.11503	1.96427	0.000458144
P4HB	no	no	-0.801649	-1.20782	-0.814557	-1.04897	-0.602584	-0.460181	-0.698708	3.42823	3.35097	1.03172	-0.200357	1.93833	-0.859211	-0.302601	0.734968	1.24257	-1.95506	0.336501	0.87906	0.70072	-1.70341	0.88228	-0.354825	1.78019	0.627836	1.69046	1.20688	0.522987	0.188993	0.694284	0.500401	2.31773	0.389011	0.890401	1.57669	2.72921e-05
KLK3	no	no	1.49121	-3.88042	-1.73597	-4.17421	-3.04154	-3.99162	-4.49309	-3.89415	-3.97209	-4.19108	-3.76277	-4.47721	-3.85785	-2.87435	-5.73573	-4.40116	-2.61383	-3.82261	-4.34844	-2.7276	-4.42044	-4.38506	-4.16309	2.90223	-3.70746	-2.0373	-2.83733	-3.97321	-3.68101	-4.49282	1.65165	-3.08557	-3.99254	-3.31282	-0.517236	0.628935
H1-0	no	no	-4.81021	-4.15708	-4.55066	-1.72224	-5.39514	-4.17052	-4.73559	-5.16975	-1.17373	-0.277712	-3.54035	-2.37096	-2.83429	-3.71989	-3.67876	-0.0402439	-4.37506	-4.04214	-4.03619	-3.62595	-2.58046	-4.27752	-4.95357	1.31662	-3.65581	-4.16519	-4.64918	-3.7411	-4.64275	-3.85343	-4.27153	-2.29422	-2.28955	-0.288269	0.976848	0.120562
ASGR1	no	no	-2.73653	-3.44078	-3.7142	-2.73531	-3.44787	-3.64736	-3.16364	-0.963363	0.317294	-2.30302	-3.57062	-2.32314	-2.84122	-0.700124	-3.53455	-2.89017	-3.56229	-4.10706	-0.746526	-1.41213	-3.21418	-1.48434	-1.77848	-0.883237	-3.28055	-0.546468	-0.729972	2.46819	-3.22323	-3.23352	-1.7372	-0.779061	-0.726536	-1.6999	1.87864	1.0102e-05
ASGR2	no	no	-2.24397	-2.6994	-2.18932	0.725713	-2.96345	-0.434742	-2.46296	-2.01315	0.260487	-0.551996	-2.67549	-2.1316	-1.25723	0.358979	-2.43757	-1.30111	0.971892	-2.78959	-0.728454	-1.12492	-0.718497	-0.463281	-1.07176	-0.157829	-1.35915	-1.49553	-4.22105	1.00324	-0.610629	-1.345	-0.461884	-1.34417	0.493563	-0.707411	0.522956	0.398456
ACYP1	no	no	-3.79886	-3.9927	-4.10133	-3.86767	-3.94673	-3.36466	-4.09138	-2.62442	-2.99492	-2.68257	-1.89787	-2.6452	-2.94023	-4.88454	-2.70576	-3.8088	-4.52533	-4.45251	-2.39753	-3.6604	-2.8959	-3.37871	-2.61723	-0.199585	-2.86147	-0.905956	-4.20607	-3.35679	-4.17954	-3.69071	-3.22509	-1.71289	-2.30513	-1.95534	0.950733	0.00472728
CSF1R	no	no	-1.17515	-1.44099	-0.985427	-1.38126	-1.69356	-1.59921	-1.49256	0.541853	-0.853301	1.01837	-0.264269	0.512204	0.503761	1.36151	0.786739	1.14281	-0.430111	-2.28389	0.78884	-1.47747	-0.82101	0.890183	0.0769188	-3.22942	-0.0985468	0.292631	-0.773951	0.8881	0.330152	0.276935	-1.01328	-0.936656	3.18937	0.951484	1.31516	9.45259e-05
CTSD	yes	no	-0.0794001	1.30621	1.49867	-1.13856	-1.37976	-1.2927	0.589877	5.26859	5.81503	5.72054	1.73185	6.9865	3.60114	6.43581	3.96389	4.18675	1.22474	2.35396	5.18897	3.83722	2.34486	3.68347	5.17128	6.45348	5.11645	5.84106	4.08421	6.4544	4.96317	4.74151	4.68505	5.00797	5.73229	4.29753	4.68522	2.7733e-05
ANXA2	yes	no	-2.57914	-1.56676	-1.09647	0.149938	-0.837198	0.495836	-1.87422	-0.060613	0.131469	2.45045	-0.186294	1.07261	1.2202	1.12016	-0.555266	-1.58447	-0.0718268	-1.20821	0.306171	0.0599105	-0.0858109	0.771948	-0.616892	1.50745	-1.36788	0.893182	0.769024	0.39704	-1.66826	1.8759	-0.786989	-2.26203	0.0919295	-0.00451983	1.23843	0.0467496
C8A	no	no	0.146955	0.102437	0.20263	-0.146532	-0.74201	0.302425	-0.0483108	2.55888	2.26774	4.3784	4.17916	5.12766	0.711169	3.58426	4.90263	5.57034	-1.46695	-0.392769	-0.44517	1.68027	-1.08918	4.43519	3.82308	1.97346	4.40512	3.25002	2.55048	-0.501494	4.63526	4.77526	1.63486	4.37063	0.792196	2.48053	2.18047	0.000490932
C8B	no	no	-1.04121	-1.31273	-0.961322	-0.34032	-0.639501	-0.956432	-1.09119	0.49559	0.510743	0.417195	2.35208	3.3797	0.419469	0.25422	3.19554	3.83521	2.70172	-1.03605	-1.12229	-0.225644	0.994051	2.13585	0.971861	0.348577	2.77159	1.42275	0.859823	-1.51936	2.45591	3.0136	-0.130497	2.86359	-0.936672	-0.707807	1.77964	0.000203097
GP1BA	no	no	-0.497925	0.435638	-0.251109	-0.769052	0.0565148	-0.822701	0.588755	1.86577	3.10048	2.11222	0.770306	1.81893	-0.750712	1.74715	0.21106	1.43638	-0.304673	2.4968	4.03925	1.15413	-0.411856	2.66603	0.418541	-0.610324	0.267925	1.83486	2.13073	2.59516	0.906808	0.35391	2.39529	1.69714	4.51936	1.44311	1.51188	3.05098e-05
C8G	no	no	0.802773	2.30684	1.79012	1.49265	0.90961	0.505896	1.12033	3.5806	3.34049	5.0295	5.1053	6.13332	1.99475	4.02218	6.02801	6.34368	0.409669	0.384331	1.78418	2.70419	-1.04535	5.30022	4.79889	2.08143	5.29752	4.15332	3.36744	3.80434	5.82697	5.7659	3.2586	5.13417	1.97099	3.71804	2.21843	2.85109e-05
CAPN1	yes	no	-1.93504	-2.55438	-2.07135	-3.00915	-1.23845	-1.99369	-2.28024	1.77198	1.78066	0.455193	1.01567	2.70543	-1.31221	-1.92164	1.62764	0.577308	-3.16128	0.0297195	0.74102	-2.49075	-1.20335	-0.743758	-1.48153	0.812107	0.805761	1.34993	-0.769199	-1.69103	-1.00258	0.220553	-0.576708	2.3757	-1.27757	-1.1446	1.93832	3.74406e-05
TUBB	yes	no	-1.87878	-1.45529	-2.25399	-1.20103	-1.40741	-1.75116	-2.08421	2.2695	1.32389	0.0294409	1.20106	0.317131	-1.44651	-2.33676	0.32272	1.25811	-1.06322	0.403534	1.56613	-0.776661	-1.67065	-1.68892	-0.196486	-2.54042	1.27737	1.06361	-2.14342	-0.295473	0.4441	1.08366	-0.203367	2.04621	-0.00254635	0.264768	1.44697	0.00011489
CA3	no	no	-5.19298	-4.97113	-5.04334	-4.55858	-5.0647	-3.9094	-4.23017	-4.21282	-2.75952	-4.57811	-3.98861	-2.41812	-4.57943	-4.30531	-3.91463	-4.21745	-4.30144	-4.22957	-4.0662	-4.37773	-3.76185	-5.0471	-4.33484	-4.23403	-5.12985	-0.361523	-4.43493	-4.0288	-4.63871	-4.37622	-1.65759	-1.70745	-4.78072	-3.25229	0.592902	0.0410363
IVL	no	no	-0.690068	-1.73251	-0.905008	4.19589	1.54968	5.35297	0.697945	2.34049	2.65169	2.20686	0.864968	-0.388335	0.100612	3.06655	-1.04999	-2.32329	-1.18728	-0.258769	1.35999	0.34828	0.518476	3.16911	-1.32936	-0.131746	-0.364775	-0.295671	0.0900465	0.929126	-1.33286	0.941706	-1.26646	-1.96296	-0.358052	0.623038	-0.703211	0.618984
PRSS2	yes	yes	2.62712	1.43141	2.10904	2.30627	8.55954	7.90957	2.00342	5.28637	7.3571	5.3668	5.01701	3.56978	0.165635	4.11415	8.03643	3.87166	6.50711	6.39237	4.64847	6.34178	2.86488	3.95851	-1.61597	2.49254	1.93866	6.03208	5.64564	6.39633	1.39908	2.58465	5.86527	7.2017	3.24491	4.32171	0.782212	0.626478
DCN	no	no	1.64073	0.930503	-2.39106	-0.74552	-2.06563	1.53349	-0.339457	0.440248	0.485207	0.0280647	-1.56889	-2.94134	-0.765962	-1.07456	-2.25714	-1.11073	0.723068	-3.652	-0.0672523	1.03574	1.60356	0.181871	-0.353055	-0.349128	-1.72847	1.10148	0.337217	0.836255	-0.582789	-1.35909	0.255966	-0.780271	0.818951	-0.74187	-0.55762	0.373023
PSAP	yes	no	6.51342	8.04763	6.39122	9.47662	8.10535	9.40329	6.7354	9.51026	9.13631	8.95252	6.83915	8.07503	10.32	10.0325	5.73529	7.95455	10.0145	5.71142	10.9858	8.6088	8.97584	8.87545	9.39016	8.13397	7.4827	9.2595	8.80775	10.0067	8.63382	7.40842	9.28587	7.18422	10.9601	8.98269	0.90304	0.183709
HEXB	yes	no	-1.03408	-0.588507	0.525935	1.55529	-0.0540103	4.03215	-0.268138	3.1366	3.24704	3.47557	0.4929	4.49344	3.39356	4.39702	0.0794578	1.42463	5.07762	1.71653	3.88591	1.68753	3.72336	2.8111	3.05482	4.97131	2.31352	3.02963	2.51448	4.26888	2.32628	1.63352	2.98152	2.46963	3.82621	2.37286	2.10052	0.0273383
CTSL	no	no	0.0769831	-0.497954	-0.0540991	-1.74375	-0.397002	-1.6685	-0.358299	1.5739	1.76008	1.9019	-0.128126	1.59351	2.30197	2.31973	-0.23281	-0.0102518	0.58163	-0.379682	1.90471	1.29194	1.86262	0.919381	2.04037	3.14989	0.459021	1.66527	1.34516	2.21195	0.832621	0.179078	1.53352	-0.501193	2.17569	1.12902	2.06623	7.27489e-05
PFN1	no	no	1.45736	2.3023	1.66873	-0.655141	1.03221	0.929879	-1.44823	5.89122	6.01234	5.35859	7.38055	6.60314	4.25207	3.27416	6.13311	6.51502	0.592866	6.33428	6.0989	5.48284	1.89004	3.37595	3.74119	5.9334	6.18007	6.69906	2.75718	4.09096	4.79885	4.95087	5.44434	7.67608	5.71551	5.35051	4.42701	7.53286e-05
BPGM	no	no	-2.75531	-2.46961	-2.39736	-2.08851	-2.92452	-2.60271	-1.92477	0.823839	1.56763	0.549644	-1.37832	0.0522796	-2.04649	-2.4106	-0.862131	-0.842863	-1.93608	-0.229855	-0.00882674	-2.13783	-0.0592907	-1.738	0.627073	1.20439	0.794505	3.42156	-0.954154	-2.63973	-1.58323	-0.908033	-2.33079	0.131766	-2.37388	0.228903	1.7006	0.000210958
APRT	yes	no	-2.27695	-1.79416	-1.68957	-2.69259	-2.55655	-2.32359	-3.05995	-0.825338	0.373988	-0.599091	-1.27634	-2.13259	-1.34055	-2.57743	-0.532257	-1.50383	-1.87473	0.329676	1.62765	-1.11513	-1.4538	-3.74996	-0.932014	-1.60915	-0.354344	0.158025	-1.56104	0.298705	-1.89405	-1.63862	-0.762276	0.464035	0.0185064	-1.51258	1.43572	1.84369e-05
EPRS1	no	no	-3.43034	-3.80688	-3.76531	-3.62326	-3.62718	-3.73561	-3.59155	-2.85812	-3.01427	-3.55319	-2.83576	-3.82843	-3.54375	-3.69491	-2.91236	-3.66971	-3.80251	-3.82483	-3.72273	-3.67283	-3.65379	-3.78209	-3.95765	-3.64904	-3.69273	-3.93749	-4.02567	-3.7804	-3.81402	-3.68657	-3.72042	-2.74211	-3.82677	-3.78852	0.278903	0.0230334
CTSB	yes	no	1.76513	2.39548	1.2191	4.54004	1.13268	5.55872	1.48487	4.17017	5.99697	5.27539	2.81724	6.26887	5.64046	6.73002	2.71807	3.74649	6.59949	2.39406	5.68199	4.88671	4.36797	4.79472	4.92595	5.81785	4.41029	5.63058	4.74047	5.95188	4.22131	3.66872	5.11762	3.52186	5.28869	3.89027	2.01563	0.0308833
HSP90AA1	yes	no	-2.26647	-2.63582	-2.54988	-1.72023	-2.64323	-2.51828	-2.02945	1.69985	1.78003	-0.0978896	0.933941	-0.0494451	-1.70371	-2.79037	0.921526	0.5489	-2.79478	0.1126	-0.181024	-1.07624	-2.10803	-1.19462	-1.05029	-0.685283	0.411702	0.72102	-1.57819	-0.811396	-1.96619	-0.330635	-1.539	2.23324	-1.16474	-1.20529	1.77366	1.61873e-05
HNRNPC	no	no	-1.63249	-2.62678	-2.50479	-2.66018	-1.56052	-2.12374	-2.12264	1.52936	0.549163	-0.188999	-0.375204	0.131052	0.678358	-2.09499	2.18954	-0.30145	-2.62313	-1.48265	-0.0631497	-0.0714244	-3.12585	-1.88849	-2.8927	-1.30634	0.459995	1.28298	-1.25387	-1.49483	-0.16071	0.511078	-0.682142	2.38847	-0.626959	0.427558	1.66706	0.000133367
UMOD	no	no	6.3129	5.20101	3.7626	7.08753	4.45519	9.87433	7.4343	9.94549	9.72802	7.36015	3.56999	6.53137	9.22512	10.3825	4.61291	6.81507	9.07209	11.541	7.84532	6.48967	12.2496	7.09017	8.74619	6.61049	6.78951	5.95743	8.09164	8.63657	7.3171	6.17702	7.99684	6.08626	8.03265	8.39977	1.52194	0.153952
UQCRH	no	no	-4.31608	-4.32524	-4.27027	-4.66589	-4.67837	-4.53362	-4.8666	-3.69108	-2.63461	-2.08327	-4.84523	-4.64269	-4.50165	-4.43547	-4.6914	-4.40747	-4.35004	-4.23395	-2.75734	-4.25362	-5.1868	-4.94373	-4.91449	-2.97441	-4.85493	-3.53134	-5.03509	-2.6797	-4.33035	-2.99562	-4.56641	-4.83353	-3.61562	-2.83649	0.431194	0.051604
LAMB1	no	no	-1.94768	-2.12992	-1.97833	-2.44201	-1.80555	-1.84521	-1.90801	-0.451573	-0.466273	-0.485096	-2.54196	-1.30134	0.223678	-0.227784	-2.2614	-1.52468	-0.96275	-1.78278	0.754978	-1.40391	-0.917639	0.0490929	-1.30538	-1.37266	-2.1252	-0.19938	-0.655584	-0.00736024	-0.622946	-1.29593	-0.153289	-2.43793	0.30954	-0.799615	1.11203	1.22502e-05
YES1	no	no	-2.71431	-2.88247	-3.06999	-2.77045	-2.7593	-1.67968	-2.23316	-0.970567	-1.84723	-2.05287	-2.94621	-2.40042	-1.9112	-1.58477	-3.13103	-2.52596	-0.513319	-3.14638	-2.596	-2.87938	-2.13933	-2.27801	-2.01869	-2.05552	-3.05889	-3.40834	-1.5686	-1.16179	-1.73861	-2.76839	-2.44752	-2.72247	-0.976911	-1.63096	0.30534	0.20163
LYN	no	no	-3.53378	-3.12302	-3.25928	-3.20962	-3.15014	-3.43048	-3.39955	-2.03092	-2.84359	-2.60015	-3.49507	-1.85417	-2.79531	-2.63337	-1.94663	-2.01076	-1.52015	-2.91077	-3.35545	-3.10921	-3.40104	-2.68282	-2.16896	-2.62092	-3.09045	-2.92458	-3.1925	-1.9783	-3.11216	-2.45504	-3.45764	-2.08138	-2.57095	-2.70497	0.658855	0.000286743
FH	no	no	-4.91577	-4.7323	-4.42197	-4.87298	-4.4306	-4.65105	-4.20735	-5.22952	-4.23344	-3.97927	-3.89254	-3.49097	-4.52415	-3.09173	-3.04265	-4.16616	-4.50692	-4.89205	-2.91958	-4.2191	-4.49408	-4.17868	-1.94687	-4.072	-4.20055	-2.68495	-4.72015	-4.36989	-4.13854	-4.26311	-4.29876	-2.37309	-4.31913	-4.42259	0.501303	0.0426277
SFTPB	no	no	-4.87454	-5.21876	-4.65775	-5.05306	-4.93226	-5.15341	-3.81672	-4.52252	-4.45741	-4.39347	-3.16835	-4.60731	-4.85347	-4.5149	-3.49736	-3.18343	-4.90323	-4.20586	-4.23253	-5.14436	-5.27587	-4.98561	-5.14338	-4.12151	-2.4243	0.601376	-2.25746	-4.20911	-4.86831	-4.87121	-2.8016	-4.86383	-4.45735	-4.97236	0.42862	0.193914
THBS1	no	no	2.08503	2.14126	1.99271	1.80588	1.65313	5.16763	2.09026	3.18024	4.03234	3.89293	3.88501	2.12578	2.9521	3.89072	1.90235	4.16416	2.47173	1.29338	2.94057	3.10402	2.24437	3.22438	3.48094	4.80291	3.86807	4.88401	2.50535	4.4492	3.7883	3.82394	3.02197	3.29297	2.72944	2.64138	0.772527	0.194926
RNASE1	no	no	4.32195	3.6945	2.25638	3.95358	1.54221	4.46457	3.41363	2.55657	4.85415	3.69785	-0.848941	2.18506	4.19794	4.31197	-0.189835	0.655086	4.55927	2.3976	4.24123	2.96709	3.19566	3.84008	3.05378	3.85971	0.260502	2.88793	3.51169	4.75926	1.77455	1.10485	4.25765	2.23224	4.05097	3.07405	-0.509676	0.399266
MSMB	no	no	3.82052	0.397337	0.402961	0.93785	-3.24396	-4.76592	-5.17805	-4.27207	-2.2953	-4.64766	-4.80669	-3.79937	-2.90155	-4.00688	-3.27964	-5.54705	-5.60276	-5.80403	-0.805781	-2.31787	-5.97933	-4.53914	-5.49428	1.3586	-5.27133	-5.81915	-4.62226	-4.48877	-4.02048	-5.91465	-0.263927	-2.37433	-3.67153	-3.88	-2.53599	0.159113
COL1A2	no	no	-1.18976	-1.7118	-1.66297	-0.256312	-1.15777	1.54452	-1.51687	0.881247	0.364676	1.00615	-1.65634	-0.286613	0.166399	0.978758	-0.96824	-1.31597	1.85419	-1.66726	0.444992	1.70653	1.02105	0.37113	-0.432381	1.22653	-1.96663	1.22003	0.271389	3.76239	-0.449655	-2.77706	-0.361947	2.18174	1.77089	0.921543	1.23424	0.0671176
ANXA6	no	no	-2.85306	-2.49917	-3.10964	-2.26351	-2.51097	-2.26026	-2.47817	-0.88308	-0.665934	-2.32424	-1.12149	1.56142	-0.366057	-1.98229	1.03607	-1.8642	-2.48986	1.89266	-0.843451	-1.39068	-1.05094	-2.52903	-2.10781	0.275285	-2.75807	0.860527	-2.51082	-0.384595	-2.83052	-0.575738	-0.583767	0.290944	-0.850083	-1.88733	1.88613	9.73851e-06
RHOC	no	no	-1.60298	-0.132134	-0.403941	-0.282858	-0.33043	-0.0452528	-1.34542	2.67205	2.32491	1.737	4.37906	3.65908	1.20705	0.122796	3.24768	2.13605	0.999258	1.61863	2.21937	-0.103916	0.99585	1.04231	0.844463	1.56411	2.05127	1.99984	0.14636	1.40372	0.824907	0.998871	0.941049	3.52669	2.37926	0.858631	2.24774	3.75516e-05
NGFR	no	no	6.15014	5.75289	3.46501	5.42945	3.09416	6.16319	4.97531	3.85311	3.13086	3.50666	-0.158807	1.29115	4.93272	4.32523	-0.777266	1.51156	6.21926	1.44589	3.56933	2.96412	5.27694	3.18847	3.69617	3.65017	1.17911	2.52323	3.53388	4.35796	1.87519	1.28141	2.9778	1.5453	4.65553	2.85909	-2.10008	0.00620658
CD55	yes	no	5.96651	6.53977	5.05453	5.73133	4.60368	6.72873	5.96616	6.51081	6.6649	6.06207	2.73226	4.56073	7.93211	7.57373	2.89393	2.60692	6.64697	6.33957	7.03581	6.14672	7.3501	5.88318	5.11244	5.52957	3.32503	6.51527	6.61081	7.09254	5.60217	3.95505	5.99264	4.83411	6.9691	6.4522	-0.0604977	0.91034
ABCB1	no	no	-3.40472	-2.48029	-2.81333	-2.65041	-2.86626	-1.70343	-1.93869	-0.598176	-2.80414	-1.36753	-2.81348	-2.24596	-1.72335	-1.42424	-3.21715	-2.59544	-0.593703	-2.75421	-2.15569	-2.87786	-0.876506	-2.04766	-2.21994	-1.67616	-2.97265	-2.53865	-2.46723	-1.31735	-2.76336	-2.7765	-1.99404	-0.936425	-0.763165	-2.58697	0.652887	0.0703252
SERPINA6	no	no	1.95846	1.75682	2.14114	-1.72665	3.30309	-1.44446	1.67183	5.73294	6.23777	5.42719	5.29743	6.86513	4.5144	4.95077	7.75815	6.50323	2.91044	4.88599	6.78388	4.07988	4.55542	6.44174	5.95342	1.57954	6.62105	5.26872	6.13942	5.24537	7.64766	6.33459	5.96849	5.46768	7.52997	6.18022	4.79933	0.000526555
SLC3A2	no	no	-1.47817	-1.29087	-1.80986	-1.1415	-1.45692	-2.24208	-0.939648	2.11281	2.38548	1.64924	-0.992635	1.38012	0.407879	1.45367	-0.256281	0.321911	-0.734346	-0.455645	1.75311	-1.31338	0.0741662	0.600093	0.161032	-1.06737	-0.930941	0.700143	0.204234	0.798221	0.951101	0.60556	1.87069	-0.460915	2.03063	-0.200717	1.92339	4.71757e-06
CELA2B	no	no	-3.34042	-2.54154	-2.86997	-3.13966	-3.5548	-3.54501	-4.0181	-3.41916	0.611729	-2.3153	-3.01607	-3.62482	-3.38129	-1.46295	-2.92137	-2.81951	-3.27367	-3.79667	-1.52228	-3.29286	-2.43661	-2.3073	-2.92018	-0.753002	-2.67951	-2.0073	-1.16397	0.084531	-3.40135	-3.37314	-0.743009	1.1899	-3.72239	-3.23305	0.50548	0.1391
GUSB	yes	no	-0.125384	-0.959607	-0.517614	-0.353599	-0.947847	2.09738	-0.619667	-0.00339357	2.29221	1.90447	-1.33538	2.77403	0.881652	1.71769	0.325368	1.10818	2.21335	0.0693207	2.33343	-0.598579	2.46106	1.70327	0.625355	2.95775	0.693415	0.777551	0.831687	0.148409	-0.25711	-1.21758	2.08642	-1.18642	0.612015	0.40708	1.34922	0.0370305
HSP90AB1	yes	no	-0.014833	0.0289898	0.124116	2.27596	-0.22087	1.21413	0.596579	4.23308	3.84022	2.2218	2.66976	1.83598	1.19415	0.126482	3.82895	2.79719	0.0533654	2.45515	1.90407	1.4061	0.311567	1.23248	1.02367	1.87327	2.58667	2.70567	0.879551	1.7083	1.21996	2.11315	1.16005	4.34308	1.20445	1.21463	1.0987	0.0145761
ELANE	yes	yes	0.0192353	0.848176	-0.533045	0.491596	-0.10033	0.0236898	0.443925	1.03691	2.50127	3.45061	4.21051	8.98401	0.870884	2.79835	5.6256	4.75264	0.820438	-0.179985	2.6419	0.89731	0.169369	2.06586	0.151051	3.4866	3.98914	5.16494	2.32382	0.93535	4.49016	3.34037	2.75821	6.46088	1.53521	2.9635	2.2887	0.000155777
MMP2	no	no	-2.21158	0.641246	-1.71743	1.6623	-2.54695	1.67251	-2.25776	-0.905223	-1.33033	-0.513998	-1.31959	-0.752308	-0.811425	-0.754441	-1.56079	0.140984	1.83458	-2.33329	-2.14972	-2.49344	0.826083	-1.61403	-0.84668	0.258253	-1.78696	-0.298579	-1.67584	-0.45957	-0.993518	-0.917279	-2.1743	-1.59279	-1.23906	-1.65168	-0.308716	0.744094
MMP3	no	no	-4.49023	-4.9141	-5.01132	-5.32001	-4.53011	-4.50339	-4.82214	-3.42079	-4.33683	1.39769	-4.30808	-0.771318	-4.67967	-4.43476	-3.80296	-4.46643	-3.6297	-4.66518	-2.3119	-3.68441	-4.36088	-4.59717	-4.33154	-4.83668	-3.75038	-1.14274	-4.47906	-4.83329	-3.34306	-4.25507	-2.48968	-0.760671	-3.30194	-4.38529	0.842468	0.0379942
GSTA1;GSTA2	no	no	-2.49749	-2.27331	-2.42334	-2.65935	-2.27507	-3.37681	-3.12991	-1.87133	1.37688	0.424548	-2.22251	-1.36755	-3.38848	0.240444	1.55022	-3.30127	-2.17468	-2.9284	-0.85713	-0.825103	0.186659	-0.543453	-0.233735	-3.08402	-1.25251	-0.108131	-1.94545	0.468407	-0.967731	0.463053	0.143575	-2.25427	0.0852305	-1.89019	1.70244	3.89134e-05
SOD3	no	no	-1.90288	-1.32058	-1.30663	-2.35995	-1.28557	-2.3257	-2.22702	1.56095	2.56832	2.10161	0.128901	1.91025	1.91925	3.59332	-0.275762	1.69941	1.17316	0.198106	1.54394	-0.340317	1.78834	0.633804	1.65976	1.26764	0.699102	1.96237	3.10668	1.46815	2.38335	1.34131	2.29934	0.454227	-1.48326	-1.56433	3.29355	2.79449e-10
CTSG	yes	yes	-1.26833	-2.27441	-1.04685	-1.2228	-1.67396	-1.59678	-2.0438	-0.00706363	1.63952	-0.547547	2.89917	5.85335	-0.449682	-0.382926	1.28504	1.81829	-1.5861	-0.203902	0.919078	-0.174786	-1.77613	0.69242	-2.26271	1.69158	1.94779	2.42979	0.129977	-2.11548	0.920678	1.55586	0.118661	2.67364	-1.34381	0.113154	2.15484	2.35958e-05
HMBS	no	no	-5.00497	-5.39598	-4.94299	-4.27604	-4.38621	-4.82273	-4.76735	-5.15084	-3.71485	-4.23075	-4.17042	-3.31958	-4.3174	-4.50485	-4.80923	-4.31747	-4.82531	-5.12198	-4.9246	-4.574	-4.22458	-4.73038	-4.72457	-2.93211	-2.71894	-0.818602	-4.77209	-4.89958	-4.92775	-4.67718	-4.9824	-4.5948	-4.68705	-4.77081	0.478935	0.0926615
MME	yes	no	-2.98952	-2.99645	-2.72389	-3.51683	-3.15226	-2.02005	-2.43644	-2.32697	-0.471791	0.0607815	-2.65908	0.29159	-0.177234	-1.23126	-1.6181	-2.40044	-2.11681	-1.8651	0.610357	-2.9367	-0.33137	-0.824358	-0.920316	-1.43494	-3.28434	-0.891576	-2.05658	0.36112	-1.83627	-1.16125	0.354715	-2.76945	1.33726	-2.12099	1.58218	7.15719e-05
MGP	no	no	-3.06068	-3.52262	-2.94722	-3.00669	-3.05473	-2.58629	-3.056	-0.974423	-1.97468	-3.24818	-3.36545	-2.91865	-3.10821	-1.31515	-3.17275	-0.696141	-2.41651	-3.33906	-3.05221	-2.17571	-2.01948	-1.21803	-1.70407	-0.810879	-2.16553	-1.88762	-3.05883	-2.63457	-1.41529	-2.00557	-2.23357	-2.70441	-4.01852	-2.61023	0.863389	0.000142075
LPA	no	no	1.29592	4.48472	0.964691	3.60827	0.901837	3.95726	1.81713	2.73295	2.68915	5.32884	1.54141	1.37625	7.50821	3.93692	4.96889	4.33174	4.2038	1.56403	4.63885	3.4445	5.40179	4.91063	2.04746	5.5438	2.11712	-0.291223	3.09834	2.01845	3.31023	3.19589	4.11123	-0.588805	4.27881	2.45199	0.748592	0.328341
PLEK	no	no	-3.7313	-1.87851	-3.42146	-3.42281	-3.50709	-2.22791	-3.4044	-3.25553	-2.80025	-3.31356	-0.146697	-0.91531	-2.88482	-3.1817	-2.65428	-2.26596	-3.40263	-3.34839	-2.59655	-3.43372	-3.5529	-3.24877	-3.74669	-1.4258	-2.41861	-2.14641	-3.36783	-3.24879	-3.69686	-3.17541	-2.73208	-3.24259	-3.50031	-3.17953	0.342899	0.323233
CD14	yes	no	1.13652	0.000363775	1.1504	-1.57657	1.66404	-0.659432	1.38826	6.43471	8.69258	7.2249	3.58883	6.24734	5.59221	7.85207	4.5415	4.24536	0.507135	5.15087	9.192	4.53951	4.24192	6.31762	3.35052	4.42644	3.96819	7.84661	7.40838	8.8099	6.08223	5.55385	7.98728	6.03485	8.50055	6.61012	5.74112	1.76286e-06
COL4A2	no	no	-1.48479	-0.446752	-2.25796	-1.45783	-0.772257	-2.97276	-0.730132	2.34028	1.5667	1.17083	-1.62789	0.330543	2.14595	1.39122	-1.70832	0.406231	-0.722524	0.282227	1.53415	0.873064	0.691747	0.6703	1.14196	2.66054	-0.0344013	2.47469	1.73446	3.65339	1.39571	-0.375729	0.906302	0.678378	2.21883	1.49912	2.1824	0.00106266
PTPRC	yes	no	-3.20087	-2.46534	-2.59154	-2.6221	-3.5174	-3.44201	-2.10229	-1.79195	-2.5249	-1.67456	-0.805404	2.64881	-1.34735	-2.39489	-0.640545	-0.48038	-2.31007	-1.40826	-0.625084	-2.81132	-3.37413	-3.60274	-2.97351	1.35291	-1.14859	-0.518403	-2.59595	-2.29392	-0.883004	-2.54096	-1.70284	0.87903	-2.10279	-2.17899	1.79219	1.75065e-05
MET	no	no	-4.34501	-4.2603	-3.61453	-3.96796	-4.20477	-4.01273	-3.95217	-3.0819	-2.71732	-2.16083	-3.76856	-4.0521	-4.42719	-5.17077	-3.29864	-1.92005	-4.15436	-3.8608	-3.63611	-3.80591	-4.2808	-1.84904	-3.25247	-3.92391	-3.5171	-3.04505	-3.37029	-3.11183	-2.1878	-1.83098	-3.67359	-4.28619	-2.6991	-2.51408	0.827908	0.00106435
MELTF	no	no	-0.73842	-1.23341	-0.606677	-1.50732	-1.12642	-1.32617	-0.823326	3.53502	3.07183	1.49898	-0.83287	-0.287366	1.55263	2.91618	-1.93524	0.392347	-0.441069	0.515971	1.54937	-0.95445	0.468871	2.03395	2.38253	-0.184417	-0.298263	0.512263	2.66733	1.83842	1.84984	0.44785	1.95953	-0.980583	2.20247	1.55253	2.0453	4.71757e-06
CFH	no	no	2.00523	3.05121	2.053	2.74299	3.544	0.980841	1.45006	5.68407	4.23171	5.94024	8.36764	6.4311	5.47113	4.33277	8.13679	8.5968	1.80766	4.21062	2.12926	6.10395	1.10682	8.39561	5.96865	3.69703	8.12735	6.48549	5.82418	1.51748	7.55756	7.64062	5.33988	7.00484	1.20824	5.08216	3.78339	6.44999e-06
SNRNP70	no	no	-3.32151	-3.09938	-3.015	-2.93848	-3.30607	-2.28331	-3.18248	-1.63273	-2.49972	-2.05052	-1.3268	-1.71296	-3.11017	-3.21603	-2.96529	-3.28049	-3.07373	-3.13414	-1.79365	-1.98752	-2.9827	-3.21532	-3.30053	0.972574	-2.34573	-2.50925	-2.70965	-2.72969	-3.23229	-3.14947	-3.0368	-2.05933	-2.08825	-1.93757	0.692532	0.00589971
FCGR3A	no	no	2.00927	2.87975	2.77263	3.78739	2.01027	4.08415	2.47432	5.14324	4.72695	5.81823	3.65526	4.1047	5.54423	6.68935	1.4994	2.21077	5.1563	1.49395	4.84405	2.51252	3.42481	3.44053	2.77486	1.88612	2.04591	2.55214	4.46586	4.89563	2.75663	3.75178	3.68339	2.41173	7.211	4.63236	1.14374	0.0252165
VIM	no	no	-0.291519	0.524575	0.567504	-0.216872	-0.248615	0.0856066	-0.444637	4.26482	3.66657	1.33468	2.70292	2.61526	1.62857	0.29188	4.30093	3.77027	-1.36265	2.92687	0.773641	2.16115	0.182689	1.72671	-1.49175	2.35408	2.52084	2.67003	1.04746	1.45699	2.40262	2.57724	2.79988	5.66389	1.40706	2.44053	1.92791	1.92995e-05
SERPINF2	no	no	1.96698	1.86905	1.89879	2.00576	2.086	2.21331	2.11488	4.66792	4.22469	5.07787	4.54119	5.08702	2.77116	3.8332	4.56904	6.55765	0.428103	1.64403	4.2892	2.1006	0.600005	5.15665	4.8987	2.57885	5.55687	4.73798	3.78718	3.86515	5.56882	5.7462	4.63053	4.57256	4.95677	4.42192	1.5257	0.000107372
RPS17	no	no	-1.78526	-5.63598	-4.90425	-5.48079	-4.80794	-5.09554	-4.87371	-4.75121	-5.02435	-3.58764	-4.15805	-5.34166	-4.33209	-4.98807	-5.04722	-5.01528	-5.41561	-5.23325	-4.70294	-5.10747	-5.215	-4.69798	-5.7143	-5.37629	-5.54472	-5.03207	-5.93081	-5.85261	-5.33317	-5.57624	-2.84196	-5.13311	-5.50864	-5.11202	-0.422675	0.471529
F7	no	no	-4.47455	-4.35746	-4.43046	-4.43981	-4.17215	-4.32901	-4.09574	-3.16747	-5.32578	-2.06023	-2.15908	-2.70257	-4.49377	-3.34492	0.0319388	-1.78632	-4.43379	-4.54715	-4.27067	-3.93386	-3.94968	-3.13694	-3.4897	-1.34067	-1.86685	-3.60677	-4.09478	-2.86754	-2.18259	-2.17865	-3.98576	-3.34975	-3.91469	-2.93557	0.788004	0.0111167
KRT19	no	no	1.51979	0.0477066	-1.13935	-0.487799	-0.452722	-0.0154688	-0.940401	6.0953	4.90686	1.48085	0.546027	0.192241	0.869445	0.630509	3.62464	2.53488	0.0611263	0.184711	-0.573288	0.354636	1.29164	2.72928	-1.11644	1.89603	3.67711	2.70478	2.61375	0.901645	2.80309	1.71655	0.763034	2.93723	-1.56589	1.04992	1.97607	0.00290374
KRT7	no	no	-1.30196	-1.90583	-2.16676	-2.21333	-2.11835	-0.74169	-1.23474	5.48767	4.60996	0.469661	0.0868413	0.0203967	-0.42167	-1.59765	1.71348	2.05983	-1.90748	-1.54413	-1.91485	-0.373629	-2.04241	2.9429	-1.18182	1.46889	3.77069	2.45084	0.967224	-1.20143	1.74716	0.51822	0.139866	1.85363	-1.3507	0.717704	2.35356	2.56e-05
GNAI3	no	no	-1.6767	-1.99261	-1.91029	-1.98554	-1.97836	0.321968	-1.62936	0.106778	-0.520321	-0.668114	-0.547475	0.280229	-0.157637	-0.889928	-1.22542	-1.64384	-0.440015	-3.0755	-0.955061	-1.92769	1.08742	-1.03301	-1.52903	-1.18504	-1.16562	-0.823829	-1.5048	0.242149	-0.895872	-1.29459	-0.976228	-0.349665	0.547985	-2.10326	0.671196	0.154237
ANXA5	no	no	-3.35508	-1.07264	-1.59204	-1.25004	-1.42027	-1.39402	-1.56637	1.90044	-0.496225	-0.716979	3.79151	1.11148	1.29379	-0.797542	0.937179	-0.963042	1.32613	3.51427	0.0294779	1.01674	1.64555	-0.839395	-0.0504767	0.731134	-0.551852	2.70994	-1.8066	2.61866	0.372022	2.10363	-0.0533858	-0.180014	1.0405	0.388675	2.16095	0.000385911
KRT16	no	no	0.263167	-2.59517	-2.23706	0.157603	-2.42855	-2.23148	-2.23104	1.42833	-2.64409	-1.36704	-1.94613	-2.50821	1.18347	-0.880201	-2.64583	-2.30507	-0.283106	-1.58473	-0.940295	-1.86401	0.734826	-2.10897	-2.14878	-2.08569	-1.66042	-2.76503	-1.18702	-0.175043	-1.65599	-0.779493	-2.68371	-2.21722	-2.74088	-1.75867	0.0717938	0.917345
IGFBP1	no	no	-2.98438	-3.32894	-3.67044	-3.80153	-4.21842	-3.56303	-3.92054	-4.08552	-1.67344	-3.27762	-4.3109	-0.444416	-1.77407	-4.03066	-1.20788	-4.59097	-1.54734	-3.39242	-1.85385	-0.729988	-3.36128	-2.73753	-4.04064	1.58736	-1.33493	1.04681	-3.34352	-2.03214	-1.88252	-4.11869	-4.39168	-3.60067	-2.24225	-2.00009	1.30797	0.000564854
RPSA	no	no	-2.86396	-3.03912	-3.04324	-2.83062	-3.24521	-3.21978	-2.73384	-0.00622247	-0.566858	-2.5263	-1.35989	-2.01565	-2.31941	-2.09212	-1.48097	-2.0118	-3.59936	-3.09626	-0.770996	-3.59093	-3.15584	-3.55619	-3.025	-0.536953	-1.67242	-0.880799	-2.67116	-1.91779	-2.47769	-1.65988	-2.91355	-0.355702	-2.14385	-2.46163	1.22317	0.000120939
IL6R	no	no	-2.63953	-2.62533	-2.97822	-2.4215	-2.80029	-2.65376	-3.29091	-1.20291	-1.32287	-0.686212	-2.29103	-1.22004	-0.810981	-0.366175	-2.50985	-1.16565	-2.96675	-3.19666	-0.758273	-2.90703	-4.46532	-0.861284	-1.72288	-2.53125	-2.02965	-1.9714	-1.05891	-1.46946	-0.960946	-1.30359	-0.984791	-2.2852	-0.325109	-1.36705	0.994669	0.000200819
CD63	yes	no	-2.42234	-2.93528	-3.21773	-1.89362	-2.66288	-1.16977	-1.81217	-0.224385	-0.562737	-1.28825	-2.81754	1.02232	-0.160883	-1.82205	-1.44676	-1.86067	0.957384	-1.61263	0.484864	-1.51643	-0.254444	-1.08573	-1.04912	-0.35836	-0.53081	-1.76974	-1.33433	0.0333431	-3.23005	-2.39239	-2.24246	-1.2243	-0.463695	-1.86798	1.21994	0.004498
SNRPA	no	no	-0.554855	-1.08041	-1.06054	-0.289901	-0.916755	-1.25103	-1.27285	0.947	-0.215151	0.722577	1.7527	1.25664	0.102325	-0.724167	1.47774	1.15436	-1.14404	-1.09718	-0.969172	-1.3219	-1.08688	-1.00184	-0.590292	0.800435	0.492072	0.334486	1.13861	-0.236468	2.59825	2.12571	-0.551915	0.0202429	1.21991	2.08055	1.24759	0.000118775
HBQ1	no	no	#NUM!	#NUM!	#NUM!	#NUM!	#NUM!	#NUM!	#NUM!	#NUM!	#NUM!	#NUM!	#NUM!	#NUM!	#NUM!	#NUM!	#NUM!	#NUM!	#NUM!	#NUM!	#NUM!	#NUM!	#NUM!	#NUM!	#NUM!	#NUM!	#NUM!	-1.45598	#NUM!	#NUM!	#NUM!	#NUM!	#NUM!	#NUM!	#NUM!	#NUM!	#N/A	#N/A
ACAA1	yes	no	-4.41161	-4.89268	-5.02397	-1.80971	-4.53597	-5.08986	-4.96478	-5.45315	-4.15298	-5.11278	-3.71286	-1.23144	-4.77016	-5.33445	-4.69164	-5.4463	-5.15011	-4.50401	-4.35271	-5.26985	-5.35632	-2.59199	-5.46318	-4.47936	-4.47191	-1.94171	-5.50034	-4.6334	-5.07444	-4.37211	-5.24771	-4.26628	-4.87504	-4.1979	0.14189	0.82404
SLC10A3	no	no	-3.26117	-2.78996	-3.1704	-3.06412	-3.12565	-1.86111	-2.75984	-1.47619	-2.13422	-1.85776	-3.52567	-3.04583	-1.27799	-0.343157	-2.93553	-2.97765	-1.31375	-3.53778	-0.794463	-2.36422	-2.02011	-3.29733	-1.81877	-3.40109	-3.5378	-2.38185	-2.35862	-0.37065	-2.5767	-3.35604	-3.14066	-3.29128	-1.84709	-2.17711	0.603203	0.0626748
DBH	no	no	-3.36071	-3.11889	-2.5551	-2.59067	-2.15526	-2.68918	-2.6203	-1.22417	-2.8516	0.778746	-3.14308	-0.121628	-2.31998	-2.45808	-3.24076	0.249318	-2.96089	-3.14953	-2.25396	-3.59691	-2.66774	0.250382	-0.139396	-3.1714	-0.418396	0.0856829	-2.40708	-2.9855	-0.0686465	-1.57832	-2.62046	-1.87092	0.268763	0.491576	1.78327	6.6522e-05
GSTP1	yes	no	0.871118	1.95229	1.274	1.43774	1.55001	-1.79031	0.961987	5.18995	5.54885	3.74278	4.62668	5.02247	2.12399	2.78672	4.54706	4.25788	0.245656	3.74994	5.02777	1.8182	1.04655	2.39248	3.27746	3.45281	3.62133	4.29855	2.25759	3.66624	3.02277	3.0709	2.753	5.60001	4.945	4.2935	2.54731	0.00203584
CST2	no	no	-3.78571	-3.89799	-3.4242	-3.61679	-3.79682	-3.01349	-4.19068	-0.863912	-1.16296	-3.24369	-3.53596	-4.04827	-3.55377	-1.68762	-4.01016	-2.66089	-3.46793	-1.12189	-1.32332	-4.56482	-4.35108	-2.19673	-3.02635	-1.04052	-3.46689	-3.73201	-4.38148	-3.62785	-3.95099	-3.69973	-0.340618	-3.59798	-3.07466	-3.81786	0.457271	0.146941
MMP7	no	no	-0.353555	-0.233453	-0.646199	-0.214734	-0.483009	-0.218418	-0.547827	1.60823	0.75666	2.46843	1.189	1.79418	0.612867	2.82275	-0.173543	1.04486	-0.0562799	0.318605	1.3482	-0.758339	-1.96243	1.01464	0.614211	0.0235101	1.21104	3.03929	1.24478	0.6762	1.58491	1.44554	3.21417	0.139653	1.48815	2.18817	1.54155	9.82437e-06
MMP10	no	no	-3.79907	-3.85486	-3.11531	-3.58539	-3.8587	-2.89321	-4.62798	-3.98707	-3.99782	1.57166	-2.44678	0.781509	-3.39232	-3.9125	-0.565313	-1.754	-4.30367	-2.32371	-0.990537	-4.67696	-4.02989	-3.00178	-3.95679	-3.78223	-4.37696	-0.340709	-4.24872	-4.24204	-4.0298	-3.19073	-3.26313	-1.01267	-3.06765	-2.26454	0.651705	0.0873315
CD48	no	no	-2.30606	-2.35449	-2.24901	-2.50652	-2.9974	-1.66383	-2.3671	-2.12499	-1.6093	-2.16658	-2.78752	-1.16573	-2.54995	-1.53066	-2.27343	-1.05994	0.135146	-2.08981	-0.681396	-0.482651	-2.25874	-1.87688	-2.13614	-2.41448	-2.83743	-1.65936	-2.01903	-0.296453	-0.553821	-2.8056	-1.35602	-1.89737	-0.923152	-0.177936	0.71593	0.00421917
VIL1	no	no	-4.42609	-4.64586	-4.38299	-4.71137	-3.9547	-3.83728	-4.35355	-4.03148	-2.99145	-4.09097	-4.37887	-4.63355	-4.47929	-3.82462	-1.30402	-4.45479	-3.77351	-4.8067	-4.2007	-3.9588	-4.55126	-3.8522	-3.98262	-3.74382	-4.11555	-3.61975	-4.45275	-3.02099	-4.12953	-3.64966	-4.36132	-3.7303	-4.50415	-4.3257	0.169786	0.301232
CXCL1	yes	no	-3.5315	-3.65547	-3.10988	-3.21839	-3.47393	-3.79224	-3.92314	-2.49013	-2.69697	-1.41398	0.510482	-0.239445	-1.0133	-1.8704	-3.39571	-0.44928	-3.5241	-3.14429	-3.07299	-3.17193	-2.68667	-2.76229	-2.60849	-0.118162	-0.581591	-1.98962	-2.8416	-3.87519	-3.18073	-0.867103	-2.6432	-2.01886	-0.542378	-1.59716	1.52402	7.22099e-05
LGALS1	no	no	-2.95109	-3.48181	-3.07218	-3.39156	-3.42757	-2.85424	-3.4108	-1.66035	-1.96823	-2.17912	-1.17059	-1.81128	-2.76171	-4.22244	-1.24762	-1.89751	-3.19434	-2.38158	0.843757	-2.65251	-3.07541	-2.9485	-3.34786	-1.20812	-1.77139	-2.04141	-3.85303	-2.64015	-1.73086	-1.66769	-2.08096	-1.19147	-2.89086	-2.54131	1.25421	5.41207e-05
QDPR	no	no	-2.62701	-2.76261	-3.08077	-2.85548	-2.95991	-3.22363	-2.48258	-2.04214	-0.312991	-1.97122	-0.916186	-2.05783	-1.7676	-1.37865	-2.37661	-2.42872	-2.63051	-3.53348	-0.838702	-2.62796	-1.86354	-2.46847	-1.0599	-1.78965	-1.77957	-1.06367	-3.39172	-0.0967285	-3.09378	-3.97266	-1.8613	-0.187337	-1.5831	-2.68435	1.03713	0.000158246
HMGB1	yes	no	-1.76662	-1.29365	-2.37341	-1.33153	-1.43946	-1.92422	-1.68455	-0.618836	-0.0394486	0.286107	3.36744	1.33631	-1.3643	-1.51021	1.05961	-0.614136	-1.92085	0.151879	-1.0034	-0.48961	-1.77286	-2.57248	-1.189	2.02855	0.502743	0.890854	-1.58343	-1.84327	-1.96667	-0.603948	-1.83034	-0.223261	0.57546	2.21238	1.27027	0.000511299
RBP1	no	no	-2.61849	-1.75572	-1.94711	-2.05146	-1.73556	-1.52626	-1.89646	-2.79336	-0.780771	-0.779714	-1.73067	-1.1591	-1.49972	-0.391465	-1.10299	-1.61104	-1.60976	-1.97219	1.44533	-0.588352	-2.04057	-1.98905	-1.88375	-0.712685	-1.89603	-0.96082	-1.73067	-0.404841	0.571556	-0.0113815	0.321594	-0.41478	-1.69687	-1.98276	0.574424	0.0131619
PAEP	no	no	-5.57864	-6.99912	-7.93343	-8.42657	-4.27099	-8.97131	-8.07764	-9.61472	-5.51676	-6.30992	-8.12413	-7.32406	-9.90674	-7.05793	-9.77621	-7.04952	-6.10979	-9.93182	0.280802	-9.02681	-5.70642	-6.34349	-6.53575	-6.05963	-7.58547	-6.42384	-8.54129	-6.75254	-8.03886	-8.2774	-8.43352	-9.69933	-5.39347	-8.77713	1.13611	0.0391773
FBP1	no	no	-0.690401	-1.75356	-0.965535	-0.837656	-1.0278	-2.23218	-0.986407	2.2816	3.64337	2.75054	-0.140921	3.03124	0.00562264	-0.259952	0.407278	-0.0252004	-2.55327	-0.800222	1.80137	-0.0622068	-0.977116	0.198086	0.489386	0.219088	1.09195	1.82015	-0.747257	1.29044	0.224329	1.32916	0.496964	0.689615	1.69151	1.06686	2.22163	6.78715e-06
SPARC	no	no	-2.93945	-2.8885	-2.7623	-2.97575	-3.08542	-0.443709	-2.91813	-1.05808	-1.92215	-2.32134	-3.22001	-3.65599	-1.57707	-1.4618	-1.88392	-2.06735	-1.49299	-3.11581	-1.50061	-2.4944	-3.06749	-2.14281	-2.32827	-0.221635	-3.01272	-0.952726	-2.32031	-1.25092	-1.40283	-2.49658	-1.64327	-1.6159	-1.58729	-1.73112	0.463232	0.319052
GSTM1	no	no	-3.88257	-4.87489	-4.28343	-4.16494	-3.90581	-4.06679	-3.7372	2.05688	2.63691	-3.49951	-0.333948	-3.81364	-2.93526	-3.54452	-0.745075	-4.35418	-3.21751	-2.11367	-1.26911	-3.22611	-3.5748	-1.21469	-4.10342	-4.06929	-3.92854	-3.1054	-4.55179	-2.56437	-1.03635	-5.10616	-4.19931	-0.130047	-4.45494	-2.32686	1.31569	0.0117312
TPM1	no	no	-2.89913	-3.22729	-4.39501	-3.8242	-3.78477	-0.90708	-2.84978	-0.683525	-2.25912	-2.05798	-1.08091	-2.98194	-4.22179	-3.85339	-3.80153	-3.80763	-4.16504	1.02873	-3.80504	2.23267	-1.85823	-4.42082	-3.78468	-1.09955	-3.87335	-3.6889	-2.67108	1.04294	-3.05037	-3.72896	-3.68725	-3.52827	-4.06262	-2.85567	0.726609	0.256135
CLTA	no	no	-5.07746	-5.20462	-4.46455	-5.28518	-4.95212	-4.96697	-5.96305	-4.04584	-3.94921	-4.91584	-4.51198	-5.50446	-4.3323	-5.02522	-4.67768	-5.5193	-5.17603	-1.01159	-4.17431	-5.1611	-6.01583	-4.97856	-5.31122	-2.47154	-5.85942	-3.79974	-5.55225	-1.78318	-4.60224	-5.00625	-5.24742	-4.32007	-4.2529	-4.55739	0.784962	0.0157987
CLTB	no	no	-2.50963	-2.55597	-3.10259	2.03248	-1.4036	2.20617	-1.4854	0.146359	-0.739841	-1.19348	-1.46852	-2.31347	-1.79142	-0.934708	-0.839722	-2.30238	-2.66639	-1.75426	-1.4134	-1.37108	-2.63901	-1.36194	-2.21665	0.667395	-2.02154	-1.30058	-1.80706	-1.11565	-2.48544	-1.91072	-2.45843	-0.447494	-1.74656	-0.621775	-0.499512	0.633902
ANXA4	no	no	-1.3847	-1.20054	-2.44206	-2.24493	-1.59966	-1.66571	-1.47788	-0.264148	0.025932	-0.520728	-1.24931	1.36347	0.328893	-1.1196	0.5372	-1.09058	-1.30499	-0.384702	-1.02353	-0.859792	0.161547	-0.28013	-1.60263	2.83295	-2.02708	1.9274	-1.99863	1.15354	-1.68713	-1.01709	-0.273864	-0.383911	1.25179	-0.79731	1.47808	2.84881e-05
INHBB	no	no	-2.4194	-1.77477	-2.51735	-2.25528	-1.94796	-2.44773	-2.42641	-2.30509	-1.7858	-1.30687	-1.80863	-2.27924	0.169648	0.259415	-1.41992	-3.11746	-1.99243	-2.00581	-1.02593	1.99748	-1.05407	-0.629232	-1.53245	1.37214	-2.1886	-0.633881	-2.18403	0.262121	-1.56141	-2.32145	-0.472044	-1.09705	1.00415	-0.921861	1.03617	0.000988296
CNP	no	no	-3.58241	-3.27656	-3.59041	-2.58053	-3.43048	-2.8406	-3.37483	-2.76914	-2.61521	-3.17237	-3.51986	-2.56534	-2.28036	-2.5743	-3.55757	-2.0137	-2.11232	-3.76115	-3.42392	-3.28555	-1.43268	-3.19859	-2.83775	-1.99695	-3.14062	-2.95269	-3.25634	-1.75499	-3.42326	-3.58951	-2.68198	-1.75882	-2.97438	-2.56588	0.44567	0.0467481
CD7	no	no	-3.5017	-3.42138	-3.56742	-0.499856	-3.95932	0.240796	-3.41251	2.4033	2.34112	1.52419	-1.74198	-1.99004	3.26723	2.10282	-3.91752	0.0113087	1.62164	0.993361	2.34247	0.0979359	1.52262	1.598	1.43116	-3.16264	-0.296445	0.727994	0.431991	2.9675	1.14452	-0.389874	1.17636	-1.25453	3.224	2.18335	3.25314	0.0024665
HMOX1	no	no	-1.81777	-1.61062	-2.00851	0.15209	-1.45293	-1.08078	-1.2304	-1.85584	-1.69628	-1.71689	-1.84336	-1.4359	-1.43403	-1.66886	-1.77862	-1.74421	-1.4876	-1.5522	-1.19095	-1.61412	-1.33141	-1.27644	-1.5541	-1.6736	-1.56834	-1.5678	-1.67492	-1.92528	-1.15986	-1.73545	-1.48076	-1.96371	-1.70738	-1.60746	-0.191072	0.58843
CSF1	no	no	0.98143	2.75884	1.2319	3.24012	1.56117	3.59573	2.89713	5.70708	5.80243	4.6856	1.63162	2.45221	6.21296	5.41378	1.29741	1.61027	4.84234	4.12372	6.75166	3.68024	5.58574	4.78087	4.30476	3.98363	2.36435	5.47825	4.92774	6.51941	4.63831	2.72268	5.30173	3.74147	6.22766	5.49783	2.13127	0.00180505
PDGFRB	no	no	-1.19873	-1.20307	-1.35074	-0.471886	-1.66226	0.0304927	-0.90128	0.608858	0.587174	0.284218	-1.0964	-2.16299	1.54408	1.26841	-2.33338	-1.40728	1.15067	-0.28459	1.33412	-0.483398	0.583543	-0.0213189	0.166159	-0.536088	-1.42563	0.0203512	0.781303	0.806225	-0.518904	-1.02555	0.279077	-1.1345	1.30759	0.0514989	0.966321	0.0145387
DLD	no	no	-1.18099	-2.85469	-3.1877	-3.38678	-2.76113	-1.76089	-2.81307	-3.06112	-1.69512	-1.79974	-3.23817	-0.527811	-3.08392	-3.22051	-2.90249	-3.11515	-2.905	-3.02807	-2.84568	-2.5363	-3.52972	-3.21601	-3.02898	-2.97657	-2.84997	-2.56232	-3.00962	-3.56772	-3.26412	-1.40662	-2.97675	-3.19471	-3.33258	-2.83431	-0.0832795	0.8547
HNRNPA1	no	no	-1.51847	-1.9659	-1.44439	-1.65144	-1.80601	-0.887573	-1.37976	0.878471	0.11792	-0.450069	-1.03691	-0.669419	-1.61985	-1.48138	1.18169	0.0709255	-1.18005	-1.42662	-0.768538	-1.79095	-1.79867	-1.30773	-1.24088	1.40032	-0.242368	0.480058	-0.362099	-0.595839	-0.0611556	0.421905	-0.683114	1.21678	-0.903897	-0.969938	0.922917	0.000282482
SNRPA1	no	no	-3.8368	-3.88441	-4.23763	-3.72871	-3.78653	-3.90945	-3.89964	-3.23407	-3.70879	-3.46779	-2.15989	-2.77317	-4.14885	-3.48764	-2.17448	-2.26887	-3.8006	-3.95731	-4.22055	-3.9095	-3.81632	-3.61903	-4.19184	-2.43199	-4.09708	-2.63972	-4.12467	-3.83587	-3.95344	-3.84863	-3.81348	-2.46278	-4.01251	-3.49126	0.312553	0.0656877
CTSH	yes	no	-0.00715118	-1.21722	-0.320684	0.357299	-0.392116	2.47482	-0.554727	1.77162	3.40567	2.38105	-0.768249	3.39946	1.69739	3.82549	0.309415	0.474068	2.7346	-0.543374	3.70568	0.803796	1.46925	2.1378	1.92993	3.43554	1.45951	3.20549	1.56993	4.18352	1.6361	0.479548	2.79909	0.436776	2.57845	-0.454981	1.81106	0.0121677
GIP	no	no	-2.73973	-3.63043	-3.04476	-3.54998	-3.39457	-3.42409	-3.24642	-3.03183	-2.7871	-4.04916	-2.74767	-2.47598	-2.79392	-2.44621	-3.41204	-3.10721	-3.01892	-2.77647	0.603745	1.29445	-3.13306	-2.64931	-3.04908	1.43676	-2.44054	-1.64718	-2.84103	0.471935	-2.62999	-3.65894	-0.648556	-0.117122	-3.52045	-3.15763	0.715759	0.102015
TACSTD2	no	no	-0.256219	2.02485	-0.464545	2.2816	-0.577383	2.69539	0.0318713	0.537915	0.284373	0.200539	-1.79075	-1.57378	0.970509	0.514182	-2.10644	-0.271507	0.622496	-1.21682	0.280811	-1.1743	0.762536	-0.416892	0.439875	0.20367	-1.3854	-0.581619	-1.0118	1.11284	-1.28826	-1.27553	-1.07321	-1.94514	-0.590469	-0.245824	-1.26448	0.0897357
FGR	yes	no	-3.05936	-3.27011	-3.25385	-3.16872	-3.30363	-3.46593	-3.31742	-3.55632	-3.86754	-3.46404	-3.29101	-1.49658	-3.27366	-3.16844	-2.08755	-1.16772	-3.29007	-2.45153	-3.52476	-3.41046	-3.6738	-3.38784	-3.5295	-3.13457	-1.85141	-3.30191	-3.57601	-3.4848	-3.37712	-2.56722	-3.48581	-0.942741	-3.46802	-3.57613	0.409461	0.0340592
C1S	no	no	0.138464	-0.387869	0.486442	0.938008	0.40741	0.67634	0.265448	3.00144	1.37264	4.23018	3.97129	1.63936	1.13962	1.85266	4.64064	5.06455	0.513426	-0.755871	0.652525	0.355213	0.899647	3.56847	3.51219	2.40738	4.24346	2.88893	1.84572	1.37978	3.77432	3.77124	1.40727	2.96355	1.31794	1.834	1.78139	2.01652e-05
ALPI	no	no	-2.4596	-2.48695	-2.28672	-1.56039	-2.25563	-1.01713	-2.721	-2.55628	-1.8483	-0.979311	-2.90923	-0.394709	-2.42465	0.900133	-0.511634	-2.83568	-2.68447	-2.4477	0.358506	-3.56393	-0.0529254	-1.42614	-2.11014	-2.88274	-1.40404	-1.89553	-1.82585	-0.031799	-2.80323	-1.43334	-1.97965	-1.67443	-2.34724	-2.71062	0.757337	0.117121
UCHL1	no	no	-3.30474	-3.52591	-3.66011	-3.23525	-3.51793	-3.73767	-3.77595	-0.621369	-2.52578	-2.74033	-3.35806	-2.09914	-1.73805	-1.50478	-3.56295	-2.97186	-3.24958	-3.72723	-2.01521	-2.51241	-2.28725	-2.44526	-2.40204	-2.0423	-3.34053	-1.99889	-2.25453	-1.80409	-2.46935	-1.79731	-2.02397	-3.83415	-0.16379	-1.58458	1.03583	0.000155211
FURIN	no	no	-1.58052	-2.04524	-1.73645	-1.52678	-1.51691	-1.14462	-1.85639	0.329425	-0.0661983	-0.561641	-1.23247	-1.25364	-1.50965	-0.114333	-1.84544	-1.39683	-1.26127	-1.61701	-0.56519	2.64338	-0.869514	-0.678711	-1.01018	1.55976	0.259603	0.683927	-0.632567	1.6735	-1.02889	-0.818571	-0.00930539	1.25797	0.567659	-0.250197	1.45864	1.72867e-05
LTA4H	yes	no	0.44351	-1.90637	-0.973769	-0.630865	-0.921705	-0.895986	-0.847263	1.94646	2.92402	1.11763	4.30744	4.09596	-0.552661	-2.30956	3.48177	3.14098	-1.04461	2.84045	3.15181	-0.368969	-2.3217	-1.03573	-0.500276	1.6723	2.5113	2.36207	-0.715457	-1.1979	0.812926	1.84484	1.64696	5.01419	1.53694	0.684425	2.62694	7.82395e-05
ALDOC	yes	no	-3.10164	-3.17464	-3.23032	-3.10226	-3.11247	-2.96475	-3.58833	-2.28961	-0.530186	-1.13898	1.242	0.443597	-3.3779	-1.37897	-0.90659	-1.80792	-3.59916	-1.35456	-1.37475	-3.14583	-3.35846	-3.75845	-2.89755	0.865148	-1.9164	-1.25509	-3.71303	-3.02079	-3.2356	-2.3447	-1.25544	-0.0674393	-2.68893	-2.36191	1.51131	0.000215641
C4A	no	no	3.36608	2.9988	3.06149	2.27326	2.09449	3.20386	3.20818	5.45008	5.56905	7.27603	7.4816	7.74844	3.67055	5.18539	8.37054	8.65172	0.947864	3.25838	5.0486	4.90664	1.94972	7.69652	6.25701	3.75609	8.2266	6.97377	5.29287	3.44313	8.36749	7.80953	5.09735	6.69024	4.16789	5.13328	2.43949	2.60077e-05
C4B	no	no	1.33453	1.28437	0.881845	1.85774	1.84807	2.36525	1.3345	3.73734	5.07089	5.24224	4.55814	6.17446	1.9938	3.87583	6.14111	6.62674	-0.794558	2.40357	5.54758	2.41963	1.09335	5.68235	3.49048	2.53131	6.37799	4.97314	4.90169	4.43674	5.91532	5.61984	5.17602	4.65711	4.18962	3.51782	2.36726	7.88719e-06
H2AZ1;H2AZ2	no	no	-4.50683	-3.89903	-4.34277	-4.2499	-4.2496	-4.06214	-5.37482	-2.66498	-2.27458	-4.00969	-3.85378	-0.190065	-3.52827	-4.48124	-2.39282	-1.80423	-4.27884	-4.3111	-4.85171	-1.29284	-5.237	-3.99074	-2.7935	2.41899	-2.85577	-1.4722	-4.94106	-2.51749	-3.73587	-3.88782	-3.17963	0.855038	-3.32984	-2.99542	1.00623	0.0236371
ELFN1	no	no	-3.37841	-3.21264	-3.61541	-3.48995	-2.9431	-2.90983	-3.14948	-0.882436	-1.70631	-2.3209	-2.75536	-3.64167	-1.15097	-0.809293	-2.60933	-2.23844	-3.95204	-2.90282	-1.75167	-3.54038	-3.49946	-2.24639	-1.57105	-3.22321	-2.93623	-2.28984	-1.8051	-1.53702	-1.80427	-3.06067	-2.37633	-3.11903	-1.04157	-3.11722	0.844835	0.000661634
PGA3	no	no	2.61621	-0.586011	-2.85384	2.94613	1.11878	-1.10897	1.09181	7.03195	7.18919	6.08981	4.41451	5.36571	6.86701	7.39821	3.81726	3.54454	0.419011	2.6531	5.31515	6.33631	6.11198	7.61553	5.80464	4.07181	4.55047	6.09176	6.70348	5.68051	4.92537	2.52976	6.38079	5.01256	7.7774	5.86526	4.90566	0.00106116
SAA1	no	no	-0.502592	-1.16507	-0.708979	0.26385	-0.480702	0.304728	-0.895763	3.19638	2.74057	6.25499	4.03491	0.960421	-1.52405	4.01268	6.59427	4.15019	-2.04848	-0.517331	1.95622	1.83189	-2.4311	4.52692	-0.483846	5.81344	2.88121	5.34406	0.558087	2.09042	3.13873	3.7349	0.879856	5.36986	2.18341	2.89815	3.11215	0.000203097
SAA2	no	no	-0.525707	-0.425308	-2.55291	-0.454172	-0.0718569	-0.285121	-0.837517	4.54754	2.58905	5.68629	1.5487	0.567661	0.602238	4.60077	4.06053	4.17383	-1.80226	-0.588358	1.16966	3.46578	-0.476325	4.87213	-1.57738	5.75441	3.6956	4.59454	3.0813	4.33494	3.4782	3.70885	2.28129	5.21983	1.97259	0.569821	3.75397	5.70145e-06
MT1HL1;MT1H	no	no	-4.64901	-3.84731	-4.4613	-4.5967	-4.49081	-2.9091	-4.40973	-4.31269	-4.26781	-3.0169	-4.88496	-4.49182	-3.97672	-4.16401	-4.86037	-4.65736	-2.18815	-4.13008	-3.69638	-4.55826	-2.31841	-4.32078	-4.41226	-3.97994	-4.18863	-4.52054	-3.665	-2.77658	-4.2129	-5.24403	-4.79735	-4.71004	-2.36983	-4.77733	0.0381569	0.912945
INAFM2	no	no	1.40361	2.07488	1.37787	2.13603	0.376368	1.80618	1.63418	3.92171	2.87519	3.64918	0.203875	1.62975	4.28189	3.85345	-0.661609	0.717076	4.90538	-0.247612	3.25322	3.74013	3.65005	3.34452	3.29957	4.35299	0.372849	2.12958	3.67061	4.06652	1.87286	-0.270426	2.43098	2.20274	4.75966	3.29362	1.07329	0.0118069
HSPA1A;HSPA1B	no	no	0.752748	0.378884	0.61626	0.494252	0.737482	-0.164134	-0.326592	3.45995	3.82029	2.86536	4.57349	3.65574	0.82371	0.759132	2.47627	3.45304	-0.464957	2.64203	3.24195	1.47163	0.525626	0.815966	1.00248	2.82051	1.79055	3.09412	0.356337	2.12555	0.812007	1.70429	1.125	5.24759	2.58932	1.86005	1.96568	6.98298e-06
IGLC2	no	no	0.17103	1.98743	0.47327	2.8892	1.88251	4.24551	1.52813	8.63486	9.52352	9.53997	9.2133	9.47783	8.33218	9.02184	9.4517	9.92142	6.81816	8.85947	9.33539	9.12434	6.44749	8.99245	9.27047	8.45492	9.85899	9.67482	8.70202	9.2725	9.79511	10.1358	9.85184	9.54291	9.8161	9.70411	7.25732	2.53027e-05
IGLC3	no	no	-4.53113	-4.42118	-4.17939	-4.44563	-4.32476	-4.75267	-3.91544	-4.59961	-5.29655	-1.49312	-3.14535	-1.92127	-4.04623	0.244446	-2.74838	-1.96873	-4.29216	-3.72064	-3.56776	-4.80299	-4.64434	-4.29743	-2.96084	-4.07809	-2.644	-0.0205308	-3.1389	-4.92949	-0.0581506	-2.75668	-1.27146	-2.40838	-3.86207	-1.90473	1.45148	0.0016159
IGHV1-8	no	no	-0.194658	0.159355	0.231191	-0.564075	0.0606295	-0.680884	0.482367	-0.41209	1.30036	2.31767	2.64992	3.34185	0.107147	1.81501	2.2955	3.51712	-1.70996	-0.186951	0.70422	-0.239192	-0.485871	0.889631	2.06498	0.301426	2.08161	2.61814	0.652854	0.322177	2.63199	2.76441	1.34699	2.30083	3.32167	2.07366	1.76935	8.10097e-05
CALM1;CALM2;CALM3	no	no	1.99799	1.89862	2.53869	3.97527	2.59847	6.21517	2.6025	5.10601	4.30564	2.8336	4.99297	3.69277	3.32555	2.5108	4.97754	2.1763	3.89555	5.63384	3.26981	4.51382	5.88102	3.1614	2.41575	6.13593	2.74213	5.60784	3.83561	5.22275	3.17856	3.58761	3.01157	4.78339	4.12748	3.89826	0.884893	0.239105
SLURP2	no	no	1.14361	0.998039	-1.82158	5.24099	2.40246	0.929618	2.01268	5.50113	5.67524	5.16095	1.38382	3.51746	6.21034	5.76764	1.9216	2.8696	5.08419	3.78911	5.13318	5.37877	2.00853	4.63605	4.4827	5.51655	3.34589	5.59153	6.13764	7.26729	3.73302	2.99743	5.09433	0.787204	5.32748	4.78116	2.65425	0.0244887
LYNX1	no	no	-3.11003	-3.31424	-3.54576	-3.77539	-3.56527	-3.35378	-3.29626	-3.51264	-1.86262	-1.57019	-3.65132	-3.36512	-3.56331	-3.97018	-3.30705	-3.38027	-3.97797	-3.11498	-3.28979	-2.31105	-2.98531	-3.72983	-2.83736	-2.99458	-3.65185	-3.53745	-3.26984	-3.48431	-3.65663	-3.36574	-1.5978	-2.38814	-3.7047	-3.15801	0.351172	0.0493153
IGHV3-38-3	no	no	-2.75589	-2.609	-2.03947	-2.04256	-2.06203	-2.61243	-2.32313	-0.848267	-0.35226	1.24589	1.30167	1.44944	-2.31543	0.912687	1.49693	2.60545	-3.87763	-2.63451	-0.748691	-2.50087	-2.55352	-0.12581	1.93317	-1.24113	1.37223	0.48464	-1.08199	-0.341689	0.0828149	1.38199	-0.490103	0.660043	-0.506567	-0.012632	1.88265	5.87055e-05
AMY1B;AMY1C;AMY1A	no	no	-1.05357	-1.37576	-0.663373	-0.480449	-2.68757	1.9676	-1.51032	2.58034	4.17159	2.89756	-2.55656	2.08845	2.77781	3.38833	-0.619143	1.59725	5.46314	2.74291	1.70913	-0.983925	2.93624	3.3701	3.21921	-1.92788	1.72303	2.22539	4.49388	0.0135694	4.90202	3.37861	3.74832	0.559708	1.70515	1.55562	3.2417	0.00101203
FDX1	no	no	-2.58711	-2.5541	-3.18194	-1.41974	-2.76024	-3.05825	-2.92123	-3.38701	-2.69779	-1.58331	-2.87351	-2.99377	-2.32304	-1.20391	-3.56474	-2.46986	-2.83059	-0.842297	0.464743	-2.01495	-3.06253	2.28001	-2.57966	-0.914573	-2.67012	-0.836316	-2.7226	-0.290604	-2.80513	-3.31828	-1.3904	-1.96786	-0.23287	-3.02443	0.517203	0.198138
SRGN	no	no	-1.33859	0.721019	-0.84991	-0.988628	-1.04886	-0.411047	-0.774924	0.814319	1.81768	1.78715	4.05593	3.99146	-0.298187	0.574386	0.418306	1.81349	-1.72005	-0.165658	1.60659	0.127824	-3.21385	0.459048	0.887904	1.38925	1.68809	2.45305	-0.0240735	1.69156	1.17537	1.39552	0.146269	2.20847	2.46826	1.2848	1.38466	0.00244442
CXCL8	no	no	-2.4726	-3.26955	-3.4852	-2.51316	-2.88737	-2.97626	-2.5384	-1.84982	-3.35957	-0.0721961	-0.545323	0.274655	-2.00693	0.553141	-2.7711	-3.03236	-3.05537	-3.38357	-1.06052	-2.26711	-3.07242	-2.60424	-1.32708	3.20537	-0.954235	0.128432	-2.57663	-3.78359	-0.500363	-1.88323	-1.76514	-1.00486	-2.07052	-1.00716	1.28869	0.00123203
RNASE2	yes	no	6.43818	4.32345	2.86849	7.74509	4.56534	7.44281	4.81486	8.21429	8.6897	8.6524	5.75867	7.4863	9.59943	9.22247	3.91861	5.95378	8.05663	6.01568	9.03161	7.01194	7.69161	6.72874	6.78383	8.01791	5.92662	7.3837	7.24341	9.96434	7.13053	6.6035	7.34948	6.00168	8.11273	7.57152	1.95501	0.0437193
RO60	no	no	-2.87688	-2.15689	-3.01127	-2.67209	-2.59758	-2.47796	-2.86173	-2.7438	-0.995021	-1.8327	-1.11215	-0.425721	-2.1868	-2.32235	-0.845308	-1.00954	-2.71368	-0.798105	-2.30116	-2.80788	-3.01577	-1.23794	-2.52376	-1.59816	-1.28327	-1.96901	-2.41811	-2.13837	-2.94611	-2.63057	-2.0451	-0.497879	-0.272886	-2.65139	0.607478	0.00340699
GAA	yes	no	0.362757	2.12216	1.21297	1.72053	2.15746	3.95642	1.31532	6.08082	5.04893	5.17227	1.32168	4.27464	4.98705	5.78084	1.05267	4.52122	5.2826	3.00349	6.19742	2.84484	4.71156	3.59865	5.59155	4.90307	4.12866	4.93895	4.15235	6.42274	4.28711	4.54874	4.31851	3.37522	6.32564	3.91575	2.5268	0.000851473
RRAS	no	no	-4.00432	-4.39577	-4.47867	-4.36123	-4.72076	-4.64569	-4.38721	-4.88983	-3.84442	-3.85269	-4.32497	-3.60348	-2.13622	-3.56082	-4.11046	-4.31233	-4.25174	-4.2359	-3.44667	-4.49986	-3.02375	-4.67235	-4.2925	-3.56501	-3.89184	-4.58245	-4.67276	-2.57717	-4.3119	-4.16753	-3.52274	-4.05386	-2.22827	-4.37625	0.47471	0.00922366
HLA-C	yes	no	-3.33287	-2.99813	-2.76795	-2.26569	-3.7472	-1.9046	-1.93218	-1.943	-1.06483	-1.27153	-2.27945	-0.768924	-0.640705	-0.926917	-2.26689	-0.682814	-1.58471	-4.15214	-0.299296	1.65231	-1.36529	-1.86627	-1.73708	0.471738	-4.47812	1.85786	-0.457014	-0.279147	-1.81101	-1.6417	-0.267885	-0.825687	-1.23303	-1.82586	1.63463	0.000817705
H1-4	no	no	2.03153	1.45079	-0.31836	3.90923	-0.164895	3.06689	0.67612	5.47386	4.69543	4.6874	3.48295	5.12142	3.06061	3.5547	3.14878	5.61725	1.371	0.389499	2.80037	4.70741	5.90507	2.40176	0.657873	8.0648	4.3611	4.4985	2.66334	2.7303	1.72949	2.82418	2.68155	6.2143	4.44339	5.79572	2.20677	0.00885742
SPP1	no	no	8.06503	7.13001	5.69658	8.88117	5.35614	7.68045	8.36366	8.81583	9.30938	9.3445	5.75481	6.26539	10.5975	9.84988	3.16332	6.39241	9.59049	5.74503	9.20964	7.00374	10.3063	9.51764	8.78314	10.5159	6.55471	9.97647	8.19615	10.6678	7.04757	7.70819	9.02469	6.6359	10.6209	9.80413	1.0748	0.148904
DLAT	no	no	-2.77962	-2.8412	-2.70665	-2.37831	-2.81609	-3.29986	-2.74983	-1.86944	-0.783565	-2.92027	-2.79236	-2.39424	-2.81509	-2.07198	-2.43288	-2.61029	-2.76065	-2.65359	-0.832472	-0.413311	-3.15767	-1.66507	-2.90557	-2.15664	-3.23282	-2.86362	-2.81521	-1.70041	-2.7562	-2.716	-1.19963	-2.74233	-1.86018	-2.31894	0.587685	0.00605168
PTPRF	no	no	-2.28458	-2.49034	-2.51209	-2.31107	-2.48519	-2.64313	-2.39853	-0.974468	-1.18741	-1.42688	-2.25022	-2.52323	-1.20253	-0.995398	-2.13816	-1.14536	-1.96942	-2.267	-1.62788	-1.81025	-2.1843	-2.41477	-1.23648	-1.84813	-2.12578	-1.8138	-1.92733	-1.07139	-2.21304	-1.98241	-2.30233	-1.11757	-1.83816	-2.24212	0.525756	0.00011369
TXN	no	no	-0.0694226	-0.916202	0.665365	5.67702	4.09168	8.69773	0.78557	5.26502	5.65078	5.35158	6.19753	5.50442	4.84719	5.03838	4.67158	3.23338	3.83596	5.54719	5.67546	3.82212	5.13566	4.49049	4.09309	6.63104	4.21596	5.03383	3.48851	4.25466	2.93799	4.87104	3.2751	5.04666	5.09909	5.93676	2.07882	0.222797
COX5B	no	no	-3.40802	-3.0886	-3.82971	-2.58071	-3.52255	-3.86808	-3.88523	-3.73123	-1.89854	-1.34172	-2.80297	-2.60691	-3.5606	-1.84894	-3.70294	-2.98475	-3.73893	-3.67718	-1.51845	-3.01064	-3.24826	-4.22449	-3.26352	1.62923	-3.13521	-2.82923	-1.52049	0.0808163	-0.695332	-1.00772	-3.21173	-2.62561	-1.55271	-1.68981	1.11698	0.00166303
CTSA	yes	no	0.421856	0.803002	0.681464	-0.388426	0.186629	0.10137	0.329358	2.90298	3.92577	3.02186	-0.516225	4.23038	1.83272	4.80951	0.353222	1.10183	0.209226	0.274166	3.61555	1.00723	0.40224	2.35236	2.81384	2.31117	1.88932	3.88127	2.62447	4.41286	1.75266	1.31623	4.02764	2.19234	2.94653	0.702974	1.89012	1.10902e-05
C7	no	no	2.10386	2.1832	2.17027	3.79074	2.25563	4.1636	1.59956	1.50052	3.20338	4.3462	3.95681	4.73392	1.76843	3.26117	4.3841	4.74616	4.76527	1.16129	2.01017	1.77557	3.07421	3.56046	3.79301	3.29697	3.0537	3.37191	2.18234	2.73654	3.36977	4.08807	2.64322	3.52816	3.64458	3.34383	0.773435	0.159113
PRKAR1A	no	no	-4.22876	-3.70155	-3.41141	-2.67751	-3.73146	-3.84609	-2.80458	-1.82684	-2.22953	-1.40317	-0.869601	-1.33851	-3.25868	-3.85616	-0.869815	-1.1651	-3.81447	-1.71036	-1.41633	-4.42478	-4.43662	-3.03738	-3.33156	-1.53477	-1.17735	-0.965508	-2.59964	-3.95711	-1.57229	-1.69653	-2.27399	-0.576842	-2.20187	-1.30908	1.17951	0.000214664
CHGA	no	yes	-1.67194	-1.11504	-1.20258	-0.535003	-1.78498	1.85612	-1.70785	1.45338	2.05789	0.272444	-1.43119	-3.0697	1.93715	1.14059	-1.78485	-2.34804	0.85968	0.867754	0.804991	1.31214	0.408227	0.588329	0.441124	0.309497	-1.36802	0.337673	0.916968	2.34742	-0.748795	-2.74433	2.13705	0.243935	0.539479	1.49581	1.41453	0.0706158
TFPI	no	no	-3.01122	-1.89546	-3.2892	-2.96882	-3.29432	-2.73193	-3.05762	-3.33469	-2.99767	-2.37988	-2.9821	-2.68968	-2.75319	-2.8521	-2.25935	-3.29971	-2.18209	-3.39049	-2.08553	-1.46941	-2.60945	-2.43849	-2.75788	-1.09859	-3.2687	-1.9301	-3.55879	-2.1951	-3.12649	-3.0994	-1.96593	-2.56611	-2.42444	-2.42886	0.255728	0.300267
KIT	no	no	-2.06446	-1.96587	-1.38373	-1.38383	-1.36762	-0.515026	-1.82417	0.776083	0.462451	-0.112337	-0.792052	-1.95227	1.11816	-0.230581	-0.523626	-0.183828	0.125474	-0.944083	0.394499	-2.45051	-0.416051	-0.195094	0.294371	-1.45891	-0.797014	-1.62236	0.414033	0.00816399	0.413088	0.0521351	-1.43304	-1.76967	0.0835954	0.700444	1.01514	0.00197227
ESD	no	no	-2.24548	-1.88485	-2.36131	-1.80527	-2.15812	-2.54558	-1.53878	0.391634	1.25523	1.24669	0.586602	2.17633	-1.46938	-3.13206	-1.25008	-0.287932	-2.27396	1.25177	0.572669	-1.5665	-0.0326109	-2.11605	-0.305787	0.262555	0.383769	1.64309	-2.07259	-1.21883	-1.29864	-0.545668	-0.487176	1.4964	0.245043	-0.220391	1.78096	8.69257e-06
HSPD1	no	no	-3.02691	-3.53579	-3.73965	-4.40237	-3.51295	-1.89736	-3.14831	-1.66695	-1.70744	-2.21459	-3.34606	-2.38721	-4.06617	-4.48926	-1.75548	-4.08485	-3.84432	-4.59189	-1.88282	-3.72136	-3.32255	-3.15609	-3.86571	-0.109071	-3.96465	-2.01414	-4.3375	-1.89132	-3.30676	-2.76144	-3.45797	-3.10399	-3.04011	-2.71938	0.612733	0.17781
CLU	no	yes	3.33269	-0.613303	3.62056	1.96338	2.97237	0.595043	4.26542	6.93246	6.3311	6.92483	6.89161	5.96476	5.95435	6.12441	6.74645	7.78291	5.17692	4.84603	6.3455	5.76618	5.1785	6.91526	6.69609	6.83408	6.83495	6.35635	6.02705	6.69975	7.16082	6.77711	6.0496	5.74792	6.27768	6.06863	3.91509	0.00293892
GHR	no	no	-3.60676	-3.4803	-3.24928	-3.70837	-3.99342	-2.22627	-3.59718	-2.27593	-0.886383	-2.90214	-3.39697	-3.31878	-1.1943	-1.97699	-3.5057	-3.71848	-2.94657	-3.96423	-0.862869	-3.36886	-1.41887	-0.610948	-2.48404	-3.74292	-2.67456	-4.18011	-2.09558	-3.23871	-1.85896	-3.00238	-2.10613	-3.81145	0.137315	-2.7286	1.07338	0.00913779
HSPA5	no	no	0.127136	-0.251365	-0.223245	0.441969	-0.281899	1.23195	0.0179319	2.17753	2.64379	1.86395	0.421207	2.42226	0.595755	1.48869	0.917275	1.40756	-1.64334	-1.01349	1.02695	0.540688	-0.0604839	1.71115	-0.111972	2.8741	1.04065	1.64286	0.313432	0.929843	0.834875	1.44755	-0.154222	1.96443	0.687221	0.825865	0.970255	0.0125171
LAMC1	no	no	-2.01644	-2.24365	-1.92517	0.313734	-1.2277	-0.485188	-2.35103	0.167634	0.0750649	-0.110087	-3.18863	-2.29591	1.00537	0.78911	-2.66181	-1.59119	0.644392	-2.28727	0.0558258	-1.47979	-0.262017	-0.578388	0.842752	-0.560847	-2.28456	-0.743884	-0.168425	-0.526511	-1.31103	-1.61745	-0.746992	-2.48481	0.265541	-0.669541	0.889057	0.157337
ACP2	no	no	-0.985319	-0.849176	-0.850805	-1.07017	0.255875	-2.835	0.129893	3.39724	3.53298	3.89262	-0.325094	3.35562	1.54731	3.96939	-0.765732	3.36607	-0.957945	-1.59999	3.45783	0.828196	1.71278	2.02348	3.31916	3.76147	2.74438	1.64872	1.46474	4.07683	2.45735	2.25583	3.24721	1.9184	3.89961	0.903296	3.23483	2.24908e-05
HSPA8	yes	no	-0.955002	0.234471	-0.351987	-1.05165	-0.364715	-0.088295	-2.32812	3.03902	3.20455	2.70612	3.08369	3.07991	0.9809	0.269391	2.23223	2.45482	-0.102713	1.93823	3.09941	1.20355	0.944366	0.749869	1.16896	1.54087	2.53752	3.32937	1.33776	1.56217	0.918187	1.73327	0.966776	4.22049	2.43993	1.67395	2.3998	0.000559606
SLC2A3	yes	no	-4.22456	-4.27922	-2.98992	-4.08739	-4.00663	-3.86504	-4.69186	-3.7185	-4.45915	-3.61276	-1.91507	1.33295	-4.24158	-4.16654	-2.20538	-4.48884	-4.53915	-2.73334	-3.29355	-3.81741	-3.78993	-3.75052	-3.77804	-1.09384	-2.54598	-2.51085	-3.49351	-4.46452	-2.39867	-4.16918	-2.35313	-0.367619	-4.53268	-4.17186	0.505824	0.207987
EPB41	no	no	-4.32475	-4.81452	-5.17211	-4.632	-5.43716	-5.34494	-5.00511	-3.74246	-4.75674	-4.92631	-4.02985	-4.84557	-4.30002	-4.8792	-4.67259	-5.02728	-4.96442	-2.87382	-4.64974	-3.21774	-3.08222	-4.87439	-4.81175	-1.53899	-3.57925	-0.809477	-4.2222	-3.03443	-5.30301	-5.44662	-4.95907	-3.45561	-4.86068	-3.3986	0.840794	0.0108528
ITGAM	yes	no	-2.08794	-2.34468	-2.30173	-2.39611	-1.70013	-2.88974	-1.46487	-1.23473	-2.12848	-0.150027	1.0587	3.74435	-0.916045	-1.5581	-0.0872101	-0.184944	-1.17198	-2.075	0.808934	-0.375855	-1.68974	-1.12284	-2.3353	2.20406	0.797634	2.13544	-1.94931	-1.27426	1.10716	-0.235164	-0.161977	2.23527	-0.82425	-1.73102	1.70835	0.000126343
PYGB	yes	no	-4.19537	-4.01111	-4.33012	-3.78419	-4.24546	-3.00657	-3.56102	-1.6078	-0.914884	-3.32728	-4.13498	1.00049	-4.49273	-4.23826	-0.880966	-4.03974	-3.96352	-3.57205	-1.33521	-4.24141	-5.09328	-4.26337	-3.26697	-3.4263	-3.87472	-2.63635	-3.76714	-3.82575	-3.47661	-3.71031	-2.49878	-0.835911	-4.55216	-4.43984	1.09188	0.00479466
PYGM	no	no	-2.29508	-2.38254	-2.5043	-2.46482	-3.12088	-1.56985	-1.75957	2.64342	1.52928	-0.764665	2.72235	4.1714	-2.02152	-1.49056	3.66688	3.21356	-2.18765	2.15348	2.93334	-1.48768	-1.35943	-1.32648	-2.18169	-1.00493	2.97995	1.25524	-0.720144	-2.35042	0.418976	1.74705	0.390875	3.96387	-1.89392	-2.28905	2.70528	0.000167073
MBL2	no	no	-1.32236	-1.27966	-2.2363	-0.728133	-0.837422	-2.43251	-1.68196	-0.560413	-0.942357	2.19783	2.44674	2.28338	-0.307391	-0.344549	2.37635	3.20249	-1.09376	-0.80507	-1.65965	0.308172	-0.599975	1.18096	0.423742	-1.31567	2.38243	-0.955511	-0.777871	-2.03825	0.652417	0.631925	-0.641202	-0.187661	0.458851	1.86702	1.60789	9.17699e-05
RALA	no	no	-3.39935	-2.96499	-3.68863	-2.5535	-3.1906	-0.336642	-3.13809	-0.715973	-2.14654	-2.35551	-2.90113	-3.05533	-1.53732	-2.20311	-3.36166	-3.13306	-1.1434	-1.80845	-1.61711	-3.19676	-0.981461	-2.35933	-2.04054	-2.50707	-3.03742	-3.22188	-2.50755	-1.76606	-2.47223	-3.16164	-1.74793	-3.20999	-1.35438	-3.30215	0.343693	0.523008
RALB	no	no	-2.4236	-2.74514	-2.98831	-2.99378	-2.34234	-2.06266	-2.52451	-0.97294	-2.05177	-1.42222	-0.801303	-0.906356	-1.72861	-2.1427	-1.85913	-0.459995	-1.75497	-2.81888	-1.86141	-2.39792	-1.47284	-2.95362	-2.27155	-1.50277	-2.51825	-2.0708	-3.35496	-1.73186	-2.70592	-1.96542	-2.7447	0.0933805	-1.20874	-1.94381	0.816615	0.000997494
BCR	no	no	-5.33277	-4.9753	-5.08293	-4.38289	-5.43763	-3.04107	-4.27627	-5.52387	-4.53722	-4.99968	-4.50192	-5.08052	-5.67431	-5.56736	-3.95747	-5.38695	-5.3141	-4.83756	-5.09158	-5.00103	-1.23859	-4.90667	-5.07763	-5.52807	-5.33735	-5.42935	-5.06537	-4.24994	-4.90317	-5.57446	-4.90486	-4.94261	-5.57053	-5.28456	0.216515	0.635823
LAMP1	yes	no	1.32493	3.60129	3.2345	3.44835	1.28126	4.79289	0.349283	4.3484	4.00727	4.06272	1.17404	3.86332	5.0246	4.75009	2.16014	2.38943	6.27622	3.72431	4.91937	4.20693	5.92399	3.54659	4.29888	4.68739	2.68971	2.94571	3.38825	6.16193	3.06579	3.13825	3.48663	2.98168	5.6372	3.6171	1.22832	0.113494
FGFR1	no	no	1.88368	1.36845	0.0918122	2.12443	0.389269	2.83645	0.450363	1.40209	1.83731	1.34844	-1.05851	-0.735406	2.81456	2.6159	-1.08203	-0.764074	2.23368	0.442921	1.99587	1.01722	2.17791	2.05904	1.13436	1.24071	-1.13132	0.629363	1.65873	2.04827	0.225864	-0.37707	2.21875	-0.218174	2.05229	1.65452	-0.29001	0.603676
G6PD	no	no	-2.68413	-2.67107	-3.20498	-2.44258	-2.72905	-3.54144	-2.47644	-1.0332	-0.416544	-0.556989	1.74485	0.888672	-3.02069	-2.90202	0.797624	0.49079	-2.76888	-0.215948	-0.123934	-2.9622	-2.38519	-3.48532	-2.46595	-0.913483	-0.0172512	0.0385813	-3.25634	-3.86044	-1.58932	-0.743569	-1.48006	2.02023	-1.61755	-2.1469	1.65874	0.00262638
MTHFD1	no	no	-3.44685	-3.876	-4.10493	-4.12316	-4.0018	-3.88446	-3.50301	-1.32165	-1.74258	-1.87033	-4.13895	-2.67151	-3.57922	-4.0015	-2.67805	-0.96008	-3.2162	-3.83971	-3.24167	-2.04889	-3.82142	-1.88803	-2.12574	-4.38398	-2.667	-1.98668	-2.28115	-2.33688	-3.90344	-2.0631	-4.29468	-1.92458	-3.87538	-3.87184	0.963506	0.000424251
CETP	no	no	-1.20788	-0.912761	-1.41723	-1.75989	-1.15162	-0.851916	-1.38378	-0.131419	-0.0843303	0.643185	-0.535641	-1.18679	-1.37889	-0.0244309	1.14401	0.183767	-1.16506	-1.52796	1.92364	-1.62981	-0.550756	0.873596	-1.29041	-1.34134	-0.449454	0.231341	0.45089	1.07684	1.87951	0.741263	0.518761	-0.347546	1.78518	0.911146	1.53541	6.37408e-06
EPX	yes	no	-2.83441	-2.51152	-2.87107	-3.43049	-2.67337	-2.80338	-3.1673	-2.7666	-3.18681	-3.20707	-3.36196	0.335255	-2.90783	-2.40622	-0.592613	-3.04492	-3.0504	-2.48554	-3.04217	-2.72739	-2.95448	-2.46949	-2.85879	-3.19711	-2.67604	-1.89677	-3.82859	-3.37697	-3.18372	-3.07687	-3.24443	-1.54065	-2.90262	-2.62453	0.217649	0.345044
SCGB1A1	no	no	-3.61726	-0.906464	-2.93117	-3.89678	-2.70966	-5.19126	-2.84372	1.08418	3.76187	3.15597	-0.720792	3.22502	1.19771	3.50501	0.819813	-4.79933	-3.58597	1.06318	5.7965	2.31763	1.60275	2.36433	-3.88925	4.12915	-4.21217	5.38411	3.99311	6.162	0.838891	-3.32865	2.95935	2.12162	4.07422	0.926631	4.43354	6.89023e-05
IGF2R	yes	no	-0.863735	-0.890004	-1.36824	-0.650851	-0.757452	-0.764359	-0.930003	0.184621	0.375059	0.269856	-0.585565	0.17332	0.411862	0.762999	-0.869258	-0.130398	-1.05409	-0.851733	0.469002	-0.992762	-0.310597	0.832231	-0.406974	-0.211704	-0.889587	0.0748868	0.584615	0.531062	0.224435	-0.935366	-0.222063	-0.783632	0.949185	0.393856	0.838462	7.92481e-06
ADH5	no	no	-2.02832	-2.42097	-2.11731	-2.01093	-2.08448	-2.32339	-2.24888	-0.0773915	0.954354	-0.326152	-0.349265	-0.711876	-1.61316	-2.6046	0.277507	-1.54451	-2.03124	-1.78292	-1.37025	-1.59597	-2.35725	-1.07773	-1.06845	-1.84394	-0.882275	-0.211422	-2.13828	-0.76573	-1.22917	-0.51131	-1.29555	0.19604	-0.645442	-1.53019	1.16911	6.44999e-06
PABPC1	no	no	-4.43066	-3.79609	-4.09491	-3.38194	-3.93919	-4.9698	-4.01178	-0.218142	-0.88358	-2.55161	-1.38033	-1.83685	-4.25393	-4.55608	-1.27413	-1.90459	-4.51028	-1.27331	-1.54541	-3.20724	-3.70301	-2.49251	-4.10048	-1.69924	-1.6973	-0.863362	-2.86936	-2.66069	-4.78748	-2.86806	-3.70174	-1.21383	-3.06777	-2.677	1.21474	0.000199459
KRT3	no	no	#NUM!	#NUM!	#NUM!	#NUM!	#NUM!	-1.13999	#NUM!	#NUM!	#NUM!	#NUM!	#NUM!	#NUM!	#NUM!	#NUM!	#NUM!	#NUM!	#NUM!	#NUM!	#NUM!	#NUM!	#NUM!	#NUM!	#NUM!	#NUM!	#NUM!	#NUM!	#NUM!	#NUM!	#NUM!	#NUM!	#NUM!	#NUM!	#NUM!	#NUM!	#N/A	#N/A
HARS1	no	no	-3.34098	-3.15317	-3.41397	-3.26089	-2.97582	-3.14447	-3.19844	-2.66356	-1.65095	-2.78778	-1.70041	-1.7205	-3.44044	-3.00596	-1.76387	-2.19317	-3.45737	-1.95913	-2.49775	-3.24907	-3.15712	-3.26906	-3.46746	-3.38784	-3.43466	-2.41049	-3.18601	-3.31171	-3.37066	-2.9443	-3.04636	-0.730472	-2.10485	-3.24064	0.579495	0.0034495
FABP2	no	no	-5.67135	-4.66339	-5.87276	-5.00891	-5.20813	-4.66713	-4.58837	-5.71294	-2.60304	-5.24261	-5.12419	-3.95504	-5.17074	-5.10677	-0.420548	-5.27912	-4.81102	-5.26977	-2.4225	-3.87612	-5.35111	-5.98219	-4.98457	-5.40294	-5.79016	-4.13084	-4.28183	-5.32122	-5.26498	-5.59482	-2.84292	-3.99966	-5.58212	-5.47951	0.419225	0.211726
COL6A1	no	no	-1.45448	-1.56205	-0.83413	-0.786591	-2.34666	-2.0166	0.774003	4.17033	3.65188	3.35671	-0.424911	1.14723	2.19278	3.77506	-0.784243	2.12989	-0.052751	1.97843	3.52701	0.791698	1.98028	3.1268	3.89752	1.57097	1.99541	2.16205	3.42757	3.79973	3.01795	2.34958	3.05671	1.2278	3.29636	2.91637	3.71353	5.38637e-07
COL6A2	no	no	-3.90768	-4.28804	-3.14378	-3.36968	-2.96589	-3.65166	-3.01845	-1.34708	0.214149	-2.43395	-3.61167	-2.48718	-2.7193	-1.9183	-2.35114	-2.59705	-2.70693	-0.942564	-0.0596585	-1.4661	-0.742675	-2.05765	-2.94842	-1.88915	-4.93369	-0.169383	-0.390789	0.0629946	-2.20144	-2.62336	0.859062	-2.63239	-1.74317	-2.13261	1.34643	0.000197183
COL6A3	no	no	1.43596	1.36264	1.64073	1.40654	1.63567	1.01738	1.61541	3.2866	4.2133	2.67695	1.77672	2.52356	2.32642	2.99514	1.79447	3.31681	1.84963	2.71212	4.01361	2.78867	1.85599	3.06078	2.09262	2.8906	0.215099	3.93933	2.99299	3.96083	2.30092	1.297	4.17601	2.66853	3.02425	1.78541	1.06724	5.66629e-05
F5	no	no	0.471025	0.31447	0.328663	0.140173	0.430661	0.483509	0.632866	1.13699	1.14428	1.89879	2.54923	0.736472	2.13901	0.802526	1.58363	3.74742	1.01121	0.550547	1.82125	0.504291	0.498791	2.85698	1.72916	0.873456	1.8655	0.829755	0.48708	0.802181	1.4675	2.14987	0.531878	0.950307	1.00815	0.908668	1.06815	1.97265e-05
IMPDH2	yes	no	-5.84521	-5.79215	-5.79766	-5.72777	-5.40575	-3.1979	-6.03251	-2.51312	-5.97512	-5.9914	-4.40965	-6.4157	-6.24785	-5.83299	-5.37705	-4.72415	-5.79353	-5.88499	-5.48338	-5.6532	-5.84823	-5.78936	-5.95916	-5.88107	-5.78977	-4.95442	-6.27777	-5.38606	-5.51631	-5.58595	-5.33603	-5.65782	-6.13888	-5.08443	-0.0144353	0.98024
TPR	no	no	-4.14966	-4.72489	-4.52436	-4.40471	-4.14486	-4.28559	-4.02291	-2.4665	-3.63141	-3.6694	-3.74613	-3.18386	-4.08233	-4.11266	-1.51426	-1.55751	-4.52285	-4.54889	0.250386	-4.2838	-3.48473	-5.12967	-4.18086	-4.7114	-3.57512	-2.8047	-4.46105	-4.06243	-3.98039	-3.50474	-4.65606	-0.966805	-4.37058	-2.90904	0.931214	0.00652424
PIP	no	no	1.40537	1.75982	-0.0477304	1.09256	-0.251099	3.25809	-0.597128	3.42765	3.74485	2.99355	-1.84455	-1.55747	4.93836	3.1269	-1.65971	2.5136	3.13625	1.95387	2.75881	-0.504334	3.11669	2.87013	3.586	-1.98755	1.33567	2.28557	3.86996	1.23435	1.10279	2.11532	2.2	-1.06923	2.1599	2.22735	0.834848	0.266286
CKB	no	no	-2.2179	-2.05423	-2.52784	-2.75087	-2.80192	-0.854945	-2.15715	0.852962	-0.332193	-1.08342	-2.1565	-1.94804	-0.169335	-1.67909	-1.39889	-2.10078	-2.55803	-0.850827	-0.48706	-1.51195	1.71383	-1.17885	-0.653723	-1.81351	-2.33276	-1.38702	-1.61807	0.375736	0.893108	-0.520895	-1.83782	-2.1223	-0.526297	-1.50058	1.21671	0.00436248
FCGR2A	yes	no	-4.27683	-4.16992	-3.96003	-4.2737	-4.10204	-3.94288	-3.94658	-4.36597	-3.41746	-2.85379	-3.8131	-2.59095	-4.24561	-3.48051	-4.19448	-2.66571	-4.23759	-4.27361	-2.22113	-4.15756	-4.35336	-2.68566	-4.3638	-4.35016	-3.78191	-2.52424	-2.7079	-4.60442	-3.61866	-2.22276	-3.55705	-4.53372	-2.49964	-2.42206	0.538345	0.00623729
ANXA3	no	no	-0.632962	-1.34975	-0.0201244	0.702156	-1.44551	-0.813666	-0.500284	3.79553	0.0574422	0.595	6.87863	5.99368	2.98016	1.47232	5.20973	1.93911	0.171419	5.20688	2.40362	2.21596	1.10458	-0.250674	2.29473	7.10648	1.55649	5.46806	0.964975	0.510918	1.05939	3.36788	2.4669	2.73657	2.51652	3.66061	2.59436	4.90626e-05
CKMT1A	no	no	-2.21843	-1.86315	-2.00429	-1.73295	-2.1987	-0.105094	-1.83447	-1.3386	-1.23683	-2.27039	-2.03693	-1.30179	-2.24183	-2.42213	-0.936826	-2.28873	-2.23148	-2.28936	-2.1162	-2.28105	-2.57966	-1.98314	-2.13079	-1.28654	-2.33598	-2.69772	-1.99118	-2.11143	-2.20612	-1.15665	-2.40171	-2.16105	-2.54374	-2.20403	-0.0923868	0.825286
BMP2	no	no	-5.56169	-4.98963	-4.91296	-4.01433	-5.00113	-4.79719	-4.38704	-4.87999	-2.0259	-4.87439	-4.81428	-5.70659	-4.7933	-3.958	-5.12912	-4.506	-4.92066	-4.78047	-3.1103	-1.4811	-4.86135	-5.39978	-4.61888	-1.58923	-5.41837	-4.82693	-2.77595	-3.21954	-4.90361	-6.09003	-1.26201	-4.96809	-4.6552	-5.1391	0.83479	0.00875995
RNASE3	yes	yes	-2.30739	-0.773484	-2.4027	0.621894	-1.30928	-1.51395	-3.38474	-0.858251	-0.296189	0.163218	3.21383	6.2178	1.66502	0.694037	2.16845	1.94496	-1.95857	1.74788	1.22819	-0.391197	-1.84266	-0.167794	-1.20649	6.16091	1.47373	1.9017	0.21723	-1.04662	0.840238	-0.791428	0.629056	-0.338627	1.79129	0.36225	1.95418	0.00391917
ACTN1	no	no	-1.10502	-1.21877	-0.188327	-1.09102	-0.341779	-0.962455	-0.657845	2.51602	3.30655	2.09033	4.80843	4.79634	-0.0766479	-0.394545	4.64398	3.58952	-0.875252	2.53552	2.57465	-1.27695	-1.46636	-0.69233	-0.915253	1.69112	2.26003	2.96123	-0.506883	-1.07989	1.40747	2.43542	2.14064	5.55372	0.0218187	0.0746055	2.4821	2.44579e-05
ACE	no	no	-2.37295	-2.6426	-2.30293	-2.2248	-2.53626	-2.11211	-2.18012	-2.05252	-0.885544	0.345767	-2.24098	0.0540557	-1.39849	-0.504106	1.61149	-1.3888	-2.16963	-1.84658	-0.729471	-2.25308	-0.950029	-0.633516	-1.28125	-1.20331	-1.20556	-1.22964	-1.66544	0.271172	-1.07877	-1.35127	-0.516359	-2.5383	0.444874	-2.14378	1.25429	3.89134e-05
CDH1	no	no	-0.159322	-0.714067	1.19479	-0.210596	0.12103	1.63976	0.0661079	6.00697	3.7049	2.39825	2.71948	3.74026	5.16741	3.65251	3.28543	1.31026	4.2262	5.86145	3.75146	5.98701	4.03538	5.24842	0.769265	3.7068	0.874146	5.61343	5.27578	6.69362	4.05634	3.34462	5.04133	3.10912	5.82064	4.16683	3.84915	1.72192e-06
DEFA4	yes	yes	-3.60168	-3.97306	-4.80298	-4.36223	-3.96061	-4.19156	-3.36169	-4.62468	-3.53601	-2.07341	-1.26122	2.1122	-3.00182	-2.86904	0.556751	-4.95499	-3.83001	-4.07043	-3.14159	-3.65401	-5.3571	-4.92101	-4.11218	1.52374	-1.70212	-1.8768	-5.01093	-2.8505	-4.29211	-2.77826	-3.5585	-0.128316	-1.81979	-2.71808	1.35662	0.0118751
MLN	no	no	-3.26418	-2.8691	-3.60088	-3.81483	-2.99517	-4.45848	-4.08252	-0.36145	1.27102	-2.42321	-3.89219	-3.51718	-3.79418	-1.48983	-2.60107	-3.13289	-4.12441	-4.1782	-0.303227	0.198431	-1.72742	-3.77508	-2.85391	-3.72858	-3.23306	3.25371	-2.63187	2.58261	-3.8986	-2.18567	0.108578	1.28342	-2.10307	1.03082	1.26748	0.0187159
MYH1	no	no	-2.92929	-2.52525	-2.97678	-2.92773	-2.39465	-2.23164	-1.87696	-1.77176	1.18222	4.58062	0.698312	2.05468	-2.60554	0.0125494	-0.791326	-2.6544	-2.58626	-0.665778	-0.184758	-1.48069	-0.160261	-1.95894	-3.05614	-3.59294	-3.39733	-2.58979	-0.197835	-2.27902	-2.13197	0.27292	-2.84847	-3.09753	-1.25887	-0.136628	1.24307	0.00592752
MYH7	no	no	-5.24551	-4.17049	-5.01665	-4.15811	-5.64885	-4.76089	-6.03595	-5.63515	-4.11723	-5.49762	-5.00646	-5.52071	-5.12905	-4.854	-5.47147	-5.58135	-5.89676	-5.1439	-4.97727	-4.96699	-4.62774	-5.86604	-4.77808	-0.380991	-5.06123	-4.57616	-5.0591	-4.07621	-5.61261	-4.70998	-2.50918	-5.49857	-4.85123	-5.32881	0.184167	0.589688
SRC	no	no	-4.30224	-4.09869	-4.40597	-4.03656	-4.27652	-3.96862	-4.29214	-1.72279	-3.88904	-3.28548	-3.83139	-3.46971	-4.56791	-4.34816	-4.67951	-3.90531	-2.06415	-3.35358	-4.37788	-4.1068	-3.68397	-3.75234	-4.31849	-1.9283	-3.72921	-3.99481	-3.85102	-2.11015	-4.26883	-3.8786	-4.06914	-4.87258	-2.56522	-4.21264	0.480978	0.035753
PEPD	no	no	-2.27983	-1.25812	-1.86348	-2.13375	-1.66208	-1.73874	-1.96781	0.0835905	1.50776	0.747787	-0.535659	1.33654	-2.45322	-0.829926	1.78138	0.626795	-1.72592	-1.45158	-0.0986202	-1.9491	-1.21475	-0.630267	0.703617	-3.3025	0.731825	1.08082	-1.47574	0.922503	0.546545	0.963762	-0.994431	0.0735302	0.496963	-0.567279	1.60864	1.45628e-05
XRCC6	yes	no	-3.43481	-3.65161	-3.59228	-3.36777	-4.14676	-4.00225	-3.19994	-1.42832	-2.06308	-3.67287	-2.72515	-2.15561	-3.13872	-3.2708	-0.588414	-1.52784	-3.88868	-3.79635	-3.33104	-2.91572	-3.55154	-3.40239	-3.61633	-2.45429	-2.71945	-3.61113	-3.59866	-3.44182	-2.70594	-3.08197	-4.05018	-0.800651	-3.53804	-3.1846	0.683955	0.0147603
XRCC5	yes	no	-3.19265	-2.59229	-3.86657	-3.71466	-3.43513	-3.45214	-3.73476	-1.37396	-2.43648	-3.1556	-3.24725	-3.61477	-3.05683	-3.20874	0.198167	-1.00461	-3.62208	-3.38392	-3.11491	-3.12644	-3.18444	-3.31055	-3.43475	-1.32513	-3.39132	-2.73431	-3.74885	-2.61755	-1.58066	-1.92519	-3.14787	-0.425647	-2.97	-3.31872	0.718661	0.0141577
COX4I1	no	no	-2.77187	-2.58112	-2.52363	-2.50091	-3.11459	-2.90075	-2.95394	-2.4521	-1.28946	-2.06768	-1.8552	-2.68685	-2.82286	-2.71557	-2.68313	-2.41601	-3.03109	-2.26867	-2.51756	-2.64008	-2.28975	-1.69354	-2.91278	0.139295	-2.52575	-2.13886	-2.38041	-2.57043	-2.70415	-2.81418	-2.74022	-2.63661	-1.55777	-1.47452	0.447623	0.00875995
IFI30	no	no	-2.71865	-0.91484	-1.89287	-0.784962	-1.97666	1.09118	-3.49441	1.86664	1.05239	0.323168	-1.10846	1.03325	1.51307	1.77798	-1.66466	-1.2606	2.11314	-0.694026	2.30304	-0.134473	1.63037	1.03621	1.01578	2.46069	-0.798953	0.491761	-0.0820882	3.23136	-0.0675681	-1.22945	1.50114	-0.630993	3.46831	0.561639	2.25727	0.0106842
LAMP2	yes	no	2.45498	3.45992	2.22405	3.55943	2.1637	4.69819	2.1101	2.72333	3.09581	3.59375	0.615719	2.96752	4.05518	3.3013	0.728541	1.98141	5.9759	1.45789	4.76653	3.00851	5.07557	2.83683	3.67986	3.05673	1.61799	2.07703	1.87714	4.79182	2.48515	3.3705	2.8359	0.953774	4.98822	2.69146	0.0326239	0.958266
RNH1	no	no	-2.29163	-1.80547	-1.44858	-1.19516	-1.90949	-2.83518	-2.41576	1.99035	2.08613	0.730269	1.87487	1.81966	-0.621438	-2.78195	1.99086	0.280015	-3.30386	1.31613	1.46091	0.459084	-1.13521	-0.453626	-0.434987	-0.326308	0.932584	1.63465	-0.610535	1.09736	-0.00827451	0.457608	-0.443793	2.8986	1.72669	0.865477	1.98304	0.000443449
BMP1	no	no	11.7787	11.8966	10.0014	11.9008	10.8618	10.7648	7.25654	9.13366	9.08831	8.98947	8.6028	8.07158	9.82219	8.93314	6.31159	7.35194	5.99536	9.47103	6.95366	6.90567	4.13796	5.4144	1.34084	6.33713	7.05336	7.85228	9.12461	8.57668	9.49352	9.14692	8.91701	7.01182	8.09548	8.84555	-2.97905	0.00400642
CCL2	no	no	-4.26057	-2.79354	-4.3116	-4.29697	-3.74262	-4.05721	-4.86673	-1.78136	-3.33082	-1.91065	2.21233	-4.08023	-1.66482	-1.88979	-4.43673	-4.04861	-0.632284	-4.38371	-3.18487	-6.01007	-4.38107	-2.88729	-4.04421	2.75714	-4.17849	-1.79396	-2.95067	-0.309993	-2.89616	-4.57199	-2.52339	-3.94444	-2.39637	-1.6967	1.62678	0.0014285
SCG2	no	no	-3.78306	-1.53364	-3.10455	-4.27261	-3.51446	-1.05752	-3.89438	-1.28591	-0.121094	-3.13506	-4.41834	-2.84842	-0.948403	-1.05934	-3.64941	-3.43823	0.76146	-3.44726	-1.80919	-2.05401	-3.02751	-1.56148	-3.65332	-2.36719	-3.59636	-1.30386	0.512131	0.72653	-4.24944	-4.37052	-2.62654	-2.20129	-1.80583	-1.95291	0.569421	0.324479
NCAM1	no	no	2.55981	2.8397	1.12366	4.51881	2.19603	4.0621	1.82952	4.5815	5.02985	4.21679	2.51324	2.18356	5.3448	4.77084	2.39274	2.90849	5.44502	3.72359	5.04112	3.41105	4.05905	4.53484	4.26288	3.07801	2.56241	3.33153	4.77811	4.94836	3.66169	2.74241	4.04949	2.68109	4.91264	4.39268	0.983749	0.0936684
ICAM2	no	no	-0.541098	-1.06345	-0.139277	2.95356	-1.347	1.65475	-2.22628	3.82513	3.32505	2.49785	-0.438949	1.14911	3.95031	3.38938	-0.0913131	1.59161	3.51445	2.66011	4.6146	1.12192	3.26112	2.60231	2.79735	0.574006	0.74346	1.89336	3.37391	2.99122	3.32524	2.57087	2.93332	1.77003	4.29516	3.59844	2.71361	0.0120171
VCAN	no	no	1.54465	0.346401	0.0806092	1.46286	0.46431	0.854641	0.14789	1.12725	1.21602	0.832552	2.22794	1.27716	0.925672	0.488611	0.626525	1.38339	2.07906	-1.33765	2.00101	0.0200608	0.290001	1.28959	0.719537	1.39749	1.88688	1.68053	0.615229	1.70004	1.96122	1.7789	1.32485	0.683301	1.67592	-0.0263629	0.597357	0.135838
EEF2	yes	no	-2.31508	-2.79188	-3.15818	-3.02949	-2.2484	-3.3973	-2.97667	0.536287	0.575055	0.108861	0.673784	0.442931	-2.33054	-2.24779	1.90942	0.00375886	-2.92608	-1.57126	-0.665808	-3.47508	-2.05708	-1.79539	-1.31042	-0.969593	0.00857681	0.0813352	-1.83415	-1.99647	-1.26647	-0.38706	-1.97847	1.52173	-2.0466	-1.74345	2.02587	9.95891e-06
MT1G	no	no	-1.23021	1.88355	-2.05242	0.61426	-2.05668	3.03048	-1.56151	-0.786843	1.59323	1.80018	-3.86998	-0.299227	0.899535	0.781973	-4.31191	-3.89113	2.31588	-0.587804	2.52882	1.67001	2.15269	1.34768	-0.228525	1.49181	-1.9509	1.80624	1.19776	3.36498	-1.70256	-1.02064	0.34362	0.75395	3.06483	-0.704614	0.93842	0.459264
KRT10	no	no	4.21328	0.818999	3.55137	3.77012	2.64475	2.02013	5.24454	5.35162	2.42808	1.61051	0.0113799	2.66355	5.30234	3.62517	0.810347	1.22218	5.54463	7.4398	2.99655	2.15308	5.13436	2.74799	1.97463	2.40473	2.15087	2.00788	1.88795	1.3366	2.85692	2.61113	3.91353	-0.112542	2.42947	1.71587	-0.431617	0.587791
KRT13	no	no	-1.11437	-2.32801	-1.56179	4.72053	3.9498	5.32183	-2.40637	4.05591	3.80548	-1.43079	0.516201	-0.704259	-0.262563	6.61329	1.58572	-0.3317	-1.88831	-2.02638	-0.315404	-0.852838	3.00256	5.56447	-2.71721	1.22835	-1.14214	-0.508313	3.17954	-1.22267	-0.0104398	4.61842	1.04364	0.0888031	-0.305578	-0.623587	0.00493291	0.998181
KRT5	no	no	1.11344	-1.02324	-0.522611	1.75492	1.10786	3.10973	1.26551	2.93393	1.88089	-0.136724	0.384212	-0.292329	2.60161	3.19204	0.726295	-1.20872	2.76966	3.7286	-0.027689	0.510755	2.45215	3.05935	-0.986602	-0.556435	-0.708465	-0.324753	0.632344	-0.363048	0.60051	2.1034	0.848144	0.305296	-0.685677	0.460592	-0.112564	0.882731
PDIA4	no	no	-2.97809	-2.51702	-3.08954	-3.25998	-2.7557	-3.40432	-3.16446	-0.805155	0.0108118	-0.822506	-2.82607	-1.98673	-3.41653	-2.3907	-0.771312	-1.79517	-3.38115	-2.74613	-1.44748	-2.31501	-2.87954	-1.60094	-3.02324	-2.17054	-2.6266	-1.45269	-2.51714	-0.969519	-3.13923	-2.40744	-1.33362	-1.88043	-2.69283	-2.50006	1.04585	2.78912e-05
C6	no	no	0.78308	0.341842	0.952229	0.855889	1.5348	1.67563	2.05344	3.36811	2.29422	4.65931	5.4412	4.32471	2.34056	2.67351	5.18418	6.21961	1.83704	0.796504	0.437488	2.81628	1.13611	5.25756	3.75561	2.87174	4.07679	3.20995	2.61887	0.298373	4.68597	5.59632	2.57376	4.1979	0.796958	4.36063	1.91694	0.000421061
CEACAM1	yes	no	-2.39692	-4.2874	-3.59132	-2.31972	-3.8746	-3.09	-4.6356	-3.44179	-4.13925	-5.35291	-3.8598	-4.05069	-1.69466	-4.0702	-3.8808	-3.51491	-2.1546	-4.33811	-2.73814	-1.73319	-0.434131	-1.64682	-3.72347	-1.20187	-3.89181	-4.26944	-4.66545	-2.13189	-3.36487	-4.2902	-4.29546	-5.03553	-3.89888	-3.84102	0.0427736	0.92464
TPT1	no	no	-4.04885	-3.53864	-3.93341	-3.71415	-4.16201	-4.1632	-4.01114	-2.20557	-2.44242	-2.74886	-3.51193	-3.24535	-2.30882	-4.58336	-3.18728	-3.47674	-3.94335	-2.73067	-2.9558	-3.85295	-3.47518	-3.88597	-3.15079	-4.04469	-2.72836	-1.63614	-4.06706	-4.42974	-4.3416	-4.31938	-2.71332	-2.18104	-3.24261	-4.16748	0.715214	0.000798108
ALAD	yes	no	-2.31818	-2.75772	-2.25084	-2.36758	-2.27263	-2.80809	-2.41229	-1.80657	-0.149987	0.0667089	-0.242866	0.352983	-2.27108	-1.53935	-1.11904	-1.82779	-1.95779	-1.44042	-1.20327	-2.61835	-0.758849	-2.63072	-0.191934	-0.175423	-0.277338	2.21689	-3.27813	-1.87331	-2.88824	-2.12402	-1.80123	-0.0498309	-2.55872	-1.25738	1.38992	5.97749e-05
PRG2	yes	no	2.13406	1.9143	0.670635	3.92778	2.31275	1.4227	1.2944	5.08674	4.16611	4.84806	0.642015	2.24852	5.59727	5.19842	0.628891	2.03162	4.72944	2.43811	4.796	3.13386	3.63071	4.63824	2.00015	3.20516	1.02968	5.19615	4.45188	4.57581	3.19931	2.84853	4.26089	1.49714	5.08188	4.78321	1.49585	0.00869656
LCP1	no	no	2.14698	1.25442	1.76456	1.31523	2.41076	0.604717	1.67922	4.55118	4.63969	4.16302	6.58981	7.08773	2.20251	1.77819	5.5182	5.198	1.23902	5.05399	5.20472	2.5112	0.493869	1.74283	1.45925	6.6226	4.66537	5.08722	1.82128	0.361511	3.39571	3.73305	3.85218	6.80335	4.38001	3.83869	2.13237	5.76951e-05
PLS3	no	no	-2.94176	-2.63235	-2.49634	-1.993	-2.66155	-0.802709	-2.6701	-0.0407409	0.253613	-0.697876	-1.50294	-1.22341	-2.10331	-2.35259	-0.866738	-1.81772	-2.4492	-2.41549	-0.859516	-2.24062	-1.17089	-1.93688	-1.82563	-2.01985	-2.62474	-1.75519	-2.29695	-1.60798	-1.44417	-0.388353	-2.10884	-1.43068	-0.660038	-1.34004	0.651975	0.0757354
APEH	yes	no	-1.31474	-1.52193	-1.64308	-1.78339	-1.53729	-1.92168	-1.48891	0.166442	0.643781	0.335104	1.00239	0.98893	-1.94561	-0.756131	0.150432	-0.595716	-1.98633	-0.694371	1.28909	-1.91424	-0.871236	-2.30487	-0.794724	0.314839	-0.264788	1.80653	-2.01195	-0.581605	-1.37148	-0.229053	-2.05531	1.45845	-0.0345002	0.513533	1.568	5.01744e-05
GYS1	no	no	-4.95738	-4.32174	-4.94209	-4.37406	-4.48915	-4.62797	-4.84036	-2.61574	-5.3828	-4.55554	-2.50627	-3.44647	-4.49912	-4.43958	-1.09374	-1.767	-4.06566	-3.55076	-4.71976	-4.18636	-3.39273	-4.28802	-3.56006	-4.27195	-3.48291	-1.97515	-4.51241	-4.09953	-3.13127	-3.18717	-3.24863	-0.964119	-4.62822	-4.24878	0.835864	0.00309869
PRKAR2A	no	no	-3.66862	-3.22059	-3.72188	-3.39957	-3.41376	-3.66564	-3.15389	-1.95438	-1.6687	-2.69788	-2.04445	-1.2404	-3.36856	-4.09182	-2.08152	-3.06135	-3.0908	-3.84514	-2.64699	-3.47877	-2.66112	-3.51054	-2.85608	-2.07479	-3.92458	-2.26242	-3.13934	-3.03181	-3.08802	-3.89768	-2.85518	-0.783889	-1.99465	-2.82309	0.72208	0.000531738
SLC5A1	no	no	-5.0329	-5.27747	-5.15705	-5.39023	-4.75796	-5.41028	-5.03511	-4.86833	-5.19743	-4.72695	-4.87839	-5.03251	-5.66372	-5.09714	-2.35811	-4.87837	-4.91113	-5.3552	-4.52807	-5.4749	-4.25186	-4.98331	-5.28466	-4.66593	-4.9523	-5.05864	-4.48535	-3.27568	-5.11249	-5.60604	-4.69232	-5.13326	-4.74467	-4.5621	0.276941	0.293093
ANXA8;ANXA8L1	no	no	-4.34635	-4.31627	-3.72184	-4.38526	-4.6912	-4.8093	-4.04843	-1.58944	-4.95707	-3.05924	-4.25975	-4.32928	-3.22437	-3.99354	-3.58308	-4.26262	-3.7415	-4.93895	-3.78421	-4.08601	-4.2078	-2.22835	-3.26606	-4.44558	-4.15741	-2.5247	-4.02217	-3.54996	-2.72928	-4.42289	-3.84859	-4.36747	-3.89899	-2.52816	0.568647	0.0139781
CD59	yes	no	9.44542	9.12641	7.22204	8.89399	6.92799	9.47498	8.78847	7.56037	7.49885	7.49895	4.85003	5.73821	8.78877	8.00882	4.25305	5.07908	8.46981	7.5676	7.902	7.27358	8.744	7.39657	7.61512	7.00715	5.48916	7.10029	7.67111	7.76582	6.55315	4.92121	7.15786	5.73894	7.72846	7.41794	-1.56175	0.0114116
SELL	yes	no	-0.427712	1.02187	0.531143	-0.227461	-0.706403	0.672802	-0.942303	3.36835	2.82352	3.71965	3.32179	3.01096	4.0705	3.10402	2.47092	2.99679	2.32511	3.0008	4.01683	1.23216	2.19448	3.45914	2.82387	1.1857	2.56082	2.94103	3.17288	2.47179	2.83343	3.00049	2.30689	2.8134	4.9674	3.64279	2.92058	6.23452e-05
MIF	yes	no	-1.44331	-3.46637	0.207016	-0.742688	-0.33701	0.638262	-1.65532	4.238	4.10074	3.24985	3.22287	4.51593	3.02131	1.47446	4.00953	3.21237	1.52066	2.56795	3.13552	1.51223	2.79962	1.9034	2.9606	2.32997	3.39133	3.90896	2.13716	2.61058	3.4404	2.90076	1.65537	4.83926	2.73871	2.72323	4.06924	0.000263044
FOLR2	no	no	-2.12695	-2.64947	-2.72847	-1.75369	-2.12395	-2.06138	-2.39275	-1.24899	1.65321	-0.36491	-1.83203	-0.997588	-0.939863	-1.14661	-2.43067	-1.81213	-1.99516	0.12851	1.75175	-0.793557	-2.20766	0.230405	-2.39579	-1.52304	-1.44532	-1.13235	0.643795	-0.351717	-1.50442	-1.86944	1.59996	-1.14799	1.4887	-0.770857	1.23245	0.00203288
CD99	no	no	-1.54153	0.901818	-0.722335	1.81915	-0.973222	0.511774	0.126883	2.43806	5.48506	4.37274	1.17429	2.54945	5.49193	5.58864	1.12424	-1.60811	-0.322828	-0.20507	5.6884	3.9767	2.86687	3.33827	1.07785	6.34474	-0.869327	4.94823	0.345029	7.73234	0.27741	0.074591	6.92241	4.41641	3.9843	4.68685	2.78515	0.000374674
PRKCSH	no	no	-2.10852	-2.11708	-1.87373	-2.43141	-1.96748	-1.28091	-1.90055	0.32223	0.264592	-0.734741	-2.64855	-1.52624	-0.527046	-0.267846	-2.03363	-1.34956	-2.16834	-1.7054	-1.0567	-2.27433	-1.43488	-0.89378	-0.766151	-0.180586	-1.66826	-1.05544	-1.27144	-0.577669	-1.49419	-1.64854	-0.939181	-1.36001	-0.0283599	-0.305449	0.94027	0.000503475
HCLS1	no	no	-2.07641	-2.34902	-2.63907	-3.19737	-2.38218	-2.48085	-2.53655	-0.145593	-0.583343	-1.11308	2.42085	0.335561	-1.40994	-2.40683	-0.307281	-0.0391061	-2.59808	-0.680221	-0.140658	-2.41087	-3.66205	-2.91606	-2.18494	2.3416	0.0513578	-0.242467	-3.17965	-2.96801	-2.96325	-3.09834	-2.29731	1.24983	-1.10362	-1.90483	1.61304	0.000741141
FDPS	no	no	-2.22198	-1.64101	-1.7132	-1.6234	-1.93732	-1.9331	-1.57912	0.187859	0.587906	0.0662038	0.889806	2.01716	-1.80048	-1.534	0.138566	-0.840847	-1.84228	0.144872	0.0129643	-1.78573	-1.55733	-1.41466	-1.55354	1.50239	-0.316667	0.348653	-1.57981	-1.65943	-1.29466	-0.55587	-2.05792	1.3384	-0.200168	-0.694156	1.17033	0.000237646
CPM	no	no	-1.23755	-0.265966	0.225327	0.327028	-1.21732	5.11059	0.587265	3.6745	2.90986	2.38981	-0.957359	1.74129	3.07631	4.1083	-2.10347	1.86096	4.61418	1.11357	3.11733	0.0174389	3.90869	3.38525	3.13953	2.37269	1.18059	2.88532	2.81849	3.27506	2.4671	1.93664	2.69425	0.854831	3.55266	2.77956	1.98586	0.0816274
COX7A2	no	no	-4.81339	-4.75349	-4.60634	-4.79474	-4.83006	-5.04709	-4.7587	-4.94369	-4.70566	-4.86956	-4.8429	-4.63353	-4.65842	-4.80231	-5.05239	-4.67671	-4.87003	-4.41936	-4.17661	-4.85424	-5.07357	-4.83502	-5.11118	-3.56321	-4.75535	-4.57994	-4.84741	-4.32507	-4.7052	-4.95751	-4.65539	-5.05423	-4.58984	-4.73418	0.0447428	0.660328
SI	no	no	#NUM!	#NUM!	#NUM!	#NUM!	#NUM!	#NUM!	#NUM!	#NUM!	#NUM!	#NUM!	#NUM!	#NUM!	#NUM!	#NUM!	0.657353	#NUM!	#NUM!	#NUM!	#NUM!	#NUM!	#NUM!	#NUM!	#NUM!	#NUM!	#NUM!	#NUM!	#NUM!	#NUM!	#NUM!	#NUM!	#NUM!	#NUM!	#NUM!	#NUM!	#N/A	#N/A
NID1	no	no	2.29948	2.06201	2.18095	1.95178	3.05479	1.14192	2.15078	5.15189	5.27101	4.35174	1.3961	3.03594	4.00116	5.22706	2.40868	3.58424	2.34707	3.31738	4.76021	4.04019	3.05288	4.57826	3.76594	3.63552	3.2491	4.581	4.25351	4.52674	4.11715	3.30963	4.95533	3.35387	4.57791	3.67779	1.74423	1.22502e-05
AKR1A1	no	no	-2.02861	-1.83661	-1.76391	-2.01494	-2.40851	-2.77105	-2.03307	-0.803422	0.461308	-0.438425	-0.757725	-0.56984	-1.73571	-1.99661	-0.357557	-1.34276	-2.33232	-1.18018	-0.484876	-1.02632	-1.69595	-1.74782	-0.987891	-2.22888	-0.882983	-0.0789965	-1.7137	-0.363032	-1.25498	-0.608197	-1.21189	-0.278077	-0.99632	-2.08078	1.12271	0.00118514
PLA2G2A	no	yes	-4.20228	-4.59402	-4.07371	-4.37181	-3.93224	-3.81477	-4.97463	-4.00656	-3.20555	-4.87056	-3.57214	-4.3504	-3.57889	-4.08378	-0.833696	-2.94254	-3.88166	-4.12551	-4.79187	-4.40111	-4.22272	-4.85725	-3.46617	-5.11269	-4.74892	-4.05732	-3.99936	-3.48042	-4.1434	-4.48208	-4.61085	-3.19848	-4.4267	-3.63037	0.324538	0.241966
NCF1	no	no	-3.70384	-3.60799	-3.42969	-3.38591	-3.81239	-3.28377	-4.01046	-2.39372	-2.07202	-3.63301	-2.70919	-1.85465	-2.79309	-3.136	0.694934	0.0479272	-4.03596	-2.49425	-4.11202	-2.92951	-3.33464	-3.84034	-3.56705	-0.380816	-2.10394	-3.27008	-3.55821	-3.57658	-2.47068	-1.77551	-2.71242	-0.365141	-4.43219	-3.48805	0.985721	0.00161274
PKM	yes	no	2.27856	1.53772	2.06831	1.49783	1.51826	1.08048	1.74401	5.16684	5.77325	4.72521	5.96013	6.45117	2.25667	0.981988	4.87024	4.86937	0.453211	4.85677	5.93264	3.13577	1.63439	2.77273	3.08642	3.9621	4.27382	4.73061	1.60457	2.31992	3.01984	4.1514	3.1796	6.38128	3.78705	3.74046	2.41125	1.10902e-05
HSP90B1	no	no	-1.33348	-1.69461	-1.97164	-1.39912	-1.51481	-1.91214	-1.37782	1.06069	0.511586	-0.119242	-0.51571	-0.935569	-1.08411	-1.74563	0.416362	0.451169	-1.89086	-1.41444	-1.47382	-1.5917	-1.98686	-0.140059	-0.518426	-0.222087	-0.875969	0.29991	-1.3256	-0.92653	-0.332724	0.653438	-0.339493	0.184872	-0.295737	-1.25476	1.19965	0.00017375
MMP9	yes	no	-1.02894	-1.61062	-1.47437	-0.387931	-1.01442	0.937598	-1.75041	1.55662	0.541933	2.50642	3.72997	6.87964	0.0291822	0.426353	2.66809	3.87386	-1.60008	0.450506	2.1539	-0.856791	-2.20088	1.01569	-0.0150373	2.25154	4.3872	2.79723	0.523657	-1.35557	3.58088	2.98424	2.14219	4.99603	-0.726727	0.747666	2.5143	0.000397703
IL2RB	no	no	-2.71362	-3.05259	-3.14206	-3.1886	-2.76644	-1.90091	-3.30197	-0.181745	0.218416	-1.77937	-2.9713	-2.50696	1.68585	1.00001	-2.84661	-2.91405	0.219354	-2.85734	0.642198	-1.33115	-1.21578	-1.4404	-1.57726	-3.25479	-3.12096	-1.57068	-1.03481	1.34506	-1.26367	-2.79723	-1.23887	-2.57349	0.0142405	-1.59451	1.43186	0.000455823
COX6B1	no	no	-3.35256	-4.0488	-3.84344	-2.97175	-2.91071	-3.81642	-4.09941	-1.30088	-1.44288	-1.07041	-1.97352	-2.64759	-0.957431	-2.18698	-0.58646	-2.66206	-3.42752	-2.53669	0.773162	-3.04622	-3.20235	-4.17959	-3.76411	0.366179	-3.32519	-0.684001	-2.98403	-0.786816	-3.28581	-2.39339	-4.75261	-1.5958	-1.22816	0.183367	1.63232	0.000200819
HNRNPL	no	no	-4.08848	-4.22818	-4.20055	-3.38594	-4.62156	-4.40168	-4.29654	-2.32111	-3.14545	-3.03594	-3.2753	-2.89524	-3.75894	-4.31466	-1.73107	-3.46421	-4.47359	-4.16387	-3.84455	-4.40454	-3.28323	-3.83378	-4.42559	-0.50381	-4.12826	-2.09166	-4.1211	-3.06348	-4.24926	-3.59645	-3.41566	-2.57818	-4.39449	-4.23107	0.778352	0.00586217
JUP	yes	no	-3.89832	-3.74541	-3.9907	-2.42306	-3.57244	-3.36584	-3.39747	-1.47965	-3.53461	-3.7715	-3.74545	-4.2614	-2.08798	-2.83974	-2.1144	-4.36559	-1.58328	-2.08218	-4.05527	-3.93198	-2.28333	-2.91801	-3.5199	-4.13415	-3.61127	-3.44248	-3.91772	-3.8475	-3.52109	-3.95955	-4.05504	-3.79412	-3.60298	-4.15574	0.20357	0.527846
LIF	no	no	-2.35121	-2.5683	-2.56482	-2.66655	-2.16538	-2.97893	-1.79595	-1.98251	-1.53019	0.590529	0.256024	-1.23921	-1.18507	-1.05339	-2.93624	-1.42273	0.565552	-3.04391	-1.46211	3.15218	-2.70386	2.04048	-0.599701	4.40982	-0.168892	-1.68366	-1.57565	0.588891	-0.922972	-2.04947	-0.477263	-1.92615	0.568354	-1.1848	1.90898	0.000153899
FABP4	no	no	-2.37064	-2.72617	-2.30497	-2.34314	-2.82246	-3.19	-3.3935	2.53495	0.982239	0.110468	-2.02033	0.930143	-1.85631	-4.40614	-1.35781	-0.487957	-0.026749	0.550604	0.376132	-1.65498	-3.19113	-1.42327	-1.4785	-0.216634	-1.67367	-0.750888	-3.23208	1.76137	-2.47908	-1.51551	-0.931194	1.43377	-1.02765	1.11472	1.81673	0.000107303
GLUL	no	no	-3.28726	-3.30006	-3.45882	-1.77224	-3.92434	0.585257	-3.57044	-3.35512	0.514595	-1.56631	-1.94941	-1.94628	-1.9263	-2.96719	-2.26931	-1.91584	-3.74202	-3.84969	-3.09561	-2.99807	-2.05052	-2.53651	-1.21373	-3.33625	-2.64561	-4.26351	-3.2547	-3.59725	-3.36664	-0.87905	-0.91803	-2.36359	-3.4066	-2.09666	0.264316	0.753212
AKR1B1	no	no	-3.1045	-2.80188	-2.6419	-3.14017	-1.79485	-2.46767	-2.7263	0.165706	1.79698	-0.166944	-1.50117	0.114999	-3.07826	0.133407	-1.8935	-0.728398	-1.49717	-2.3132	-1.24899	-2.43392	-2.45989	-1.51508	0.887997	-1.58511	-2.09305	-0.0415629	-1.96429	0.410978	0.23431	-1.34174	-2.05182	-1.76555	-1.00124	-1.20022	1.80156	1.63486e-05
ANPEP	yes	no	-1.2193	-0.0520917	-0.377943	-1.10306	0.574221	-2.14018	-1.64514	3.51056	4.34012	3.65568	0.00517323	4.32083	3.42993	4.16951	3.36898	1.70466	-1.06069	2.25754	4.61733	2.05514	2.70009	3.30001	2.59996	2.17701	1.24072	2.40585	3.49103	5.10834	2.51718	2.22756	3.77319	2.45594	5.03554	2.63257	4.18212	2.44659e-09
PVR	no	no	-2.95538	-1.40979	-0.887843	0.206885	-2.27043	-1.12744	-0.954024	3.79535	3.15272	2.88248	0.377354	1.5048	3.62471	3.81732	0.612937	1.54212	3.72854	2.1383	3.07823	0.300344	2.4566	2.29602	3.47115	1.5215	1.32318	2.37151	2.5192	2.52838	1.83305	0.996462	2.11266	-0.112363	4.06795	2.61913	3.59728	5.16772e-05
RAC2	no	no	-2.82211	-2.85238	-2.31562	-2.67507	-2.57387	-2.66082	-3.12937	0.66694	-1.99865	-0.733807	2.92699	0.533246	-1.03571	-3.85674	0.554323	0.174708	-3.38394	2.71826	-1.79767	-0.0429243	-2.20945	-2.76513	-2.28941	-0.550886	0.929276	-0.647872	-1.58474	-2.22508	-1.31398	0.258546	-1.12719	2.23278	-1.63461	-1.81266	2.22524	1.22502e-05
CPN1	no	no	-1.29383	-1.58086	-1.79013	-1.44587	-0.961291	-2.24181	-1.75678	1.23615	1.03908	3.30946	2.24129	1.95724	-1.82744	0.734989	3.78788	4.22549	-1.81881	-1.39847	-1.38239	-2.07709	-1.8824	0.908564	2.17404	-1.39091	2.60673	2.4278	0.19268	-2.42732	2.63146	3.4705	0.0193613	1.31462	0.673018	-0.40947	2.79774	6.31724e-06
IFNGR1	no	no	-2.77112	-2.88203	-2.80316	-2.29259	-2.56067	-2.87621	-3.22157	-1.36091	0.0137106	-2.05327	-2.04834	-0.705918	-0.976188	0.607689	-2.27301	-2.36071	-2.6006	-2.45354	-2.61665	-2.32849	-2.46771	-0.998072	-2.1045	-0.646369	-2.09678	-0.435025	-0.673497	-0.971566	-2.26347	-2.93677	-2.04946	-1.45301	-3.63189	-2.34579	0.472871	0.0679285
ARSA	yes	no	-1.27614	-2.1571	-0.119094	-1.09075	-0.736945	0.991993	-0.707121	2.6801	4.00426	3.78426	0.0731877	2.93807	2.65454	4.2071	0.709536	1.24195	2.89472	-1.45712	4.90017	0.250387	3.2771	-2.04278	1.53958	2.13104	1.98631	2.71386	1.64028	4.69993	1.85481	2.54881	3.76359	0.690665	4.59598	1.52815	2.85428	1.62809e-05
B4GALT1	yes	no	-1.88716	-2.57589	-1.22944	-1.93999	-2.38399	-4.41933	-2.3604	0.390395	0.6913	1.06772	-1.65633	0.596561	-0.749906	0.367281	0.0233823	1.0514	-1.66875	-1.19923	1.34108	-2.94575	-0.477853	-0.0593944	0.520814	-3.19055	-0.223295	1.45856	-1.19445	0.275846	0.766912	0.416154	1.0505	0.228979	0.931502	-0.179974	2.28725	0.000520694
ACP3	yes	no	0.992221	0.164065	-0.619557	-0.0317993	-0.855538	-1.58737	-0.770196	2.32777	2.82771	3.2928	-0.622939	3.36782	1.96892	4.90611	-0.470137	4.21024	-1.04161	0.478072	3.04389	0.258949	2.10677	1.71535	4.02022	2.56522	1.8506	2.57686	2.1515	2.12761	2.85426	2.81197	3.57862	2.72218	3.01278	1.36983	2.46427	6.6522e-05
EZR	no	no	-1.45103	-1.56043	-1.92864	0.0757884	-0.353709	1.73728	-0.835413	2.64157	2.7106	2.08169	1.39491	1.70133	1.98927	1.21297	1.80146	1.18071	2.16562	1.60436	1.65557	0.514835	2.30215	0.986369	1.58594	2.6099	1.45093	1.78253	1.17053	1.99969	0.761098	1.1617	0.616464	2.18101	2.2132	1.87246	2.31138	0.00482651
ATP6V1B1	no	no	-3.61535	-3.69171	-3.22584	-3.25005	-3.50277	-2.84298	-3.5679	-3.9146	-2.9669	-3.2739	-3.5748	-2.81511	-2.76089	-3.44721	-2.33501	-2.33343	-3.306	-3.72364	-2.07402	-3.63218	-2.8559	-2.16475	-3.3786	-3.5189	-2.34775	-2.78472	-3.48967	-1.78677	-2.88281	-2.33298	-3.08405	-2.24886	-3.26174	-3.08021	0.436176	0.0163325
FOLR1	no	no	0.440427	-2.46224	-0.381652	1.76307	-0.625567	0.804066	-1.68066	4.49714	3.895	2.67456	1.13092	2.48467	4.77202	4.83457	-0.740856	1.86995	2.96885	3.27374	2.80982	1.69989	4.42573	2.99957	3.69363	2.81711	2.37618	1.71084	3.82508	2.84461	3.10625	2.6531	2.87542	1.85591	4.08453	3.71245	3.15148	0.00170699
UCHL3	no	no	-2.59406	-2.939	-2.92769	-2.83321	-2.76415	-2.73561	-2.61637	-0.905733	-1.24774	-2.36504	-2.96459	-2.92029	-2.26545	-2.75571	-0.990663	-1.32938	-2.91736	-0.910486	-2.61634	-0.637979	-1.98922	-2.19151	-3.13418	-3.24882	-2.21914	-1.12701	-2.7014	-1.20439	-2.27303	-1.21169	-2.34861	-0.38409	-2.84954	-1.94253	0.855261	0.00116746
HPGD	no	no	-2.04135	-1.82681	-2.58136	-2.78172	-1.71388	-4.04718	-2.10254	3.14899	1.03819	-1.11636	-1.90519	-0.513184	-0.398948	-1.15322	0.702137	-2.11471	-1.38493	0.657858	2.2243	-1.26802	-2.18926	-0.279196	-0.170189	1.48576	0.526869	1.28289	1.80662	1.72063	-0.232318	-0.974667	-2.5702	2.69254	1.20815	1.40984	2.72488	1.91312e-05
CD46	no	no	0.832068	0.736991	-2.49706	-0.498297	-1.8952	0.546361	-1.14608	0.812855	2.45439	1.14755	-0.339945	1.1899	1.75548	1.9197	-0.306157	-0.483812	-0.00432883	-0.0223924	2.02208	1.26905	1.509	1.96492	0.219528	1.58223	-1.16674	0.866491	2.44217	2.01671	0.0553975	-1.11491	2.11113	1.26814	1.79035	1.11864	1.52552	0.0369285
NME1	no	no	-2.51949	-2.78623	-3.09694	-2.86059	-2.28666	-3.10787	-2.95138	0.646483	-0.602681	-1.76971	-0.491821	0.590687	-2.97597	-3.45512	-0.289429	-0.10612	-2.19784	-2.46067	-0.621331	-2.72868	-2.44872	-2.82703	-1.58244	-1.03629	-1.60606	0.794844	-2.82081	-2.11309	-2.00041	-0.926864	-2.20061	-0.0307544	-1.87059	-1.68619	1.03166	0.00185309
GNS	yes	no	1.6667	2.4568	1.93921	1.82967	1.20173	-0.391088	2.11712	4.09675	5.6661	5.71334	1.74488	6.05187	3.19174	6.4151	1.87979	1.65911	0.369668	3.01821	6.2423	4.17486	3.81935	4.37582	3.49015	5.52012	2.52199	5.68298	3.7523	6.81504	3.37848	2.48883	6.0461	3.9286	5.5898	3.48847	2.81005	7.64129e-05
IGLL1	no	no	-0.0850571	0.314721	0.16063	0.798473	0.0494039	-1.94183	0.138053	2.04782	4.53156	3.2832	0.336835	1.37854	0.854396	2.60549	2.40433	2.28126	-0.474607	1.80526	2.59445	1.47617	1.59459	1.88626	2.34719	1.74005	1.8538	3.46317	-1.00046	1.89091	1.42393	3.77175	4.58386	1.16664	3.71568	3.37012	2.50324	2.44579e-05
ARSB	yes	no	-3.25443	-3.32045	-1.98662	-3.60586	-2.90534	-3.65513	-3.07055	-2.97126	-0.0412911	0.176112	-4.37654	1.09396	-0.744771	1.12506	-3.81353	-1.5914	0.707468	-3.20229	-0.683954	-3.3801	-1.97881	-0.15694	-1.98514	-0.740732	-1.39018	0.014665	0.578511	-0.317024	-2.78052	-3.71605	-0.310623	-1.58562	-1.84175	-4.77597	1.6257	0.000488591
RPS2	no	no	-2.96641	-4.21516	-4.43009	-4.32758	-3.96297	-0.0311131	-3.20761	-2.62123	-1.5749	-3.0194	-1.157	-2.11019	-3.337	-2.00594	-1.97239	-4.2065	-3.31215	-3.02454	-2.24273	-2.35398	-4.08689	-3.7013	-3.43535	0.241992	-3.84982	-2.55174	-3.73609	-5.09657	-3.54746	-3.39318	-4.19349	-0.425237	-3.53451	-4.26343	0.312829	0.6774
ST6GAL1	no	no	-4.18377	-3.78644	-4.00466	-3.99301	-3.89064	-3.68591	-3.61188	-3.53414	-3.25525	-2.55335	-4.09906	-3.81831	-4.15141	-3.19349	-4.28187	-3.97633	-4.0872	-3.83632	-4.28941	-4.32787	-3.51544	-3.70642	-4.19858	-2.03284	-3.92969	-3.44947	-3.93823	-3.39928	-3.57215	-4.06404	-3.7533	-3.68845	-2.92898	-2.59535	0.373516	0.00776503
DSP	yes	no	-2.07861	-2.19607	-2.50716	-0.0951409	-2.32558	-0.171128	-2.18041	-1.31275	-1.76228	-2.48805	-2.6659	-2.49357	-1.51847	-1.38111	-2.20727	-2.36217	-1.6956	-1.45088	-2.77767	-2.28003	-1.76783	-0.515706	-2.23129	-2.18251	-2.5243	-0.328443	-1.82528	-1.76348	-2.6522	-1.39738	-2.29013	-2.24235	-3.00989	-2.43385	-0.332022	0.53081
MUC1	no	no	1.66933	1.54022	0.838935	3.34273	-0.387414	5.34222	2.09992	5.47666	4.45503	3.22839	0.630347	3.22244	4.94225	4.5245	0.708041	2.27622	5.90138	4.28504	4.48478	2.49034	6.33079	3.09983	4.99842	4.34581	2.97302	3.0679	4.18904	5.38146	3.72393	2.59007	4.04149	2.75698	5.14684	3.72624	1.75101	0.0703993
COX7C	no	no	-1.86671	-1.88663	-1.85186	-1.6769	-1.83604	-1.65559	-1.98341	-1.72477	-1.8674	-1.69551	-2.17985	-1.49327	-1.69812	-1.94374	-1.5881	-1.8048	-1.86638	-1.736	-1.61007	-1.78042	-1.82296	-1.75973	-1.70789	-0.617977	-1.90566	-2.03358	-1.45389	-1.41133	-1.87066	-1.69508	-1.74976	-2.0915	-1.98674	-1.92594	-0.0765328	0.430294
TIMP2	yes	no	-0.675059	-0.744063	-0.883697	0.786335	-1.6032	-1.22342	-0.644064	0.204645	-0.514245	0.619847	0.635426	1.99948	2.07584	1.17454	-0.552296	0.483677	1.08448	-0.00769111	-0.145573	-1.24914	-0.0712833	0.686315	0.546924	1.85504	0.160168	0.535902	0.802922	-0.432065	0.401049	0.349087	-0.95197	0.220298	1.9053	0.359431	1.19185	0.00852146
NPR1	no	no	-3.25974	-3.36954	-3.42904	-3.49569	-3.48564	-3.80397	-3.26579	-0.355402	-1.86375	-3.44086	-2.99574	-3.54386	-2.76567	-0.536731	-3.45644	-3.9108	-2.70092	-1.38535	-1.92007	-4.26969	-4.12131	-3.22697	-1.12447	-3.35877	-3.08707	-2.47662	-0.817645	-0.810508	-1.48249	-3.89959	-1.53347	-3.96619	-3.48737	-3.835	1.1203	0.000443449
CD44	yes	no	9.28805	9.36066	7.9435	9.94838	8.00857	10.6532	8.63015	8.68097	6.99507	7.12022	4.66367	5.77627	9.5994	8.38685	4.66148	6.67276	10.083	7.1989	8.23736	6.33671	8.84148	7.2247	8.44329	6.17971	6.47149	7.1959	8.58326	8.16738	7.68148	6.59327	6.92277	5.42631	8.39045	7.71206	-1.77647	0.00439223
NQO2	no	no	-2.15762	-2.47373	-2.08203	-2.15481	-1.97852	-2.77567	-2.61083	-1.79974	-0.77082	-0.814744	1.4629	1.71175	-2.84104	-0.352511	-0.893476	-0.689196	-3.18193	-1.39753	0.813365	-1.92588	-3.83447	-2.43243	-2.4574	1.04337	-0.99872	0.375856	-2.07913	0.68968	-1.60884	0.0368152	-0.91027	1.07086	-0.365669	-0.779886	1.67213	5.76951e-05
SELP	no	no	-3.64401	-1.00941	-2.28088	-1.46076	-2.77327	-2.6778	-2.43097	-2.13352	-3.96218	-2.9192	-3.38753	-3.72855	-2.25488	-3.06041	-3.59348	-3.78003	-1.60778	-3.58405	-2.89916	-3.12764	-2.08516	-3.42532	-3.23686	-2.45069	-3.81413	-2.82449	-2.9971	-1.44423	-3.85776	-3.84326	-4.08971	-3.26675	-2.1312	-3.35329	-0.720128	0.117176
ACAN	no	no	-1.50261	-0.523727	-3.35091	-0.118872	-3.04041	1.76815	0.333017	0.0615429	-0.0250583	-0.543819	-2.6422	-2.60879	1.41223	0.251332	-2.80957	-1.27677	3.22775	-1.70961	0.0775805	-0.242536	1.83204	-0.816343	-0.17205	-2.04245	-2.1455	-2.02609	-0.0930188	-0.642647	-1.20249	-1.30723	-0.0581724	-2.22318	0.352271	-0.911018	0.257224	0.785421
ITGB4	no	no	-0.135064	-0.946568	-2.34096	-0.132506	-1.72686	-1.36855	-1.53979	-2.42972	-0.36881	-0.126713	-1.95743	-1.6125	-0.769533	0.0167293	-1.82914	-1.38247	-1.97523	-1.62132	-2.06504	-1.27	-0.181462	-1.37747	-2.31211	-0.837623	-1.60292	-1.54155	-1.69821	-1.59694	-2.16362	-1.30277	-1.42104	-2.08008	-0.753054	-1.20987	-0.351652	0.328341
SPN	no	no	-4.63818	-4.52966	-4.1101	-4.37537	-3.98024	-3.94594	-2.68945	-4.04408	-3.1056	-3.92018	-2.55588	-1.43477	-3.45593	-1.53927	-5.22508	-4.01095	-3.20268	-1.35789	-3.80546	-4.85141	-4.43643	-3.97406	-4.43151	1.42258	-3.77157	-4.4616	-4.79333	1.22234	-4.54691	-4.63098	-3.91735	-1.48483	-3.05817	-4.62707	1.40346	0.00276356
CBR1	no	no	-2.70786	-3.91495	-3.32826	-3.85536	-4.00546	-2.81942	-3.60533	-1.43639	-0.699634	-1.45226	-3.25768	-2.24011	-2.94857	-3.30781	0.0728525	-1.43925	-4.19674	-2.7212	-1.72559	-4.50133	-0.882254	-2.74326	-1.99323	-2.34845	-2.59568	-2.12946	-3.25809	-2.07652	-1.36089	-1.89571	-3.18938	-2.38484	-1.87437	-2.60065	1.39118	0.000121739
ANK1	no	no	-5.58684	-5.63139	-5.20444	-5.46097	-4.21138	-5.2202	-5.572	-5.49661	-4.74746	-4.25157	-5.64398	-5.62983	-5.77523	-5.51223	-5.85452	-5.50982	-5.20071	-4.95123	-6.06525	-5.2205	-4.89758	-5.60154	-5.86953	-5.82308	-5.22378	-2.37082	-5.25414	-5.17178	-5.62272	-5.04282	-5.66818	-5.02952	-5.57055	-5.33547	0.228309	0.253337
CREB1	no	no	-3.25771	-3.72782	-3.88124	-3.41825	-3.10762	-3.58618	-3.91417	-2.79004	-2.02258	-2.37985	-0.345295	-3.55422	-4.49818	-4.1267	-3.67419	-2.0523	-3.59493	-3.61463	-1.43433	-3.07299	-3.57567	-3.80468	-3.24371	-1.33086	-3.96261	-3.58096	-3.37408	-3.3086	-3.9217	-3.79595	-3.20404	-0.967481	-2.23018	-1.81145	0.700382	0.00984986
GLB1	yes	no	-0.127401	0.198288	-0.471394	-1.12234	-0.237678	-1.2342	0.0425985	3.23553	3.80756	4.49897	-1.10556	4.1837	2.5426	4.63813	0.464136	2.39337	1.04353	0.430814	4.60694	0.44924	2.60405	2.36174	3.97027	3.70419	2.72655	3.50313	2.55753	5.51974	2.30723	2.66566	4.30675	2.29954	3.81755	1.07527	3.16218	1.95906e-06
PECAM1	yes	no	1.86198	1.47162	0.567299	3.88272	1.27521	3.11854	0.369596	2.26525	1.89071	1.98968	-0.080968	2.08858	3.09107	2.67465	-2.37732	0.752933	3.53668	1.14772	2.46636	1.8249	3.36229	1.64388	1.94299	2.20894	-0.238953	1.90216	1.76146	2.81612	2.22721	0.278408	2.05051	0.516735	2.71768	1.72389	-0.00161613	0.998181
H1-5	no	no	2.03371	2.44243	1.98709	5.27831	1.01345	4.71529	3.53174	4.9311	4.31368	4.73499	1.55422	4.68921	3.7808	3.15481	3.81281	5.26907	0.735287	1.8169	3.07886	4.11806	5.59777	3.06087	1.58743	6.86886	3.9989	4.23744	3.10542	2.37094	1.76712	2.98986	2.87881	5.9934	4.07063	5.7504	0.922709	0.291126
H1-3	no	no	-2.27148	-2.6107	-2.81555	0.661715	-2.23745	1.29575	-3.23692	2.66035	-2.25467	-4.01769	-3.34968	-3.12058	-0.525474	-1.46301	0.667969	0.440589	-2.04859	-0.32199	0.324855	-0.251688	-0.697374	-2.91375	-1.49371	4.87761	0.238524	1.04997	-0.543657	2.15093	-1.6627	-0.618566	-2.51634	1.09273	-3.35896	-2.73129	0.917833	0.339193
H1-2	no	no	2.3576	4.11432	1.54066	2.96735	1.73391	3.6122	3.92916	3.85509	2.92925	0.87188	2.9996	2.68287	2.5821	2.72547	1.51763	0.925946	5.15855	3.39674	3.61138	2.53717	3.17561	1.13111	0.176096	6.74174	0.800159	3.01578	2.05885	4.82683	-0.762868	3.79425	1.11989	4.79137	3.69566	1.7214	-0.223986	0.720573
EPCAM	no	no	-2.47502	-2.33166	-1.60502	-1.36183	-2.2891	-0.718067	-2.15884	-0.185284	-0.593559	-0.165311	-3.06825	-0.987991	-0.515024	-0.452796	-0.877703	-1.98956	-1.09609	-2.3231	-0.953581	-0.182598	-0.341268	-0.527442	-0.526132	0.265704	-2.25443	-1.01593	-0.587173	0.213014	-1.0136	-3.12919	-1.27654	-1.23757	0.065842	-0.397629	1.02304	0.0104719
DPEP1	no	no	-2.49001	-2.65203	-1.77747	-3.05939	-3.18902	-2.25848	-2.25614	0.824647	1.1362	0.720276	-3.10484	-1.019	0.202971	-0.0705628	-0.490428	-1.12983	-1.94777	-2.69482	1.16346	-2.25835	-1.23105	-1.53579	-0.487129	-1.61063	-1.40847	-1.89125	-1.62717	-0.334154	-0.433639	-1.92161	0.50201	-2.48322	-0.775831	-2.39338	1.76263	7.92481e-06
SELE	no	no	-2.88053	-4.15279	-2.3906	-2.95311	-3.62832	-3.11599	-3.22364	-2.11325	-2.61999	-1.57699	-2.47623	-3.17473	-3.45649	-3.1827	-2.29261	-2.6413	-4.28596	-3.77527	-0.908462	-3.98263	-2.88305	-3.64542	-3.44415	-3.03147	-3.51822	1.32942	-3.62542	-1.01896	-3.73767	-3.04848	-2.72581	-2.99089	-0.375234	-3.46686	0.500277	0.0903552
CPE	no	no	-1.9686	-1.60643	-1.4298	-2.65651	-1.41933	-1.97085	-1.42774	1.34625	2.42014	2.15191	-1.4838	1.00494	0.933425	3.40146	-2.32931	0.0765769	1.34208	0.216047	1.16016	-2.47843	-0.34322	0.507143	2.23313	-0.224857	-0.197592	0.808076	0.885516	1.78579	1.07086	0.160003	0.905605	-1.40526	-0.161479	-0.771889	2.14012	1.22502e-05
PLCG2	no	no	-4.06208	-4.56494	-4.44688	-4.41369	-4.14478	-2.08122	-4.04715	-3.21984	-3.77606	-4.38917	-4.82167	-2.48133	-3.31503	-4.21814	-3.10303	-1.6994	-2.86016	-4.1055	-4.3959	-4.12867	-2.58246	-4.47038	-4.27869	-3.84495	-4.46698	-4.24711	-4.02108	-3.48643	-4.28957	-4.52485	-3.67956	-0.208444	-4.4098	-4.64638	0.225941	0.610783
FAH	no	no	-2.40245	-1.79144	-2.37076	-2.15082	-2.17466	-2.29309	-3.01372	-2.34387	0.558972	0.47221	-0.260804	1.80309	-1.62897	-2.5805	-0.0442547	-0.347351	-2.36589	-1.82708	-0.602735	-3.14599	-1.80464	-2.16486	-1.36305	1.45865	-0.908866	1.18254	-2.05235	-1.07679	-1.72689	-0.590589	-1.02328	0.273707	0.655568	-2.03094	2.03758	2.13729e-06
STMN1	no	no	-2.21432	-1.65109	-2.10339	-0.533371	-1.24979	-1.59403	-2.0224	1.09312	0.684282	0.387804	2.88281	2.65547	-0.000682379	-1.41603	0.905428	0.71096	-1.9957	3.12646	0.927773	0.342393	-1.73156	-0.637889	-1.56557	4.20396	1.13891	1.84097	-1.4782	-2.19351	-0.966787	-0.234913	-0.338363	3.14005	1.85308	2.08389	1.92645	9.44514e-05
YBX3	no	no	-4.23291	-4.83179	-4.7131	-2.63879	-4.65149	-2.94476	-4.70889	-4.12537	-3.69982	-3.6041	-5.34695	-4.66407	-5.06836	-4.78486	-5.24571	-4.88569	-5.47828	-5.02104	-5.13384	-2.30212	-4.97563	-3.69693	-4.97425	-3.57182	-4.92405	-4.93375	-4.96222	-4.86854	-4.96265	-4.86385	-5.08818	-5.0084	-4.70074	-3.91037	-0.249215	0.639453
NAGA	no	no	-0.738529	-0.939477	-0.646965	-0.909642	-0.996873	-0.644109	-0.934985	1.45789	3.0103	2.3698	-1.01723	3.24989	0.349197	3.85584	-0.770015	-0.784178	-0.329543	0.147398	4.60166	0.217657	-0.930939	1.2719	0.0100224	1.37888	0.554903	3.10798	0.779766	4.59274	0.922727	0.0332835	2.69603	0.498576	2.35062	-0.113798	2.27203	7.32814e-06
HSPA6	yes	no	-0.273236	-2.56483	0.868833	-0.568577	1.49253	1.67619	-0.0155294	4.12341	5.0266	4.33566	5.68729	4.73306	2.33562	2.1094	4.33582	4.61745	1.39687	3.83606	4.7289	2.95793	2.39635	2.44479	2.81136	2.56628	3.98895	4.46225	2.05138	3.12477	2.20597	2.93666	2.44461	5.54208	4.09638	3.52761	3.80042	0.000181848
HMGA1	no	no	-4.77646	-4.32414	-4.46312	-4.41216	-4.71911	-5.33556	-4.79985	-4.19429	-3.06366	-4.0852	-4.96843	-2.60702	-5.02239	-4.87808	-5.12407	-4.60182	-4.74192	-4.98605	-4.29395	-4.7188	-4.20479	-4.98293	-4.77257	-2.48015	-4.3202	-4.8967	-4.78216	-4.6024	-4.68959	-4.58276	-4.53373	-2.50606	-4.89546	-4.92731	0.526585	0.00819106
GOT1	no	no	-2.95686	-2.02261	-2.47845	-2.62703	-2.93722	-1.43653	-2.62845	-0.404482	0.375496	0.242873	-1.44844	0.852964	-2.02947	-1.97511	-1.36662	-1.14525	-3.63721	-1.79453	-0.577757	-2.13139	-1.19322	-1.62756	-1.06815	0.205242	-1.30537	-0.0714127	-2.08655	-0.104789	-1.80589	-1.26757	-2.69738	-0.0290196	-0.0203716	-0.970714	1.23902	0.000332207
IFNAR1	no	no	-4.69482	-2.145	-4.21938	-4.94317	-4.0248	-3.13127	-4.32496	-3.06576	-2.32242	-4.42249	-4.06152	-4.63377	-2.26881	-2.59799	-3.7923	-3.61531	-2.18534	-1.22327	-2.43893	-4.00612	-3.04475	-3.21307	-3.17	-2.84908	-4.50722	-3.45493	-4.27004	-1.18695	-4.00864	-4.1349	-2.80882	-2.38379	-2.24714	-3.51434	0.596324	0.206244
BPI	yes	yes	-4.09446	-3.4427	-3.75519	-3.84073	-3.80843	-2.16887	-4.00698	-2.19412	-1.19636	-2.76124	-0.409594	4.78496	-2.63939	-3.44844	2.1498	2.02325	-3.24787	-2.58487	-0.868111	-2.61357	-3.45944	-2.33393	-3.16869	0.738325	1.39458	1.68414	-3.5373	-3.58636	-0.891132	-0.0953095	-0.152788	1.69779	-3.37277	-3.56679	2.91919	2.5589e-05
NPR3	no	no	-4.25642	-4.49031	-4.22624	-4.14841	-4.23106	-4.31122	-4.1388	-4.17109	-2.12811	-3.13431	-4.0893	-4.29318	-3.34983	-3.43893	-4.3107	-4.21817	-3.47738	-4.10167	-3.65276	-4.2443	-3.42272	-4.05798	-2.44175	-4.37042	-4.29072	-3.51607	-3.55926	-3.34414	-4.05424	-4.28808	-3.36574	-4.20551	-3.42211	-4.29531	0.520626	0.00209876
SMPD1	no	no	-2.61335	-2.9704	-2.57674	-2.48385	-2.60733	-3.55874	-3.22319	-2.80133	-0.0864095	-0.952643	-2.73343	0.0691092	-2.30241	-0.505867	-2.49564	-3.16396	-2.57768	-2.64111	-0.340855	-2.82969	-1.86038	-1.53974	-0.945353	-2.12778	1.76584	0.102411	-1.96437	1.15457	-2.47452	-1.99956	0.544778	-1.5939	-1.33282	-2.52186	1.45008	0.000274905
PRKACA	no	no	-5.78366	-5.20783	-4.69471	-5.43988	-5.01557	-4.44499	-5.73427	-3.37308	-4.82991	-5.13253	-2.2315	-4.38581	-5.65164	-5.12774	-3.20016	-3.55038	-4.85407	-5.1422	-2.65546	-5.13031	-5.05731	-5.44615	-4.86133	-5.8581	-3.5372	-5.01688	-5.17731	-4.17466	-5.44835	-3.41689	-4.95559	-1.20201	-4.26085	-4.0279	0.81468	0.00312231
TYRP1	no	no	-4.20498	-4.7926	-3.81538	-3.35957	-5.00246	-4.17877	-4.44433	-3.07481	-4.16228	-4.93813	-4.44504	-4.69509	-1.47974	-3.1291	-4.56296	-4.32154	-2.29176	-4.34819	-4.68743	-4.68724	-3.11515	-4.77351	-4.45644	-4.17142	-4.47274	-4.50934	-3.97063	-3.0318	-4.08892	-3.90814	-4.31038	-4.46013	-4.34308	-4.27114	0.159518	0.563475
CAPN2	no	no	-3.36154	-4.21271	-3.93259	-3.63724	-4.31767	-3.84027	-4.00208	-1.86132	-1.28583	-2.68385	-1.76402	-2.63524	-4.40216	-3.77622	-2.22977	-4.42425	-4.05652	-4.32405	-3.18327	-4.70095	-4.23595	-4.06922	-3.08414	-3.92968	-3.7399	-3.74875	-4.03777	-3.16146	-4.08717	-3.80229	-3.17001	-2.98078	-3.75629	-0.462495	0.929514	0.0010243
GAP43	no	no	-4.97584	-4.75439	-5.33622	-4.89043	-4.71723	-5.18313	-5.23553	-5.319	-3.65276	-5.14796	-5.04554	-5.01757	-5.55436	-5.38518	-5.45222	-5.50948	-1.42983	-5.64852	-5.37802	-4.41713	-5.47911	-5.03901	-5.61176	-4.95076	-5.25288	-4.15846	-4.48183	-4.07779	-5.4434	-5.3662	-4.03044	-5.31128	-5.37957	-4.02293	0.485821	0.0289112
ENG	no	no	-1.90782	-1.91877	-1.34773	-2.25617	-1.8085	-1.94869	-1.35979	1.06973	1.10197	0.553387	-1.0984	-1.03549	1.17451	1.19006	-1.43497	-0.690701	-0.558697	-1.12247	1.17616	-0.874863	-1.0293	0.117324	0.121124	-1.77456	-1.39947	0.0636883	0.571169	0.983974	0.173673	-0.380254	0.657664	-1.51459	2.422	0.296126	1.4845	2.01652e-05
DDX5	no	no	-2.96386	-4.07134	-3.58463	-3.60933	-3.3999	-2.68381	-3.65087	0.111808	-1.32226	-3.27552	-3.46986	-3.56622	-3.25919	-3.65353	-1.09075	-2.38065	-3.23604	-3.53705	-3.1928	-3.05937	-2.4249	-2.80932	-3.85137	-3.26857	-3.12009	-2.01242	-3.70584	-2.9452	-3.13965	-1.69949	-3.29157	-0.676455	-2.86581	-3.28563	0.668467	0.0229062
PFKL	yes	no	-3.30627	-3.30968	-2.82468	-3.12993	-2.92721	-2.73194	-2.51083	-0.447523	-1.10286	-2.6454	-1.49425	-2.47826	-3.98828	-3.20602	-0.121797	-1.37749	-3.65234	0.162537	-1.24993	-2.66487	-2.72222	-3.24015	-2.00626	-2.80833	-1.18522	-2.29785	-2.7563	-2.64892	-2.33992	-1.467	-2.52182	-0.434549	-2.26741	-2.9413	1.46545	1.36324e-05
GM2A	yes	no	-1.50959	0.487026	0.891712	1.52323	1.39309	3.06703	0.273608	4.71478	7.37328	6.91523	4.88789	5.57306	4.76947	6.28713	3.17799	0.884777	1.04127	3.35305	7.7052	6.58371	3.63345	6.73994	2.59023	7.89817	2.03588	6.84292	5.58548	7.92524	3.47684	2.52801	7.07378	5.48055	7.35917	4.51028	4.10363	0.000134898
CR1	yes	no	-2.07448	-2.20778	-2.94548	-2.15828	-2.82823	-2.89556	-2.36098	-2.11885	-1.29138	-0.401068	-0.916061	3.72939	-1.78884	-0.280484	-1.6424	-1.15163	-2.7228	-2.11411	-0.518719	-2.9434	-0.274343	0.39597	-1.25856	0.948191	-1.80379	0.640213	-1.66639	-0.366592	0.290865	-1.25817	0.00583449	1.20342	-1.56317	-1.81734	1.40429	0.000113748
LGALS3	yes	no	-2.81641	-2.61582	-3.32348	-2.9162	-2.12223	-3.31862	-2.76813	-1.64423	-0.33643	-0.470437	0.256553	-0.2154	-1.40375	-1.4515	1.03327	-0.874753	-3.20794	-1.70166	0.90931	-3.11299	-1.82122	-1.62963	-2.11724	-1.16216	-1.71604	-0.674881	-1.52419	-1.44492	-1.61969	-2.14746	-1.2883	0.128288	-1.93516	-1.76129	1.53293	6.44999e-06
IGFBP3	no	no	-1.06778	0.476186	1.11048	1.42052	0.83283	2.83037	0.602223	3.34552	3.12763	2.81126	3.09887	1.92697	3.62066	3.25347	2.46686	3.65113	3.27228	1.15574	2.38386	4.41644	2.16784	3.12603	1.8001	4.39528	1.73255	3.06995	3.36733	4.92751	2.24015	2.21108	3.80112	2.97838	2.2901	3.22401	1.8485	0.00995388
PSMC3	yes	no	-3.27584	-3.22042	-3.41184	-3.17946	-3.62731	-3.12045	-3.37385	-1.71655	-2.25279	-3.26202	-3.03876	-3.2102	-3.45912	-3.38583	-2.11796	-2.88003	-3.31317	-1.94383	-3.20687	-3.30717	-3.65017	-3.30914	-3.53201	-2.91072	-2.26087	-3.35854	-3.63786	-3.52791	-3.37449	-3.6229	-2.63932	-1.95041	-3.19129	-3.41047	0.405006	0.00781424
TCP1	no	no	-2.12502	-2.49731	-2.51308	-1.99954	-1.90349	-2.65861	-2.78197	0.399283	0.0443347	-1.52881	-0.319355	-1.46089	-2.12503	-2.50814	-0.892257	-1.17902	-2.47797	-1.68658	-0.918473	-2.42582	-2.13017	-1.77567	-2.75071	-1.423	-1.02224	-0.498437	-2.39921	-1.28911	-1.13117	-1.08483	-2.69668	0.474043	-2.29899	-1.51778	0.956022	0.00060652
ALOX12	no	no	-3.19348	-3.10615	-3.29787	-2.32729	-3.01908	-2.51792	-3.37653	-3.05798	-3.45336	-3.41687	-3.32813	-3.03536	-3.22963	-3.13245	-3.23239	-3.23267	-3.16355	-3.03041	-3.34105	-3.39969	-3.1136	-3.34953	-3.13831	-3.38385	-3.24929	-3.42248	-3.19864	-3.24621	-3.30533	-3.2642	-3.3586	-3.04957	-3.20487	-3.15619	-0.187275	0.357011
IGFBP2	no	no	-1.37783	-1.34874	-1.11329	0.139983	-1.2175	-1.45908	-1.42249	1.18002	-0.0217692	0.683831	0.433509	0.376144	1.28306	-0.425499	-0.969693	0.199333	-0.821966	-0.380255	0.325288	0.759052	0.497981	-0.0186523	-0.448426	3.43929	-1.19225	0.647614	-0.459115	1.05429	-0.480871	-0.529397	0.243171	-0.309499	-1.04062	-1.24492	0.9559	0.00364618
RPL35A	no	no	-4.28024	-4.54783	-4.15017	-4.9151	-4.4329	-4.34042	-4.5249	-4.64072	-3.28944	-4.10787	-4.99753	-3.98741	-4.4042	-4.63033	-3.21811	-4.71724	-4.66784	-4.60168	-4.9192	-4.327	-4.21654	-3.88981	-3.87979	-4.33404	-3.93631	-4.4995	-3.56334	-5.17103	-3.79637	-4.38902	-4.84778	-0.567246	-3.47465	-4.53567	0.154113	0.576676
ARF4	no	no	-3.40521	-4.1895	-3.46258	-3.70627	-3.92017	-2.84098	-3.78498	-0.790894	-2.59142	-3.57166	-2.75093	-1.84657	-2.87721	-3.6652	-1.10123	-3.42743	-3.25706	-3.61696	-3.54783	-3.42805	-3.62278	-3.8057	-3.36252	-2.50706	-1.77667	-3.09858	-3.55012	-1.85551	-3.89166	-3.15555	-3.44344	-2.76046	-2.62523	-3.88294	0.678019	0.00949441
RPL7	no	no	-1.82601	-3.15716	-2.82044	4.33715	-1.12219	1.2989	-2.85064	1.40048	0.104261	-0.273757	-2.93512	-0.211304	-1.96969	-0.0545287	-1.5786	-0.763307	-3.58066	-1.76451	-2.00747	-1.58898	-2.92102	-1.44382	-2.90374	1.77556	-2.74825	-1.3173	-1.72958	-1.51998	-3.04339	-2.09815	-3.19747	-0.212336	-1.55225	0.289574	-0.273005	0.851766
VCL	yes	no	-2.43342	-2.55141	-2.1398	-2.48498	-2.63156	-2.6399	-3.31174	0.459278	0.909599	-0.191267	2.13616	2.36257	-1.75013	-1.0848	1.50803	0.416185	-2.58527	-0.151217	0.115928	-0.182762	-2.40249	-1.13566	-2.47731	2.60081	-1.13505	1.08736	-2.3778	-2.06378	-1.92646	-0.881221	-1.5771	2.86338	-1.23065	-1.45933	2.05561	2.44579e-05
LBP	no	no	0.491101	2.73484	1.67024	0.652067	1.01499	0.843972	1.32269	2.87575	3.04512	4.32424	3.91323	2.77408	-0.210886	2.76741	5.78627	4.78069	1.5857	0.52328	3.12863	1.12922	-0.286408	4.11611	2.80724	2.51602	4.49228	5.23127	2.25327	2.69725	5.11424	4.52459	2.82331	4.09452	2.12179	4.01978	1.78584	9.10717e-05
IL1RN	no	no	-2.65818	-1.58559	-2.48474	-4.72002	-1.83855	-1.12979	-1.56918	0.890993	2.26932	1.8369	-0.789001	-0.336993	0.59534	0.979624	-1.54878	-1.4219	-1.30716	-0.739926	2.76471	-1.80817	0.128721	0.797255	0.186316	-0.771234	-0.0415107	1.79762	0.138676	2.49743	0.191415	2.68005	-0.416978	-1.16076	-0.0584752	-0.158322	2.59948	0.00112581
RPL17	no	no	-3.3305	-3.03096	-2.60383	2.43234	-0.146458	1.99117	-2.94937	0.473525	-1.57576	-0.901132	-2.47958	-2.31414	-3.73366	-0.803245	-1.53001	-2.84076	-2.30002	-3.15199	-1.28538	-2.04744	-0.912805	-1.53644	-3.03332	0.773635	-3.20242	-1.5538	-1.19366	-1.17751	-3.19367	-2.48665	-3.34681	-1.76358	-1.73317	-0.608629	-0.863018	0.451736
PGAM1	yes	no	-2.0351	-2.48467	-1.06577	-1.93175	-1.23109	-1.56316	-1.96703	1.43017	1.79828	1.23272	1.65304	2.69599	-1.46092	-1.7315	1.84283	1.69903	-2.93388	0.521287	0.490573	-1.56168	-1.45879	-1.28556	-0.363611	-0.345936	0.979784	1.79514	-1.63969	-0.916698	-0.787875	0.0211496	0.104589	3.45762	0.557927	-0.464592	2.22968	7.1021e-06
RCC1	no	no	-3.82205	-4.22863	-4.13029	-4.17278	-4.74428	-3.95418	-4.6541	-3.81836	-1.33497	-3.85718	-4.66877	-3.1781	-4.38988	-4.45288	-4.31511	-4.01574	-4.5138	-3.70741	-4.77036	-4.39544	-3.82089	-4.03769	-3.78656	-3.94688	-5.12702	-4.01468	-4.15573	-4.48132	-4.21594	-4.24087	-3.9078	-1.3037	-4.29969	-4.28996	0.234165	0.440276
SDC1	no	no	4.79328	5.90783	4.36754	4.01847	2.64862	6.5372	5.31806	5.46191	5.24176	4.65237	2.03394	3.44576	6.19649	5.22068	2.12083	3.19873	5.63844	4.16948	5.57106	5.55184	6.96553	4.95118	4.9724	5.00797	3.05137	5.10256	4.55521	6.14691	3.93012	3.44815	4.218	4.04668	5.83776	4.53253	-0.159097	0.816345
ATF6	no	no	-3.68611	-3.22286	-3.75576	-3.52447	-3.79216	-4.05845	-3.2674	-1.14039	-2.6237	-3.49298	-3.33085	-3.17475	-2.32452	-3.917	-2.67704	-1.62336	-3.38543	-3.74449	-3.03961	-3.85919	-3.8485	-2.58314	-4.05858	-3.49651	-3.6334	-1.7846	-1.42165	-3.23399	-3.05473	-3.37867	-1.39732	-3.61145	-2.57879	-4.27072	0.686681	0.00430404
KRT15	no	no	-4.4543	-4.60084	-5.30779	-4.43181	-4.29779	-1.83479	-4.35742	-4.56468	-4.46265	-4.88366	-4.49769	-5.32713	-5.35927	-3.74281	-4.06051	-4.63941	-3.6236	-4.98002	-4.90835	-4.31573	-4.49067	-4.31115	-4.68864	-4.71473	-3.8672	-4.46541	-4.19754	-5.05532	-5.08712	-4.74117	-4.4503	-4.25265	-3.92185	-4.02696	-0.484624	0.319312
KRT4	no	no	-1.238	-2.13477	-1.80719	3.24	1.05668	4.75532	-2.10702	-0.0873818	0.24528	-2.85661	-1.16584	-2.40601	-2.19278	4.0114	-0.493585	-2.05384	-1.58668	-2.01864	-0.774901	-1.47256	0.963242	2.79076	-2.23403	0.951478	-1.90958	-1.92847	1.80492	-1.60204	-1.64858	0.582195	-1.5391	-3.24635	-2.26686	-2.69786	-1.05609	0.437195
PAM	no	no	-1.60751	-1.60942	-2.05617	-1.829	-1.78737	-2.25525	-2.88638	-0.981535	0.319438	-0.030056	-1.65252	-0.141554	-2.01505	0.0765818	-2.02099	-0.879462	-2.45353	-2.30364	-0.116782	-3.11723	-1.34478	-1.4316	-1.38867	-0.139623	-1.80761	0.583648	-1.37163	-1.13319	-0.392141	-1.08909	-0.326619	-1.48102	-1.68751	-2.24535	0.956326	8.13769e-05
CDH2	no	no	-1.08404	-0.776834	0.147195	1.77029	-0.727931	0.973045	0.0889981	2.9423	2.6393	2.4376	-0.572678	0.829267	4.41346	2.65197	0.570803	0.652819	4.18222	1.00561	3.41524	1.59994	2.05589	2.9591	2.50531	0.561462	0.0809295	1.25086	2.43246	1.85073	2.1704	1.77668	2.46436	0.0219701	4.69805	2.57849	2.05538	0.00301386
CD58	yes	no	-0.121399	1.6625	0.0478319	0.69883	-0.554654	2.9466	-0.423175	1.7955	2.09076	1.79183	-1.73344	-0.464045	3.18263	3.18975	-0.980304	-1.68058	3.50671	1.73004	2.82444	0.0728684	2.70247	1.63097	2.57491	-0.867592	-0.588157	0.382776	2.59434	2.48804	0.731162	-0.356224	0.811048	-1.15627	3.39968	1.44821	0.728507	0.361636
VCAM1	no	no	1.71037	1.81525	0.633324	1.3558	1.77258	-0.60772	1.41876	4.39757	5.99677	4.75925	1.63132	2.78882	5.34038	4.85398	2.58665	0.728868	1.83378	5.46056	6.61064	5.44187	3.2161	4.51226	1.869	3.45099	0.378765	3.85403	5.20981	5.95185	4.13328	2.56911	5.46449	3.7509	6.37175	4.04329	3.3278	2.66609e-06
NCL	no	no	-2.84529	-2.58571	-3.09806	-2.40739	-2.58879	-2.78795	-2.80147	-1.13874	-0.978142	-2.29025	-1.45683	-2.33342	-1.81455	-3.27615	-1.67746	-2.32931	-3.31212	-2.4489	-3.04106	-1.98927	-1.44576	-2.80364	-3.05999	-1.77225	-2.60454	-1.72371	-2.59848	-2.0115	-2.59108	-2.10689	-2.25732	-1.77405	-3.59298	-2.68996	0.620811	0.00159057
HK1	no	no	-3.35035	-3.58316	-3.28758	-3.23996	-3.77584	-3.90646	-4.32399	-1.57235	-1.45434	-1.90976	-3.74186	-0.754738	-4.06431	-3.55352	-3.0967	-2.1268	-3.15399	-3.74885	-1.79237	-3.98432	-4.63034	-3.64763	-4.01875	-0.4246	-2.43626	-2.14368	-3.31636	-4.54419	-4.01797	-3.75894	-4.53633	-0.567387	-1.85272	-3.94643	0.676909	0.0317142
TNFRSF1A	no	no	-1.88826	-0.64001	-1.93822	0.799222	-2.47125	0.806606	-1.0213	-0.727886	1.26281	-0.256651	-3.50462	-1.08799	0.818034	0.971964	-2.13947	-3.62317	0.104397	-2.56816	1.65705	1.47583	-1.26176	0.00912333	-1.65522	1.47605	-2.74424	1.27188	1.16427	2.2102	-1.55613	-3.09776	1.19792	0.837782	1.06423	0.234234	0.503996	0.456347
GGT1	no	no	0.575887	0.398914	-0.0994572	-0.478067	0.456927	0.0847559	-0.192266	2.5159	2.67263	2.8609	-1.21292	3.05878	3.08836	3.32311	0.312845	1.27096	0.877287	0.274684	2.87498	1.85886	2.56019	1.37453	3.28081	2.95212	1.20664	1.98401	2.1532	4.10219	1.38902	2.22601	2.72287	0.405681	3.48216	2.06006	2.12233	6.44999e-06
ORM2	yes	no	4.17524	6.77111	4.10794	5.89765	4.78637	5.57384	3.55538	9.82504	10.2734	9.57562	7.80297	9.31216	9.59313	9.13881	8.52614	8.77255	8.79453	10.7618	10.8786	8.99045	10.8183	9.97591	8.55584	8.46421	7.2771	9.24976	10.2407	10.0061	8.51256	9.07887	10.0048	9.29552	10.3415	9.6303	4.41509	7.15863e-05
AOC1	yes	no	-2.51843	-2.23385	-2.29186	-2.15034	-2.1037	-2.33204	-1.89183	0.673268	-0.585967	-0.794826	-2.43334	1.00856	-2.76798	-1.90027	-0.669604	-1.91339	-2.29642	-1.98523	-1.39956	-1.72859	-0.973294	-2.20075	-1.02276	-1.25574	-1.81379	0.24626	-1.2438	-0.543497	-0.58315	-1.83175	-0.153084	-0.00973091	-1.29516	-2.16956	1.00986	0.000165855
ITIH2	no	no	2.06969	2.7474	1.9575	2.58143	4.01168	2.33255	2.35336	5.79437	5.24012	7.41572	7.78902	6.02206	3.00783	5.23632	7.98159	8.66776	-0.0799257	2.82329	3.28067	4.07676	0.589036	7.87295	7.12183	3.23265	7.76954	6.54474	5.07092	1.34997	8.3264	8.17789	5.30724	6.19759	5.74602	6.93496	3.06229	3.93049e-05
ITIH1	no	no	0.715421	1.72599	0.874336	1.30678	-0.208081	1.26766	2.43275	4.0588	3.76183	4.78092	6.67342	5.35179	1.61894	2.0885	6.97204	7.66682	-0.295698	1.60707	1.38215	2.43328	0.92149	6.36611	5.43194	0.269074	6.34094	4.96432	3.44049	-0.557967	6.97182	7.11624	4.16687	4.96065	1.225	3.96746	3.24568	1.0912e-05
CEL	no	no	-2.09564	-1.17582	-1.72462	-1.62961	-1.52224	-2.52185	-1.60367	-0.358841	0.358217	2.30355	-1.4861	-0.211675	1.10328	1.72679	-2.6771	0.28157	-2.23483	-0.694258	1.13153	-2.57429	0.0482284	0.892657	2.10668	0.433572	0.414155	-0.270088	1.58911	-0.540304	0.542295	0.234595	-0.277906	-1.90703	1.71372	0.170261	2.02279	9.07627e-06
NCF2	no	no	-2.58878	-3.00471	-3.23945	-2.84525	-3.16917	-2.43235	-2.92875	-0.33887	-3.11862	-2.25398	-1.86271	-2.44989	-2.01315	-3.09408	0.526229	0.0974414	-3.48453	-0.85562	-3.28375	-1.1418	-3.12927	-1.05994	-2.01061	-1.61998	-0.729346	-1.22857	-3.23775	-3.15314	-1.76263	-1.75661	-3.16825	0.318838	-2.63945	-2.59347	1.12603	0.00160296
PI3	no	yes	-2.66065	-1.53933	-1.57036	4.2032	1.3615	2.77677	0.168627	-0.48368	2.01285	2.84163	1.76157	-0.605719	-1.05492	3.22531	-2.4854	-1.68339	1.59817	-1.10603	0.678927	2.05406	1.01376	2.20144	0.713564	0.0471585	-1.90977	0.249024	-0.45092	1.97872	-2.35601	2.28376	-1.38456	-0.439281	3.0822	-0.655191	-0.0157685	0.990428
AMY2B	no	no	-1.55859	-0.484873	0.192687	0.0592073	-2.13147	1.33693	0.0834486	3.67303	5.08969	3.754	-0.683495	2.43329	4.44693	5.02147	0.895096	3.06475	5.00116	3.46852	3.49292	-1.27363	3.37937	3.60093	4.94148	-0.766396	1.65602	2.04987	5.33612	1.93067	5.0955	4.39117	4.8908	2.61414	2.15871	2.33995	3.61749	8.4603e-05
TYMP	no	no	-2.56198	-2.00414	-3.666	-2.4156	-2.82053	-2.83447	-2.00308	-0.470759	1.41331	0.491547	0.622441	1.74612	-2.699	-3.06432	-0.247239	-1.65855	-1.88111	-0.843531	1.4823	-1.29657	-3.25883	-2.46299	-2.08417	-0.645263	-1.46893	-0.151698	-2.27898	-0.221701	-2.22076	-0.93782	-1.63251	1.83895	-0.668041	-2.63266	1.8204	0.000214664
EIF2S2	no	no	-2.98931	-2.82125	-3.54408	-0.623554	-3.83463	-1.26889	-3.14522	-1.18904	-0.942715	-2.6421	-1.6701	-3.12998	-1.3748	-3.35507	-2.67359	-3.23678	-1.69976	-2.2675	-2.78065	-1.57819	-1.32581	-3.73142	-3.34878	-0.404282	-2.01039	-2.07863	-3.15566	-0.739511	-3.92314	-2.49657	-1.9679	-1.50144	-1.95986	-2.46386	0.226693	0.674238
TCN1	yes	no	-1.41975	-1.52502	-1.10546	-3.28239	-1.01608	-2.35534	-1.54788	-0.449882	-0.493593	0.399347	1.47899	5.25829	0.0439911	-0.823306	1.42945	1.67816	-0.48661	0.0484896	1.26313	-2.0513	-1.86335	0.303341	-1.06632	1.00346	1.99412	2.20565	-1.96116	-0.677934	1.57608	2.22164	0.959729	2.82799	0.940104	-0.325185	2.92126	9.82437e-06
TCN2	no	no	-3.70578	-3.79551	-3.9134	-3.90324	-3.99377	-4.02067	-3.83614	-3.36676	-3.15629	-2.77568	-3.40608	-3.70899	-2.90689	-2.70345	-3.6508	-3.61212	-1.77509	-4.18083	-2.77407	-3.64753	-1.75596	-2.92142	-3.47491	-4.05781	-3.69284	-3.29595	-3.69167	-2.94081	-0.846703	-1.79064	-2.35252	-1.48342	-2.38078	-3.86983	1.03992	9.59944e-05
ANXA7	no	no	-2.57027	-2.59413	-2.34265	-2.48258	-1.84083	-2.17037	-2.4698	-1.58393	-0.655369	-0.48849	-1.16414	1.90682	0.0906654	-1.12987	-1.21934	-2.17711	-2.4554	-2.12478	-0.191992	-1.67163	-1.32829	0.864005	-1.23391	0.825679	-2.01442	0.831632	-1.78007	0.256706	-2.14052	-1.10895	-1.0078	-1.47406	0.170939	-1.33221	1.4182	3.26923e-05
CD33	yes	no	-2.11747	-2.75631	-2.48905	-1.88256	-2.30603	-2.39118	-3.07595	-0.822423	-0.486997	-1.17221	-2.89534	-1.05407	0.37952	0.930346	-2.26416	-2.08648	-1.56051	-0.962663	-0.668264	-1.93832	-2.01084	-2.18507	-2.36415	-1.26542	-3.11316	-0.96528	-0.417822	0.152083	-0.00640866	-1.97313	-1.16442	-2.96176	0.455195	-1.32929	1.24366	4.61878e-05
PGC	no	no	-1.53039	-2.25728	-3.56373	-2.63922	-3.2153	-3.50943	-1.63675	0.171186	3.65561	-0.584257	-0.828875	-1.19682	-0.778932	-3.93549	-1.12803	-3.37131	-2.02652	-1.23856	2.19078	-1.05385	-2.19777	4.43431	-2.63449	-2.25395	-3.25928	2.0429	0.772598	0.626819	-2.90993	-2.30256	1.72778	-1.96112	3.11024	-1.13879	2.84817	1.38492e-05
AZU1	yes	yes	1.24008	1.46617	2.29423	1.73882	0.666499	0.875703	0.966323	2.85132	4.40738	1.35464	2.62407	9.37479	4.67819	4.35629	4.98743	4.66481	1.63726	4.96041	4.71563	2.96687	2.28192	4.11167	1.08315	7.47883	5.25321	6.34482	1.90976	0.923062	1.55518	3.99079	4.33028	3.12476	3.20152	2.86653	2.2035	3.37693e-05
TPSB2;TPSAB1	no	no	-2.14573	-1.05582	-2.15806	-2.12852	-3.85845	-3.82471	-4.26481	-4.18418	-3.3604	-4.04642	-4.06727	-3.74412	-4.2442	-2.48626	-3.89333	-4.42642	-3.46832	-3.86214	-4.04996	-3.60786	-3.42539	-4.11735	-4.9392	-3.97346	-3.98621	-4.25895	-3.65212	-4.13163	-4.47086	-4.29278	-4.11509	-4.34479	-4.6236	-4.47093	-1.17394	0.075865
TNFRSF1B	yes	no	-2.12383	-1.96722	-3.27685	-1.94034	-2.61956	-1.03472	-2.89275	-1.08866	0.0988949	-0.266638	-2.52127	-2.3349	-0.625638	0.589063	-2.99407	-3.77844	-0.175496	-2.50947	-0.162032	0.0279703	-1.47853	-0.770789	-2.62248	0.536583	-2.70675	1.06247	-1.13493	1.89138	-2.68276	-1.94017	-0.853064	-0.34015	1.0763	-1.40595	1.18658	0.0105568
RAB5A	no	no	0.083603	-0.158106	-0.262776	-1.24701	-0.343117	-0.474361	-0.000984681	2.02318	1.70624	0.994569	2.56551	2.03667	1.10716	0.604394	2.28017	0.915322	0.597268	1.32801	1.82324	0.0787749	1.18097	0.272625	0.702991	1.15089	0.584271	1.89554	0.41069	1.63528	-0.26145	-0.302963	0.284554	2.83284	2.18056	0.620876	1.64017	6.44999e-06
RAB6A	yes	no	-3.02178	-3.3121	-3.35284	-2.97212	-2.84404	-2.91129	-2.96391	-1.40254	-1.28938	-2.55001	-0.403696	-1.05851	-4.36458	-2.37937	-0.712261	-0.149413	-2.52445	-1.55817	-1.24191	-2.71279	-2.90489	-0.389215	-2.25552	-3.57285	-1.0116	-0.136106	-2.84111	-2.1427	-1.75977	-2.72121	-1.86994	-0.688534	-0.199144	-2.85992	1.22205	6.50649e-05
PVALB	no	no	-3.54958	-3.39036	-4.42794	-3.7001	-4.55993	-1.23679	-3.61281	-0.747582	-1.42154	-2.44423	-3.84564	-2.29017	-0.331165	-3.60041	-4.02609	-4.8496	-0.622822	-3.59195	-1.98084	-3.26012	1.19813	-2.76365	-1.42042	-2.76959	-2.72122	-3.27368	-2.87313	-2.57029	-2.93798	-4.61625	-4.38358	-3.97031	-0.435878	-1.53539	0.854921	0.146835
PSMB1	yes	no	-3.59186	-3.09706	-2.46816	-2.95381	-1.73455	-3.29407	-2.53004	-0.617765	0.303773	-0.520746	0.132965	1.63648	-2.54297	-3.36958	-0.210326	-0.378254	-3.11663	-0.905386	-1.50708	-2.72877	-2.13704	-2.20938	-2.24079	0.804775	-1.16322	0.475196	-3.61343	-2.85418	-2.88769	-1.48986	-2.84321	0.840709	-2.00609	-1.64673	1.60926	8.10097e-05
LMNB1	no	no	-1.75803	-1.98367	-1.37377	-2.21923	-2.42214	-2.85932	-2.61342	0.724298	0.0539278	-1.38474	0.369607	-0.0197063	-0.678795	-2.10889	2.45	2.15996	-1.94018	-2.16704	-2.04881	-0.408374	-2.11247	-2.32819	-2.19939	3.50458	-0.31354	0.202234	-2.50116	-1.91256	-1.28761	-0.148364	-0.554941	2.91819	-1.76822	-0.845282	1.25035	0.00757624
DDC	no	no	-4.21014	-4.35839	-4.17152	-4.15595	-4.29781	-4.25547	-3.91248	-3.42634	-1.08372	-1.84471	-3.87557	-2.10509	-4.3105	-4.19701	-2.77587	-2.87872	-4.48908	-4.75509	-2.96873	-4.58483	-3.95818	-4.10164	-4.23436	-3.713	-4.48492	-2.59589	-4.74407	-2.21891	-4.59334	-2.96834	-2.49274	-4.87699	-3.56929	-4.65899	0.661144	0.0124556
PZP	no	no	-1.37582	0.694579	-0.409166	-0.654829	-2.47152	-0.819725	-1.57922	2.68183	-1.50049	1.81872	2.49221	-1.07166	1.68639	2.19597	8.9964	4.71024	-1.66373	-1.66372	0.0762458	-1.14874	-1.46764	4.6798	5.19896	-1.10524	6.03583	2.17023	-0.783736	-1.39709	6.79426	4.88411	-1.01501	4.7232	-0.594815	2.94442	2.92706	0.000756635
OGN	no	no	0.0857176	-0.317393	-0.331672	-0.493806	0.382225	-0.35	-0.823803	0.292504	3.93859	2.02588	0.630399	2.46638	-0.023646	1.17365	0.00395524	0.812682	-0.811257	0.62596	3.22979	3.7332	-1.19636	2.90873	-0.0806075	3.47146	1.36272	2.30318	2.51065	3.30431	-0.8279	0.807991	3.90586	2.3901	1.83707	1.80095	1.95012	1.21805e-05
EDN2	no	no	#NUM!	#NUM!	#NUM!	#NUM!	#NUM!	#NUM!	#NUM!	#NUM!	#NUM!	#NUM!	#NUM!	#NUM!	#NUM!	#NUM!	#NUM!	#NUM!	#NUM!	#NUM!	#NUM!	#NUM!	#NUM!	#NUM!	#NUM!	-0.175758	#NUM!	#NUM!	#NUM!	#NUM!	#NUM!	#NUM!	#NUM!	#NUM!	#NUM!	#NUM!	#N/A	#N/A
CAST	no	no	-1.22047	-1.47599	-1.05951	1.61019	-1.05477	2.5418	-1.63145	0.92674	0.91324	0.358487	1.13604	-0.103339	-0.929339	0.291967	-0.760094	-0.60618	-1.58504	0.0170556	0.955749	-0.600688	-0.943214	-0.105771	-1.45112	1.79648	-0.246182	0.304372	-1.71351	-0.741504	-1.13927	-0.399953	-1.57172	0.176002	-0.516931	0.553012	-0.0851401	0.91639
EFNA1	no	no	1.40704	1.22182	0.961933	3.32681	-1.00051	1.40537	3.18534	1.57615	1.47512	0.4074	-1.6632	-1.19703	1.6445	2.24624	-1.74564	-1.45904	2.99836	-0.0612168	-0.0390362	1.70219	1.04116	0.570145	0.607761	1.95078	-1.34793	1.3942	1.60305	2.39719	0.52858	-1.80461	0.568521	-0.445741	1.63686	0.726384	-0.889841	0.229043
C4BPB	no	no	-3.36694	-0.919136	-1.9458	-1.01191	-1.60641	-2.57858	-1.63181	-2.83903	-0.250952	-1.20071	2.41538	1.54771	-0.541454	-1.44511	3.63891	2.86494	-0.42947	-2.18119	0.216353	-0.836122	0.160789	3.38083	-0.353539	-2.2467	1.34812	-0.897867	-0.250833	-2.50531	1.12272	3.35149	-0.44853	1.58746	-1.52309	-2.65037	1.99008	0.000531738
MAG	no	no	-2.75207	-1.93981	-2.50534	-1.06767	-2.53079	-1.3301	-2.36903	-1.37093	-0.806477	-2.54162	-2.70392	-3.52905	-1.89507	-2.05777	-2.61704	-2.28329	-0.0959065	-1.42674	-1.2039	-2.32382	-2.12907	-1.37787	-1.42364	-2.79222	-2.6928	-2.59592	-1.18096	-2.39338	-2.60959	-1.61603	-2.10731	-2.44962	-1.32003	-0.428733	0.397694	0.318287
FLG	no	no	-3.84238	-3.83691	-4.45338	-2.69855	-3.17378	-2.44995	-3.70945	-3.00958	-4.28084	-3.59465	-4.25486	-4.28164	-3.69047	-2.00494	-3.66183	-4.18813	-3.65271	-0.907558	-3.22152	-3.8323	-4.30713	-1.95339	-3.67932	-3.93513	-3.66361	-0.10421	-3.58713	-4.65241	-3.82616	-1.71301	-4.00443	-3.42049	-4.44347	-3.98696	0.125085	0.779793
AGA	yes	no	-0.259085	-0.954907	-1.93453	0.651768	-1.5508	1.52076	-1.43845	-0.687404	0.510789	-1.70333	-2.41546	0.782436	0.809016	0.307677	-1.78183	-2.02906	1.54362	-1.52787	0.469613	-2.00278	-2.33448	-3.50356	-1.76384	2.05064	0.0344357	-1.26552	-1.70659	-1.18121	-0.400022	-2.02612	0.0534927	-0.803103	-0.2335	-1.44172	-0.254153	0.724228
PTMS	no	no	-3.94236	-3.47693	-3.67136	-2.88549	-3.03307	1.65809	-0.730601	-0.150614	-0.183922	-1.1218	-1.48869	-3.11808	-1.01942	-1.51546	-2.21615	-3.7743	-0.19121	-2.1894	-2.02834	-2.13757	-0.227605	-3.43196	-1.99644	0.847215	-3.64301	-1.76799	-3.58392	-1.483	-3.95467	-3.58992	-2.92079	-1.96954	-0.419133	-0.00205036	0.340271	0.724228
ENDOU	no	no	-4.58724	-5.09167	-4.48069	-1.89226	-3.66245	-0.939787	-4.45654	-4.82212	-4.14635	-3.67012	-5.22626	-4.91688	-3.0053	-3.91939	-5.06404	-4.87606	-2.18401	-5.38457	-4.11616	-4.75846	-3.499	-3.29916	-4.57745	-4.70607	-4.44993	-4.65786	-4.72372	-3.77271	-5.17906	-4.61154	-4.38037	-4.691	-4.42909	-4.82527	-0.579583	0.44665
GSTM3	no	no	-4.38812	-4.58987	-4.18048	-3.97671	-4.6374	-4.85318	-4.13659	-0.0118929	-0.917476	-3.23158	-5.15237	-3.29121	-2.71164	-2.32548	-3.26524	-4.07755	-3.71504	-4.05187	-1.7948	-4.12679	-2.19224	-1.34784	-3.11773	-5.0179	-3.11695	-2.19254	-3.6333	-2.63468	-1.48599	-2.1623	-2.73501	-2.80455	-1.47774	-4.05238	1.4596	2.99207e-05
ATP6V1B2	no	no	-3.33961	-2.9297	-2.72999	-2.63961	-3.03448	-2.72737	-2.76029	-1.71083	-1.60537	-2.12544	-1.27998	-1.86681	-3.764	-3.05446	-0.865322	-1.26155	-2.85529	-2.7757	-1.99843	-1.64002	-2.49489	-2.21077	-2.86539	-0.953382	-1.83564	-1.80831	-2.86915	-2.48066	-2.36733	-1.59169	-2.22625	-0.136781	-2.20769	-2.83006	0.889751	0.000292694
ATP6V1C1	no	no	-5.04939	-4.72412	-4.34227	-4.69455	-4.77969	-4.73843	-4.37508	-4.25573	-4.49623	-4.94955	-4.63766	-4.57801	-4.65489	-4.67258	-3.02896	-5.10405	-4.57161	-4.8239	-4.93227	-4.54648	-5.05885	-4.36264	-4.60673	-4.58135	-5.10644	-4.75207	-5.11725	-5.01374	-5.02585	-5.20588	-4.06858	-4.2893	-4.87606	-4.59866	-0.0635315	0.756203
FLNA	no	no	0.171747	-0.267812	0.101075	0.258516	-0.46788	0.30777	-0.877977	1.04446	0.809784	0.513331	2.82436	1.69928	0.869833	0.266366	2.56244	2.15724	-0.157002	1.38788	0.487749	1.70848	0.0384739	0.378499	-0.17328	3.4717	1.41507	1.98753	0.672378	0.526314	-0.401924	0.920465	1.14317	3.3818	0.470094	-0.114551	1.31179	3.36379e-05
ACO1	no	no	-2.51867	-2.5705	-2.86712	-2.83587	-2.835	-2.87426	-2.49195	-2.93832	0.393368	-0.492986	-2.27427	-0.509356	-2.60391	-2.98678	-1.79667	-1.59782	-3.18204	-2.12139	-1.53517	-2.70496	-2.87239	-1.89393	-1.80804	-2.77727	-0.780924	-0.649636	-0.309581	-1.5751	-1.23387	-1.04376	-1.90924	-1.39197	-2.42329	-2.8396	0.895479	0.000504087
S1PR1	no	no	-3.04797	-4.1723	-4.20996	-4.13271	-4.10833	-2.2611	-3.351	-2.33939	-3.565	-3.63073	-4.16744	-4.2047	-2.40429	-4.03926	-4.30658	-3.74162	-3.67423	-3.63543	-0.861914	-3.91984	-4.23952	-0.648054	-3.7924	-3.45282	-3.91437	-2.72323	-3.70053	-1.75367	-4.18052	-3.3284	-1.70192	-2.14492	-2.6338	-1.56947	0.279568	0.450397
KITLG	no	no	-3.37729	-2.85552	-2.54884	-2.75106	-2.45902	-2.98855	-2.87899	-1.10029	1.15503	-1.33472	-3.06838	-1.56275	-0.607817	-0.144302	-2.41858	-2.70163	-1.36474	-1.32736	2.20685	-1.04387	-0.0337453	0.0541368	-2.3849	-3.28423	-1.8962	0.872688	-0.462744	0.954253	-1.63919	-3.61337	1.54621	-0.0535817	0.827578	-1.20339	1.87985	1.64138e-05
GPD1	no	no	-2.94466	-2.41441	-2.77888	-2.54518	-3.24566	-3.23261	-2.53881	-2.00639	0.788687	0.822609	-2.83856	-1.65739	-2.17395	-2.66548	-0.709963	-2.22586	-2.93043	-2.68971	-0.88259	-2.53055	-2.08708	-1.29159	-1.18304	-2.57678	-1.75283	-0.757177	-2.52826	0.421171	-1.47079	-0.316656	-0.896634	-2.27833	-0.0104457	-1.99976	1.18509	0.000186329
EPHA1	no	no	-2.50531	0.490329	-2.93235	-2.23373	-2.04367	0.49427	0.0328438	-0.634038	-2.11154	-1.52487	-2.31282	-2.0359	-1.97183	-0.0166634	-3.14248	-1.69741	-1.81604	-2.33519	-0.756214	-0.461839	-1.82627	-1.32618	-2.20539	-1.10862	-2.48033	-0.636243	-1.76984	-0.754003	-0.723213	-1.41367	-1.8369	-1.86702	-1.12401	-2.08992	-0.473857	0.468366
C5AR1	yes	no	2.12794	-4.35725	-0.719702	1.09251	-0.754387	1.6844	1.35542	-1.78721	-3.55833	-1.51815	-2.77693	-3.02759	0.5652	-0.545597	-3.48995	-2.78405	1.826	-2.66086	-2.74354	-1.22849	1.39193	-2.53499	-3.09532	-3.18759	-3.86647	-2.99352	-1.10731	-0.230972	-2.96931	-2.21139	-4.19486	-3.11686	-2.83785	-3.14574	-2.36125	0.025885
MSR1	no	no	-2.77523	-1.09807	-3.24172	-1.14755	-3.59848	-3.54444	-3.29791	-0.958864	-2.83001	-1.76955	-3.35103	-3.50697	-0.351876	-2.47669	-3.25997	-3.09957	0.665656	-3.73153	-2.6943	-3.74703	-0.275758	-2.99397	-2.99659	-0.290957	-3.12983	-2.5459	-1.89891	-0.764525	-2.91523	-3.41522	-3.30709	-3.61481	0.123109	-1.49517	0.496595	0.421553
VDAC1	no	no	-3.8863	-3.6861	-4.0357	-4.07051	-4.39292	-4.06245	-3.74624	-4.35693	-2.3727	-2.97389	-4.16038	-3.57432	-4.26899	-4.00814	-4.26401	-3.47942	-3.84338	-4.17252	-1.67452	-3.63341	-3.83278	-3.00831	-1.91013	-2.45227	-3.94535	-3.36699	-3.62873	-1.07984	-4.18999	-2.84	-2.90978	-3.90213	-3.8124	-4.69596	0.505726	0.0258282
FGFR2	no	no	2.53719	1.94196	1.03362	2.72895	0.803692	3.2135	2.7865	1.31046	0.936062	-0.54266	-2.83281	-1.76608	2.48071	0.639177	-1.74935	-1.12043	3.33116	0.123776	1.20125	0.398555	3.20822	-0.340707	0.759869	-1.543	-1.22242	0.530323	1.62139	1.8238	0.892719	-0.361062	0.633274	-1.748	0.0455043	0.842928	-1.86962	0.002059
BGN	no	no	-0.583057	-0.644403	-0.337214	0.817068	-0.169156	-0.515781	-1.12812	2.75729	2.31512	1.49461	-1.01646	-0.335225	1.7381	1.0717	-0.450747	0.388923	0.221648	-1.04775	1.55585	0.66795	1.07186	1.86065	1.65634	-0.220735	-0.555419	1.48611	1.00122	2.5663	1.6537	0.986379	2.14388	-1.49942	2.85434	0.235547	1.13412	0.00207114
CD9	no	no	2.9554	1.96141	2.95179	3.39594	0.709507	4.52672	1.01368	3.47867	3.03979	0.941611	-0.575742	-0.678812	4.22021	2.37799	0.174642	0.0959296	3.40897	0.753415	3.13806	1.58069	5.07856	2.09955	2.92073	3.93361	-0.0825388	0.469758	1.51777	3.31633	0.0174794	-0.670631	2.96573	1.19632	2.96762	0.933157	-0.701366	0.329777
COMT	no	no	-4.33243	-5.07974	-5.04735	-4.81147	-5.22401	-4.92358	-4.97666	-2.22779	-2.88276	-3.32848	-4.65449	-6.14104	-3.13841	-4.40859	-2.90771	-2.72161	-3.27374	-2.56043	-2.94328	-5.08576	-4.58129	-4.49312	-3.59192	-4.83425	-4.1378	-4.38314	-3.19463	-4.25254	-2.88224	-2.43057	-2.17015	-4.79022	-4.83125	-2.95531	1.17699	9.23709e-05
TGM2	no	no	-2.784	-3.28724	-2.44197	-2.36727	-2.03297	-1.74484	-2.89385	-1.00227	0.768285	-1.97001	-2.5209	-2.55156	-1.76672	-2.11139	-0.541562	-2.08255	-3.28319	-2.95963	-2.01151	-0.44907	-1.95512	-1.60405	-2.97733	-0.561151	-3.09549	-0.0803517	-2.67277	-0.754376	-2.34184	-2.83649	-0.726607	-1.45659	-1.56852	-2.94261	0.942292	0.00283174
PCMT1	no	no	-2.97847	-2.46507	-3.18188	-3.11798	-3.04055	-2.70245	-3.14627	-1.89707	-2.30252	-1.91186	-0.929927	-1.57786	-2.74963	-2.82019	-0.490492	-1.66837	-3.46435	-2.07953	-1.5334	-2.04503	-3.51919	-1.22577	-1.94116	-2.13122	-1.10102	-0.305156	-1.89337	-3.55177	-1.52605	-1.81485	-0.0478542	-0.492507	-1.27468	-2.19935	0.992084	4.55702e-05
TNXB	no	no	2.17927	2.14088	0.719833	2.92653	0.948675	3.42072	1.63057	1.89767	1.66788	1.97667	1.31503	-0.139237	3.11985	3.04843	0.79182	1.37426	3.59661	0.890924	2.41677	1.76883	2.7441	1.89228	2.29924	1.65309	0.799448	1.99941	2.11607	2.64265	1.29355	0.68111	2.38953	0.169697	2.47587	1.45321	-0.135868	0.812802
CDH3	no	no	-1.4966	-1.62565	-1.11598	-0.648597	-1.22398	-0.638669	-1.56431	1.47118	2.14432	0.749379	-1.97922	-1.44671	0.447789	2.2468	-1.61896	-1.65037	-1.70354	0.774074	2.96813	0.475403	-1.28254	2.13094	-0.854978	0.106528	-0.899631	1.00467	2.06581	3.18888	0.738242	-1.40836	1.70463	-0.671389	2.49556	-0.317596	1.75956	8.48384e-05
PAICS	no	no	-3.25206	-3.10431	-3.04422	-3.45771	-3.48005	-3.36486	-3.01954	-2.15684	-1.86707	-1.6549	-0.297446	-0.809056	-2.66875	-2.74217	-0.825028	-2.67917	-3.11968	-2.63231	-1.35839	-2.86282	-3.73835	-3.0448	-3.1132	-2.26705	-2.02694	-0.424834	-3.64045	-3.80839	-3.13227	-1.95614	-3.3801	-0.474829	-2.49233	-2.59661	0.972694	0.000417433
IDS	no	no	-2.88239	-3.48389	-1.99435	-2.44709	-3.33203	0.121358	-2.79517	-0.607354	-1.02933	-1.8271	-2.65022	-1.36493	-0.161307	-1.28686	-3.09734	-2.94634	-0.48918	-2.3029	0.322139	-2.87416	-0.319023	-2.23185	-1.55231	-0.805308	-2.07609	-2.48879	-1.2222	-0.755231	-2.30499	-2.52218	-2.25312	-3.46871	0.0554211	-1.6303	0.756215	0.176746
SCP2	no	no	-5.06712	-4.84106	-4.7285	-4.35268	-4.56608	-5.23659	-4.91756	-1.83015	-3.63255	-2.98034	-2.34373	-2.60856	-5.39188	-3.14098	-1.28981	-4.43092	-5.36275	-4.96558	-4.5354	-4.68977	-4.8583	-2.76568	-5.25002	-2.88484	-4.38569	-3.59793	-4.22231	-4.55821	-5.37996	-4.46352	-5.03492	-3.76862	-4.99258	-3.37246	0.887627	0.00421917
UBA1	no	no	-2.84451	-3.11525	-2.65404	-2.00907	-3.57553	-2.79428	-2.92135	0.309508	0.148709	-0.998587	-0.673907	-0.524493	-2.15417	-3.04637	0.192167	0.357154	-2.29404	-0.797753	-0.358635	-3.22421	-1.75666	-2.24552	-1.92929	-2.14568	-0.802402	0.150685	-2.43522	-1.68667	-1.06014	-0.549286	-1.75089	1.45883	-1.55774	-2.31717	1.52122	1.10902e-05
GPX3	no	no	3.52592	3.0613	3.49022	3.08734	3.13213	3.70171	3.25201	4.2503	4.77751	4.55164	3.45974	4.91866	3.15709	4.90189	4.15296	4.96689	4.11017	2.84278	3.54436	1.95289	4.94516	4.31085	5.45447	4.34944	4.37101	5.06012	4.60945	4.87518	4.28213	3.21549	4.39407	3.46911	4.00911	4.27845	0.879511	0.000118775
NME2	yes	no	-1.06347	-2.49073	-1.99677	-1.14578	-1.9973	-0.713046	-2.79253	1.95625	2.05777	1.33237	2.52444	3.09272	-1.08633	-1.05839	1.29751	0.349371	-3.4002	-0.961326	1.03746	-1.20461	-1.75742	-1.04236	-0.405721	2.36462	0.640778	2.29007	-0.402328	-1.11239	-0.0500139	0.177103	-1.35943	2.44377	-0.0343553	0.769806	1.93434	0.000125361
FGFR4	no	no	-2.74098	-2.75023	-2.74787	-2.6949	-2.953	-3.14057	-2.9137	-1.43477	-0.588944	-2.60057	-2.56616	-2.56318	-1.26551	-0.514091	-3.09848	-2.70843	-2.86806	-2.83262	-0.356439	-1.94266	-2.59747	-0.803856	-2.79683	-2.38701	-2.28846	-1.61233	-1.61221	-1.90982	-2.72802	-3.04834	-0.255904	-3.44763	-1.47737	-2.3293	0.685138	0.00744756
SPRR1B	no	no	-4.49939	-3.7335	-3.40991	3.32576	1.7919	2.95983	-0.167976	-0.839311	3.82155	2.97184	2.21482	-1.53916	-0.449134	3.2418	-1.94756	-3.93444	-2.65314	-1.82702	-0.0688361	0.374007	0.511334	3.72071	-1.86675	-1.87059	-3.25771	-3.08805	-0.993916	-0.742089	-3.15098	3.48199	-4.21902	-1.99594	-3.53884	0.0177667	-0.539349	0.707369
SPRR2D	no	no	-5.0509	-4.03665	-3.51049	1.8911	0.354598	3.02096	-0.241371	-2.95679	3.10136	-1.03753	1.18701	-3.4792	-2.81731	2.39906	-2.58699	-3.96913	-1.77064	-2.10407	-3.01039	-0.839475	0.0430561	0.808759	-1.9476	-3.46099	-2.79184	-3.42053	-1.69137	-2.97823	-3.90293	2.90097	-4.94569	-2.95346	-4.29835	-3.69952	-1.3665	0.292828
FGFR3	no	no	-2.22407	-1.75336	-2.75491	-0.469537	-2.42333	-0.213109	-2.69038	-0.749293	-0.177568	-2.29828	-2.24625	-2.55087	0.278869	-0.536889	-2.51358	-2.55636	-2.06443	-1.7527	-1.0411	-0.682502	-1.81515	-1.58103	-0.535277	-0.523617	-3.43636	-2.05157	-0.136255	-0.727148	-1.82238	-2.96239	-1.97555	-3.03084	-1.17492	-1.25778	0.253105	0.653345
HNRNPA2B1	no	no	-2.86332	-1.70685	-1.63899	-0.388071	-2.09432	-3.80969	-1.36922	2.56063	1.14295	-0.194501	-0.43304	-0.828841	-0.33405	-1.47324	2.1052	1.42549	-2.71549	-0.247922	-1.42976	-0.129072	-1.00207	-0.204699	-3.36547	0.721934	0.562916	1.05117	-0.379034	-1.32986	0.878781	0.288334	-1.34461	2.17879	-1.47558	0.227646	1.95488	0.00334158
CBL	no	no	-4.27431	-5.48776	-4.18884	-5.05703	-4.67752	-5.40847	-3.85116	-3.4906	-5.49406	-4.76437	-0.472939	-2.60031	-4.27481	-4.34932	-2.55718	-4.19928	-4.49135	-4.8223	-3.53205	-4.04102	-4.04645	-4.9531	-5.76546	-3.4098	-3.91861	-3.26426	-5.25152	-4.14745	-4.07526	-4.70328	-4.70768	-1.00398	-2.66201	-3.00615	0.781691	0.00509351
IGFBP4	no	no	-2.99743	-3.21155	-3.12989	-3.2273	-3.13428	-3.01949	-3.07288	-2.84946	-2.82907	-2.47174	-1.61685	-1.80767	-2.94387	-2.71112	-1.90419	-1.57549	-3.10604	-3.70732	-3.51812	-2.48374	-3.50357	-1.97421	-3.33265	-1.53563	-1.10924	-0.845854	-2.84935	-2.52264	-1.76462	-1.90995	-1.60833	-2.57443	-3.87969	-3.41142	0.602866	0.00127702
SLC2A5	yes	no	-2.43835	-4.78041	-4.14949	-2.33521	-4.12061	-4.325	-4.73135	-2.15473	-4.35522	-4.3324	-4.40504	-4.01157	-1.83859	-4.2892	-3.00736	-4.10686	-4.10112	-4.22154	-0.285342	-3.90168	-1.32816	-4.67851	-4.24969	-4.72207	-3.55779	-4.03731	-2.75151	-0.88184	-3.99474	-4.19138	-2.88631	-4.45002	-3.90459	-4.13361	0.341451	0.560581
TGM1	no	no	-1.48917	-1.2591	-1.04643	-0.715338	-1.20615	-0.74916	-1.02395	0.16309	0.116531	-0.641982	-0.713282	-1.5759	-1.25323	1.099	-1.51736	-1.16974	-1.10469	-1.11893	0.260766	-1.34073	-1.41732	0.407285	-1.54799	-0.73247	-1.56797	-0.343762	-1.45116	0.550157	-1.50801	0.974553	0.168107	-0.813148	-1.23887	-0.992144	0.42125	0.0675263
CA4	no	no	-3.48117	-2.75985	-2.92334	-3.35446	-3.18349	-3.11806	-2.74992	-2.21068	-3.28292	-1.41456	-1.73124	-0.0021022	-3.06688	-2.24032	-1.00832	-2.4323	-3.52567	-3.12267	-2.91485	-3.1668	-1.9681	-2.64398	-2.07536	-0.46305	-1.87499	-1.77418	-2.3694	-1.32921	-2.42503	-3.03273	-3.44977	-1.61149	-2.45415	-2.97098	0.88119	0.000268117
CPN2	no	no	0.459487	0.884284	0.865477	-1.86183	-0.0286144	-1.6421	-0.323153	4.1569	4.13742	5.17967	3.43604	3.29971	2.21027	4.08987	4.72452	4.96203	-0.751283	1.19322	3.65714	2.36438	3.4939	4.83853	4.11924	2.78158	4.15391	4.5886	3.51205	5.05291	4.38478	4.67786	3.1766	4.28529	4.72498	3.66973	3.57359	0.000719702
PROZ	no	no	0.271433	1.23939	0.463091	1.14054	0.330525	-1.02738	0.407964	3.71181	4.16054	3.3883	1.18388	2.31541	4.18488	5.02938	3.03124	4.11922	1.3732	1.74916	2.51369	2.85484	4.45879	4.30386	4.6186	0.0294317	2.07078	0.865428	3.38549	0.974106	2.23508	3.09682	2.97203	-0.85525	4.25213	3.32077	2.36523	2.99952e-05
MMP8	yes	no	0.988741	0.232455	0.666943	1.58447	1.15737	1.68299	1.1018	2.85762	1.98577	3.80039	4.59075	8.87607	0.696468	1.84279	4.50727	4.89934	0.849834	2.07795	4.29301	0.667106	0.389109	2.48258	0.804346	3.7762	5.69571	5.19058	1.61247	0.856777	4.76369	3.64722	3.29362	6.21741	3.40629	2.39896	2.47529	4.66934e-05
MRC1	no	no	-2.50694	-2.25579	-2.45255	-2.86628	-2.23798	-2.51707	-1.62459	-1.75108	-0.860075	-1.55921	-3.10335	-0.907872	-2.33194	-1.24834	-1.23303	-1.25958	-1.96855	-1.97955	0.107722	-2.44797	-1.48448	-1.53593	-2.65982	-2.14481	-1.696	-0.184741	-1.85525	-0.46621	-1.0002	-1.02784	-0.475181	-2.01367	-1.21113	-1.51425	1.0706	1.49782e-05
IGHV1-2	no	no	2.93232	1.41583	1.38739	-1.18351	0.590814	-0.10665	1.82317	4.64762	4.49566	5.84535	5.40513	6.47272	4.39725	5.71255	5.21175	7.87735	3.81433	2.38964	3.07909	4.22023	1.55196	4.91844	5.99934	3.42318	6.33302	6.04715	4.99939	3.44929	6.30504	6.3102	3.69124	5.92455	4.84447	4.90671	3.50828	0.00108418
FBLN1	no	no	2.0248	2.30487	2.20045	1.6813	2.91434	1.81242	2.05536	3.85853	4.44234	4.55765	4.29955	3.51593	4.00375	3.49736	4.37736	4.70159	1.26033	2.47506	4.19756	3.64457	2.08602	4.76602	3.9093	3.25598	3.80017	4.21012	3.93318	3.63649	4.71199	3.78008	4.39509	3.80055	3.61878	4.05165	1.61504	2.54042e-06
ITGA6	no	no	-2.93846	-3.7358	-2.45915	-2.15362	-3.75054	-2.45977	-2.61715	-3.2861	-3.57059	-3.22675	-3.37962	-3.03365	-1.40024	-3.58477	-3.18666	-2.70992	-0.977769	-3.44542	-1.71445	-1.4081	-1.3682	-3.27646	-3.3137	-2.15029	-3.37415	-4.29624	-2.92943	-0.735058	-3.93354	-3.73157	-3.37572	-3.19633	-4.02005	-3.43051	0.16439	0.673968
SFPQ	no	no	-4.25058	-4.27907	-4.45293	-1.79021	-3.99603	-4.08418	-4.05873	-1.75657	-1.82801	-1.69076	-3.11615	-2.74456	-4.31479	-4.41182	-2.18946	-2.32234	-3.97117	-3.15513	-3.08305	-2.61943	-3.49286	-5.6828	-4.39004	0.0199796	-3.74657	-3.40129	-4.58	-2.86651	-4.81658	-3.20257	-3.2019	-2.4185	-2.40589	-3.49914	1.00015	0.084465
PPIB	no	no	-2.14519	-1.86635	-1.57575	-1.8017	-1.16948	-1.74933	-0.928883	0.394873	1.6211	1.63368	-0.932715	1.60332	-0.678521	1.53569	1.26297	1.63758	-2.0807	-2.00714	-0.59075	-0.77973	-1.04017	-0.658565	1.12997	1.10544	0.567841	1.69875	0.595344	-1.27495	-0.135013	0.564734	-0.277941	1.47231	0.0614638	-0.908345	1.73779	2.44579e-05
S100A1	no	no	-5.08075	-5.28247	-5.1656	-5.12558	-4.73162	-5.56264	-4.81272	-3.18263	-4.54579	-4.98649	-5.02333	-2.62751	-4.49472	-5.37807	-4.96221	-5.06977	-4.75627	-5.52929	-3.52542	-3.08814	-2.74098	-4.85633	-4.88603	-4.97576	-4.51345	-4.43923	-4.62144	-4.2946	-4.20373	-4.96575	-4.79353	-4.53929	-5.05528	-4.52449	0.473429	0.0141367
HRC	no	no	-1.71314	-0.435534	-1.74988	-0.571615	-2.52872	0.918283	-0.283288	-1.52915	-1.89496	-3.433	-3.14351	-4.38128	-1.28199	-0.840528	-2.77178	-3.25498	-0.0613726	-3.43286	-1.23417	-1.93449	-1.65936	-1.40347	-2.53427	-0.942588	-3.58765	-0.582296	-1.04494	-0.695807	-2.71251	-3.51783	-1.0851	-3.47319	-2.53685	-2.70034	-1.05023	0.118008
ME2	no	no	-3.35029	-4.00081	-3.93459	-2.95727	-3.97005	-3.44507	-4.74372	-3.43028	-3.89194	-3.51926	-3.67565	-3.00704	-4.15434	-4.19481	-1.49583	-4.62541	-4.35827	-3.64032	-4.2476	-3.88254	-3.8162	-4.06889	-3.43013	-3.54229	-4.36456	-3.86373	-3.2003	-3.66323	-4.38797	-1.17527	-3.94779	-4.05621	-3.88902	-3.23044	0.320869	0.0975949
WARS1	no	no	-3.42457	-2.66339	-3.1428	-2.43827	-3.07868	-2.56395	-3.33034	-0.205958	2.13275	1.79685	0.281021	0.512464	-2.5456	-3.33701	-0.613371	-0.251231	-3.38037	-2.08553	0.544159	-3.56356	-2.85552	-3.4836	-1.23036	-2.15274	-0.142732	-1.61151	-3.23287	-2.52439	-1.29841	-0.622937	-2.05366	1.83176	-3.00623	-1.86233	1.50789	0.00123225
RPS3	no	no	-1.4773	-1.82166	-1.20398	-0.930093	-1.55837	-0.86969	-1.35122	1.88633	2.03804	-0.378581	0.471033	-0.785837	-0.860591	-0.489944	0.0511673	-0.397314	-1.62309	-2.1476	0.694086	0.258069	0.182105	-0.281497	-1.33577	1.75931	-1.09282	0.808056	-0.401278	0.380643	-0.232626	-0.00651317	-0.501363	2.2686	0.0134467	-0.198746	1.24368	4.03512e-05
GCSH	no	no	-3.23757	-3.26198	-3.13225	-3.10866	-3.1187	-3.11814	-3.39378	0.15245	-0.9185	-3.12993	-3.58958	-2.50325	-1.06668	-1.87705	-3.1899	-3.27687	-2.2965	1.97109	0.85484	-0.952056	-3.176	3.76488	-2.85507	-1.38115	-3.80691	0.169464	-2.31986	0.539879	-1.82455	-3.60888	-2.02244	-1.64042	-0.882858	-2.1614	1.50213	0.00689776
PTPRB	yes	no	-2.5565	-2.58448	-2.68964	-2.4987	-2.50573	-2.33749	-2.76101	-1.61763	-1.62781	-1.49661	-2.58422	-2.65396	-1.41921	-2.62186	-2.45135	-2.16338	-2.69784	-2.73291	-2.75303	-2.86748	-2.4938	-1.44189	-2.74504	-2.58029	-2.52832	-2.88219	-2.08433	-2.43833	-2.56194	-2.58018	-2.26974	-2.50251	-1.983	-2.15013	0.216415	0.0430799
PTPRD	no	no	-1.85346	-2.8787	-2.89445	-0.343888	-2.88849	-0.791106	-3.4628	-1.26823	-1.83829	-2.25438	-3.45755	-3.06325	-0.418029	-0.959098	-3.21019	-3.34033	-0.400542	-2.51161	-0.74346	2.21022	-0.606752	-2.03531	-1.53172	-2.21021	-3.178	-1.74997	-1.46843	-0.754904	-3.46185	-2.86123	-4.38514	-2.43102	-1.53972	-1.62704	0.0512871	0.935359
PTPRG	no	no	0.607963	0.988198	1.14469	1.4073	0.905728	0.597857	1.61817	3.89808	4.94426	3.13854	0.912599	2.72925	2.72531	4.48658	1.12933	1.55294	-0.641426	4.34311	5.04097	2.40605	2.05433	3.60458	1.14632	1.46761	0.978673	3.64584	4.46726	3.63775	3.26083	1.53236	4.61395	2.73075	4.32776	3.00777	1.81699	6.98563e-05
PTPRZ1	no	no	0.398791	0.125223	-1.33603	-0.816291	-2.23729	0.354243	-0.354753	-0.916942	-0.192457	-2.74437	-2.17375	-3.20757	0.446236	-0.31033	-2.54284	-2.96201	0.56539	-2.86042	-0.652823	-1.09292	0.304742	-1.18323	-2.40289	-2.51502	-2.91563	-3.34505	-0.522664	0.442235	-3.28883	-2.83461	-1.28734	-2.47633	-1.73739	-1.62385	-1.01096	0.0619842
OMG	no	no	-0.362776	0.457016	-2.24388	-1.96824	-0.625498	0.797861	-0.524133	-0.0440819	-0.594591	-3.09874	-2.25171	-2.13789	-1.09207	-0.707498	-2.16786	-2.45638	0.973622	-2.03531	-0.700926	-2.55017	0.328518	-2.10389	-0.822872	-1.71414	-2.19121	-2.39282	0.335609	-0.257215	-1.93466	-1.8484	-1.20868	-1.71986	-0.16372	-0.399362	-0.691233	0.202808
AHCY	no	no	-1.59563	-0.342567	-1.39635	-0.305991	-0.904377	-0.972098	-0.791082	0.737939	1.96079	0.985477	1.49552	2.5318	-1.24047	-0.961154	0.239389	0.472592	-1.26053	0.127901	1.2155	-1.10957	-0.924432	-0.866688	0.60922	0.468726	0.709554	1.74928	-0.93412	0.189452	-0.436609	0.341517	-1.27644	2.20785	0.382504	-0.574079	1.48686	7.4719e-05
CFL1	no	no	2.81717	2.01422	1.99771	0.556635	1.5028	0.658504	1.21071	5.30038	4.97571	3.89837	6.27062	5.03538	4.70072	1.99259	5.25117	4.63615	1.58615	5.76532	5.25835	4.33894	1.77702	2.95921	2.48616	4.4829	5.03835	5.08713	2.34419	3.28066	3.46003	3.88804	3.71628	4.68647	4.52318	5.1652	2.52307	5.45283e-05
EIF4B	no	no	-4.1113	-3.6085	-3.81738	-4.68193	-3.55979	0.0805865	-4.124	-1.69361	-1.8982	-3.21662	-2.2265	-1.32485	-4.07241	-2.95477	-4.4589	-4.4675	-3.16269	-3.82741	-4.51049	-4.19224	-2.00863	-3.35969	-4.15962	-0.543847	-4.27621	-4.23625	-4.13658	-3.59869	-4.29195	-4.26728	-4.8219	-1.00832	-4.81979	-5.1645	0.248536	0.779793
LAMA2	no	no	-3.52517	-2.17296	-2.46256	-1.95049	-4.16646	-1.61969	-3.87224	-3.2357	-2.83111	-2.3256	-1.47313	-5.22528	-2.20362	-1.33318	-4.19596	-3.91596	-1.52286	-2.86744	-2.5003	-2.70892	-1.86722	-2.22894	-2.41989	-1.84819	-3.9092	-2.61593	-2.92685	-2.28904	-3.85423	-3.59968	-2.56899	-5.05938	-1.87044	-3.31715	-0.0554337	0.92095
FCAR	yes	no	-3.77047	-3.29482	-3.93896	-3.64051	-3.77511	-4.00117	-3.28854	-4.27871	-2.62645	-3.41811	-0.905907	1.68841	-3.86614	-2.51986	-1.45409	-1.18894	-3.89542	-2.42507	-3.18973	-3.53998	-4.70471	-2.72397	-3.93512	0.875144	-0.768105	-0.819631	-4.35418	-3.82361	-1.45642	-0.666954	-1.38774	-0.19391	-3.70522	-4.58393	1.5356	0.000446644
PRTN3	yes	yes	1.58557	1.50228	-0.962191	0.847758	1.43841	5.76886	0.656098	3.82143	4.41118	3.26405	5.17079	9.83863	3.00992	3.99128	5.97714	5.53054	-1.40652	1.01513	3.88576	2.06965	1.09499	3.18019	1.3264	5.84825	6.24182	7.15681	3.51729	1.70386	5.4724	4.64489	4.43771	8.83953	3.3951	3.98048	2.1902	0.0314445
GPT	no	no	-4.18515	-2.76838	-3.10439	-3.161	-3.45969	-2.27309	-3.53721	-2.08353	-0.83651	0.793697	-3.36634	-1.13962	-3.40546	-1.44677	-2.82383	-2.4441	-2.97397	-2.79696	-2.69923	-2.76571	-3.44692	-1.95937	-1.14045	-4.44911	-1.5792	-1.61515	-2.84915	-1.87937	-3.32465	-1.2709	-2.77576	-1.77118	-1.22612	-2.80782	0.781574	0.00984449
CRHBP	no	no	-4.17991	-4.01835	-4.4055	-4.54969	-4.24481	-4.55083	-4.92059	-4.41533	0.122957	-4.24305	-3.59813	-3.23004	-4.52309	-2.85311	-4.34186	-2.45432	-4.6095	-4.30232	-1.5329	-3.4669	-4.50105	-3.6174	-4.85225	-2.34364	-3.8078	-2.99788	-4.77497	-3.27486	-3.56466	-3.95701	-0.940722	-0.383297	-4.83393	-4.60298	1.09015	0.00632129
EEF1B2	no	no	-3.68433	-3.72811	-3.9329	-0.94342	-4.22975	-3.07865	-3.2061	-0.260287	-0.444421	-1.90733	-2.23786	-2.12938	-3.40436	-4.52313	-1.46391	-2.32137	-3.11127	-1.30818	-2.35415	-2.84086	-3.77219	-3.44586	-4.03038	-3.84253	-2.07867	-1.09045	-3.20365	-2.21909	-3.01113	-1.87071	-4.10061	-0.920374	-1.90736	-1.86534	1.01875	0.0857255
IGFBP6	no	no	-1.48602	-1.84902	-1.99982	-2.78073	-2.24006	-2.19264	-2.38744	-0.431589	0.864525	-0.59037	-0.54504	-0.74685	-0.35832	-0.0188042	-1.52331	-0.796235	-1.38633	-1.52359	0.324592	3.08966	-1.98539	0.248162	-1.40187	2.91224	-0.972279	-0.00833028	-0.192523	1.13027	-0.395769	-0.584321	2.56472	0.748839	-4.32523	-0.621243	1.89878	7.34937e-05
IGFBP5	no	no	-1.13844	-1.44735	-1.70474	-1.50388	-1.54825	0.674022	-1.83151	0.118159	0.499091	0.0229734	-0.359832	-0.692675	1.05523	0.943869	-0.0836881	0.420324	0.14215	-2.54714	-0.568839	1.52699	0.185274	0.252147	-0.630959	3.08607	-1.72985	0.184977	0.26517	1.82188	-0.826307	-1.65628	0.830329	0.318221	-0.456014	-1.55726	1.19412	0.0170072
ACP1	no	no	-3.05999	-2.69862	-3.14309	-2.37668	-3.12137	-2.57308	-2.66147	-0.371657	-0.682031	-1.3677	-0.759726	0.0983882	-2.4597	-2.48119	-2.00076	-1.60895	-2.64683	-1.74105	-0.499151	-2.48203	-2.06984	-2.50797	-1.53983	-1.09099	-0.376315	0.416394	-3.20106	-2.26834	-2.18433	-1.86525	-1.63909	-0.756592	-2.28009	-2.68676	1.17024	1.19452e-05
ACAT1	no	no	-4.1092	-4.5227	-3.60179	-4.0663	-4.17717	-3.65496	-3.26326	-3.95269	-2.14043	-1.88625	-2.73736	-4.19792	-4.03801	-2.77243	-3.78863	-4.10859	-3.99643	-4.20597	-1.26419	-3.68955	-4.00173	-2.39503	-3.82531	-1.83877	-4.10184	-0.744772	-3.67089	-0.860076	-4.36159	-3.82042	-3.49184	-0.488152	-3.11956	-2.44429	0.669365	0.0394972
TNC	no	no	-1.17841	-0.131484	-1.35025	0.247013	-1.25857	-0.110824	-1.15473	-1.004	-0.166378	-0.58256	-1.15162	-1.45603	0.208986	0.0265677	-1.08352	-0.709533	1.01884	-1.61566	-0.825268	-1.00558	0.120202	-1.22687	-1.19122	-0.88733	-1.06735	-0.602515	-0.884825	-0.24249	-0.186343	-0.290007	-0.38023	-1.10492	-0.69924	-1.6425	0.153276	0.710446
DNASE1	no	no	-0.739082	-1.06154	-3.54302	-0.670466	-2.70691	2.62326	-1.0143	5.46273	5.78737	5.49843	1.06167	4.09052	6.10132	6.64517	0.136202	3.777	4.82883	3.63901	5.77063	3.36778	4.84015	4.57891	6.24621	0.562252	3.43532	3.25604	4.9875	5.46813	4.76839	4.42171	5.47706	3.48826	5.17145	4.51943	5.36369	0.000401651
F2R	no	no	1.22112	3.50575	-1.47634	1.27515	1.59193	2.66672	2.86583	3.0195	0.680067	0.524715	-1.1664	-1.73481	3.3107	1.52806	-1.4233	0.0307087	5.70321	2.2397	2.69375	3.23051	4.4594	1.05084	0.69316	1.34316	-3.12639	0.822657	2.28319	2.72556	-0.377848	-2.2598	2.35859	2.33169	1.33389	-1.15888	-0.540717	0.547249
MPZ	no	no	-2.49348	-2.78515	-2.47611	-3.85069	-3.30385	-2.42842	-3.02522	-2.34909	-0.675382	-2.93766	-2.98408	-3.08335	-1.47207	-1.74729	-2.58198	-3.17559	-2.74739	-2.3834	-1.28236	-2.38	-2.92318	-2.38402	-2.60023	-2.85814	-2.70606	-1.73013	-0.985004	-0.430848	-2.85264	-2.60861	-0.747713	-3.07657	-3.2418	-2.81061	0.709546	0.00553424
MCM3	no	no	-2.95847	-3.37776	-3.25028	-3.22423	-3.08795	-1.76345	-3.18794	-2.33199	-2.8378	-2.77878	-2.8929	-2.89805	-2.82412	-3.11944	-3.07268	-2.94565	-3.38699	-3.25617	-3.20421	-2.86999	-1.44467	-3.16072	-2.89618	-3.19264	-2.8637	-3.11124	-2.59416	-2.14961	-2.74582	-2.95281	-2.93797	-2.72233	-3.19774	-3.22225	-0.178721	0.378664
AZGP1	no	no	2.67757	2.39217	2.09892	2.4966	1.58386	3.3858	0.92526	9.22933	11.1785	8.97647	7.91696	9.37268	8.49889	9.46596	8.24509	7.69806	8.00604	11.1242	10.7164	8.71065	8.77129	10.2548	6.32779	7.17199	6.5051	9.19826	11.0695	9.32183	8.07094	4.93261	10.3126	8.09428	9.96087	8.21528	6.33777	4.45638e-07
MPST	no	no	-3.67298	-2.987	-3.73164	-3.09454	-3.30061	-2.46482	-3.75303	-1.82763	-0.273322	-1.27205	-2.2025	-0.848494	-3.7236	-1.85273	-1.33198	-2.09025	-2.13725	-2.06503	1.09354	-3.16235	-3.4344	2.13452	-2.04356	-2.34416	-0.401091	1.19145	-3.08595	-0.771218	-1.14045	-1.55223	-0.177163	-0.709818	-1.01693	-2.97382	1.50183	8.54626e-05
RPS12	no	no	-2.78337	-3.12078	-3.2425	0.663312	-3.38529	1.21434	-2.25306	0.604321	0.0279204	-1.21013	-0.00510871	-1.72945	-1.62055	-2.58616	-0.289496	-1.94577	-2.50713	-2.54712	-1.67109	-1.56561	-2.56948	-2.02893	-3.19396	0.0359422	-1.83215	-0.784869	-2.00246	-2.11053	-2.97368	-2.35402	-3.25267	0.129108	-1.47913	-0.204505	0.148818	0.874209
DNAJB1	no	no	-3.58898	-4.05766	-3.6333	0.710085	-3.75092	-1.92818	-3.99626	-0.957679	-1.33331	-2.24523	-2.80858	-2.6157	-3.39208	-4.19681	-1.79682	-3.91239	-3.48769	-2.14864	-2.94603	-2.87475	-4.02798	-3.48465	-3.94513	-1.06679	-2.23231	-2.56673	-3.94962	-2.68586	-3.31175	-3.56389	-3.71897	-1.35725	-2.90284	-2.49734	0.0491681	0.959038
ATP5F1A	no	no	-3.45897	-3.76718	-3.46624	-2.86288	-3.02337	-3.17215	-3.86268	-1.9476	-2.31573	-2.97113	-2.50985	-3.65485	-3.50939	-3.54066	-1.91788	-3.5624	-2.76451	-3.20924	-2.04766	-1.63638	-2.51051	-3.4604	-3.1478	-0.377211	-3.68926	-1.63871	-2.16382	-0.195965	-3.13439	-4.1454	0.303848	-1.90772	-2.71213	-2.17284	0.736839	0.0226033
MT3	no	no	-5.47114	-4.79133	-5.3466	-5.28669	-5.22956	-5.10118	-5.57993	-5.65397	-4.35672	-5.09911	-5.60856	-5.41514	-5.2244	-5.32882	-5.74195	-5.43389	-3.38753	-5.825	-5.17504	-5.59009	-3.7903	-5.36876	-5.47684	-5.56839	-5.39989	-5.38597	-4.88843	-4.15845	-5.03455	-4.88181	-5.11305	-5.01353	-5.19966	-4.81699	0.169935	0.170704
CTSS	yes	no	-2.13159	-2.25772	-1.48801	-2.78599	-2.0317	-1.89563	-1.98399	-1.28425	0.352861	0.137167	-0.295215	2.86636	-1.03156	-1.93863	0.931908	0.179488	-1.52687	-2.83763	0.816468	-0.932196	-1.60626	-1.00163	-0.916605	2.68765	-0.47557	-0.106949	-1.28252	-0.109909	0.168227	-0.257704	-0.103131	0.133088	0.353299	-1.45668	1.64655	1.34816e-05
PSMA1	no	no	-2.90663	-2.61104	-2.3501	-2.67878	-2.07411	-2.16575	-2.39118	0.0638676	0.712719	0.304625	0.755511	1.84894	-1.18938	-4.0391	0.0552677	-0.770331	-2.58124	-0.502274	0.466536	-1.50553	-2.21516	-1.56321	-1.21841	1.45672	-0.203968	1.09449	-1.30866	-2.50858	-0.61978	-1.09256	-2.12093	1.08895	-1.90659	-1.60879	1.7321	0.000143989
PSMA2	yes	no	-3.16459	-2.70404	-2.7858	-3.16273	-3.23413	-2.76808	-2.72374	-1.31339	-0.28295	-1.13246	-0.354773	0.891272	-2.93399	-3.87272	-1.26682	-1.54251	-3.43948	-1.75482	-0.689685	-3.60984	-2.44846	-3.9329	-2.38336	0.166142	-1.46121	-0.103362	-2.91375	-3.66073	-2.73377	-0.873535	-2.4248	0.626242	-1.96406	-1.72651	1.19171	0.000377723
PSMA3	no	no	-2.4217	-2.57214	-3.10829	-2.01381	-2.99837	-2.94563	-2.1679	-0.0746591	0.510203	-0.815617	-0.39329	1.0046	-2.64998	-2.83576	-1.02891	-1.34441	-2.22392	-0.759225	0.0972284	-3.10499	-2.41719	-2.49428	-2.16863	0.662592	-1.45836	-0.136769	-2.57886	-2.12315	-1.52286	-1.82901	-2.29658	0.832973	-1.24502	-1.01525	1.53592	8.10097e-05
PSMA4	no	no	-2.58284	-2.03645	-2.34717	-2.58408	-2.54444	-2.05556	-2.3099	0.645429	0.886672	-0.0874157	0.73578	2.0888	-1.71203	-4.58343	-0.348627	-0.272148	-3.42696	-0.928357	-0.0567079	-2.15784	-2.31104	-1.83281	-1.47775	0.882425	-0.97336	0.561223	-2.66188	-2.88505	-1.71109	-0.547781	-1.93098	0.894575	-1.31515	0.426569	1.92702	1.83126e-05
S100P	yes	no	2.82522	2.90961	3.02645	3.11816	2.75467	1.50507	2.8372	5.70549	5.94374	4.35742	7.12656	6.45223	4.52085	1.84557	5.66674	4.36843	2.9188	4.08245	4.27048	4.65034	3.75323	3.33972	2.78841	7.36721	5.44849	5.81787	4.42085	3.90745	3.22931	3.09003	3.58654	7.12714	4.59888	5.72921	1.63906	0.000192193
COL5A3	no	no	-0.211355	-3.07582	-3.85494	-3.41188	-3.90459	-3.01695	-3.63097	-0.519468	-1.52124	-2.01813	-2.84347	-5.12729	-0.425448	-0.825132	-3.07099	-2.26453	-3.93035	-2.74083	-1.19498	-0.649678	0.253043	-0.447701	-0.908857	-5.22386	-4.17355	-3.04057	-1.57504	-1.51365	-1.64366	-1.52495	-1.31207	-3.78047	-0.551236	-0.729095	1.38713	0.0824368
CD40	no	no	1.30626	1.99467	0.958519	1.63916	0.399748	2.73946	1.50449	1.01071	2.80381	1.45435	-0.0390493	0.136995	3.11333	2.53153	-1.28722	-1.78995	2.39327	-0.351222	3.28511	1.30547	2.20831	0.279921	1.1233	2.15539	-0.660841	1.7088	0.897379	4.09851	-0.623703	-0.678248	2.34636	0.363799	2.78502	1.49704	-0.318333	0.510052
ITGA3	no	no	-4.93582	-5.33218	-5.48488	-5.0616	-5.33945	-5.26665	-5.84509	-4.09742	-4.9764	-3.46243	-5.84109	-3.14131	-5.03821	-5.00299	-5.02246	-5.35607	-5.69612	-5.31234	-3.9611	-5.16382	-1.78205	-4.88885	-4.37832	-3.3012	-4.42669	-5.5231	-5.66164	-5.12936	-4.89059	-3.47005	-5.82801	-5.41852	-3.19092	-5.11615	0.671095	0.0100853
PTX3	yes	no	-2.88197	-2.7843	-2.79894	-2.20002	-2.37693	-2.97798	-2.75041	-0.595074	-1.66275	0.263448	-0.257077	1.6928	-2.64386	-3.10094	0.111043	1.61164	-3.24615	-1.89265	0.31745	-3.11266	-2.36701	-0.437584	-2.36124	-2.69543	0.703377	0.783345	-1.99287	-3.873	1.34911	1.70271	-0.51343	2.44478	-1.40547	-2.4383	1.59298	0.000531738
MSN	no	no	-0.536097	-0.707665	-0.259731	-0.250764	-0.112747	0.830019	-0.724773	1.06128	1.64197	0.917388	3.97386	3.49388	0.546221	-0.0631481	2.69529	2.17099	1.07191	2.06972	1.44845	0.689711	1.52917	-0.190952	0.225591	4.12473	1.85077	2.04052	-1.15369	0.618507	-0.108728	0.826354	0.807493	3.60817	1.12671	0.849723	1.57361	8.90552e-05
DDX6	no	no	-3.49336	-3.08153	-3.64425	-3.45837	-3.15491	-3.85357	-3.30297	-1.50757	-2.66194	-2.92123	-1.25177	-2.58549	-3.63411	-2.74373	-1.08428	-3.03171	-3.18513	-3.20435	-1.7663	-3.68918	-3.53557	-3.17482	-2.99057	-3.56062	-2.93424	-2.78779	-3.19108	-3.20167	-3.20705	-3.40004	-3.38621	-0.640726	-3.7353	-3.22525	0.488703	0.0207948
U2AF2	no	no	-3.94847	-4.30869	-4.00854	-2.58989	-3.38612	-2.82436	-3.44492	-0.457452	-1.08356	-1.93383	0.539088	-0.364696	-3.53299	-4.43766	0.179233	-1.73779	-3.5418	-1.87229	-0.965545	-2.88305	-1.86683	-2.73417	-3.98599	-2.65155	-0.88441	-0.389426	-3.24377	-2.81545	-3.18223	-3.82842	-3.05023	0.874135	-1.84824	-2.33907	1.56478	7.11544e-05
RPL13	no	no	-4.65669	-4.96191	-4.9961	-4.74471	-4.2917	-2.1702	-4.88533	-0.708953	-2.07824	-3.82103	-2.39118	-4.75894	-4.45533	-2.61617	-4.84956	-2.29177	-4.3056	-5.45818	-3.72166	-4.0152	-4.86446	-3.5891	-4.87297	-2.6613	-4.68668	-3.71798	-4.58117	-3.67352	-4.42774	-3.41857	-4.3553	-5.04166	-3.4162	-2.11945	0.677582	0.19681
S100A4	no	no	-1.68924	-0.998553	-0.170116	-3.12599	-0.956539	-0.55246	-1.25875	3.5028	2.27038	2.75575	4.42125	4.68875	2.46916	0.58378	3.96116	2.99893	-0.738377	0.421235	3.17684	1.5217	-0.710452	1.32473	1.57876	4.4924	3.17213	3.94778	0.573426	0.307285	1.56796	1.51325	1.9557	5.10299	2.80687	3.71974	3.414	3.91525e-05
MGAT1	no	no	-2.68761	-1.42339	-2.84476	-1.30018	-3.37877	-1.54466	-3.35599	-0.560758	-0.752475	-0.376012	-3.18627	-2.22441	-1.78927	-0.322218	-3.36487	-3.3091	-1.94878	-2.91078	0.296453	1.22388	-2.03705	-1.507	-2.73885	0.683979	-2.80203	-0.0283179	-0.715519	1.89861	-2.17979	-2.92278	-1.63399	-0.611438	-0.619865	-0.468079	0.939602	0.0422014
HMGB2	no	no	-2.17851	-2.01556	-1.95988	-1.29234	-1.1506	-2.30829	-1.39252	1.05805	0.017773	1.4674	4.42218	2.77939	0.814262	-1.29322	1.83809	2.2931	-2.17562	0.91255	-0.374026	0.535859	-1.50802	-0.598835	-2.10971	4.81857	1.22165	1.54087	-2.9605	-2.38941	-2.37414	-0.167571	-0.722172	1.53924	1.33869	2.3838	2.44936	2.83558e-05
PTBP1	no	no	-3.60609	-4.03363	-3.97436	-3.52898	-4.1373	-3.34058	-3.91259	-2.6699	-1.92308	-2.7328	-2.55619	-1.36169	-3.86376	-5.00612	0.064615	-1.33442	-4.1495	-3.9929	-3.03525	-4.3521	-2.22325	-3.27297	-4.07463	-1.63922	-3.41979	-2.03628	-3.25036	-2.20783	-2.65393	-3.6361	-3.96751	-0.825331	-3.21228	-2.4769	0.912303	0.00453774
TARS1	no	no	-4.51637	-4.67785	-4.15461	-4.21608	-4.57832	-5.22105	-3.78771	-2.99298	-2.57301	-0.0659154	-2.52507	-1.575	-4.28152	-4.78882	-1.5199	-2.7228	-3.60688	-3.14837	-3.27019	-4.08164	-4.50781	-4.52699	-4.46373	-4.54746	-3.17823	-3.68718	-4.19487	-5.17626	-5.04282	-5.1355	-5.29582	-1.17349	-5.12633	-4.2142	1.06022	0.0076949
VARS1	no	no	-5.07325	-4.78566	-5.1502	-4.67149	-4.85729	-4.25547	-4.66198	-3.77533	-4.13083	-5.05538	-4.95217	-4.74055	-4.76675	-4.71904	-3.30876	-4.75145	-4.67635	-4.74843	-5.42214	-4.85775	-4.92713	-4.94595	-4.67275	-4.50091	-4.86975	-4.62625	-4.45987	-4.90933	-4.64187	-5.24357	-4.8842	-2.01425	-4.89662	-5.15261	0.0605237	0.776993
EEF1G	no	no	-2.33369	-1.32927	-2.90224	-2.35602	-2.5067	-2.19395	-2.64199	0.742238	0.945065	-1.34865	-1.33473	0.556195	-3.4993	-1.71889	0.935359	0.116877	-2.59617	-0.251123	-0.242168	-1.52689	-3.22556	-2.4479	-1.79372	-2.19209	-0.0224036	0.154623	-1.40671	-0.531685	-0.990448	-1.26854	0.188816	2.49619	-2.89308	-1.92731	1.65695	0.000442672
KLRK1	no	no	-1.28613	-1.6918	-2.74748	-1.47328	-2.15701	0.00936536	-2.07333	0.0692309	0.114591	-0.600215	-2.11273	-3.74448	0.867731	1.01418	-2.57844	-1.86652	0.514979	-1.5078	0.670596	-1.09229	-0.277359	-1.88603	-1.57463	-1.6076	-1.95642	-1.40757	0.412935	0.926958	-1.81324	-2.74676	-1.46058	-1.65795	1.06555	-0.618982	0.655545	0.177924
CD27	no	no	5.9192	5.57965	3.91717	6.20156	2.78589	6.59061	5.08206	5.31788	5.4462	5.09036	1.88972	3.52042	6.84838	5.74411	1.15158	2.91344	6.47183	3.79946	5.31701	5.49189	6.85815	4.69776	4.30764	5.1156	2.68407	3.79456	5.4296	5.6367	3.75016	3.37329	4.85603	3.13291	5.89983	5.15648	-0.572435	0.414554
FKBP2	no	no	-2.36942	-1.86135	-2.56501	-2.45457	-1.0192	-1.9724	-2.08358	1.50148	0.888295	0.293046	-0.601316	-0.25208	-1.65236	-1.56468	-0.138508	1.10339	-2.19668	-2.3825	-1.53893	-1.81649	-2.88631	-1.59073	-2.40878	0.634564	-0.03195	0.264605	0.0750378	-1.0987	-0.504278	-0.224805	-2.14919	1.41865	-0.809955	0.879969	1.41406	6.98563e-05
MST1	no	no	-1.22321	-1.36386	-0.677207	-0.956039	-1.25822	-0.851572	-0.69503	0.625289	0.0437255	-0.169024	2.19312	1.82317	-0.944793	1.0318	1.93571	2.22062	-0.863929	-1.24878	0.34351	-0.790528	-1.31453	-0.596861	-0.552849	-1.44657	1.57309	0.419717	0.721338	1.14284	1.77497	1.73368	0.327263	0.424422	-0.596887	-0.822791	1.44753	7.80704e-05
CNTFR	no	no	-1.34332	-1.42393	-0.407854	2.22888	-1.17033	-1.84773	-1.06038	2.70089	1.87283	2.22014	-1.53093	0.427248	3.10514	3.00846	-1.8761	-0.258626	2.00961	0.338978	2.26742	0.640022	-0.0270012	1.25493	0.847139	-0.489626	0.0732593	0.686874	1.91606	1.86813	1.74371	0.354081	1.8411	-0.790778	2.6141	1.89668	1.45292	0.0372565
STOM	yes	no	-2.12693	-2.11797	-1.76108	-3.39797	-1.85297	-0.648647	-2.2849	0.0502864	0.39244	0.590495	-2.43347	1.25834	0.355344	0.451632	-0.943358	-0.947899	1.47339	0.106116	0.603628	-1.95069	1.4606	-0.104524	0.654434	0.711914	-1.02915	-0.28591	-0.650341	2.34715	-0.125386	0.212492	-0.00371756	1.00548	1.57243	-1.28254	2.03637	0.000610452
PON1	no	no	1.86815	0.50823	0.529426	0.00143887	1.56557	0.49304	-0.00585401	4.9885	3.22096	5.11886	5.62875	3.60162	2.17553	2.91276	6.89225	6.88306	-1.82862	0.574275	1.21264	2.99394	0.611295	6.35432	5.23886	-0.027161	5.88336	3.42688	3.69186	1.60997	6.33858	6.47888	3.13252	4.62364	4.84128	4.0724	2.88985	1.19268e-05
YWHAQ	no	no	-3.00535	-2.3459	-2.84746	-2.39525	-2.64322	-1.83084	-2.71672	0.314061	0.363623	-1.1911	-0.502584	-0.759162	-3.06363	-2.49299	0.438977	-0.568049	-1.97263	-0.562519	-1.67673	-1.98111	-2.51023	-2.06942	-2.19439	-1.68422	-1.08011	-0.254413	-3.2732	-0.999713	-1.2035	-1.67413	-2.19352	1.07537	-1.20631	-1.57205	1.31925	7.3155e-05
CALML3	no	no	-3.03003	-2.8041	-2.40151	1.23043	0.362985	5.14445	-2.35973	-1.47777	1.49774	0.377349	-0.811052	-2.49394	-1.95428	0.835174	-2.95531	-2.71885	-0.921601	-2.01493	0.810015	0.515369	1.59867	0.731905	-0.185784	-2.52723	-2.79591	-2.26648	-0.428656	-1.96915	-1.22473	1.55935	-1.72988	-3.20175	-1.47425	-1.49259	-0.478067	0.748359
DPP4	no	no	0.81363	-0.092268	0.59333	0.00668353	-0.480088	0.185882	0.173595	2.24136	2.83506	2.56328	-0.788703	2.80489	1.1342	2.60534	1.05923	0.16493	0.295339	1.37834	3.39012	1.9397	1.1852	2.58504	2.26144	2.26182	-0.0818396	1.87467	1.35407	4.75113	1.2988	0.57272	2.9495	2.30576	4.33654	0.894593	1.44921	6.46803e-05
RPA1	no	no	-2.55366	-2.62094	-2.44818	-2.61799	-2.3324	-2.23169	-2.39865	-0.878616	-2.22338	-2.13582	-2.38346	-2.60383	-2.26	-2.51135	-1.09609	-2.14146	-2.6932	-2.42889	-2.32631	-2.38834	-2.3502	-2.34745	-2.20215	-2.44091	-2.02711	-0.94393	-2.1661	-2.49836	-2.63812	-2.54001	-2.77151	-2.084	-2.28367	-2.36199	0.273188	0.0250489
APEX1	no	no	-2.95275	-2.62246	-3.06735	-3.2149	-3.33472	-3.63023	-2.30333	-0.350727	0.461486	0.173118	1.69271	2.12414	-2.84863	-3.28221	0.778508	1.56265	-1.81402	-3.11686	-0.666296	-2.88362	-3.70209	-3.27001	-0.636977	-0.371177	-0.182758	0.438738	-2.73805	-3.23576	-1.83959	-0.977273	-1.1621	2.32175	-1.1819	-2.10048	2.14317	0.00041769
CD82	no	no	-4.04712	-4.41372	-4.11437	-4.57912	-4.25271	-4.07397	-3.95541	-1.75758	-3.99042	-2.54311	-2.97666	0.834461	-2.95253	-4.93749	-0.839309	-3.67302	-3.82916	-4.3997	-2.43619	-3.99207	-2.56439	-4.0774	-2.49386	-3.58863	-4.29769	-1.96849	-2.97499	-2.30778	-3.31426	-2.18048	-2.2981	-2.25414	-1.41229	-4.54692	1.30465	0.000105346
CALR	no	no	-0.226291	-0.843887	-0.0701304	0.506331	0.184338	-1.43525	-0.429784	2.09575	4.01831	0.659011	-0.741445	1.32364	0.302073	0.209316	1.60958	1.505	0.496451	2.37764	2.26831	0.921513	1.61063	2.59915	0.255501	2.72819	-0.26751	2.96276	1.4709	1.77394	0.757537	0.44165	3.64463	2.04572	1.70594	0.0888257	1.88082	0.000162208
MAP4	no	no	-1.63248	-2.03876	-2.44115	-0.783473	-1.89604	-0.953767	-2.11472	0.257829	-0.56691	-1.49506	-0.00763694	-2.4628	-2.4646	-2.00727	-2.31445	-1.72862	-1.7061	-0.688256	-0.634511	-1.33513	-1.48641	-2.13579	-2.04797	-0.271875	-1.1336	-0.789938	-1.94981	-0.238891	-2.43082	-2.01573	-2.12982	-1.15831	-0.817157	-0.213085	0.316309	0.339823
CANX	no	no	-0.0702312	-0.602466	-0.625197	-0.32192	-0.746119	1.15587	-0.797197	1.44838	2.60018	0.450118	-0.869606	0.316612	-0.415261	0.530261	-0.0849341	-0.0861113	-0.020801	0.376249	2.10771	0.564701	-0.502569	1.62049	-0.774101	1.8871	-0.760535	2.11861	1.14125	1.55103	-0.121961	-0.647589	2.33856	1.25163	0.955902	-0.517444	1.12172	0.0132157
CFP	yes	no	-2.1804	-1.20848	-0.249998	-1.37956	-1.62055	-1.39579	-1.31417	-1.09077	-1.77578	2.50757	2.72285	3.21334	0.243956	0.64046	1.85734	2.53183	-1.81546	-1.21659	-1.47271	0.107769	-0.885391	2.27346	1.88476	1.31504	-0.176668	1.26	0.180282	-0.212097	1.09253	0.49732	-0.419773	1.15814	-1.78219	0.876655	1.35731	0.000700199
IL1R2	no	no	-2.35341	-3.3126	-3.05859	-2.89691	-2.56729	-3.08357	-2.78393	-0.480298	-0.638945	-0.880441	-3.80079	-2.97671	-0.381433	-0.532302	-2.77885	-1.52553	-0.348457	-1.08795	-1.2608	-2.72968	-0.37102	-0.74242	-1.62975	-3.77817	-2.48784	-1.0923	-0.6072	-1.27231	-1.80561	-1.66817	-1.60772	-2.91402	0.680706	-1.89289	1.44947	2.09127e-05
PSMB8	no	no	-2.7475	-3.62382	-3.09777	-3.74858	-2.60797	-3.19398	-3.30227	-1.95244	-1.33469	-1.13722	-0.371899	0.700585	-3.81574	-3.42722	-0.407293	-1.57161	-2.96064	-3.19673	-1.91862	-3.27251	-3.62181	-3.12855	-2.9494	0.743838	-1.95305	-1.16775	-1.92139	-3.3253	-1.72711	-1.99141	-3.54688	0.319574	-3.51898	-2.53236	1.27339	0.000853785
PSMB9	no	no	-2.62038	-3.18783	-3.25491	-3.00224	-3.64775	-2.67176	-3.14385	-1.04501	-0.691363	-1.23814	-0.607297	1.03604	-2.57182	-2.81507	-0.564538	-1.75495	-2.94309	-2.60817	-0.727797	-2.95723	-3.31515	-2.5827	-4.3583	0.111561	-2.42313	-1.49764	-3.49128	-1.9055	-1.71688	-2.23033	-2.96131	0.341213	-2.5243	-1.61639	1.46499	0.000148197
PSMA5	yes	no	-2.17636	-2.58757	-2.91327	-2.03504	-2.63498	-0.721542	-2.92991	-0.330257	-0.00664575	-0.85041	-0.473507	0.792458	-1.80299	-4.11249	-0.828722	-1.82213	-2.58966	0.0577564	0.397204	-2.26027	-2.60151	-2.43792	-2.23441	-0.353459	-1.44201	-0.482754	-3.00361	-1.19152	-1.64489	-0.841817	-2.26316	0.24563	-1.25141	-0.967092	0.930592	0.0361306
HLA-DMA	no	no	-3.90577	-3.25851	-3.54061	-3.50171	-3.64217	-3.55939	-3.50615	-4.20745	-2.81299	-2.04156	-3.44845	-2.78747	-2.49897	-3.04795	-3.70029	-3.64125	-2.23267	-3.3689	-2.82313	-3.83757	-1.50784	-2.86623	-3.16606	-2.14442	-4.08923	-2.51432	-4.05742	-0.930234	-3.4702	-3.32134	-3.73495	-3.43667	-0.593133	-3.57649	0.629871	0.00547053
HLA-DMB	no	no	-3.46921	-3.69945	-3.70543	-3.46038	-4.27762	-3.78556	-3.67611	-1.96673	-3.15742	-4.02532	-4.09899	-4.55315	-3.02742	-3.5976	-4.01086	-3.90957	-1.95992	-3.71349	-3.20835	-3.91894	-1.74378	-1.75582	-3.37486	-1.71598	-3.68706	-3.12324	-4.0409	-1.39779	-4.04904	-1.9434	-3.72294	-2.75999	-1.25463	-3.60062	0.795172	0.0110124
PSMB4	no	no	-3.12375	-3.27636	-2.17265	-2.4975	-2.97207	-2.93739	-2.90516	-0.522149	0.439878	-0.291995	-0.0773889	1.61263	-2.39163	-3.60596	0.0546206	-0.359728	-3.52531	-0.733953	-0.104328	-2.82981	-2.36773	-2.29647	-1.60359	0.521275	-1.04264	0.085752	-2.73261	-2.26789	-1.47814	-1.74298	-2.12599	0.797949	-1.53107	-0.620037	1.42744	0.000167073
PSMB6	no	no	-2.21021	-2.32388	-2.39188	-1.87845	-2.78284	-2.79576	-1.97336	0.764132	0.582037	-0.00810104	-0.205346	1.12298	-1.7791	-2.01214	-1.00824	-0.49169	-2.82335	-0.891081	-0.807469	-1.50854	-2.1794	-0.196148	-1.72166	0.165016	-0.369551	0.711405	-2.44418	-1.04391	-4.00367	-1.13712	-1.85958	0.0793736	-0.798828	0.65078	1.56318	1.87863e-05
PSMB5	no	no	-4.0265	-3.4113	-3.61089	-4.02031	-4.12359	-3.91589	-3.72952	-3.1027	-1.5228	-2.12966	-3.40325	-1.3895	-3.67504	-4.14554	-1.71795	-3.81764	-3.73709	-3.84935	-2.61638	-3.54437	-3.71207	-3.53924	-2.90573	-1.92663	-2.54527	-0.593438	-4.17022	-3.7999	-3.0205	-1.59972	-4.13721	-2.28034	-3.14639	-2.55676	0.838764	0.00122758
GSTM2	no	no	-3.16804	-2.9453	-2.94026	-2.45794	-3.14731	-2.80276	-2.97594	-1.23687	0.394188	-2.04669	-1.55227	-1.17727	-2.19969	-0.592277	-1.32392	-2.66585	-2.90228	-2.59838	-1.8622	-2.99954	-1.86181	-0.911441	-1.73617	-3.30204	-2.25676	-1.81134	-2.72432	-3.00274	-1.27324	-2.65786	-1.9753	-1.28511	-1.47014	-2.57054	0.877822	0.00153985
LOX	no	no	0.468951	0.264012	0.179399	-0.349992	-0.0323515	0.448873	0.59691	2.15409	0.303657	-0.114467	0.565838	0.186882	1.07342	1.04845	0.280388	0.768747	0.00669151	0.741353	2.34537	3.43132	1.10293	0.917621	0.13221	4.59104	0.464215	2.36846	1.27083	4.51163	-0.148946	-0.0945818	2.08121	1.91753	0.667094	1.17443	0.686852	0.0137065
MAPK1	yes	no	-3.90219	-3.55926	-3.51102	-3.53215	-3.18454	-3.30595	-3.47136	-1.47991	-1.47909	-2.03053	-0.31892	-0.937972	-3.08582	-3.28019	-1.4885	-1.25329	-3.88823	-2.97801	-1.63339	-3.49218	-3.32277	-3.27948	-3.15429	-2.19551	-1.50028	-2.21399	-3.34397	-1.72376	-3.09735	-4.25196	-3.63723	-0.0262647	-2.90715	-4.43756	0.926738	0.000853423
GCA	yes	no	-1.24291	-1.6376	-2.12974	-1.89433	-1.40446	-1.44633	-1.91134	1.90352	1.37863	1.06651	2.68919	5.42122	0.272708	-0.859287	3.88845	3.18217	-2.45567	0.130829	1.68869	-0.414744	-3.02139	0.491241	-0.730486	-0.499698	1.59774	2.60425	-0.627973	-1.10141	0.806826	2.10005	0.727	3.91741	-0.312426	-0.087882	2.14783	6.98563e-05
GRN	yes	no	4.04447	4.32673	1.56199	4.69128	1.66146	4.88726	2.01422	3.34152	4.20564	4.03871	2.45229	4.53223	4.45631	4.97933	1.55954	3.41215	5.12536	0.758811	2.99718	3.17726	4.68275	2.98484	3.94013	4.75847	2.32119	2.76613	2.81311	3.6235	1.96594	1.04078	3.63813	3.04182	4.43669	2.84023	0.0167744	0.984382
PTPRM	no	no	-2.48847	-2.16867	-2.35095	-1.99014	-2.18234	-2.52127	-2.53485	0.114456	-0.597368	-0.544251	-2.07533	-2.64851	0.403943	0.0638735	-2.1885	-2.00925	-2.85921	-1.36262	-0.217356	-1.57511	-1.95985	-0.654533	-1.04193	-2.10366	-2.01242	-1.65076	-0.497649	-0.55138	-0.580535	-1.48784	-0.957038	-1.81654	0.9328	0.134534	1.26142	1.49782e-05
LAP3	no	no	-3.01169	-3.53777	-3.02331	-3.48813	-3.40823	-3.09777	-2.75195	-1.33561	0.320772	-0.586112	-3.01751	-0.783029	-3.33259	-2.40298	-1.79593	-1.2391	-3.02565	-3.17713	-1.15527	-2.80887	-2.69674	-1.89469	-2.84532	-3.00229	-2.28398	-1.99925	-2.42211	-2.26537	-1.19249	-1.05319	-3.01306	-0.895925	-2.01923	-2.33298	1.16605	9.4455e-05
TNFRSF8	no	no	-4.61514	-2.9892	-4.22592	-3.04268	-4.55693	-1.72132	-4.99106	-2.54757	-3.98548	-3.61543	-5.12884	-4.04745	-1.68377	-3.37854	-4.60059	-4.8903	-1.34154	-4.29219	-3.6731	-4.41223	-3.20524	-4.9678	-4.29192	-4.53358	-4.82118	-4.44147	-3.55058	-2.99631	-4.0099	-5.23808	-4.87939	-4.99703	-3.18632	-3.9855	-0.12988	0.841624
S100A2	no	no	-0.178734	-0.729469	-1.20696	-0.330643	-1.79887	-1.33901	-1.24114	4.46443	4.74527	4.17628	1.52226	2.40338	1.98759	0.96037	1.88696	1.39181	-0.68137	-1.30581	-1.5898	2.51482	0.952982	0.580017	0.282859	1.77134	-1.16431	2.08619	0.27448	4.22674	-1.83454	-0.896497	-1.21677	3.10739	-1.11192	4.52958	2.13006	6.76892e-05
TPP2	no	no	-2.89386	-3.28505	-2.66948	-2.89098	-2.98818	-3.01992	-3.13413	-2.34213	-1.98384	-2.81799	-2.11606	-1.27233	-2.76079	-2.5793	-2.23331	-2.47648	-2.5347	-2.87365	-2.90911	-2.7529	-2.7915	-2.86257	-3.17936	-3.00987	-2.72867	-1.54903	-2.78929	-2.56801	-3.14979	-2.57378	-2.46551	-0.762961	-2.48396	-2.44684	0.246728	0.0913075
IMPA1	no	no	-1.7323	-1.80216	-2.59355	-2.16267	-1.88408	-2.35485	-1.75797	-0.150256	0.411823	-0.51716	0.0571303	1.1232	-2.59873	-0.848074	-0.175538	-0.335382	-1.84462	-0.894691	-0.461002	-2.2243	-1.81886	-1.73778	-2.47098	1.04932	-1.45129	-0.0880623	-2.7408	-1.62406	-0.922584	-0.611945	-1.98317	0.589212	-0.227245	-0.520677	1.18307	0.000149689
CCN2	no	no	0.616219	2.46007	-0.358392	2.16196	-1.48099	2.16623	0.736802	1.06008	2.53571	2.57872	-0.49983	0.0100318	2.86043	1.77217	1.79447	-0.472506	2.67954	-0.237566	2.25044	3.08838	0.881555	1.08012	0.774888	4.3037	0.607821	1.81978	1.81431	2.70504	1.30335	0.179351	2.77057	1.19603	1.58495	1.33583	0.64414	0.378664
EPHA2	no	no	-2.8675	-2.30253	-2.2004	-2.08165	-2.62293	-2.42454	-2.28299	-0.81059	0.239418	0.854413	-1.17021	-0.898241	-1.33717	0.068189	0.558083	-2.42778	-0.554017	-1.57499	-0.723168	-0.605695	-0.646083	-1.22614	-0.893236	-2.09226	-3.63036	1.69235	-0.140952	0.876622	-1.20431	-1.35076	-1.03959	-1.37111	-1.51749	0.49531	1.63407	1.39526e-05
EPHB2	no	no	-1.86728	-1.74968	-1.24501	-1.88181	-0.903421	-1.37969	-1.32834	0.878869	0.226606	0.0158484	-1.91059	-1.36497	0.603819	1.36415	-2.44917	-1.08694	0.660653	-0.368214	0.534108	-0.836073	-0.860891	-0.0281118	0.369197	-2.14932	-1.86668	-0.551729	0.508053	-0.171967	-0.0127883	-1.39204	0.0953259	-1.25991	0.787576	-0.105659	1.30259	2.82816e-05
PTPN6	yes	no	-4.98347	-5.21321	-4.96934	-4.57704	-4.15711	-4.71804	-4.87761	-3.05002	-3.56868	-3.34093	-4.71039	-3.19027	-3.44093	-6.09264	0.194499	-1.32112	-5.0629	-5.66832	-2.65624	-4.97608	-4.82713	-4.35496	-5.34951	-5.07992	-4.34601	-3.32509	-4.50275	-5.33018	-4.02335	-2.70589	-3.40008	-1.40185	-4.81818	-4.81138	0.738708	0.0335304
CRABP2	no	no	-2.853	-2.56518	-2.9714	-0.584935	-3.02587	-2.14527	-2.41104	0.473362	2.1381	-1.20391	-2.18008	-0.864879	-1.88492	-0.936852	-2.31926	-1.6786	-1.82449	0.648755	-0.0326348	-0.504385	-3.35355	-1.25133	-0.352692	-2.57903	-0.843136	-1.05999	-1.17366	-1.29658	-1.98159	-2.48829	-3.24146	-0.207896	-0.885695	-0.182615	0.99716	0.0260304
COL4A5	no	no	-2.77874	-2.41817	-2.75937	-2.47576	-2.23696	-2.42609	-2.27088	0.467699	-2.06866	-0.473784	-2.31302	-1.94187	-0.178555	-0.409694	-2.8128	-0.960312	-2.22389	-3.4635	-2.69846	-2.29387	-1.17413	-1.77267	0.290591	0.127027	-1.83067	-2.20188	-1.39449	-0.0276805	-0.0040912	-1.99941	-1.8224	-2.775	-1.48572	-0.0838717	1.05667	0.000679155
TKT	no	no	-0.83705	-2.0137	-1.37994	-0.926258	-0.236554	-0.423292	-1.04755	2.06318	3.40995	1.86927	4.98925	5.49199	-0.443128	-1.68883	3.54512	3.74624	-2.87983	2.93024	2.64991	0.910182	-1.15614	-0.0188339	-1.08408	2.22498	2.41959	2.75483	-0.750751	-0.710176	0.93292	2.32121	1.5099	5.03706	-0.480825	0.675286	3.03994	1.22502e-05
SERPINB3	yes	no	0.426561	0.11075	1.1462	4.79534	2.78534	5.47633	0.843452	1.92319	5.38369	4.06867	1.91392	1.21276	0.569641	5.5124	1.58715	0.624778	-1.21216	0.889994	4.21682	2.11081	2.64633	3.82685	1.54835	-0.657459	-0.0761564	0.186324	1.99293	1.19549	0.750287	4.91995	-0.0294964	2.91972	0.614982	1.75812	0.0549617	0.969543
SERPINA4	no	no	1.44666	1.70914	2.48385	1.46177	1.61772	1.89078	2.00443	3.59073	3.41487	4.54192	5.69112	3.10891	1.75933	3.60835	5.69822	6.09024	0.0994848	0.623163	3.06851	1.69293	2.14172	4.97486	5.20937	1.71097	5.26756	2.81007	3.74305	2.60104	5.53725	6.06038	4.44867	3.08699	3.86442	3.53164	2.09893	2.01652e-05
EEF1D	no	no	-2.27044	-2.02593	-2.16964	-2.03799	-2.2054	-2.02167	-2.12342	1.07023	0.361398	-1.02314	-0.531495	-0.387147	-1.95874	-2.57845	0.875965	0.227139	-2.25905	-0.849431	-2.0959	-1.55987	-2.27356	-1.4625	-2.56627	-0.932706	-0.44173	0.0404249	-2.15246	-2.63461	-1.04396	-1.03366	-1.93393	1.13893	-1.68641	-0.735784	1.18063	0.0010243
MARCKS	no	no	-1.05451	0.675008	-1.94475	0.917631	-0.677384	2.45813	0.302756	1.14638	1.48399	1.07039	0.811249	0.639071	1.05936	1.71376	-0.802462	-1.78166	1.32081	-0.419359	1.39669	1.46129	0.281595	-0.0795688	-0.569571	3.93329	-0.419406	1.71056	0.188461	3.52679	-0.902281	-1.14943	0.94051	1.47092	1.10974	0.71523	0.638724	0.382533
AQP1	no	no	-2.78971	-3.17523	-3.39823	-2.84176	-3.08267	-3.61084	-3.85444	-2.24216	-1.00959	-1.56232	-3.28134	-2.86852	-0.550614	-2.98836	-3.05466	-2.78187	-3.41115	-2.91834	-0.976899	-3.1645	-2.8031	-1.67308	-1.92744	-3.74879	-3.38688	-2.79664	-3.47241	-0.849504	-1.80393	-2.81404	-1.42565	-3.25906	-1.52042	-2.42839	0.923444	0.00211547
GNA11	no	no	-0.494089	-1.64165	-2.2976	-0.59916	-1.95725	2.26388	-0.620856	0.720561	-0.282075	-0.664128	-1.36096	-0.379265	1.32537	0.0078481	-0.012436	-1.74626	1.32586	-1.58573	0.187717	-2.28931	3.13426	-0.28458	0.35182	0.207045	-1.03696	-2.14595	-0.541568	0.90673	-0.13189	-1.00754	-0.730073	-1.1083	0.603671	-1.11304	0.589019	0.464039
ALDH4A1	no	no	-3.9258	-3.55807	-3.86031	-4.65519	-4.25819	-3.53911	-4.04321	-3.3557	-2.87573	-3.68559	-3.30242	-4.3972	-4.66318	-4.04191	-4.25189	-3.52289	-3.55992	-5.20375	-3.8883	-4.30935	-4.04405	-3.22894	-5.01436	-0.433153	-5.11563	-3.80784	-4.13453	-3.98306	-4.30269	-3.62813	-4.33609	-4.17437	-4.53551	-3.24437	-0.0401457	0.913595
PBLD	no	no	-2.81534	-2.68516	-3.04104	-2.91514	-2.96115	-3.13958	-3.39131	-3.02535	-0.109491	0.143832	-2.69681	-2.04385	-1.94955	-1.36581	-1.99436	-3.05403	-2.61123	-2.97731	-1.73646	-2.53438	-2.82359	-1.64594	-1.47546	-2.87187	-3.85599	-0.697443	-3.12806	-1.7375	-1.21261	-0.622736	-1.91925	-2.6793	-0.136297	-1.78121	1.02257	0.000171295
ERP29	no	no	-2.42787	-3.28243	-2.91328	-3.11476	-3.61326	-2.89189	-2.38928	0.875765	1.17144	-1.05233	-1.86898	-0.96723	-2.03808	-3.25908	-1.34217	-0.430142	-2.94014	-1.29867	-1.91464	-2.30795	-3.30499	-2.33005	-2.52005	-2.04802	-0.752034	-0.580996	-0.914422	-3.03287	-2.19074	-1.33941	-2.35777	-0.314264	-3.233	-0.561307	1.24811	7.48286e-05
PRDX6	yes	no	0.185492	0.872177	0.683439	2.50079	0.907761	0.996526	0.830172	3.18155	3.55789	2.90566	4.02548	4.58945	1.11876	1.79954	3.63409	2.28173	-0.710882	1.45009	2.6107	1.4921	2.25166	1.28944	2.35898	4.62749	2.7183	5.23265	0.922656	2.72309	2.11492	2.79168	1.57982	4.21594	2.9788	2.18773	1.42484	0.00311013
BLVRB	no	no	-0.818206	-1.2434	-1.33677	-0.892368	-1.29664	-2.70409	-1.62421	0.044719	1.54548	1.65643	0.0372986	-0.192463	-2.24346	-0.223413	0.868856	-0.120364	-2.24232	0.568898	0.792365	-0.234721	1.67327	0.193633	1.71117	1.41277	1.76229	4.56428	-0.460688	0.0224891	-0.54672	0.297189	0.634637	1.34567	0.827346	1.19215	2.22892	7.45747e-06
PRDX5	no	no	-0.543036	-0.339688	-1.06249	-0.716643	-0.339195	-0.557549	-0.351608	2.28507	2.29907	1.68361	3.52296	2.47504	0.505166	-1.22882	1.15893	2.50234	-0.696752	1.5887	2.56305	-0.523133	-1.01553	-0.670631	0.7636	1.75592	2.02948	3.25989	-0.828129	0.671405	0.279757	1.11488	1.15578	4.05199	2.07604	2.2611	1.5088	0.00027208
DDT	no	no	0.0469314	-0.341962	-0.583037	-1.14736	-0.583145	-1.68265	-0.806136	1.95486	2.27867	2.07506	2.52094	2.61493	0.118683	0.884843	1.58626	1.14539	-2.53177	-0.816726	2.49109	-0.579028	-1.16045	0.594432	1.50061	1.00513	1.86654	3.37724	-0.102893	1.80236	0.682418	0.603858	0.443996	3.10373	1.51048	0.8118	1.76959	3.36379e-05
GCHFR	no	no	-2.18852	-1.17252	-1.87816	-2.16072	-1.96836	-4.24786	-1.11591	0.97274	0.894363	0.698357	-0.799898	0.744843	1.95038	1.36814	-0.541414	-1.64784	-0.465606	0.289179	2.53209	-1.57309	-2.06909	4.13899	-0.148518	-0.772267	0.494018	2.03779	0.606363	3.04974	0.41264	0.410731	1.89252	-0.384597	2.68159	-0.0337284	2.8427	0.000131952
PRDX3	no	no	-2.62348	-4.62982	-3.12352	-3.46615	-3.91411	-3.65392	-3.36441	-1.6081	1.27682	-2.87035	-3.38071	0.831885	-2.42384	-0.490147	1.12958	-2.94448	-3.30836	-3.73548	-2.63448	-2.75142	-3.93103	-2.36647	-3.16577	-2.14633	-2.74563	-1.28808	-3.30446	-1.14763	-2.04526	-1.6852	0.127666	-0.248261	-2.68932	-3.07898	1.53997	0.000917592
ATP5F1D	no	no	-3.52261	-3.52187	-3.61132	-3.46616	-3.30335	-3.47554	-3.87244	-3.00684	-3.79681	-2.86103	-4.09912	-3.74653	-3.11673	-3.81455	-3.49929	-3.62035	-3.75525	-3.89735	-2.08541	-3.52553	-2.95356	-3.47076	-3.76119	-0.754808	-3.49273	-3.52442	-3.79334	-1.9611	-3.25372	-4.11111	-3.73092	-3.0138	-2.90385	-2.25678	0.244423	0.324589
RPL12	no	no	-3.94165	-4.24781	-3.5629	-4.3072	-4.47081	-4.58448	-3.92564	-1.60872	-1.56132	-3.11899	-3.01116	-3.24296	-3.94856	-3.87488	-2.47018	-2.8424	-4.51522	-4.33994	-1.66159	-2.48811	-4.46489	-3.8037	-3.79041	-2.33261	-3.90397	-2.38461	-3.98267	-4.58001	-3.64637	-3.84338	-3.9477	-1.80673	-4.38125	-3.30584	0.80806	0.000720192
ECHS1	no	no	-5.51164	-4.87987	-4.90165	-5.51796	-4.75084	-5.18937	-4.55446	-1.7807	-4.01373	-3.86777	-4.81126	-4.26971	-4.90331	-4.96684	-4.84888	-5.03463	-5.66169	-5.13911	-4.51683	-5.26482	-5.34202	-4.738	-5.38831	-5.20137	-3.49022	-2.99284	-5.07186	-4.99633	-5.36129	-3.35514	-5.40803	-5.41949	-4.19953	-4.03541	0.590479	0.02544
CMPK1	no	no	-3.15153	-2.76451	-2.71984	-2.76221	-2.48292	-1.88305	-2.98548	-0.200689	-0.246425	-1.88849	-2.83042	-2.48501	-2.22521	-3.56583	-1.51642	-1.60607	-3.14983	-0.710326	-1.45307	-1.66619	-3.4762	-2.83251	-1.62573	-1.04537	-2.51326	-1.27657	-3.63071	-1.98611	-1.63535	-1.04508	-2.70644	-4.03889	-1.50928	-1.31421	1.01149	0.00333253
PEBP1	no	no	-0.603629	-0.374239	-0.408604	-0.758732	-0.26815	-0.718787	-0.292309	2.24914	3.12658	2.50919	1.72208	3.26052	1.67582	2.90974	1.8408	1.10712	-1.25004	0.334158	1.5334	-0.380865	1.22563	0.739572	0.25919	0.821961	2.12139	1.92844	0.201777	-0.130314	1.37165	1.50778	1.41717	-0.0861855	0.811024	1.12477	1.58419	6.44999e-06
PDIA3	no	no	-2.49479	-1.93286	-3.01123	0.641868	-2.77085	0.361796	-2.63021	0.171804	0.33894	-0.968262	-1.83824	-0.355078	-2.62747	-1.87132	-0.760667	0.00409214	-2.37201	-1.33468	-1.35711	-1.69304	-2.33911	-2.22635	-2.22427	1.25343	-1.53426	-0.855749	-0.989832	-0.344692	-1.23789	-0.498875	-1.19144	-0.231639	-2.66421	-1.93828	0.280915	0.679643
PPP2R1A	no	no	-2.76708	-2.12056	-2.44193	-2.61068	-2.36878	-2.63153	-2.43992	-0.548446	-0.0678075	-0.878998	-0.374227	-1.44268	-2.77169	-2.77941	0.202509	-0.6871	-3.31551	-3.45987	-1.99919	-2.60947	-2.22559	-1.45022	-1.76812	-1.53168	-1.10009	-0.382742	-2.07847	-1.9713	-2.38638	-1.30623	-1.50696	0.448096	-1.70816	-1.35104	1.15527	3.80664e-05
FCER1G	yes	no	-4.04696	-3.74746	-3.00539	-4.55806	-3.69261	-3.69608	-3.69255	-3.4679	-4.12076	-3.62911	-2.12523	0.481771	-3.45081	-3.78928	-1.80537	-2.05136	-3.67436	-3.29461	-2.74271	-3.6329	-3.92557	-2.51577	-4.50815	0.743971	-2.92142	-1.74404	-2.97943	-2.20831	-4.00052	-2.58083	-3.82319	-0.461006	-4.07138	-4.48964	0.624733	0.0914683
[truncated: 1,756 more rows]
